# Supplementary material for: Unstructured regions in IRE1α specify BiP-mediated destabilisation of the luminal domain dimer and repression of the UPR
Source: eLife. 2019 Dec 24;8:e50793. doi: 10.7554/eLife.50793 (PMC6996924; doi:10.7554/eLife.50793)
Supplement: Figure 1—source data 1. [file elife-50793-fig1-data1.xlsx]

## Sheet: Sheet1
	Ratio BiP/IRE1 signal
	rep 1	rep 2	rep 3
IRE1 wt	0.067746	0.141957	0.148319
J-IRE1	0.718714	1.34596	0.730337
J-IRE1 QPD	0.070165	0.208647	0.314473
