# Supplementary material for: Unstructured regions in IRE1α specify BiP-mediated destabilisation of the luminal domain dimer and repression of the UPR
Source: eLife. 2019 Dec 24;8:e50793. doi: 10.7554/eLife.50793 (PMC6996924; doi:10.7554/eLife.50793)
Supplement: Figure 1—source data 2. [file elife-50793-fig1-data2.xlsx]

## Sheet: Rep 1
2018-08-02
Sample
blank	1192	1281	1489	1463	1479	1381	1298	1189	1220	1198	1174	1148	1121	1141	1101	1133	1166	1179	1168	1199	1230	1154	1198	1234	1177	1214	1174	1187	1194	1231	1223	1201	1196	1195	1174	1193	1225	1219	1424	1244	1231	1224	1233	1214	1229	1286	1233	1250	1212
IRE1-OG only	260000	260000	260000	260000	260000	260000	260000	260000	260000	260000	260000	260000	255670	260000	255085	260000	260000	254334	254330	253821	253751	260000	253293	253867	253347	253362	253076	253240	253796	253479	253428	253692	253440	260000	260000	254499	254083	253909	255209	254471	254800	254968	254686	254974	255991	256457	255173	260000	260000
wt TAM	16932	17424	17269	17284	17263	16906	16886	16914	16555	16554	16592	16683	16451	16666	16573	16732	16682	16776	16800	16669	16723	16809	16734	16890	16706	16717	16861	16719	16805	16753	16919	16951	16897	17013	16805	17067	16990	16926	17078	17039	16999	17095	17182	17021	17061	17077	17100	17164	17112
wt 50 uM BiP, 1.25 uM ERdj4 - ATP	18137	18207	18589	18181	18299	18274	18157	18185	18110	18064	18166	18287	18036	18100	18256	18376	18244	18314	18395	18571	18411	18509	18569	18711	18575	18950	18834	18966	19109	19132	19076	19150	19407	19547	19500	19405	19386	19619	19684	19669	19922	19852	19761	19744	19593	19555	19897	19637	19534
wt 50 uM BiP, 1.25 uM ERdj4 + ATP	20892	22383	24125	26071	27876	29284	30760	32098	33192	34182	35116	36186	36725	37846	38351	39276	39482	40742	41243	41920	42519	43219	44058	44369	45175	45645	46595	47336	47886	48745	49420	50098	50456	51466	52084	52996	53306	54169	54879	55589	55932	56880	57828	57995	59027	59578	60722	61399	62310
J4-IRE1-TAM	21498	22166	21994	21631	21608	21280	21386	21383	21412	21253	21238	21166	21368	21376	21389	21338	21348	21464	21403	21405	21542	21543	21706	21819	21609	21729	21801	21830	21803	21862	21786	21918	21881	21967	22054	21987	22073	22091	22047	22016	22097	22106	22050	22305	22038	22196	22192	22315	22211
J4-IRE1-TAM 50 uM BiP -ATP	21558	21584	21846	21694	21385	21558	21398	21297	21400	21479	21462	21447	21387	21740	21663	21549	21683	21754	21809	21800	21905	21818	21954	22065	22247	22047	22079	22155	22131	22100	22310	22352	22615	22460	22667	22706	22701	22988	22865	22882	23179	23101	22893	23031	23073	23236	22914	22958	23047
J4-IRE1-TAM 50 uM BiP +ATP	34578	46155	58585	69582	80239	90069	99629	107834	115441	122618	129272	135872	141182	146738	151335	155207	159037	163267	166218	168702	171433	174130	176219	178798	179970	181934	183192	184754	186010	187229	188424	189121	190014	191563	192406	192997	193533	193569	195203	195758	195687	196552	196889	197669	198453	197966	198354	199005	200131
J4-IRE1-TAM 50 uM BiP, 1.25 uM ERdj4 +ATP	32469	45789	60460	75442	89250	100595	110249	118694	125616	132108	138456	143521	147997	153020	156673	160688	163478	166934	169756	172542	174568	177794	179369	181838	183731	186297	187058	188836	190344	191926	192920	194276	196161	197198	197700	199054	199714	201452	201347	202828	203132	204693	205614	205749	206909	207365	209285	209583	210843
Time (s)	0	30	60	90	120	150	180	210	240	270	300	330	360	390	420	450	480	510	540	570	600	630	660	690	720	750	780	810	840	870	900	930	960	990	1020	1050	1080	1110	1140	1170	1200	1230	1260	1290	1320	1350	1380	1410	1440
	corrected by blank
wt TAM	15740	16143	15780	15821	15784	15525	15588	15725	15335	15356	15418	15535	15330	15525	15472	15599	15516	15597	15632	15470	15493	15655	15536	15656	15529	15503	15687	15532	15611	15522	15696	15750	15701	15818	15631	15874	15765	15707	15654	15795	15768	15871	15949	15807	15832	15791	15867	15914	15900
wt 50 uM BiP, 1.25 uM ERdj4 - ATP	16945	16926	17100	16718	16820	16893	16859	16996	16890	16866	16992	17139	16915	16959	17155	17243	17078	17135	17227	17372	17181	17355	17371	17477	17398	17736	17660	17779	17915	17901	17853	17949	18211	18352	18326	18212	18161	18400	18260	18425	18691	18628	18528	18530	18364	18269	18664	18387	18322
wt 50 uM BiP, 1.25 uM ERdj4 + ATP	19700	21102	22636	24608	26397	27903	29462	30909	31972	32984	33942	35038	35604	36705	37250	38143	38316	39563	40075	40721	41289	42065	42860	43135	43998	44431	45421	46149	46692	47514	48197	48897	49260	50271	50910	51803	52081	52950	53455	54345	54701	55656	56595	56781	57798	58292	59489	60149	61098
J4-IRE1-TAM	20306	20885	20505	20168	20129	19899	20088	20194	20192	20055	20064	20018	20247	20235	20288	20205	20182	20285	20235	20206	20312	20389	20508	20585	20432	20515	20627	20643	20609	20631	20563	20717	20685	20772	20880	20794	20848	20872	20623	20772	20866	20882	20817	21091	20809	20910	20959	21065	20999
J4-IRE1-TAM 50 uM BiP -ATP	20366	20303	20357	20231	19906	20177	20100	20108	20180	20281	20288	20299	20266	20599	20562	20416	20517	20575	20641	20601	20675	20664	20756	20831	21070	20833	20905	20968	20937	20869	21087	21151	21419	21265	21493	21513	21476	21769	21441	21638	21948	21877	21660	21817	21844	21950	21681	21708	21835
J4-IRE1-TAM 50 uM BiP +ATP	33386	44874	57096	68119	78760	88688	98331	106645	114221	121420	128098	134724	140061	145597	150234	154074	157871	162088	165050	167503	170203	172976	175021	177564	178793	180720	182018	183567	184816	185998	187201	187920	188818	190368	191232	191804	192308	192350	193779	194514	194456	195328	195656	196455	197224	196680	197121	197755	198919
J4-IRE1-TAM 50 uM BiP, 1.25 uM ERdj4 +ATP	31277	44508	58971	73979	87771	99214	108951	117505	124396	130910	137282	142373	146876	151879	155572	159555	162312	165755	168588	171343	173338	176640	178171	180604	182554	185083	185884	187649	189150	190695	191697	193075	194965	196003	196526	197861	198489	200233	199923	201584	201901	203469	204381	204535	205680	206079	208052	208333	209631
[truncated: 300 more columns]

## Sheet: Rep 2
2018-08-22
Sample
blank	383	354	362	351	335	357	357	350	358	362	373	372	353	356	352	348	362	345	367	372	343	345	352	348	356	355	353	354	334	353	344	352	366	353	365	349	361	339	355	341	359	349	349	346	348	344	348	343	339
IRE1-OG only	196206	195057	190481	188998	189688	189947	189973	188083	188108	189194	188906	188564	187918	187864	186307	186720	187295	186281	186644	186222	186003	186428	185926	185923	185499	185799	185463	185756	185959	185642	185790	185979	185770	186331	185686	186085	185926	185885	185593	185779	185703	185925	185577	186189	185991	186282	186296	187169	186682
wt TAM	13562	13315	13275	13359	12967	12985	13003	12965	13043	12941	12966	12807	12898	12740	12851	12899	12817	12865	12823	12718	12914	12816	12758	12824	12893	12852	12889	12711	12784	12720	12797	12721	12736	12872	12758	12830	12843	12925	12701	12850	12767	12662	12717	12756	12789	12760	12750	12684	12824
wt 50 uM BiP, 1.25 uM ERdj4 - ATP	15217	15259	15206	15226	15694	15815	15793	15852	15645	15564	15422	15317	15318	15137	15072	15019	14987	15074	14996	15086	15012	14999	14983	15072	14972	15015	14828	14888	14896	14907	14916	14860	14857	15055	15062	15000	14894	15065	14954	14969	15020	15013	14967	15006	14979	15113	15052	15111	15164
wt 50 uM BiP, 1.25 uM ERdj4 + ATP	16403	18076	19860	21453	22936	24122	25261	26206	27282	28331	29013	30055	31200	31901	32675	33572	34562	35579	36448	37092	38083	38779	39814	40768	41595	42437	43272	44223	45295	46261	46804	47703	48362	48897	49901	50868	51483	52268	52619	52111	52672	52430	52191	52387	52302	52768	55719	55690	53399
J4-IRE1-TAM	12406	11929	12022	11871	11945	11984	11981	11962	11913	11901	11921	11986	11951	11886	11997	11847	11821	11999	11972	11966	11813	12012	12002	11965	11889	11993	12013	12006	11920	11868	11948	11866	11938	11966	11795	11974	11860	11962	11976	11945	11939	11910	11917	12039	12016	12014	11989	12023	12007
J4-IRE1-TAM 50 uM BiP -ATP	14707	14888	14933	14917	15116	14910	15056	15239	15269	15241	15237	15292	15196	15186	15101	15064	15004	14894	14914	14915	14844	14839	14895	14846	14875	14922	14745	14824	14993	14866	14856	14738	14811	14760	14830	14875	14959	14904	14818	14892	14841	14842	14800	14886	14806	14788	14788	14838	14871
J4-IRE1-TAM 50 uM BiP +ATP	26573	34934	43276	50842	57681	64263	70683	76837	81639	86890	91087	95624	99235	102641	106246	109690	112616	115711	117889	120159	122040	123892	125892	127816	129321	131488	133255	135321	137143	138125	140299	141844	142162	142770	142375	142400	141983	141711	141033	140691	141429	142322	141930	143005	142806	143192	143709	144639	144376
Time (s)	0	30	60	90	120	150	180	210	240	270	300	330	360	390	420	450	480	510	540	570	600	630	660	690	720	750	780	810	840	870	900	930	960	990	1020	1050	1080	1110	1140	1170	1200	1230	1260	1290	1320	1350	1380	1410	1440
	corrected by blank
wt TAM	13179	12961	12913	13008	12632	12628	12646	12615	12685	12579	12593	12435	12545	12384	12499	12551	12455	12520	12456	12346	12571	12471	12406	12476	12537	12497	12536	12357	12450	12367	12453	12369	12370	12519	12393	12481	12482	12586	12346	12509	12408	12313	12368	12410	12441	12416	12402	12341	12485
wt 50 uM BiP, 1.25 uM ERdj4 - ATP	14834	14905	14844	14875	15359	15458	15436	15502	15287	15202	15049	14945	14965	14781	14720	14671	14625	14729	14629	14714	14669	14654	14631	14724	14616	14660	14475	14534	14562	14554	14572	14508	14491	14702	14697	14651	14533	14726	14599	14628	14661	14664	14618	14660	14631	14769	14704	14768	14825
wt 50 uM BiP, 1.25 uM ERdj4 + ATP	16020	17722	19498	21102	22601	23765	24904	25856	26924	27969	28640	29683	30847	31545	32323	33224	34200	35234	36081	36720	37740	38434	39462	40420	41239	42082	42919	43869	44961	45908	46460	47351	47996	48544	49536	50519	51122	51929	52264	51770	52313	52081	51842	52041	51954	52424	55371	55347	53060
J4-IRE1-TAM	12023	11575	11660	11520	11610	11627	11624	11612	11555	11539	11548	11614	11598	11530	11645	11499	11459	11654	11605	11594	11470	11667	11650	11617	11533	11638	11660	11652	11586	11515	11604	11514	11572	11613	11430	11625	11499	11623	11621	11604	11580	11561	11568	11693	11668	11670	11641	11680	11668
J4-IRE1-TAM 50 uM BiP -ATP	14324	14534	14571	14566	14781	14553	14699	14889	14911	14879	14864	14920	14843	14830	14749	14716	14642	14549	14547	14543	14501	14494	14543	14498	14519	14567	14392	14470	14659	14513	14512	14386	14445	14407	14465	14526	14598	14565	14463	14551	14482	14493	14451	14540	14458	14444	14440	14495	14532
J4-IRE1-TAM 50 uM BiP +ATP	26190	34580	42914	50491	57346	63906	70326	76487	81281	86528	90714	95252	98882	102285	105894	109342	112254	115366	117522	119787	121697	123547	125540	127468	128965	131133	132902	134967	136809	137772	139955	141492	141796	142417	142010	142051	141622	141372	140678	140350	141070	141973	141581	142659	142458	142848	143361	144296	144037
[truncated: 271 more columns]

## Sheet: Rep 3
2018-08-22
Sample
blank	491	474	483	470	459	469	452	460	468	453	444	452	449	437	456	447	449	431	435	443	441	450	431	442	446	468	420	451	455	450	428	456	430	430	436	446	445	443	437	436	429	422	437	421	434	437	435	432	441
IRE1-OG only	203891	200078	191119	188993	188987	188555	187757	187493	188386	188730	188471	187693	188156	187915	188143	187867	188613	188137	188025	188125	187446	188135	187857	188290	187435	187854	187145	187368	187691	186750	187321	187473	187339	187221	187239	187471	186941	187212	186713	187172	186128	186670	186477	186871	187023	186876	186965	187296	187004
wt TAM	12443	12288	12470	12211	12219	12160	12126	12103	12107	12095	11998	12176	11994	12092	12053	11927	12052	11888	12025	12077	12028	11992	12022	11983	11970	12036	11985	12051	12004	11985	12031	11986	11965	12016	11937	11806	11988	12014	12001	11961	11896	11849	11889	11968	11982	11924	11956	11933	11933
wt 50 uM BiP, 1.25 uM ERdj4 - ATP	14323	14382	14222	14383	14315	14307	14490	14472	14683	14695	14661	14634	14563	14288	14375	14310	14328	14195	14194	14252	14203	14076	14074	14159	14196	14153	14203	14126	14254	14074	14258	14185	14091	14174	14142	14146	14198	14073	14038	14069	14200	14079	14198	14159	14182	14198	14196	14148	14158
wt 50 uM BiP, 1.25 uM ERdj4 + ATP	15474	17560	19230	20932	22084	23485	24700	25621	26749	27975	29036	29814	31144	31829	32598	33420	34541	35244	35941	37072	37861	39004	39416	40403	41038	41790	42696	43183	43750	44488	45051	45612	46374	47179	47280	48081	48240	48457	48714	49040	49140	49554	49663	50341	50745	50980	51836	52208	52319
J4-IRE1-TAM	12357	12280	12381	12023	11832	11555	11600	11623	11642	11712	11755	11849	11769	11683	11630	11836	11730	11790	11691	11715	11674	11662	11739	11719	11735	11640	11646	11780	11728	11581	11766	11762	11762	11707	11659	11725	11665	11743	11723	11541	11594	11689	11609	11639	11709	11667	11622	11633	11663
J4-IRE1-TAM 50 uM BiP -ATP	14169	14454	14528	14636	14675	14640	14780	14754	14965	14967	14821	14687	14580	14565	14644	14462	14514	14394	14474	14512	14389	14331	14465	14397	14432	14408	14382	14337	14439	14382	14309	14341	14312	14461	14290	14351	14376	14300	14461	14369	14359	14394	14391	14535	14390	14411	14480	14586	14358
J4-IRE1-TAM 50 uM BiP +ATP	25192	33678	41748	49468	56124	62693	68584	74004	79356	84824	88874	93729	97792	101341	104166	107131	110027	112964	115305	117475	119595	122416	123829	125661	126933	129099	130520	131633	133123	134704	135903	137427	137971	138385	137881	138048	136689	136701	136616	136740	136704	137102	137010	137721	138892	138826	139953	140286	140108
Time (s)	0	30	60	90	120	150	180	210	240	270	300	330	360	390	420	450	480	510	540	570	600	630	660	690	720	750	780	810	840	870	900	930	960	990	1020	1050	1080	1110	1140	1170	1200	1230	1260	1290	1320	1350	1380	1410	1440
	corrected by blank
wt TAM	11952	11814	11987	11741	11760	11691	11674	11643	11639	11642	11554	11724	11545	11655	11597	11480	11603	11457	11590	11634	11587	11542	11591	11541	11524	11568	11565	11600	11549	11535	11603	11530	11535	11586	11501	11360	11543	11571	11564	11525	11467	11427	11452	11547	11548	11487	11521	11501	11492
wt 50 uM BiP, 1.25 uM ERdj4 - ATP	13832	13908	13739	13913	13856	13838	14038	14012	14215	14242	14217	14182	14114	13851	13919	13863	13879	13764	13759	13809	13762	13626	13643	13717	13750	13685	13783	13675	13799	13624	13830	13729	13661	13744	13706	13700	13753	13630	13601	13633	13771	13657	13761	13738	13748	13761	13761	13716	13717
wt 50 uM BiP, 1.25 uM ERdj4 + ATP	14983	17086	18747	20462	21625	23016	24248	25161	26281	27522	28592	29362	30695	31392	32142	32973	34092	34813	35506	36629	37420	38554	38985	39961	40592	41322	42276	42732	43295	44038	44623	45156	45944	46749	46844	47635	47795	48014	48277	48604	48711	49132	49226	49920	50311	50543	51401	51776	51878
J4-IRE1-TAM	11866	11806	11898	11553	11373	11086	11148	11163	11174	11259	11311	11397	11320	11246	11174	11389	11281	11359	11256	11272	11233	11212	11308	11277	11289	11172	11226	11329	11273	11131	11338	11306	11332	11277	11223	11279	11220	11300	11286	11105	11165	11267	11172	11218	11275	11230	11187	11201	11222
J4-IRE1-TAM 50 uM BiP -ATP	13678	13980	14045	14166	14216	14171	14328	14294	14497	14514	14377	14235	14131	14128	14188	14015	14065	13963	14039	14069	13948	13881	14034	13955	13986	13940	13962	13886	13984	13932	13881	13885	13882	14031	13854	13905	13931	13857	14024	13933	13930	13972	13954	14114	13956	13974	14045	14154	13917
J4-IRE1-TAM 50 uM BiP +ATP	24701	33204	41265	48998	55665	62224	68132	73544	78888	84371	88430	93277	97343	100904	103710	106684	109578	112533	114870	117032	119154	121966	123398	125219	126487	128631	130100	131182	132668	134254	135475	136971	137541	137955	137445	137602	136244	136258	136179	136304	136275	136680	136573	137300	138458	138389	139518	139854	139667
[truncated: 271 more columns]
