# Supplementary material for: Unstructured regions in IRE1α specify BiP-mediated destabilisation of the luminal domain dimer and repression of the UPR
Source: eLife. 2019 Dec 24;8:e50793. doi: 10.7554/eLife.50793 (PMC6996924; doi:10.7554/eLife.50793)
Supplement: Figure 2—figure supplement 1—source data 1. [file elife-50793-fig2-figsupp1-data1.xlsx]

## Sheet: titration 2410, 2411, 2076-TAM
run 4				run 3				run 2				run 1				run 8				run 7				run 6				run 5				run 75				run 72				run 85				run 84
2410 1 uM				2410 2.5 uM				2410 6 uM				2410 10 uM				2411 1 uM				2411 2.5 uM				2411 6 uM				2411 10 uM				2076-TAM 1 uM				2076-TAM 2.5 uM				2076-TAM 6 uM				2076-TAM 10 uM
Time	Signal (A280)			Time	Signal (A280)			Time	Signal (A280)			Time	Signal (A280)			Time	Signal (A280)			Time	Signal (A280)			Time	Signal (A280)			Time	Signal (A280)			Time	Signal (A280)			Time	Signal (A280)			Time	Signal (A280)			Time	Signal (A280)
0.00561667	0.00923872			0.000616667	0.00964105			0.00395	0.0124872			0.00561667	0.0107065			0.00208333	0.00394881			0.00561667	0.0132546			0.00228333	0.0176504			0.00395	0.0135377			0.0052	0.0114217			0.00541667	0.00370294			0.00478333	0.0165477			0.00228333	0.00401586
0.0122833	0.0117421			0.00728333	0.0103787			0.0106167	0.0127479			0.0122833	0.0109226			0.00875	0.00482053			0.0122833	0.0134781			0.00895	0.0176504			0.0106167	0.0147521			0.0118667	0.0130087			0.0120833	0.00558794			0.01145	0.016205			0.00895	0.00458211
0.01895	0.0139624			0.01395	0.0115409			0.0172833	0.0135824			0.01895	0.0111759			0.0154167	0.0057295			0.01895	0.0138879			0.0156167	0.0177473			0.0172833	0.0158176			0.0185333	0.0145584			0.01875	0.00735372			0.0181167	0.0159815			0.0156167	0.00493973
0.0256167	0.0157207			0.0206167	0.0126809			0.02395	0.0145212			0.0256167	0.0118762			0.0220833	0.0071004			0.0256167	0.0144914			0.0222833	0.017941			0.02395	0.0169054			0.0252	0.0157505			0.0254167	0.00876933			0.0247833	0.0158772			0.0222833	0.00526756
0.0322833	0.0172853			0.0272833	0.0134706			0.0306167	0.0150353			0.0322833	0.0123978			0.02875	0.00837445			0.0322833	0.0154823			0.02895	0.0179633			0.0306167	0.0181422			0.0318667	0.0161529			0.0320833	0.00980496			0.03145	0.0154153			0.02895	0.00532717
0.03895	0.0185147			0.03395	0.0132695			0.0372833	0.0147671			0.03895	0.0123456			0.0354167	0.00896305			0.03895	0.0164434			0.0356167	0.0176057			0.0372833	0.0192448			0.0385333	0.0160187			0.03875	0.0104234			0.0381167	0.0145659			0.0356167	0.00514835
0.0456167	0.0187978			0.0406167	0.0124797			0.04395	0.0137165			0.0456167	0.011988			0.0420833	0.00871718			0.0456167	0.016816			0.0422833	0.0168383			0.04395	0.0195429			0.0452	0.015609			0.0454167	0.0104755			0.0447833	0.0137985			0.0422833	0.00523776
0.0522833	0.0181049			0.0472833	0.0114813			0.0506167	0.0121519			0.0522833	0.0120848			0.04875	0.00777096			0.0522833	0.0168607			0.04895	0.0158995			0.0506167	0.019066			0.0518667	0.0149161			0.0520833	0.00974536			0.05145	0.0129119			0.04895	0.00536442
0.05895	0.0173226			0.05395	0.0104085			0.0572833	0.0106171			0.05895	0.0123978			0.0554167	0.00670552			0.05895	0.0169426			0.0556167	0.0148118			0.0572833	0.0181347			0.0585333	0.0138283			0.05875	0.00866503			0.0581167	0.0115335			0.0556167	0.00520796
0.0656167	0.0166968			0.0606167	0.00949204			0.06395	0.00920147			0.0656167	0.0125468			0.0620833	0.00547618			0.0656167	0.0171885			0.0622833	0.0135154			0.06395	0.0170171			0.0652	0.0126436			0.0654167	0.00752509			0.0647833	0.00974536			0.0622833	0.00476092
0.0722833	0.0160486			0.0672833	0.00896305			0.0706167	0.0077486			0.0722833	0.0124127			0.06875	0.0045374			0.0722833	0.0169128			0.06895	0.0124499			0.0706167	0.0159889			0.0718667	0.0120401			0.0720833	0.00640005			0.07145	0.00815094			0.06895	0.00450015
0.07895	0.015147			0.07395	0.00926107			0.0772833	0.00654161			0.07895	0.0123829			0.0754167	0.00401586			0.07895	0.0161305			0.0756167	0.0115484			0.0772833	0.0154227			0.0785333	0.0114962			0.07875	0.00528991			0.0781167	0.00713766			0.0756167	0.00430644
0.0856167	0.0140294			0.0806167	0.00996143			0.08395	0.00579655			0.0856167	0.0125989			0.0820833	0.00430644			0.0856167	0.0154674			0.0822833	0.0109226			0.08395	0.0152141			0.0852	0.0111982			0.0854167	0.0044778			0.0847833	0.00670552			0.0822833	0.0038445
0.0922833	0.0131354			0.0872833	0.0105947			0.0906167	0.00520796			0.0922833	0.0127554			0.08875	0.0051111			0.0922833	0.0148043			0.08895	0.0101775			0.0906167	0.015229			0.0918667	0.0112578			0.0920833	0.00429153			0.09145	0.00657886			0.08895	0.00353158
0.09895	0.0124648			0.09395	0.0110269			0.0972833	0.00423938			0.09895	0.0126734			0.0954167	0.0057146			0.09895	0.0139177			0.0956167	0.00952929			0.0972833	0.0155568			0.0985333	0.0115782			0.09875	0.00419468			0.0981167	0.00670552			0.0956167	0.0037998
0.105617	0.0120625			0.100617	0.0112355			0.10395	0.00301748			0.105617	0.0122488			0.102083	0.00607967			0.105617	0.0125915			0.102283	0.00934303			0.10395	0.0159442			0.1052	0.0114068			0.105417	0.00364333			0.104783	0.00695884			0.102283	0.00441819
0.112283	0.0117943			0.107283	0.0110865			0.110617	0.00237674			0.112283	0.0117943			0.10875	0.00634044			0.112283	0.0114366			0.10895	0.00921637			0.110617	0.0156388			0.111867	0.0107437			0.112083	0.00263005			0.11145	0.00740588			0.10895	0.00470877
0.11895	0.0116229			0.11395	0.0104755			0.117283	0.00245124			0.11895	0.0114068			0.115417	0.00654906			0.11895	0.0110492			0.115617	0.00929832			0.117283	0.0145957			0.118533	0.0106543			0.11875	0.00177324			0.118117	0.0076741			0.115617	0.00485033
0.125617	0.0116378			0.120617	0.00938773			0.12395	0.00264496			0.125617	0.0111237			0.122083	0.00647455			0.125617	0.0110492			0.122283	0.00935048			0.12395	0.0134706			0.1252	0.0109896			0.125417	0.00111014			0.124783	0.00756234			0.122283	0.00496209
0.132283	0.0117347			0.127283	0.00825524			0.130617	0.00271946			0.132283	0.01093			0.12875	0.00604987			0.132283	0.011161			0.12895	0.00946969			0.130617	0.0129417			0.131867	0.0112951			0.132083	0.000558794			0.13145	0.00742823			0.12895	0.00464171
0.13895	0.0119582			0.13395	0.00743568			0.137283	0.00287592			0.13895	0.0112057			0.135417	0.00534952			0.13895	0.0112057			0.135617	0.00967085			0.137283	0.0126362			0.138533	0.0110418			0.13875	7.45058e-05			0.138117	0.00692904			0.135617	0.00365824
0.145617	0.0121146			0.140617	0.00726432			0.14395	0.00320375			0.145617	0.0115111			0.142083	0.00456721			0.145617	0.0115782			0.142283	0.00949204			0.14395	0.0124201			0.1452	0.0107437			0.145417	-2.23517e-05			0.144783	0.00613928			0.142283	0.00241399
0.152283	0.0123531			0.147283	0.00768155			0.150617	0.0031665			0.152283	0.0118017			0.14875	0.00374764			0.152283	0.0121966			0.14895	0.00921637			0.150617	0.0125766			0.151867	0.0105426			0.152083	5.21541e-05			0.15145	0.00529736			0.14895	0.00146776
0.15895	0.0125989			0.15395	0.00870973			0.157283	0.00294298			0.15895	0.0120774			0.155417	0.00294298			0.15895	0.0125021			0.155617	0.00872463			0.157283	0.0130758			0.158533	0.0102371			0.15875	-0.000216067			0.158117	0.00483543			0.155617	0.000491738
0.165617	0.0129044			0.160617	0.0103861			0.16395	0.00303239			0.165617	0.0126287			0.162083	0.00211596			0.165617	0.012368			0.162283	0.00859797			0.16395	0.0135526			0.1652	0.0101328			0.165417	-0.000737607			0.164783	0.00479817			0.162283	-0.000521541
0.172283	0.012964			0.167283	0.0123605			0.170617	0.00340492			0.172283	0.0132397			0.16875	0.00173599			0.172283	0.0122413			0.16895	0.00862032			0.170617	0.0133961			0.171867	0.0103489			0.172083	-0.00117719			0.17145	0.00479817			0.16895	-0.000983477
0.17895	0.0125393			0.17395	0.0135377			0.177283	0.00388175			0.17895	0.0131428			0.175417	0.0018701			0.17895	0.0121891			0.175617	0.00847876			0.177283	0.0128299			0.178533	0.0109896			0.17875	-0.00109524			0.178117	0.0051111			0.175617	-0.000871718
0.185617	0.0117868			0.180617	0.0136718			0.18395	0.00429898			0.185617	0.0128895			0.182083	0.00238419			0.185617	0.0118837			0.182283	0.00849366			0.18395	0.0122711			0.1852	0.0115186			0.185417	-0.00102073			0.184783	0.00549853			0.182283	-0.000230968
0.192283	0.0109822			0.187283	0.0130162			0.190617	0.00510365			0.192283	0.0129342			0.18875	0.00286847			0.192283	0.011377			0.18895	0.00862777			0.190617	0.0118092			0.191867	0.0119433			0.192083	-0.000871718			0.19145	0.00541657			0.18895	0.000558794
0.19895	0.010401			0.19395	0.0119358			0.197283	0.0057444			0.19895	0.0134259			0.195417	0.00353903			0.19895	0.0107363			0.195617	0.00897795			0.197283	0.011012			0.198533	0.0122935			0.19875	-0.000476837			0.198117	0.00488013			0.195617	0.00140071
0.205617	0.010334			0.200617	0.0108555			0.20395	0.00573695			0.205617	0.0138655			0.202083	0.00420213			0.205617	0.0101402			0.202283	0.00891834			0.20395	0.00997633			0.2052	0.0124499			0.205417	9.68575e-05			0.204783	0.00417233			0.202283	0.00178814
0.212283	0.0106916			0.207283	0.00998378			0.210617	0.00546128			0.212283	0.0140369			0.20875	0.00457466			0.212283	0.00946969			0.20895	0.00886619			0.210617	0.00931323			0.211867	0.0122935			0.212083	0.000685453			0.21145	0.0037998			0.20895	0.00158697
0.21895	0.0111163			0.21395	0.00986457			0.217283	0.00523776			0.21895	0.0142679			0.215417	0.00479817			0.21895	0.00920892			0.215617	0.00922382			0.217283	0.00918657			0.218533	0.0120103			0.21875	0.00116974			0.218117	0.00394881			0.215617	0.0013113
0.225617	0.0113472			0.220617	0.0102744			0.22395	0.00519306			0.225617	0.014402			0.222083	0.00475347			0.225617	0.00955164			0.222283	0.01017			0.22395	0.00935793			0.2252	0.0120327			0.225417	0.00190735			0.224783	0.00448525			0.222283	0.000916421
0.232283	0.011459			0.227283	0.0111237			0.230617	0.00456721			0.232283	0.0142604			0.22875	0.00464171			0.232283	0.0101626			0.22895	0.0115484			0.230617	0.00936538			0.231867	0.0122339			0.232083	0.00267476			0.23145	0.00525266			0.22895	0.000394881
0.23895	0.0114441			0.23395	0.0120699			0.237283	0.00359118			0.23895	0.0135601			0.235417	0.0045076			0.23895	0.0105873			0.235617	0.0124499			0.237283	0.00958145			0.238533	0.0122935			0.23875	0.00324845			0.238117	0.0057444			0.235617	-0.000409782
0.245617	0.0109598			0.240617	0.0129715			0.24395	0.00295043			0.245617	0.0124872			0.242083	0.00494719			0.245617	0.0108629			0.242283	0.0123382			0.24395	0.01017			0.2452	0.0120401			0.245417	0.00342727			0.244783	0.00568479			0.242283	-0.000871718
0.252283	0.0102967			0.247283	0.0138432			0.250617	0.00283122			0.252283	0.011228			0.24875	0.00601262			0.252283	0.0114739			0.24895	0.0113994			0.250617	0.0105724			0.251867	0.0114962			0.252083	0.00345707			0.25145	0.00530481			0.24895	-0.00104308
0.25895	0.0104159			0.25395	0.0143573			0.257283	0.00295788			0.25895	0.00993908			0.255417	0.00686944			0.25895	0.0122488			0.255617	0.0106618			0.257283	0.0106916			0.258533	0.0106245			0.25875	0.00350922			0.258117	0.0045523			0.255617	-0.00117719
0.265617	0.0112429			0.260617	0.0143051			0.26395	0.00340492			0.265617	0.00885129			0.262083	0.00728667			0.265617	0.0128299			0.262283	0.0103861			0.26395	0.0103861			0.2652	0.00993908			0.265417	0.00378489			0.264783	0.00361353			0.262283	-0.00146031
0.272283	0.0117198			0.267283	0.0137985			0.270617	0.00429898			0.272283	0.00783801			0.26875	0.0070557			0.272283	0.0131577			0.26895	0.0101775			0.270617	0.0101179			0.271867	0.00964105			0.272083	0.00405312			0.27145	0.00245869			0.26895	-0.001885
0.27895	0.0115857			0.27395	0.0135824			0.277283	0.00563264			0.27895	0.00743568			0.275417	0.00631064			0.27895	0.0136346			0.275617	0.0101477			0.277283	0.00981241			0.278533	0.00958145			0.27875	0.00400096			0.278117	0.00160187			0.275617	-0.00216812
0.285617	0.011526			0.280617	0.0134781			0.28395	0.00678003			0.285617	0.00749528			0.282083	0.00494719			0.285617	0.0142902			0.282283	0.0106916			0.28395	0.00943989			0.2852	0.00938028			0.285417	0.00365078			0.284783	0.00133365			0.282283	-0.00223517
0.292283	0.0120476			0.287283	0.0126138			0.290617	0.00727177			0.292283	0.0083074			0.28875	0.00326335			0.292283	0.0148267			0.28895	0.0113845			0.290617	0.00924617			0.291867	0.00946224			0.292083	0.00307709			0.29145	0.00157207			0.28895	-0.00239164
0.29895	0.0125542			0.29395	0.0109226			0.297283	0.00721961			0.29895	0.00950694			0.295417	0.00216812			0.29895	0.0155643			0.295617	0.0113845			0.297283	0.00926852			0.298533	0.0101626			0.29875	0.0025183			0.298117	0.00224262			0.295617	-0.00263751
0.305617	0.0127926			0.300617	0.00939518			0.30395	0.00640005			0.305617	0.0106394			0.302083	0.00216067			0.305617	0.016436			0.302283	0.0106692			0.30395	0.00949204			0.3052	0.0104681			0.305417	0.00213087			0.304783	0.00309199			0.302283	-0.00248104
0.312283	0.0132024			0.307283	0.0083968			0.310617	0.00531226			0.312283	0.0115037			0.30875	0.0031814			0.312283	0.0169873			0.30895	0.0096485			0.310617	0.0101104			0.311867	0.00977516			0.312083	0.00183284			0.31145	0.00398606			0.30895	-0.00180304
0.31895	0.0139922			0.31395	0.00724196			0.317283	0.00420213			0.31895	0.0119209			0.315417	0.00448525			0.31895	0.0169352			0.315617	0.00858307			0.317283	0.0110343			0.318533	0.00847131			0.31875	0.00174344			0.318117	0.00445545			0.315617	-0.00101328
0.325617	0.0149906			0.320617	0.00607967			0.32395	0.00371039			0.325617	0.0122711			0.322083	0.00565499			0.325617	0.0163913			0.322283	0.0077039			0.32395	0.0119805			0.3252	0.00769645			0.325417	0.00228733			0.324783	0.00441074			0.322283	-0.000633299
0.332283	0.0155419			0.327283	0.00584126			0.330617	0.00397861			0.332283	0.0122637			0.32875	0.00627339			0.332283	0.0154823			0.32895	0.00759959			0.330617	0.0127256			0.331867	0.00746548			0.332083	0.00345707			0.33145	0.00376999			0.32895	-0.000484288
0.33895	0.0152364			0.33395	0.00681728			0.337283	0.0045374			0.33895	0.0119433			0.335417	0.00631809			0.33895	0.0139773			0.335617	0.00807643			0.337283	0.0132322			0.338533	0.00753254			0.33875	0.0044778			0.338117	0.00257045			0.335617	-0.000402331
0.345617	0.0141636			0.340617	0.00786036			0.34395	0.00495464			0.345617	0.0114888			0.342083	0.00538677			0.345617	0.0123233			0.342283	0.00859052			0.34395	0.013642			0.3452	0.00783801			0.345417	0.00432134			0.344783	0.00128895			0.342283	-0.000528991
0.352283	0.0130832			0.347283	0.00834465			0.350617	0.005126			0.352283	0.0111088			0.34875	0.00373274			0.352283	0.0110194			0.34895	0.00870228			0.350617	0.0135675			0.351867	0.00792742			0.352083	0.00331551			0.35145	0.000342727			0.34895	-0.00102073
0.35895	0.0120476			0.35395	0.00853837			0.357283	0.0051707			0.35895	0.0106916			0.355417	0.00187755			0.35895	0.010334			0.355617	0.0090003			0.357283	0.0129044			0.358533	0.00791997			0.35875	0.00236928			0.358117	7.45058e-05			0.355617	-0.00180304
0.365617	0.0109673			0.360617	0.00890344			0.36395	0.00503659			0.365617	0.0102818			0.362083	0.000461936			0.365617	0.0103563			0.362283	0.009574			0.36395	0.0120774			0.3652	0.00791252			0.365417	0.00175834			0.364783	0.000290573			0.362283	-0.00230968
0.372283	0.00995398			0.367283	0.00936538			0.370617	0.004448			0.372283	0.0101253			0.36875	2.23517e-05			0.372283	0.011079			0.36895	0.01017			0.370617	0.0117272			0.371867	0.00814349			0.372083	0.0012219			0.37145	0.000976026			0.36895	-0.00239909
0.37895	0.00979006			0.37395	0.00951439			0.377283	0.00383705			0.37895	0.0103861			0.375417	0.000491738			0.37895	0.0118762			0.375617	0.0103414			0.377283	0.0121444			0.378533	0.00787526			0.37875	0.000432134			0.378117	0.0019297			0.375617	-0.0025034
0.385617	0.010781			0.380617	0.00969321			0.38395	0.0038445			0.385617	0.0107959			0.382083	0.00178814			0.385617	0.012055			0.382283	0.0101551			0.38395	0.0130534			0.3852	0.00716001			0.385417	-0.000305474			0.384783	0.00263751			0.382283	-0.00290573
0.392283	0.0120774			0.387283	0.00997633			0.390617	0.0045076			0.392283	0.0112727			0.38875	0.00362098			0.392283	0.0117123			0.38895	0.0104085			0.390617	0.0139475			0.391867	0.00712275			0.392083	-0.000417233			0.39145	0.0032708			0.38895	-0.0032112
0.39895	0.0131279			0.39395	0.0104904			0.397283	0.00545382			0.39895	0.0117794			0.395417	0.00540912			0.39895	0.0115186			0.395617	0.0111312			0.397283	0.0149012			0.398533	0.0077486			0.39875	-0.000432134			0.398117	0.00377744			0.395617	-0.00303239
0.405617	0.0133663			0.400617	0.0106022			0.40395	0.00621378			0.405617	0.0124574			0.402083	0.00670552			0.405617	0.0115559			0.402283	0.011988			0.40395	0.015825			0.4052	0.008367			0.405417	-0.000573695			0.404783	0.00426918			0.402283	-0.00289083
0.412283	0.0131503			0.407283	0.0101775			0.410617	0.0070408			0.412283	0.0131577			0.40875	0.00697374			0.412283	0.0114441			0.40895	0.012055			0.410617	0.0160933			0.411867	0.0083521			0.412083	-0.00102818			0.41145	0.00420958			0.40895	-0.00301749
0.41895	0.0124499			0.41395	0.00974536			0.417283	0.00760704			0.41895	0.0138208			0.415417	0.00654906			0.41895	0.0111014			0.415617	0.0117496			0.417283	0.0152737			0.418533	0.00818819			0.41875	-0.00119209			0.418117	0.00351667			0.415617	-0.00291318
0.425617	0.0115335			0.420617	0.00938028			0.42395	0.00763684			0.425617	0.0142455			0.422083	0.00593811			0.425617	0.010781			0.422283	0.011459			0.42395	0.0137463			0.4252	0.00812113			0.425417	-0.000804663			0.424783	0.00311434			0.422283	-0.00245869
0.432283	0.0105798			0.427283	0.00931323			0.430617	0.00716001			0.432283	0.0141785			0.42875	0.00545382			0.432283	0.0105202			0.42895	0.0112429			0.430617	0.0123233			0.431867	0.00806898			0.432083	2.98023e-05			0.43145	0.00296533			0.42895	-0.00183284
0.43895	0.0101477			0.43395	0.00882894			0.437283	0.00658631			0.43895	0.0137836			0.435417	0.00523031			0.43895	0.0101998			0.435617	0.0106469			0.437283	0.0111088			0.438533	0.00819564			0.43875	0.00116974			0.438117	0.00305474			0.435617	-0.00124425
0.445617	0.0106171			0.440617	0.00831485			0.44395	0.00582635			0.445617	0.0132844			0.442083	0.00542402			0.445617	0.00997633			0.442283	0.00982732			0.44395	0.0100359			0.4452	0.00862032			0.445417	0.00172853			0.444783	0.00299513			0.442283	-0.000596046
0.452283	0.0115409			0.447283	0.00826269			0.450617	0.00457466			0.452283	0.0129938			0.44875	0.00607967			0.452283	0.0100657			0.44895	0.00928342			0.450617	0.00956655			0.451867	0.0089556			0.452083	0.00183284			0.45145	0.00305474			0.44895	0.00013411
0.45895	0.012666			0.45395	0.00855327			0.457283	0.00358373			0.45895	0.0128821			0.455417	0.00663102			0.45895	0.0108406			0.455617	0.00920147			0.457283	0.00985712			0.458533	0.00914931			0.45875	0.00163168			0.458117	0.00361353			0.455617	0.000178814
0.465617	0.013642			0.460617	0.009045			0.46395	0.00328571			0.465617	0.0131279			0.462083	0.00648201			0.465617	0.011988			0.462283	0.00924617			0.46395	0.0106618			0.4652	0.0090152			0.465417	0.00147521			0.464783	0.00400096			0.462283	-0.000707805
0.472283	0.0149235			0.467283	0.00920892			0.470617	0.00335276			0.472283	0.0136569			0.46875	0.00550598			0.472283	0.0132099			0.46895	0.0090152			0.470617	0.0110418			0.471867	0.00869483			0.472083	0.0012368			0.47145	0.00415742			0.46895	-0.00235438
0.47895	0.0160635			0.47395	0.00926107			0.477283	0.00314415			0.47895	0.0145286			0.475417	0.00426918			0.47895	0.0141934			0.475617	0.00867993			0.477283	0.0111088			0.478533	0.00823289			0.47875	0.000789762			0.478117	0.00437349			0.475617	-0.00419468
0.485617	0.0167564			0.480617	0.00912696			0.48395	0.00334531			0.485617	0.0151992			0.482083	0.00308454			0.485617	0.0145584			0.482283	0.00829995			0.48395	0.0111759			0.4852	0.00778586			0.485417	0.000678003			0.484783	0.00464916			0.482283	-0.00568479
0.492283	0.0169575			0.487283	0.00869483			0.490617	0.00455976			0.492283	0.0155196			0.48875	0.00242144			0.492283	0.0141412			0.48895	0.00841171			0.490617	0.0114366			0.491867	0.00787526			0.492083	0.000819564			0.49145	0.0051409			0.48895	-0.00676513
0.49895	0.0166818			0.49395	0.00840425			0.497283	0.00584126			0.49895	0.0152811			0.495417	0.00233948			0.49895	0.0129044			0.495617	0.00877678			0.497283	0.0120774			0.498533	0.00853836			0.49875	0.00110269			0.498117	0.00564009			0.495617	-0.00693649
0.505617	0.0160486			0.500617	0.00844151			0.50395	0.00666827			0.505617	0.0145957			0.502083	0.00297278			0.505617	0.0118911			0.502283	0.00918657			0.50395	0.0127107			0.5052	0.00970811			0.505417	0.0012666			0.504783	0.00625104			0.502283	-0.00593811
0.512283	0.0149459			0.507283	0.00885874			0.510617	0.00732392			0.512283	0.0141785			0.50875	0.00397116			0.512283	0.0117049			0.50895	0.0096485			0.510617	0.0133216			0.511867	0.01093			0.512083	0.00111759			0.51145	0.00647455			0.50895	-0.00428408
0.51895	0.0137761			0.51395	0.00951439			0.517283	0.00821799			0.51895	0.0140071			0.515417	0.0051558			0.51895	0.0121519			0.515617	0.0103936			0.517283	0.0135303			0.518533	0.0116453			0.51875	0.000998378			0.518117	0.00589341			0.515617	-0.00277907
0.525617	0.0130162			0.520617	0.0103638			0.52395	0.00867248			0.525617	0.0140667			0.522083	0.00628084			0.525617	0.0128001			0.522283	0.0114143			0.52395	0.0134334			0.5252	0.0120848			0.525417	0.000953674			0.524783	0.00535697			0.522283	-0.00214577
0.532283	0.0126883			0.527283	0.0112131			0.530617	0.00812113			0.532283	0.014022			0.52875	0.00701845			0.532283	0.0135154			0.52895	0.0120699			0.530617	0.0131652			0.531867	0.0122339			0.532083	0.00114739			0.53145	0.00517815			0.52895	-0.00216067
0.53895	0.0127777			0.53395	0.0114068			0.537283	0.00727177			0.53895	0.0140816			0.535417	0.00713021			0.53895	0.0146404			0.535617	0.0122711			0.537283	0.0123158			0.538533	0.0119433			0.53875	0.00152737			0.538117	0.00520796			0.535617	-0.00263751
0.545617	0.0131577			0.540617	0.0108406			0.54395	0.00660121			0.545617	0.0144392			0.542083	0.00664592			0.545617	0.0157803			0.542283	0.0123978			0.54395	0.0111982			0.5452	0.0111088			0.545417	0.00223517			0.544783	0.00498444			0.542283	-0.00345707
0.552283	0.0139698			0.547283	0.0100806			0.550617	0.00617653			0.552283	0.0146553			0.54875	0.00611693			0.552283	0.0163019			0.54895	0.0123009			0.550617	0.0105277			0.551867	0.0100955			0.552083	0.00295043			0.55145	0.00458211			0.54895	-0.00425428
0.55895	0.0151321			0.55395	0.00952184			0.557283	0.00619143			0.55895	0.0146553			0.555417	0.00565499			0.55895	0.0161007			0.555617	0.0117496			0.557283	0.0107363			0.558533	0.0096038			0.55875	0.00336766			0.558117	0.00426918			0.555617	-0.00473112
0.565617	0.0161529			0.560617	0.00905246			0.56395	0.00655651			0.565617	0.0143796			0.562083	0.00489503			0.565617	0.0157058			0.562283	0.0108629			0.56395	0.0110716			0.5652	0.00916421			0.565417	0.00360608			0.564783	0.00417978			0.562283	-0.00462681
0.572283	0.0166148			0.567283	0.00840425			0.570617	0.00695884			0.572283	0.0140294			0.56875	0.00363588			0.572283	0.0154376			0.56895	0.010103			0.570617	0.0109449			0.571867	0.00826269			0.572083	0.00377744			0.57145	0.00438839			0.56895	-0.00430644
0.57895	0.0163019			0.57395	0.00784546			0.577283	0.00683218			0.57895	0.0137389			0.575417	0.00241399			0.57895	0.0150129			0.575617	0.0096783			0.577283	0.0107884			0.578533	0.00741333			0.57875	0.00397861			0.578117	0.00479072			0.575617	-0.00438094
0.585617	0.0153482			0.580617	0.00756234			0.58395	0.00616163			0.585617	0.0137612			0.582083	0.00198185			0.585617	0.0143275			0.582283	0.00932813			0.58395	0.0109673			0.5852	0.00751018			0.585417	0.00386685			0.584783	0.00526011			0.582283	-0.00488758
0.592283	0.0141934			0.587283	0.00743568			0.590617	0.00531226			0.592283	0.0139549			0.58875	0.00244379			0.592283	0.0138357			0.58895	0.00923127			0.590617	0.01131			0.591867	0.00834465			0.592083	0.00375509			0.59145	0.0057891			0.58895	-0.00549108
0.59895	0.0129938			0.59395	0.00735372			0.597283	0.00409782			0.59895	0.0141934			0.595417	0.00335276			0.59895	0.0136793			0.595617	0.00954419			0.597283	0.0113398			0.598533	0.00918657			0.59875	0.00355393			0.598117	0.00648201			0.595617	-0.0057593
0.605617	0.0118688			0.600617	0.00733882			0.60395	0.00289083			0.605617	0.0146255			0.602083	0.00464171			0.605617	0.0134408			0.602283	0.00992417			0.60395	0.0115409			0.6052	0.00982732			0.605417	0.00303239			0.604783	0.00670552			0.602283	-0.0058338
0.612283	0.0110343			0.607283	0.00765175			0.610617	0.00208616			0.612283	0.0154972			0.60875	0.00606477			0.612283	0.0131577			0.60895	0.0100434			0.610617	0.0118762			0.611867	0.010632			0.612083	0.00219792			0.61145	0.00616908			0.60895	-0.00589341
0.61895	0.0105798			0.61395	0.00815094			0.617283	0.00227988			0.61895	0.0166222			0.615417	0.00755489			0.61895	0.0128448			0.615617	0.0100806			0.617283	0.0121891			0.618533	0.0113472			0.61875	0.00102818			0.618117	0.00520051			0.615617	-0.00529736
0.625617	0.0107065			0.620617	0.00880659			0.62395	0.0031516			0.625617	0.0173599			0.622083	0.00852346			0.625617	0.0126362			0.622283	0.0104234			0.62395	0.0120923			0.6252	0.0116751			0.625417	6.70552e-05			0.624783	0.00428408			0.622283	-0.00412017
0.632283	0.0110641			0.627283	0.00958145			0.630617	0.00419468			0.632283	0.0179186			0.62875	0.00891834			0.632283	0.0122041			0.62895	0.010848			0.630617	0.0116006			0.631867	0.0118688			0.632083	-0.00077486			0.63145	0.00371039			0.62895	-0.00303984
0.63895	0.0116825			0.63395	0.0104159			0.637283	0.00528246			0.63895	0.01809			0.635417	0.00864267			0.63895	0.0117645			0.635617	0.010781			0.637283	0.0111684			0.638533	0.0119284			0.63875	-0.00125915			0.638117	0.00331551			0.635617	-0.00298768
0.645617	0.0126138			0.640617	0.0113919			0.64395	0.006482			0.645617	0.0179857			0.642083	0.00775605			0.645617	0.0114888			0.642283	0.0102594			0.64395	0.0109598			0.6452	0.0117272			0.645417	-0.00127405			0.644783	0.00312179			0.642283	-0.00334531
0.652283	0.0135824			0.647283	0.0124797			0.650617	0.00761449			0.652283	0.0175014			0.64875	0.00698119			0.652283	0.0113472			0.64895	0.00976026			0.650617	0.0110865			0.651867	0.0113323			0.652083	-0.000819564			0.65145	0.00315905			0.64895	-0.00351667
0.65895	0.0143871			0.65395	0.0133887			0.657283	0.00811368			0.65895	0.0170246			0.655417	0.00666082			0.65895	0.0116676			0.655617	0.00917912			0.657283	0.0116453			0.658533	0.0112057			0.65875	0.00012666			0.658117	0.00301003			0.655617	-0.00368059
0.665617	0.0149906			0.660617	0.0134334			0.66395	0.00826269			0.665617	0.016585			0.662083	0.00669062			0.665617	0.0123754			0.662283	0.0083521			0.66395	0.0125617			0.6652	0.0117272			0.665417	0.000804663			0.664783	0.00283867			0.662283	-0.00409782
0.672283	0.0152588			0.667283	0.0126287			0.670617	0.00828505			0.672283	0.0158995			0.66875	0.0064373			0.672283	0.013344			0.66895	0.00760704			0.670617	0.0137165			0.671867	0.0126511			0.672083	0.00134856			0.67145	0.00280887			0.66895	-0.00457466
0.67895	0.014998			0.67395	0.0118688			0.677283	0.00826269			0.67895	0.0152886			0.675417	0.00608712			0.67895	0.0140741			0.675617	0.00713766			0.677283	0.0146851			0.678533	0.0135824			0.67875	0.00169128			0.678117	0.00296533			0.675617	-0.00431389
0.685617	0.0142306			0.680617	0.0112504			0.68395	0.00792742			0.685617	0.0147298			0.682083	0.00616908			0.685617	0.0145212			0.682283	0.00710785			0.68395	0.0150502			0.6852	0.0140071			0.685417	0.00190735			0.684783	0.0031814			0.682283	-0.0038445
0.692283	0.0137836			0.687283	0.0105351			0.690617	0.00737608			0.692283	0.0146329			0.68875	0.00628829			0.692283	0.0146925			0.68895	0.00721216			0.690617	0.0147745			0.691867	0.0139102			0.692083	0.00196695			0.69145	0.0032112			0.68895	-0.00358373
0.69895	0.0141561			0.69395	0.00977516			0.697283	0.00731647			0.69895	0.0147298			0.695417	0.00585616			0.69895	0.0146478			0.695617	0.00750273			0.697283	0.0137761			0.698533	0.013195			0.69875	0.00204146			0.698117	0.00336766			0.695617	-0.00409782
0.705617	0.0145584			0.700617	0.00971556			0.70395	0.00734627			0.705617	0.0148416			0.702083	0.00488758			0.705617	0.0141934			0.702283	0.00753999			0.70395	0.0127256			0.7052	0.011757			0.705417	0.00265241			0.704783	0.00353903			0.702283	-0.00501424
0.712283	0.0145808			0.707283	0.0101849			0.710617	0.00732392			0.712283	0.0147596			0.70875	0.00400096			0.712283	0.0134036			0.70895	0.00734627			0.710617	0.011839			0.711867	0.010021			0.712083	0.00360608			0.71145	0.00364333			0.70895	-0.00598282
0.71895	0.0143349			0.71395	0.0103414			0.717283	0.00692904			0.71895	0.0145137			0.715417	0.00354648			0.71895	0.0126958			0.715617	0.00746548			0.717283	0.0111088			0.718533	0.00858307			0.71875	0.00442564			0.718117	0.00365078			0.715617	-0.00683218
0.725617	0.0140145			0.720617	0.0101849			0.72395	0.00650436			0.725617	0.0143871			0.722083	0.00313669			0.725617	0.0124574			0.722283	0.00800937			0.72395	0.0104308			0.7252	0.00837445			0.725417	0.00462681			0.724783	0.00388175			0.722283	-0.00742078
0.732283	0.0135601			0.727283	0.0100285			0.730617	0.00620633			0.732283	0.0139698			0.72875	0.00290573			0.732283	0.0125021			0.72895	0.00849366			0.730617	0.010021			0.731867	0.00949949			0.732083	0.0045076			0.73145	0.00444055			0.72895	-0.00754744
0.73895	0.012964			0.73395	0.0102371			0.737283	0.00613183			0.73895	0.0130609			0.735417	0.00299513			0.73895	0.0123307			0.735617	0.00834465			0.737283	0.0105351			0.738533	0.0115335			0.73875	0.0038296			0.738117	0.00510365			0.735617	-0.00695884
0.745617	0.0125617			0.740617	0.0105947			0.74395	0.00622869			0.745617	0.0125021			0.742083	0.00350922			0.745617	0.0122041			0.742283	0.00797957			0.74395	0.0115111			0.7452	0.0137091			0.745417	0.00279397			0.744783	0.00546873			0.742283	-0.00581145
0.752283	0.0124127			0.747283	0.0111908			0.750617	0.00608712			0.752283	0.0127554			0.74875	0.00400841			0.752283	0.0125393			0.74895	0.00768155			0.750617	0.0125617			0.751867	0.0152811			0.752083	0.00146776			0.75145	0.00533462			0.74895	-0.00435859
0.75895	0.0124276			0.75395	0.0118241			0.757283	0.00559539			0.75895	0.0136793			0.755417	0.00439584			0.75895	0.0130758			0.755617	0.00742078			0.757283	0.0134706			0.758533	0.0163689			0.75875	0.000327826			0.758117	0.00499189			0.755617	-0.00315905
0.765617	0.0126287			0.760617	0.0124201			0.76395	0.00491738			0.765617	0.014402			0.762083	0.00489503			0.765617	0.0132099			0.762283	0.00717491			0.76395	0.0142306			0.7652	0.0167117			0.765417	-0.000171363			0.764783	0.00463426			0.762283	-0.00225008
0.772283	0.0129789			0.767283	0.0128523			0.770617	0.00478327			0.772283	0.0146255			0.76875	0.00563264			0.772283	0.0128075			0.76895	0.00724941			0.770617	0.0147298			0.771867	0.0164062			0.772083	-0.000394881			0.77145	0.00466406			0.76895	-0.00173599
0.77895	0.013046			0.77395	0.0129864			0.777283	0.00473112			0.77895	0.0151321			0.775417	0.00631064			0.77895	0.012666			0.775617	0.0077039			0.777283	0.0142232			0.778533	0.0154823			0.77875	-8.9407e-05			0.778117	0.00514835			0.775617	-0.00151247
0.785617	0.012964			0.780617	0.012897			0.78395	0.00466406			0.785617	0.0159293			0.782083	0.00667572			0.785617	0.0130907			0.782283	0.00854582			0.78395	0.0132173			0.7852	0.0144392			0.785417	0.000432134			0.784783	0.00592321			0.782283	-0.00157952
0.792283	0.0129417			0.787283	0.0126585			0.790617	0.00441074			0.792283	0.0168383			0.78875	0.0069961			0.792283	0.0137538			0.78895	0.00929087			0.790617	0.0118911			0.791867	0.0137761			0.792083	0.0012368			0.79145	0.00678748			0.78895	-0.00212342
0.79895	0.0131652			0.79395	0.0124127			0.797283	0.00455231			0.79895	0.017345			0.795417	0.00717491			0.79895	0.0141785			0.795617	0.0101924			0.797283	0.0110939			0.798533	0.0135005			0.79875	0.00213087			0.798117	0.00754744			0.795617	-0.00306964
0.805617	0.0137985			0.800617	0.0121221			0.80395	0.00507384			0.805617	0.0177175			0.802083	0.00730157			0.805617	0.0142679			0.802283	0.0110865			0.80395	0.0109226			0.8052	0.0137016			0.805417	0.00303984			0.804783	0.00809133			0.802283	-0.00423938
0.812283	0.01432			0.807283	0.0117272			0.810617	0.00545382			0.812283	0.0184774			0.80875	0.0070855			0.812283	0.0147596			0.80895	0.0116378			0.810617	0.0111759			0.811867	0.0139549			0.812083	0.00382215			0.81145	0.00800192			0.80895	-0.00559539
0.81895	0.0145063			0.81395	0.0114813			0.817283	0.00567734			0.81895	0.0191107			0.815417	0.00676513			0.81895	0.0152886			0.815617	0.0119358			0.817283	0.0118017			0.818533	0.0141114			0.81875	0.00417978			0.818117	0.00759214			0.815617	-0.00655651
0.825617	0.0143647			0.820617	0.0112131			0.82395	0.00583381			0.825617	0.0191703			0.822083	0.00656396			0.825617	0.0153929			0.822283	0.0115111			0.82395	0.0124648			0.8252	0.0142828			0.825417	0.00401586			0.824783	0.00753254			0.822283	-0.00684708
0.832283	0.0142008			0.827283	0.0109076			0.830617	0.00630319			0.832283	0.0184551			0.82875	0.00642985			0.832283	0.0149384			0.82895	0.0108927			0.830617	0.0134259			0.831867	0.0144988			0.832083	0.00372529			0.83145	0.00777096			0.82895	-0.00655651
0.83895	0.0142008			0.83395	0.0107437			0.837283	0.00695884			0.83895	0.0172481			0.835417	0.00630319			0.83895	0.0147372			0.835617	0.00973791			0.837283	0.014171			0.838533	0.014551			0.83875	0.00347197			0.838117	0.00771135			0.835617	-0.00610203
0.845617	0.0138283			0.840617	0.0108257			0.84395	0.00752509			0.845617	0.0160486			0.842083	0.0057891			0.845617	0.0153109			0.842283	0.00840425			0.84395	0.0145137			0.8452	0.0142306			0.845417	0.00312179			0.844783	0.00745058			0.842283	-0.00596046
0.852283	0.0129491			0.847283	0.011228			0.850617	0.00771135			0.852283	0.0148565			0.84875	0.00507385			0.852283	0.0158623			0.84895	0.00736862			0.850617	0.0146031			0.851867	0.0137612			0.852083	0.00279397			0.85145	0.00748783			0.84895	-0.00576675
0.85895	0.0122264			0.85395	0.0118315			0.857283	0.00761449			0.85895	0.013791			0.855417	0.00470132			0.85895	0.0157803			0.855617	0.00681728			0.857283	0.0147			0.858533	0.0135377			0.85875	0.00295788			0.858117	0.00753254			0.855617	-0.00599027
0.865617	0.0118539			0.860617	0.0126064			0.86395	0.00739098			0.865617	0.0128001			0.862083	0.00491738			0.865617	0.0150427			0.862283	0.0070557			0.86395	0.0147969			0.8652	0.0133291			0.865417	0.0039041			0.864783	0.00721216			0.862283	-0.00686944
0.872283	0.0117049			0.867283	0.0131056			0.870617	0.00713766			0.872283	0.0122562			0.86875	0.00555813			0.872283	0.0145212			0.86895	0.0077486			0.870617	0.014551			0.871867	0.012733			0.872083	0.0050813			0.87145	0.00687689			0.86895	-0.00818819
0.87895	0.0111684			0.87395	0.0131503			0.877283	0.00671297			0.87895	0.0124648			0.875417	0.00641495			0.87895	0.0143573			0.875617	0.00858307			0.877283	0.0141636			0.878533	0.0120401			0.87875	0.00596792			0.878117	0.00686198			0.875617	-0.00952929
0.885617	0.0105202			0.880617	0.0131056			0.88395	0.00625104			0.885617	0.0130385			0.882083	0.00732392			0.885617	0.0140443			0.882283	0.00914186			0.88395	0.0140294			0.8852	0.0115037			0.885417	0.00655651			0.884783	0.00690669			0.882283	-0.0107214
0.892283	0.0104755			0.887283	0.0130534			0.890617	0.00584126			0.892283	0.0138134			0.88875	0.00812113			0.892283	0.013046			0.88895	0.00916421			0.890617	0.0138655			0.891867	0.0108257			0.892083	0.00675768			0.89145	0.00663102			0.88895	-0.0120923
0.89895	0.0109822			0.89395	0.0129491			0.897283	0.00543147			0.89895	0.0145882			0.895417	0.0083819			0.89895	0.0116527			0.895617	0.00885874			0.897283	0.0136197			0.898533	0.0101253			0.89875	0.00624359			0.898117	0.00615418			0.895617	-0.013262
0.905617	0.0117645			0.900617	0.0126213			0.90395	0.00535697			0.905617	0.0155419			0.902083	0.00806898			0.905617	0.0106096			0.902283	0.00840425			0.90395	0.0133067			0.9052	0.0096336			0.905417	0.00499934			0.904783	0.00559539			0.902283	-0.0139847
0.912283	0.012219			0.907283	0.0125244			0.910617	0.00596791			0.912283	0.0165328			0.90875	0.00721216			0.912283	0.00973791			0.90895	0.00817329			0.910617	0.0133589			0.911867	0.00962615			0.912083	0.00353158			0.91145	0.00504404			0.90895	-0.0139773
0.91895	0.0125915			0.91395	0.0126585			0.917283	0.00677258			0.91895	0.0174046			0.915417	0.00605732			0.91895	0.0089705			0.915617	0.00850856			0.917283	0.0138506			0.918533	0.00943989			0.91875	0.00270456			0.918117	0.00514835			0.915617	-0.0130609
0.925617	0.0127703			0.920617	0.0129938			0.92395	0.00713766			0.925617	0.0180751			0.922083	0.00522286			0.925617	0.00864267			0.922283	0.00914186			0.92395	0.014253			0.9252	0.00941008			0.925417	0.00254065			0.924783	0.0057444			0.922283	-0.0112578
0.932283	0.013046			0.927283	0.0132844			0.930617	0.0070259			0.932283	0.0182912			0.92875	0.00502169			0.932283	0.00914931			0.92895	0.00982732			0.930617	0.0143647			0.931867	0.0100583			0.932083	0.00294298			0.93145	0.00630319			0.92895	-0.0090301
0.93895	0.0134483			0.93395	0.0134185			0.937283	0.00693649			0.93895	0.0179633			0.935417	0.00526011			0.93895	0.0103116			0.935617	0.0101924			0.937283	0.0141487			0.938533	0.0110045			0.93875	0.00348687			0.938117	0.00642985			0.935617	-0.00693649
0.945617	0.0139177			0.940617	0.013575			0.94395	0.00700355			0.945617	0.0171289			0.942083	0.00540912			0.945617	0.0113919			0.942283	0.0102744			0.94395	0.0139549			0.9452	0.0118464			0.945417	0.0038296			0.944783	0.00637025			0.942283	-0.00538677
0.952283	0.0144839			0.947283	0.0140518			0.950617	0.00688434			0.952283	0.0163242			0.94875	0.00553578			0.952283	0.011906			0.94895	0.00980496			0.950617	0.0138357			0.951867	0.0124127			0.952083	0.00374019			0.95145	0.00632554			0.94895	-0.00447035
0.95895	0.0151023			0.95395	0.014849			0.957283	0.00662357			0.95895	0.0157505			0.955417	0.00595301			0.95895	0.0120699			0.955617	0.00845641			0.957283	0.0135526			0.958533	0.0132024			0.95875	0.00304729			0.958117	0.0057593			0.955617	-0.00417978
0.965617	0.0161976			0.960617	0.0152662			0.96395	0.0064075			0.965617	0.0153556			0.962083	0.0064373			0.965617	0.011906			0.962283	0.00680238			0.96395	0.0132471			0.9652	0.0135601			0.965417	0.00207126			0.964783	0.00460446			0.962283	-0.0045523
0.972283	0.0170395			0.967283	0.0154451			0.970617	0.00611693			0.972283	0.0151247			0.96875	0.00644475			0.972283	0.0119135			0.96895	0.00552833			0.970617	0.0131726			0.971867	0.0133663			0.972083	0.00108778			0.97145	0.00321865			0.96895	-0.00523031
0.97895	0.0172034			0.97395	0.0157431			0.977283	0.00583381			0.97895	0.0152141			0.975417	0.00612438			0.97895	0.0118613			0.975617	0.00530481			0.977283	0.0134706			0.978533	0.0127405			0.97875	0.00038743			0.978117	0.00263005			0.975617	-0.00619888
0.985617	0.0169724			0.980617	0.0163764			0.98395	0.00556558			0.985617	0.0156611			0.982083	0.00595301			0.985617	0.0118017			0.982283	0.00596792			0.98395	0.0139028			0.9852	0.0118986			0.985417	0.000238419			0.984783	0.00284612			0.982283	-0.00709295
0.992283	0.0168532			0.987283	0.016734			0.990617	0.00541657			0.992283	0.0157729			0.98875	0.00607967			0.992283	0.012055			0.98895	0.00697374			0.990617	0.014171			0.991867	0.0111386			0.992083	0.000551343			0.99145	0.00348687			0.98895	-0.00753999
0.99895	0.0169873			0.99395	0.0161752			0.997283	0.00559539			0.99895	0.0153854			0.995417	0.00627339			0.99895	0.0124425			0.995617	0.00826269			0.997283	0.0143796			0.998533	0.0107959			0.99875	0.00133365			0.998117	0.00401586			0.995617	-0.00755489
1.00562	0.016816			1.00062	0.0151247			1.00395	0.00622124			1.00562	0.0144839			1.00208	0.00628084			1.00562	0.0126734			1.00228	0.00955164			1.00395	0.0144467			1.0052	0.0111535			1.00542	0.00238419			1.00478	0.0044927			1.00228	-0.00709295
1.01228	0.0167042			1.00728	0.0140369			1.01062	0.00749528			1.01228	0.0134408			1.00875	0.00657141			1.01228	0.0122637			1.00895	0.0103116			1.01062	0.014402			1.01187	0.0117794			1.01208	0.0031814			1.01145	0.00517815			1.00895	-0.00674278
1.01895	0.0168458			1.01395	0.0132173			1.01728	0.00882894			1.01895	0.0125691			1.01542	0.00678003			1.01895	0.0119954			1.01562	0.0102893			1.01728	0.0141785			1.01853	0.0125021			1.01875	0.00341982			1.01812	0.00559539			1.01562	-0.00660866
1.02562	0.0168309			1.02062	0.012733			1.02395	0.00955164			1.02562	0.0121295			1.02208	0.0070408			1.02562	0.0122339			1.02228	0.00967085			1.02395	0.0138059			1.0252	0.0132993			1.02542	0.00301749			1.02478	0.00569969			1.02228	-0.00668317
1.03228	0.0163838			1.02728	0.0124276			1.03062	0.00922382			1.03228	0.0126436			1.02875	0.00736117			1.03228	0.012897			1.02895	0.00926107			1.03062	0.0135377			1.03187	0.0140145			1.03208	0.00222772			1.03145	0.00552088			1.02895	-0.00680238
1.03895	0.0158325			1.03395	0.0127777			1.03728	0.0083074			1.03895	0.0139326			1.03542	0.00745058			1.03895	0.0132546			1.03562	0.00926107			1.03728	0.0135675			1.03853	0.0142157			1.03875	0.00139326			1.03812	0.00526011			1.03562	-0.0070408
1.04562	0.0154674			1.04062	0.0133142			1.04395	0.00738353			1.04562	0.0155717			1.04208	0.00742823			1.04562	0.0130758			1.04228	0.00955164			1.04395	0.014171			1.0452	0.0138655			1.04542	0.000827014			1.04478	0.00499189			1.04228	-0.0076443
1.05228	0.0149459			1.04728	0.0139773			1.05062	0.00654161			1.05228	0.0167638			1.04875	0.00684708			1.05228	0.0129044			1.04895	0.010021			1.05062	0.0150651			1.05187	0.0136271			1.05208	0.00108778			1.05145	0.00486523			1.04895	-0.00819564
1.05895	0.0143424			1.05395	0.0142306			1.05728	0.00584871			1.05895	0.0172779			1.05542	0.00659376			1.05895	0.0127032			1.05562	0.010021			1.05728	0.0157431			1.05853	0.0135675			1.05875	0.0018999			1.05812	0.0050962			1.05562	-0.00806898
1.06562	0.0139624			1.06062	0.01394			1.06395	0.00546873			1.06562	0.0173673			1.06208	0.00663102			1.06562	0.0124499			1.06228	0.0096485			1.06395	0.0159889			1.0652	0.0136867			1.06542	0.00294298			1.06478	0.00540912			1.06228	-0.00714511
1.07228	0.0140965			1.06728	0.0133589			1.07062	0.00567734			1.07228	0.0167936			1.06875	0.00672042			1.07228	0.0117645			1.06895	0.00886619			1.07062	0.0158846			1.07187	0.0136793			1.07208	0.00383705			1.07145	0.00567734			1.06895	-0.00641495
1.07895	0.0144765			1.07395	0.0127256			1.07728	0.00627339			1.07895	0.0159368			1.07542	0.00673532			1.07895	0.0109375			1.07562	0.00804663			1.07728	0.0157431			1.07853	0.0134781			1.07875	0.0044331			1.07812	0.00596792			1.07562	-0.00651181
1.08562	0.0150204			1.08062	0.0125542			1.08395	0.00687689			1.08562	0.0151619			1.08208	0.00655651			1.08562	0.0105575			1.08228	0.00734627			1.08395	0.015527			1.0852	0.0130907			1.08542	0.00470132			1.08478	0.00610948			1.08228	-0.00685453
1.09228	0.0158548			1.08728	0.0123903			1.09062	0.00725687			1.09228	0.0151023			1.08875	0.00664592			1.09228	0.01055			1.08895	0.0071004			1.09062	0.0151321			1.09187	0.0123456			1.09208	0.00438839			1.09145	0.00589341			1.08895	-0.00685453
1.09895	0.0164658			1.09395	0.0122637			1.09728	0.00756234			1.09895	0.0156239			1.09542	0.00666082			1.09895	0.0109151			1.09562	0.00754744			1.09728	0.0146627			1.09853	0.0113845			1.09875	0.00357628			1.09812	0.00536442			1.09562	-0.00656396
1.10562	0.0166968			1.10062	0.0123158			1.10395	0.00775605			1.10562	0.0163093			1.10208	0.0063777			1.10562	0.0114441			1.10228	0.00856072			1.10395	0.0142232			1.1052	0.0104904			1.10542	0.0025332			1.10478	0.00523031			1.10228	-0.00669807
1.11228	0.016503			1.10728	0.0126809			1.11062	0.00785291			1.11228	0.0172108			1.10875	0.00578165			1.11228	0.0120699			1.10895	0.00975281			1.11062	0.013873			1.11187	0.00986457			1.11208	0.00206381			1.11145	0.00545382			1.10895	-0.00727177
1.11895	0.0158548			1.11395	0.0131056			1.11728	0.00781566			1.11895	0.0179186			1.11542	0.00530481			1.11895	0.0129193			1.11562	0.0109673			1.11728	0.0133216			1.11853	0.00952929			1.11875	0.00220537			1.11812	0.00552833			1.11562	-0.00748038
1.12562	0.0151992			1.12062	0.0133365			1.12395	0.00772625			1.12562	0.0185221			1.12208	0.00534207			1.12562	0.0138506			1.12228	0.0118241			1.12395	0.0125244			1.1252	0.00938773			1.12542	0.0025034			1.12478	0.00549853			1.12228	-0.00740588
1.13228	0.0144243			1.12728	0.013493			1.13062	0.00751764			1.13228	0.0189245			1.12875	0.00568479			1.13228	0.0150651			1.12895	0.0121668			1.13062	0.011906			1.13187	0.00949949			1.13208	0.00248104			1.13145	0.00572205			1.12895	-0.00727922
1.13895	0.0140071			1.13395	0.0136122			1.13728	0.00709295			1.13895	0.0191703			1.13542	0.00601262			1.13895	0.0160784			1.13562	0.0122264			1.13728	0.0117198			1.13853	0.00994652			1.13875	0.00260025			1.13812	0.00604987			1.13562	-0.0077039
1.14562	0.0141114			1.14062	0.013642			1.14395	0.00672042			1.14562	0.0188649			1.14208	0.00607967			1.14562	0.0165254			1.14228	0.0120401			1.14395	0.0120401			1.1452	0.010252			1.14542	0.00330806			1.14478	0.00572205			1.14228	-0.0082776
1.15228	0.014618			1.14728	0.0137389			1.15062	0.00638515			1.15228	0.0182763			1.14875	0.00608712			1.15228	0.0162944			1.14895	0.011608			1.15062	0.0122637			1.15187	0.0105351			1.15208	0.00423193			1.15145	0.00458956			1.14895	-0.00859052
1.15895	0.0153333			1.15395	0.0140294			1.15728	0.00607222			1.15895	0.0180379			1.15542	0.00604987			1.15895	0.0157878			1.15562	0.0105053			1.15728	0.0122711			1.15853	0.0106469			1.15875	0.00499189			1.15812	0.00364333			1.15562	-0.00888854
1.16562	0.0154376			1.16062	0.0144839			1.16395	0.00561774			1.16562	0.0181049			1.16208	0.00608712			1.16562	0.0153407			1.16228	0.00958145			1.16395	0.0122786			1.1652	0.0110045			1.16542	0.00564009			1.16478	0.0032708			1.16228	-0.00917912
1.17228	0.0155643			1.16728	0.0148863			1.17062	0.00548363			1.17228	0.0180826			1.16875	0.00627339			1.17228	0.014551			1.16895	0.00946969			1.17062	0.0125915			1.17187	0.0115708			1.17208	0.0064522			1.17145	0.00321865			1.16895	-0.00923872
1.17895	0.0160635			1.17395	0.0151023			1.17728	0.00565499			1.17895	0.0177398			1.17542	0.0064671			1.17895	0.0137687			1.17562	0.0101477			1.17728	0.0132471			1.17853	0.0121891			1.17875	0.00720471			1.17812	0.00329316			1.17562	-0.00860542
1.18562	0.0165477			1.18062	0.0153482			1.18395	0.00604987			1.18562	0.0173077			1.18208	0.0064671			1.18562	0.0132322			1.18228	0.0105277			1.18395	0.0137463			1.1852	0.0126213			1.18542	0.00744313			1.18478	0.00371784			1.18228	-0.00745803
1.19228	0.0164583			1.18728	0.0156164			1.19062	0.00671297			1.19228	0.0166819			1.18875	0.00622123			1.19228	0.0130907			1.18895	0.0104457			1.19062	0.0144765			1.19187	0.0127628			1.19208	0.00735372			1.19145	0.0045374			1.18895	-0.00633299
1.19895	0.0158846			1.19395	0.0158846			1.19728	0.0076741			1.19895	0.0157282			1.19542	0.00590831			1.19895	0.0130907			1.19562	0.0104457			1.19728	0.0153631			1.19853	0.0131652			1.19875	0.00701845			1.19812	0.0051558			1.19562	-0.0051707
1.20562	0.0155345			1.20062	0.0158623			1.20395	0.00890344			1.20562	0.0146106			1.20208	0.00552833			1.20562	0.0130758			1.20228	0.0104532			1.20395	0.0163019			1.2052	0.0135526			1.20542	0.00610948			1.20478	0.00523031			1.20228	-0.00400096
1.21228	0.0152364			1.20728	0.0155866			1.21062	0.0096932			1.21228	0.0137091			1.20875	0.00490248			1.21228	0.0133216			1.20895	0.00992417			1.21062	0.0166371			1.21187	0.0135005			1.21208	0.00488013			1.21145	0.00477582			1.20895	-0.00297278
1.21895	0.0147149			1.21395	0.0151992			1.21728	0.00965595			1.21895	0.0132918			1.21542	0.00420213			1.21895	0.0134408			1.21562	0.00867248			1.21728	0.0166148			1.21853	0.0129044			1.21875	0.00414997			1.21812	0.00414997			1.21562	-0.00249594
1.22562	0.0144988			1.22062	0.0144169			1.22395	0.00905245			1.22562	0.013411			1.22208	0.00391901			1.22562	0.013411			1.22228	0.00787526			1.22395	0.0167936			1.2252	0.0124797			1.22542	0.00414997			1.22478	0.0032559			1.22228	-0.00274181
1.23228	0.0150204			1.22728	0.013493			1.23062	0.00848621			1.23228	0.0140369			1.22875	0.00438839			1.23228	0.0134483			1.22895	0.00760704			1.23062	0.0168979			1.23187	0.0124872			1.23208	0.00432879			1.23145	0.00234693			1.22895	-0.0031665
1.23895	0.0157356			1.23395	0.0126809			1.23728	0.00791252			1.23895	0.0149533			1.23542	0.00537932			1.23895	0.0133514			1.23562	0.00746548			1.23728	0.0167564			1.23853	0.0126362			1.23875	0.00423193			1.23812	0.00147521			1.23562	-0.00360608
1.24562	0.0162944			1.24062	0.0123754			1.24395	0.00710785			1.24562	0.0161678			1.24208	0.00604242			1.24562	0.0129044			1.24228	0.0070408			1.24395	0.0162348			1.2452	0.0128895			1.24542	0.00437349			1.24478	0.00109524			1.24228	-0.00426918
1.25228	0.0164062			1.24728	0.012733			1.25062	0.00630319			1.25228	0.0172257			1.24875	0.0064373			1.25228	0.0123233			1.24895	0.00683218			1.25062	0.0158921			1.25187	0.0136644			1.25208	0.00467896			1.25145	0.00130385			1.24895	-0.00561774
1.25895	0.0162348			1.25395	0.0135228			1.25728	0.00644475			1.25895	0.0178441			1.25542	0.00677258			1.25895	0.012137			1.25562	0.00742078			1.25728	0.0156537			1.25853	0.0151172			1.25875	0.00467151			1.25812	0.00155717			1.25562	-0.00718981
1.26562	0.0157133			1.26062	0.0144988			1.26395	0.00759214			1.26562	0.0181869			1.26208	0.00753254			1.26562	0.0122115			1.26228	0.00819564			1.26395	0.0154674			1.2652	0.0170097			1.26542	0.00421703			1.26478	0.001885			1.26228	-0.00812858
1.27228	0.0146553			1.26728	0.0149906			1.27062	0.00882894			1.27228	0.0184402			1.26875	0.00815839			1.27228	0.0123978			1.26895	0.00861287			1.27062	0.01546			1.27187	0.0185743			1.27208	0.00341237			1.27145	0.00236183			1.26895	-0.0082776
1.27895	0.0138879			1.27395	0.0149831			1.27728	0.0095591			1.27895	0.0187457			1.27542	0.00852346			1.27895	0.0130162			1.27562	0.00887364			1.27728	0.0154525			1.27853	0.0193268			1.27875	0.00289083			1.27812	0.00333041			1.27562	-0.00817329
1.28562	0.0134483			1.28062	0.0147894			1.28395	0.00973791			1.28562	0.0187457			1.28208	0.00894815			1.28562	0.0141263			1.28228	0.00945479			1.28395	0.0154302			1.2852	0.0192821			1.28542	0.00286847			1.28478	0.00435859			1.28228	-0.00793487
1.29228	0.0136122			1.28728	0.014469			1.29062	0.00972301			1.29228	0.0187084			1.28875	0.00933558			1.29228	0.0153556			1.28895	0.00999123			1.29062	0.0155941			1.29187	0.0186041			1.29208	0.00336021			1.29145	0.00511855			1.28895	-0.00727177
1.29895	0.0137612			1.29395	0.0139698			1.29728	0.00929832			1.29895	0.0189319			1.29542	0.0096783			1.29895	0.0162497			1.29562	0.00977516			1.29728	0.0159368			1.29853	0.0173375			1.29875	0.0038892			1.29812	0.00541657			1.29562	-0.0064224
1.30562	0.0138432			1.30062	0.0134259			1.30395	0.00823289			1.30562	0.0192672			1.30208	0.00944734			1.30562	0.0166073			1.30228	0.00897795			1.30395	0.0164583			1.3052	0.0156909			1.30542	0.00438094			1.30478	0.00524521			1.30228	-0.00581145
1.31228	0.0141263			1.30728	0.013344			1.31062	0.00668317			1.31228	0.0194609			1.30875	0.00879169			1.31228	0.0164807			1.30895	0.00876933			1.31062	0.0165775			1.31187	0.0144392			1.31208	0.00496209			1.31145	0.00491738			1.30895	-0.00569224
1.31895	0.0142157			1.31395	0.0137761			1.31728	0.00528991			1.31895	0.0194982			1.31542	0.00786036			1.31895	0.0157952			1.31562	0.00910461			1.31728	0.016585			1.31853	0.0138283			1.31875	0.00546873			1.31812	0.00485778			1.31562	-0.00606477
1.32562	0.0139549			1.32062	0.0143871			1.32395	0.00471622			1.32562	0.0196248			1.32208	0.00676513			1.32562	0.0149161			1.32228	0.00972301			1.32395	0.016436			1.3252	0.0133216			1.32542	0.00559539			1.32478	0.00504404			1.32228	-0.00682473
1.33228	0.013411			1.32728	0.0148639			1.33062	0.00456721			1.33228	0.0201389			1.32875	0.00606477			1.33228	0.0140294			1.32895	0.0101626			1.33062	0.0160187			1.33187	0.0127703			1.33208	0.00503659			1.33145	0.00489503			1.32895	-0.00760704
1.33895	0.0131801			1.33395	0.0152737			1.33728	0.00437349			1.33895	0.0205562			1.33542	0.00593811			1.33895	0.0133291			1.33562	0.0105798			1.33728	0.0154898			1.33853	0.0125617			1.33875	0.00462681			1.33812	0.00460446			1.33562	-0.00813603
1.34562	0.0135452			1.34062	0.0159666			1.34395	0.00415742			1.34562	0.0207052			1.34208	0.00613928			1.34562	0.0132918			1.34228	0.0110194			1.34395	0.0144839			1.3452	0.0127926			1.34542	0.00457466			1.34478	0.00439584			1.34228	-0.00843406
1.35228	0.0141338			1.34728	0.0165105			1.35062	0.00411272			1.35228	0.0206232			1.34875	0.00625104			1.35228	0.0137761			1.34895	0.0108927			1.35062	0.0136569			1.35187	0.0132248			1.35208	0.00502914			1.35145	0.00425428			1.34895	-0.00846386
1.35895	0.0146702			1.35395	0.0165254			1.35728	0.00450015			1.35895	0.020802			1.35542	0.00625849			1.35895	0.0147298			1.35562	0.0104159			1.35728	0.0132024			1.35853	0.0136122			1.35875	0.00547618			1.35812	0.00362843			1.35562	-0.00789762
1.36562	0.0150278			1.36062	0.0158772			1.36395	0.00535697			1.36562	0.0212938			1.36208	0.00645965			1.36562	0.015676			1.36228	0.0096783			1.36395	0.0135601			1.3652	0.0142828			1.36542	0.00549853			1.36478	0.00293553			1.36228	-0.00685453
1.37228	0.0153556			1.36728	0.0150576			1.37062	0.00686199			1.37228	0.0212863			1.36875	0.00675768			1.37228	0.0162572			1.36895	0.00909716			1.37062	0.0143722			1.37187	0.0147894			1.37208	0.00526756			1.37145	0.00294298			1.36895	-0.00575185
1.37895	0.0157207			1.37395	0.0145808			1.37728	0.00850856			1.37895	0.0209361			1.37542	0.00665337			1.37895	0.0163242			1.37562	0.00897795			1.37728	0.0151619			1.37853	0.0149906			1.37875	0.00494719			1.37812	0.0038147			1.37562	-0.00495464
1.38562	0.0158697			1.38062	0.0143722			1.38395	0.00970811			1.38562	0.0205189			1.38208	0.0064373			1.38562	0.0155941			1.38228	0.00922382			1.38395	0.0158176			1.3852	0.0144839			1.38542	0.00483543			1.38478	0.00531226			1.38228	-0.00485033
1.39228	0.0158921			1.38728	0.0142455			1.39062	0.0106096			1.39228	0.0202656			1.38875	0.00650436			1.39228	0.0145659			1.38895	0.0101402			1.39062	0.0162423			1.39187	0.0133812			1.39208	0.00455976			1.39145	0.00648201			1.38895	-0.00529736
1.39895	0.0158325			1.39395	0.0141263			1.39728	0.0113621			1.39895	0.0193119			1.39542	0.00695884			1.39895	0.0136569			1.39562	0.0112504			1.39728	0.016287			1.39853	0.0122711			1.39875	0.00403821			1.39812	0.00707805			1.39562	-0.00604242
1.40562	0.0158101			1.40062	0.0141636			1.40395	0.0115931			1.40562	0.0178441			1.40208	0.00762939			1.40562	0.0132546			1.40228	0.0122339			1.40395	0.0157878			1.4052	0.01169			1.40542	0.00393391			1.40478	0.00675768			1.40228	-0.00675768
1.41228	0.015609			1.40728	0.0144169			1.41062	0.0112802			1.41228	0.0168383			1.40875	0.0083223			1.41228	0.0131279			1.40895	0.0128746			1.41062	0.0148639			1.41187	0.0120029			1.41208	0.00461191			1.41145	0.00612438			1.40895	-0.00753254
1.41895	0.0151768			1.41395	0.0146478			1.41728	0.0109896			1.41895	0.0165999			1.41542	0.00890344			1.41895	0.0134185			1.41562	0.0132173			1.41728	0.0139847			1.41853	0.0126287			1.41875	0.0051707			1.41812	0.00525266			1.41562	-0.00821054
1.42562	0.0145361			1.42062	0.0144988			1.42395	0.0114292			1.42562	0.0168607			1.42208	0.00908226			1.42562	0.0140369			1.42228	0.013575			1.42395	0.013575			1.4252	0.0133514			1.42542	0.00479072			1.42478	0.00412762			1.42228	-0.00838935
1.43228	0.0139475			1.42728	0.0141859			1.43062	0.0122413			1.43228	0.017345			1.42875	0.00863522			1.43228	0.0146627			1.42895	0.0136048			1.43062	0.0134408			1.43187	0.0143349			1.43208	0.00376999			1.43145	0.00341237			1.42895	-0.00816584
1.43895	0.0137761			1.43395	0.0139996			1.43728	0.013113			1.43895	0.0185966			1.43542	0.00800192			1.43895	0.0149384			1.43562	0.0132993			1.43728	0.0135005			1.43853	0.0154153			1.43875	0.00310689			1.43812	0.0031814			1.43562	-0.00805408
1.44562	0.0141412			1.44062	0.0142157			1.44395	0.013724			1.44562	0.0201613			1.44208	0.00739098			1.44562	0.0151619			1.44228	0.0129193			1.44395	0.0137463			1.4452	0.0161305			1.44542	0.00280142			1.44478	0.00356138			1.44228	-0.0083819
1.45228	0.0149161			1.44728	0.0146553			1.45062	0.0141785			1.45228	0.0213236			1.44875	0.00683963			1.45228	0.0159219			1.44895	0.0128224			1.45062	0.0143126			1.45187	0.0158176			1.45208	0.0025034			1.45145	0.00397861			1.44895	-0.00871718
1.45895	0.0156462			1.45395	0.0151545			1.45728	0.0145063			1.45895	0.0220165			1.45542	0.00657886			1.45895	0.0165924			1.45562	0.0125319			1.45728	0.0148192			1.45853	0.015147			1.45875	0.00249594			1.45812	0.00445545			1.45562	-0.0090301
1.46562	0.016287			1.46062	0.0156984			1.46395	0.014171			1.46562	0.0224784			1.46208	0.00672787			1.46562	0.0172183			1.46228	0.0118837			1.46395	0.0149608			1.4652	0.0147298			1.46542	0.00280142			1.46478	0.00516325			1.46228	-0.00917912
1.47228	0.016965			1.46728	0.0161082			1.47062	0.0131652			1.47228	0.0225976			1.46875	0.00762194			1.47228	0.0176132			1.46895	0.0112429			1.47062	0.0148118			1.47187	0.0147074			1.47208	0.00334531			1.47145	0.00561029			1.46895	-0.00924617
1.47895	0.0174046			1.47395	0.0164211			1.47728	0.0116751			1.47895	0.0219271			1.47542	0.00827014			1.47895	0.0178814			1.47562	0.0111461			1.47728	0.0145361			1.47853	0.0150651			1.47875	0.00389665			1.47812	0.00566989			1.47562	-0.00932068
1.48562	0.0173301			1.48062	0.0168681			1.48395	0.0103861			1.48562	0.0207573			1.48208	0.0083223			1.48562	0.0177622			1.48228	0.0113174			1.48395	0.014089			1.4852	0.015609			1.48542	0.00468642			1.48478	0.00534207			1.48228	-0.00921637
1.49228	0.0163987			1.48728	0.0173226			1.49062	0.00926852			1.49228	0.0197887			1.48875	0.00785291			1.49228	0.0170991			1.48895	0.0111833			1.49062	0.0134856			1.49187	0.0166148			1.49208	0.00565499			1.49145	0.00500679			1.48895	-0.00910461
1.49895	0.0154898			1.49395	0.0174269			1.49728	0.00835955			1.49895	0.0191033			1.49542	0.00731647			1.49895	0.0164211			1.49562	0.0109822			1.49728	0.0131056			1.49853	0.0176281			1.49875	0.00594556			1.49812	0.00482798			1.49562	-0.00878423
1.50562	0.0146553			1.50062	0.0172406			1.50395	0.00827014			1.50562	0.0187382			1.50208	0.00686198			1.50562	0.0156388			1.50228	0.010848			1.50395	0.0131056			1.5052	0.0183508			1.50542	0.00544637			1.50478	0.00490248			1.50228	-0.00865757
1.51228	0.0138357			1.50728	0.0174716			1.51062	0.00911206			1.51228	0.0185966			1.50875	0.00633299			1.51228	0.0148118			1.50895	0.0107884			1.51062	0.0136197			1.51187	0.018701			1.51208	0.00484288			1.51145	0.00541657			1.50895	-0.00886619
1.51895	0.0130311			1.51395	0.018023			1.51728	0.00998378			1.51895	0.0188276			1.51542	0.00599772			1.51895	0.0141785			1.51562	0.0105575			1.51728	0.0144169			1.51853	0.0187978			1.51875	0.0044629			1.51812	0.00642985			1.51562	-0.00865757
1.52562	0.0125691			1.52062	0.0182912			1.52395	0.0102445			1.52562	0.0194535			1.52208	0.0058189			1.52562	0.014022			1.52228	0.0103414			1.52395	0.0154898			1.5252	0.0189245			1.52542	0.00374764			1.52478	0.00756234			1.52228	-0.00794232
1.53228	0.0128746			1.52728	0.0181571			1.53062	0.0101328			1.53228	0.0201836			1.52875	0.00545382			1.53228	0.0144914			1.52895	0.0104383			1.53062	0.0166818			1.53187	0.0191703			1.53208	0.00241399			1.53145	0.0083074			1.52895	-0.00724196
1.53895	0.013411			1.53395	0.0180677			1.53728	0.0102594			1.53895	0.0208318			1.53542	0.00452995			1.53895	0.0154451			1.53562	0.0107437			1.53728	0.0178516			1.53853	0.0190288			1.53875	0.00114739			1.53812	0.00834465			1.53562	-0.0071004
1.54562	0.014171			1.54062	0.0182241			1.54395	0.0102147			1.54562	0.0210404			1.54208	0.00333041			1.54562	0.0163168			1.54228	0.0109449			1.54395	0.0186041			1.5452	0.0185221			1.54542	0.00100583			1.54478	0.00780821			1.54228	-0.00710785
1.55228	0.014998			1.54728	0.0180975			1.55062	0.0096634			1.55228	0.020735			1.54875	0.00249594			1.55228	0.0170842			1.54895	0.0106394			1.55062	0.0186861			1.55187	0.0176802			1.55208	0.00146031			1.55145	0.00688434			1.54895	-0.00672042
1.55895	0.0160113			1.55395	0.0175238			1.55728	0.00891089			1.55895	0.0200868			1.55542	0.00251085			1.55895	0.0174493			1.55562	0.00996888			1.55728	0.0182018			1.55853	0.0170767			1.55875	0.00185519			1.55812	0.00597537			1.55562	-0.00666082
1.56562	0.0167638			1.56062	0.0167713			1.56395	0.0083223			1.56562	0.0191107			1.56208	0.00323355			1.56562	0.0173002			1.56228	0.00929087			1.56395	0.0174716			1.5652	0.0168383			1.56542	0.00201911			1.56478	0.00506639			1.56228	-0.00698864
1.57228	0.0173151			1.56728	0.0158846			1.57062	0.00806153			1.57228	0.0181347			1.56875	0.00425428			1.57228	0.0165924			1.56895	0.00888109			1.57062	0.0167191			1.57187	0.0168383			1.57208	0.00232458			1.57145	0.00450015			1.56895	-0.0071004
1.57895	0.0177994			1.57395	0.0149161			1.57728	0.00761449			1.57895	0.0173524			1.57542	0.00531971			1.57895	0.0156686			1.57562	0.00867993			1.57728	0.0156313			1.57853	0.0172555			1.57875	0.00282377			1.57812	0.00472367			1.57562	-0.00674278
1.58562	0.018239			1.58062	0.0140145			1.58395	0.00698864			1.58562	0.0168383			1.58208	0.00650436			1.58562	0.0154004			1.58228	0.00861287			1.58395	0.0146031			1.5852	0.0180528			1.58542	0.00292063			1.58478	0.00545382			1.58228	-0.00634044
1.59228	0.0184998			1.58728	0.0136346			1.59062	0.00616908			1.59228	0.0167638			1.58875	0.00771135			1.59228	0.0156835			1.58895	0.00879914			1.59062	0.0139028			1.59187	0.0189096			1.59208	0.0025481			1.59145	0.00641495			1.58895	-0.00626594
1.59895	0.0184849			1.59395	0.0140369			1.59728	0.00552833			1.59895	0.0168979			1.59542	0.00846386			1.59895	0.0163838			1.59562	0.00934303			1.59728	0.0137761			1.59853	0.0191331			1.59875	0.00225008			1.59812	0.0070259			1.59562	-0.00625104
1.60562	0.0185072			1.60062	0.0146478			1.60395	0.00531226			1.60562	0.0172332			1.60208	0.00880659			1.60562	0.0172406			1.60228	0.00989437			1.60395	0.0137538			1.6052	0.0188276			1.60542	0.00242144			1.60478	0.00751764			1.60228	-0.00668317
1.61228	0.0185892			1.60728	0.0153482			1.61062	0.00566244			1.61228	0.0174493			1.60875	0.00908971			1.61228	0.017941			1.60895	0.0103414			1.61062	0.0136867			1.61187	0.0182986			1.61208	0.00274181			1.61145	0.00774115			1.60895	-0.0077188
1.61895	0.0182912			1.61395	0.0162944			1.61728	0.00633299			1.61895	0.0177473			1.61542	0.00971556			1.61895	0.0180975			1.61562	0.0106543			1.61728	0.0142381			1.61853	0.0178143			1.61875	0.00286102			1.61812	0.00704825			1.61562	-0.00888109
1.62562	0.0177547			1.62062	0.0175312			1.62395	0.0071153			1.62562	0.0182167			1.62208	0.0103489			1.62562	0.0175759			1.62228	0.0110343			1.62395	0.0152439			1.6252	0.0171885			1.62542	0.00295043			1.62478	0.00568479			1.62228	-0.00955164
1.63228	0.0171661			1.62728	0.0183806			1.63062	0.00831485			1.63228	0.0185296			1.62875	0.0105798			1.63228	0.0171736			1.62895	0.0113547			1.63062	0.0162572			1.63187	0.0165328			1.63208	0.00301003			1.63145	0.00420213			1.62895	-0.0095889
1.63895	0.0171214			1.63395	0.018239			1.63728	0.00976026			1.63895	0.0186488			1.63542	0.0104085			1.63895	0.0170916			1.63562	0.0114217			1.63728	0.0168234			1.63853	0.0158325			1.63875	0.00311434			1.63812	0.00338256			1.63562	-0.00930578
1.64562	0.0177026			1.64062	0.0178069			1.64395	0.0108108			1.64562	0.018537			1.64208	0.00984222			1.64562	0.0170097			1.64228	0.0114217			1.64395	0.0174642			1.6452	0.0150055			1.64542	0.00313669			1.64478	0.00330061			1.64228	-0.00862032
1.65228	0.0185072			1.64728	0.0178665			1.65062	0.0104904			1.65228	0.0187084			1.64875	0.0090301			1.65228	0.0166744			1.64895	0.0113621			1.65062	0.0183731			1.65187	0.0143647			1.65208	0.00339001			1.65145	0.0038594			1.64895	-0.00775605
1.65895	0.019215			1.65395	0.018239			1.65728	0.00938773			1.65895	0.0186712			1.65542	0.00820309			1.65895	0.0165179			1.65562	0.01131			1.65728	0.0187755			1.65853	0.0138506			1.65875	0.00400096			1.65812	0.0051111			1.65562	-0.00726432
1.66562	0.019528			1.66062	0.0184029			1.66395	0.00813603			1.66562	0.0181049			1.66208	0.00762194			1.66562	0.0165775			1.66228	0.0111982			1.66395	0.0187457			1.6652	0.0133961			1.66542	0.00465661			1.66478	0.00665337			1.66228	-0.00742078
1.67228	0.0194088			1.66728	0.0184104			1.67062	0.00695884			1.67228	0.0175014			1.66875	0.00728667			1.67228	0.016354			1.66895	0.0113323			1.67062	0.0186637			1.67187	0.0128374			1.67208	0.00535697			1.67145	0.00804663			1.66895	-0.00816584
1.67895	0.0185817			1.67395	0.0189692			1.67728	0.00591576			1.67895	0.0174046			1.67542	0.00695884			1.67895	0.0155121			1.67562	0.0119135			1.67728	0.0188723			1.67853	0.0125095			1.67875	0.00603497			1.67812	0.00882894			1.67562	-0.00908226
1.68562	0.017561			1.68062	0.0199005			1.68395	0.00510365			1.68562	0.0181794			1.68208	0.00680238			1.68562	0.0146851			1.68228	0.0126064			1.68395	0.0188649			1.6852	0.0124872			1.68542	0.00665337			1.68478	0.009045			1.68228	-0.00973046
1.69228	0.0170246			1.68728	0.0203326			1.69062	0.00504404			1.69228	0.0191182			1.68875	0.0070706			1.69228	0.0142753			1.68895	0.0130758			1.69062	0.0181645			1.69187	0.0124425			1.69208	0.00719726			1.69145	0.00888854			1.68895	-0.00990927
1.69895	0.0170097			1.69395	0.0199005			1.69728	0.00558048			1.69895	0.0200197			1.69542	0.00762194			1.69895	0.0139251			1.69562	0.0134036			1.69728	0.0171885			1.69853	0.0125244			1.69875	0.00744313			1.69812	0.00853837			1.69562	-0.00951439
1.70562	0.0172108			1.70062	0.0191331			1.70395	0.00672787			1.70562	0.0209659			1.70208	0.00798702			1.70562	0.0136122			1.70228	0.0139251			1.70395	0.015974			1.7052	0.0126362			1.70542	0.00742823			1.70478	0.00816584			1.70228	-0.00894815
1.71228	0.0175387			1.70728	0.0186563			1.71062	0.00817329			1.71228	0.0220016			1.70875	0.00778586			1.71228	0.0133961			1.70895	0.0145882			1.71062	0.0148416			1.71187	0.0128224			1.71208	0.00717491			1.71145	0.00762939			1.70895	-0.00847876
1.71895	0.0179559			1.71395	0.0184104			1.71728	0.0095591			1.71895	0.0227243			1.71542	0.00750273			1.71895	0.0135675			1.71562	0.0147447			1.71728	0.0138357			1.71853	0.0130534			1.71875	0.0064671			1.71812	0.0070706			1.71562	-0.00795722
1.72562	0.0178814			1.72062	0.018239			1.72395	0.0111312			1.72562	0.0228733			1.72208	0.00727177			1.72562	0.0138059			1.72228	0.0141859			1.72395	0.0133142			1.7252	0.013411			1.72542	0.00555068			1.72478	0.00657886			1.72228	-0.00752509
1.73228	0.0168905			1.72728	0.0184774			1.73062	0.0124127			1.73228	0.0228807			1.72875	0.00676513			1.73228	0.0138804			1.72895	0.0132024			1.73062	0.0135526			1.73187	0.0138506			1.73208	0.00455976			1.73145	0.00617653			1.72895	-0.00733137
1.73895	0.0158101			1.73395	0.0192299			1.73728	0.0131726			1.73895	0.0231042			1.73542	0.00599027			1.73895	0.0137165			1.73562	0.0122264			1.73728	0.0140443			1.73853	0.014402			1.73875	0.00392646			1.73812	0.00562519			1.73562	-0.00751019
1.74562	0.0151247			1.74062	0.0201762			1.74395	0.0125468			1.74562	0.023596			1.74208	0.00543892			1.74562	0.0135675			1.74228	0.0111386			1.74395	0.0146776			1.7452	0.015378			1.74542	0.00402331			1.74478	0.00506639			1.74228	-0.00785291
1.75228	0.0148788			1.74728	0.0207573			1.75062	0.0109971			1.75228	0.0234917			1.74875	0.0057891			1.75228	0.0136346			1.74895	0.00996143			1.75062	0.0150278			1.75187	0.0167042			1.75208	0.00430644			1.75145	0.00504404			1.74895	-0.00800192
1.75895	0.0150278			1.75395	0.0207946			1.75728	0.00942498			1.75895	0.0227764			1.75542	0.00664592			1.75895	0.0137985			1.75562	0.00927597			1.75728	0.0152141			1.75853	0.0175685			1.75875	0.00427663			1.75812	0.00566989			1.75562	-0.00818074
1.76562	0.0156388			1.76062	0.020355			1.76395	0.00847131			1.76562	0.0215992			1.76208	0.00745803			1.76562	0.0137091			1.76228	0.00948459			1.76395	0.0150502			1.7652	0.0176951			1.76542	0.00398606			1.76478	0.00647455			1.76228	-0.00850856
1.77228	0.0164881			1.76728	0.0196248			1.77062	0.00858307			1.77228	0.0202507			1.76875	0.00847876			1.77228	0.013195			1.76895	0.0102893			1.77062	0.0146329			1.77187	0.0173971			1.77208	0.00350922			1.77145	0.0069961			1.76895	-0.00859052
1.77895	0.0170916			1.77395	0.0189915			1.77728	0.00914186			1.77895	0.0187308			1.77542	0.00955909			1.77895	0.0129193			1.77562	0.0111163			1.77728	0.0144765			1.77853	0.0170991			1.77875	0.00321865			1.77812	0.00737607			1.77562	-0.00847131
1.78562	0.0173673			1.78062	0.0184849			1.78395	0.0100732			1.78562	0.0171885			1.78208	0.0104457			1.78562	0.0131503			1.78228	0.0120401			1.78395	0.0146553			1.7852	0.0166819			1.78542	0.00314415			1.78478	0.00749528			1.78228	-0.0083521
1.79228	0.0176802			1.78728	0.0181571			1.79062	0.011228			1.79228	0.0164062			1.78875	0.0106543			1.79228	0.0139922			1.78895	0.0131801			1.79062	0.0153258			1.79187	0.016205			1.79208	0.00349432			1.79145	0.00745803			1.78895	-0.00853837
1.79895	0.0179783			1.79395	0.0181571			1.79728	0.011988			1.79895	0.0165626			1.79542	0.0104681			1.79895	0.0149086			1.79562	0.0139028			1.79728	0.0160709			1.79853	0.0159964			1.79875	0.00420213			1.79812	0.00709295			1.79562	-0.0089407
1.80562	0.0180975			1.80062	0.0183433			1.80395	0.0120252			1.80562	0.0176057			1.80208	0.010252			1.80562	0.0156164			1.80228	0.0139549			1.80395	0.0166595			1.8052	0.0160709			1.80542	0.00484288			1.80478	0.00687689			1.80228	-0.00899285
1.81228	0.0181645			1.80728	0.0185072			1.81062	0.0114739			1.81228	0.01885			1.80875	0.00993162			1.81228	0.0162423			1.80895	0.0136867			1.81062	0.0169128			1.81187	0.0163913			1.81208	0.00572205			1.81145	0.00663847			1.80895	-0.00902265
1.81895	0.0182614			1.81395	0.0186339			1.81728	0.0111833			1.81895	0.0201166			1.81542	0.00973046			1.81895	0.0167638			1.81562	0.0134036			1.81728	0.017032			1.81853	0.0163391			1.81875	0.00655651			1.81812	0.00633299			1.81562	-0.00946969
1.82562	0.018321			1.82062	0.0191405			1.82395	0.0111833			1.82562	0.0208467			1.82208	0.00958145			1.82562	0.0169054			1.82228	0.0127628			1.82395	0.0174046			1.8252	0.0157431			1.82542	0.00689179			1.82478	0.00624359			1.82228	-0.0102893
1.83228	0.0182539			1.82728	0.0197515			1.83062	0.0108257			1.83228	0.0210106			1.82875	0.00945479			1.83228	0.0162944			1.82895	0.0113696			1.83062	0.0177845			1.83187	0.0147596			1.83208	0.00660866			1.83145	0.00626594			1.82895	-0.0110865
1.83895	0.0178739			1.83395	0.0199527			1.83728	0.0102222			1.83895	0.0206605			1.83542	0.00947714			1.83895	0.015527			1.83562	0.00974536			1.83728	0.0178739			1.83853	0.0140294			1.83875	0.00619143			1.83812	0.00616163			1.83562	-0.0115111
1.84562	0.0171587			1.84062	0.0201166			1.84395	0.00943243			1.84562	0.0199154			1.84208	0.00991672			1.84562	0.0150949			1.84228	0.00847131			1.84395	0.0177324			1.8452	0.0139996			1.84542	0.00593811			1.84478	0.00561029			1.84228	-0.0122264
1.85228	0.0161305			1.84728	0.0205934			1.85062	0.00853836			1.85228	0.0190735			1.84875	0.0106022			1.85228	0.0152588			1.84895	0.0077039			1.85062	0.0173971			1.85187	0.0141412			1.85208	0.00543147			1.85145	0.00520796			1.84895	-0.0132844
1.85895	0.015147			1.85395	0.021033			1.85728	0.00733137			1.85895	0.0182092			1.85542	0.0105277			1.85895	0.0152737			1.85562	0.00736862			1.85728	0.0167266			1.85853	0.0147372			1.85875	0.00493973			1.85812	0.00540167			1.85562	-0.0138208
1.86562	0.0143871			1.86062	0.0207424			1.86395	0.00645965			1.86562	0.0176653			1.86208	0.0096336			1.86562	0.0149161			1.86228	0.00745803			1.86395	0.015676			1.8652	0.0159517			1.86542	0.00479817			1.86478	0.00582635			1.86228	-0.0139251
1.87228	0.0139102			1.86728	0.019975			1.87062	0.00660121			1.87228	0.0173748			1.86875	0.00862777			1.87228	0.0145137			1.86895	0.00793487			1.87062	0.0146031			1.87187	0.0173673			1.87208	0.00507385			1.87145	0.00613183			1.86895	-0.0139251
1.87895	0.0138432			1.87395	0.0196472			1.87728	0.00748038			1.87895	0.0172406			1.87542	0.00797212			1.87895	0.0141859			1.87562	0.00884384			1.87728	0.0141636			1.87853	0.0184029			1.87875	0.00535697			1.87812	0.00657886			1.87562	-0.0141189
1.88562	0.0142381			1.88062	0.0197813			1.88395	0.00857562			1.88562	0.0168979			1.88208	0.00743568			1.88562	0.0140965			1.88228	0.0095889			1.88395	0.0144914			1.8852	0.0184625			1.88542	0.00523031			1.88478	0.00701845			1.88228	-0.0139102
1.89228	0.0148565			1.88728	0.0199825			1.89062	0.00939518			1.89228	0.016503			1.88875	0.00695139			1.89228	0.0142679			1.88895	0.010252			1.89062	0.0153556			1.89187	0.0180677			1.89208	0.00491738			1.89145	0.00718981			1.88895	-0.0133961
1.89895	0.015296			1.89395	0.0198707			1.89728	0.00998378			1.89895	0.016205			1.89542	0.00707805			1.89895	0.0151619			1.89562	0.010632			1.89728	0.0163838			1.89853	0.0174567			1.89875	0.00428408			1.89812	0.0070557			1.89562	-0.0130534
1.90562	0.015758			1.90062	0.0197589			1.90395	0.0103414			1.90562	0.016138			1.90208	0.007689			1.90562	0.0164136			1.90228	0.0106916			1.90395	0.0170022			1.9052	0.0170395			1.90542	0.00348687			1.90478	0.00685453			1.90228	-0.0127405
1.91228	0.0162944			1.90728	0.0199601			1.91062	0.0102296			1.91228	0.0162646			1.90875	0.00806898			1.91228	0.0171661			1.90895	0.0103861			1.91062	0.0172928			1.91187	0.0171438			1.91208	0.002563			1.91145	0.00654161			1.90895	-0.0119805
1.91895	0.0165477			1.91395	0.0201762			1.91728	0.0101253			1.91895	0.0166968			1.91542	0.00794232			1.91895	0.0172779			1.91562	0.00979006			1.91728	0.0171661			1.91853	0.0174642			1.91875	0.00171363			1.91812	0.00602007			1.91562	-0.0108927
1.92562	0.0163391			1.92062	0.0201315			1.92395	0.0101551			1.92562	0.0176951			1.92208	0.00780821			1.92562	0.0170618			1.92228	0.00958145			1.92395	0.0167564			1.9252	0.0180751			1.92542	0.00162423			1.92478	0.00593066			1.92228	-0.00995398
1.93228	0.0159964			1.92728	0.0200197			1.93062	0.0104159			1.93228	0.0188574			1.92875	0.00800192			1.93228	0.0168458			1.92895	0.00937283			1.93062	0.0161678			1.93187	0.01885			1.93208	0.00223517			1.93145	0.00630319			1.92895	-0.00918657
1.93895	0.0161305			1.93395	0.0206158			1.93728	0.0104532			1.93895	0.0200346			1.93542	0.00821799			1.93895	0.0165626			1.93562	0.00928342			1.93728	0.01546			1.93853	0.0191107			1.93875	0.00332296			1.93812	0.00648946			1.93562	-0.00873208
1.94562	0.0162944			1.94062	0.0218228			1.94395	0.0102594			1.94562	0.0213757			1.94208	0.00855327			1.94562	0.0164583			1.94228	0.00935793			1.94395	0.0151694			1.9452	0.0185966			1.94542	0.00416487			1.94478	0.00619888			1.94228	-0.00831485
1.95228	0.0160038			1.94728	0.0230893			1.95062	0.0103712			1.95228	0.022918			1.94875	0.00923127			1.95228	0.0167638			1.94895	0.0100508			1.95062	0.015147			1.95187	0.0174642			1.95208	0.00461936			1.95145	0.00599027			1.94895	-0.00846386
1.95895	0.0155345			1.95395	0.0236332			1.95728	0.0105947			1.95895	0.0239462			1.95542	0.00980496			1.95895	0.0174865			1.95562	0.0107959			1.95728	0.0155047			1.95853	0.0164136			1.95875	0.0050813			1.95812	0.00619143			1.95562	-0.00905991
1.96562	0.015378			1.96062	0.0235215			1.96395	0.0106171			1.96562	0.0241175			1.96208	0.00955909			1.96562	0.0180975			1.96228	0.0113249			1.96395	0.016056			1.9652	0.0154674			1.96542	0.00549853			1.96478	0.00641495			1.96228	-0.0100285
1.97228	0.0154004			1.96728	0.0228882			1.97062	0.0102222			1.97228	0.0237003			1.96875	0.00856817			1.97228	0.0182539			1.96895	0.01169			1.97062	0.0165328			1.97187	0.0144616			1.97208	0.00585616			1.97145	0.0063628			1.96895	-0.0110418
1.97895	0.0149757			1.97395	0.0215992			1.97728	0.00980496			1.97895	0.0231564			1.97542	0.0077337			1.97895	0.0177622			1.97562	0.0118315			1.97728	0.0168607			1.97853	0.0137538			1.97875	0.00613183			1.97812	0.00634044			1.97562	-0.0115782
1.98562	0.0142753			1.98062	0.0198334			1.98395	0.0095889			1.98562	0.0224784			1.98208	0.00750273			1.98562	0.0169724			1.98228	0.0117719			1.98395	0.0167862			1.9852	0.0131354			1.98542	0.00663102			1.98478	0.00650436			1.98228	-0.0119507
1.99228	0.0138432			1.98728	0.0177696			1.99062	0.00937283			1.99228	0.021562			1.98875	0.00744313			1.99228	0.0161901			1.98895	0.0113025			1.99062	0.0168979			1.99187	0.0128821			1.99208	0.00754744			1.99145	0.00671297			1.98895	-0.0121668
1.99895	0.0136495			1.99395	0.0160486			1.99728	0.00929832			1.99895	0.020884			1.99542	0.00746548			1.99895	0.0155792			1.99562	0.0109524			1.99728	0.0173002			1.99853	0.0128746			1.99875	0.00799447			1.99812	0.00669062			1.99562	-0.0123158
2.00562	0.0134036			2.00062	0.0151545			2.00395	0.00932068			2.00562	0.020653			2.00208	0.00745803			2.00562	0.0152662			2.00228	0.0105575			2.00395	0.0175163			2.0052	0.0132844			2.00542	0.00750273			2.00478	0.00641495			2.00228	-0.0122264
2.01228	0.0132322			2.00728	0.0152811			2.01062	0.00950694			2.01228	0.0207275			2.00875	0.00732392			2.01228	0.0152141			2.00895	0.0101402			2.01062	0.0175014			2.01187	0.0138208			2.01208	0.0063628			2.01145	0.00634789			2.00895	-0.0118241
2.01895	0.0134557			2.01395	0.0163093			2.01728	0.00981241			2.01895	0.0205562			2.01542	0.00716001			2.01895	0.0154749			2.01562	0.0100285			2.01728	0.0176281			2.01853	0.0142232			2.01875	0.00543892			2.01812	0.00656396			2.01562	-0.0113025
2.02562	0.0139028			2.02062	0.0178367			2.02395	0.00992417			2.02562	0.0203252			2.02208	0.00667572			2.02562	0.0159144			2.02228	0.0102371			2.02395	0.0182688			2.0252	0.0147745			2.02542	0.00484288			2.02478	0.00669807			2.02228	-0.0107959
2.03228	0.0143051			2.02728	0.0194162			2.03062	0.00981987			2.03228	0.0205711			2.02875	0.00638515			2.03228	0.016436			2.02895	0.0105128			2.03062	0.0186712			2.03187	0.0153854			2.03208	0.00431389			2.03145	0.00620633			2.02895	-0.0104383
2.03895	0.0150129			2.03395	0.0207722			2.03728	0.00933558			2.03895	0.0214055			2.03542	0.0063628			2.03895	0.0165179			2.03562	0.0106618			2.03728	0.0183582			2.03853	0.0158027			2.03875	0.00435114			2.03812	0.0050813			2.03562	-0.0103861
2.04562	0.0162348			2.04062	0.0212789			2.04395	0.00905991			2.04562	0.022307			2.04208	0.00686198			2.04562	0.0160486			2.04228	0.010632			2.04395	0.0177547			2.0452	0.0156462			2.04542	0.0051409			2.04478	0.00401586			2.04228	-0.0105575
2.05228	0.0175908			2.04728	0.0211			2.05062	0.00929087			2.05228	0.0231117			2.04875	0.00777096			2.05228	0.015229			2.04895	0.010699			2.05062	0.0176653			2.05187	0.0155047			2.05208	0.00621378			2.05145	0.00342727			2.04895	-0.0105947
2.05895	0.0184476			2.05395	0.0204369			2.05728	0.00991672			2.05895	0.024274			2.05542	0.00840425			2.05895	0.0145584			2.05562	0.0104979			2.05728	0.0177696			2.05853	0.0157356			2.05875	0.00669062			2.05812	0.00333786			2.05562	-0.0105575
2.06562	0.0186488			2.06062	0.0197962			2.06395	0.010781			2.06562	0.0255033			2.06208	0.00853091			2.06562	0.0140369			2.06228	0.00990927			2.06395	0.0176504			2.0652	0.0160486			2.06542	0.00683218			2.06478	0.00383705			2.06228	-0.0103861
2.07228	0.0186637			2.06728	0.0195652			2.07062	0.0115633			2.07228	0.0259355			2.06875	0.00813603			2.07228	0.0137165			2.06895	0.00914186			2.07062	0.0173971			2.07187	0.0158995			2.07208	0.00722706			2.07145	0.00464171			2.06895	-0.00994653
2.07895	0.0185668			2.07395	0.0198931			2.07728	0.0122786			2.07895	0.0253171			2.07542	0.0077039			2.07895	0.0136867			2.07562	0.0083223			2.07728	0.0174865			2.07853	0.015676			2.07875	0.00755489			2.07812	0.00576675			2.07562	-0.00890344
2.08562	0.0185221			2.08062	0.0209063			2.08395	0.0126809			2.08562	0.0246838			2.08208	0.00760704			2.08562	0.0138432			2.08228	0.00815094			2.08395	0.018239			2.0852	0.0158325			2.08542	0.00736862			2.08478	0.00656396			2.08228	-0.0077188
2.09228	0.0186488			2.08728	0.0217855			2.09062	0.012584			2.09228	0.0245795			2.08875	0.00774115			2.09228	0.0141338			2.08895	0.00863522			2.09062	0.0190511			2.09187	0.0161082			2.09208	0.00683218			2.09145	0.00687689			2.08895	-0.00689179
2.09895	0.0188425			2.09395	0.022091			2.09728	0.0123084			2.09895	0.024423			2.09542	0.00802428			2.09895	0.01432			2.09562	0.00951439			2.09728	0.0197068			2.09853	0.0162423			2.09875	0.0063926			2.09812	0.00680983			2.09562	-0.00654906
2.10562	0.0190586			2.10062	0.022009			2.10395	0.012368			2.10562	0.0242293			2.10208	0.00865757			2.10562	0.0142232			2.10228	0.010699			2.10395	0.0202358			2.1052	0.0165179			2.10542	0.00618398			2.10478	0.00638515			2.10228	-0.00660121
2.11228	0.0187531			2.10728	0.0219643			2.11062	0.0129119			2.11228	0.0244826			2.10875	0.00925362			2.11228	0.0137687			2.10895	0.0120178			2.11062	0.0203028			2.11187	0.0171736			2.11208	0.00582635			2.11145	0.00602007			2.10895	-0.00703335
2.11895	0.0178441			2.11395	0.0221655			2.11728	0.0136197			2.11895	0.0254586			2.11542	0.00946969			2.11895	0.0132695			2.11562	0.0131056			2.11728	0.0199527			2.11853	0.0177845			2.11875	0.00558048			2.11812	0.00581145			2.11562	-0.00783056
2.12562	0.0162721			2.12062	0.0219941			2.12395	0.0141934			2.12562	0.0262856			2.12208	0.00938028			2.12562	0.0132397			2.12228	0.0132546			2.12395	0.0191927			2.1252	0.017859			2.12542	0.00591576			2.12478	0.00588596			2.12228	-0.00849366
2.13228	0.0146776			2.12728	0.0215471			2.13062	0.0148639			2.13228	0.0263974			2.12875	0.00913441			2.13228	0.0134856			2.12895	0.0125989			2.13062	0.0183284			2.13187	0.0175536			2.13208	0.00660866			2.13145	0.00622869			2.12895	-0.00916421
2.13895	0.0138208			2.13395	0.021413			2.13728	0.0155643			2.13895	0.0261292			2.13542	0.00923872			2.13895	0.0138804			2.13562	0.0120699			2.13728	0.0174716			2.13853	0.0173673			2.13875	0.00704825			2.13812	0.0064671			2.13562	-0.00986457
2.14562	0.0140816			2.14062	0.0217482			2.14395	0.0158474			2.14562	0.0253916			2.14208	0.00929832			2.14562	0.0143349			2.14228	0.0117198			2.14395	0.0168234			2.1452	0.017263			2.14542	0.00662357			2.14478	0.00678003			2.14228	-0.010334
2.15228	0.0150129			2.14728	0.0221804			2.15062	0.0155196			2.15228	0.0242814			2.14875	0.00934303			2.15228	0.0148192			2.14895	0.0113249			2.15062	0.017032			2.15187	0.0168458			2.15208	0.00558794			2.15145	0.00721961			2.14895	-0.0105128
2.15895	0.0159964			2.15395	0.0220463			2.15728	0.0146925			2.15895	0.0229552			2.15542	0.00929832			2.15895	0.0151917			2.15562	0.0113398			2.15728	0.0179335			2.15853	0.0161901			2.15875	0.00484288			2.15812	0.00791997			2.15562	-0.010483
2.16562	0.016652			2.16062	0.0217631			2.16395	0.0140294			2.16562	0.0219867			2.16208	0.00925362			2.16562	0.0155047			2.16228	0.0118911			2.16395	0.018999			2.1652	0.0158474			2.16542	0.00461191			2.16478	0.00885874			2.16228	-0.0104979
2.17228	0.0169277			2.16728	0.0220984			2.17062	0.0134408			2.17228	0.0215322			2.16875	0.00950694			2.17228	0.0157654			2.16895	0.0125915			2.17062	0.0196919			2.17187	0.0156909			2.17208	0.0045076			2.17145	0.00914186			2.16895	-0.0102594
2.17895	0.0167564			2.17395	0.0231862			2.17728	0.0127777			2.17895	0.0214949			2.17542	0.00969321			2.17895	0.0158474			2.17562	0.0128075			2.17728	0.0200719			2.17853	0.0152439			2.17875	0.00432879			2.17812	0.00882149			2.17562	-0.00954419
2.18562	0.0160858			2.18062	0.0244528			2.18395	0.0120029			2.18562	0.0217929			2.18208	0.00958145			2.18562	0.0155792			2.18228	0.0127628			2.18395	0.0199899			2.1852	0.014849			2.18542	0.00419468			2.18478	0.00819564			2.18228	-0.00859797
2.19228	0.0155196			2.18728	0.025481			2.19062	0.011161			2.19228	0.0225082			2.18875	0.00961125			2.19228	0.0152141			2.18895	0.0128224			2.19062	0.0195652			2.19187	0.0150353			2.19208	0.00441074			2.19145	0.00791997			2.18895	-0.00738353
2.19895	0.0154153			2.19395	0.0262335			2.19728	0.0107363			2.19895	0.0232682			2.19542	0.00994653			2.19895	0.0149757			2.19562	0.0128075			2.19728	0.0188947			2.19853	0.0156164			2.19875	0.0044778			2.19812	0.00779331			2.19562	-0.00605732
2.20562	0.0160187			2.20062	0.0268668			2.20395	0.0105277			2.20562	0.0235587			2.20208	0.0102222			2.20562	0.0147298			2.20228	0.012733			2.20395	0.0181422			2.2052	0.0157431			2.20542	0.00407547			2.20478	0.00744313			2.20228	-0.00524521
2.21228	0.0168979			2.20728	0.0268593			2.21062	0.0106022			2.21228	0.023216			2.20875	0.00988692			2.21228	0.0146031			2.20895	0.012733			2.21062	0.0175387			2.21187	0.0156462			2.21208	0.00370294			2.21145	0.00741333			2.20895	-0.00528991
2.21895	0.01771			2.21395	0.0260547			2.21728	0.0107139			2.21895	0.0225976			2.21542	0.00911206			2.21895	0.0145659			2.21562	0.012733			2.21728	0.0169352			2.21853	0.0160187			2.21875	0.00365078			2.21812	0.00763685			2.21562	-0.00605732
2.22562	0.0181571			2.22062	0.0245944			2.22395	0.0108257			2.22562	0.022158			2.22208	0.00867993			2.22562	0.0149459			2.22228	0.0130087			2.22395	0.0167266			2.2252	0.0165775			2.22542	0.00414997			2.22478	0.00779331			2.22228	-0.0070855
2.23228	0.0182465			2.22728	0.0231043			2.23062	0.0113249			2.23228	0.0218898			2.22875	0.00855327			2.23228	0.0157803			2.22895	0.0137761			2.23062	0.0168011			2.23187	0.0167862			2.23208	0.00474602			2.23145	0.00745803			2.22895	-0.00826269
2.23895	0.0182018			2.23395	0.0220388			2.23728	0.012137			2.23895	0.0217184			2.23542	0.00860542			2.23895	0.0168756			2.23562	0.0146329			2.23728	0.0170469			2.23853	0.0167787			2.23875	0.00485778			2.23812	0.00721216			2.23562	-0.00968575
2.24562	0.0179559			2.24062	0.0214279			2.24395	0.0128523			2.24562	0.0216439			2.24208	0.00849366			2.24562	0.0176728			2.24228	0.0152439			2.24395	0.0173748			2.2452	0.0171363			2.24542	0.00464171			2.24478	0.00744313			2.24228	-0.0106916
2.25228	0.0177398			2.24728	0.0210106			2.25062	0.0133961			2.25228	0.0218078			2.24875	0.00869483			2.25228	0.0179484			2.24895	0.0151992			2.25062	0.0179037			2.25187	0.0178963			2.25208	0.00458956			2.25145	0.00789016			2.24895	-0.0110567
2.25895	0.0177696			2.25395	0.020273			2.25728	0.014253			2.25895	0.0222772			2.25542	0.00940263			2.25895	0.0180975			2.25562	0.0147074			2.25728	0.019148			2.25853	0.0181273			2.25875	0.00514835			2.25812	0.00841171			2.25562	-0.0108108
2.26562	0.0182539			2.26062	0.0195205			2.26395	0.0156239			2.26562	0.0230446			2.26208	0.0103116			2.26562	0.0181645			2.26228	0.0136495			2.26395	0.0205338			2.2652	0.0178367			2.26542	0.00575185			2.26478	0.00907481			2.26228	-0.0105128
2.27228	0.0188053			2.26728	0.0190735			2.27062	0.016965			2.27228	0.0239089			2.26875	0.0109002			2.27228	0.0178516			2.26895	0.0122637			2.27062	0.0214353			2.27187	0.0172183			2.27208	0.00604987			2.27145	0.00982732			2.26895	-0.0103042
2.27895	0.0192523			2.27395	0.018999			2.27728	0.0179708			2.27895	0.0247359			2.27542	0.0110418			2.27895	0.0170395			2.27562	0.0112802			2.27728	0.0216588			2.27853	0.0165775			2.27875	0.0064373			2.27812	0.00982732			2.27562	-0.00999868
2.28562	0.019446			2.28062	0.0189319			2.28395	0.0187233			2.28562	0.0254884			2.28208	0.0113249			2.28562	0.0163466			2.28228	0.0107065			2.28395	0.0215918			2.2852	0.0157952			2.28542	0.00675023			2.28478	0.00902265			2.28228	-0.00989437
2.29228	0.0192896			2.28728	0.0188425			2.29062	0.019066			2.29228	0.0260174			2.28875	0.0115857			2.29228	0.0159144			2.28895	0.0104308			2.29062	0.0215769			2.29187	0.0146776			2.29208	0.00693649			2.29145	0.00821799			2.28895	-0.00990182
2.29895	0.0188723			2.29395	0.0192598			2.29728	0.0187233			2.29895	0.0259876			2.29542	0.0114217			2.29895	0.015378			2.29562	0.0105202			2.29728	0.0213981			2.29853	0.0139549			2.29875	0.00683218			2.29812	0.00797212			2.29562	-0.010252
2.30562	0.0185817			2.30062	0.0200868			2.30395	0.0178069			2.30562	0.0250489			2.30208	0.010781			2.30562	0.0146702			2.30228	0.0112727			2.30395	0.0211224			2.3052	0.0138283			2.30542	0.007011			2.30478	0.00800192			2.30228	-0.0103787
2.31228	0.0186414			2.30728	0.0211			2.31062	0.0165999			2.31228	0.0235587			2.30875	0.0101551			2.31228	0.0139698			2.30895	0.012517			2.31062	0.0209287			2.31187	0.0143126			2.31208	0.00737607			2.31145	0.00795722			2.30895	-0.0103563
2.31895	0.0188872			2.31395	0.0217184			2.31728	0.01508			2.31895	0.0222176			2.31542	0.00988692			2.31895	0.0138059			2.31562	0.0133291			2.31728	0.0207797			2.31853	0.0146851			2.31875	0.00748038			2.31812	0.00824034			2.31562	-0.0101402
2.32562	0.0193119			2.32062	0.0218078			2.32395	0.0136942			2.32562	0.0216067			2.32208	0.00952184			2.32562	0.0141189			2.32228	0.0135526			2.32395	0.0207573			2.3252	0.0147596			2.32542	0.00741333			2.32478	0.00879169			2.32228	-0.00990182
2.33228	0.019975			2.32728	0.0215918			2.33062	0.0129044			2.33228	0.0215843			2.32875	0.00880659			2.33228	0.0147149			2.32895	0.0136569			2.33062	0.0204891			2.33187	0.0150874			2.33208	0.00685453			2.33145	0.0089407			2.32895	-0.00972301
2.33895	0.0205785			2.33395	0.0213385			2.33728	0.0126585			2.33895	0.0219345			2.33542	0.00828505			2.33895	0.0152513			2.33562	0.0136793			2.33728	0.0200421			2.33853	0.0156984			2.33875	0.00585616			2.33812	0.00854582			2.33562	-0.00937283
2.34562	0.0208691			2.34062	0.0212714			2.34395	0.0128299			2.34562	0.0226349			2.34208	0.00800192			2.34562	0.0155047			2.34228	0.0133216			2.34395	0.0194013			2.3452	0.0163019			2.34542	0.00452995			2.34478	0.00819564			2.34228	-0.00908226
2.35228	0.0210255			2.34728	0.021182			2.35062	0.0128746			2.35228	0.0234991			2.34875	0.00799447			2.35228	0.0153929			2.34895	0.0121295			2.35062	0.0187159			2.35187	0.0168085			2.35208	0.00341982			2.35145	0.00806153			2.34895	-0.00879914
2.35895	0.0210255			2.35395	0.0215024			2.35728	0.0128523			2.35895	0.0241175			2.35542	0.00831485			2.35895	0.0146851			2.35562	0.0107586			2.35728	0.0184104			2.35853	0.0174344			2.35875	0.00292063			2.35812	0.00797212			2.35562	-0.00867993
2.36562	0.0207871			2.36062	0.022538			2.36395	0.012666			2.36562	0.0240132			2.36208	0.00938773			2.36562	0.0136048			2.36228	0.00968575			2.36395	0.0183582			2.3652	0.0182688			2.36542	0.00297278			2.36478	0.007689			2.36228	-0.0082925
2.37228	0.0199825			2.36728	0.0240654			2.37062	0.0126064			2.37228	0.023596			2.36875	0.0109822			2.37228	0.0126213			2.36895	0.00926852			2.37062	0.0185817			2.37187	0.0187606			2.37208	0.00347197			2.37145	0.00721961			2.36895	-0.00761449
2.37895	0.0191033			2.37395	0.0252128			2.37728	0.0129268			2.37895	0.0233129			2.37542	0.0123009			2.37895	0.0123158			2.37562	0.00975281			2.37728	0.0185072			2.37853	0.0187531			2.37875	0.00439584			2.37812	0.0063926			2.37562	-0.00698864
2.38562	0.0182912			2.38062	0.0256598			2.38395	0.0132769			2.38562	0.0234395			2.38208	0.0133067			2.38562	0.0127107			2.38228	0.0109375			2.38395	0.0183508			2.3852	0.0185892			2.38542	0.00569969			2.38478	0.005126			2.38228	-0.00704825
2.39228	0.0178888			2.38728	0.0258386			2.39062	0.0137091			2.39228	0.0234693			2.38875	0.0141338			2.39228	0.0136569			2.38895	0.0127256			2.39062	0.0183806			2.39187	0.0184029			2.39208	0.00692159			2.39145	0.00412017			2.38895	-0.00778586
2.39895	0.0177473			2.39395	0.0258163			2.39728	0.0142753			2.39895	0.0232011			2.39542	0.0147074			2.39895	0.0148192			2.39562	0.0147372			2.39728	0.0186935			2.39853	0.018172			2.39875	0.00769645			2.39812	0.00363588			2.39562	-0.00877678
2.40562	0.0176653			2.40062	0.0254363			2.40395	0.0148639			2.40562	0.0229552			2.40208	0.0145361			2.40562	0.0156537			2.40228	0.0165477			2.40395	0.0187084			2.4052	0.01809			2.40542	0.0077039			2.40478	0.00368804			2.40228	-0.0096485
2.41228	0.0177026			2.40728	0.0247806			2.41062	0.0151172			2.41228	0.0229403			2.40875	0.0140071			2.41228	0.0159144			2.40895	0.0176877			2.41062	0.0184327			2.41187	0.0183731			2.41208	0.00745803			2.41145	0.00397861			2.40895	-0.0101849
2.41895	0.0178814			2.41395	0.0241995			2.41728	0.0147372			2.41895	0.0230595			2.41542	0.0135899			2.41895	0.0156984			2.41562	0.0178814			2.41728	0.0183284			2.41853	0.0188723			2.41875	0.00716746			2.41812	0.00469387			2.41562	-0.0108331
2.42562	0.0181869			2.42062	0.023745			2.42395	0.0139922			2.42562	0.0229627			2.42208	0.0133589			2.42562	0.0154376			2.42228	0.0173226			2.42395	0.0184178			2.4252	0.0188798			2.42542	0.00669807			2.42478	0.0057146			2.42228	-0.0113249
2.43228	0.0182688			2.42728	0.0231862			2.43062	0.0132993			2.43228	0.0230148			2.42875	0.0130758			2.43228	0.0153109			2.42895	0.0163317			2.43062	0.0186637			2.43187	0.0183508			2.43208	0.00628829			2.43145	0.00638515			2.42895	-0.0115335
2.43895	0.0183582			2.43395	0.022471			2.43728	0.0130013			2.43895	0.0235364			2.43542	0.0126734			2.43895	0.0153482			2.43562	0.0151992			2.43728	0.0187308			2.43853	0.0177473			2.43875	0.00616163			2.43812	0.00672042			2.43562	-0.0113547
2.44562	0.0188425			2.44062	0.022091			2.44395	0.0130162			2.44562	0.0242442			2.44208	0.0124201			2.44562	0.0158101			2.44228	0.0142753			2.44395	0.0191256			2.4452	0.0172034			2.44542	0.00663847			2.44478	0.00689924			2.44228	-0.0110641
2.45228	0.0196546			2.44728	0.0220239			2.45062	0.0130087			2.45228	0.0246838			2.44875	0.0119954			2.45228	0.0166595			2.44895	0.0136644			2.45062	0.0197738			2.45187	0.0166669			2.45208	0.00686944			2.45145	0.00730902			2.44895	-0.011161
2.45895	0.0201911			2.45395	0.0222474			2.45728	0.0131726			2.45895	0.0249743			2.45542	0.011459			2.45895	0.0171959			2.45562	0.0135228			2.45728	0.0206083			2.45853	0.0162944			2.45875	0.00648201			2.45812	0.00752509			2.45562	-0.0110492
2.46562	0.0203028			2.46062	0.0221804			2.46395	0.0136346			2.46562	0.0255331			2.46208	0.0110567			2.46562	0.0170916			2.46228	0.0135452			2.46395	0.0215992			2.4652	0.0164956			2.46542	0.00557303			2.46478	0.00780821			2.46228	-0.0107512
2.47228	0.0202283			2.46728	0.0217333			2.47062	0.0145361			2.47228	0.0259727			2.46875	0.0109598			2.47228	0.0163689			2.46895	0.0135824			2.47062	0.0224039			2.47187	0.0171214			2.47208	0.00474602			2.47145	0.00864267			2.46895	-0.0101849
2.47895	0.0200272			2.47395	0.02148			2.47728	0.0152886			2.47895	0.0256523			2.47542	0.010781			2.47895	0.0155568			2.47562	0.0132918			2.47728	0.022836			2.47853	0.0178963			2.47875	0.00422448			2.47812	0.00952184			2.47562	-0.0096634
2.48562	0.0195503			2.48062	0.0215322			2.48395	0.0160038			2.48562	0.024654			2.48208	0.0103787			2.48562	0.0148043			2.48228	0.0127926			2.48395	0.0228211			2.4852	0.0186861			2.48542	0.00403076			2.48478	0.00980496			2.48228	-0.00947714
2.49228	0.0189915			2.48728	0.0218451			2.49062	0.0167936			2.49228	0.0236258			2.48875	0.0101998			2.49228	0.0143945			2.48895	0.0123903			2.49062	0.0224262			2.49187	0.0192299			2.49208	0.00444055			2.49145	0.00970066			2.48895	-0.00935048
2.49895	0.0190362			2.49395	0.021778			2.49728	0.0175387			2.49895	0.0228882			2.49542	0.0101179			2.49895	0.0148043			2.49562	0.0116602			2.49728	0.0218153			2.49853	0.0194013			2.49875	0.00520796			2.49812	0.0100732			2.49562	-0.00936538
2.50562	0.0195429			2.50062	0.0214502			2.50395	0.0180751			2.50562	0.0222325			2.50208	0.00987202			2.50562	0.0157505			2.50228	0.0107288			2.50395	0.0208914			2.5052	0.0193194			2.50542	0.00598282			2.50478	0.0108108			2.50228	-0.00938028
2.51228	0.0200644			2.50728	0.0213832			2.51062	0.0181422			2.51228	0.0217408			2.50875	0.00914931			2.51228	0.0166893			2.50895	0.00977516			2.51062	0.0200197			2.51187	0.0194386			2.51208	0.00626594			2.51145	0.0111163			2.50895	-0.00937283
2.51895	0.0204146			2.51395	0.0215471			2.51728	0.0180528			2.51895	0.0218004			2.51542	0.00852346			2.51895	0.0171661			2.51562	0.00937283			2.51728	0.0194684			2.51853	0.019528			2.51875	0.00622123			2.51812	0.0109747			2.51562	-0.00938028
2.52562	0.0208914			2.52062	0.0216737			2.52395	0.0173897			2.52562	0.0223964			2.52208	0.00806898			2.52562	0.0171363			2.52228	0.0096187			2.52395	0.0191852			2.5252	0.019215			2.52542	0.00597537			2.52478	0.0107065			2.52228	-0.00946969
2.53228	0.0213906			2.52728	0.0214726			2.53062	0.0161082			2.53228	0.0231788			2.52875	0.0077337			2.53228	0.0167042			2.52895	0.0101849			2.53062	0.0194162			2.53187	0.0186637			2.53208	0.00558794			2.53145	0.0102371			2.52895	-0.00999123
2.53895	0.0215098			2.53395	0.0215471			2.53728	0.0147223			2.53895	0.0236183			2.53542	0.00774115			2.53895	0.0159815			2.53562	0.011161			2.53728	0.0200346			2.53853	0.0181049			2.53875	0.00530481			2.53812	0.00934303			2.53562	-0.0109673
2.54562	0.0212193			2.54062	0.0224411			2.54395	0.0134259			2.54562	0.0236407			2.54208	0.00793487			2.54562	0.0154376			2.54228	0.0124574			2.54395	0.0208169			2.5452	0.0175834			2.54542	0.00546873			2.54478	0.0083968			2.54228	-0.0117272
2.55228	0.0207126			2.54728	0.0235587			2.55062	0.0124797			2.55228	0.0232309			2.54875	0.0082776			2.55228	0.0153333			2.54895	0.014022			2.55062	0.0210255			2.55187	0.0168607			2.55208	0.0063926			2.55145	0.0077337			2.54895	-0.0120774
2.55895	0.0200942			2.55395	0.0241771			2.55728	0.0116006			2.55895	0.0227317			2.55542	0.00847131			2.55895	0.0155792			2.55562	0.0152215			2.55728	0.0206679			2.55853	0.0163391			2.55875	0.00779331			2.55812	0.00733137			2.55562	-0.0120476
2.56562	0.0195652			2.56062	0.0241026			2.56395	0.0114217			2.56562	0.0227466			2.56208	0.00882149			2.56562	0.0157431			2.56228	0.0153333			2.56395	0.0202283			2.5652	0.0166148			2.56542	0.00908226			2.56478	0.00738353			2.56228	-0.0120178
2.57228	0.0192299			2.56728	0.0241026			2.57062	0.0119656			2.57228	0.0234395			2.56875	0.00911951			2.57228	0.0156611			2.56895	0.0143498			2.57062	0.0195503			2.57187	0.0172853			2.57208	0.0100657			2.57145	0.00802428			2.56895	-0.0119805
2.57895	0.0191256			2.57395	0.0241995			2.57728	0.0126213			2.57895	0.0246987			2.57542	0.00887364			2.57895	0.0154302			2.57562	0.013046			2.57728	0.0186488			2.57853	0.0176206			2.57875	0.0103563			2.57812	0.0089407			2.57562	-0.0117421
2.58562	0.019215			2.58062	0.0239909			2.58395	0.0132024			2.58562	0.0259951			2.58208	0.00823289			2.58562	0.0150949			2.58228	0.0121146			2.58395	0.0176653			2.5852	0.0175089			2.58542	0.0101253			2.58478	0.00943989			2.58228	-0.0116751
2.59228	0.0193343			2.58728	0.0237226			2.59062	0.0134334			2.59228	0.0274256			2.58875	0.0077486			2.59228	0.0150651			2.58895	0.0112355			2.59062	0.0171438			2.59187	0.0173822			2.59208	0.00942498			2.59145	0.00926107			2.58895	-0.0117347
2.59895	0.0192374			2.59395	0.0237972			2.59728	0.0139177			2.59895	0.0287145			2.59542	0.00777096			2.59895	0.0156462			2.59562	0.0104606			2.59728	0.0170544			2.59853	0.0177622			2.59875	0.00863522			2.59812	0.00873953			2.59562	-0.0120476
2.60562	0.0186637			2.60062	0.0243858			2.60395	0.0145659			2.60562	0.029251			2.60208	0.00789762			2.60562	0.0168756			2.60228	0.0102222			2.60395	0.0170991			2.6052	0.0185072			2.60542	0.00818074			2.60478	0.00785291			2.60228	-0.0123754
2.61228	0.0178665			2.60728	0.0250265			2.61062	0.0152886			2.61228	0.0289381			2.60875	0.00790507			2.61228	0.0177845			2.60895	0.0105798			2.61062	0.0178516			2.61187	0.0195503			2.61208	0.00800192			2.61145	0.00677258			2.60895	-0.0126734
2.61895	0.0171959			2.61395	0.0255629			2.61728	0.0157207			2.61895	0.0281408			2.61542	0.00783801			2.61895	0.0182167			2.61562	0.011012			2.61728	0.0189394			2.61853	0.0203997			2.61875	0.0083521			2.61812	0.00602007			2.61562	-0.0127852
2.62562	0.0167117			2.62062	0.0261813			2.62395	0.0158325			2.62562	0.0275895			2.62208	0.00775605			2.62562	0.0185817			2.62228	0.0108853			2.62395	0.0198483			2.6252	0.020802			2.62542	0.00871718			2.62478	0.00593811			2.62228	-0.0122637
2.63228	0.0163689			2.62728	0.0263378			2.63062	0.0162274			2.63228	0.0272393			2.62875	0.00768155			2.63228	0.0190362			2.62895	0.0106767			2.63062	0.0202954			2.63187	0.0208989			2.63208	0.00861287			2.63145	0.00657886			2.62895	-0.0116229
2.63895	0.0161231			2.63395	0.025928			2.63728	0.0168905			2.63895	0.0271276			2.63542	0.00779331			2.63895	0.0191852			2.63562	0.0108927			2.63728	0.0204965			2.63853	0.020653			2.63875	0.00780821			2.63812	0.00738353			2.63562	-0.0111759
2.64562	0.0159144			2.64062	0.0254512			2.64395	0.0171363			2.64562	0.0273213			2.64208	0.00824034			2.64562	0.0189245			2.64228	0.0113472			2.64395	0.0207424			2.6452	0.0201464			2.64542	0.00668317			2.64478	0.00850111			2.64228	-0.0110716
2.65228	0.0158772			2.64728	0.0251457			2.65062	0.0164285			2.65228	0.0273734			2.64875	0.00891834			2.65228	0.0189245			2.64895	0.0121146			2.65062	0.0200346			2.65187	0.0194013			2.65208	0.00591576			2.65145	0.00992417			2.64895	-0.0109449
2.65895	0.0159293			2.65395	0.0248626			2.65728	0.0153929			2.65895	0.0269413			2.65542	0.00959635			2.65895	0.0187457			2.65562	0.0129119			2.65728	0.0186116			2.65853	0.0191703			2.65875	0.00570714			2.65812	0.0114292			2.65562	-0.0105426
2.66562	0.0162274			2.66062	0.0242814			2.66395	0.0144318			2.66562	0.0261962			2.66208	0.0102445			2.66562	0.0182092			2.66228	0.0137314			2.66395	0.0173226			2.6652	0.0194907			2.66542	0.00616908			2.66478	0.0122935			2.66228	-0.0102147
2.67228	0.0166744			2.66728	0.0239685			2.67062	0.0131875			2.67228	0.0256002			2.66875	0.0105873			2.67228	0.017263			2.66895	0.0142083			2.67062	0.0165254			2.67187	0.019826			2.67208	0.00724196			2.67145	0.0121891			2.66895	-0.0095889
2.67895	0.0171065			2.67395	0.0239164			2.67728	0.0115409			2.67895	0.0251755			2.67542	0.0105202			2.67895	0.0164658			2.67562	0.0140965			2.67728	0.0161603			2.67853	0.0196844			2.67875	0.00880659			2.67812	0.0117272			2.67562	-0.00879914
2.68562	0.0172108			2.68062	0.0238866			2.68395	0.010632			2.68562	0.0247508			2.68208	0.00986457			2.68562	0.0159889			2.68228	0.0137612			2.68395	0.0158697			2.6852	0.0189468			2.68542	0.010334			2.68478	0.0114292			2.68228	-0.00788271
2.69228	0.0168756			2.68728	0.0239238			2.69062	0.0112578			2.69228	0.024572			2.68875	0.00885129			2.69228	0.0157952			2.68895	0.0131056			2.69062	0.0159666			2.69187	0.0182241			2.69208	0.0114739			2.69145	0.0110343			2.68895	-0.0070259
2.69895	0.0160933			2.69395	0.0242591			2.69728	0.0126138			2.69895	0.0249967			2.69542	0.00819564			2.69895	0.015907			2.69562	0.012368			2.69728	0.0164956			2.69853	0.0175834			2.69875	0.0117198			2.69812	0.0100508			2.69562	-0.00622869
2.70562	0.0150576			2.70062	0.0247732			2.70395	0.0136122			2.70562	0.0256225			2.70208	0.00804663			2.70562	0.0158846			2.70228	0.0117794			2.70395	0.0170544			2.7052	0.0170842			2.70542	0.0111833			2.70478	0.00866503			2.70228	-0.00539422
2.71228	0.0141412			2.70728	0.0250936			2.71062	0.0143498			2.71228	0.0261366			2.70875	0.00817329			2.71228	0.0157207			2.70895	0.0118315			2.71062	0.0177622			2.71187	0.0165179			2.71208	0.010483			2.71145	0.00751764			2.70895	-0.00503659
2.71895	0.0140071			2.71395	0.0250489			2.71728	0.0155121			2.71895	0.0264347			2.71542	0.00821054			2.71895	0.0152811			2.71562	0.0125915			2.71728	0.0187904			2.71853	0.0160933			2.71875	0.00988692			2.71812	0.00696629			2.71562	-0.00502914
2.72562	0.0148937			2.72062	0.0247359			2.72395	0.0163689			2.72562	0.0262409			2.72208	0.00828505			2.72562	0.0150353			2.72228	0.0135303			2.72395	0.0198781			2.7252	0.0161305			2.72542	0.00946224			2.72478	0.00672042			2.72228	-0.00526011
2.73228	0.0160038			2.72728	0.024341			2.73062	0.0160113			2.73228	0.0256374			2.72875	0.00861287			2.73228	0.0148714			2.72895	0.0144616			2.73062	0.0209734			2.73187	0.0166819			2.73208	0.0089258			2.73145	0.00675023			2.72895	-0.00541657
2.73895	0.0168905			2.73395	0.0239089			2.73728	0.0150949			2.73895	0.024654			2.73542	0.00876188			2.73895	0.0152811			2.73562	0.0151619			2.73728	0.0216514			2.73853	0.0172779			2.73875	0.00850856			2.73812	0.0070855			2.73562	-0.0057891
2.74562	0.0174567			2.74062	0.0235364			2.74395	0.0147671			2.74562	0.0238568			2.74208	0.00856072			2.74562	0.0162721			2.74228	0.0153482			2.74395	0.0222102			2.7452	0.0177547			2.74542	0.00847876			2.74478	0.00796467			2.74228	-0.00645965
2.75228	0.018172			2.74728	0.0231639			2.75062	0.0151768			2.75228	0.0233203			2.74875	0.00865757			2.75228	0.0169203			2.74895	0.0145733			2.75062	0.0225455			2.75187	0.0182763			2.75208	0.00824034			2.75145	0.0089854			2.74895	-0.00697374
2.75895	0.0188351			2.75395	0.0230074			2.75728	0.0150949			2.75895	0.0228062			2.75542	0.00911951			2.75895	0.0169948			2.75562	0.0132397			2.75728	0.0223219			2.75853	0.01885			2.75875	0.00758469			2.75812	0.00969321			2.75562	-0.00694394
2.76562	0.0194982			2.76062	0.0229627			2.76395	0.0145584			2.76562	0.0224933			2.76208	0.00959635			2.76562	0.0161603			2.76228	0.0119954			2.76395	0.0215918			2.7652	0.0190139			2.76542	0.00652671			2.76478	0.0101104			2.76228	-0.0063628
2.77228	0.0202581			2.76728	0.0229031			2.77062	0.0143349			2.77228	0.0226125			2.76875	0.00979751			2.77228	0.0153482			2.76895	0.0110716			2.77062	0.0207275			2.77187	0.0186265			2.77208	0.00568479			2.77145	0.0103414			2.76895	-0.00594556
2.77895	0.0207648			2.77395	0.0227466			2.77728	0.0145957			2.77895	0.0232831			2.77542	0.0100508			2.77895	0.0147			2.77562	0.0104234			2.77728	0.0206307			2.77853	0.0182912			2.77875	0.00520051			2.77812	0.0105426			2.77562	-0.00578165
2.78562	0.0206679			2.78062	0.0225902			2.78395	0.0149161			2.78562	0.0240281			2.78208	0.0107214			2.78562	0.0143796			2.78228	0.0102147			2.78395	0.0211671			2.7852	0.0182763			2.78542	0.00458211			2.78478	0.0103042			2.78228	-0.00590086
2.79228	0.0196546			2.78728	0.0227168			2.79062	0.0149459			2.79228	0.0242889			2.78875	0.0111535			2.79228	0.0147223			2.78895	0.0104979			2.79062	0.0219122			2.79187	0.0188276			2.79208	0.00419468			2.79145	0.0100285			2.78895	-0.0064075
2.79895	0.0183731			2.79395	0.0230819			2.79728	0.0150651			2.79895	0.0243783			2.79542	0.0109896			2.79895	0.0157505			2.79562	0.0107288			2.79728	0.0228062			2.79853	0.0195354			2.79875	0.00430644			2.79812	0.00992417			2.79562	-0.00728667
2.80562	0.0171065			2.80062	0.0236183			2.80395	0.015378			2.80562	0.0247806			2.80208	0.0105649			2.80562	0.0174046			2.80228	0.0106171			2.80395	0.0239238			2.8052	0.0204071			2.80542	0.00501424			2.80478	0.0100955			2.80228	-0.00802428
2.81228	0.0162795			2.80728	0.0240654			2.81062	0.0157058			2.81228	0.0252202			2.80875	0.0103265			2.81228	0.0189468			2.80895	0.0106394			2.81062	0.024803			2.81187	0.0208914			2.81208	0.00584871			2.81145	0.0105351			2.80895	-0.00815839
2.81895	0.016138			2.81395	0.0245199			2.81728	0.0159964			2.81895	0.0254065			2.81542	0.0104979			2.81895	0.0197962			2.81562	0.0111461			2.81728	0.0246614			2.81853	0.0208914			2.81875	0.00683218			2.81812	0.0112951			2.81562	-0.00803918
2.82562	0.0165775			2.82062	0.0248551			2.82395	0.0162199			2.82562	0.0252649			2.82208	0.010781			2.82562	0.0196323			2.82228	0.0119135			2.82395	0.0239015			2.8252	0.0206605			2.82542	0.00794232			2.82478	0.0124946			2.82228	-0.00806153
2.83228	0.0173524			2.82728	0.0248253			2.83062	0.0163838			2.83228	0.0257865			2.82875	0.0111088			2.83228	0.0192225			2.82895	0.0124946			2.83062	0.0231713			2.83187	0.0202507			2.83208	0.0089258			2.83145	0.0135079			2.82895	-0.00790507
2.83895	0.0181571			2.83395	0.024803			2.83728	0.0163838			2.83895	0.0269413			2.83542	0.0112727			2.83895	0.0186116			2.83562	0.0127628			2.83728	0.0227019			2.83853	0.0197589			2.83875	0.009574			2.83812	0.0140443			2.83562	-0.00731647
2.84562	0.018917			2.84062	0.02487			2.84395	0.0159666			2.84562	0.0281036			2.84208	0.0110343			2.84562	0.0180602			2.84228	0.0128523			2.84395	0.0222027			2.8452	0.0191033			2.84542	0.00976771			2.84478	0.0137314			2.84228	-0.00656396
2.85228	0.0194758			2.84728	0.0248551			2.85062	0.0155196			2.85228	0.028871			2.84875	0.01055			2.85228	0.0173524			2.84895	0.0124127			2.85062	0.0218078			2.85187	0.0188053			2.85208	0.00932813			2.85145	0.0127256			2.84895	-0.00613183
2.85895	0.0197962			2.85395	0.0246018			2.85728	0.0151619			2.85895	0.0290647			2.85542	0.00994653			2.85895	0.016816			2.85562	0.0115633			2.85728	0.0216439			2.85853	0.0190288			2.85875	0.00843406			2.85812	0.0109002			2.85562	-0.00616908
2.86562	0.0202209			2.86062	0.0243112			2.86395	0.0153854			2.86562	0.0289679			2.86208	0.00921637			2.86562	0.0167191			2.86228	0.0106916			2.86395	0.0210851			2.8652	0.0191182			2.86542	0.00759214			2.86478	0.00914931			2.86228	-0.00641495
2.87228	0.0207797			2.86728	0.0246838			2.87062	0.0156909			2.87228	0.0281632			2.86875	0.00827014			2.87228	0.0167117			2.86895	0.0101998			2.87062	0.0201166			2.87187	0.0189245			2.87208	0.00696629			2.87145	0.00827014			2.86895	-0.00689179
2.87895	0.0211224			2.87395	0.0252798			2.87728	0.0158697			2.87895	0.0268221			2.87542	0.00751019			2.87895	0.0167862			2.87562	0.0104755			2.87728	0.0190064			2.87853	0.0184253			2.87875	0.00617653			2.87812	0.00831485			2.87562	-0.00756979
2.88562	0.020802			2.88062	0.0257567			2.88395	0.0160038			2.88562	0.0257343			2.88208	0.00745803			2.88562	0.016883			2.88228	0.0113249			2.88395	0.0180975			2.8852	0.0179708			2.88542	0.00520796			2.88478	0.00915676			2.88228	-0.00856817
2.89228	0.0202358			2.88728	0.0263453			2.89062	0.0158027			2.89228	0.0253618			2.88875	0.00808388			2.89228	0.0171885			2.88895	0.0124723			2.89062	0.0175461			2.89187	0.0172257			2.89208	0.00479817			2.89145	0.0103638			2.88895	-0.00962615
2.89895	0.0198409			2.89395	0.0269488			2.89728	0.0152066			2.89895	0.0256002			2.89542	0.00894815			2.89895	0.0175387			2.89562	0.0131428			2.89728	0.0176951			2.89853	0.0162795			2.89875	0.00484288			2.89812	0.0122562			2.89562	-0.0103936
2.90562	0.0197589			2.90062	0.0277236			2.90395	0.0141636			2.90562	0.0259429			2.90208	0.00947714			2.90562	0.0178143			2.90228	0.0132844			2.90395	0.0185668			2.9052	0.0157654			2.90542	0.0050962			2.90478	0.0139773			2.90228	-0.0103712
2.91228	0.0198334			2.90728	0.0283048			2.91062	0.0133365			2.91228	0.0265837			2.90875	0.0096783			2.91228	0.0178888			2.90895	0.0130087			2.91062	0.0195205			2.91187	0.0159815			2.91208	0.00503659			2.91145	0.0149533			2.90895	-0.00968575
2.91895	0.0196248			2.91395	0.0284389			2.91728	0.0132695			2.91895	0.0273883			2.91542	0.00970811			2.91895	0.0179783			2.91562	0.0124127			2.91728	0.0200421			2.91853	0.0167042			2.91875	0.0050813			2.91812	0.0151992			2.91562	-0.0089258
2.92562	0.0195056			2.92062	0.0282601			2.92395	0.0138357			2.92562	0.0279099			2.92208	0.00979751			2.92562	0.0179112			2.92228	0.0114143			2.92395	0.0203699			2.9252	0.0174791			2.92542	0.00544637			2.92478	0.0147596			2.92228	-0.00848621
2.93228	0.0194833			2.92728	0.0277981			2.93062	0.0150055			2.93228	0.0278279			2.92875	0.0096187			2.93228	0.0177026			2.92895	0.010699			2.93062	0.0206381			2.93187	0.0182837			2.93208	0.00590831			2.93145	0.0139028			2.92895	-0.00811368
2.93895	0.0197142			2.93395	0.027515			2.93728	0.0162572			2.93895	0.0273585			2.93542	0.00924617			2.93895	0.0172332			2.93562	0.0107363			2.93728	0.0206307			2.93853	0.0186935			2.93875	0.00628829			2.93812	0.0126138			2.93562	-0.00755489
2.94562	0.0200197			2.94062	0.0270978			2.94395	0.0174269			2.94562	0.0268295			2.94208	0.00887364			2.94562	0.0166669			2.94228	0.0113472			2.94395	0.0202879			2.9452	0.0186265			2.94542	0.00624359			2.94478	0.0114143			2.94228	-0.00739098
2.95228	0.0202209			2.94728	0.0265241			2.95062	0.0183806			2.95228	0.0261962			2.94875	0.00885874			2.95228	0.0163168			2.94895	0.0120103			2.95062	0.0197887			2.95187	0.0178814			2.95208	0.00606477			2.95145	0.0105575			2.94895	-0.0077635
2.95895	0.0207946			2.95395	0.0263229			2.95728	0.0189692			2.95895	0.0258908			2.95542	0.00929832			2.95895	0.0159889			2.95562	0.0125393			2.95728	0.0193566			2.95853	0.0171065			2.95875	0.00591576			2.95812	0.00990927			2.95562	-0.00813603
2.96562	0.0215024			2.96062	0.0266209			2.96395	0.0193715			2.96562	0.0259951			2.96208	0.00999868			2.96562	0.0156537			2.96228	0.0132099			2.96395	0.0189543			2.9652	0.0164732			2.96542	0.00630319			2.96478	0.0096187			2.96228	-0.00824779
2.97228	0.0221431			2.96728	0.0272021			2.97062	0.0195131			2.97228	0.026457			2.96875	0.0106245			2.97228	0.0152662			2.96895	0.0136271			2.97062	0.0186414			2.97187	0.016205			2.97208	0.0070706			2.97145	0.00972301			2.96895	-0.00815839
2.97895	0.0225008			2.97395	0.0273958			2.97728	0.0195503			2.97895	0.027068			2.97542	0.0105575			2.97895	0.0154376			2.97562	0.0136346			2.97728	0.0185296			2.97853	0.0165254			2.97875	0.00768155			2.97812	0.010252			2.97562	-0.00841916
2.98562	0.0225529			2.98062	0.0273734			2.98395	0.0190735			2.98562	0.0276193			2.98208	0.0102296			2.98562	0.0158772			2.98228	0.0133738			2.98395	0.0188723			2.9852	0.0171959			2.98542	0.00823289			2.98478	0.0107586			2.98228	-0.00880659
2.99228	0.0222623			2.98728	0.027433			2.99062	0.0183582			2.99228	0.0277907			2.98875	0.00996888			2.99228	0.0160336			2.98895	0.0131652			2.99062	0.0193194			2.99187	0.0179037			2.99208	0.00914931			2.99145	0.0108182			2.98895	-0.00910461
2.99895	0.021562			2.99395	0.0276789			2.99728	0.0175908			2.99895	0.0274256			2.99542	0.00996888			2.99895	0.0160486			2.99562	0.0130609			2.99728	0.0192225			2.99853	0.0181124			2.99875	0.010401			2.99812	0.0104234			2.99562	-0.00941008
3.00562	0.0210479			3.00062	0.0278801			3.00395	0.0171959			3.00562	0.0266284			3.00208	0.0096783			3.00562	0.0161156			3.00228	0.0127032			3.00395	0.0184551			3.0052	0.0183135			3.00542	0.0109896			3.00478	0.0101551			3.00228	-0.00941753
3.01228	0.0208095			3.00728	0.0277832			3.01062	0.017032			3.01228	0.0261441			3.00875	0.00935048			3.01228	0.0162646			3.00895	0.0121742			3.01062	0.0175014			3.01187	0.0187829			3.01208	0.010848			3.01145	0.0102222			3.00895	-0.00936538
3.01895	0.0205711			3.01395	0.0277832			3.01728	0.0171959			3.01895	0.0263527			3.01542	0.00952184			3.01895	0.0159666			3.01562	0.0120401			3.01728	0.0165328			3.01853	0.0194684			3.01875	0.0105649			3.01812	0.0104457			3.01562	-0.00900775
3.02562	0.0200048			3.02062	0.0280812			3.02395	0.0176281			3.02562	0.0270307			3.02208	0.00995398			3.02562	0.0155866			3.02228	0.0124276			3.02395	0.0153854			3.0252	0.0202134			3.02542	0.0100732			3.02478	0.0105351			3.02228	-0.0083968
3.03228	0.0197142			3.02728	0.028275			3.03062	0.0177249			3.03228	0.0279099			3.02875	0.0101924			3.03228	0.0156686			3.02895	0.0130311			3.03062	0.0144169			3.03187	0.0209734			3.03208	0.00894815			3.03145	0.0106618			3.02895	-0.00781566
3.03895	0.0198632			3.03395	0.0276938			3.03728	0.0175461			3.03895	0.0287741			3.03542	0.0102222			3.03895	0.0157654			3.03562	0.0134259			3.03728	0.0143945			3.03853	0.0216141			3.03875	0.00730902			3.03812	0.0111163			3.03562	-0.00739098
3.04562	0.0200495			3.04062	0.0265688			3.04395	0.0170022			3.04562	0.0297874			3.04208	0.0105724			3.04562	0.0156686			3.04228	0.0137389			3.04395	0.0153184			3.0452	0.021562			3.04542	0.00599027			3.04478	0.0113919			3.04228	-0.00714511
3.05228	0.019908			3.04728	0.0254959			3.05062	0.0164583			3.05228	0.0304729			3.04875	0.0109524			3.05228	0.0156164			3.04895	0.014022			3.05062	0.0162646			3.05187	0.0210479			3.05208	0.00514835			3.05145	0.0115037			3.04895	-0.00690669
3.05895	0.0194088			3.05395	0.0249892			3.05728	0.0157952			3.05895	0.0303611			3.05542	0.0109151			3.05895	0.015907			3.05562	0.0137314			3.05728	0.0166446			3.05853	0.0203922			3.05875	0.0044629			3.05812	0.0113547			3.05562	-0.0064224
3.06562	0.0193641			3.06062	0.0248775			3.06395	0.0152513			3.06562	0.0296235			3.06208	0.010632			3.06562	0.0163615			3.06228	0.0130162			3.06395	0.0168607			3.0652	0.0195354			3.06542	0.00408292			3.06478	0.0113174			3.06228	-0.00584126
3.07228	0.0197664			3.06728	0.0249743			3.07062	0.0155717			3.07228	0.028573			3.06875	0.0106841			3.07228	0.0167117			3.06895	0.0123903			3.07062	0.0171587			3.07187	0.0186488			3.07208	0.00423938			3.07145	0.0113919			3.06895	-0.00523031
3.07895	0.0204295			3.07395	0.0252575			3.07728	0.0165701			3.07895	0.0276193			3.07542	0.0106618			3.07895	0.0172406			3.07562	0.0119954			3.07728	0.0174418			3.07853	0.0181943			3.07875	0.00475347			3.07812	0.0116676			3.07562	-0.00474602
3.08562	0.020802			3.08062	0.0258759			3.08395	0.0177622			3.08562	0.0268444			3.08208	0.0102073			3.08562	0.0179037			3.08228	0.0118762			3.08395	0.017494			3.0852	0.018537			3.08542	0.00530481			3.08478	0.0122041			3.08228	-0.004448
3.09228	0.0207648			3.08728	0.0269711			3.09062	0.0186488			3.09228	0.0263751			3.08875	0.00955909			3.09228	0.0181496			3.08895	0.0116974			3.09062	0.0175089			3.09187	0.019148			3.09208	0.00573695			3.09145	0.0124946			3.08895	-0.00420958
3.09895	0.0206083			3.09395	0.0282452			3.09728	0.0194013			3.09895	0.0261515			3.09542	0.00953674			3.09895	0.0181273			3.09562	0.0118315			3.09728	0.0176132			3.09853	0.0196248			3.09875	0.00628829			3.09812	0.0123158			3.09562	-0.00423193
3.10562	0.0203475			3.10062	0.0291541			3.10395	0.0199452			3.10562	0.0260547			3.10208	0.0102594			3.10562	0.0182241			3.10228	0.0118688			3.10395	0.0176057			3.1052	0.0203624			3.10542	0.00695139			3.10478	0.0121593			3.10228	-0.00448525
3.11228	0.0198558			3.10728	0.0296533			3.11062	0.0197515			3.11228	0.026606			3.10875	0.0110045			3.11228	0.0184029			3.10895	0.0117421			3.11062	0.0175685			3.11187	0.0213534			3.11208	0.00755489			3.11145	0.0125617			3.10895	-0.00496209
3.11895	0.0193417			3.11395	0.0301823			3.11728	0.0189766			3.11895	0.027433			3.11542	0.0115708			3.11895	0.0183955			3.11562	0.0117645			3.11728	0.0173971			3.11853	0.0220686			3.11875	0.00794232			3.11812	0.0131577			3.11562	-0.00563264
3.12562	0.0188947			3.12062	0.0306517			3.12395	0.0181571			3.12562	0.0279993			3.12208	0.0118092			3.12562	0.0179261			3.12228	0.0119358			3.12395	0.017181			3.1252	0.0225678			3.12542	0.00798702			3.12478	0.0132918			3.12228	-0.00627339
3.13228	0.0189692			3.12728	0.0308454			3.13062	0.0174642			3.13228	0.0279844			3.12875	0.0118166			3.13228	0.0173897			3.12895	0.0125244			3.13062	0.0169426			3.13187	0.0227243			3.13208	0.0077486			3.13145	0.0132844			3.12895	-0.00675768
3.13895	0.0193194			3.13395	0.0305548			3.13728	0.0165477			3.13895	0.0280589			3.13542	0.0113621			3.13895	0.0168085			3.13562	0.0133589			3.13728	0.0172853			3.13853	0.0227392			3.13875	0.00731647			3.13812	0.0137091			3.13562	-0.00720471
3.14562	0.0196025			3.14062	0.0303239			3.14395	0.0154898			3.14562	0.0287443			3.14208	0.010483			3.14562	0.0159219			3.14228	0.0146106			3.14395	0.0181794			3.1452	0.0221506			3.14542	0.00673532			3.14478	0.0145361			3.14228	-0.00755489
3.15228	0.0195727			3.14728	0.0299439			3.15062	0.0147745			3.15228	0.0290871			3.14875	0.00955909			3.15228	0.0146553			3.14895	0.015609			3.15062	0.0194311			3.15187	0.0213236			3.15208	0.0063926			3.15145	0.0152066			3.14895	-0.0076741
3.15895	0.0190213			3.15395	0.0292212			3.15728	0.0145286			3.15895	0.0289008			3.15542	0.00863522			3.15895	0.0131652			3.15562	0.0161752			3.15728	0.0205338			3.15853	0.0207275			3.15875	0.00607222			3.15812	0.0153929			3.15562	-0.00752509
3.16562	0.0184998			3.16062	0.0284016			3.16395	0.0144392			3.16562	0.0284687			3.16208	0.00793487			3.16562	0.0118464			3.16228	0.0164136			3.16395	0.021264			3.1652	0.0201538			3.16542	0.0057295			3.16478	0.0151321			3.16228	-0.00742823
3.17228	0.0180006			3.16728	0.0278875			3.17062	0.0145733			3.17228	0.0284314			3.16875	0.0076443			3.17228	0.0111386			3.16895	0.0165701			3.17062	0.0214204			3.17187	0.019744			3.17208	0.00540912			3.17145	0.0145286			3.16895	-0.00738353
3.17895	0.0176728			3.17395	0.0273809			3.17728	0.0150129			3.17895	0.0286698			3.17542	0.00789016			3.17895	0.0111312			3.17562	0.0163242			3.17728	0.0210777			3.17853	0.019528			3.17875	0.00542402			3.17812	0.0139326			3.17562	-0.00706315
3.18562	0.017345			3.18062	0.0265688			3.18395	0.0156686			3.18562	0.0285432			3.18208	0.0083223			3.18562	0.0116527			3.18228	0.0153482			3.18395	0.0206754			3.1852	0.0197664			3.18542	0.00600517			3.18478	0.0133961			3.18228	-0.00671297
3.19228	0.0171438			3.18728	0.0262335			3.19062	0.0160187			3.19228	0.0286549			3.18875	0.00882894			3.19228	0.0126362			3.18895	0.0143051			3.19062	0.0201836			3.19187	0.0201464			3.19208	0.00649691			3.19145	0.0130683			3.18895	-0.00656396
3.19895	0.0172257			3.19395	0.0269264			3.19728	0.0160187			3.19895	0.0292361			3.19542	0.00956655			3.19895	0.0138581			3.19562	0.0134334			3.19728	0.0198856			3.19853	0.0204742			3.19875	0.0070706			3.19812	0.013262			3.19562	-0.00670552
3.20562	0.0173375			3.20062	0.0281855			3.20395	0.0158399			3.20562	0.0304058			3.20208	0.0102669			3.20562	0.0149682			3.20228	0.0127107			3.20395	0.0195503			3.2052	0.0205263			3.20542	0.00780076			3.20478	0.0143424			3.20228	-0.00684708
3.21228	0.0176206			3.20728	0.029102			3.21062	0.0158623			3.21228	0.0312924			3.20875	0.01093			3.21228	0.0155345			3.20895	0.0116453			3.21062	0.0191778			3.21187	0.0203252			3.21208	0.00894815			3.21145	0.0156984			3.20895	-0.00695884
3.21895	0.0182763			3.21395	0.0298694			3.21728	0.016138			3.21895	0.0312179			3.21542	0.0111237			3.21895	0.0152737			3.21562	0.0109151			3.21728	0.0184104			3.21853	0.0199229			3.21875	0.00996888			3.21812	0.0165105			3.21562	-0.00717491
3.22562	0.0190139			3.22062	0.0308603			3.22395	0.0167489			3.22562	0.0306144			3.22208	0.011377			3.22562	0.0146925			3.22228	0.0112131			3.22395	0.0171289			3.2252	0.0194609			3.22542	0.0106469			3.22478	0.016205			3.22228	-0.00757724
3.23228	0.0194833			3.22728	0.0317022			3.23062	0.0175089			3.23228	0.0298172			3.22875	0.0115335			3.23228	0.0140145			3.22895	0.0125244			3.23062	0.0158399			3.23187	0.0191182			3.23208	0.0111684			3.23145	0.015609			3.22895	-0.00800192
3.23895	0.0191778			3.23395	0.0317544			3.23728	0.0179037			3.23895	0.0286847			3.23542	0.0119209			3.23895	0.0134259			3.23562	0.0142604			3.23728	0.0147745			3.23853	0.0187531			3.23875	0.0114515			3.23812	0.0148341			3.23562	-0.00801682
3.24562	0.0185966			3.24062	0.0310689			3.24395	0.0177398			3.24562	0.0270233			3.24208	0.0125542			3.24562	0.0134185			3.24228	0.0157207			3.24395	0.0145584			3.2452	0.0185668			3.24542	0.0113696			3.24478	0.0140816			3.24228	-0.0077486
3.25228	0.0182092			3.24728	0.0302196			3.25062	0.0171289			3.25228	0.0255853			3.24875	0.0129342			3.25228	0.0139475			3.24895	0.0168234			3.25062	0.0155047			3.25187	0.0186116			3.25208	0.0109226			3.25145	0.0133663			3.24895	-0.00737607
3.25895	0.0179186			3.25395	0.0294298			3.25728	0.0163466			3.25895	0.0251755			3.25542	0.0131056			3.25895	0.0148714			3.25562	0.017412			3.25728	0.0174269			3.25853	0.0188798			3.25875	0.0104606			3.25812	0.0131279			3.25562	-0.00707805
3.26562	0.0178218			3.26062	0.0287667			3.26395	0.0157654			3.26562	0.0258163			3.26208	0.0127628			3.26562	0.0154376			3.26228	0.0175908			3.26395	0.0191107			3.2652	0.0192299			3.26542	0.0101849			3.26478	0.0135079			3.26228	-0.00656396
3.27228	0.0178069			3.26728	0.0283793			3.27062	0.0158995			3.27228	0.0267327			3.26875	0.0121817			3.27228	0.0157207			3.26895	0.0176877			3.27062	0.019975			3.27187	0.0193641			3.27208	0.00990927			3.27145	0.0139028			3.26895	-0.00619143
3.27895	0.0184551			3.27395	0.0286922			3.27728	0.0170469			3.27895	0.028193			3.27542	0.0113025			3.27895	0.0160336			3.27562	0.0180081			3.27728	0.0203699			3.27853	0.0191554			3.27875	0.00951439			3.27812	0.0139475			3.27562	-0.00614673
3.28562	0.0196993			3.28062	0.0295341			3.28395	0.0187233			3.28562	0.0298843			3.28208	0.0103787			3.28562	0.016138			3.28228	0.0185743			3.28395	0.0205636			3.2852	0.018917			3.28542	0.00900775			3.28478	0.0135154			3.28228	-0.00629574
3.29228	0.0210106			3.28728	0.0304133			3.29062	0.0202358			3.29228	0.0312105			3.28875	0.00958145			3.29228	0.0158995			3.28895	0.0191554			3.29062	0.0202954			3.29187	0.0188425			3.29208	0.00841171			3.29145	0.0129715			3.28895	-0.00623614
3.29895	0.0218078			3.29395	0.0308603			3.29728	0.0213534			3.29895	0.0316501			3.29542	0.00911951			3.29895	0.0153556			3.29562	0.0196099			3.29728	0.0193939			3.29853	0.0188872			3.29875	0.00794232			3.29812	0.0123456			3.29562	-0.00619143
3.30562	0.0215992			3.30062	0.0308976			3.30395	0.0218078			3.30562	0.0314787			3.30208	0.00897795			3.30562	0.0151098			3.30228	0.0197664			3.30395	0.0185519			3.3052	0.0190362			3.30542	0.00715256			3.30478	0.0118017			3.30228	-0.00654906
3.31228	0.0209808			3.30728	0.0308007			3.31062	0.0214353			3.31228	0.0313371			3.30875	0.00925362			3.31228	0.0149682			3.30895	0.0193417			3.31062	0.0182092			3.31187	0.0190064			3.31208	0.00630319			3.31145	0.0111312			3.30895	-0.00682473
3.31895	0.0205263			3.31395	0.0304207			3.31728	0.0205636			3.31895	0.0309944			3.31542	0.00979006			3.31895	0.0147521			3.31562	0.018239			3.31728	0.0184327			3.31853	0.0191182			3.31875	0.00562519			3.31812	0.0107139			3.31562	-0.00692159
3.32562	0.0203699			3.32062	0.0298992			3.32395	0.019744			3.32562	0.0305325			3.32208	0.0101924			3.32562	0.0145882			3.32228	0.0172555			3.32395	0.0186712			3.3252	0.0191331			3.32542	0.00534207			3.32478	0.0107288			3.32228	-0.00697374
3.33228	0.0200421			3.32728	0.0295117			3.33062	0.0193715			3.33228	0.0302196			3.32875	0.0102073			3.33228	0.0148267			3.32895	0.0171214			3.33062	0.0189021			3.33187	0.0192299			3.33208	0.0050962			3.33145	0.0113621			3.32895	-0.00749528
3.33895	0.019595			3.33395	0.0294			3.33728	0.0192076			3.33895	0.0304654			3.33542	0.0100359			3.33895	0.0155047			3.33562	0.0176057			3.33728	0.0192299			3.33853	0.0196844			3.33875	0.0044778			3.33812	0.0123084			3.33562	-0.00812113
3.34562	0.0197217			3.34062	0.029549			3.34395	0.0190586			3.34562	0.0309572			3.34208	0.0101477			3.34562	0.015974			3.34228	0.0179559			3.34395	0.0199825			3.3452	0.0202507			3.34542	0.00413507			3.34478	0.0132024			3.34228	-0.00838935
3.35228	0.0205263			3.34728	0.0299811			3.35062	0.019066			3.35228	0.0311807			3.34875	0.010334			3.35228	0.016287			3.34895	0.017643			3.35062	0.0210032			3.35187	0.0210032			3.35208	0.00440329			3.35145	0.0138283			3.34895	-0.00869483
3.35895	0.0211			3.35395	0.0308678			3.35728	0.0192449			3.35895	0.0311285			3.35542	0.00983477			3.35895	0.0163168			3.35562	0.0172257			3.35728	0.0217482			3.35853	0.0213683			3.35875	0.00549853			3.35812	0.0140518			3.35562	-0.00916421
3.36562	0.0209585			3.36062	0.0318661			3.36395	0.0195354			3.36562	0.0310838			3.36208	0.00931323			3.36562	0.0163391			3.36228	0.0167787			3.36395	0.0222623			3.3652	0.0215247			3.36542	0.00682473			3.36478	0.0139549			3.36228	-0.00939518
3.37228	0.0203624			3.36728	0.0324175			3.37062	0.0195131			3.37228	0.0311583			3.36875	0.00943244			3.37228	0.0161603			3.36895	0.0164732			3.37062	0.0221953			3.37187	0.0211373			3.37208	0.00812858			3.37145	0.0137761			3.36895	-0.00912696
3.37895	0.0199378			3.37395	0.0329018			3.37728	0.0194088			3.37895	0.0313222			3.37542	0.0101775			3.37895	0.0158101			3.37562	0.0161752			3.37728	0.0220016			3.37853	0.0201166			3.37875	0.00922382			3.37812	0.0134781			3.37562	-0.00870228
3.38562	0.019744			3.38062	0.0335723			3.38395	0.0194907			3.38562	0.0313893			3.38208	0.0105724			3.38562	0.0153854			3.38228	0.0159442			3.38395	0.0213981			3.3852	0.0188798			3.38542	0.00989437			3.38478	0.0128299			3.38228	-0.00871718
3.39228	0.0192598			3.38728	0.0338331			3.39062	0.0198409			3.39228	0.0313967			3.38875	0.010401			3.39228	0.0150874			3.38895	0.0163093			3.39062	0.0204816			3.39187	0.0178739			3.39208	0.00999868			3.39145	0.0121668			3.38895	-0.00878423
3.39895	0.0187755			3.39395	0.0331104			3.39728	0.0199229			3.39895	0.0311509			3.39542	0.0105798			3.39895	0.0153482			3.39562	0.0169501			3.39728	0.0193194			3.39853	0.0176206			3.39875	0.00945479			3.39812	0.0120848			3.39562	-0.00880659
3.40562	0.0184178			3.40062	0.0316054			3.40395	0.0194013			3.40562	0.0310242			3.40208	0.0106767			3.40562	0.0157505			3.40228	0.0176653			3.40395	0.0185296			3.4052	0.0173375			3.40542	0.00861287			3.40478	0.0127703			3.40228	-0.00920892
3.41228	0.0184923			3.40728	0.030227			3.41062	0.0189841			3.41228	0.0312999			3.40875	0.0102893			3.41228	0.0162274			3.40895	0.0179484			3.41062	0.018768			3.41187	0.0169501			3.41208	0.00760704			3.41145	0.0131726			3.40895	-0.00997633
3.41895	0.0186488			3.41395	0.028953			3.41728	0.0189096			3.41895	0.0318289			3.41542	0.00923127			3.41895	0.0167638			3.41562	0.0180155			3.41728	0.0194088			3.41853	0.0167713			3.41875	0.00672787			3.41812	0.0131801			3.41562	-0.0109002
3.42562	0.0185743			3.42062	0.0276119			3.42395	0.0189766			3.42562	0.0323504			3.42208	0.008367			3.42562	0.0174493			3.42228	0.0181347			3.42395	0.0199452			3.4252	0.0170097			3.42542	0.00624359			3.42478	0.0133365			3.42228	-0.011608
3.43228	0.0184327			3.42728	0.0267625			3.43062	0.0187829			3.43228	0.0326931			3.42875	0.00810623			3.43228	0.0179186			3.42895	0.0180826			3.43062	0.0201687			3.43187	0.0174418			3.43208	0.00628084			3.43145	0.0139549			3.42895	-0.0120029
3.43895	0.0183284			3.43395	0.0267774			3.43728	0.0186786			3.43895	0.0330359			3.43542	0.00814348			3.43895	0.0178069			3.43562	0.0179559			3.43728	0.0205711			3.43853	0.0179857			3.43875	0.00630319			3.43812	0.0147894			3.43562	-0.0121444
3.44562	0.0185072			3.44062	0.0276491			3.44395	0.0192299			3.44562	0.0333115			3.44208	0.00844896			3.44562	0.0174716			3.44228	0.0176951			3.44395	0.0208467			3.4452	0.0191778			3.44542	0.00613183			3.44478	0.0150427			3.44228	-0.0120103
3.45228	0.0187755			3.44728	0.0286996			3.45062	0.0197664			3.45228	0.0332668			3.44875	0.00882149			3.45228	0.0168309			3.44895	0.0172704			3.45062	0.0208914			3.45187	0.0210479			3.45208	0.00627339			3.45145	0.0150874			3.44895	-0.0117943
3.45895	0.0190511			3.45395	0.0296757			3.45728	0.0199005			3.45895	0.0325367			3.45542	0.00941008			3.45895	0.0157058			3.45562	0.0168085			3.45728	0.0208914			3.45853	0.0227764			3.45875	0.00689179			3.45812	0.0150353			3.45562	-0.0115037
3.46562	0.0194758			3.46062	0.0304654			3.46395	0.019379			3.46562	0.031583			3.46208	0.00988692			3.46562	0.0142306			3.46228	0.0165477			3.46395	0.0213236			3.4652	0.0236183			3.46542	0.00726432			3.46478	0.0149012			3.46228	-0.0105426
3.47228	0.0201762			3.46728	0.0310019			3.47062	0.019066			3.47228	0.0310987			3.46875	0.00988692			3.47228	0.0131503			3.46895	0.0167638			3.47062	0.0222847			3.47187	0.0238866			3.47208	0.00691414			3.47145	0.0146627			3.46895	-0.00943989
3.47895	0.0210851			3.47395	0.0310987			3.47728	0.0188798			3.47895	0.0314936			3.47542	0.009574			3.47895	0.0127479			3.47562	0.0171289			3.47728	0.0233129			3.47853	0.0234768			3.47875	0.00662357			3.47812	0.014089			3.47562	-0.00870973
3.48562	0.0215843			3.48062	0.0307336			3.48395	0.018321			3.48562	0.0318736			3.48208	0.00924617			3.48562	0.0123754			3.48228	0.0174195			3.48395	0.0239462			3.4852	0.0224262			3.48542	0.00689924			3.48478	0.013724			3.48228	-0.00862777
3.49228	0.0219047			3.48728	0.0303313			3.49062	0.0174642			3.49228	0.031881			3.48875	0.00924617			3.49228	0.0119805			3.48895	0.0174567			3.49062	0.0238121			3.49187	0.0210032			3.49208	0.0071153			3.49145	0.0136793			3.48895	-0.00847876
3.49895	0.0222176			3.49395	0.0304133			3.49728	0.0169501			3.49895	0.0319108			3.49542	0.00922382			3.49895	0.0120699			3.49562	0.0173301			3.49728	0.0233799			3.49853	0.019975			3.49875	0.00683218			3.49812	0.0136867			3.49562	-0.00797212
3.50562	0.0225008			3.50062	0.0312105			3.50395	0.0175461			3.50562	0.0322163			3.50208	0.00921637			3.50562	0.0130087			3.50228	0.0170097			3.50395	0.0230372			3.5052	0.0195429			3.50542	0.00664592			3.50478	0.0136569			3.50228	-0.00784546
3.51228	0.0220239			3.50728	0.0322908			3.51062	0.0183508			3.51228	0.0324398			3.50875	0.00937283			3.51228	0.0139251			3.50895	0.0165105			3.51062	0.0228509			3.51187	0.0191405			3.51208	0.00677258			3.51145	0.0135899			3.50895	-0.00799447
3.51895	0.020504			3.51395	0.0333339			3.51728	0.0187978			3.51895	0.0323728			3.51542	0.00981241			3.51895	0.0143349			3.51562	0.0161231			3.51728	0.0223741			3.51853	0.019148			3.51875	0.0063926			3.51812	0.0136122			3.51562	-0.00765175
3.52562	0.0188872			3.52062	0.034079			3.52395	0.0190735			3.52562	0.0326633			3.52208	0.010252			3.52562	0.0148341			3.52228	0.0162125			3.52395	0.021629			3.5252	0.0197291			3.52542	0.00550598			3.52478	0.0136644			3.52228	-0.00669062
3.53228	0.0175014			3.52728	0.0343695			3.53062	0.019677			3.53228	0.0333115			3.52875	0.0105649			3.53228	0.0156835			3.52895	0.0169277			3.53062	0.0210851			3.53187	0.0208765			3.53208	0.00498444			3.53145	0.0136867			3.52895	-0.00594556
3.53895	0.0167117			3.53395	0.0341535			3.53728	0.0204071			3.53895	0.0338256			3.53542	0.0107959			3.53895	0.0164062			3.53562	0.0176281			3.53728	0.0208467			3.53853	0.0219494			3.53875	0.00522286			3.53812	0.0142157			3.53562	-0.00602007
3.54562	0.0163019			3.54062	0.0336245			3.54395	0.0205711			3.54562	0.0335872			3.54208	0.01093			3.54562	0.0166148			3.54228	0.017859			3.54395	0.020802			3.5452	0.023067			3.54542	0.00579655			3.54478	0.0149161			3.54228	-0.00674278
3.55228	0.0165328			3.54728	0.0331849			3.55062	0.0203028			3.55228	0.0329763			3.54875	0.0108704			3.55228	0.0167042			3.54895	0.0175014			3.55062	0.0210106			3.55187	0.023894			3.55208	0.00645965			3.55145	0.0153333			3.54895	-0.00748783
3.55895	0.0174791			3.55395	0.0328198			3.55728	0.0201985			3.55895	0.0324845			3.55542	0.0101775			3.55895	0.0171587			3.55562	0.016652			3.55728	0.0213161			3.55853	0.0239536			3.55875	0.00752509			3.55812	0.0152141			3.55562	-0.00826269
3.56562	0.0184178			3.56062	0.0327826			3.56395	0.0203773			3.56562	0.0320077			3.56208	0.00905991			3.56562	0.0175461			3.56228	0.0155717			3.56395	0.0213981			3.5652	0.0236407			3.56542	0.00851601			3.56478	0.0148341			3.56228	-0.00888854
3.57228	0.0187829			3.56728	0.0328496			3.57062	0.0206754			3.57228	0.0313595			3.56875	0.00801682			3.57228	0.0175536			3.56895	0.0146925			3.57062	0.020884			3.57187	0.0233054			3.57208	0.00882894			3.57145	0.0147074			3.56895	-0.00926107
3.57895	0.0185221			3.57395	0.0329539			3.57728	0.020884			3.57895	0.0309572			3.57542	0.00771135			3.57895	0.0171512			3.57562	0.0143573			3.57728	0.020273			3.57853	0.0230968			3.57875	0.0083372			3.57812	0.0145435			3.57562	-0.0090152
3.58562	0.0183657			3.58062	0.0327975			3.58395	0.0210702			3.58562	0.031054			3.58208	0.00811368			3.58562	0.0163913			3.58228	0.0142679			3.58395	0.0197142			3.5852	0.0226274			3.58542	0.00742823			3.58478	0.0141263			3.58228	-0.00854582
3.59228	0.0187084			3.58728	0.0323653			3.59062	0.0213087			3.59228	0.0313446			3.58875	0.00866503			3.59228	0.0156239			3.58895	0.0142902			3.59062	0.0190213			3.59187	0.0224411			3.59208	0.00661612			3.59145	0.0138655			3.58895	-0.00870228
3.59895	0.019297			3.59395	0.0322312			3.59728	0.0216812			3.59895	0.0312328			3.59542	0.00890344			3.59895	0.0150576			3.59562	0.0144392			3.59728	0.0185817			3.59853	0.0229627			3.59875	0.00623614			3.59812	0.0139624			3.59562	-0.0096783
3.60562	0.0202581			3.60062	0.032343			3.60395	0.0222772			3.60562	0.0308901			3.60208	0.00923872			3.60562	0.014782			3.60228	0.0146851			3.60395	0.0189692			3.6052	0.0236705			3.60542	0.00614673			3.60478	0.0143424			3.60228	-0.0109747
3.61228	0.0215843			3.60728	0.0328198			3.61062	0.0229627			3.61228	0.0308603			3.60875	0.00972301			3.61228	0.0145063			3.60895	0.0147969			3.61062	0.0200793			3.61187	0.0240207			3.61208	0.00626594			3.61145	0.0145733			3.60895	-0.0120252
3.61895	0.0228286			3.61395	0.0330284			3.61728	0.0234172			3.61895	0.0310466			3.61542	0.0103116			3.61895	0.0144094			3.61562	0.0146702			3.61728	0.0209436			3.61853	0.0240058			3.61875	0.00654161			3.61812	0.0145286			3.61562	-0.013113
3.62562	0.023216			3.62062	0.032708			3.62395	0.0237897			3.62562	0.031352			3.62208	0.0103861			3.62562	0.0147894			3.62228	0.0149459			3.62395	0.0215024			3.6252	0.0238046			3.62542	0.00720471			3.62478	0.0146627			3.62228	-0.014089
3.63228	0.0225529			3.62728	0.0320375			3.63062	0.0239536			3.63228	0.0316054			3.62875	0.0101402			3.63228	0.0155792			3.62895	0.015527			3.63062	0.0216737			3.63187	0.0236183			3.63208	0.00792742			3.63145	0.0147074			3.62895	-0.0141263
3.63895	0.0213087			3.63395	0.0311434			3.63728	0.0235587			3.63895	0.0319481			3.63542	0.010334			3.63895	0.0160858			3.63562	0.0161678			3.63728	0.0214204			3.63853	0.0234842			3.63875	0.00850111			3.63812	0.0146925			3.63562	-0.0132248
3.64562	0.0197366			3.64062	0.0301674			3.64395	0.0224337			3.64562	0.0320002			3.64208	0.0108182			3.64562	0.0159144			3.64228	0.0166371			3.64395	0.0206083			3.6452	0.023298			3.64542	0.00909716			3.64478	0.0145063			3.64228	-0.0120625
3.65228	0.0184253			3.64728	0.0292659			3.65062	0.020951			3.65228	0.0315532			3.64875	0.0114441			3.65228	0.015676			3.64895	0.0169799			3.65062	0.019908			3.65187	0.022836			3.65208	0.00973791			3.65145	0.0143573			3.64895	-0.0113472
3.65895	0.0175536			3.65395	0.0290424			3.65728	0.0200644			3.65895	0.0305325			3.65542	0.0116304			3.65895	0.0157654			3.65562	0.0175089			3.65728	0.0197962			3.65853	0.0223517			3.65875	0.0103563			3.65812	0.0142902			3.65562	-0.0108257
3.66562	0.0172257			3.66062	0.0297502			3.66395	0.019908			3.66562	0.0299141			3.66208	0.012137			3.66562	0.0157878			3.66228	0.0176877			3.66395	0.0197515			3.6652	0.0222996			3.66542	0.0102967			3.66478	0.0142902			3.66228	-0.0100285
3.67228	0.0172928			3.66728	0.0307336			3.67062	0.0203624			3.67228	0.0300631			3.66875	0.0129864			3.67228	0.0152588			3.66895	0.0174642			3.67062	0.0196621			3.67187	0.0225678			3.67208	0.0096634			3.67145	0.0142828			3.66895	-0.009574
3.67895	0.0179037			3.67395	0.0316352			3.67728	0.0211596			3.67895	0.0303909			3.67542	0.0139028			3.67895	0.0146329			3.67562	0.0170767			3.67728	0.0195205			3.67853	0.0229329			3.67875	0.00843406			3.67812	0.0144094			3.67562	-0.00953674
3.68562	0.0186116			3.68062	0.0325292			3.68395	0.022158			3.68562	0.0304505			3.68208	0.0144467			3.68562	0.0149459			3.68228	0.0168607			3.68395	0.0197962			3.6852	0.0232086			3.68542	0.00713021			3.68478	0.0143573			3.68228	-0.00999123
3.69228	0.0186041			3.68728	0.0335425			3.69062	0.0231266			3.69228	0.0303835			3.68875	0.014402			3.69228	0.0159591			3.68895	0.0166297			3.69062	0.020057			3.69187	0.0232384			3.69208	0.00612438			3.69145	0.0139102			3.68895	-0.0105277
3.69895	0.0178143			3.69395	0.0343695			3.69728	0.0234619			3.69895	0.0307411			3.69542	0.0140294			3.69895	0.0167415			3.69562	0.0160336			3.69728	0.0202209			3.69853	0.0229701			3.69875	0.00547618			3.69812	0.0131503			3.69562	-0.0111908
3.70562	0.0170693			3.70062	0.0344515			3.70395	0.0230744			3.70562	0.0310987			3.70208	0.013113			3.70562	0.017412			3.70228	0.0152886			3.70395	0.0205189			3.7052	0.0223741			3.70542	0.00552833			3.70478	0.012286			3.70228	-0.0119582
3.71228	0.0167936			3.70728	0.0336915			3.71062	0.0222027			3.71228	0.0311807			3.70875	0.0122786			3.71228	0.0185147			3.70895	0.0149235			3.71062	0.0212044			3.71187	0.0219047			3.71208	0.00594556			3.71145	0.011839			3.70895	-0.012584
3.71895	0.0166669			3.71395	0.0324696			3.71728	0.0215694			3.71895	0.0313148			3.71542	0.0119284			3.71895	0.0197813			3.71562	0.014931			3.71728	0.02186			3.71853	0.0216439			3.71875	0.00678748			3.71812	0.0115409			3.71562	-0.0131503
3.72562	0.0167415			3.72062	0.0312626			3.72395	0.0214577			3.72562	0.0318214			3.72208	0.0122115			3.72562	0.0202805			3.72228	0.0149533			3.72395	0.0219345			3.7252	0.0217408			3.72542	0.00753254			3.72478	0.0113249			3.72228	-0.0132844
3.73228	0.0173375			3.72728	0.0302643			3.73062	0.0218898			3.73228	0.0324175			3.72875	0.0125989			3.73228	0.0201762			3.72895	0.0149533			3.73062	0.0219643			3.73187	0.0224039			3.73208	0.00809133			3.73145	0.0111386			3.72895	-0.0128895
3.73895	0.0184923			3.73395	0.0291541			3.73728	0.0224933			3.73895	0.032708			3.73542	0.0126213			3.73895	0.0203773			3.73562	0.014998			3.73728	0.0218451			3.73853	0.0229999			3.73875	0.0083074			3.73812	0.0111833			3.73562	-0.0120923
3.74562	0.0195354			3.74062	0.0280812			3.74395	0.0229403			3.74562	0.0327751			3.74208	0.0125617			3.74562	0.020884			3.74228	0.0152215			3.74395	0.0215098			3.7452	0.0233576			3.74542	0.0082776			3.74478	0.0113919			3.74228	-0.0114962
3.75228	0.0201762			3.74728	0.0276119			3.75062	0.0233874			3.75228	0.0322536			3.74875	0.0123605			3.75228	0.0208914			3.74895	0.0153482			3.75062	0.0207424			3.75187	0.0232384			3.75208	0.00852346			3.75145	0.0115484			3.74895	-0.0110641
3.75895	0.0203997			3.75395	0.0278577			3.75728	0.0239164			3.75895	0.0311732			3.75542	0.01169			3.75895	0.0203624			3.75562	0.01546			3.75728	0.0203773			3.75853	0.0231042			3.75875	0.009045			3.75812	0.0116006			3.75562	-0.0106096
3.76562	0.0203475			3.76062	0.0285134			3.76395	0.0242591			3.76562	0.0300631			3.76208	0.0104532			3.76562	0.0199676			3.76228	0.0155196			3.76395	0.0206754			3.7652	0.0230595			3.76542	0.00964105			3.76478	0.0119731			3.76228	-0.0103489
3.77228	0.0200272			3.76728	0.0292808			3.77062	0.023894			3.77228	0.0296906			3.76875	0.00937283			3.77228	0.0198632			3.76895	0.0154078			3.77062	0.0211149			3.77187	0.0227168			3.77208	0.00977516			3.77145	0.0125766			3.76895	-0.0103638
3.77895	0.0193417			3.77395	0.030227			3.77728	0.0230595			3.77895	0.030227			3.77542	0.00911206			3.77895	0.0196546			3.77562	0.015229			3.77728	0.0211149			3.77853	0.0224933			3.77875	0.00984967			3.77812	0.0131875			3.77562	-0.0101998
3.78562	0.0181496			3.78062	0.0312999			3.78395	0.0222325			3.78562	0.0305995			3.78208	0.00923872			3.78562	0.0190884			3.78228	0.0155196			3.78395	0.0207797			3.7852	0.0225455			3.78542	0.01017			3.78478	0.0137389			3.78228	-0.00971556
3.79228	0.0169724			3.78728	0.0321791			3.79062	0.0215024			3.79228	0.0312105			3.78875	0.00942498			3.79228	0.0187531			3.78895	0.0162795			3.79062	0.0201538			3.79187	0.0228733			3.79208	0.010699			3.79145	0.0144616			3.78895	-0.00923872
3.79895	0.0163391			3.79395	0.0328049			3.79728	0.0204593			3.79895	0.0321791			3.79542	0.00964105			3.79895	0.0187308			3.79562	0.0168085			3.79728	0.0194013			3.79853	0.0228062			3.79875	0.0112206			3.79812	0.0151098			3.79562	-0.00890344
3.80562	0.0164583			3.80062	0.032872			3.80395	0.0194013			3.80562	0.0333861			3.80208	0.0101402			3.80562	0.0187159			3.80228	0.0167117			3.80395	0.0187084			3.8052	0.0221208			3.80542	0.0113845			3.80478	0.0151172			3.80228	-0.008367
3.81228	0.0168681			3.80728	0.032559			3.81062	0.0189766			3.81228	0.0340939			3.80875	0.0106096			3.81228	0.0182912			3.80895	0.0161678			3.81062	0.018172			3.81187	0.0214428			3.81208	0.0111088			3.81145	0.0146702			3.80895	-0.00762194
3.81895	0.0174493			3.81395	0.032492			3.81728	0.0191331			3.81895	0.0339374			3.81542	0.0109226			3.81895	0.017494			3.81562	0.0156611			3.81728	0.01809			3.81853	0.0212044			3.81875	0.0104904			3.81812	0.0142902			3.81562	-0.00706315
3.82562	0.0181943			3.82062	0.032872			3.82395	0.0196621			3.82562	0.0338033			3.82208	0.0111908			3.82562	0.0167266			3.82228	0.0153407			3.82395	0.0184402			3.8252	0.0210032			3.82542	0.00976026			3.82478	0.0140592			3.82228	-0.00678748
3.83228	0.0186563			3.82728	0.03355			3.83062	0.0203624			3.83228	0.0335276			3.82875	0.0111684			3.83228	0.0158772			3.82895	0.0150129			3.83062	0.0193939			3.83187	0.0205338			3.83208	0.00935048			3.83145	0.0133961			3.82895	-0.00669807
3.83895	0.0185743			3.83395	0.0341758			3.83728	0.0212863			3.83895	0.0331402			3.83542	0.0109002			3.83895	0.0148565			3.83562	0.0146627			3.83728	0.0204295			3.83853	0.0198483			3.83875	0.00925362			3.83812	0.0126585			3.83562	-0.00698864
3.84562	0.0182688			3.84062	0.0351146			3.84395	0.0219271			3.84562	0.0328422			3.84208	0.0108555			3.84562	0.014089			3.84228	0.014551			3.84395	0.0210106			3.8452	0.019148			3.84542	0.00954419			3.84478	0.0122115			3.84228	-0.00757724
3.85228	0.0179633			3.84728	0.0361502			3.85062	0.0218004			3.85228	0.0329241			3.84875	0.0112578			3.85228	0.0139251			3.84895	0.0151545			3.85062	0.0211224			3.85187	0.0185296			3.85208	0.0101924			3.85145	0.0120476			3.84895	-0.00847131
3.85895	0.0177994			3.85395	0.0365451			3.85728	0.0213087			3.85895	0.0333562			3.85542	0.0114739			3.85895	0.014618			3.85562	0.0163168			3.85728	0.0210181			3.85853	0.0177845			3.85875	0.0108257			3.85812	0.0122637			3.85562	-0.00929087
3.86562	0.0181124			3.86062	0.0363216			3.86395	0.0211224			3.86562	0.0335872			3.86208	0.0111982			3.86562	0.0154749			3.86228	0.0170544			3.86395	0.0207275			3.8652	0.0172257			3.86542	0.0111237			3.86478	0.0129342			3.86228	-0.00998378
3.87228	0.0191182			3.86728	0.0360087			3.87062	0.0211			3.87228	0.0336692			3.86875	0.0110865			3.87228	0.0160411			3.86895	0.0175014			3.87062	0.020057			3.87187	0.0168458			3.87208	0.0107661			3.87145	0.0138655			3.86895	-0.0105873
3.87895	0.0202358			3.87395	0.0362024			3.87728	0.0208542			3.87895	0.0336841			3.87542	0.0115559			3.87895	0.0162795			3.87562	0.0179335			3.87728	0.0193045			3.87853	0.0167862			3.87875	0.00999868			3.87812	0.0143871			3.87562	-0.0106543
3.88562	0.0205934			3.88062	0.036329			3.88395	0.0203922			3.88562	0.0334159			3.88208	0.0120401			3.88562	0.0162348			3.88228	0.0184551			3.88395	0.0188202			3.8852	0.0174269			3.88542	0.00923127			3.88478	0.0147671			3.88228	-0.0103116
3.89228	0.0204816			3.88728	0.0360906			3.89062	0.0202805			3.89228	0.0331327			3.88875	0.0121072			3.89228	0.0159219			3.88895	0.018537			3.89062	0.0185817			3.89187	0.0182912			3.89208	0.00876933			3.89145	0.0156835			3.88895	-0.00959635
3.89895	0.0202134			3.89395	0.0358522			3.89728	0.0209808			3.89895	0.033021			3.89542	0.0120252			3.89895	0.0152811			3.89562	0.0181422			3.89728	0.0187308			3.89853	0.0191703			3.89875	0.00850856			3.89812	0.0170246			3.89562	-0.00929832
3.90562	0.0199601			3.90062	0.0359043			3.90395	0.0217855			3.90562	0.0334606			3.90208	0.0118166			3.90562	0.0146255			3.90228	0.0176653			3.90395	0.0190586			3.9052	0.0197291			3.90542	0.0083074			3.90478	0.018023			3.90228	-0.00935793
3.91228	0.0196472			3.90728	0.0362173			3.91062	0.0225231			3.91228	0.0341609			3.90875	0.0113025			3.91228	0.0145063			3.90895	0.0173748			3.91062	0.0194684			3.91187	0.0202432			3.91208	0.00803918			3.91145	0.0186339			3.90895	-0.00926852
3.91895	0.019826			3.91395	0.0361428			3.91728	0.0226945			3.91895	0.0347942			3.91542	0.0104606			3.91895	0.0150427			3.91562	0.0173226			3.91728	0.0194311			3.91853	0.0206381			3.91875	0.0077337			3.91812	0.019215			3.91562	-0.00917912
3.92562	0.0205636			3.92062	0.0360012			3.92395	0.0226125			3.92562	0.0350475			3.92208	0.00986457			3.92562	0.0156462			3.92228	0.0173822			3.92395	0.0189841			3.9252	0.0203624			3.92542	0.00743568			3.92478	0.0197813			3.92228	-0.00926107
3.93228	0.0213832			3.92728	0.0362843			3.93062	0.0223145			3.93228	0.0349805			3.92875	0.00956655			3.93228	0.0158474			3.92895	0.0175238			3.93062	0.0188127			3.93187	0.0198409			3.93208	0.00740588			3.93145	0.0200048			3.92895	-0.00967085
3.93895	0.0219494			3.93395	0.0367314			3.93728	0.0215322			3.93895	0.0350922			3.93542	0.00920147			3.93895	0.0157505			3.93562	0.0177622			3.93728	0.018701			3.93853	0.0191107			3.93875	0.00751019			3.93812	0.0189841			3.93562	-0.0100434
3.94562	0.0220835			3.94062	0.0371933			3.94395	0.0204295			3.94562	0.0351593			3.94208	0.0089258			3.94562	0.0159666			3.94228	0.0182018			3.94395	0.0187531			3.9452	0.0184327			3.94542	0.0076592			3.94478	0.0170767			3.94228	-0.0103936
3.95228	0.0217482			3.94728	0.0372604			3.95062	0.0193343			3.95228	0.0351146			3.94875	0.00900775			3.95228	0.0164732			3.94895	0.0184923			3.95062	0.0187233			3.95187	0.0176355			3.95208	0.00759959			3.95145	0.01508			3.94895	-0.0105873
3.95895	0.0211149			3.95395	0.0376329			3.95728	0.0189766			3.95895	0.0348389			3.95542	0.00946224			3.95895	0.0170842			3.95562	0.0183508			3.95728	0.019066			3.95853	0.0170171			3.95875	0.00765175			3.95812	0.0138953			3.95562	-0.0103191
3.96562	0.0204742			3.96062	0.0381693			3.96395	0.0193268			3.96562	0.0348985			3.96208	0.00975281			3.96562	0.0180826			3.96228	0.0179112			3.96395	0.0198111			3.9652	0.0170693			3.96542	0.00785291			3.96478	0.0136867			3.96228	-0.00986457
3.97228	0.0200495			3.96728	0.0382587			3.97062	0.0200048			3.97228	0.0349879			3.96875	0.00996143			3.97228	0.0195205			3.96895	0.0174865			3.97062	0.0205711			3.97187	0.0175983			3.97208	0.00777841			3.97145	0.0135377			3.96895	-0.00946969
3.97895	0.0196397			3.97395	0.0376478			3.97728	0.0207871			3.97895	0.0347644			3.97542	0.0106022			3.97895	0.0207052			3.97562	0.0170618			3.97728	0.0214875			3.97853	0.0183135			3.97875	0.00739098			3.97812	0.0135675			3.97562	-0.009045
3.98562	0.0191554			3.98062	0.0365153			3.98395	0.021331			3.98562	0.0342578			3.98208	0.0115559			3.98562	0.0209287			3.98228	0.0164658			3.98395	0.0224784			3.9852	0.0185147			3.98542	0.00681728			3.98478	0.0138059			3.98228	-0.0083819
3.99228	0.0187606			3.98728	0.0357032			3.99062	0.0213981			3.99228	0.0339895			3.98875	0.0123903			3.99228	0.0202656			3.98895	0.0157803			3.99062	0.0234097			3.99187	0.0184774			3.99208	0.00668317			3.99145	0.0140741			3.98895	-0.00792742
3.99895	0.018388			3.99395	0.034906			3.99728	0.0213087			3.99895	0.0342429			3.99542	0.0128299			3.99895	0.0191182			3.99562	0.0155419			3.99728	0.0238642			3.99853	0.0185221			3.99875	0.00668317			3.99812	0.0140816			3.99562	-0.00788271
4.00562	0.0182092			4.00062	0.0339523			4.00395	0.0212416			4.00562	0.0344589			4.00208	0.0130087			4.00562	0.0174195			4.00228	0.0157505			4.00395	0.0237674			4.0052	0.0185147			4.00542	0.00667572			4.00478	0.0131875			4.00228	-0.00803918
4.01228	0.0184104			4.00728	0.0328794			4.01062	0.021331			4.01228	0.0343919			4.00875	0.0128523			4.01228	0.0155047			4.00895	0.016138			4.01062	0.0234172			4.01187	0.0185594			4.01208	0.00676513			4.01145	0.0121668			4.00895	-0.0083521
4.01895	0.0190809			4.01395	0.0324622			4.01728	0.0213459			4.01895	0.0338703			4.01542	0.0122637			4.01895	0.0142232			4.01562	0.0165701			4.01728	0.0230968			4.01853	0.0187159			4.01875	0.00712276			4.01812	0.0118092			4.01562	-0.00854582
4.02562	0.0199154			4.02062	0.0326335			4.02395	0.0213832			4.02562	0.0334084			4.02208	0.0117049			4.02562	0.0139996			4.02228	0.0170022			4.02395	0.0228733			4.0252	0.0194982			4.02542	0.00750273			4.02478	0.0124127			4.02228	-0.00844151
4.03228	0.0206903			4.02728	0.0332817			4.03062	0.0214726			4.03228	0.0332668			4.02875	0.0112802			4.03228	0.0144541			4.02895	0.0173599			4.03062	0.0228137			4.03187	0.0204667			4.03208	0.00762939			4.03145	0.0134483			4.02895	-0.00777841
4.03895	0.0211596			4.03395	0.0337884			4.03728	0.0212416			4.03895	0.0332445			4.03542	0.0111684			4.03895	0.0152662			4.03562	0.0175387			4.03728	0.0229478			4.03853	0.0212416			4.03875	0.00797212			4.03812	0.0140592			4.03562	-0.00704825
4.04562	0.021331			4.04062	0.0342876			4.04395	0.0209436			4.04562	0.0334233			4.04208	0.0111312			4.04562	0.0159219			4.04228	0.0176206			4.04395	0.0233278			4.0452	0.021778			4.04542	0.00862032			4.04478	0.014469			4.04228	-0.00663102
4.05228	0.0211298			4.04728	0.0351891			4.05062	0.0207275			4.05228	0.033848			4.04875	0.0111535			4.05228	0.0164807			4.04895	0.0175759			4.05062	0.0237077			4.05187	0.0218824			4.05208	0.00945479			4.05145	0.014782			4.04895	-0.00666082
4.05895	0.0206083			4.05395	0.0362098			4.05728	0.0206679			4.05895	0.034757			4.05542	0.0112876			4.05895	0.0166968			4.05562	0.0172481			4.05728	0.023663			4.05853	0.0218749			4.05875	0.0100881			4.05812	0.0146255			4.05562	-0.00712276
4.06562	0.0201389			4.06062	0.0370517			4.06395	0.0203922			4.06562	0.0355169			4.06208	0.0116527			4.06562	0.016816			4.06228	0.0166297			4.06395	0.0233501			4.0652	0.0218302			4.06542	0.0105873			4.06478	0.0139624			4.06228	-0.00768155
4.07228	0.0200123			4.06728	0.0370741			4.07062	0.0200123			4.07228	0.0354499			4.06875	0.0124127			4.07228	0.0169724			4.06895	0.0161454			4.07062	0.0231415			4.07187	0.0217855			4.07208	0.0109002			4.07145	0.0134706			4.06895	-0.00817329
4.07895	0.0203177			4.07395	0.0369996			4.07728	0.0202283			4.07895	0.034906			4.07542	0.0129715			4.07895	0.017114			4.07562	0.0157431			4.07728	0.0235215			4.07853	0.0214651			4.07875	0.0108406			4.07812	0.0135079			4.07562	-0.00847876
4.08562	0.0206977			4.08062	0.0370294			4.08395	0.0210404			4.08562	0.0341684			4.08208	0.0131726			4.08562	0.0172853			4.08228	0.0153705			4.08395	0.0240803			4.0852	0.0207424			4.08542	0.0104532			4.08478	0.0136495			4.08228	-0.00869483
4.09228	0.0206828			4.08728	0.0368357			4.09062	0.0219718			4.09228	0.0337735			4.08875	0.0132322			4.09228	0.0174418			4.08895	0.0148937			4.09062	0.0242069			4.09187	0.020124			4.09208	0.0100955			4.09145	0.0131205			4.08895	-0.00856072
4.09895	0.020355			4.09395	0.0365302			4.09728	0.0225306			4.09895	0.0336617			4.09542	0.0131801			4.09895	0.0175014			4.09562	0.0145808			4.09728	0.0235364			4.09853	0.0197217			4.09875	0.0100806			4.09812	0.0125244			4.09562	-0.00831485
4.10562	0.0199899			4.10062	0.0364035			4.10395	0.0229478			4.10562	0.0341237			4.10208	0.0127554			4.10562	0.0173822			4.10228	0.014402			4.10395	0.0224262			4.1052	0.0196174			4.10542	0.0105873			4.10478	0.0124797			4.10228	-0.00861287
4.11228	0.0198036			4.10728	0.0365004			4.11062	0.0232384			4.11228	0.0354871			4.10875	0.0119433			4.11228	0.0172481			4.10895	0.0141189			4.11062	0.0216439			4.11187	0.0199303			4.11208	0.0111014			4.11145	0.0124648			4.10895	-0.00941008
4.11895	0.0196397			4.11395	0.0360161			4.11728	0.0231266			4.11895	0.03732			4.11542	0.0113025			4.11895	0.0169724			4.11562	0.0138655			4.11728	0.0210926			4.11853	0.0206232			4.11875	0.0111461			4.11812	0.0123084			4.11562	-0.010021
4.12562	0.0195205			4.12062	0.0349656			4.12395	0.0224933			4.12562	0.0392944			4.12208	0.0110641			4.12562	0.0170842			4.12228	0.0139326			4.12395	0.020735			4.1252	0.0215024			4.12542	0.0108629			4.12478	0.0123382			4.12228	-0.00999868
4.13228	0.0197291			4.12728	0.0340194			4.13062	0.021942			4.13228	0.0405759			4.12875	0.0111312			4.13228	0.0175908			4.12895	0.0143424			4.13062	0.0206232			4.13187	0.0221953			4.13208	0.0103116			4.13145	0.0132546			4.12895	-0.00955909
4.13895	0.0202358			4.13395	0.033319			4.13728	0.0216514			4.13895	0.0412762			4.13542	0.0116006			4.13895	0.0182465			4.13562	0.0148788			4.13728	0.0212491			4.13853	0.0226796			4.13875	0.00947714			4.13812	0.0144318			4.13562	-0.00914931
4.14562	0.0207871			4.14062	0.0325069			4.14395	0.0218004			4.14562	0.0412911			4.14208	0.0122488			4.14562	0.0187904			4.14228	0.0154376			4.14395	0.0225231			4.1452	0.0228062			4.14542	0.00794232			4.14478	0.0150129			4.14228	-0.00865757
4.15228	0.0209063			4.14728	0.0316873			4.15062	0.0223815			4.15228	0.040248			4.14875	0.0128523			4.15228	0.0190586			4.14895	0.0161454			4.15062	0.0235736			4.15187	0.0224561			4.15208	0.00637025			4.15145	0.0151917			4.14895	-0.0082776
4.15895	0.0206307			4.15395	0.0313222			4.15728	0.0232682			4.15895	0.038363			4.15542	0.0131726			4.15895	0.0194162			4.15562	0.0169426			4.15728	0.024043			4.15853	0.0222847			4.15875	0.00536442			4.15812	0.0150129			4.15562	-0.00872463
4.16562	0.0201315			4.16062	0.0313222			4.16395	0.0241697			4.16562	0.0365451			4.16208	0.0131726			4.16562	0.0195876			4.16228	0.0174344			4.16395	0.0241548			4.1652	0.0223815			4.16542	0.00485778			4.16478	0.0145733			4.16228	-0.00973046
4.17228	0.019744			4.16728	0.0315383			4.17062	0.0243559			4.17228	0.0357404			4.16875	0.0128448			4.17228	0.0192523			4.16895	0.0177771			4.17062	0.0241473			4.17187	0.022538			4.17208	0.00463426			4.17145	0.0138655			4.16895	-0.0107288
4.17895	0.0197142			4.17395	0.0319183			4.17728	0.0244081			4.17895	0.035733			4.17542	0.0121146			4.17895	0.01885			4.17562	0.0180602			4.17728	0.0239313			4.17853	0.0223517			4.17875	0.00471622			4.17812	0.0131056			4.17562	-0.0110865
4.18562	0.0198632			4.18062	0.0328124			4.18395	0.0245273			4.18562	0.0361726			4.18208	0.0116453			4.18562	0.0186488			4.18228	0.0188351			4.18395	0.0234097			4.1852	0.0219643			4.18542	0.00558048			4.18478	0.0126064			4.18228	-0.0109896
4.19228	0.0198483			4.18728	0.0341535			4.19062	0.0249743			4.19228	0.0375733			4.18875	0.0115931			4.19228	0.01847			4.18895	0.0197068			4.19062	0.0229105			4.19187	0.022009			4.19208	0.00694394			4.19145	0.0122041			4.18895	-0.0105277
4.19895	0.0198409			4.19395	0.0356585			4.19728	0.0254363			4.19895	0.0396818			4.19542	0.01169			4.19895	0.0181273			4.19562	0.0201091			4.19728	0.0227913			4.19853	0.0219941			4.19875	0.00809878			4.19812	0.0123978			4.19562	-0.00955909
4.20562	0.0200421			4.20062	0.0372678			4.20395	0.0259653			4.20562	0.0413358			4.20208	0.0116453			4.20562	0.0178218			4.20228	0.0199527			4.20395	0.0228062			4.2052	0.0220463			4.20542	0.00861287			4.20478	0.0130758			4.20228	-0.00844896
4.21228	0.0205487			4.20728	0.0387952			4.21062	0.0266731			4.21228	0.041917			4.20875	0.011459			4.21228	0.0178143			4.20895	0.0196472			4.21062	0.0226274			4.21187	0.0220239			4.21208	0.00869483			4.21145	0.0138208			4.20895	-0.00762939
4.21895	0.0209659			4.21395	0.0400618			4.21728	0.0268295			4.21895	0.0414699			4.21542	0.0115708			4.21895	0.0176951			4.21562	0.0192747			4.21728	0.0224337			4.21853	0.0221059			4.21875	0.00868738			4.21812	0.0143051			4.21562	-0.00740588
4.22562	0.021182			4.22062	0.0405684			4.22395	0.0264794			4.22562	0.0406578			4.22208	0.0115484			4.22562	0.0169724			4.22228	0.018537			4.22395	0.0225306			4.2252	0.0219494			4.22542	0.00849366			4.22478	0.0145286			4.22228	-0.00758469
4.23228	0.0214949			4.22728	0.0399053			4.23062	0.0256523			4.23228	0.039503			4.22875	0.0111014			4.23228	0.0161678			4.22895	0.0178292			4.23062	0.0230297			4.23187	0.0214279			4.23208	0.00798702			4.23145	0.014931			4.22895	-0.00824779
4.23895	0.021778			4.23395	0.0386983			4.23728	0.0246316			4.23895	0.0384524			4.23542	0.0104979			4.23895	0.0157803			4.23562	0.0178367			4.23728	0.0231415			4.23853	0.0205562			4.23875	0.00760704			4.23812	0.0151843			4.23562	-0.0089854
4.24562	0.02186			4.24062	0.0375062			4.24395	0.0234321			4.24562	0.0379607			4.24208	0.0101775			4.24562	0.0160187			4.24228	0.0185892			4.24395	0.0228733			4.2452	0.0194013			4.24542	0.00742078			4.24478	0.0151694			4.24228	-0.00979006
4.25228	0.0214949			4.24728	0.0365973			4.25062	0.0225678			4.25228	0.0380278			4.24875	0.0106096			4.25228	0.0166446			4.24895	0.0192598			4.25062	0.0226498			4.25187	0.018537			4.25208	0.00714511			4.25145	0.0152811			4.24895	-0.0106171
4.25895	0.0209734			4.25395	0.0358373			4.25728	0.0224933			4.25895	0.0383556			4.25542	0.0111088			4.25895	0.0176877			4.25562	0.0197962			4.25728	0.0221133			4.25853	0.0180528			4.25875	0.00672042			4.25812	0.0158846			4.25562	-0.0111759
4.26562	0.0206605			4.26062	0.0351369			4.26395	0.0227019			4.26562	0.038825			4.26208	0.0117719			4.26562	0.0189841			4.26228	0.0203028			4.26395	0.0209734			4.2652	0.0182018			4.26542	0.00658631			4.26478	0.0168011			4.26228	-0.0112653
4.27228	0.0203326			4.26728	0.0349507			4.27062	0.0229478			4.27228	0.0391603			4.26875	0.0124797			4.27228	0.0197887			4.26895	0.0205934			4.27062	0.0193119			4.27187	0.0187606			4.27208	0.00672787			4.27145	0.0175387			4.26895	-0.010699
4.27895	0.0201166			4.27395	0.0349656			4.27728	0.0232011			4.27895	0.039205			4.27542	0.0130013			4.27895	0.0195652			4.27562	0.0206158			4.27728	0.0181645			4.27853	0.0197291			4.27875	0.00663847			4.27812	0.0178665			4.27562	-0.0100136
4.28562	0.0200644			4.28062	0.0347868			4.28395	0.0234619			4.28562	0.0385717			4.28208	0.0129491			4.28562	0.0185817			4.28228	0.020504			4.28395	0.0177473			4.2852	0.0208989			4.28542	0.00667572			4.28478	0.0182241			4.28228	-0.00920892
4.29228	0.0205263			4.28728	0.0343695			4.29062	0.0229552			4.29228	0.0373721			4.28875	0.0123307			4.29228	0.0177696			4.28895	0.0209734			4.29062	0.0176579			4.29187	0.0216588			4.29208	0.00730157			4.29145	0.0183582			4.28895	-0.00825524
4.29895	0.0213534			4.29395	0.0339895			4.29728	0.0221133			4.29895	0.0362694			4.29542	0.0120774			4.29895	0.0169352			4.29562	0.0217035			4.29728	0.0180975			4.29853	0.0220239			4.29875	0.00814348			4.29812	0.0182539			4.29562	-0.00737607
4.30562	0.0218228			4.30062	0.0342578			4.30395	0.0214726			4.30562	0.0356957			4.30208	0.0122041			4.30562	0.015974			4.30228	0.0222325			4.30395	0.0188574			4.3052	0.0221655			4.30542	0.00861287			4.30478	0.0179037			4.30228	-0.00665337
4.31228	0.0220612			4.30728	0.0352561			4.31062	0.0212491			4.31228	0.0355467			4.30875	0.0127703			4.31228	0.015378			4.30895	0.0222921			4.31062	0.0199229			4.31187	0.0220686			4.31208	0.00888854			4.31145	0.0177026			4.30895	-0.00661612
4.31895	0.0219196			4.31395	0.0364259			4.31728	0.0211895			4.31895	0.0354648			4.31542	0.0134334			4.31895	0.0158101			4.31562	0.0216737			4.31728	0.0208318			4.31853	0.0217408			4.31875	0.00940263			4.31812	0.0179857			4.31562	-0.00701845
4.32562	0.0216365			4.32062	0.0376701			4.32395	0.0210926			4.32562	0.0356138			4.32208	0.0142306			4.32562	0.0167936			4.32228	0.0206903			4.32395	0.021562			4.3252	0.0213459			4.32542	0.00988692			4.32478	0.0182241			4.32228	-0.00792742
4.33228	0.0209808			4.32728	0.0386462			4.33062	0.021562			4.33228	0.0359565			4.32875	0.014931			4.33228	0.0170171			4.32895	0.0192076			4.33062	0.0219941			4.33187	0.0211671			4.33208	0.00982732			4.33145	0.0183582			4.32895	-0.00902265
4.33895	0.020124			4.33395	0.0392646			4.33728	0.0220239			4.33895	0.0360459			4.33542	0.0153184			4.33895	0.0165999			4.33562	0.0176728			4.33728	0.0222549			4.33853	0.0210851			4.33875	0.0096634			4.33812	0.0181869			4.33562	-0.00970066
4.34562	0.0200272			4.34062	0.0389516			4.34395	0.0223368			4.34562	0.0353605			4.34208	0.0153482			4.34562	0.0162199			4.34228	0.0164956			4.34395	0.0224635			4.3452	0.020802			4.34542	0.00936538			4.34478	0.0182018			4.34228	-0.00990182
4.35228	0.0206828			4.34728	0.0376329			4.35062	0.0225231			4.35228	0.0344142			4.34875	0.0150651			4.35228	0.016205			4.34895	0.0161231			4.35062	0.0223219			4.35187	0.0204593			4.35208	0.00914186			4.35145	0.0180453			4.34895	-0.00965595
4.35895	0.0213459			4.35395	0.0364408			4.35728	0.0225455			4.35895	0.0338405			4.35542	0.0148192			4.35895	0.0162721			4.35562	0.0166744			4.35728	0.021778			4.35853	0.020273			4.35875	0.00894815			4.35812	0.0175387			4.35562	-0.00947714
4.36562	0.0215247			4.36062	0.0357777			4.36395	0.0226125			4.36562	0.0337958			4.36208	0.0147969			4.36562	0.0163391			4.36228	0.0175387			4.36395	0.0213757			4.3652	0.0203848			4.36542	0.00903755			4.36478	0.0170469			4.36228	-0.00973791
4.37228	0.0215322			4.36728	0.0358			4.37062	0.0226051			4.37228	0.0341907			4.36875	0.0148788			4.37228	0.0168979			4.36895	0.0180975			4.37062	0.0217035			4.37187	0.0206679			4.37208	0.00932813			4.37145	0.0168607			4.36895	-0.0101328
4.37895	0.0218377			4.37395	0.0361577			4.37728	0.0232831			4.37895	0.0351444			4.37542	0.0146553			4.37895	0.0178739			4.37562	0.0181943			4.37728	0.022456			4.37853	0.0208393			4.37875	0.0096187			4.37812	0.0168905			4.37562	-0.0104979
4.38562	0.0219122			4.38062	0.0368953			4.38395	0.0245199			4.38562	0.0363886			4.38208	0.0142455			4.38562	0.0185743			4.38228	0.0180081			4.38395	0.0229999			4.3852	0.0208765			4.38542	0.00977516			4.38478	0.0164583			4.38228	-0.0103712
4.39228	0.0216141			4.38728	0.0378713			4.39062	0.0252724			4.39228	0.037387			4.38875	0.013791			4.39228	0.0185668			4.38895	0.0177771			4.39062	0.0231266			4.39187	0.0209808			4.39208	0.00935048			4.39145	0.0159964			4.38895	-0.0096038
4.39895	0.0215694			4.39395	0.0386909			4.39728	0.0252202			4.39895	0.037685			4.39542	0.0132248			4.39895	0.0180304			4.39562	0.0177026			4.39728	0.0232086			4.39853	0.0212789			4.39875	0.0082776			4.39812	0.0158548			4.39562	-0.00852346
4.40562	0.0219047			4.40062	0.0391304			4.40395	0.024572			4.40562	0.0375733			4.40208	0.0129938			4.40562	0.0176281			4.40228	0.0180826			4.40395	0.023149			4.4052	0.0213459			4.40542	0.00679493			4.40478	0.0158846			4.40228	-0.00694394
4.41228	0.0221878			4.40728	0.0392273			4.41062	0.0241771			4.41228	0.0373498			4.40875	0.0128821			4.41228	0.0173301			4.40895	0.0188723			4.41062	0.022769			4.41187	0.021264			4.41208	0.00554323			4.41145	0.0156835			4.40895	-0.00528991
4.41895	0.0221282			4.41395	0.0393242			4.41728	0.0235587			4.41895	0.0367388			4.41542	0.0128075			4.41895	0.0170991			4.41562	0.019595			4.41728	0.0220463			4.41853	0.0213832			4.41875	0.00452995			4.41812	0.0153184			4.41562	-0.00417233
4.42562	0.0219867			4.42062	0.0394806			4.42395	0.0226423			4.42562	0.0361651			4.42208	0.0123158			4.42562	0.0170618			4.42228	0.0197813			4.42395	0.0215471			4.4252	0.021778			4.42542	0.00376999			4.42478	0.0153929			4.42228	-0.0044778
4.43228	0.0218004			4.42728	0.0398308			4.43062	0.0224486			4.43228	0.0358149			4.42875	0.011757			4.43228	0.0174344			4.42895	0.0193715			4.43062	0.0218153			4.43187	0.0221431			4.43208	0.00349432			4.43145	0.0158995			4.42895	-0.00618398
4.43895	0.0215694			4.43395	0.040181			4.43728	0.0238717			4.43895	0.0360012			4.43542	0.0118315			4.43895	0.0178814			4.43562	0.0183061			4.43728	0.0222698			4.43853	0.0223741			4.43875	0.0038296			4.43812	0.0166297			4.43562	-0.00809133
4.44562	0.0214875			4.44062	0.040777			4.44395	0.0260547			4.44562	0.0362471			4.44208	0.011906			4.44562	0.0182167			4.44228	0.0169352			4.44395	0.0227615			4.4452	0.0226721			4.44542	0.00456721			4.44478	0.0174195			4.44228	-0.00947714
4.45228	0.0219196			4.44728	0.0413731			4.45062	0.0274554			4.45228	0.0362396			4.44875	0.0121295			4.45228	0.0185147			4.44895	0.0156909			4.45062	0.0232235			4.45187	0.0229403			4.45208	0.00550598			4.45145	0.01809			4.44895	-0.0103563
4.45895	0.022456			4.45395	0.0414178			4.45728	0.0280067			4.45895	0.0361651			4.45542	0.0123307			4.45895	0.0185892			4.45562	0.0149012			4.45728	0.0236109			4.45853	0.022769			4.45875	0.00653416			4.45812	0.0186339			4.45562	-0.01093
4.46562	0.0226274			4.46062	0.0410005			4.46395	0.0282824			4.46562	0.0360087			4.46208	0.0128597			4.46562	0.018321			4.46228	0.014849			4.46395	0.0236258			4.4652	0.022389			4.46542	0.00781566			4.46478	0.0189841			4.46228	-0.0112057
4.47228	0.022769			4.46728	0.0404119			4.47062	0.0282228			4.47228	0.0360683			4.46875	0.0131354			4.47228	0.0178665			4.46895	0.0152439			4.47062	0.0230968			4.47187	0.0220016			4.47208	0.00914186			4.47145	0.0192523			4.46895	-0.0108853
4.47895	0.0232607			4.47395	0.0399277			4.47728	0.027284			4.47895	0.03656			4.47542	0.0125691			4.47895	0.0178367			4.47562	0.0160187			4.47728	0.0225455			4.47853	0.0214651			4.47875	0.0103414			4.47812	0.0195354			4.47562	-0.0102744
4.48562	0.0238493			4.48062	0.0392571			4.48395	0.0258535			4.48562	0.0375286			4.48208	0.0115931			4.48562	0.0180975			4.48228	0.0167936			4.48395	0.0220835			4.4852	0.0205189			4.48542	0.0109449			4.48478	0.0197887			4.48228	-0.00977516
4.49228	0.0236258			4.48728	0.0385568			4.49062	0.0247136			4.49228	0.0386089			4.48875	0.0106096			4.49228	0.0182092			4.48895	0.0175759			4.49062	0.0218451			4.49187	0.0191256			4.49208	0.0108331			4.49145	0.0201315			4.48895	-0.00955909
4.49895	0.0225082			4.49395	0.0385493			4.49728	0.0240356			4.49895	0.0393465			4.49542	0.0101104			4.49895	0.0184476			4.49562	0.0180528			4.49728	0.022009			4.49853	0.0179857			4.49875	0.0105351			4.49812	0.0202879			4.49562	-0.00924617
4.50562	0.0214651			4.50062	0.0393018			4.50395	0.0239834			4.50562	0.0396073			4.50208	0.0100359			4.50562	0.0193194			4.50228	0.0182688			4.50395	0.0227988			4.5052	0.0173524			4.50542	0.0103787			4.50478	0.0200793			4.50228	-0.00879169
4.51228	0.0207648			4.50728	0.0405908			4.51062	0.0243485			4.51228	0.0394508			4.50875	0.0106245			4.51228	0.0206083			4.50895	0.0184476			4.51062	0.0237972			4.51187	0.0172108			4.51208	0.0103265			4.51145	0.0191778			4.50895	-0.00847131
4.51895	0.0201017			4.51395	0.0417829			4.51728	0.0249967			4.51895	0.0389144			4.51542	0.0119656			4.51895	0.0213459			4.51562	0.0185817			4.51728	0.0245869			4.51853	0.0172332			4.51875	0.00992417			4.51812	0.0178665			4.51562	-0.00853091
4.52562	0.0194386			4.52062	0.0424609			4.52395	0.0255555			4.52562	0.0383779			4.52208	0.0137463			4.52562	0.0209808			4.52228	0.0184551			4.52395	0.024803			4.5252	0.0176653			4.52542	0.00951439			4.52478	0.0165477			4.52228	-0.00853091
4.53228	0.0194088			4.52728	0.0427365			4.53062	0.026159			4.53228	0.0383034			4.52875	0.0150651			4.53228	0.0200719			4.52895	0.0177622			4.53062	0.0245869			4.53187	0.018999			4.53208	0.00949949			4.53145	0.0159293			4.52895	-0.00821799
4.53895	0.0204965			4.53395	0.0423938			4.53728	0.0270307			4.53895	0.0387281			4.53542	0.0155568			4.53895	0.019066			4.53562	0.0169352			4.53728	0.0245124			4.53853	0.0210181			4.53875	0.00965595			4.53812	0.0160635			4.53562	-0.00823289
4.54562	0.0221133			4.54062	0.0415668			4.54395	0.0276715			4.54562	0.0394583			4.54208	0.0152662			4.54562	0.0181273			4.54228	0.0161082			4.54395	0.0246689			4.5452	0.0229701			4.54542	0.00997633			4.54478	0.0166073			4.54228	-0.00870973
4.55228	0.0238046			4.54728	0.0401065			4.55062	0.0278354			4.55228	0.0400618			4.54875	0.0146925			4.55228	0.0169203			4.54895	0.015609			4.55062	0.0249371			4.55187	0.0240654			4.55208	0.0103936			4.55145	0.0170544			4.54895	-0.00939518
4.55895	0.0251755			4.55395	0.0386536			4.55728	0.0274628			4.55895	0.040397			4.55542	0.0139028			4.55895	0.0160262			4.55562	0.0154898			4.55728	0.0249669			4.55853	0.0246242			4.55875	0.0109747			4.55812	0.0172704			4.55562	-0.00987202
4.56562	0.0259802			4.56062	0.0376552			4.56395	0.0270307			4.56562	0.0403672			4.56208	0.0131652			4.56562	0.0158921			4.56228	0.0156313			4.56395	0.0248551			4.5652	0.0248477			4.56542	0.0113621			4.56478	0.0172779			4.56228	-0.010401
4.57228	0.0261962			4.56728	0.0368655			4.57062	0.0265911			4.57228	0.0400767			4.56875	0.0129566			4.57228	0.0163019			4.56895	0.0160709			4.57062	0.0247732			4.57187	0.0247955			4.57208	0.0111386			4.57145	0.0165552			4.56895	-0.0109896
4.57895	0.0256449			4.57395	0.0362322			4.57728	0.0259504			4.57895	0.0401661			4.57542	0.0131652			4.57895	0.0167862			4.57562	0.0168383			4.57728	0.0245273			4.57853	0.024423			4.57875	0.0104681			4.57812	0.015229			4.57562	-0.0113174
4.58562	0.0244826			4.58062	0.0359043			4.58395	0.0252277			4.58562	0.0406578			4.58208	0.0134557			4.58562	0.0167713			4.58228	0.0179112			4.58395	0.0241473			4.5852	0.0239909			4.58542	0.00933558			4.58478	0.0136569			4.58228	-0.0112951
4.59228	0.0230446			4.58728	0.0359043			4.59062	0.0246167			4.59228	0.0415593			4.58875	0.0132918			4.59228	0.0166148			4.58895	0.0185743			4.59062	0.0237599			4.59187	0.0241175			4.59208	0.00809133			4.59145	0.0129417			4.58895	-0.0108853
4.59895	0.021942			4.59395	0.0358298			4.59728	0.0243336			4.59895	0.0422746			4.59542	0.0131354			4.59895	0.0162572			4.59562	0.0185519			4.59728	0.0237003			4.59853	0.0246018			4.59875	0.00739843			4.59812	0.0127852			4.59562	-0.0102445
4.60562	0.0214055			4.60062	0.0357181			4.60395	0.0244752			4.60562	0.0426993			4.60208	0.0130609			4.60562	0.0160784			4.60228	0.0182986			4.60395	0.0240356			4.6052	0.0250638			4.60542	0.00745803			4.60478	0.0128001			4.60228	-0.00949204
4.61228	0.0214651			4.60728	0.0360981			4.61062	0.0249296			4.61228	0.042595			4.60875	0.0132844			4.61228	0.0160635			4.60895	0.0181198			4.61062	0.0247434			4.61187	0.024952			4.61208	0.00786781			4.61145	0.0128895			4.60895	-0.00919402
4.61895	0.0220165			4.61395	0.0368804			4.61728	0.0256225			4.61895	0.0418723			4.61542	0.0136122			4.61895	0.0160113			4.61562	0.0179633			4.61728	0.0252575			4.61853	0.0244528			4.61875	0.00819564			4.61812	0.0134781			4.61562	-0.00926107
4.62562	0.0227615			4.62062	0.0375211			4.62395	0.0267029			4.62562	0.0410825			4.62208	0.0141114			4.62562	0.0162125			4.62228	0.0177398			4.62395	0.0252128			4.6252	0.0239238			4.62542	0.00825524			4.62478	0.0145286			4.62228	-0.00935793
4.63228	0.0235885			4.62728	0.0381172			4.63062	0.0282824			4.63228	0.0402555			4.62875	0.0149235			4.63228	0.0168011			4.62895	0.0175834			4.63062	0.0246316			4.63187	0.0232831			4.63208	0.00813603			4.63145	0.0153407			4.62895	-0.00932068
4.63895	0.0241548			4.63395	0.0390708			4.63728	0.0298992			4.63895	0.0397414			4.63542	0.0156686			4.63895	0.0177622			4.63562	0.0175089			4.63728	0.0240132			4.63853	0.0227466			4.63875	0.00754744			4.63812	0.0159219			4.63562	-0.0090152
4.64562	0.0247881			4.64062	0.0403076			4.64395	0.0310317			4.64562	0.0393614			4.64208	0.0160635			4.64562	0.0183359			4.64228	0.0172183			4.64395	0.0237599			4.6452	0.0224933			4.64542	0.0064522			4.64478	0.0162423			4.64228	-0.00859797
4.65228	0.0254959			4.64728	0.0411272			4.65062	0.0315905			4.65228	0.0392869			4.64875	0.0156462			4.65228	0.0182465			4.64895	0.0171661			4.65062	0.0235289			4.65187	0.0229403			4.65208	0.00543147			4.65145	0.0162646			4.64895	-0.00781566
4.65895	0.0264943			4.65395	0.0414327			4.65728	0.0319183			4.65895	0.0393465			4.65542	0.0151321			4.65895	0.0178814			4.65562	0.0176877			4.65728	0.0234023			4.65853	0.0236183			4.65875	0.00485778			4.65812	0.0158772			4.65562	-0.00686944
4.66562	0.0274181			4.66062	0.0416636			4.66395	0.0317618			4.66562	0.0391901			4.66208	0.0150129			4.66562	0.0177622			4.66228	0.0185668			4.66395	0.0234097			4.6652	0.0239834			4.66542	0.00460446			4.66478	0.01508			4.66228	-0.00597537
4.67228	0.0275373			4.66728	0.0419617			4.67062	0.0307187			4.67228	0.0393167			4.66875	0.0150725			4.67228	0.0179261			4.66895	0.019215			4.67062	0.023894			4.67187	0.024125			4.67208	0.00436604			4.67145	0.0139102			4.66895	-0.00540167
4.67895	0.0271052			4.67395	0.0422299			4.67728	0.0293329			4.67895	0.0397861			4.67542	0.0150874			4.67895	0.0183582			4.67562	0.0196397			4.67728	0.0246987			4.67853	0.0240728			4.67875	0.00417978			4.67812	0.0126958			4.67562	-0.00534207
4.68562	0.0264496			4.68062	0.0423938			4.68395	0.0281632			4.68562	0.0403002			4.68208	0.0150874			4.68562	0.018768			4.68228	0.0202283			4.68395	0.0254437			4.6852	0.0238642			4.68542	0.00442564			4.68478	0.0119731			4.68228	-0.00593811
4.69228	0.0260249			4.68728	0.0426173			4.69062	0.0274181			4.69228	0.0406504			4.68875	0.0154451			4.69228	0.0192598			4.68895	0.0206009			4.69062	0.026159			4.69187	0.0232905			4.69208	0.00520051			4.69145	0.0121519			4.68895	-0.00718236
4.69895	0.0252724			4.69395	0.0429228			4.69728	0.026539			4.69895	0.0410601			4.69542	0.0157431			4.69895	0.0197738			4.69562	0.0203252			4.69728	0.0267401			4.69853	0.0228137			4.69875	0.00613928			4.69812	0.0125319			4.69562	-0.00852346
4.70562	0.0243336			4.70062	0.0430122			4.70395	0.0255629			4.70562	0.0416338			4.70208	0.0157431			4.70562	0.019975			4.70228	0.0194386			4.70395	0.0271648			4.7052	0.0228509			4.70542	0.00741333			4.70478	0.0131577			4.70228	-0.0096634
4.71228	0.023514			4.70728	0.0427589			4.71062	0.0249818			4.71228	0.0419691			4.70875	0.0155047			4.71228	0.0196844			4.70895	0.0187382			4.71062	0.0273734			4.71187	0.0230297			4.71208	0.00906736			4.71145	0.0141039			4.70895	-0.0104532
4.71895	0.0228509			4.71395	0.0421405			4.71728	0.0247359			4.71895	0.041835			4.71542	0.0152066			4.71895	0.0187531			4.71562	0.0181645			4.71728	0.0272989			4.71853	0.0230372			4.71875	0.0106469			4.71812	0.0150427			4.71562	-0.0109449
4.72562	0.0223964			4.72062	0.0410601			4.72395	0.0245869			4.72562	0.041537			4.72208	0.0150651			4.72562	0.017792			4.72228	0.0174716			4.72395	0.0270307			4.7252	0.0227317			4.72542	0.0115782			4.72478	0.0156239			4.72228	-0.0107214
4.73228	0.0217631			4.72728	0.0395477			4.73062	0.0240952			4.73228	0.04109			4.72875	0.0151023			4.73228	0.0173301			4.72895	0.016883			4.73062	0.026539			4.73187	0.0221282			4.73208	0.0114962			4.73145	0.0156164			4.72895	-0.00982732
4.73895	0.0215694			4.73395	0.0380799			4.73728	0.0234544			4.73895	0.0405014			4.73542	0.0152662			4.73895	0.0176355			4.73562	0.0167638			4.73728	0.0260398			4.73853	0.0213161			4.73875	0.0107139			4.73812	0.0158772			4.73562	-0.00873953
4.74562	0.0217035			4.74062	0.037469			4.74395	0.0225976			4.74562	0.0400096			4.74208	0.0149012			4.74562	0.0182837			4.74228	0.0169799			4.74395	0.0257567			4.7452	0.0205636			4.74542	0.00943244			4.74478	0.0160784			4.74228	-0.00782311
4.75228	0.0221282			4.74728	0.0377446			4.75062	0.0218526			4.75228	0.0397339			4.74875	0.0141636			4.75228	0.0189617			4.74895	0.0170693			4.75062	0.0253543			4.75187	0.0203326			4.75208	0.00788271			4.75145	0.0159591			4.74895	-0.00724941
4.75895	0.0226349			4.75395	0.0383258			4.75728	0.021629			4.75895	0.0398532			4.75542	0.0135303			4.75895	0.0198036			4.75562	0.0171438			4.75728	0.0249967			4.75853	0.0207946			4.75875	0.00657141			4.75812	0.0157282			4.75562	-0.0070259
4.76562	0.0230521			4.76062	0.0390708			4.76395	0.022009			4.76562	0.0403896			4.76208	0.0130162			4.76562	0.0209361			4.76228	0.0173971			4.76395	0.0247732			4.7652	0.0219047			4.76542	0.00576675			4.76478	0.0159591			4.76228	-0.00714511
4.77228	0.0235662			4.76728	0.0401065			4.77062	0.0226051			4.77228	0.0411123			4.76875	0.0124872			4.77228	0.0215843			4.76895	0.0174493			4.77062	0.024654			4.77187	0.023447			4.77208	0.00550598			4.77145	0.016734			4.76895	-0.00748038
4.77895	0.0238866			4.77395	0.0411496			4.77728	0.0231266			4.77895	0.0417605			4.77542	0.0118092			4.77895	0.0215322			4.77562	0.0171587			4.77728	0.0240877			4.77853	0.024803			4.77875	0.00567734			4.77812	0.0174567			4.77562	-0.00778586
4.78562	0.0239685			4.78062	0.0413358			4.78395	0.0238195			4.78562	0.0422671			4.78208	0.0113696			4.78562	0.021182			4.78228	0.0169799			4.78395	0.0228286			4.7852	0.0254586			4.78542	0.00587851			4.78478	0.0181496			4.78228	-0.00809878
4.79228	0.0242293			4.78728	0.0409633			4.79062	0.0247285			4.79228	0.0425354			4.78875	0.0114068			4.79228	0.0209212			4.78895	0.0170618			4.79062	0.0215322			4.79187	0.0254437			4.79208	0.00613183			4.79145	0.019148			4.78895	-0.00847876
4.79895	0.0249445			4.79395	0.0407919			4.79728	0.0256449			4.79895	0.042446			4.79542	0.0115335			4.79895	0.0203997			4.79562	0.0171363			4.79728	0.0206158			4.79853	0.02487			4.79875	0.00610948			4.79812	0.0200719			4.79562	-0.00854582
4.80562	0.0259206			4.80062	0.0408813			4.80395	0.0262856			4.80562	0.0420436			4.80208	0.0117049			4.80562	0.0196174			4.80228	0.0169873			4.80395	0.0201389			4.8052	0.0239164			4.80542	0.00592321			4.80478	0.0203624			4.80228	-0.00831485
4.81228	0.0266731			4.80728	0.0409186			4.81062	0.0271648			4.81228	0.0417456			4.80875	0.0116304			4.81228	0.0190958			4.80895	0.0171512			4.81062	0.019826			4.81187	0.0227317			4.81208	0.0057593			4.81145	0.0197664			4.80895	-0.00790507
4.81895	0.0269115			4.81395	0.0405684			4.81728	0.028342			4.81895	0.0415444			4.81542	0.0118762			4.81895	0.0187978			4.81562	0.01771			4.81728	0.0198185			4.81853	0.0218675			4.81875	0.00568479			4.81812	0.0187531			4.81562	-0.00801682
4.82562	0.0268966			4.82062	0.0404716			4.82395	0.0292286			4.82562	0.0410229			4.82208	0.012666			4.82562	0.018537			4.82228	0.0182986			4.82395	0.0203773			4.8252	0.0218302			4.82542	0.0057742			4.82478	0.0174642			4.82228	-0.0083819
4.83228	0.0264794			4.82728	0.0405312			4.83062	0.0292733			4.83228	0.04033			4.82875	0.0135079			4.83228	0.0181645			4.82895	0.0186488			4.83062	0.0212044			4.83187	0.0222996			4.83208	0.0057593			4.83145	0.0160635			4.82895	-0.00844151
4.83895	0.0255927			4.83395	0.0405684			4.83728	0.0284463			4.83895	0.0399053			4.83542	0.013724			4.83895	0.0178367			4.83562	0.0188425			4.83728	0.0218153			4.83853	0.0228882			4.83875	0.00607967			4.83812	0.0149235			4.83562	-0.00859797
4.84562	0.0244901			4.84062	0.0410378			4.84395	0.0275299			4.84562	0.0400096			4.84208	0.0133738			4.84562	0.0175387			4.84228	0.0187978			4.84395	0.0222251			4.8452	0.0232011			4.84542	0.00654906			4.84478	0.0141189			4.84228	-0.00931323
4.85228	0.0234321			4.84728	0.0418648			4.85062	0.0265986			4.85228	0.0402778			4.84875	0.0130236			4.85228	0.0173151			4.84895	0.018388			4.85062	0.0226945			4.85187	0.0236779			4.85208	0.00739843			4.85145	0.0137687			4.84895	-0.0104681
4.85895	0.0226796			4.85395	0.0429749			4.85728	0.0261739			4.85895	0.040628			4.85542	0.0127032			4.85895	0.017561			4.85562	0.0175759			4.85728	0.0234097			4.85853	0.0241995			4.85875	0.00846386			4.85812	0.0135079			4.85562	-0.0109822
4.86562	0.0225157			4.86062	0.0436381			4.86395	0.0266358			4.86562	0.0412911			4.86208	0.0123978			4.86562	0.01809			4.86228	0.0166744			4.86395	0.0240654			4.8652	0.0242069			4.86542	0.00974536			4.86478	0.0137612			4.86228	-0.0108033
4.87228	0.0230297			4.86728	0.043571			4.87062	0.0277907			4.87228	0.0419021			4.86875	0.0122339			4.87228	0.0186712			4.86895	0.0160038			4.87062	0.024721			4.87187	0.0238121			4.87208	0.0108778			4.87145	0.014402			4.86895	-0.0105798
4.87895	0.024043			4.87395	0.04296			4.87728	0.029102			4.87895	0.0419617			4.87542	0.0126213			4.87895	0.0191927			4.87562	0.0157878			4.87728	0.0250414			4.87853	0.0232458			4.87875	0.0114292			4.87812	0.0150353			4.87562	-0.0105947
4.88562	0.0250414			4.88062	0.0418052			4.88395	0.0297278			4.88562	0.041388			4.88208	0.0131428			4.88562	0.0196546			4.88228	0.0163391			4.88395	0.0249147			4.8852	0.0230074			4.88542	0.0118166			4.88478	0.0154227			4.88228	-0.0104085
4.89228	0.0257418			4.88728	0.0408739			4.89062	0.0299886			4.89228	0.0407249			4.88875	0.0134334			4.89228	0.0200868			4.88895	0.0170246			4.89062	0.0245124			4.89187	0.0227243			4.89208	0.0120103			4.89145	0.0154898			4.88895	-0.0100136
4.89895	0.026159			4.89395	0.0403598			4.89728	0.0295341			4.89895	0.0404343			4.89542	0.0132471			4.89895	0.0201091			4.89562	0.0175089			4.89728	0.0246242			4.89853	0.0223368			4.89875	0.0117198			4.89812	0.0158846			4.89562	-0.00981241
4.90562	0.0261739			4.90062	0.0403523			4.90395	0.0284687			4.90562	0.0402033			4.90208	0.0127032			4.90562	0.0199005			4.90228	0.0175983			4.90395	0.0254288			4.9052	0.0218526			4.90542	0.0107959			4.90478	0.0163093			4.90228	-0.00986457
4.91228	0.0257716			4.90728	0.0410303			4.91062	0.0271574			4.91228	0.0398606			4.90875	0.0120103			4.91228	0.0199527			4.90895	0.0177026			4.91062	0.0264198			4.91187	0.0212118			4.91208	0.00990182			4.91145	0.0166371			4.90895	-0.00996888
4.91895	0.0249073			4.91395	0.0419617			4.91728	0.0262856			4.91895	0.0394359			4.91542	0.0113025			4.91895	0.0202656			4.91562	0.0179335			4.91728	0.0272468			4.91853	0.0207722			4.91875	0.00936538			4.91812	0.0168607			4.91562	-0.00987202
4.92562	0.023745			4.92062	0.0429153			4.92395	0.0264719			4.92562	0.039205			4.92208	0.0109449			4.92562	0.0204295			4.92228	0.0179037			4.92395	0.0277534			4.9252	0.0206605			4.92542	0.00891089			4.92478	0.0170842			4.92228	-0.0100583
4.93228	0.0231415			4.92728	0.0430644			4.93062	0.0273511			4.93228	0.0392422			4.92875	0.0112951			4.93228	0.0197738			4.92895	0.017941			4.93062	0.0281036			4.93187	0.0208542			4.93208	0.00837445			4.93145	0.0174046			4.92895	-0.010334
4.93895	0.023365			4.93395	0.0426844			4.93728	0.0284538			4.93895	0.0391454			4.93542	0.0123307			4.93895	0.0185892			4.93562	0.0182539			4.93728	0.027895			4.93853	0.0213012			4.93875	0.00820309			4.93812	0.0177622			4.93562	-0.0104681
4.94562	0.0240281			4.94062	0.0419915			4.94395	0.0292957			4.94562	0.0390708			4.94208	0.0134706			4.94562	0.0173077			4.94228	0.018917			4.94395	0.0271052			4.9452	0.0218526			4.94542	0.00826269			4.94478	0.0183657			4.94228	-0.0103936
4.95228	0.0247061			4.94728	0.0411049			4.95062	0.0297204			4.95228	0.0390857			4.94875	0.0142455			4.95228	0.0160038			4.94895	0.019528			4.95062	0.0261143			4.95187	0.0226051			4.95208	0.00837445			4.95145	0.0191033			4.94895	-0.0104532
4.95895	0.0256076			4.95395	0.0405014			4.95728	0.0297949			4.95895	0.0396371			4.95542	0.0145286			4.95895	0.0150949			4.95562	0.0199601			4.95728	0.0253692			4.95853	0.023365			4.95875	0.00884384			4.95812	0.019975			4.95562	-0.01093
4.96562	0.0266284			4.96062	0.0399724			4.96395	0.0295341			4.96562	0.0406206			4.96208	0.0145659			4.96562	0.014551			4.96228	0.0201836			4.96395	0.0251159			4.9652	0.0239462			4.96542	0.00994653			4.96478	0.0209138			4.96228	-0.0112727
4.97228	0.026755			4.96728	0.0396594			4.97062	0.0291169			4.97228	0.0417903			4.96875	0.0142902			4.97228	0.0148267			4.96895	0.0201464			4.97062	0.0249222			4.97187	0.0241026			4.97208	0.011228			4.97145	0.0219345			4.96895	-0.0111982
4.97895	0.0256076			4.97395	0.0393614			4.97728	0.0286549			4.97895	0.0428632			4.97542	0.0137091			4.97895	0.0156537			4.97562	0.0198334			4.97728	0.0245646			4.97853	0.023976			4.97875	0.0120625			4.97812	0.0225231			4.97562	-0.0107884
4.98562	0.0240654			4.98062	0.0395849			4.98395	0.0286773			4.98562	0.0439435			4.98208	0.0132471			4.98562	0.0168458			4.98228	0.0197813			4.98395	0.024505			4.9852	0.0240058			4.98542	0.0127256			4.98478	0.0224262			4.98228	-0.0106096
4.99228	0.0230521			4.98728	0.0403151			4.99062	0.0292584			4.99228	0.0450909			4.98875	0.0131428			4.99228	0.0179261			4.98895	0.0198334			4.99062	0.02487			4.99187	0.024043			4.99208	0.0134408			4.99145	0.0217259			4.98895	-0.0105873
4.99895	0.0223219			4.99395	0.0410825			4.99728	0.0298321			4.99895	0.0458434			4.99542	0.0134632			4.99895	0.0183284			4.99562	0.0195429			4.99728	0.0258982			4.99853	0.0235811			4.99875	0.0139624			4.99812	0.0207722			4.99562	-0.0105724
5.00562	0.0216514			5.00062	0.0419021			5.00395	0.0299737			5.00562	0.0454709			5.00208	0.0138804			5.00562	0.0185445			5.00228	0.0189841			5.00395	0.0267252			5.0052	0.022985			5.00542	0.0143051			5.00478	0.0195876			5.00228	-0.0104085
5.01228	0.0212863			5.00728	0.0428185			5.01062	0.0294894			5.01228	0.0443608			5.00875	0.0142977			5.01228	0.0186488			5.00895	0.0184476			5.01062	0.0273213			5.01187	0.0228509			5.01208	0.0146553			5.01145	0.0184923			5.00895	-0.0102594
5.01895	0.0215322			5.01395	0.0437051			5.01728	0.0290275			5.01895	0.0432581			5.01542	0.0143945			5.01895	0.0189096			5.01562	0.0182465			5.01728	0.0278354			5.01853	0.0232086			5.01875	0.0152439			5.01812	0.0174716			5.01562	-0.0103489
5.02562	0.0223517			5.02062	0.0442713			5.02395	0.0283793			5.02562	0.0424236			5.02208	0.0140741			5.02562	0.0189617			5.02228	0.0176802			5.02395	0.0283346			5.0252	0.0234842			5.02542	0.0155643			5.02478	0.0167489			5.02228	-0.0107959
5.03228	0.0230819			5.02728	0.0442192			5.03062	0.0274479			5.03228	0.0417754			5.02875	0.013642			5.03228	0.0190213			5.02895	0.0167489			5.03062	0.0286698			5.03187	0.0237152			5.03208	0.015147			5.03145	0.0162795			5.02895	-0.0113696
5.03895	0.0234693			5.03395	0.0437722			5.03728	0.026837			5.03895	0.0411943			5.03542	0.0133142			5.03895	0.0192672			5.03562	0.0158176			5.03728	0.0283718			5.03853	0.0242442			5.03875	0.014253			5.03812	0.015974			5.03562	-0.0115633
5.04562	0.0233948			5.04062	0.0430867			5.04395	0.0269115			5.04562	0.04109			5.04208	0.0128448			5.04562	0.0195205			5.04228	0.0154004			5.04395	0.0280142			5.0452	0.0247806			5.04542	0.0130683			5.04478	0.0157431			5.04228	-0.0116006
5.05228	0.0230223			5.04728	0.0423118			5.05062	0.027597			5.05228	0.0410452			5.04875	0.0120178			5.05228	0.0195578			5.04895	0.0157729			5.05062	0.0279918			5.05187	0.0249371			5.05208	0.0118837			5.05145	0.0155643			5.04895	-0.0119358
5.05895	0.0227317			5.05395	0.0418201			5.05728	0.0283197			5.05895	0.0408441			5.05542	0.011608			5.05895	0.0192821			5.05562	0.0167191			5.05728	0.028044			5.05853	0.0245422			5.05875	0.0108108			5.05812	0.0158697			5.05562	-0.0126138
5.06562	0.0220761			5.06062	0.0414699			5.06395	0.0288412			5.06562	0.0404343			5.06208	0.0117198			5.06562	0.0190735			5.06228	0.0177026			5.06395	0.0276417			5.0652	0.0239462			5.06542	0.00994653			5.06478	0.0160784			5.06228	-0.0130758
5.07228	0.0213459			5.06728	0.0414178			5.07062	0.0292063			5.07228	0.0402257			5.06875	0.011906			5.07228	0.0188574			5.06895	0.0183582			5.07062	0.0269189			5.07187	0.023298			5.07208	0.00975281			5.07145	0.0161827			5.06895	-0.0134483
5.07895	0.0208318			5.07395	0.0413209			5.07728	0.0291914			5.07895	0.0406355			5.07542	0.0118315			5.07895	0.0185817			5.07562	0.0188053			5.07728	0.026308			5.07853	0.0229478			5.07875	0.0100583			5.07812	0.0163317			5.07562	-0.0139996
5.08562	0.0210106			5.08062	0.04109			5.08395	0.0289381			5.08562	0.0414699			5.08208	0.0120699			5.08562	0.0181571			5.08228	0.0189692			5.08395	0.0259355			5.0852	0.0227094			5.08542	0.0104755			5.08478	0.0168234			5.08228	-0.0147521
5.09228	0.021629			5.08728	0.0412986			5.09062	0.0287145			5.09228	0.0425354			5.08875	0.0130013			5.09228	0.0178292			5.08895	0.0188425			5.09062	0.0253841			5.09187	0.0223517			5.09208	0.0109002			5.09145	0.0169128			5.08895	-0.0151768
5.09895	0.0223443			5.09395	0.0418723			5.09728	0.0286251			5.09895	0.0434369			5.09542	0.0138804			5.09895	0.0175461			5.09562	0.0181794			5.09728	0.0250265			5.09853	0.0218451			5.09875	0.0115409			5.09812	0.0162348			5.09562	-0.014998
5.10562	0.0232384			5.10062	0.0426844			5.10395	0.0287741			5.10562	0.0440106			5.10208	0.0142828			5.10562	0.0170842			5.10228	0.0176728			5.10395	0.025019			5.1052	0.0213608			5.10542	0.0128224			5.10478	0.0154972			5.10228	-0.0141263
5.11228	0.023976			5.10728	0.0432357			5.11062	0.0293106			5.11228	0.0443682			5.10875	0.0145882			5.11228	0.0165552			5.10895	0.0177249			5.11062	0.0250414			5.11187	0.0213087			5.11208	0.0144616			5.11145	0.0152364			5.10895	-0.012666
5.11895	0.0244081			5.11395	0.0438541			5.11728	0.0301301			5.11895	0.0444055			5.11542	0.0152662			5.11895	0.0163242			5.11562	0.0182986			5.11728	0.0248328			5.11853	0.0214279			5.11875	0.0156537			5.11812	0.0151321			5.11562	-0.0112876
5.12562	0.0242963			5.12062	0.0449345			5.12395	0.0309721			5.12562	0.0441894			5.12208	0.0156537			5.12562	0.0166073			5.12228	0.0190586			5.12395	0.0246912			5.1252	0.021711			5.12542	0.0158772			5.12478	0.015229			5.12228	-0.0103712
5.13228	0.0237972			5.12728	0.0458285			5.13062	0.0312775			5.13228	0.04372			5.12875	0.0153035			5.13228	0.0173673			5.12895	0.0193641			5.13062	0.0248775			5.13187	0.0220761			5.13208	0.0151768			5.13145	0.0160635			5.12895	-0.00995398
5.13895	0.0230521			5.13395	0.0460297			5.13728	0.0312328			5.13895	0.0433996			5.13542	0.0145137			5.13895	0.0180975			5.13562	0.0195652			5.13728	0.0248998			5.13853	0.0224262			5.13875	0.0137836			5.13812	0.0178888			5.13562	-0.00989437
5.14562	0.0221059			5.14062	0.045456			5.14395	0.0309423			5.14562	0.0433177			5.14208	0.0140518			5.14562	0.0188798			5.14228	0.019744			5.14395	0.0247285			5.1452	0.0226125			5.14542	0.0122264			5.14478	0.0197813			5.14228	-0.0101328
5.15228	0.0213683			5.14728	0.0446141			5.15062	0.0304878			5.15228	0.0432953			5.14875	0.0139475			5.15228	0.0198036			5.14895	0.0196919			5.15062	0.0248328			5.15187	0.0224113			5.15208	0.0104606			5.15145	0.0208691			5.14895	-0.0106841
5.15895	0.0209734			5.15395	0.0438765			5.15728	0.0301376			5.15895	0.0433847			5.15542	0.0138357			5.15895	0.0205785			5.15562	0.0193715			5.15728	0.025481			5.15853	0.0222027			5.15875	0.009045			5.15812	0.0215173			5.15562	-0.011079
5.16562	0.0209585			5.16062	0.0430867			5.16395	0.0299215			5.16562	0.0436902			5.16208	0.0142306			5.16562	0.0208095			5.16228	0.0188872			5.16395	0.0263602			5.1652	0.0220835			5.16542	0.00828505			5.16478	0.0219792			5.16228	-0.011161
5.17228	0.0213534			5.16728	0.0421181			5.17062	0.0301152			5.17228	0.0441223			5.16875	0.0150502			5.17228	0.0203252			5.16895	0.0186637			5.17062	0.0268444			5.17187	0.0219643			5.17208	0.00835955			5.17145	0.0220612			5.16895	-0.0110492
5.17895	0.0218824			5.17395	0.0412837			5.17728	0.0305176			5.17895	0.0446886			5.17542	0.0160187			5.17895	0.0198185			5.17562	0.0182912			5.17728	0.0270307			5.17853	0.0213608			5.17875	0.00913441			5.17812	0.0210628			5.17562	-0.01055
5.18562	0.0225008			5.18062	0.0408739			5.18395	0.0310317			5.18562	0.0456795			5.18208	0.0164956			5.18562	0.0194386			5.18228	0.0173524			5.18395	0.0268891			5.1852	0.0205189			5.18542	0.0100359			5.18478	0.0197366			5.18228	-0.0100359
5.19228	0.0226721			5.18728	0.0413656			5.19062	0.0317246			5.19228	0.0470206			5.18875	0.0165328			5.19228	0.0189096			5.18895	0.0163391			5.19062	0.0266805			5.19187	0.0199899			5.19208	0.0105798			5.19145	0.019066			5.18895	-0.00968575
5.19895	0.0225604			5.19395	0.0422373			5.19728	0.032112			5.19895	0.047788			5.19542	0.0166669			5.19895	0.0186637			5.19562	0.0159517			5.19728	0.0263751			5.19853	0.0200346			5.19875	0.0105426			5.19812	0.0189841			5.19562	-0.00987947
5.20562	0.0223964			5.20062	0.0428259			5.20395	0.0319406			5.20562	0.0477657			5.20208	0.0164807			5.20562	0.0190139			5.20228	0.0164062			5.20395	0.02563			5.2052	0.0204295			5.20542	0.0102222			5.20478	0.0190511			5.20228	-0.010334
5.21228	0.0225082			5.20728	0.0432581			5.21062	0.0313893			5.21228	0.0474975			5.20875	0.0159889			5.21228	0.0198111			5.20895	0.0173971			5.21062	0.0245348			5.21187	0.0211075			5.21208	0.0096187			5.21145	0.0187233			5.20895	-0.0104755
5.21895	0.0228211			5.21395	0.0436679			5.21728	0.0310317			5.21895	0.0471249			5.21542	0.01546			5.21895	0.0204667			5.21562	0.0183135			5.21728	0.0235736			5.21853	0.0223741			5.21875	0.00864267			5.21812	0.0186116			5.21562	-0.0107884
5.22562	0.0229701			5.22062	0.0441596			5.22395	0.031054			5.22562	0.0459626			5.22208	0.0154674			5.22562	0.0208169			5.22228	0.0191405			5.22395	0.023216			5.2252	0.0241473			5.22542	0.00731647			5.22478	0.0187084			5.22228	-0.011526
5.23228	0.0230372			5.22728	0.0443459			5.23062	0.0308827			5.23228	0.043951			5.22875	0.0157952			5.23228	0.0211596			5.22895	0.0199378			5.23062	0.0228658			5.23187	0.0259876			5.23208	0.00669062			5.23145	0.0188276			5.22895	-0.0124946
5.23895	0.0228807			5.23395	0.0438914			5.23728	0.0306144			5.23895	0.0423417			5.23542	0.01546			5.23895	0.0212267			5.23562	0.0206903			5.23728	0.0220314			5.23853	0.0271127			5.23875	0.0069961			5.23812	0.0187606			5.23562	-0.0127554
5.24562	0.0228509			5.24062	0.0433475			5.24395	0.0305623			5.24562	0.0417009			5.24208	0.0145659			5.24562	0.0209957			5.24228	0.0215322			5.24395	0.0211075			5.2452	0.0273287			5.24542	0.00795722			5.24478	0.0184551			5.24228	-0.0121444
5.25228	0.0228733			5.24728	0.0428185			5.25062	0.0307038			5.25228	0.0416487			5.24875	0.0140369			5.25228	0.0203848			5.24895	0.0222698			5.25062	0.0211149			5.25187	0.0269264			5.25208	0.00913441			5.25145	0.0185072			5.24895	-0.0114813
5.25895	0.0226274			5.25395	0.0427291			5.25728	0.0307262			5.25895	0.041604			5.25542	0.0141039			5.25895	0.0196546			5.25562	0.0228211			5.25728	0.0218302			5.25853	0.0265092			5.25875	0.0104085			5.25812	0.0191629			5.25562	-0.0112355
5.26562	0.0222772			5.26062	0.0429526			5.26395	0.030674			5.26562	0.0417903			5.26208	0.0142232			5.26562	0.0189543			5.26228	0.0230968			5.26395	0.0224784			5.2652	0.0262335			5.26542	0.0117496			5.26478	0.0202581			5.26228	-0.0111833
5.27228	0.022307			5.26728	0.043191			5.27062	0.0308901			5.27228	0.0423417			5.26875	0.013873			5.27228	0.0182912			5.26895	0.0232458			5.27062	0.0227541			5.27187	0.0257045			5.27208	0.0123978			5.27145	0.0212789			5.26895	-0.0111535
5.27895	0.0232533			5.27395	0.0435337			5.27728	0.0312179			5.27895	0.0428036			5.27542	0.0137687			5.27895	0.0176504			5.27562	0.023298			5.27728	0.0229999			5.27853	0.0249594			5.27875	0.012286			5.27812	0.0219196			5.27562	-0.011161
5.28562	0.0243708			5.28062	0.0438616			5.28395	0.0313744			5.28562	0.0428706			5.28208	0.0141934			5.28562	0.0171065			5.28228	0.0227615			5.28395	0.0238493			5.2852	0.0245124			5.28542	0.0114217			5.28478	0.0222102			5.28228	-0.0115335
5.29228	0.0248179			5.28728	0.0441894			5.29062	0.0312179			5.29228	0.0426993			5.28875	0.0145212			5.29228	0.0170767			5.28895	0.0216663			5.29062	0.0247136			5.29187	0.0245571			5.29208	0.0102893			5.29145	0.0225529			5.28895	-0.0121593
5.29895	0.0249743			5.29395	0.0443012			5.29728	0.0312701			5.29895	0.0427887			5.29542	0.0144765			5.29895	0.0176206			5.29562	0.0207424			5.29728	0.025019			5.29853	0.0246018			5.29875	0.00920147			5.29812	0.022687			5.29562	-0.0130758
5.30562	0.02525			5.30062	0.0440851			5.30395	0.0315458			5.30562	0.0429973			5.30208	0.0146255			5.30562	0.0187159			5.30228	0.0203103			5.30395	0.0251681			5.3052	0.0242144			5.30542	0.00850856			5.30478	0.0224859			5.30228	-0.0139326
5.31228	0.0254884			5.30728	0.0437275			5.31062	0.0321418			5.31228	0.0429749			5.30875	0.0153631			5.31228	0.0200793			5.30895	0.0201613			5.31062	0.0256747			5.31187	0.0238344			5.31208	0.00849366			5.31145	0.0220314			5.30895	-0.0144467
5.31895	0.0250041			5.31395	0.0433326			5.31728	0.0329316			5.31895	0.042744			5.31542	0.0162497			5.31895	0.0214428			5.31562	0.0198483			5.31728	0.0267178			5.31853	0.0239164			5.31875	0.00884384			5.31812	0.0218377			5.31562	-0.0147447
5.32562	0.0241697			5.32062	0.0431091			5.32395	0.0337958			5.32562	0.0425726			5.32208	0.0165105			5.32562	0.0222325			5.32228	0.0193715			5.32395	0.027217			5.3252	0.0239387			5.32542	0.00950694			5.32478	0.0222921			5.32228	-0.0146031
5.33228	0.023745			5.32728	0.0428557			5.33062	0.0348762			5.33228	0.0425503			5.32875	0.0160858			5.33228	0.0221208			5.32895	0.0188574			5.33062	0.0270754			5.33187	0.0238568			5.33208	0.00995398			5.33145	0.0227094			5.32895	-0.0139773
5.33895	0.0238568			5.33395	0.0426248			5.33728	0.0357255			5.33895	0.0422969			5.33542	0.0151768			5.33895	0.0215769			5.33562	0.0184476			5.33728	0.0269189			5.33853	0.024043			5.33875	0.0104159			5.33812	0.0230521			5.33562	-0.0123903
5.34562	0.023894			5.34062	0.0426397			5.34395	0.0362173			5.34562	0.0420734			5.34208	0.01394			5.34562	0.0206083			5.34228	0.0188202			5.34395	0.0267252			5.3452	0.02487			5.34542	0.0108927			5.34478	0.0231564			5.34228	-0.0104383
5.35228	0.0237599			5.34728	0.0430644			5.35062	0.0362545			5.35228	0.0422746			5.34875	0.0124127			5.35228	0.0195578			5.34895	0.0199825			5.35062	0.0265241			5.35187	0.025779			5.35208	0.0113249			5.35145	0.0227764			5.34895	-0.00848621
5.35895	0.0237972			5.35395	0.0435486			5.35728	0.0361055			5.35895	0.042744			5.35542	0.0112206			5.35895	0.0184476			5.35562	0.021331			5.35728	0.0262856			5.35853	0.0262856			5.35875	0.0117496			5.35812	0.0218675			5.35562	-0.00682473
5.36562	0.0240058			5.36062	0.0438467			5.36395	0.0358522			5.36562	0.0430197			5.36208	0.0108331			5.36562	0.0178218			5.36228	0.0223219			5.36395	0.0262931			5.3652	0.0268593			5.36542	0.0121072			5.36478	0.0205263			5.36228	-0.0057742
5.37228	0.0241548			5.36728	0.0441745			5.37062	0.035353			5.37228	0.0431463			5.36875	0.0113025			5.37228	0.0177398			5.36895	0.0231043			5.37062	0.0265762			5.37187	0.0275671			5.37208	0.0127032			5.37145	0.0193119			5.36895	-0.00555068
5.37895	0.0241101			5.37395	0.0445768			5.37728	0.0343472			5.37895	0.0434816			5.37542	0.0124872			5.37895	0.0176877			5.37562	0.0238791			5.37728	0.0268891			5.37853	0.0280589			5.37875	0.0131279			5.37812	0.0183359			5.37562	-0.00604242
5.38562	0.0242814			5.38062	0.0451133			5.38395	0.033088			5.38562	0.0438839			5.38208	0.0138134			5.38562	0.0177547			5.38228	0.0241995			5.38395	0.0274405			5.3852	0.0279993			5.38542	0.0129417			5.38478	0.0180677			5.38228	-0.00659376
5.39228	0.0245348			5.38728	0.0451952			5.39062	0.0314936			5.39228	0.0441149			5.38875	0.0154302			5.39228	0.0178516			5.38895	0.0237599			5.39062	0.0282377			5.39187	0.0274777			5.39208	0.012368			5.39145	0.0188276			5.38895	-0.00676513
5.39895	0.0247508			5.39395	0.0454485			5.39728	0.0296608			5.39895	0.0445321			5.39542	0.0168011			5.39895	0.0181273			5.39562	0.0228882			5.39728	0.0289604			5.39853	0.0268519			5.39875	0.011839			5.39812	0.0201985			5.39562	-0.00680238
5.40562	0.0247434			5.40062	0.0459254			5.40395	0.0281557			5.40562	0.0454262			5.40208	0.0177473			5.40562	0.0183061			5.40228	0.022307			5.40395	0.0293851			5.4052	0.026308			5.40542	0.0116676			5.40478	0.0213981			5.40228	-0.00689179
5.41228	0.0246838			5.40728	0.0468567			5.41062	0.0273585			5.41228	0.0463575			5.40875	0.0178814			5.41228	0.0186414			5.40895	0.0220835			5.41062	0.0294745			5.41187	0.0261217			5.41208	0.0117272			5.41145	0.0222996			5.40895	-0.00712276
5.41895	0.024654			5.41395	0.0476837			5.41728	0.0275671			5.41895	0.0467598			5.41542	0.0175834			5.41895	0.0190213			5.41562	0.0223368			5.41728	0.0292212			5.41853	0.0263378			5.41875	0.0118017			5.41812	0.0227913			5.41562	-0.00736862
5.42562	0.0246689			5.42062	0.0478774			5.42395	0.0279248			5.42562	0.0470057			5.42208	0.0172481			5.42562	0.0191331			5.42228	0.0225082			5.42395	0.0284761			5.4252	0.0266954			5.42542	0.0121146			5.42478	0.0229031			5.42228	-0.00755489
5.43228	0.0248626			5.42728	0.0477955			5.43062	0.0284687			5.43228	0.0471324			5.42875	0.016965			5.43228	0.0188351			5.42895	0.0227094			5.43062	0.0272691			5.43187	0.0272244			5.43208	0.0124872			5.43145	0.0227839			5.42895	-0.00793487
5.43895	0.0251755			5.43395	0.0474527			5.43728	0.0295639			5.43895	0.0472814			5.43542	0.0167489			5.43895	0.0181645			5.43562	0.0228435			5.43728	0.0256598			5.43853	0.0277162			5.43875	0.0125542			5.43812	0.0226498			5.43562	-0.00806153
5.44562	0.0255778			5.44062	0.047259			5.44395	0.0309944			5.44562	0.047192			5.44208	0.0167191			5.44562	0.0175387			5.44228	0.0230372			5.44395	0.0239238			5.4452	0.0278279			5.44542	0.0119209			5.44478	0.02262			5.44228	-0.0076443
5.45228	0.0257343			5.44728	0.0469163			5.45062	0.032194			5.45228	0.0470579			5.44875	0.0172257			5.45228	0.0172704			5.44895	0.023067			5.45062	0.0224188			5.45187	0.0273436			5.45208	0.0111237			5.45145	0.0222623			5.44895	-0.00664592
5.45895	0.0253767			5.45395	0.0465363			5.45728	0.0326335			5.45895	0.0467375			5.45542	0.0178143			5.45895	0.017494			5.45562	0.0223517			5.45728	0.0218675			5.45853	0.0265688			5.45875	0.0106469			5.45812	0.0217631			5.45562	-0.00576675
5.46562	0.0248924			5.46062	0.0463501			5.46395	0.0329018			5.46562	0.0460967			5.46208	0.0184774			5.46562	0.0182241			5.46228	0.0213161			5.46395	0.0221357			5.4652	0.0260547			5.46542	0.0103936			5.46478	0.0213832			5.46228	-0.00535697
5.47228	0.0246763			5.46728	0.046514			5.47062	0.0334382			5.47228	0.0456199			5.46875	0.0187308			5.47228	0.0191927			5.46895	0.0203401			5.47062	0.0227913			5.47187	0.0260174			5.47208	0.0102073			5.47145	0.0211895			5.46895	-0.00520796
5.47895	0.0249073			5.47395	0.0465661			5.47728	0.0338405			5.47895	0.0454262			5.47542	0.0182688			5.47895	0.0207946			5.47562	0.0197664			5.47728	0.0234693			5.47853	0.0262186			5.47875	0.0102669			5.47812	0.0211373			5.47562	-0.0051856
5.48562	0.0252798			5.48062	0.0462979			5.48395	0.0341013			5.48562	0.0455379			5.48208	0.0171512			5.48562	0.022836			5.48228	0.0194311			5.48395	0.0248253			5.4852	0.0264049			5.48542	0.0110567			5.48478	0.0215545			5.48228	-0.00532717
5.49228	0.0256374			5.48728	0.0459179			5.49062	0.0339746			5.49228	0.0456795			5.48875	0.0160411			5.49228	0.0243858			5.48895	0.0195652			5.49062	0.0264049			5.49187	0.0267401			5.49208	0.0123531			5.49145	0.0226051			5.48895	-0.00555068
5.49895	0.0261068			5.49395	0.0459477			5.49728	0.0339299			5.49895	0.046216			5.49542	0.0157133			5.49895	0.0248998			5.49562	0.0198856			5.49728	0.0275746			5.49853	0.0269935			5.49875	0.0135973			5.49812	0.0238046			5.49562	-0.00561774
5.50562	0.0263005			5.50062	0.0462309			5.50395	0.0340268			5.50562	0.0466853			5.50208	0.0154972			5.50562	0.0244528			5.50228	0.0204593			5.50395	0.0281855			5.5052	0.0270605			5.50542	0.0144318			5.50478	0.0243634			5.50228	-0.0057295
5.51228	0.0261515			5.50728	0.0463426			5.51062	0.0339225			5.51228	0.0468567			5.50875	0.0155717			5.51228	0.0237599			5.50895	0.0207722			5.51062	0.0284389			5.51187	0.0268444			5.51208	0.014618			5.51145	0.0241026			5.50895	-0.0057444
5.51895	0.0257343			5.51395	0.0464916			5.51728	0.0335798			5.51895	0.0466332			5.51542	0.0161156			5.51895	0.0225455			5.51562	0.0210404			5.51728	0.0286475			5.51853	0.0266209			5.51875	0.0144839			5.51812	0.0234619			5.51562	-0.00564009
5.52562	0.0252649			5.52062	0.0469163			5.52395	0.0330433			5.52562	0.0465885			5.52208	0.0172928			5.52562	0.0206903			5.52228	0.0209659			5.52395	0.0281259			5.5252	0.0267997			5.52542	0.0139624			5.52478	0.0227392			5.52228	-0.00552833
5.53228	0.0246242			5.52728	0.0474826			5.53062	0.0330955			5.53228	0.0468865			5.52875	0.0183806			5.53228	0.0190064			5.52895	0.0206307			5.53062	0.0273585			5.53187	0.0270158			5.53208	0.0130981			5.53145	0.0220537			5.52895	-0.00553578
5.53895	0.0237823			5.53395	0.0473633			5.53728	0.0335872			5.53895	0.0473484			5.53542	0.0184327			5.53895	0.018239			5.53562	0.0203699			5.53728	0.0265613			5.53853	0.0272468			5.53875	0.0120252			5.53812	0.0217482			5.53562	-0.00562519
5.54562	0.0229403			5.54062	0.0467598			5.54395	0.0340268			5.54562	0.0481606			5.54208	0.0179559			5.54562	0.0182912			5.54228	0.0198036			5.54395	0.0259653			5.5452	0.0275001			5.54542	0.0111684			5.54478	0.0219047			5.54228	-0.00521541
5.55228	0.0221282			5.54728	0.0464544			5.55062	0.0342727			5.55228	0.0491068			5.54875	0.017032			5.55228	0.0183135			5.54895	0.0193715			5.55062	0.0256822			5.55187	0.0273883			5.55208	0.0108853			5.55145	0.0223666			5.54895	-0.00473112
5.55895	0.0212938			5.55395	0.0467673			5.55728	0.0343621			5.55895	0.0499114			5.55542	0.016585			5.55895	0.0182316			5.55562	0.0191778			5.55728	0.0260547			5.55853	0.0266954			5.55875	0.0109971			5.55812	0.0227317			5.55562	-0.00459701
5.56562	0.0209808			5.56062	0.0468343			5.56395	0.0343248			5.56562	0.0499561			5.56208	0.0166073			5.56562	0.0184327			5.56228	0.0197589			5.56395	0.0271425			5.5652	0.025183			5.56542	0.0112727			5.56478	0.0225678			5.56228	-0.00454485
5.57228	0.0215173			5.56728	0.0463873			5.57062	0.0340119			5.57228	0.0495166			5.56875	0.0168905			5.57228	0.0186041			5.56895	0.0205562			5.57062	0.0283718			5.57187	0.0236779			5.57208	0.0115857			5.57145	0.0220686			5.56895	-0.00442564
5.57895	0.0226498			5.57395	0.0464022			5.57728	0.0334308			5.57895	0.0488162			5.57542	0.0173897			5.57895	0.018388			5.57562	0.0210553			5.57728	0.0291467			5.57853	0.0224262			5.57875	0.0120178			5.57812	0.0213012			5.57562	-0.00380725
5.58562	0.023894			5.58062	0.0473186			5.58395	0.0327006			5.58562	0.0480786			5.58208	0.0177994			5.58562	0.0179186			5.58228	0.0212118			5.58395	0.0292882			5.5852	0.0214428			5.58542	0.0124276			5.58478	0.020504			5.58228	-0.00339001
5.59228	0.0251085			5.58728	0.0484064			5.59062	0.0322387			5.59228	0.0472814			5.58875	0.0182465			5.59228	0.0178441			5.58895	0.0208914			5.59062	0.029102			5.59187	0.0211224			5.59208	0.0127777			5.59145	0.0198558			5.58895	-0.00324845
5.59895	0.0264794			5.59395	0.0488684			5.59728	0.0323206			5.59895	0.0466704			5.59542	0.0183135			5.59895	0.0179484			5.59562	0.0201762			5.59728	0.0282377			5.59853	0.0218749			5.59875	0.0130758			5.59812	0.0195205			5.59562	-0.00365078
5.60562	0.0273436			5.60062	0.0489578			5.60395	0.0328198			5.60562	0.0460818			5.60208	0.0178367			5.60562	0.0179559			5.60228	0.019215			5.60395	0.0268444			5.6052	0.0233501			5.60542	0.013344			5.60478	0.0198185			5.60228	-0.00447035
5.61228	0.0277534			5.60728	0.0493973			5.61062	0.0330955			5.61228	0.0456274			5.60875	0.0172555			5.61228	0.0182539			5.60895	0.0186265			5.61062	0.0251159			5.61187	0.024423			5.61208	0.0134185			5.61145	0.0204593			5.60895	-0.005126
5.61895	0.0278652			5.61395	0.049822			5.61728	0.0332519			5.61895	0.0452548			5.61542	0.0167489			5.61895	0.019066			5.61562	0.0185668			5.61728	0.024043			5.61853	0.0251606			5.61875	0.0131726			5.61812	0.0209883			5.61562	-0.00557303
5.62562	0.0276864			5.62062	0.0498295			5.62395	0.0337735			5.62562	0.045076			5.62208	0.0165924			5.62562	0.0196919			5.62228	0.0192076			5.62395	0.0238791			5.6252	0.025399			5.62542	0.0128895			5.62478	0.0213832			5.62228	-0.00575185
5.63228	0.0270754			5.62728	0.0494868			5.63062	0.0343695			5.63228	0.0449866			5.62875	0.0164509			5.63228	0.0198781			5.62895	0.0204891			5.63062	0.0241846			5.63187	0.0249818			5.63208	0.0125244			5.63145	0.0219643			5.62895	-0.0057295
5.63895	0.02601			5.63395	0.0492781			5.63728	0.0345483			5.63895	0.0448972			5.63542	0.0163615			5.63895	0.0201166			5.63562	0.0219569			5.63728	0.0248253			5.63853	0.0236407			5.63875	0.0123978			5.63812	0.0229776			5.63562	-0.00523031
5.64562	0.0252947			5.64062	0.0496656			5.64395	0.0343695			5.64562	0.0454262			5.64208	0.0163689			5.64562	0.0206083			5.64228	0.0229552			5.64395	0.0255108			5.6452	0.0226274			5.64542	0.0126511			5.64478	0.0241026			5.64228	-0.00423938
5.65228	0.024952			5.64728	0.0501499			5.65062	0.0341982			5.65228	0.0462011			5.64875	0.0163689			5.65228	0.0209436			5.64895	0.023067			5.65062	0.0264049			5.65187	0.0226796			5.65208	0.0131577			5.65145	0.0248924			5.64895	-0.00335276
5.65895	0.0250861			5.65395	0.0504777			5.65728	0.0343695			5.65895	0.0469759			5.65542	0.0161901			5.65895	0.0210032			5.65562	0.0228658			5.65728	0.0270978			5.65853	0.0230968			5.65875	0.0134856			5.65812	0.0253916			5.65562	-0.00267476
5.66562	0.02563			5.66062	0.0503063			5.66395	0.0346452			5.66562	0.0478327			5.66208	0.0156015			5.66562	0.0211			5.66228	0.0226721			5.66395	0.0277311			5.6652	0.0239611			5.66542	0.0133291			5.66478	0.0256673			5.66228	-0.00166893
5.67228	0.026539			5.66728	0.0497326			5.67062	0.0348613			5.67228	0.048995			5.66875	0.01508			5.67228	0.0211149			5.66895	0.0225827			5.67062	0.0282973			5.67187	0.0253767			5.67208	0.012964			5.67145	0.0256673			5.66895	-0.000238419
5.67895	0.0274703			5.67395	0.0488535			5.67728	0.0349656			5.67895	0.050053			5.67542	0.0147223			5.67895	0.0207722			5.67562	0.0227764			5.67728	0.0288561			5.67853	0.0273436			5.67875	0.0123978			5.67812	0.0251383			5.67562	0.00127405
5.68562	0.0279099			5.68062	0.0477955			5.68395	0.0353828			5.68562	0.050202			5.68208	0.0147596			5.68562	0.0201166			5.68228	0.0231788			5.68395	0.0294745			5.6852	0.0287369			5.68542	0.0118986			5.68478	0.0241697			5.68228	0.00210851
5.69228	0.0279471			5.68728	0.0469163			5.69062	0.0365153			5.69228	0.0497699			5.68875	0.0148639			5.69228	0.0196695			5.68895	0.0237972			5.69062	0.0303909			5.69187	0.0290498			5.69208	0.011906			5.69145	0.0234395			5.68895	0.00263005
5.69895	0.0276119			5.69395	0.0463054			5.69728	0.0375658			5.69895	0.0493526			5.69542	0.015296			5.69895	0.0195354			5.69562	0.0243783			5.69728	0.0311732			5.69853	0.0288412			5.69875	0.0124052			5.69812	0.0234246			5.69562	0.00312179
5.70562	0.0271052			5.70062	0.0463203			5.70395	0.0379831			5.70562	0.0488684			5.70208	0.0158623			5.70562	0.0200644			5.70228	0.0248924			5.70395	0.0313818			5.7052	0.0280961			5.70542	0.0129268			5.70478	0.024125			5.70228	0.00352412
5.71228	0.0265464			5.70728	0.0468269			5.71062	0.0380948			5.71228	0.0483692			5.70875	0.0162944			5.71228	0.0207499			5.70895	0.0252649			5.71062	0.0312477			5.71187	0.0271201			5.71208	0.013046			5.71145	0.0249818			5.70895	0.00359863
5.71895	0.0259504			5.71395	0.0476539			5.71728	0.0385791			5.71895	0.047937			5.71542	0.0163913			5.71895	0.0212938			5.71562	0.0251532			5.71728	0.0309125			5.71853	0.0261515			5.71875	0.0128597			5.71812	0.0257716			5.71562	0.00348687
5.72562	0.0253841			5.72062	0.0485331			5.72395	0.0386909			5.72562	0.0476986			5.72208	0.0159591			5.72562	0.0216886			5.72228	0.0246763			5.72395	0.0306666			5.7252	0.0258982			5.72542	0.0121444			5.72478	0.0262782			5.72228	0.00392646
5.73228	0.024572			5.72728	0.0491366			5.73062	0.0380799			5.73228	0.0475124			5.72875	0.0152513			5.73228	0.021562			5.72895	0.0243038			5.73062	0.029847			5.73187	0.026159			5.73208	0.0107884			5.73145	0.0266656			5.72895	0.005126
5.73895	0.0235438			5.73395	0.0497177			5.73728	0.0371337			5.73895	0.0475571			5.73542	0.014402			5.73895	0.0208989			5.73562	0.0243261			5.73728	0.0289306			5.73853	0.0265986			5.73875	0.0096038			5.73812	0.0268072			5.73562	0.00619888
5.74562	0.022389			5.74062	0.0499561			5.74395	0.0367612			5.74562	0.0479966			5.74208	0.0139177			5.74562	0.0199527			5.74228	0.024423			5.74395	0.0281334			5.7452	0.0269637			5.74542	0.00930578			5.74478	0.0267029			5.74228	0.00655651
5.75228	0.0213459			5.74728	0.0498667			5.75062	0.0366569			5.75228	0.0484735			5.74875	0.0139177			5.75228	0.0198931			5.74895	0.0245497			5.75062	0.0274628			5.75187	0.027366			5.75208	0.0103712			5.75145	0.0265017			5.74895	0.00657886
5.75895	0.0207797			5.75395	0.0496283			5.75728	0.0367388			5.75895	0.0487641			5.75542	0.0141338			5.75895	0.0205114			5.75562	0.0245571			5.75728	0.0270903			5.75853	0.0276715			5.75875	0.0120178			5.75812	0.0262931			5.75562	0.00709295
5.76562	0.0208914			5.76062	0.049293			5.76395	0.0372976			5.76562	0.0494868			5.76208	0.0143051			5.76562	0.0209138			5.76228	0.0247806			5.76395	0.0270084			5.7652	0.0273064			5.76542	0.0137687			5.76478	0.0266954			5.76228	0.00820309
5.77228	0.0218302			5.76728	0.0490397			5.77062	0.0384748			5.77228	0.0505969			5.76875	0.0145733			5.77228	0.0211671			5.76895	0.0247583			5.77062	0.0277832			5.77187	0.0267923			5.77208	0.0150502			5.77145	0.027597			5.76895	0.00929087
5.77895	0.0236332			5.77395	0.0488833			5.77728	0.0401363			5.77895	0.0513569			5.77542	0.0151917			5.77895	0.0216216			5.77562	0.0247732			5.77728	0.0290126			5.77853	0.0263974			5.77875	0.0155941			5.77812	0.0287369			5.77562	0.0104457
5.78562	0.0256673			5.78062	0.0490323			5.78395	0.0413433			5.78562	0.0513196			5.78208	0.0157878			5.78562	0.0221953			5.78228	0.0250936			5.78395	0.0305399			5.7852	0.0265539			5.78542	0.0154451			5.78478	0.0295267			5.78228	0.0118986
5.79228	0.0272393			5.78728	0.049293			5.79062	0.042215			5.79228	0.0507385			5.78875	0.0159815			5.79228	0.02224			5.78895	0.0252798			5.79062	0.0320822			5.79187	0.0266209			5.79208	0.0146851			5.79145	0.0296533			5.78895	0.0136942
5.79895	0.0281185			5.79395	0.0492856			5.79728	0.042513			5.79895	0.0503212			5.79542	0.0160858			5.79895	0.0221953			5.79562	0.02525			5.79728	0.0333115			5.79853	0.0264123			5.79875	0.0136495			5.79812	0.029631			5.79562	0.0156164
5.80562	0.028573			5.80062	0.049077			5.80395	0.0423715			5.80562	0.0500903			5.80208	0.0164583			5.80562	0.0228062			5.80228	0.0248253			5.80395	0.0338033			5.8052	0.0263005			5.80542	0.0128299			5.80478	0.0294298			5.80228	0.0175312
5.81228	0.0286922			5.80728	0.049144			5.81062	0.0418797			5.81228	0.050053			5.80875	0.0168607			5.81228	0.0237972			5.80895	0.0249743			5.81062	0.033468			5.81187	0.0264049			5.81208	0.0125468			5.81145	0.0290424			5.80895	0.0192374
5.81895	0.0279322			5.81395	0.0493899			5.81728	0.0413731			5.81895	0.0507757			5.81542	0.0166818			5.81895	0.0248775			5.81562	0.0255182			5.81728	0.032872			5.81853	0.0268966			5.81875	0.0127852			5.81812	0.0285506			5.81562	0.0208095
5.82562	0.0268966			5.82062	0.0496283			5.82395	0.0418052			5.82562	0.0519678			5.82208	0.016287			5.82562	0.0258759			5.82228	0.0259206			5.82395	0.0322163			5.8252	0.0273585			5.82542	0.0131801			5.82478	0.0284761			5.82228	0.02262
5.83228	0.0261962			5.82728	0.0501946			5.83062	0.043124			5.83228	0.0535548			5.82875	0.0161231			5.83228	0.0267327			5.82895	0.0262856			5.83062	0.0315905			5.83187	0.0277087			5.83208	0.0136271			5.83145	0.0290722			5.82895	0.024572
5.83895	0.0261366			5.83395	0.0512302			5.83728	0.0448152			5.83895	0.0550747			5.83542	0.016138			5.83895	0.0269562			5.83562	0.0270233			5.83728	0.0309944			5.83853	0.0277087			5.83875	0.0138581			5.83812	0.0295863			5.83562	0.02639
5.84562	0.0260845			5.84062	0.0524744			5.84395	0.0460148			5.84562	0.0563264			5.84208	0.0162348			5.84562	0.0263751			5.84228	0.0279546			5.84395	0.0310019			5.8452	0.027515			5.84542	0.0137016			5.84478	0.0296831			5.84228	0.0276342
5.85228	0.0258386			5.84728	0.0531524			5.85062	0.0464469			5.85228	0.057064			5.84875	0.0165179			5.85228	0.0253916			5.84895	0.0280961			5.85062	0.0314265			5.85187	0.0270829			5.85208	0.0129864			5.85145	0.0294223			5.84895	0.0289083
5.85895	0.0259578			5.85395	0.0532717			5.85728	0.046581			5.85895	0.0569895			5.85542	0.017181			5.85895	0.0241622			5.85562	0.0272095			5.85728	0.031814			5.85853	0.0261441			5.85875	0.0121519			5.85812	0.0291616			5.85562	0.0305921
5.86562	0.0260994			5.86062	0.0531301			5.86395	0.0464395			5.86562	0.0569373			5.86208	0.0178292			5.86562	0.0230446			5.86228	0.0263005			5.86395	0.0323281			5.8652	0.0249445			5.86542	0.0115111			5.86478	0.0288486			5.86228	0.0325516
5.87228	0.0261888			5.86728	0.0526533			5.87062	0.046052			5.87228	0.0573769			5.86875	0.0182986			5.87228	0.022307			5.86895	0.02601			5.87062	0.0332445			5.87187	0.0238642			5.87208	0.011228			5.87145	0.0286847			5.86895	0.0346825
5.87895	0.0259951			5.87395	0.0518709			5.87728	0.0455528			5.87895	0.0579804			5.87542	0.0187233			5.87895	0.0223666			5.87562	0.0261664			5.87728	0.0348687			5.87853	0.0237003			5.87875	0.0111535			5.87812	0.0289977			5.87562	0.0368506
5.88562	0.0257939			5.88062	0.0509769			5.88395	0.0455156			5.88562	0.0583827			5.88208	0.0191778			5.88562	0.022985			5.88228	0.0265837			5.88395	0.0365153			5.8852	0.0240952			5.88542	0.0113249			5.88478	0.0300482			5.88228	0.0389367
5.89228	0.0256151			5.88728	0.0500605			5.89062	0.046216			5.89228	0.0585616			5.88875	0.0195652			5.89228	0.0240132			5.88895	0.0273883			5.89062	0.0381768			5.89187	0.0250041			5.89208	0.0119135			5.89145	0.031516			5.88895	0.0405759
5.89895	0.0251606			5.89395	0.0492334			5.89728	0.0466928			5.89895	0.0589117			5.89542	0.0195876			5.89895	0.025332			5.89562	0.0284612			5.89728	0.0395849			5.89853	0.0259057			5.89875	0.0128895			5.89812	0.0330806			5.89562	0.0415146
5.90562	0.0249669			5.90062	0.0485927			5.90395	0.0467151			5.90562	0.0592023			5.90208	0.0191405			5.90562	0.0263155			5.90228	0.0292957			5.90395	0.0403598			5.9052	0.0264868			5.90542	0.0139847			5.90478	0.0347793			5.90228	0.0421852
5.91228	0.0251308			5.90728	0.0485331			5.91062	0.0466183			5.91228	0.0591129			5.90875	0.018239			5.91228	0.0268668			5.90895	0.0295714			5.91062	0.0404343			5.91187	0.0270605			5.91208	0.0147447			5.91145	0.0367984			5.90895	0.0428706
5.91895	0.0255704			5.91395	0.0489578			5.91728	0.0469759			5.91895	0.0587478			5.91542	0.0172853			5.91895	0.0268742			5.91562	0.0295863			5.91728	0.0401139			5.91853	0.0274181			5.91875	0.0151917			5.91812	0.0390112			5.91562	0.0439435
5.92562	0.025928			5.92062	0.049606			5.92395	0.0480562			5.92562	0.0588596			5.92208	0.0164658			5.92562	0.0269413			5.92228	0.0298023			5.92395	0.0400096			5.9252	0.0278875			5.92542	0.0149608			5.92478	0.0408888			5.92228	0.0455379
5.93228	0.0260994			5.92728	0.0507087			5.93062	0.0492111			5.93228	0.0597611			5.92875	0.0159144			5.93228	0.0266284			5.92895	0.030309			5.93062	0.0399649			5.93187	0.0279471			5.93208	0.0144616			5.93145	0.0422224			5.92895	0.0475273
5.93895	0.026606			5.93395	0.0521615			5.93728	0.0507161			5.93895	0.0610203			5.93542	0.0156984			5.93895	0.0259355			5.93562	0.031352			5.93728	0.0400096			5.93853	0.0278056			5.93875	0.0137985			5.93812	0.0430718			5.93562	0.050053
5.94562	0.0272915			5.94062	0.0538677			5.94395	0.052467			5.94562	0.0619516			5.94208	0.0159293			5.94562	0.0254065			5.94228	0.0323206			5.94395	0.0402853			5.9452	0.0281408			5.94542	0.0131577			5.94478	0.0435263			5.94228	0.0527874
5.95228	0.0280142			5.94728	0.0549108			5.95062	0.0542998			5.95228	0.0622272			5.94875	0.0168011			5.95228	0.0253394			5.94895	0.0329539			5.95062	0.0410751			5.95187	0.0286922			5.95208	0.0124201			5.95145	0.0436082			5.94895	0.0556409
5.95895	0.0285208			5.95395	0.0552163			5.95728	0.056088			5.95895	0.0625476			5.95542	0.0175387			5.95895	0.0257269			5.95562	0.0333861			5.95728	0.0423267			5.95853	0.0289679			5.95875	0.0120103			5.95812	0.0435859			5.95562	0.0583008
5.96562	0.0290051			5.96062	0.0552088			5.96395	0.0573918			5.96562	0.0629053			5.96208	0.0178963			5.96562	0.0259355			5.96228	0.033848			5.96395	0.0433624			5.9652	0.0281036			5.96542	0.0125095			5.96478	0.0439137			5.96228	0.0606477
5.97228	0.0295192			5.96728	0.0551939			5.97062	0.0586137			5.97228	0.0632778			5.96875	0.0177845			5.97228	0.0263527			5.96895	0.0345334			5.97062	0.0439137			5.97187	0.0269264			5.97208	0.0135079			5.97145	0.0448897			5.96895	0.0628084
5.97895	0.029847			5.97395	0.0552386			5.97728	0.0596493			5.97895	0.0636801			5.97542	0.0178218			5.97895	0.0269711			5.97562	0.0348687			5.97728	0.044249			5.97853	0.0265241			5.97875	0.0140592			5.97812	0.0462383			5.97562	0.064902
5.98562	0.0298992			5.98062	0.0552386			5.98395	0.0602752			5.98562	0.0644475			5.98208	0.0180751			5.98562	0.0275001			5.98228	0.0351891			5.98395	0.0447258			5.9852	0.0266209			5.98542	0.0141338			5.98478	0.04749			5.98228	0.0672638
5.99228	0.0295714			5.98728	0.0555292			5.99062	0.0605285			5.99228	0.0659004			5.98875	0.0179633			5.99228	0.0277534			5.98895	0.0361949			5.99062	0.0452101			5.99187	0.0269115			5.99208	0.014402			5.99145	0.0483468			5.98895	0.0702813
5.99895	0.0289306			5.99395	0.0562742			5.99728	0.0602528			5.99895	0.0672936			5.99542	0.0178516			5.99895	0.0275895			5.99562	0.0376776			5.99728	0.0454262			5.99853	0.0271723			5.99875	0.0151098			5.99812	0.0490546			5.99562	0.0736043
6.00562	0.0281632			6.00062	0.0569969			6.00395	0.0600219			6.00562	0.068374			6.00208	0.0178963			6.00562	0.0274032			6.00228	0.039041			6.00395	0.0458211			6.0052	0.0281259			6.00542	0.0157803			6.00478	0.0497997			6.00228	0.0770986
6.01228	0.0277013			6.00728	0.057444			6.01062	0.0602156			6.01228	0.0694394			6.00875	0.0181049			6.01228	0.027515			6.00895	0.0396967			6.01062	0.0469536			6.01187	0.0294521			6.01208	0.0162199			6.01145	0.0509471			6.00895	0.0806302
6.01895	0.0277683			6.01395	0.0577122			6.01728	0.0611022			6.01895	0.070557			6.01542	0.0181869			6.01895	0.0281334			6.01562	0.0400692			6.01728	0.0488162			6.01853	0.0307187			6.01875	0.0170171			6.01812	0.0521913			6.01562	0.0843927
6.02562	0.0282004			6.02062	0.0576749			6.02395	0.0623167			6.02562	0.0712574			6.02208	0.0182241			6.02562	0.0289679			6.02228	0.0405684			6.02395	0.0508279			6.0252	0.0318736			6.02542	0.0180304			6.02478	0.0534132			6.02228	0.088051
6.03228	0.0289381			6.02728	0.0575408			6.03062	0.0633448			6.03228	0.0714213			6.02875	0.018701			6.03228	0.0293851			6.02895	0.0406131			6.03062	0.0522733			6.03187	0.0327453			6.03208	0.0186339			6.03145	0.0546649			6.02895	0.0908077
6.03895	0.0296682			6.03395	0.057213			6.03728	0.064522			6.03895	0.0718683			6.03542	0.0191778			6.03895	0.0295863			6.03562	0.0401363			6.03728	0.0528991			6.03853	0.0334084			6.03875	0.0183582			6.03812	0.0559092			6.03562	0.0928268
6.04562	0.0302196			6.04062	0.0571683			6.04395	0.0657663			6.04562	0.0727996			6.04208	0.0192001			6.04562	0.0298321			6.04228	0.0396147			6.04395	0.053145			6.0452	0.0332817			6.04542	0.0177026			6.04478	0.0568032			6.04228	0.0946522
6.05228	0.0303462			6.04728	0.0572875			6.05062	0.0668168			6.05228	0.0737011			6.04875	0.0189915			6.05228	0.030078			6.04895	0.0395104			6.05062	0.0534579			6.05187	0.0325367			6.05208	0.0174046			6.05145	0.0568628			6.04895	0.0971183
6.05895	0.0301898			6.05395	0.0573993			6.05728	0.0670925			6.05895	0.0744089			6.05542	0.0188574			6.05895	0.0301078			6.05562	0.0398159			6.05728	0.0537112			6.05853	0.0316501			6.05875	0.0173151			6.05812	0.0567958			6.05562	0.100359
6.06562	0.0299439			6.06062	0.0576451			6.06395	0.0671521			6.06562	0.0754669			6.06208	0.0188202			6.06562	0.0302568			6.06228	0.0399947			6.06395	0.0538006			6.0652	0.0311509			6.06542	0.0174046			6.06478	0.0572652			6.06228	0.10401
6.07228	0.0295192			6.06728	0.0577345			6.07062	0.0673905			6.07228	0.0768155			6.06875	0.0186786			6.07228	0.0307858			6.06895	0.0403076			6.07062	0.0539497			6.07187	0.0310615			6.07208	0.0177622			6.07145	0.0583604			6.06895	0.108138
6.07895	0.0292957			6.07395	0.0581667			6.07728	0.0677705			6.07895	0.0781119			6.07542	0.0187233			6.07895	0.0312403			6.07562	0.0409186			6.07728	0.0545606			6.07853	0.0308901			6.07875	0.01847			6.07812	0.0597537			6.07562	0.112586
6.08562	0.0295267			6.08062	0.0587106			6.08395	0.0682771			6.08562	0.0793189			6.08208	0.0189617			6.08562	0.0315979			6.08228	0.0419095			6.08395	0.0555664			6.0852	0.0312328			6.08542	0.0194386			6.08478	0.0615492			6.08228	0.117354
6.09228	0.0297949			6.08728	0.0595301			6.09062	0.0687465			6.09228	0.080578			6.08875	0.018999			6.09228	0.0317544			6.08895	0.0434294			6.09062	0.0561625			6.09187	0.0323802			6.09208	0.0203475			6.09145	0.0640601			6.08895	0.121832
6.09895	0.0295565			6.09395	0.059925			6.09728	0.0696704			6.09895	0.0819564			6.09542	0.0182986			6.09895	0.0315756			6.09562	0.0451356			6.09728	0.0563934			6.09853	0.0336319			6.09875	0.0213161			6.09812	0.067018			6.09562	0.12596
6.10562	0.0288635			6.10062	0.0599623			6.10395	0.0709072			6.10562	0.0834912			6.10208	0.0174418			6.10562	0.030674			6.10228	0.046961			6.10395	0.0567958			6.1052	0.0339672			6.10542	0.0221208			6.10478	0.0702068			6.10228	0.12999
6.11228	0.0280291			6.10728	0.0604093			6.11062	0.0723451			6.11228	0.0854358			6.10875	0.0169277			6.11228	0.0294596			6.10895	0.0487119			6.11062	0.0580028			6.11187	0.0334904			6.11208	0.022836			6.11145	0.0733435			6.10895	0.1342
6.11895	0.0274107			6.11395	0.0612363			6.11728	0.0736862			6.11895	0.0875741			6.11542	0.0169873			6.11895	0.028953			6.11562	0.0502542			6.11728	0.0598654			6.11853	0.0331327			6.11875	0.0234172			6.11812	0.0761822			6.11562	0.138685
6.12562	0.0264272			6.12062	0.0619963			6.12395	0.0749975			6.12562	0.0895485			6.12208	0.01771			6.12562	0.029251			6.12228	0.0511184			6.12395	0.0619441			6.1252	0.0330731			6.12542	0.024043			6.12478	0.0786036			6.12228	0.143498
6.13228	0.0255629			6.12728	0.0622123			6.13062	0.0767484			6.13228	0.0912845			6.12875	0.0191182			6.13228	0.0299588			6.12895	0.0513345			6.13062	0.0643209			6.13187	0.0328273			6.13208	0.0244975			6.13145	0.0805631			6.12895	0.149041
6.13895	0.0251159			6.13395	0.0624657			6.13728	0.078924			6.13895	0.0932366			6.13542	0.0210851			6.13895	0.0308827			6.13562	0.0519454			6.13728	0.0667498			6.13853	0.0326037			6.13875	0.0246912			6.13812	0.0823885			6.13562	0.154763
6.14562	0.0253469			6.14062	0.0629053			6.14395	0.0812188			6.14562	0.0954643			6.14208	0.0228211			6.14562	0.0324771			6.14228	0.0531673			6.14395	0.06897			6.1452	0.0325888			6.14542	0.0250265			6.14478	0.0845864			6.14228	0.160463
6.15228	0.026159			6.14728	0.0631437			6.15062	0.0834167			6.15228	0.097625			6.14875	0.0235736			6.15228	0.0347868			6.14895	0.0546053			6.15062	0.0705346			6.15187	0.0327826			6.15208	0.0254661			6.15145	0.0876412			6.14895	0.166267
6.15895	0.0271201			6.15395	0.0631809			6.15728	0.0855178			6.15895	0.0997111			6.15542	0.0235364			6.15895	0.03694			6.15562	0.0556335			6.15728	0.0717789			6.15853	0.0329465			6.15875	0.0262111			6.15812	0.0914857			6.15562	0.172459
6.16562	0.0283793			6.16062	0.0633225			6.16395	0.0876188			6.16562	0.101857			6.16208	0.0228509			6.16562	0.0384897			6.16228	0.0564978			6.16395	0.0728443			6.1652	0.0326559			6.16542	0.0268072			6.16478	0.0957325			6.16228	0.178821
6.17228	0.0298321			6.16728	0.0636056			6.17062	0.0895038			6.17228	0.10436			6.16875	0.0220686			6.17228	0.0398308			6.16895	0.0572205			6.17062	0.0740066			6.17187	0.0321716			6.17208	0.027217			6.17145	0.0996962			6.16895	0.184849
6.17895	0.0310689			6.17395	0.0637919			6.17728	0.0910237			6.17895	0.106752			6.17542	0.0214502			6.17895	0.0411123			6.17562	0.0572801			6.17728	0.0754297			6.17853	0.031516			6.17875	0.0274405			6.17812	0.10287			6.17562	0.190921
6.18562	0.0314862			6.18062	0.0640601			6.18395	0.0920817			6.18562	0.108637			6.18208	0.0211373			6.18562	0.041835			6.18228	0.0565797			6.18395	0.076741			6.1852	0.0313371			6.18542	0.0274405			6.18478	0.105061			6.18228	0.196882
6.19228	0.0309944			6.18728	0.0647306			6.19062	0.0925288			6.19228	0.110045			6.18875	0.02148			6.19228	0.0414774			6.18895	0.0558496			6.19062	0.0779107			6.19187	0.0317916			6.19208	0.0275522			6.19145	0.106573			6.18895	0.202559
6.19895	0.030309			6.19395	0.0654906			6.19728	0.0928193			6.19895	0.111498			6.19542	0.0220686			6.19895	0.0407919			6.19562	0.0561848			6.19728	0.0787452			6.19853	0.0327453			6.19875	0.027895			6.19812	0.10787			6.19562	0.207953
6.20562	0.0297576			6.20062	0.0662059			6.20395	0.0929832			6.20562	0.112996			6.20208	0.0227243			6.20562	0.0403672			6.20228	0.0574812			6.20395	0.0798032			6.2052	0.0342503			6.20542	0.0283718			6.20478	0.108965			6.20228	0.213377
6.21228	0.0295341			6.20728	0.066638			6.21062	0.0932291			6.21228	0.114284			6.20875	0.0226647			6.21228	0.0401512			6.20895	0.0593066			6.21062	0.0811368			6.21187	0.0359565			6.21208	0.0291616			6.21145	0.110462			6.20895	0.218935
6.21895	0.0297129			6.21395	0.0672862			6.21728	0.093393			6.21895	0.115499			6.21542	0.0222996			6.21895	0.0399128			6.21562	0.0612214			6.21728	0.0825971			6.21853	0.0377595			6.21875	0.0300705			6.21812	0.113145			6.21562	0.224255
6.22562	0.0304505			6.22062	0.067912			6.22395	0.0938326			6.22562	0.117324			6.22208	0.0222474			6.22562	0.0399575			6.22228	0.063546			6.22395	0.084348			6.2252	0.0389889			6.22542	0.0312403			6.22478	0.116974			6.22228	0.229836
6.23228	0.0313967			6.22728	0.0682622			6.23062	0.095129			6.23228	0.120021			6.22875	0.0224486			6.23228	0.0409707			6.22895	0.0656918			6.23062	0.0864789			6.23187	0.0397339			6.23208	0.0324175			6.23145	0.120968			6.22895	0.235945
6.23895	0.0321567			6.23395	0.0686496			6.23728	0.0967607			6.23895	0.122935			6.23542	0.0225827			6.23895	0.0426248			6.23562	0.0670478			6.23728	0.0891611			6.23853	0.0402033			6.23875	0.0334233			6.23812	0.124454			6.23562	0.242218
6.24562	0.0327975			6.24062	0.0693128			6.24395	0.0984147			6.24562	0.125796			6.24208	0.022389			6.24562	0.0440776			6.24228	0.0675693			6.24395	0.0917837			6.2452	0.0405312			6.24542	0.034675			6.24478	0.127926			6.24228	0.247836
6.25228	0.0331253			6.24728	0.0704899			6.25062	0.100061			6.25228	0.128567			6.24875	0.0225082			6.25228	0.0448599			6.24895	0.0677034			6.25062	0.0938624			6.25187	0.0407323			6.25208	0.0357404			6.25145	0.131518			6.24895	0.253074
6.25895	0.0331774			6.25395	0.0714511			6.25728	0.102222			6.25895	0.131257			6.25542	0.0228733			6.25895	0.0450388			6.25562	0.0678599			6.25728	0.0956506			6.25853	0.040397			6.25875	0.0364035			6.25812	0.134699			6.25562	0.258453
6.26562	0.0332743			6.26062	0.0719726			6.26395	0.104882			6.26562	0.133455			6.26208	0.0229031			6.26562	0.0448376			6.26228	0.0676811			6.26395	0.0974312			6.2652	0.039801			6.26542	0.0363588			6.26478	0.13689			6.26228	0.264004
6.27228	0.0336319			6.26728	0.0724047			6.27062	0.107624			6.27228	0.135154			6.26875	0.0223741			6.27228	0.0443161			6.26895	0.0677183			6.27062	0.0989661			6.27187	0.039272			6.27208	0.0362471			6.27145	0.1387			6.26895	0.269338
6.27895	0.0340343			6.27395	0.07274			6.27728	0.110164			6.27895	0.136696			6.27542	0.0215322			6.27895	0.0435114			6.27562	0.068076			6.27728	0.0998527			6.27853	0.0392422			6.27875	0.0364929			6.27812	0.140846			6.27562	0.27471
6.28562	0.0342131			6.28062	0.0730306			6.28395	0.112355			6.28562	0.138618			6.28208	0.021331			6.28562	0.0424013			6.28228	0.0689551			6.28395	0.100121			6.2852	0.0394136			6.28542	0.0370592			6.28478	0.143297			6.28228	0.280559
6.29228	0.034444			6.28728	0.0733882			6.29062	0.11389			6.29228	0.140756			6.28875	0.0218228			6.29228	0.0411719			6.28895	0.0699237			6.29062	0.100568			6.29187	0.0396222			6.29208	0.0377297			6.29145	0.145681			6.28895	0.286408
6.29895	0.0350028			6.29395	0.0742152			6.29728	0.114843			6.29895	0.142701			6.29542	0.0224784			6.29895	0.0403151			6.29562	0.0708476			6.29728	0.101231			6.29853	0.0400543			6.29875	0.0389144			6.29812	0.147797			6.29562	0.291832
6.30562	0.0356138			6.30062	0.075385			6.30395	0.115424			6.30562	0.144504			6.30208	0.0229925			6.30562	0.0401214			6.30228	0.0717193			6.30395	0.101887			6.3052	0.0409484			6.30542	0.0405386			6.30478	0.150241			6.30228	0.29631
6.31228	0.0362992			6.30728	0.0762269			6.31062	0.115752			6.31228	0.146411			6.30875	0.0234768			6.31228	0.0402033			6.30895	0.0723526			6.31062	0.102825			6.31187	0.0417605			6.31208	0.0418797			6.31145	0.152893			6.30895	0.300035
6.31895	0.0369176			6.31395	0.0764877			6.31728	0.116087			6.31895	0.148557			6.31542	0.0242293			6.31895	0.040181			6.31562	0.072889			6.31728	0.103772			6.31853	0.0419691			6.31875	0.0425279			6.31812	0.155248			6.31562	0.303283
6.32562	0.037536			6.32062	0.0764281			6.32395	0.116572			6.32562	0.150479			6.32208	0.0248924			6.32562	0.0402629			6.32228	0.073269			6.32395	0.104837			6.3252	0.041686			6.32542	0.0427365			6.32478	0.157185			6.32228	0.306278
6.33228	0.0378117			6.32728	0.0759736			6.33062	0.117324			6.33228	0.152119			6.32875	0.0250041			6.33228	0.0405833			6.32895	0.0734851			6.33062	0.105478			6.33187	0.0415593			6.33208	0.0434741			6.33145	0.159159			6.32895	0.309207
6.33895	0.0377223			6.33395	0.0751093			6.33728	0.117883			6.33895	0.154153			6.33542	0.0244677			6.33895	0.040777			6.33562	0.073202			6.33728	0.105798			6.33853	0.0416636			6.33875	0.0443757			6.33812	0.161879			6.33562	0.312075
6.34562	0.0375062			6.34062	0.0739619			6.34395	0.118181			6.34562	0.156753			6.34208	0.0237301			6.34562	0.04071			6.34228	0.0728592			6.34395	0.106297			6.3452	0.0417754			6.34542	0.0452772			6.34478	0.164852			6.34228	0.315629
6.35228	0.0374466			6.34728	0.0732318			6.35062	0.118442			6.35228	0.159465			6.34875	0.0232831			6.35228	0.0403374			6.34895	0.0731722			6.35062	0.106893			6.35187	0.0419989			6.35208	0.0461191			6.35145	0.16769			6.34895	0.319913
6.35895	0.0377968			6.35395	0.0732765			6.35728	0.119105			6.35895	0.161842			6.35542	0.0232458			6.35895	0.0402182			6.35562	0.0742748			6.35728	0.107586			6.35853	0.0425354			6.35875	0.0469461			6.35812	0.170082			6.35562	0.32448
6.36562	0.0384077			6.36062	0.0734851			6.36395	0.119999			6.36562	0.163957			6.36208	0.0232235			6.36562	0.040397			6.36228	0.0757426			6.36395	0.107944			6.3652	0.0434443			6.36542	0.047937			6.36478	0.172108			6.36228	0.328846
6.37228	0.0390038			6.36728	0.0738576			6.37062	0.120617			6.37228	0.166245			6.36875	0.0231788			6.37228	0.0406876			6.36895	0.0771657			6.37062	0.107832			6.37187	0.044249			6.37208	0.0485256			6.37145	0.173822			6.36895	0.332855
6.37895	0.0394881			6.37395	0.074558			6.37728	0.121124			6.37895	0.168599			6.37542	0.0234619			6.37895	0.0408515			6.37562	0.0786707			6.37728	0.107691			6.37853	0.0446886			6.37875	0.0490397			6.37812	0.175223			6.37562	0.33655
6.38562	0.0396073			6.38062	0.0758395			6.38395	0.121899			6.38562	0.171073			6.38208	0.0241175			6.38562	0.0407323			6.38228	0.0800565			6.38395	0.107504			6.3852	0.0447631			6.38542	0.0493526			6.38478	0.176407			6.38228	0.33962
6.39228	0.039041			6.38728	0.0768229			6.39062	0.123076			6.39228	0.17333			6.38875	0.0244826			6.39228	0.0409037			6.38895	0.080809			6.39062	0.107095			6.39187	0.0446215			6.39208	0.0498146			6.39145	0.177391			6.38895	0.342041
6.39895	0.0378191			6.39395	0.077121			6.39728	0.12403			6.39895	0.17526			6.39542	0.0241548			6.39895	0.0409558			6.39562	0.0808537			6.39728	0.106625			6.39853	0.0445768			6.39875	0.0503212			6.39812	0.178643			6.39562	0.343576
6.40562	0.0363514			6.40062	0.077039			6.40395	0.124909			6.40562	0.176556			6.40208	0.0234917			6.40562	0.0407845			6.40228	0.0804216			6.40395	0.106387			6.4052	0.0445992			6.40542	0.0504032			6.40478	0.1802			6.40228	0.34453
6.41228	0.0356808			6.40728	0.0770316			6.41062	0.126071			6.41228	0.177398			6.40875	0.022769			6.41228	0.0404567			6.40895	0.0799745			6.41062	0.106975			6.41187	0.0446141			6.41208	0.0503659			6.41145	0.181779			6.40895	0.345282
6.41895	0.0357702			6.41395	0.0773445			6.41728	0.127569			6.41895	0.177778			6.41542	0.021778			6.41895	0.0404492			6.41562	0.0796244			6.41728	0.107996			6.41853	0.0444055			6.41875	0.0501946			6.41812	0.182979			6.41562	0.346005
6.42562	0.0361279			6.42062	0.0776798			6.42395	0.129022			6.42562	0.177778			6.42208	0.0204146			6.42562	0.040628			6.42228	0.0790581			6.42395	0.108697			6.4252	0.043802			6.42542	0.0503361			6.42478	0.183657			6.42228	0.34643
6.43228	0.0365749			6.42728	0.078246			6.43062	0.130065			6.43228	0.177614			6.42875	0.0192374			6.43228	0.0405982			6.42895	0.0782683			6.43062	0.108927			6.43187	0.0431538			6.43208	0.0505671			6.43145	0.184521			6.42895	0.346638
6.43895	0.0370145			6.43395	0.0788495			6.43728	0.130951			6.43895	0.177681			6.43542	0.0184402			6.43895	0.0402108			6.43562	0.0772029			6.43728	0.108846			6.43853	0.0428557			6.43875	0.0509098			6.43812	0.185706			6.43562	0.347398
6.44562	0.0374988			6.44062	0.0796393			6.44395	0.131473			6.44562	0.178441			6.44208	0.0178739			6.44562	0.0396594			6.44228	0.0759959			6.44395	0.108816			6.4452	0.0427663			6.44542	0.0514761			6.44478	0.18698			6.44228	0.348829
6.45228	0.0373498			6.44728	0.0806302			6.45062	0.13189			6.45228	0.179745			6.44875	0.017345			6.45228	0.0390932			6.44895	0.0747591			6.45062	0.109047			6.45187	0.0425354			6.45208	0.0519305			6.45145	0.188239			6.44895	0.350423
6.45895	0.0366122			6.45395	0.0813901			6.45728	0.132069			6.45895	0.18122			6.45542	0.0174046			6.45895	0.0385568			6.45562	0.0736117			6.45728	0.10933			6.45853	0.0421703			6.45875	0.0519753			6.45812	0.18926			6.45562	0.351757
6.46562	0.03618			6.46062	0.0822097			6.46395	0.132084			6.46562	0.18245			6.46208	0.0180975			6.46562	0.0384524			6.46228	0.073038			6.46395	0.109561			6.4652	0.0423864			6.46542	0.0516176			6.46478	0.190519			6.46228	0.352837
6.47228	0.0363812			6.46728	0.0830814			6.47062	0.132039			6.47228	0.183582			6.46875	0.0191778			6.47228	0.0388026			6.46895	0.072673			6.47062	0.10971			6.47187	0.043042			6.47208	0.0513196			6.47145	0.19104			6.46895	0.353619
6.47895	0.0371113			6.47395	0.0841096			6.47728	0.131816			6.47895	0.184759			6.47542	0.0200868			6.47895	0.0394881			6.47562	0.0725016			6.47728	0.109568			6.47853	0.0431538			6.47875	0.0514686			6.47812	0.190437			6.47562	0.353798
6.48562	0.0378191			6.48062	0.0847355			6.48395	0.131525			6.48562	0.185862			6.48208	0.020653			6.48562	0.0398904			6.48228	0.0725016			6.48395	0.10927			6.4852	0.0428781			6.48542	0.0517443			6.48478	0.18961			6.48228	0.353284
6.49228	0.0382289			6.48728	0.0845939			6.49062	0.131063			6.49228	0.186563			6.48875	0.0211			6.49228	0.0399649			6.48895	0.072591			6.49062	0.108227			6.49187	0.0428483			6.49208	0.0522435			6.49145	0.189036			6.48895	0.352472
6.49895	0.0384971			6.49395	0.0841245			6.49728	0.13034			6.49895	0.187069			6.49542	0.0212118			6.49895	0.0401884			6.49562	0.0726432			6.49728	0.106588			6.49853	0.0437647			6.49875	0.0529513			6.49812	0.188872			6.49562	0.351496
6.50562	0.0386983			6.50062	0.0832826			6.50395	0.129521			6.50562	0.187404			6.50208	0.0209063			6.50562	0.0405088			6.50228	0.0721812			6.50395	0.104681			6.5052	0.0451282			6.50542	0.0539646			6.50478	0.18844			6.50228	0.350453
6.51228	0.0385866			6.50728	0.0824109			6.51062	0.128895			6.51228	0.187822			6.50875	0.0201091			6.51228	0.0405908			6.50895	0.0715703			6.51062	0.103086			6.51187	0.0459105			6.51208	0.0545979			6.51145	0.188179			6.50895	0.349119
6.51895	0.0380576			6.51395	0.0816211			6.51728	0.129215			6.51895	0.188343			6.51542	0.0193641			6.51895	0.0402257			6.51562	0.0706837			6.51728	0.102215			6.51853	0.0463203			6.51875	0.0547171			6.51812	0.188269			6.51562	0.347644
6.52562	0.0370592			6.52062	0.0814945			6.52395	0.130147			6.52562	0.189282			6.52208	0.0189468			6.52562	0.0403151			6.52228	0.0697002			6.52395	0.102125			6.5252	0.0464097			6.52542	0.0546798			6.52478	0.188157			6.52228	0.346296
6.53228	0.0363365			6.52728	0.0819638			6.53062	0.131227			6.53228	0.190452			6.52875	0.0188574			6.53228	0.0411868			6.52895	0.0689104			6.53062	0.10258			6.53187	0.0467673			6.53208	0.0544116			6.53145	0.187628			6.52895	0.345126
6.53895	0.03618			6.53395	0.082463			6.53728	0.132173			6.53895	0.191592			6.53542	0.0192374			6.53895	0.0419468			6.53562	0.0683889			6.53728	0.103183			6.53853	0.0470579			6.53875	0.0541732			6.53812	0.18663			6.53562	0.344127
6.54562	0.0361502			6.54062	0.0828281			6.54395	0.132658			6.54562	0.192679			6.54208	0.0201091			6.54562	0.0419915			6.54228	0.0681654			6.54395	0.103801			6.5452	0.0470653			6.54542	0.0538528			6.54478	0.185758			6.54228	0.342995
6.55228	0.0362992			6.54728	0.0832379			6.55062	0.13262			6.55228	0.193641			6.54875	0.0212193			6.55228	0.0415072			6.54895	0.0678152			6.55062	0.10433			6.55187	0.0470504			6.55208	0.0538155			6.55145	0.185385			6.54895	0.342019
6.55895	0.036411			6.55395	0.083819			6.55728	0.131652			6.55895	0.194386			6.55542	0.0219494			6.55895	0.0411943			6.55562	0.0675991			6.55728	0.104427			6.55853	0.0469089			6.55875	0.0536293			6.55812	0.185594			6.55562	0.341058
6.56562	0.0366569			6.56062	0.0841692			6.56395	0.130221			6.56562	0.194594			6.56208	0.022389			6.56562	0.0407174			6.56228	0.0674948			6.56395	0.103392			6.5652	0.046812			6.56542	0.0533909			6.56478	0.185952			6.56228	0.340186
6.57228	0.0364855			6.56728	0.0839978			6.57062	0.128582			6.57228	0.194415			6.56875	0.0226423			6.57228	0.0394434			6.56895	0.0672787			6.57062	0.101753			6.57187	0.0462383			6.57208	0.053443			6.57145	0.186324			6.56895	0.339396
6.57895	0.035964			6.57395	0.0833496			6.57728	0.127256			6.57895	0.194043			6.57542	0.0226125			6.57895	0.0377297			6.57562	0.0668317			6.57728	0.100151			6.57853	0.0455081			6.57875	0.0535995			6.57812	0.186786			6.57562	0.338495
6.58562	0.0353307			6.58062	0.0826046			6.58395	0.126742			6.58562	0.193708			6.58208	0.0222772			6.58562	0.0364631			6.58228	0.0662357			6.58395	0.0990704			6.5852	0.0448897			6.58542	0.0534207			6.58478	0.186943			6.58228	0.337653
6.59228	0.0348166			6.58728	0.0818819			6.59062	0.12707			6.59228	0.193655			6.58875	0.0216365			6.59228	0.0361428			6.58895	0.0657588			6.59062	0.0984445			6.59187	0.0448897			6.59208	0.0526831			6.59145	0.186235			6.58895	0.33652
6.59895	0.0344291			6.59395	0.0815764			6.59728	0.127696			6.59895	0.193931			6.59542	0.0213087			6.59895	0.0364855			6.59562	0.0649616			6.59728	0.0982583			6.59853	0.0452921			6.59875	0.0522733			6.59812	0.185132			6.59562	0.335313
6.60562	0.0339746			6.60062	0.0815988			6.60395	0.128381			6.60562	0.194557			6.60208	0.0214726			6.60562	0.036709			6.60228	0.0637248			6.60395	0.0986159			6.6052	0.0457019			6.60542	0.0518113			6.60478	0.184365			6.60228	0.33401
6.61228	0.0336319			6.60728	0.0819638			6.61062	0.129096			6.61228	0.195123			6.60875	0.0220835			6.61228	0.0368357			6.60895	0.0622645			6.61062	0.0990853			6.61187	0.0459477			6.61208	0.0511259			6.61145	0.183932			6.60895	0.332884
6.61895	0.0334382			6.61395	0.0825673			6.61728	0.12996			6.61895	0.195496			6.61542	0.0226721			6.61895	0.0368655			6.61562	0.0614524			6.61728	0.0992268			6.61853	0.0461116			6.61875	0.050433			6.61812	0.183679			6.61562	0.33199
6.62562	0.0337064			6.62062	0.0832751			6.62395	0.130564			6.62562	0.195511			6.62208	0.0229329			6.62562	0.0364631			6.62228	0.0614896			6.62395	0.0988469			6.6252	0.0461787			6.62542	0.0503734			6.62478	0.183776			6.62228	0.331156
6.63228	0.0342652			6.62728	0.0836849			6.63062	0.130698			6.63228	0.195295			6.62875	0.0231862			6.63228	0.0357181			6.62895	0.0622123			6.63062	0.0976101			6.63187	0.0460073			6.63208	0.0512451			6.63145	0.184432			6.62895	0.330664
6.63895	0.0351965			6.63395	0.0834838			6.63728	0.130415			6.63895	0.194974			6.63542	0.023663			6.63895	0.0347048			6.63562	0.0629872			6.63728	0.0958517			6.63853	0.0460297			6.63875	0.0522211			6.63812	0.184998			6.63562	0.330426
6.64562	0.0364929			6.64062	0.0829697			6.64395	0.129752			6.64562	0.194579			6.64208	0.0239536			6.64562	0.0341609			6.64228	0.0635013			6.64395	0.0939593			6.6452	0.0463352			6.64542	0.0533238			6.64478	0.184871			6.64228	0.329718
6.65228	0.0378862			6.64728	0.0825971			6.65062	0.128977			6.65228	0.194304			6.64875	0.0237823			6.65228	0.0343397			6.64895	0.0634789			6.65062	0.0922009			6.65187	0.0469163			6.65208	0.054501			6.65145	0.18391			6.64895	0.328287
6.65895	0.0389665			6.65395	0.0828728			6.65728	0.127867			6.65895	0.194162			6.65542	0.0231415			6.65895	0.0348762			6.65562	0.0624955			6.65728	0.0909939			6.65853	0.0474229			6.65875	0.055626			6.65812	0.182584			6.65562	0.326589
6.66562	0.039041			6.66062	0.0838265			6.66395	0.126891			6.66562	0.19481			6.66208	0.0222623			6.66562	0.0352412			6.66228	0.0608042			6.66395	0.0901371			6.6652	0.0478402			6.66542	0.0565574			6.66478	0.18125			6.66228	0.325248
6.67228	0.0381842			6.66728	0.0849143			6.67062	0.126369			6.67228	0.196248			6.66875	0.0212267			6.67228	0.035122			6.66895	0.0589415			6.67062	0.0900179			6.67187	0.0480413			6.67208	0.0570267			6.67145	0.180222			6.66895	0.323981
6.67895	0.0366941			6.67395	0.0854209			6.67728	0.126451			6.67895	0.198424			6.67542	0.0198856			6.67895	0.0351816			6.67562	0.0578016			6.67728	0.0901818			6.67853	0.0479296			6.67875	0.0569597			6.67812	0.179619			6.67562	0.322834
6.68562	0.0351444			6.68062	0.0853166			6.68395	0.12698			6.68562	0.200458			6.68208	0.0188649			6.68562	0.0356361			6.68228	0.0573844			6.68395	0.0903308			6.6852	0.0478178			6.68542	0.0564978			6.68478	0.179581			6.68228	0.322036
6.69228	0.0338033			6.68728	0.0849515			6.69062	0.127755			6.69228	0.202142			6.68875	0.0182092			6.69228	0.0360906			6.68895	0.0574961			6.69062	0.090532			6.69187	0.0477135			6.69208	0.0557229			6.69145	0.180148			6.68895	0.32115
6.69895	0.0327677			6.69395	0.084281			6.69728	0.128932			6.69895	0.203766			6.69542	0.0181273			6.69895	0.0364482			6.69562	0.0576153			6.69728	0.0903979			6.69853	0.0472367			6.69875	0.0551417			6.69812	0.180721			6.69562	0.319846
6.70562	0.032559			6.70062	0.0831112			6.70395	0.129826			6.70562	0.205018			6.70208	0.0183508			6.70562	0.0367165			6.70228	0.0574812			6.70395	0.0901148			6.7052	0.0463501			6.70542	0.0547022			6.70478	0.181042			6.70228	0.318199
6.71228	0.0330433			6.70728	0.0821799			6.71062	0.130191			6.71228	0.205509			6.70875	0.0188574			6.71228	0.0365153			6.70895	0.0567138			6.71062	0.0893474			6.71187	0.0454038			6.71208	0.0542402			6.71145	0.181131			6.70895	0.316866
6.71895	0.0339523			6.71395	0.0819713			6.71728	0.13043			6.71895	0.204548			6.71542	0.0194758			6.71895	0.0353083			6.71562	0.0556782			6.71728	0.0881478			6.71853	0.0445321			6.71875	0.0540167			6.71812	0.181168			6.71562	0.315569
6.72562	0.0346601			6.72062	0.0823513			6.72395	0.13078			6.72562	0.202931			6.72208	0.019677			6.72562	0.0333488			6.72228	0.0547022			6.72395	0.0865683			6.7252	0.0437498			6.72542	0.0539944			6.72478	0.181019			6.72228	0.314467
6.73228	0.0353381			6.72728	0.0828654			6.73062	0.130862			6.73228	0.20159			6.72875	0.0195727			6.73228	0.0316799			6.72895	0.0538155			6.73062	0.0847429			6.73187	0.0433773			6.73208	0.054121			6.73145	0.180639			6.72895	0.313722
6.73895	0.0361651			6.73395	0.0830814			6.73728	0.130497			6.73895	0.200793			6.73542	0.0191778			6.73895	0.0305772			6.73562	0.0531003			6.73728	0.0829473			6.73853	0.0439882			6.73875	0.0540912			6.73812	0.180468			6.73562	0.313461
6.74562	0.0368506			6.74062	0.0832081			6.74395	0.130102			6.74562	0.2001			6.74208	0.0187531			6.74562	0.0301898			6.74228	0.0527799			6.74395	0.0810921			6.7452	0.0447929			6.74542	0.0540093			6.74478	0.180349			6.74228	0.313237
6.75228	0.0373647			6.74728	0.0829846			6.75062	0.12999			6.75228	0.19937			6.74875	0.0184104			6.75228	0.0304058			6.74895	0.0531748			6.75062	0.0793487			6.75187	0.0453219			6.75208	0.0540614			6.75145	0.180103			6.74895	0.312835
6.75895	0.0376403			6.75395	0.0826046			6.75728	0.129752			6.75895	0.199318			6.75542	0.018321			6.75895	0.031516			6.75562	0.0536665			6.75728	0.0782609			6.75853	0.0454336			6.75875	0.0539497			6.75812	0.179708			6.75562	0.312194
6.76562	0.0379533			6.76062	0.0822321			6.76395	0.129156			6.76562	0.200152			6.76208	0.0183508			6.76562	0.03317			6.76228	0.0537783			6.76395	0.077948			6.7652	0.0452399			6.76542	0.0539944			6.76478	0.179194			6.76228	0.311159
6.77228	0.0381246			6.76728	0.0817478			6.77062	0.128813			6.77228	0.201307			6.76875	0.0182018			6.77228	0.0344589			6.76895	0.0538304			6.77062	0.0784099			6.77187	0.044249			6.77208	0.0542924			6.77145	0.178359			6.76895	0.309959
6.77895	0.0380129			6.77395	0.0814572			6.77728	0.128597			6.77895	0.202067			6.77542	0.0180006			6.77895	0.0351071			6.77562	0.0543371			6.77728	0.0792593			6.77853	0.0425503			6.77875	0.0548363			6.77812	0.177078			6.77562	0.308648
6.78562	0.0375733			6.78062	0.0811964			6.78395	0.128381			6.78562	0.202596			6.78208	0.0180006			6.78562	0.0352636			6.78228	0.0548437			6.78395	0.0800863			6.7852	0.0412688			6.78542	0.0551119			6.78478	0.176281			6.78228	0.308089
6.79228	0.0367761			6.78728	0.0813156			6.79062	0.127845			6.79228	0.203066			6.78875	0.0182092			6.79228	0.0352263			6.78895	0.0546575			6.79062	0.0806376			6.79187	0.0409037			6.79208	0.0552163			6.79145	0.176154			6.78895	0.308283
6.79895	0.0359416			6.79395	0.0815988			6.79728	0.127263			6.79895	0.203334			6.79542	0.0183582			6.79895	0.0346825			6.79562	0.05389			6.79728	0.0804439			6.79853	0.0414848			6.79875	0.0553653			6.79812	0.176273			6.79562	0.308976
6.80562	0.0351742			6.80062	0.0816584			6.80395	0.126667			6.80562	0.203334			6.80208	0.0184923			6.80562	0.033915			6.80228	0.0532344			6.80395	0.0797212			6.8052	0.0427887			6.80542	0.0553653			6.80478	0.176258			6.80228	0.309534
6.81228	0.0344291			6.80728	0.0814795			6.81062	0.126056			6.81228	0.203244			6.80875	0.0185072			6.81228	0.0334382			6.80895	0.0526384			6.81062	0.0783652			6.81187	0.0449792			6.81208	0.0553876			6.81145	0.176348			6.80895	0.309341
6.81895	0.0337809			6.81395	0.0810847			6.81728	0.125781			6.81895	0.203393			6.81542	0.0184476			6.81895	0.033468			6.81562	0.051558			6.81728	0.0769049			6.81853	0.0474378			6.81875	0.0551865			6.81812	0.176825			6.81562	0.3087
6.82562	0.0334159			6.82062	0.0806674			6.82395	0.126034			6.82562	0.203572			6.82208	0.0186339			6.82562	0.0337511			6.82228	0.0503659			6.82395	0.075832			6.8252	0.0493973			6.82542	0.0550896			6.82478	0.17681			6.82228	0.307307
6.83228	0.0332966			6.82728	0.0795648			6.83062	0.126548			6.83228	0.203602			6.82875	0.019148			6.83228	0.0340492			6.82895	0.0494793			6.83062	0.075236			6.83187	0.0502989			6.83208	0.0550672			6.83145	0.175945			6.82895	0.305511
6.83895	0.0332817			6.83395	0.0779852			6.83728	0.126936			6.83895	0.20384			6.83542	0.0198632			6.83895	0.0341237			6.83562	0.0491589			6.83728	0.0753924			6.83853	0.0504404			6.83875	0.0553727			6.83812	0.174679			6.83562	0.303678
6.84562	0.0332892			6.84062	0.0767484			6.84395	0.127286			6.84562	0.204444			6.84208	0.0206381			6.84562	0.0335947			6.84228	0.0492558			6.84395	0.0759438			6.8452	0.050135			6.84542	0.0561029			6.84478	0.173792			6.84228	0.302278
6.85228	0.0337586			6.84728	0.0765026			6.85062	0.127673			6.85228	0.205152			6.84875	0.02148			6.85228	0.0327826			6.84895	0.0495687			6.85062	0.0766888			6.85187	0.0497401			6.85208	0.0567883			6.85145	0.173815			6.84895	0.301577
6.85895	0.0343025			6.85395	0.0768602			6.85728	0.128016			6.85895	0.205643			6.85542	0.0219643			6.85895	0.0318736			6.85562	0.050053			6.85728	0.0773519			6.85853	0.0494868			6.85875	0.0571236			6.85812	0.174388			6.85562	0.301376
6.86562	0.0347421			6.86062	0.0773892			6.86395	0.128634			6.86562	0.206158			6.86208	0.0218451			6.86562	0.0312254			6.86228	0.0499561			6.86395	0.0777245			6.8652	0.0492036			6.86542	0.0567734			6.86478	0.175267			6.86228	0.301339
6.87228	0.0349209			6.86728	0.078246			6.87062	0.129759			6.87228	0.206932			6.86875	0.021331			6.87228	0.0308231			6.86895	0.0492632			6.87062	0.0779256			6.87187	0.0492036			6.87208	0.0558943			6.87145	0.176124			6.86895	0.301026
6.87895	0.0350401			6.87395	0.0794604			6.87728	0.131078			6.87895	0.20764			6.87542	0.020951			6.87895	0.031054			6.87562	0.04825			6.87728	0.0780672			6.87853	0.0490993			6.87875	0.0549406			6.87812	0.176892			6.87562	0.300221
6.88562	0.0351444			6.88062	0.0805706			6.88395	0.132114			6.88562	0.207692			6.88208	0.0206158			6.88562	0.0318736			6.88228	0.0473931			6.88395	0.0781789			6.8852	0.0488237			6.88542	0.05389			6.88478	0.177592			6.88228	0.299446
6.89228	0.0347495			6.88728	0.0813827			6.89062	0.132829			6.89228	0.207633			6.88875	0.0202134			6.89228	0.0327379			6.88895	0.0468716			6.89062	0.0782683			6.89187	0.0478923			6.89208	0.053145			6.89145	0.178061			6.88895	0.299208
6.89895	0.0340268			6.89395	0.0821277			6.89728	0.133589			6.89895	0.207976			6.89542	0.0199825			6.89895	0.0331774			6.89562	0.0468343			6.89728	0.0776425			6.89853	0.0466928			6.89875	0.0530332			6.89812	0.178456			6.89562	0.299416
6.90562	0.0330433			6.90062	0.0828728			6.90395	0.133798			6.90562	0.208579			6.90208	0.0201464			6.90562	0.032939			6.90228	0.0476688			6.90395	0.0764653			6.9052	0.0459552			6.90542	0.054054			6.90478	0.178635			6.90228	0.299782
6.91228	0.0324845			6.90728	0.0836849			6.91062	0.132799			6.91228	0.209123			6.90875	0.0206083			6.91228	0.0323504			6.90895	0.0489801			6.91062	0.0752807			6.91187	0.0458285			6.91208	0.0558645			6.91145	0.178732			6.90895	0.299916
6.91895	0.0326261			6.91395	0.0843406			6.91728	0.13148			6.91895	0.209659			6.91542	0.0207275			6.91895	0.0317171			6.91562	0.0500977			6.91728	0.0742152			6.91853	0.0463352			6.91875	0.05766			6.91812	0.178598			6.91562	0.299849
6.92562	0.0335798			6.92062	0.0849813			6.92395	0.130512			6.92562	0.210859			6.92208	0.020735			6.92562	0.0310764			6.92228	0.0504106			6.92395	0.0734776			6.9252	0.0470206			6.92542	0.0590235			6.92478	0.178114			6.92228	0.299647
6.93228	0.0345558			6.92728	0.0849515			6.93062	0.130057			6.93228	0.212401			6.92875	0.0210926			6.93228	0.0304505			6.92895	0.0500605			6.93062	0.0728294			6.93187	0.047721			6.93208	0.0597015			6.93145	0.177227			6.92895	0.299297
6.93895	0.0351071			6.93395	0.0845045			6.93728	0.129499			6.93895	0.213571			6.93542	0.0221953			6.93895	0.0300482			6.93562	0.0493824			6.93728	0.0726581			6.93853	0.0478104			6.93875	0.0599995			6.93812	0.175923			6.93562	0.298597
6.94562	0.0350997			6.94062	0.0841022			6.94395	0.128917			6.94562	0.214525			6.94208	0.0230968			6.94562	0.0299737			6.94228	0.0481084			6.94395	0.0730529			6.9452	0.0473261			6.94542	0.0598207			6.94478	0.174984			6.94228	0.297457
6.95228	0.0351518			6.94728	0.0840127			6.95062	0.129007			6.95228	0.215314			6.94875	0.0227839			6.95228	0.0300929			6.94895	0.0466704			6.95062	0.0736192			6.95187	0.0464767			6.95208	0.0593141			6.95145	0.174828			6.94895	0.296265
6.95895	0.0351965			6.95395	0.0838637			6.95728	0.129357			6.95895	0.216179			6.95542	0.0218302			6.95895	0.0299886			6.95562	0.0455827			6.95728	0.0739321			6.95853	0.0454709			6.95875	0.0585318			6.95812	0.175387			6.95562	0.295445
6.96562	0.0349879			6.96062	0.0835285			6.96395	0.130169			6.96562	0.216842			6.96208	0.0208467			6.96562	0.0299886			6.96228	0.0453144			6.96395	0.073269			6.9652	0.0443235			6.96542	0.0580698			6.96478	0.176229			6.96228	0.29511
6.97228	0.0347942			6.96728	0.0833347			6.97062	0.131011			6.97228	0.217266			6.96875	0.0203699			6.97228	0.0300631			6.96895	0.0454485			6.97062	0.072062			6.97187	0.0433847			6.97208	0.0576079			6.97145	0.176884			6.96895	0.295222
6.97895	0.0350028			6.97395	0.0833943			6.97728	0.131831			6.97895	0.218041			6.97542	0.0198856			6.97895	0.0303537			6.97562	0.0452101			6.97728	0.0710636			6.97853	0.0432357			6.97875	0.0567064			6.97812	0.177443			6.97562	0.295721
6.98562	0.0358894			6.98062	0.0833869			6.98395	0.132322			6.98562	0.219055			6.98208	0.0195652			6.98562	0.0306815			6.98228	0.0450015			6.98395	0.0702217			6.9852	0.0437498			6.98542	0.055708			6.98478	0.177763			6.98228	0.296406
6.99228	0.0366196			6.98728	0.0833198			6.99062	0.13262			6.99228	0.220366			6.98875	0.0201538			6.99228	0.0309572			6.98895	0.0452772			6.99062	0.0694692			6.99187	0.044629			6.99208	0.0552088			6.99145	0.177681			6.98895	0.297181
6.99895	0.0364035			6.99395	0.0836775			6.99728	0.133127			6.99895	0.221498			6.99542	0.0213385			6.99895	0.0312403			6.99562	0.0460818			6.99728	0.0687018			6.99853	0.0457689			6.99875	0.0554621			6.99812	0.177212			6.99562	0.297703
7.00562	0.035055			7.00062	0.0838041			7.00395	0.133507			7.00562	0.222228			7.00208	0.0225306			7.00562	0.0311285			7.00228	0.0465959			7.00395	0.0682548			7.0052	0.0471771			7.00542	0.0557452			7.00478	0.176735			7.00228	0.297904
7.01228	0.0335872			7.00728	0.0836924			7.01062	0.133865			7.01228	0.222594			7.00875	0.0229776			7.01228	0.0304431			7.00895	0.0465438			7.01062	0.0677854			7.01187	0.0486895			7.01208	0.0565127			7.01145	0.17646			7.00895	0.297837
7.01895	0.0327453			7.01395	0.0832304			7.01728	0.134148			7.01895	0.222646			7.01542	0.0227913			7.01895	0.0293031			7.01562	0.0465065			7.01728	0.0669509			7.01853	0.0500381			7.01875	0.0579357			7.01812	0.176303			7.01562	0.297606
7.02562	0.0324845			7.02062	0.0831634			7.02395	0.13452			7.02562	0.222988			7.02208	0.0223517			7.02562	0.0283942			7.02228	0.0469089			7.02395	0.0663251			7.0252	0.050813			7.02542	0.0596344			7.02478	0.175804			7.02228	0.29739
7.03228	0.0320077			7.02728	0.0833571			7.03062	0.134587			7.03228	0.223733			7.02875	0.0216514			7.03228	0.0282302			7.02895	0.0474527			7.03062	0.0660345			7.03187	0.0506639			7.03208	0.060983			7.03145	0.175156			7.02895	0.297152
7.03895	0.0321642			7.03395	0.083603			7.03728	0.134356			7.03895	0.225015			7.03542	0.0210032			7.03895	0.0283569			7.03562	0.0472069			7.03728	0.0659451			7.03853	0.0496209			7.03875	0.061579			7.03812	0.174724			7.03562	0.297077
7.04562	0.0334159			7.04062	0.084348			7.04395	0.133991			7.04562	0.226669			7.04208	0.0205934			7.04562	0.0285059			7.04228	0.0459105			7.04395	0.0659972			7.0452	0.0486597			7.04542	0.061579			7.04478	0.174649			7.04228	0.297159
7.05228	0.035353			7.04728	0.0853762			7.05062	0.133559			7.05228	0.228725			7.04875	0.0201613			7.05228	0.0287443			7.04895	0.0442192			7.05062	0.0663847			7.05187	0.0482202			7.05208	0.0609905			7.05145	0.17482			7.04895	0.297219
7.05895	0.0368506			7.05395	0.0864193			7.05728	0.133485			7.05895	0.230864			7.05542	0.0197962			7.05895	0.0290126			7.05562	0.0431091			7.05728	0.0672266			7.05853	0.0476316			7.05875	0.0607073			7.05812	0.175081			7.05562	0.297159
7.06562	0.0375137			7.06062	0.0869408			7.06395	0.133909			7.06562	0.2326			7.06208	0.0194535			7.06562	0.0289753			7.06228	0.0427365			7.06395	0.067912			7.0652	0.0470132			7.06542	0.0608265			7.06478	0.175469			7.06228	0.297114
7.07228	0.0380799			7.06728	0.0870302			7.07062	0.134952			7.07228	0.234053			7.06875	0.0191405			7.07228	0.0284612			7.06895	0.0424981			7.07062	0.0683814			7.07187	0.0468865			7.07208	0.0610724			7.07145	0.175796			7.06895	0.297137
7.07895	0.0381023			7.07395	0.0867695			7.07728	0.136077			7.07895	0.235312			7.07542	0.0188574			7.07895	0.027746			7.07562	0.0425354			7.07728	0.0686646			7.07853	0.0474602			7.07875	0.0613183			7.07812	0.175975			7.07562	0.297509
7.08562	0.0375733			7.08062	0.0864789			7.08395	0.137247			7.08562	0.23663			7.08208	0.0185743			7.08562	0.0273809			7.08228	0.0431612			7.08395	0.0686124			7.0852	0.0476241			7.08542	0.0618324			7.08478	0.176132			7.08228	0.29809
7.09228	0.0362396			7.08728	0.0864789			7.09062	0.138432			7.09228	0.23786			7.08875	0.0187606			7.09228	0.0275671			7.08895	0.0441745			7.09062	0.0685155			7.09187	0.0470653			7.09208	0.0626445			7.09145	0.176653			7.08895	0.298686
7.09895	0.034675			7.09395	0.086844			7.09728	0.13946			7.09895	0.23926			7.09542	0.0189543			7.09895	0.0282377			7.09562	0.0448599			7.09728	0.0684485			7.09853	0.0466332			7.09875	0.0631213			7.09812	0.17748			7.09562	0.298977
7.10562	0.0333861			7.10062	0.0869408			7.10395	0.139974			7.10562	0.240617			7.10208	0.0190958			7.10562	0.0289083			7.10228	0.0448897			7.10395	0.0685155			7.1052	0.0465587			7.10542	0.0629202			7.10478	0.178322			7.10228	0.298813
7.11228	0.0328049			7.10728	0.0867024			7.11062	0.140056			7.11228	0.241652			7.10875	0.0195801			7.11228	0.0292584			7.10895	0.044547			7.11062	0.0684038			7.11187	0.0465363			7.11208	0.0621676			7.11145	0.178821			7.10895	0.298478
7.11895	0.03317			7.11395	0.0865683			7.11728	0.139914			7.11895	0.242226			7.11542	0.0207201			7.11895	0.0293925			7.11562	0.0441894			7.11728	0.0681952			7.11853	0.0462085			7.11875	0.0611097			7.11812	0.179067			7.11562	0.297844
7.12562	0.0339672			7.12062	0.0866577			7.12395	0.139482			7.12562	0.242472			7.12208	0.0221729			7.12562	0.0294			7.12228	0.0439957			7.12395	0.0683218			7.1252	0.0460967			7.12542	0.0600964			7.12478	0.179037			7.12228	0.297084
7.13228	0.0349581			7.12728	0.0871792			7.13062	0.138834			7.13228	0.242531			7.12875	0.0232235			7.13228	0.0293702			7.12895	0.0442788			7.13062	0.0684187			7.13187	0.0463873			7.13208	0.0592619			7.13145	0.17871			7.12895	0.296399
7.13895	0.0359789			7.13395	0.0876784			7.13728	0.138044			7.13895	0.242524			7.13542	0.0239834			7.13895	0.0292733			7.13562	0.0446811			7.13728	0.0681281			7.13853	0.0468865			7.13875	0.0584722			7.13812	0.178054			7.13562	0.296243
7.14562	0.0370294			7.14062	0.0882819			7.14395	0.137508			7.14562	0.242673			7.14208	0.0244826			7.14562	0.0294447			7.14228	0.0450015			7.14395	0.0677034			7.1452	0.0472367			7.14542	0.0578016			7.14478	0.177398			7.14228	0.296734
7.15228	0.0376627			7.14728	0.0890344			7.15062	0.137389			7.15228	0.243291			7.14875	0.0243261			7.15228	0.0298545			7.14895	0.0452101			7.15062	0.0674725			7.15187	0.0475347			7.15208	0.0576824			7.15145	0.177167			7.14895	0.297643
7.15895	0.0373721			7.15395	0.0898167			7.15728	0.137649			7.15895	0.244305			7.15542	0.0230074			7.15895	0.0304133			7.15562	0.0453293			7.15728	0.067398			7.15853	0.0479147			7.15875	0.0583902			7.15812	0.17754			7.15562	0.298426
7.16562	0.0366718			7.16062	0.0906438			7.16395	0.138313			7.16562	0.245571			7.16208	0.0209957			7.16562	0.0309795			7.16228	0.0453591			7.16395	0.0673607			7.1652	0.0481158			7.16542	0.0594333			7.16478	0.17824			7.16228	0.298873
7.17228	0.036031			7.16728	0.0910386			7.17062	0.139549			7.17228	0.247091			7.16875	0.0193119			7.17228	0.0314862			7.16895	0.0452772			7.17062	0.0674501			7.17187	0.0479296			7.17208	0.0606179			7.17145	0.178531			7.16895	0.299163
7.17895	0.0355542			7.17395	0.0913441			7.17728	0.1413			7.17895	0.248574			7.17542	0.0182837			7.17895	0.031732			7.17562	0.0452176			7.17728	0.0681281			7.17853	0.0475124			7.17875	0.0617355			7.17812	0.178307			7.17562	0.299431
7.18562	0.0348091			7.18062	0.091657			7.18395	0.143088			7.18562	0.249915			7.18208	0.0179186			7.18562	0.0315532			7.18228	0.0449941			7.18395	0.0688806			7.1852	0.0475198			7.18542	0.0629127			7.18478	0.178039			7.18228	0.299394
7.19228	0.0340566			7.18728	0.0917017			7.19062	0.144035			7.19228	0.250965			7.18875	0.0182837			7.19228	0.0310838			7.18895	0.0444576			7.19062	0.0694618			7.19187	0.0480041			7.19208	0.0637248			7.19145	0.178166			7.18895	0.298873
7.19895	0.033699			7.19395	0.0913218			7.19728	0.144139			7.19895	0.252038			7.19542	0.0194311			7.19895	0.0305623			7.19562	0.04372			7.19728	0.06973			7.19853	0.0485033			7.19875	0.0639111			7.19812	0.178181			7.19562	0.298217
7.20562	0.0335872			7.20062	0.0904426			7.20395	0.143975			7.20562	0.253402			7.20208	0.0208393			7.20562	0.0299439			7.20228	0.0432357			7.20395	0.0698864			7.2052	0.0487641			7.20542	0.063844			7.20478	0.177972			7.20228	0.297718
7.21228	0.0336319			7.20728	0.0896603			7.21062	0.143804			7.21228	0.25472			7.20875	0.0218377			7.21228	0.0294819			7.20895	0.0429228			7.21062	0.0699237			7.21187	0.0487417			7.21208	0.0637993			7.21145	0.178076			7.20895	0.297189
7.21895	0.0341982			7.21395	0.0890791			7.21728	0.143796			7.21895	0.255711			7.21542	0.0227913			7.21895	0.0292584			7.21562	0.0426099			7.21728	0.0694096			7.21853	0.0488758			7.21875	0.0640377			7.21812	0.179186			7.21562	0.296623
7.22562	0.0350699			7.22062	0.0890046			7.22395	0.143804			7.22562	0.256732			7.22208	0.0236779			7.22562	0.0293851			7.22228	0.0421926			7.22395	0.0686124			7.2252	0.0487641			7.22542	0.0644103			7.22478	0.180744			7.22228	0.296362
7.23228	0.0357851			7.22728	0.0892878			7.23062	0.144035			7.23228	0.257924			7.22875	0.0241995			7.23228	0.0296384			7.22895	0.0417382			7.23062	0.0678971			7.23187	0.0482947			7.23208	0.064753			7.23145	0.181958			7.22895	0.296451
7.23895	0.0362843			7.23395	0.089854			7.23728	0.144728			7.23895	0.259355			7.23542	0.0240728			7.23895	0.0296384			7.23562	0.0413209			7.23728	0.0677109			7.23853	0.047572			7.23875	0.0649616			7.23812	0.182636			7.23562	0.29666
7.24562	0.0368804			7.24062	0.0905022			7.24395	0.145733			7.24562	0.260592			7.24208	0.0236481			7.24562	0.0293627			7.24228	0.0404939			7.24395	0.0676066			7.2452	0.0469759			7.24542	0.0648871			7.24478	0.182964			7.24228	0.296772
7.25228	0.03732			7.24728	0.0912845			7.25062	0.14694			7.25228	0.261925			7.24875	0.0231266			7.25228	0.0289753			7.24895	0.0396892			7.25062	0.0675172			7.25187	0.0467226			7.25208	0.0648126			7.25145	0.182912			7.24895	0.296734
7.25895	0.0368282			7.25395	0.0923127			7.25728	0.148043			7.25895	0.263467			7.25542	0.0222027			7.25895	0.028953			7.25562	0.0394285			7.25728	0.0674948			7.25853	0.046432			7.25875	0.0647902			7.25812	0.18198			7.25562	0.296555
7.26562	0.0358671			7.26062	0.0932068			7.26395	0.149116			7.26562	0.264898			7.26208	0.0210479			7.26562	0.0288859			7.26228	0.0399873			7.26395	0.0676885			7.2652	0.046432			7.26542	0.0644922			7.26478	0.180416			7.26228	0.296131
7.27228	0.0350997			7.26728	0.0937581			7.27062	0.150427			7.27228	0.266068			7.26875	0.0202507			7.27228	0.0285357			7.26895	0.0412241			7.27062	0.0678301			7.27187	0.0468045			7.27208	0.0636205			7.27145	0.178657			7.26895	0.295833
7.27895	0.0347421			7.27395	0.0938028			7.27728	0.151888			7.27895	0.266917			7.27542	0.0197962			7.27895	0.028044			7.27562	0.0428632			7.27728	0.0675321			7.27853	0.0476986			7.27875	0.0628084			7.27812	0.177413			7.27562	0.295706
7.28562	0.0344217			7.28062	0.0938997			7.28395	0.153609			7.28562	0.267483			7.28208	0.0193492			7.28562	0.0278205			7.28228	0.0447184			7.28395	0.067085			7.2852	0.0487044			7.28542	0.0624955			7.28478	0.176519			7.28228	0.295654
7.29228	0.0340194			7.28728	0.0941306			7.29062	0.154831			7.29228	0.267826			7.28875	0.0190511			7.29228	0.0277981			7.28895	0.0462085			7.29062	0.0668541			7.29187	0.0497326			7.29208	0.0626147			7.29145	0.175953			7.28895	0.29587
7.29895	0.033915			7.29395	0.0943616			7.29728	0.155337			7.29895	0.268549			7.29542	0.019066			7.29895	0.0276044			7.29562	0.0469908			7.29728	0.0670031			7.29853	0.0506714			7.29875	0.062637			7.29812	0.175722			7.29562	0.296123
7.30562	0.0343397			7.30062	0.0942796			7.30395	0.155069			7.30562	0.269771			7.30208	0.0195503			7.30562	0.0273958			7.30228	0.0475571			7.30395	0.0669509			7.3052	0.0513792			7.30542	0.0629798			7.30478	0.176035			7.30228	0.296421
7.31228	0.0350997			7.30728	0.0942498			7.31062	0.154428			7.31228	0.270873			7.30875	0.0202283			7.31228	0.0276193			7.30895	0.0482574			7.31062	0.0665337			7.31187	0.0517964			7.31208	0.0640377			7.31145	0.176743			7.30895	0.296362
7.31895	0.0358596			7.31395	0.0943393			7.31728	0.153802			7.31895	0.271194			7.31542	0.0209212			7.31895	0.0284091			7.31562	0.0488758			7.31728	0.0662208			7.31853	0.052087			7.31875	0.0650808			7.31812	0.177376			7.31562	0.296049
7.32562	0.0365078			7.32062	0.0941083			7.32395	0.152759			7.32562	0.271283			7.32208	0.0213832			7.32562	0.0295267			7.32228	0.0493303			7.32395	0.0664443			7.3252	0.0520647			7.32542	0.0654459			7.32478	0.17795			7.32228	0.295155
7.33228	0.0372902			7.32728	0.0933781			7.33062	0.151835			7.33228	0.271887			7.32875	0.0215098			7.33228	0.030376			7.32895	0.0496134			7.33062	0.0667199			7.33187	0.0514314			7.33208	0.064984			7.33145	0.178665			7.32895	0.293911
7.33895	0.0381246			7.33395	0.0923425			7.33728	0.151828			7.33895	0.273041			7.33542	0.0213981			7.33895	0.0306368			7.33562	0.0496358			7.33728	0.0665411			7.33853	0.0503361			7.33875	0.0644475			7.33812	0.179574			7.33562	0.292614
7.34562	0.0385866			7.34062	0.0917912			7.34395	0.152998			7.34562	0.274017			7.34208	0.0211075			7.34562	0.0305921			7.34228	0.0488907			7.34395	0.0662357			7.3452	0.0492036			7.34542	0.0640303			7.34478	0.1802			7.34228	0.291392
7.35228	0.0383556			7.34728	0.0913963			7.35062	0.154741			7.35228	0.274815			7.34875	0.020355			7.35228	0.030376			7.34895	0.0472367			7.35062	0.0661984			7.35187	0.0479892			7.35208	0.0636354			7.35145	0.180282			7.34895	0.290386
7.35895	0.0376403			7.35395	0.0911653			7.35728	0.156187			7.35895	0.275992			7.35542	0.019595			7.35895	0.0297874			7.35562	0.0454187			7.35728	0.0663474			7.35853	0.0463277			7.35875	0.0632256			7.35812	0.179932			7.35562	0.28953
7.36562	0.0365227			7.36062	0.0911877			7.36395	0.157245			7.36562	0.277676			7.36208	0.0192672			7.36562	0.0288337			7.36228	0.043869			7.36395	0.066191			7.3652	0.0452772			7.36542	0.0628754			7.36478	0.179529			7.36228	0.289448
7.37228	0.035204			7.36728	0.0910982			7.37062	0.157878			7.37228	0.279099			7.36875	0.0196174			7.37228	0.027813			7.36895	0.0428259			7.37062	0.0658035			7.37187	0.045225			7.37208	0.0623688			7.37145	0.178851			7.36895	0.289664
7.37895	0.0340566			7.37395	0.0904873			7.37728	0.157654			7.37895	0.279658			7.37542	0.0203028			7.37895	0.0271797			7.37562	0.0421852			7.37728	0.0654683			7.37853	0.0458881			7.37875	0.0617877			7.37812	0.177763			7.37562	0.289798
7.38562	0.0334159			7.38062	0.0893101			7.38395	0.156991			7.38562	0.279814			7.38208	0.020884			7.38562	0.0269562			7.38228	0.0418276			7.38395	0.065431			7.3852	0.046283			7.38542	0.0613555			7.38478	0.176556			7.38228	0.289612
7.39228	0.033401			7.38728	0.0883937			7.39062	0.156537			7.39228	0.280574			7.38875	0.0213608			7.39228	0.0271499			7.38895	0.0418574			7.39062	0.0657439			7.39187	0.0465736			7.39208	0.0612363			7.39145	0.175804			7.38895	0.288904
7.39895	0.0338852			7.39395	0.0879541			7.39728	0.156343			7.39895	0.28193			7.39542	0.0218675			7.39895	0.0276044			7.39562	0.0421554			7.39728	0.0662655			7.39853	0.0472963			7.39875	0.0615194			7.39812	0.17564			7.39562	0.28798
7.40562	0.0345632			7.40062	0.0875816			7.40395	0.156097			7.40562	0.283316			7.40208	0.0225082			7.40562	0.0280216			7.40228	0.0425875			7.40395	0.0667349			7.4052	0.0477955			7.40542	0.0622422			7.40478	0.175439			7.40228	0.286758
7.41228	0.0351667			7.40728	0.0875071			7.41062	0.155874			7.41228	0.284404			7.40875	0.0231564			7.41228	0.0282004			7.40895	0.0428259			7.41062	0.0666976			7.41187	0.048019			7.41208	0.0632107			7.41145	0.175126			7.40895	0.285797
7.41895	0.0354648			7.41395	0.0881255			7.41728	0.156239			7.41895	0.285298			7.41542	0.0235587			7.41895	0.028111			7.41562	0.0430271			7.41728	0.0662431			7.41853	0.0481233			7.41875	0.064075			7.41812	0.175074			7.41562	0.285216
7.42562	0.0355542			7.42062	0.0895485			7.42395	0.157073			7.42562	0.28649			7.42208	0.0237599			7.42562	0.0277385			7.42228	0.0432506			7.42395	0.0654235			7.4252	0.0484884			7.42542	0.0645667			7.42478	0.175655			7.42228	0.284836
7.43228	0.0357181			7.42728	0.0909939			7.43062	0.157639			7.43228	0.287734			7.42875	0.0236705			7.43228	0.0272989			7.42895	0.0435337			7.43062	0.0646785			7.43187	0.0488162			7.43208	0.064835			7.43145	0.176303			7.42895	0.284374
7.43895	0.0360012			7.43395	0.0919178			7.43728	0.158057			7.43895	0.289269			7.43542	0.0230372			7.43895	0.0272468			7.43562	0.0437573			7.43728	0.0643209			7.43853	0.0488386			7.43875	0.0650659			7.43812	0.176422			7.43562	0.283696
7.44562	0.036642			7.44062	0.0924543			7.44395	0.15898			7.44562	0.290908			7.44208	0.0220239			7.44562	0.0274181			7.44228	0.0439212			7.44395	0.0641644			7.4452	0.0487044			7.44542	0.0648126			7.44478	0.176102			7.44228	0.282846
7.45228	0.0374317			7.44728	0.0927821			7.45062	0.160687			7.45228	0.292689			7.44875	0.0209212			7.45228	0.0277683			7.44895	0.0439808			7.45062	0.0642389			7.45187	0.0485852			7.45208	0.0642166			7.45145	0.175789			7.44895	0.281923
7.45895	0.0380278			7.45395	0.092797			7.45728	0.162482			7.45895	0.294499			7.45542	0.0203177			7.45895	0.0281334			7.45562	0.0436306			7.45728	0.0642985			7.45853	0.0486076			7.45875	0.0633672			7.45812	0.175491			7.45562	0.281192
7.46562	0.0384152			7.46062	0.0923648			7.46395	0.163741			7.46562	0.296198			7.46208	0.0197291			7.46562	0.028491			7.46228	0.0433251			7.46395	0.0646934			7.4652	0.0488237			7.46542	0.0626221			7.46478	0.174426			7.46228	0.280902
7.47228	0.0386387			7.46728	0.0919774			7.47062	0.164665			7.47228	0.29771			7.46875	0.0190437			7.47228	0.0286475			7.46895	0.0433251			7.47062	0.0652596			7.47187	0.0492707			7.47208	0.0621006			7.47145	0.172675			7.46895	0.281028
7.47895	0.0384748			7.47395	0.0924319			7.47728	0.165567			7.47895	0.298373			7.47542	0.0184923			7.47895	0.0282601			7.47562	0.0433177			7.47728	0.0654012			7.47853	0.0500083			7.47875	0.0620857			7.47812	0.171095			7.47562	0.281103
7.48562	0.0379756			7.48062	0.0936836			7.48395	0.166237			7.48562	0.298031			7.48208	0.0182688			7.48562	0.0279024			7.48228	0.0427887			7.48395	0.0651702			7.4852	0.050813			7.48542	0.0624806			7.48478	0.170328			7.48228	0.281177
7.49228	0.0375211			7.48728	0.0950471			7.49062	0.166148			7.49228	0.297152			7.48875	0.0182688			7.49228	0.0277162			7.48895	0.0419766			7.49062	0.0649095			7.49187	0.0512674			7.49208	0.063099			7.49145	0.169881			7.48895	0.280894
7.49895	0.0376254			7.49395	0.0960305			7.49728	0.165246			7.49895	0.296667			7.49542	0.0180677			7.49895	0.0275299			7.49562	0.0417084			7.49728	0.0652969			7.49853	0.0511333			7.49875	0.063546			7.49812	0.169262			7.49562	0.280082
7.50562	0.0381321			7.50062	0.0965521			7.50395	0.164278			7.50562	0.296816			7.50208	0.0182986			7.50562	0.0272617			7.50228	0.0420138			7.50395	0.0658557			7.5052	0.0508949			7.50542	0.0636578			7.50478	0.168845			7.50228	0.278801
7.51228	0.0384673			7.50728	0.0968948			7.51062	0.163779			7.51228	0.297472			7.50875	0.0192374			7.51228	0.0269189			7.50895	0.042282			7.51062	0.0661835			7.51187	0.0507087			7.51208	0.0634864			7.51145	0.168756			7.50895	0.277556
7.51895	0.0388324			7.51395	0.0968426			7.51728	0.163905			7.51895	0.298716			7.51542	0.0206754			7.51895	0.0270978			7.51562	0.0422746			7.51728	0.0663474			7.51853	0.050351			7.51875	0.0627413			7.51812	0.168674			7.51562	0.276536
7.52562	0.0391304			7.52062	0.0966117			7.52395	0.164144			7.52562	0.300616			7.52208	0.0217929			7.52562	0.0275001			7.52228	0.0422895			7.52395	0.0665411			7.5252	0.0498071			7.52542	0.0619739			7.52478	0.168227			7.52228	0.275373
7.53228	0.039354			7.52728	0.0967011			7.53062	0.164151			7.53228	0.302762			7.52875	0.022158			7.53228	0.0279322			7.52895	0.0421554			7.53062	0.0664741			7.53187	0.0493675			7.53208	0.0614524			7.53145	0.167578			7.52895	0.274241
7.53895	0.0392273			7.53395	0.0974014			7.53728	0.164434			7.53895	0.304319			7.53542	0.02186			7.53895	0.0282675			7.53562	0.0417605			7.53728	0.0659451			7.53853	0.0492334			7.53875	0.0612885			7.53812	0.166826			7.53562	0.273377
7.54562	0.0383556			7.54062	0.098452			7.54395	0.165313			7.54562	0.305288			7.54208	0.0211746			7.54562	0.0286475			7.54228	0.04071			7.54395	0.0652224			7.5452	0.0489429			7.54542	0.0613108			7.54478	0.166133			7.54228	0.272736
7.55228	0.0371858			7.54728	0.0993013			7.55062	0.166766			7.55228	0.305936			7.54875	0.0203624			7.55228	0.0290349			7.54895	0.0393614			7.55062	0.0643805			7.55187	0.0483841			7.55208	0.0612587			7.55145	0.165656			7.54895	0.272028
7.55895	0.0360832			7.55395	0.0996515			7.55728	0.168093			7.55895	0.306517			7.55542	0.0195876			7.55895	0.0289455			7.55562	0.0381321			7.55728	0.0634417			7.55853	0.0479892			7.55875	0.0610873			7.55812	0.165164			7.55562	0.271536
7.56562	0.0357553			7.56062	0.0998005			7.56395	0.168964			7.56562	0.307128			7.56208	0.0189841			7.56562	0.0283718			7.56228	0.0374988			7.56395	0.0626594			7.5652	0.0480041			7.56542	0.0609457			7.56478	0.164658			7.56228	0.271678
7.57228	0.0357479			7.56728	0.0997931			7.57062	0.169747			7.57228	0.308156			7.56875	0.0186786			7.57228	0.027664			7.56895	0.0378042			7.57062	0.0626147			7.57187	0.0482202			7.57208	0.0609905			7.57145	0.16395			7.56895	0.271909
7.57895	0.0360459			7.57395	0.0996068			7.57728	0.170603			7.57895	0.309691			7.57542	0.0188798			7.57895	0.0272617			7.57562	0.0384971			7.57728	0.0634119			7.57853	0.048466			7.57875	0.0614002			7.57812	0.163473			7.57562	0.271477
7.58562	0.03656			7.58062	0.0992343			7.58395	0.171132			7.58562	0.311434			7.58208	0.0192672			7.58562	0.027135			7.58228	0.039205			7.58395	0.0645518			7.5852	0.0487044			7.58542	0.0620857			7.58478	0.16319			7.58228	0.270382
7.59228	0.0370741			7.58728	0.0988096			7.59062	0.17111			7.59228	0.312939			7.58875	0.0194237			7.59228	0.027068			7.58895	0.0395998			7.59062	0.0654012			7.59187	0.0490472			7.59208	0.0631735			7.59145	0.162944			7.58895	0.26904
7.59895	0.0376329			7.59395	0.0986531			7.59728	0.170842			7.59895	0.313945			7.59542	0.0191852			7.59895	0.0271201			7.59562	0.0397339			7.59728	0.0654981			7.59853	0.0493154			7.59875	0.0648052			7.59812	0.162855			7.59562	0.267327
7.60562	0.0378788			7.60062	0.0984296			7.60395	0.170752			7.60562	0.314884			7.60208	0.0190288			7.60562	0.0271723			7.60228	0.0394285			7.60395	0.0652447			7.6052	0.0494793			7.60542	0.0665188			7.60478	0.162907			7.60228	0.265166
7.61228	0.0381991			7.60728	0.09799			7.61062	0.170797			7.61228	0.315808			7.60875	0.0190958			7.61228	0.0271425			7.60895	0.0384971			7.61062	0.0650734			7.61187	0.0496507			7.61208	0.0676215			7.61145	0.163354			7.60895	0.263311
7.61895	0.0381544			7.61395	0.0976026			7.61728	0.170797			7.61895	0.316672			7.61542	0.0191256			7.61895	0.0270158			7.61562	0.0372306			7.61728	0.0646338			7.61853	0.0495538			7.61875	0.0677183			7.61812	0.163794			7.61562	0.262491
7.62562	0.0381768			7.62062	0.097625			7.62395	0.17111			7.62562	0.316851			7.62208	0.0190958			7.62562	0.0268072			7.62228	0.0362992			7.62395	0.0637174			7.6252	0.0489652			7.62542	0.0671223			7.62478	0.164032			7.62228	0.262238
7.63228	0.0385493			7.62728	0.0981912			7.63062	0.171691			7.63228	0.316754			7.62875	0.019297			7.63228	0.0264943			7.62895	0.0362024			7.63062	0.0626519			7.63187	0.048317			7.63208	0.0660568			7.63145	0.164002			7.62895	0.262238
7.63895	0.0387356			7.63395	0.098832			7.63728	0.172518			7.63895	0.317007			7.63542	0.0197366			7.63895	0.0261813			7.63562	0.0365674			7.63728	0.062272			7.63853	0.0478402			7.63875	0.064604			7.63812	0.163659			7.63562	0.262566
7.64562	0.0384897			7.64062	0.099577			7.64395	0.173487			7.64562	0.3177			7.64208	0.0199601			7.64562	0.0263751			7.64228	0.0370368			7.64395	0.0620857			7.6452	0.0475347			7.64542	0.0629425			7.64478	0.162899			7.64228	0.262983
7.65228	0.0379011			7.64728	0.100523			7.65062	0.174545			7.65228	0.318415			7.64875	0.0203401			7.65228	0.0271127			7.64895	0.0374913			7.65062	0.0616983			7.65187	0.0469983			7.65208	0.0615492			7.65145	0.162005			7.64895	0.262976
7.65895	0.0375733			7.65395	0.101618			7.65728	0.175305			7.65895	0.319086			7.65542	0.0209287			7.65895	0.0280961			7.65562	0.038147			7.65728	0.0613704			7.65853	0.0466183			7.65875	0.0607967			7.65812	0.161439			7.65562	0.26229
7.66562	0.0376329			7.66062	0.102542			7.66395	0.175513			7.66562	0.319898			7.66208	0.0213906			7.66562	0.0291243			7.66228	0.0384375			7.66395	0.0612065			7.6652	0.0467151			7.66542	0.0605583			7.66478	0.161387			7.66228	0.261292
7.67228	0.0378489			7.66728	0.102945			7.67062	0.175565			7.67228	0.320889			7.66875	0.0216141			7.67228	0.03016			7.66895	0.0381097			7.67062	0.0608861			7.67187	0.047043			7.67208	0.0603274			7.67145	0.161812			7.66895	0.260018
7.67895	0.0381321			7.67395	0.102974			7.67728	0.175722			7.67895	0.322022			7.67542	0.0217855			7.67895	0.0310987			7.67562	0.0376403			7.67728	0.0602528			7.67853	0.0475943			7.67875	0.0599176			7.67812	0.162445			7.67562	0.258557
7.68562	0.0384971			7.68062	0.10255			7.68395	0.176162			7.68562	0.322931			7.68208	0.0220314			7.68562	0.0316128			7.68228	0.0375062			7.68395	0.0599995			7.6852	0.0482425			7.68542	0.0592321			7.68478	0.16319			7.68228	0.256933
7.69228	0.038892			7.68728	0.101782			7.69062	0.177115			7.69228	0.323735			7.68875	0.0217929			7.69228	0.0315011			7.68895	0.0378564			7.69062	0.0601634			7.69187	0.0487641			7.69208	0.0588447			7.69145	0.163801			7.68895	0.255592
7.69895	0.0394732			7.69395	0.100747			7.69728	0.178739			7.69895	0.324428			7.69542	0.0214204			7.69895	0.0308901			7.69562	0.0380874			7.69728	0.0602752			7.69853	0.0484958			7.69875	0.0589043			7.69812	0.163913			7.69562	0.254668
7.70562	0.0396967			7.70062	0.0996962			7.70395	0.18061			7.70562	0.325374			7.70208	0.0213757			7.70562	0.0300184			7.70228	0.038527			7.70395	0.0602603			7.7052	0.0479445			7.70542	0.0592992			7.70478	0.16357			7.70228	0.254296
7.71228	0.039354			7.70728	0.0988692			7.71062	0.181951			7.71228	0.326723			7.70875	0.0213534			7.71228	0.0293553			7.70895	0.0392124			7.71062	0.0603795			7.71187	0.0476316			7.71208	0.0598133			7.71145	0.162579			7.70895	0.254221
7.71895	0.0387058			7.71395	0.0984371			7.71728	0.182778			7.71895	0.328138			7.71542	0.0209063			7.71895	0.0288561			7.71562	0.040032			7.71728	0.060685			7.71853	0.0473112			7.71875	0.0602305			7.71812	0.161536			7.71562	0.254273
7.72562	0.0381991			7.72062	0.0986531			7.72395	0.183418			7.72562	0.329584			7.72208	0.0204146			7.72562	0.0283122			7.72228	0.0404641			7.72395	0.0606105			7.7252	0.0467375			7.72542	0.060685			7.72478	0.160716			7.72228	0.254475
7.73228	0.0381172			7.72728	0.0993237			7.73062	0.184156			7.73228	0.330642			7.72875	0.0201613			7.73228	0.0280738			7.72895	0.0401884			7.73062	0.0599399			7.73187	0.0462383			7.73208	0.0606999			7.73145	0.159778			7.72895	0.254475
7.73895	0.0378862			7.73395	0.0999272			7.73728	0.184909			7.73895	0.331298			7.73542	0.019975			7.73895	0.0284091			7.73562	0.0397861			7.73728	0.0591129			7.73853	0.0465661			7.73875	0.0602081			7.73812	0.158697			7.73562	0.253841
7.74562	0.0376329			7.74062	0.100285			7.74395	0.185773			7.74562	0.33202			7.74208	0.0198185			7.74562	0.0289604			7.74228	0.03957			7.74395	0.0584275			7.7452	0.0473484			7.74542	0.0594333			7.74478	0.157483			7.74228	0.252523
7.75228	0.037387			7.74728	0.100717			7.75062	0.186786			7.75228	0.332616			7.74875	0.020124			7.75228	0.0290126			7.74895	0.0395775			7.75062	0.0581145			7.75187	0.0478104			7.75208	0.0589713			7.75145	0.15676			7.74895	0.251234
7.75895	0.0374019			7.75395	0.101447			7.75728	0.187755			7.75895	0.333019			7.75542	0.0209287			7.75895	0.0285432			7.75562	0.0394285			7.75728	0.058271			7.75853	0.0477582			7.75875	0.0591129			7.75812	0.156291			7.75562	0.250511
7.76562	0.0375062			7.76062	0.101849			7.76395	0.188529			7.76562	0.333093			7.76208	0.0215247			7.76562	0.0280961			7.76228	0.0392422			7.76395	0.0589192			7.7652	0.0472963			7.76542	0.0597164			7.76478	0.155963			7.76228	0.250161
7.77228	0.0375584			7.76728	0.101767			7.77062	0.18879			7.77228	0.333473			7.76875	0.0215396			7.77228	0.027895			7.76895	0.0391677			7.77062	0.0599921			7.77187	0.0468343			7.77208	0.060752			7.77145	0.156082			7.76895	0.249468
7.77895	0.0375733			7.77395	0.101946			7.77728	0.188433			7.77895	0.334479			7.77542	0.0211373			7.77895	0.0277609			7.77562	0.0391155			7.77728	0.0608787			7.77853	0.0462085			7.77875	0.0617579			7.77812	0.156604			7.77562	0.248365
7.78562	0.0375062			7.78062	0.102714			7.78395	0.187919			7.78562	0.33579			7.78208	0.0204369			7.78562	0.0276044			7.78228	0.0389069			7.78395	0.0613555			7.7852	0.0454858			7.78542	0.0619665			7.78478	0.157274			7.78228	0.247553
7.79228	0.0376925			7.78728	0.10363			7.79062	0.187889			7.79228	0.336967			7.78875	0.0198185			7.79228	0.027366			7.78895	0.0385642			7.79062	0.0611469			7.79187	0.0449568			7.79208	0.0612587			7.79145	0.157669			7.78895	0.247441
7.79895	0.038296			7.79395	0.104152			7.79728	0.188321			7.79895	0.338048			7.79542	0.0198558			7.79895	0.0271052			7.79562	0.0382811			7.79728	0.0604019			7.79853	0.0451729			7.79875	0.0602677			7.79812	0.157952			7.79562	0.247188
7.80562	0.0391677			7.80062	0.104718			7.80395	0.18882			7.80562	0.33915			7.80208	0.0206381			7.80562	0.0269264			7.80228	0.0380352			7.80395	0.0596195			7.8052	0.0463277			7.80542	0.0596941			7.80478	0.158191			7.80228	0.246271
7.81228	0.0398308			7.80728	0.105657			7.81062	0.189334			7.81228	0.340082			7.80875	0.0220388			7.81228	0.0267401			7.80895	0.0380352			7.81062	0.0589341			7.81187	0.0476837			7.81208	0.0589639			7.81145	0.158377			7.80895	0.244953
7.81895	0.0401884			7.81395	0.106357			7.81728	0.19002			7.81895	0.340521			7.81542	0.023745			7.81895	0.0266805			7.81562	0.0379831			7.81728	0.0585169			7.81853	0.0491589			7.81875	0.0578761			7.81812	0.158206			7.81562	0.244021
7.82562	0.0407472			7.82062	0.106521			7.82395	0.190489			7.82562	0.340313			7.82208	0.0256151			7.82562	0.0268146			7.82228	0.0376999			7.82395	0.0581741			7.8252	0.0504926			7.82542	0.0570789			7.82478	0.157654			7.82228	0.243112
7.83228	0.041537			7.82728	0.106283			7.83062	0.190459			7.83228	0.340074			7.82875	0.0269935			7.83228	0.0272393			7.82895	0.0375211			7.83062	0.0580773			7.83187	0.0512674			7.83208	0.056833			7.83145	0.156954			7.82895	0.24157
7.83895	0.0418723			7.83395	0.105783			7.83728	0.189938			7.83895	0.340141			7.83542	0.0272617			7.83895	0.0278503			7.83562	0.0377148			7.83728	0.057973			7.83853	0.0506938			7.83875	0.0565574			7.83812	0.156134			7.83562	0.239626
7.84562	0.0416562			7.84062	0.10518			7.84395	0.189342			7.84562	0.340581			7.84208	0.0268593			7.84562	0.0282079			7.84228	0.0380352			7.84395	0.0574365			7.8452	0.0490025			7.84542	0.0561327			7.84478	0.155136			7.84228	0.237994
7.85228	0.0414252			7.84728	0.104599			7.85062	0.188872			7.85228	0.341162			7.84875	0.0262335			7.85228	0.0284687			7.84895	0.0380278			7.85062	0.0567287			7.85187	0.0471249			7.85208	0.0562817			7.85145	0.15384			7.84895	0.236854
7.85895	0.0418499			7.85395	0.104107			7.85728	0.188753			7.85895	0.341855			7.85542	0.0255778			7.85895	0.0282228			7.85562	0.0380948			7.85728	0.0564158			7.85853	0.0454634			7.85875	0.0572577			7.85812	0.152797			7.85562	0.235841
7.86562	0.0425577			7.86062	0.103414			7.86395	0.188917			7.86562	0.343055			7.86208	0.0246316			7.86562	0.0275448			7.86228	0.0383183			7.86395	0.0570267			7.8652	0.0440329			7.86542	0.0580549			7.86478	0.152238			7.86228	0.235043
7.87228	0.0426173			7.86728	0.102788			7.87062	0.18888			7.87228	0.344545			7.86875	0.023298			7.87228	0.0268593			7.86895	0.0384971			7.87062	0.0583157			7.87187	0.0433177			7.87208	0.0580698			7.87145	0.151858			7.86895	0.234559
7.87895	0.0421926			7.87395	0.102967			7.87728	0.189006			7.87895	0.345774			7.87542	0.0218228			7.87895	0.0267103			7.87562	0.0386015			7.87728	0.0599399			7.87853	0.0437573			7.87875	0.0578538			7.87812	0.151299			7.87562	0.234619
7.88562	0.0416711			7.88062	0.103794			7.88395	0.18952			7.88562	0.346594			7.88208	0.0203922			7.88562	0.0273213			7.88228	0.038974			7.88395	0.0615269			7.8852	0.045158			7.88542	0.0574216			7.88478	0.150517			7.88228	0.234559
7.89228	0.0411794			7.88728	0.1048			7.89062	0.190385			7.89228	0.347108			7.88875	0.0192448			7.89228	0.0279546			7.88895	0.0396818			7.89062	0.0629053			7.89187	0.0470132			7.89208	0.0567809			7.89145	0.149593			7.88895	0.234567
7.89895	0.0405312			7.89395	0.105649			7.89728	0.19142			7.89895	0.347912			7.89542	0.0181794			7.89895	0.0286102			7.89562	0.0401959			7.89728	0.0636503			7.89853	0.0485554			7.89875	0.0559986			7.89812	0.148848			7.89562	0.234641
7.90562	0.0398159			7.90062	0.106931			7.90395	0.192598			7.90562	0.348672			7.90208	0.0171587			7.90562	0.0293404			7.90228	0.0405386			7.90395	0.0635386			7.9052	0.0496134			7.90542	0.0555366			7.90478	0.148505			7.90228	0.23447
7.91228	0.0396371			7.90728	0.108264			7.91062	0.194341			7.91228	0.349529			7.90875	0.0165328			7.91228	0.0299588			7.90895	0.0407472			7.91062	0.0626221			7.91187	0.0497103			7.91208	0.055559			7.91145	0.148475			7.90895	0.233956
7.91895	0.0401214			7.91395	0.109151			7.91728	0.19598			7.91895	0.350483			7.91542	0.0164062			7.91895	0.0301003			7.91562	0.0408143			7.91728	0.0612065			7.91853	0.0491664			7.91875	0.0554398			7.91812	0.148222			7.91562	0.233069
7.92562	0.040859			7.92062	0.109665			7.92395	0.197373			7.92562	0.351325			7.92208	0.0164509			7.92562	0.0292808			7.92228	0.0405535			7.92395	0.0600964			7.9252	0.0481531			7.92542	0.0550821			7.92478	0.148013			7.92228	0.232652
7.93228	0.041686			7.92728	0.109829			7.93062	0.198387			7.93228	0.352263			7.92875	0.0164583			7.93228	0.0276491			7.92895	0.040032			7.93062	0.0595748			7.93187	0.0466406			7.93208	0.0546351			7.93145	0.148624			7.92895	0.232853
7.93895	0.0419915			7.93395	0.110187			7.93728	0.198796			7.93895	0.35318			7.93542	0.0167266			7.93895	0.0257865			7.93562	0.0395849			7.93728	0.0594333			7.93853	0.0451654			7.93875	0.0542998			7.93812	0.149488			7.93562	0.233561
7.94562	0.041686			7.94062	0.110127			7.94395	0.198387			7.94562	0.354595			7.94208	0.0175461			7.94562	0.0243783			7.94228	0.0396147			7.94395	0.0593439			7.9452	0.0442043			7.94542	0.0545159			7.94478	0.149958			7.94228	0.234224
7.95228	0.0411868			7.94728	0.109978			7.95062	0.197642			7.95228	0.356004			7.94875	0.0186935			7.95228	0.0238493			7.94895	0.0400171			7.95062	0.0593662			7.95187	0.0444129			7.95208	0.0550672			7.95145	0.150092			7.94895	0.234663
7.95895	0.0408813			7.95395	0.109784			7.95728	0.197574			7.95895	0.357434			7.95542	0.0198409			7.95895	0.0235662			7.95562	0.0404194			7.95728	0.0597164			7.95853	0.0451207			7.95875	0.055939			7.95812	0.150837			7.95562	0.234857
7.96562	0.0409484			7.96062	0.109799			7.96395	0.198163			7.96562	0.359051			7.96208	0.0209212			7.96562	0.0233948			7.96228	0.0406206			7.96395	0.0599623			7.9652	0.0457987			7.96542	0.0567734			7.96478	0.151724			7.96228	0.234805
7.97228	0.0411123			7.96728	0.110179			7.97062	0.198916			7.97228	0.360802			7.96875	0.0220388			7.97228	0.0235662			7.96895	0.0408441			7.97062	0.0595748			7.97187	0.0462383			7.97208	0.0575483			7.97145	0.151597			7.96895	0.234358
7.97895	0.0416413			7.97395	0.110671			7.97728	0.199564			7.97895	0.361979			7.97542	0.022985			7.97895	0.0240356			7.97562	0.0412092			7.97728	0.0590086			7.97853	0.0465885			7.97875	0.0582486			7.97812	0.15074			7.97562	0.233367
7.98562	0.0426397			7.98062	0.111505			7.98395	0.200383			7.98562	0.361912			7.98208	0.0233054			7.98562	0.024572			7.98228	0.0414029			7.98395	0.0586361			7.9852	0.046663			7.98542	0.0585616			7.98478	0.149824			7.98228	0.232495
7.99228	0.0435561			7.98728	0.112385			7.99062	0.201367			7.99228	0.361577			7.98875	0.0228956			7.99228	0.0248104			7.98895	0.0410974			7.99062	0.0585616			7.99187	0.0462085			7.99208	0.0584796			7.99145	0.149235			7.98895	0.232019
7.99895	0.0440329			7.99395	0.113212			7.99728	0.202119			7.99895	0.361428			7.99542	0.0222698			7.99895	0.0249594			7.99562	0.0407025			7.99728	0.0583529			7.99853	0.0455454			7.99875	0.0580251			7.99812	0.148773			7.99562	0.232011
8.00562	0.0440255			8.00062	0.113204			8.00395	0.202499			8.00562	0.361465			8.00208	0.0219271			8.00562	0.0251234			8.00228	0.0404492			8.00395	0.0583977			8.0052	0.0451654			8.00542	0.0575334			8.00478	0.148609			8.00228	0.232168
8.01228	0.0438616			8.00728	0.112429			8.01062	0.202745			8.01228	0.361294			8.00875	0.0219047			8.01228	0.0248551			8.00895	0.0402108			8.01062	0.0588298			8.01187	0.0452399			8.01208	0.0569895			8.01145	0.149123			8.00895	0.2326
8.01895	0.0438318			8.01395	0.111431			8.01728	0.202827			8.01895	0.361681			8.01542	0.0217929			8.01895	0.0243038			8.01562	0.0398308			8.01728	0.0594482			8.01853	0.0454187			8.01875	0.0560954			8.01812	0.149727			8.01562	0.233419
8.02562	0.0440106			8.02062	0.111058			8.02395	0.202782			8.02562	0.363			8.02208	0.0218004			8.02562	0.0235662			8.02228	0.0393987			8.02395	0.0598505			8.0252	0.0456199			8.02542	0.0550076			8.02478	0.150092			8.02228	0.234142
8.03228	0.0444055			8.02728	0.111386			8.03062	0.202402			8.03228	0.364393			8.02875	0.0219494			8.03228	0.0230893			8.02895	0.0392348			8.03062	0.0600815			8.03187	0.0455752			8.03208	0.0541732			8.03145	0.150234			8.02895	0.234567
8.03895	0.0448972			8.03395	0.112064			8.03728	0.202224			8.03895	0.365362			8.03542	0.0222027			8.03895	0.0228882			8.03562	0.0391528			8.03728	0.0605062			8.03853	0.0455603			8.03875	0.053905			8.03812	0.150196			8.03562	0.234954
8.04562	0.0452921			8.04062	0.113033			8.04395	0.202514			8.04562	0.36595			8.04208	0.0220686			8.04562	0.0230446			8.04228	0.0389218			8.04395	0.060901			8.0452	0.0454187			8.04542	0.0541061			8.04478	0.150166			8.04228	0.235423
8.05228	0.0455081			8.04728	0.113957			8.05062	0.203274			8.05228	0.366844			8.04875	0.021264			8.05228	0.0239387			8.04895	0.0386015			8.05062	0.0613853			8.05187	0.0453442			8.05208	0.0542626			8.05145	0.150152			8.04895	0.235796
8.05895	0.0452399			8.05395	0.114411			8.05728	0.204511			8.05895	0.367917			8.05542	0.0204369			8.05895	0.0251755			8.05562	0.0383556			8.05728	0.0619218			8.05853	0.0453666			8.05875	0.0546053			8.05812	0.150308			8.05562	0.235982
8.06562	0.0442266			8.06062	0.114277			8.06395	0.206046			8.06562	0.369042			8.06208	0.0199452			8.06562	0.0260398			8.06228	0.038363			8.06395	0.0625849			8.0652	0.045523			8.06542	0.0551194			8.06478	0.150569			8.06228	0.236511
8.07228	0.0430942			8.06728	0.11415			8.07062	0.207879			8.07228	0.369906			8.06875	0.0201464			8.07228	0.0261217			8.06895	0.0383779			8.07062	0.0633746			8.07187	0.0460297			8.07208	0.0556707			8.07145	0.150844			8.06895	0.237517
8.07895	0.0424162			8.07395	0.114232			8.07728	0.20913			8.07895	0.370286			8.07542	0.0206903			8.07895	0.0260472			8.07562	0.0382289			8.07728	0.0642464			8.07853	0.0467077			8.07875	0.0557899			8.07812	0.151038			8.07562	0.23789
8.08562	0.0426024			8.08062	0.114568			8.08395	0.209242			8.08562	0.370413			8.08208	0.021033			8.08562	0.0264123			8.08228	0.0383779			8.08395	0.0646487			8.0852	0.0473037			8.08542	0.0554472			8.08478	0.150934			8.08228	0.237465
8.09228	0.0427663			8.08728	0.115052			8.09062	0.208236			8.09228	0.370681			8.08875	0.0212863			8.09228	0.0272244			8.08895	0.0388622			8.09062	0.0640675			8.09187	0.0474825			8.09208	0.0553429			8.09145	0.150546			8.08895	0.236757
8.09895	0.0427216			8.09395	0.115596			8.09728	0.206783			8.09895	0.371166			8.09542	0.0213087			8.09895	0.0279918			8.09562	0.0393987			8.09728	0.0628978			8.09853	0.0472516			8.09875	0.0555962			8.09812	0.150286			8.09562	0.236645
8.10562	0.0426173			8.10062	0.115693			8.10395	0.205621			8.10562	0.37168			8.10208	0.0211224			8.10562	0.028789			8.10228	0.0395402			8.10395	0.0619292			8.1052	0.0467375			8.10542	0.0560135			8.10478	0.150301			8.10228	0.236891
8.11228	0.0424758			8.10728	0.115089			8.11062	0.204951			8.11228	0.372209			8.10875	0.0205636			8.11228	0.0295416			8.10895	0.0395477			8.11062	0.0612587			8.11187	0.0460744			8.11208	0.056468			8.11145	0.150487			8.10895	0.23675
8.11895	0.0420809			8.11395	0.114098			8.11728	0.204742			8.11895	0.372626			8.11542	0.0198185			8.11895	0.0299588			8.11562	0.0396669			8.11728	0.0608489			8.11853	0.0451058			8.11875	0.0572428			8.11812	0.151098			8.11562	0.236884
8.12562	0.0412241			8.12062	0.11304			8.12395	0.20498			8.12562	0.372544			8.12208	0.0194609			8.12562	0.0298396			8.12228	0.039801			8.12395	0.0608116			8.1252	0.0442341			8.12542	0.0580996			8.12478	0.152096			8.12228	0.237934
8.13228	0.0404492			8.12728	0.112139			8.13062	0.205651			8.13228	0.371814			8.12875	0.0195727			8.13228	0.029102			8.12895	0.0399277			8.13062	0.0613853			8.13187	0.0437126			8.13208	0.0586361			8.13145	0.15296			8.12895	0.239886
8.13895	0.0400841			8.13395	0.111543			8.13728	0.206627			8.13895	0.370838			8.13542	0.0198111			8.13895	0.0282973			8.13562	0.0403151			8.13728	0.0621378			8.13853	0.04334			8.13875	0.0585616			8.13812	0.153609			8.13562	0.241905
8.14562	0.0403672			8.14062	0.111707			8.14395	0.207052			8.14562	0.369862			8.14208	0.0200346			8.14562	0.0277907			8.14228	0.0407696			8.14395	0.0625774			8.1452	0.043273			8.14542	0.0583231			8.14478	0.153854			8.14228	0.243261
8.15228	0.0411943			8.14728	0.11269			8.15062	0.206672			8.15228	0.368685			8.14875	0.0202805			8.15228	0.0277013			8.14895	0.0407547			8.15062	0.0627488			8.15187	0.0436977			8.15208	0.0580698			8.15145	0.154115			8.14895	0.244461
8.15895	0.0423342			8.15395	0.113815			8.15728	0.206128			8.15895	0.367552			8.15542	0.0207946			8.15895	0.0282079			8.15562	0.0402257			8.15728	0.0626594			8.15853	0.04448			8.15875	0.0576675			8.15812	0.15416			8.15562	0.245512
8.16562	0.0436455			8.16062	0.114568			8.16395	0.205979			8.16562	0.367053			8.16208	0.0214502			8.16562	0.028953			8.16228	0.039421			8.16395	0.0626743			8.1652	0.0450388			8.16542	0.0571162			8.16478	0.154383			8.16228	0.24616
8.17228	0.045158			8.16728	0.114858			8.17062	0.205904			8.17228	0.367388			8.16875	0.0217557			8.17228	0.0293851			8.16895	0.0387281			8.17062	0.0626147			8.17187	0.0451803			8.17208	0.0564232			8.17145	0.155143			8.16895	0.246219
8.17895	0.0468045			8.17395	0.115156			8.17728	0.205152			8.17895	0.367716			8.17542	0.0218153			8.17895	0.0290796			8.17562	0.0379905			8.17728	0.0622645			8.17853	0.0454932			8.17875	0.0563785			8.17812	0.155948			8.17562	0.245839
8.18562	0.0479594			8.18062	0.115082			8.18395	0.204593			8.18562	0.367329			8.18208	0.0215396			8.18562	0.0282153			8.18228	0.0373796			8.18395	0.061743			8.1852	0.0456572			8.18542	0.0565425			8.18478	0.157394			8.18228	0.245772
8.19228	0.0481904			8.18728	0.114426			8.19062	0.20472			8.19228	0.367008			8.18875	0.0213459			8.19228	0.0275224			8.18895	0.0372902			8.19062	0.0613406			8.19187	0.0451282			8.19208	0.0568107			8.19145	0.159219			8.18895	0.245869
8.19895	0.0477657			8.19395	0.113659			8.19728	0.204958			8.19895	0.367336			8.19542	0.0210553			8.19895	0.0269711			8.19562	0.0376254			8.19728	0.0613704			8.19853	0.0445843			8.19875	0.0571236			8.19812	0.161685			8.19562	0.246257
8.20562	0.0470728			8.20062	0.113443			8.20395	0.204787			8.20562	0.368252			8.20208	0.0207052			8.20562	0.0263304			8.20228	0.038527			8.20395	0.0617057			8.2052	0.0448376			8.20542	0.0580922			8.20478	0.164069			8.20228	0.247061
8.21228	0.0463575			8.20728	0.113927			8.21062	0.204667			8.21228	0.368997			8.20875	0.0204071			8.21228	0.0258684			8.20895	0.0397712			8.21062	0.0623837			8.21187	0.0456274			8.21208	0.0596717			8.21145	0.166118			8.20895	0.248037
8.21895	0.0452623			8.21395	0.114463			8.21728	0.205331			8.21895	0.369392			8.21542	0.0201166			8.21895	0.025712			8.21562	0.0412092			8.21728	0.0636131			8.21853	0.046052			8.21875	0.0607446			8.21812	0.167683			8.21562	0.249192
8.22562	0.0442341			8.22062	0.11497			8.22395	0.206344			8.22562	0.370011			8.22208	0.0200495			8.22562	0.0258163			8.22228	0.0422373			8.22395	0.0652075			8.2252	0.0462309			8.22542	0.0610948			8.22478	0.168502			8.22228	0.25069
8.23228	0.0436977			8.22728	0.115499			8.23062	0.206873			8.23228	0.370353			8.22875	0.0199974			8.23228	0.0257641			8.22895	0.0426024			8.23062	0.0666901			8.23187	0.0465438			8.23208	0.0608414			8.23145	0.169113			8.22895	0.253417
8.23895	0.0435412			8.23395	0.115797			8.23728	0.206873			8.23895	0.369959			8.23542	0.0200793			8.23895	0.0257641			8.23562	0.0426769			8.23728	0.0676662			8.23853	0.0470206			8.23875	0.0606254			8.23812	0.169374			8.23562	0.256829
8.24562	0.0431538			8.24062	0.115439			8.24395	0.206321			8.24562	0.368699			8.24208	0.0204444			8.24562	0.026077			8.24228	0.0425726			8.24395	0.0679418			8.2452	0.0472516			8.24542	0.0604242			8.24478	0.169158			8.24228	0.259601
8.25228	0.0423044			8.24728	0.11453			8.25062	0.205651			8.25228	0.366993			8.24875	0.0210106			8.25228	0.0268444			8.24895	0.0425279			8.25062	0.0678897			8.25187	0.0477955			8.25208	0.0600442			8.25145	0.168532			8.24895	0.261426
8.25895	0.041835			8.25395	0.113554			8.25728	0.204958			8.25895	0.365399			8.25542	0.0214502			8.25895	0.0276268			8.25562	0.0424534			8.25728	0.0674501			8.25853	0.048928			8.25875	0.0594929			8.25812	0.168353			8.25562	0.263035
8.26562	0.0421479			8.26062	0.112697			8.26395	0.204228			8.26562	0.364095			8.26208	0.0215247			8.26562	0.0281408			8.26228	0.042446			8.26395	0.0669584			8.2652	0.0503957			8.26542	0.0593737			8.26478	0.168927			8.26228	0.264816
8.27228	0.042744			8.26728	0.111789			8.27062	0.203386			8.27228	0.363789			8.26875	0.0216961			8.27228	0.0284761			8.26895	0.0426322			8.27062	0.0664592			8.27187	0.0516027			8.27208	0.0597388			8.27145	0.16968			8.26895	0.266127
8.27895	0.0430346			8.27395	0.111103			8.27728	0.20282			8.27895	0.36449			8.27542	0.0216588			8.27895	0.0286549			8.27562	0.0429377			8.27728	0.0661165			8.27853	0.0520349			8.27875	0.0603423			8.27812	0.170387			8.27562	0.267021
8.28562	0.0430718			8.28062	0.11117			8.28395	0.203192			8.28562	0.365779			8.28208	0.021182			8.28562	0.0289306			8.28228	0.043124			8.28395	0.0660121			8.2852	0.0519231			8.28542	0.0605881			8.28478	0.171274			8.28228	0.268236
8.29228	0.0432506			8.28728	0.112064			8.29062	0.204049			8.29228	0.367008			8.28875	0.0204071			8.29228	0.0289604			8.28895	0.042744			8.29062	0.0660047			8.29187	0.0515059			8.29208	0.0608414			8.29145	0.172645			8.28895	0.270031
8.29895	0.0432953			8.29395	0.11345			8.29728	0.204571			8.29895	0.368014			8.29542	0.020124			8.29895	0.0292957			8.29562	0.0418648			8.29728	0.06634			8.29853	0.0511631			8.29875	0.0615269			8.29812	0.174075			8.29562	0.27208
8.30562	0.0427216			8.30062	0.114873			8.30395	0.204541			8.30562	0.368774			8.30208	0.0203028			8.30562	0.0300184			8.30228	0.0414103			8.30395	0.0665337			8.3052	0.0507757			8.30542	0.0620335			8.30478	0.174835			8.30228	0.274293
8.31228	0.0417456			8.30728	0.115916			8.31062	0.204936			8.31228	0.368647			8.30875	0.0202134			8.31228	0.0306517			8.30895	0.0413284			8.31062	0.0665113			8.31187	0.0507012			8.31208	0.0625029			8.31145	0.174925			8.30895	0.276938
8.31895	0.0408813			8.31395	0.116497			8.31728	0.205815			8.31895	0.367954			8.31542	0.0199229			8.31895	0.0305027			8.31562	0.0412613			8.31728	0.0659972			8.31853	0.0505894			8.31875	0.0628978			8.31812	0.174738			8.31562	0.280105
8.32562	0.0405312			8.32062	0.116736			8.32395	0.206649			8.32562	0.367284			8.32208	0.0198781			8.32562	0.0292808			8.32228	0.0409931			8.32395	0.0651702			8.3252	0.0505745			8.32542	0.0636652			8.32478	0.174791			8.32228	0.283644
8.33228	0.0405312			8.32728	0.11652			8.33062	0.206932			8.33228	0.367306			8.32875	0.020422			8.33228	0.027746			8.32895	0.0407845			8.33062	0.0642687			8.33187	0.0503808			8.33208	0.064455			8.33145	0.175089			8.32895	0.287443
8.33895	0.04071			8.33395	0.115938			8.33728	0.207193			8.33895	0.367917			8.33542	0.020802			8.33895	0.0267476			8.33562	0.0410229			8.33728	0.0633076			8.33853	0.050053			8.33875	0.0649244			8.33812	0.175573			8.33562	0.290938
8.34562	0.0411421			8.34062	0.115022			8.34395	0.207692			8.34562	0.368305			8.34208	0.0208467			8.34562	0.0263378			8.34228	0.0412986			8.34395	0.062719			8.3452	0.0498593			8.34542	0.0651479			8.34478	0.176519			8.34228	0.293463
8.35228	0.0416934			8.34728	0.114202			8.35062	0.207871			8.35228	0.36896			8.34875	0.0205114			8.35228	0.0264198			8.34895	0.0416413			8.35062	0.0627413			8.35187	0.0496507			8.35208	0.0652671			8.35145	0.177771			8.34895	0.294849
8.35895	0.0420734			8.35395	0.113547			8.35728	0.207402			8.35895	0.369698			8.35542	0.0201687			8.35895	0.0268668			8.35562	0.0417978			8.35728	0.063315			8.35853	0.0497326			8.35875	0.0656545			8.35812	0.178762			8.35562	0.295363
8.36562	0.0421256			8.36062	0.1131			8.36395	0.206649			8.36562	0.370294			8.36208	0.019826			8.36562	0.0277981			8.36228	0.0417456			8.36395	0.0641495			8.3652	0.0498891			8.36542	0.0661686			8.36478	0.179388			8.36228	0.295281
8.37228	0.0419542			8.36728	0.112981			8.37062	0.20621			8.37228	0.370122			8.36875	0.0193715			8.37228	0.0293478			8.36895	0.0415295			8.37062	0.0651255			8.37187	0.050053			8.37208	0.0663251			8.37145	0.179991			8.36895	0.294834
8.37895	0.0417978			8.37395	0.112973			8.37728	0.206269			8.37895	0.3694			8.37542	0.0194684			8.37895	0.0306144			8.37562	0.0410005			8.37728	0.0663027			8.37853	0.0502318			8.37875	0.0661314			8.37812	0.181101			8.37562	0.294425
8.38562	0.0418276			8.38062	0.113301			8.38395	0.206552			8.38562	0.369139			8.38208	0.0200048			8.38562	0.0311807			8.38228	0.0405088			8.38395	0.0673756			8.3852	0.0501946			8.38542	0.0661537			8.38478	0.182472			8.38228	0.294268
8.39228	0.0421181			8.38728	0.113942			8.39062	0.206888			8.39228	0.369243			8.38875	0.0207797			8.39228	0.0310317			8.38895	0.0402853			8.39062	0.0677928			8.39187	0.0500828			8.39208	0.066191			8.39145	0.183806			8.38895	0.294253
8.39895	0.0427589			8.39395	0.114769			8.39728	0.20723			8.39895	0.369467			8.39542	0.0212193			8.39895	0.0305101			8.39562	0.040859			8.39728	0.067696			8.39853	0.0500605			8.39875	0.065729			8.39812	0.185058			8.39562	0.294663
8.40562	0.0434741			8.40062	0.115208			8.40395	0.20735			8.40562	0.369467			8.40208	0.021182			8.40562	0.0302196			8.40228	0.0420362			8.40395	0.0672862			8.4052	0.0500381			8.40542	0.0645965			8.40478	0.186034			8.40228	0.295714
8.41228	0.0440702			8.40728	0.115365			8.41062	0.20732			8.41228	0.369467			8.40875	0.0209585			8.41228	0.0300184			8.40895	0.0434667			8.41062	0.0668019			8.41187	0.0497699			8.41208	0.0638887			8.41145	0.186451			8.40895	0.29733
8.41895	0.0441521			8.41395	0.11529			8.41728	0.206985			8.41895	0.369444			8.41542	0.0204071			8.41895	0.029847			8.41562	0.0447854			8.41728	0.0662282			8.41853	0.0492632			8.41875	0.0639632			8.41812	0.186101			8.41562	0.298783
8.42562	0.0436008			8.42062	0.115089			8.42395	0.206396			8.42562	0.369474			8.42208	0.0198558			8.42562	0.0294372			8.42228	0.045605			8.42395	0.0657439			8.4252	0.0491142			8.42542	0.0646934			8.42478	0.185661			8.42228	0.300005
8.43228	0.0426993			8.42728	0.114486			8.43062	0.205681			8.43228	0.369608			8.42875	0.0196397			8.43228	0.0291839			8.42895	0.0457689			8.43062	0.0656694			8.43187	0.0494197			8.43208	0.065729			8.43145	0.185803			8.42895	0.301197
8.43895	0.0419393			8.43395	0.113927			8.43728	0.205114			8.43895	0.370093			8.43542	0.0198781			8.43895	0.0294372			8.43562	0.0454038			8.43728	0.0660568			8.43853	0.0496134			8.43875	0.0668913			8.43812	0.186704			8.43562	0.302173
8.44562	0.0413954			8.44062	0.113688			8.44395	0.204816			8.44562	0.371106			8.44208	0.0205711			8.44562	0.0294745			8.44228	0.0445768			8.44395	0.0669658			8.4452	0.0495315			8.44542	0.0676513			8.44478	0.188135			8.44228	0.302874
8.45228	0.0410303			8.44728	0.113644			8.45062	0.204854			8.45228	0.37241			8.44875	0.0212789			8.45228	0.0288561			8.44895	0.04334			8.45062	0.0678673			8.45187	0.0497773			8.45208	0.0676364			8.45145	0.189722			8.44895	0.303313
8.45895	0.04109			8.45395	0.113979			8.45728	0.205457			8.45895	0.373974			8.45542	0.0216365			8.45895	0.0281334			8.45562	0.0423342			8.45728	0.0685602			8.45853	0.0503287			8.45875	0.0670925			8.45812	0.191204			8.45562	0.30411
8.46562	0.0416413			8.46062	0.114821			8.46395	0.206739			8.46562	0.375398			8.46208	0.0218451			8.46562	0.0281855			8.46228	0.0418872			8.46395	0.0689924			8.4652	0.0506267			8.46542	0.0664145			8.46478	0.192091			8.46228	0.305139
8.47228	0.0423267			8.46728	0.116251			8.47062	0.208393			8.47228	0.376604			8.46875	0.022091			8.47228	0.0286251			8.46895	0.0424162			8.47062	0.0693053			8.47187	0.0506714			8.47208	0.0656992			8.47145	0.191964			8.46895	0.3061
8.47895	0.0428036			8.47395	0.117391			8.47728	0.209704			8.47895	0.377551			8.47542	0.0223741			8.47895	0.0290051			8.47562	0.0433996			8.47728	0.0697598			8.47853	0.0509843			8.47875	0.0647828			8.47812	0.191145			8.47562	0.306956
8.48562	0.0430793			8.48062	0.118084			8.48395	0.210814			8.48562	0.378311			8.48208	0.0222772			8.48562	0.0294074			8.48228	0.0446439			8.48395	0.070326			8.4852	0.0516996			8.48542	0.0642464			8.48478	0.18996			8.48228	0.307649
8.49228	0.0430048			8.48728	0.118427			8.49062	0.211686			8.49228	0.379033			8.48875	0.0221059			8.49228	0.0300705			8.48895	0.0458434			8.49062	0.0709817			8.49187	0.0519305			8.49208	0.064306			8.49145	0.18876			8.48895	0.30829
8.49895	0.0427589			8.49395	0.1183			8.49728	0.212111			8.49895	0.379451			8.49542	0.0223666			8.49895	0.0303984			8.49562	0.046663			8.49728	0.0715479			8.49853	0.051789			8.49875	0.0647679			8.49812	0.187613			8.49562	0.308573
8.50562	0.0424758			8.50062	0.117458			8.50395	0.212297			8.50562	0.379466			8.50208	0.0224859			8.50562	0.0300929			8.50228	0.0469089			8.50395	0.0718385			8.5052	0.0517517			8.50542	0.0650361			8.50478	0.186451			8.50228	0.308603
8.51228	0.0423715			8.50728	0.116326			8.51062	0.212565			8.51228	0.379071			8.50875	0.0221357			8.51228	0.0295714			8.50895	0.0465363			8.51062	0.072211			8.51187	0.05202			8.51208	0.0651777			8.51145	0.185519			8.50895	0.308692
8.51895	0.0420809			8.51395	0.115827			8.51728	0.213094			8.51895	0.378609			8.51542	0.0217482			8.51895	0.0292063			8.51562	0.0459999			8.51728	0.07236			8.51853	0.0521168			8.51875	0.0658035			8.51812	0.185058			8.51562	0.309169
8.52562	0.0418499			8.52062	0.116006			8.52395	0.213288			8.52562	0.37846			8.52208	0.0218824			8.52562	0.0292361			8.52228	0.0457764			8.52395	0.0720248			8.5252	0.051938			8.52542	0.0666678			8.52478	0.184886			8.52228	0.309899
8.53228	0.0421256			8.52728	0.116467			8.53062	0.213198			8.53228	0.379033			8.52875	0.0222549			8.53228	0.0297055			8.52895	0.0457615			8.53062	0.0711679			8.53187	0.0519156			8.53208	0.0671893			8.53145	0.184722			8.52895	0.310399
8.53895	0.042446			8.53395	0.117108			8.53728	0.213109			8.53895	0.380039			8.53542	0.0222847			8.53895	0.030674			8.53562	0.0457466			8.53728	0.0701696			8.53853	0.0520796			8.53875	0.0673458			8.53812	0.184327			8.53562	0.310481
8.54562	0.0427514			8.54062	0.118084			8.54395	0.21296			8.54562	0.381231			8.54208	0.0226423			8.54562	0.0317767			8.54228	0.0455827			8.54395	0.0697523			8.5452	0.0524148			8.54542	0.0677556			8.54478	0.184163			8.54228	0.310168
8.55228	0.0429675			8.54728	0.118919			8.55062	0.212468			8.55228	0.382289			8.54875	0.0235066			8.55228	0.0326261			8.54895	0.0452623			8.55062	0.0698864			8.55187	0.0523701			8.55208	0.0685826			8.55145	0.184536			8.54895	0.309505
8.55895	0.0435784			8.55395	0.119112			8.55728	0.212096			8.55895	0.383191			8.55542	0.0243261			8.55895	0.0331104			8.55562	0.0446737			8.55728	0.0703633			8.55853	0.05202			8.55875	0.0690967			8.55812	0.184983			8.55562	0.308268
8.56562	0.0441745			8.56062	0.118531			8.56395	0.212267			8.56562	0.383839			8.56208	0.0244305			8.56562	0.0331625			8.56228	0.0436679			8.56395	0.0710264			8.5652	0.0511631			8.56542	0.0690594			8.56478	0.185244			8.56228	0.306793
8.57228	0.0444651			8.56728	0.117533			8.57062	0.213005			8.57228	0.384085			8.56875	0.0237226			8.57228	0.0328124			8.56895	0.0427812			8.57062	0.0720993			8.57187	0.0503436			8.57208	0.0688806			8.57145	0.185199			8.56895	0.305638
8.57895	0.0447556			8.57395	0.116497			8.57728	0.213765			8.57895	0.384308			8.57542	0.0227615			8.57895	0.0319704			8.57562	0.0424311			8.57728	0.0734031			8.57853	0.049673			8.57875	0.0689402			8.57812	0.184961			8.57562	0.305332
8.58562	0.0448152			8.58062	0.115737			8.58395	0.214539			8.58562	0.384673			8.58208	0.0214502			8.58562	0.0311583			8.58228	0.0426173			8.58395	0.0744686			8.5852	0.0489131			8.58542	0.0689775			8.58478	0.184722			8.58228	0.305884
8.59228	0.0446141			8.58728	0.115566			8.59062	0.215486			8.59228	0.385575			8.58875	0.0201836			8.59228	0.0306442			8.58895	0.0431761			8.59062	0.0750497			8.59187	0.0482947			8.59208	0.0688359			8.59145	0.184163			8.58895	0.307024
8.59895	0.0440776			8.59395	0.115998			8.59728	0.216477			8.59895	0.386611			8.59542	0.0194907			8.59895	0.0305474			8.59562	0.0438169			8.59728	0.0754818			8.59853	0.0482425			8.59875	0.0686049			8.59812	0.183254			8.59562	0.308454
8.60562	0.0438243			8.60062	0.117093			8.60395	0.216924			8.60562	0.387244			8.60208	0.019595			8.60562	0.0307336			8.60228	0.0445843			8.60395	0.0757128			8.6052	0.0488758			8.60542	0.0682846			8.60478	0.182264			8.60228	0.309549
8.61228	0.0438467			8.60728	0.118598			8.61062	0.216417			8.61228	0.387415			8.60875	0.0201762			8.61228	0.0309497			8.60895	0.0452399			8.61062	0.0755116			8.61187	0.0492036			8.61208	0.0677183			8.61145	0.181764			8.60895	0.309728
8.61895	0.0438765			8.61395	0.119865			8.61728	0.215575			8.61895	0.387453			8.61542	0.0209063			8.61895	0.0316054			8.61562	0.0457168			8.61728	0.0750944			8.61853	0.049144			8.61875	0.0668615			8.61812	0.181898			8.61562	0.30908
8.62562	0.044249			8.62062	0.120707			8.62395	0.214607			8.62562	0.387721			8.62208	0.0216588			8.62562	0.0324398			8.62228	0.045836			8.62395	0.0749379			8.6252	0.0489131			8.62542	0.0661016			8.62478	0.1821			8.62228	0.307992
8.63228	0.0447929			8.62728	0.121415			8.63062	0.213809			8.63228	0.387952			8.62875	0.0220612			8.63228	0.0332296			8.62895	0.0454858			8.63062	0.0752956			8.63187	0.0490025			8.63208	0.065662			8.63145	0.18245			8.62895	0.306815
8.63895	0.0452101			8.63395	0.122055			8.63728	0.212908			8.63895	0.388168			8.63542	0.0218973			8.63895	0.0335723			8.63562	0.0453517			8.63728	0.0760183			8.63853	0.0490919			8.63875	0.0655428			8.63812	0.183016			8.63562	0.3056
8.64562	0.0452176			8.64062	0.122383			8.64395	0.212401			8.64562	0.388861			8.64208	0.0213012			8.64562	0.0334382			8.64228	0.045687			8.64395	0.0772178			8.6452	0.0493079			8.64542	0.0660121			8.64478	0.183783			8.64228	0.304691
8.65228	0.0449419			8.64728	0.122271			8.65062	0.212573			8.65228	0.389926			8.64875	0.0210181			8.65228	0.0330433			8.64895	0.0462905			8.65062	0.0787675			8.65187	0.0500306			8.65208	0.0670478			8.65145	0.184476			8.64895	0.30452
8.65895	0.0449792			8.65395	0.122331			8.65728	0.213102			8.65895	0.390939			8.65542	0.0211969			8.65895	0.0323802			8.65562	0.0465959			8.65728	0.0803247			8.65853	0.0507012			8.65875	0.0681952			8.65812	0.185296			8.65562	0.304945
8.66562	0.0450239			8.66062	0.12254			8.66395	0.213623			8.66562	0.391684			8.66208	0.0217035			8.66562	0.031434			8.66228	0.0469089			8.66395	0.0813901			8.6652	0.0508651			8.66542	0.0688583			8.66478	0.186153			8.66228	0.305429
8.67228	0.0453666			8.66728	0.122428			8.67062	0.21366			8.67228	0.392132			8.66875	0.0223964			8.67228	0.0305176			8.66895	0.0476167			8.67062	0.0816956			8.67187	0.0503585			8.67208	0.06897			8.67145	0.186421			8.66895	0.306197
8.67895	0.0459105			8.67395	0.121824			8.67728	0.213556			8.67895	0.39237			8.67542	0.0226721			8.67895	0.0297427			8.67562	0.0481457			8.67728	0.0815913			8.67853	0.0497922			8.67875	0.069119			8.67812	0.186212			8.67562	0.307582
8.68562	0.0463575			8.68062	0.121199			8.68395	0.213534			8.68562	0.392273			8.68208	0.0225827			8.68562	0.0292361			8.68228	0.047937			8.68395	0.081338			8.6852	0.0493824			8.68542	0.0693798			8.68478	0.186019			8.68228	0.309817
8.69228	0.0467151			8.68728	0.121027			8.69062	0.213802			8.69228	0.39234			8.68875	0.0221208			8.69228	0.0289828			8.68895	0.0475124			8.69062	0.0813827			8.69187	0.0491738			8.69208	0.0693202			8.69145	0.186086			8.68895	0.3125
8.69895	0.0469089			8.69395	0.12137			8.69728	0.21404			8.69895	0.392996			8.69542	0.0213757			8.69895	0.0293925			8.69562	0.0474751			8.69728	0.0820979			8.69853	0.0490397			8.69875	0.0687391			8.69812	0.186346			8.69562	0.314966
8.70562	0.0470281			8.70062	0.121824			8.70395	0.214025			8.70562	0.393599			8.70208	0.0203699			8.70562	0.0305548			8.70228	0.0480935			8.70395	0.0835508			8.7052	0.0491887			8.70542	0.0675917			8.70478	0.187024			8.70228	0.317819
8.71228	0.0466928			8.70728	0.122048			8.71062	0.214167			8.71228	0.393979			8.70875	0.0190958			8.71228	0.0314713			8.70895	0.0489131			8.71062	0.0852719			8.71187	0.0493079			8.71208	0.0663474			8.71145	0.188395			8.70895	0.320882
8.71895	0.0463575			8.71395	0.122003			8.71728	0.214867			8.71895	0.393935			8.71542	0.0184029			8.71895	0.0315756			8.71562	0.0497699			8.71728	0.0867397			8.71853	0.0493005			8.71875	0.0652298			8.71812	0.190161			8.71562	0.323907
8.72562	0.0466481			8.72062	0.12178			8.72395	0.215709			8.72562	0.393942			8.72208	0.0186116			8.72562	0.0314638			8.72228	0.0506118			8.72395	0.0882223			8.7252	0.0490993			8.72542	0.0644028			8.72478	0.191815			8.72228	0.326343
8.73228	0.0474229			8.72728	0.121526			8.73062	0.216387			8.73228	0.393853			8.72875	0.019446			8.73228	0.0316724			8.72895	0.0514612			8.73062	0.0901222			8.73187	0.0488758			8.73208	0.0643581			8.73145	0.193313			8.72895	0.328816
8.73895	0.0481606			8.73395	0.120923			8.73728	0.217043			8.73895	0.393741			8.73542	0.0206754			8.73895	0.0319853			8.73562	0.0522584			8.73728	0.0919476			8.73853	0.0489652			8.73875	0.0653788			8.73812	0.195064			8.73562	0.332765
8.74562	0.0485405			8.74062	0.11991			8.74395	0.21819			8.74562	0.394076			8.74208	0.0217631			8.74562	0.0318363			8.74228	0.0525862			8.74395	0.0933409			8.7452	0.0493154			8.74542	0.067316			8.74478	0.197127			8.74228	0.338048
8.75228	0.0483096			8.74728	0.1188			8.75062	0.219241			8.75228	0.394814			8.74875	0.0228733			8.75228	0.0319555			8.74895	0.0522807			8.75062	0.0947267			8.75187	0.0497922			8.75208	0.0694916			8.75145	0.199519			8.74895	0.3438
8.75895	0.0474378			8.75395	0.117987			8.75728	0.219665			8.75895	0.395894			8.75542	0.0237077			8.75895	0.0327528			8.75562	0.0517443			8.75728	0.0965223			8.75853	0.0503212			8.75875	0.0715032			8.75812	0.201941			8.75562	0.349768
8.76562	0.0461116			8.76062	0.117674			8.76395	0.219703			8.76562	0.396878			8.76208	0.0239313			8.76562	0.033617			8.76228	0.0518486			8.76395	0.09837			8.7652	0.0507906			8.76542	0.0731945			8.76478	0.204608			8.76228	0.356726
8.77228	0.0453815			8.76728	0.117511			8.77062	0.219502			8.77228	0.397809			8.76875	0.0237226			8.77228	0.0339299			8.76895	0.052467			8.77062	0.0995845			8.77187	0.0510663			8.77208	0.0743866			8.77145	0.207886			8.76895	0.364698
8.77895	0.0454411			8.77395	0.117488			8.77728	0.219308			8.77895	0.398427			8.77542	0.0229329			8.77895	0.0335798			8.77562	0.053294			8.77728	0.100769			8.77853	0.0511184			8.77875	0.0748709			8.77812	0.211246			8.77562	0.373133
8.78562	0.0458956			8.78062	0.117555			8.78395	0.218891			8.78562	0.398658			8.78208	0.0220984			8.78562	0.0333488			8.78228	0.0541881			8.78395	0.102296			8.7852	0.0511184			8.78542	0.0751466			8.78478	0.214495			8.78228	0.381961
8.79228	0.0467226			8.78728	0.117935			8.79062	0.218727			8.79228	0.39883			8.78875	0.0214353			8.79228	0.0332445			8.78895	0.0553355			8.79062	0.104755			8.79187	0.0514761			8.79208	0.0755191			8.79145	0.217818			8.78895	0.392273
8.79895	0.047721			8.79395	0.118211			8.79728	0.218548			8.79895	0.399366			8.79542	0.0211447			8.79895	0.0332743			8.79562	0.0568107			8.79728	0.107653			8.79853	0.0518188			8.79875	0.0757799			8.79812	0.221729			8.79562	0.40441
8.80562	0.048548			8.80062	0.117905			8.80395	0.218235			8.80562	0.400446			8.80208	0.0214055			8.80562	0.0334084			8.80228	0.0579134			8.80395	0.110514			8.8052	0.052169			8.80542	0.0760332			8.80478	0.226259			8.80228	0.41768
8.81228	0.0483319			8.80728	0.116847			8.81062	0.217728			8.81228	0.401534			8.80875	0.0214651			8.81228	0.0335276			8.80895	0.058569			8.81062	0.112891			8.81187	0.052467			8.81208	0.0766739			8.81145	0.23149			8.80895	0.431791
8.81895	0.0474006			8.81395	0.11567			8.81728	0.217229			8.81895	0.402533			8.81542	0.0215918			8.81895	0.0335425			8.81562	0.0591278			8.81728	0.114679			8.81853	0.0529587			8.81875	0.0782385			8.81812	0.237994			8.81562	0.446841
8.82562	0.0466481			8.82062	0.115216			8.82395	0.216931			8.82562	0.403598			8.82208	0.021711			8.82562	0.0330061			8.82228	0.0598803			8.82395	0.116296			8.8252	0.0534654			8.82542	0.0803769			8.82478	0.245742			8.82228	0.463404
8.83228	0.0459924			8.82728	0.115544			8.83062	0.216618			8.83228	0.405021			8.82875	0.0218302			8.83228	0.0323132			8.82895	0.0604913			8.83062	0.117309			8.83187	0.0539273			8.83208	0.0827685			8.83145	0.254206			8.82895	0.481345
8.83895	0.0451654			8.83395	0.116408			8.83728	0.216626			8.83895	0.406489			8.83542	0.022009			8.83895	0.0316277			8.83562	0.060305			8.83728	0.117883			8.83853	0.0545457			8.83875	0.0852868			8.83812	0.263229			8.83562	0.501007
8.84562	0.0439808			8.84062	0.11728			8.84395	0.216953			8.84562	0.407696			8.84208	0.022158			8.84562	0.0309721			8.84228	0.0597164			8.84395	0.118338			8.8452	0.0552386			8.84542	0.0879765			8.84478	0.273064			8.84228	0.523031
8.85228	0.0431463			8.84728	0.118047			8.85062	0.217557			8.85228	0.408597			8.84875	0.0229701			8.85228	0.0304654			8.84895	0.0593588			8.85062	0.119373			8.85187	0.056155			8.85208	0.0910237			8.85145	0.283584			8.84895	0.547931
8.85895	0.0424609			8.85395	0.118457			8.85728	0.217967			8.85895	0.409342			8.85542	0.0238717			8.85895	0.0301525			8.85562	0.0591055			8.85728	0.121206			8.85853	0.0571683			8.85875	0.0941828			8.85812	0.294492			8.85562	0.575766
8.86562	0.0413954			8.86062	0.118457			8.86395	0.218131			8.86562	0.409909			8.86208	0.0245199			8.86562	0.0303835			8.86228	0.0588372			8.86395	0.123307			8.8652	0.0586733			8.86542	0.0975728			8.86478	0.306062			8.86228	0.605941
8.87228	0.0405982			8.86728	0.118159			8.87062	0.218354			8.87228	0.410177			8.86875	0.0243559			8.87228	0.0307783			8.86895	0.0588968			8.87062	0.125378			8.87187	0.0602603			8.87208	0.101238			8.87145	0.318795			8.86895	0.638857
8.87895	0.04071			8.87395	0.117823			8.87728	0.218727			8.87895	0.410497			8.87542	0.0232831			8.87895	0.0312477			8.87562	0.0598729			8.87728	0.127517			8.87853	0.0615641			8.87875	0.105448			8.87812	0.332966			8.87562	0.674754
8.88562	0.0418052			8.88062	0.117891			8.88395	0.219211			8.88562	0.410989			8.88208	0.0220239			8.88562	0.031516			8.88228	0.0613108			8.88395	0.130191			8.8852	0.0628382			8.88542	0.110231			8.88478	0.348359			8.88228	0.713885
8.89228	0.0428706			8.88728	0.118658			8.89062	0.219703			8.89228	0.411674			8.88875	0.0208318			8.89228	0.0314936			8.88895	0.0626743			8.89062	0.133216			8.89187	0.0643656			8.89208	0.115141			8.89145	0.364706			8.88895	0.756495
8.89895	0.0438914			8.89395	0.120156			8.89728	0.220403			8.89895	0.412248			8.89542	0.0202283			8.89895	0.031136			8.89562	0.0642538			8.89728	0.135913			8.89853	0.0662953			8.89875	0.120193			8.89812	0.382312			8.89562	0.802867
8.90562	0.0451431			8.90062	0.121623			8.90395	0.220992			8.90562	0.412859			8.90208	0.0199974			8.90562	0.0308231			8.90228	0.0660345			8.90395	0.13797			8.9052	0.0677183			8.90542	0.125363			8.90478	0.401407			8.90228	0.853963
8.91228	0.0461042			8.90728	0.122242			8.91062	0.22094			8.91228	0.413835			8.90875	0.0201538			8.91228	0.0309497			8.90895	0.0676662			8.91062	0.139691			8.91187	0.0687242			8.91208	0.130795			8.91145	0.422299			8.90895	0.909835
8.91895	0.0463575			8.91395	0.122041			8.91728	0.220172			8.91895	0.4149			8.91542	0.0208169			8.91895	0.0314936			8.91562	0.0687465			8.91728	0.1413			8.91853	0.0699013			8.91875	0.136696			8.91812	0.445038			8.91562	0.971094
8.92562	0.0462607			8.92062	0.121348			8.92395	0.219464			8.92562	0.415795			8.92208	0.0216141			8.92562	0.0322983			8.92228	0.0694692			8.92395	0.142828			8.9252	0.071466			8.92542	0.142902			8.92478	0.469945			8.92228	1.03843
8.93228	0.046283			8.92728	0.120535			8.93062	0.219248			8.93228	0.416704			8.92875	0.0224039			8.93228	0.0328869			8.92895	0.0701621			8.93062	0.144191			8.93187	0.0731349			8.93208	0.149377			8.93145	0.497572			8.92895	1.11209
8.93895	0.0459701			8.93395	0.119247			8.93728	0.219107			8.93895	0.417881			8.93542	0.0230074			8.93895	0.0332668			8.93562	0.0705123			8.93728	0.145786			8.93853	0.0745133			8.93875	0.15647			8.93812	0.527583			8.93562	1.19232
8.94562	0.0450909			8.94062	0.117831			8.94395	0.219032			8.94562	0.41917			8.94208	0.023596			8.94562	0.0331774			8.94228	0.0706315			8.94395	0.147551			8.9452	0.0760928			8.94542	0.164591			8.94478	0.560403			8.94228	1.27949
8.95228	0.044331			8.94728	0.116982			8.95062	0.219464			8.95228	0.420116			8.94875	0.0239685			8.95228	0.0327677			8.94895	0.0708699			8.95062	0.149362			8.95187	0.0783652			8.95208	0.173882			8.95145	0.596143			8.94895	1.37458
8.95895	0.0441372			8.95395	0.116795			8.95728	0.220455			8.95895	0.420801			8.95542	0.0237897			8.95895	0.0324324			8.95562	0.0714138			8.95728	0.150643			8.95853	0.0816956			8.95875	0.183761			8.95812	0.634983			8.95562	1.47787
8.96562	0.043951			8.96062	0.117004			8.96395	0.22126			8.96562	0.421353			8.96208	0.0228584			8.96562	0.0321716			8.96228	0.0721961			8.96395	0.151105			8.9652	0.0856891			8.96542	0.194065			8.96478	0.676639			8.96228	1.58932
8.97228	0.043653			8.96728	0.117198			8.97062	0.221573			8.97228	0.421688			8.96875	0.0213161			8.97228	0.0323132			8.96895	0.0728294			8.97062	0.151135			8.97187	0.0895187			8.97208	0.205152			8.97145	0.720941			8.96895	1.71004
8.97895	0.0436828			8.97395	0.117496			8.97728	0.221655			8.97895	0.422113			8.97542	0.0197813			8.97895	0.0325665			8.97562	0.0732467			8.97728	0.150971			8.97853	0.0932366			8.97875	0.217088			8.97812	0.768356			8.97562	1.84106
8.98562	0.044331			8.98062	0.117965			8.98395	0.221707			8.98562	0.422835			8.98208	0.0186339			8.98562	0.0328422			8.98228	0.0732169			8.98395	0.151373			8.9852	0.0971928			8.98542	0.229947			8.98478	0.818849			8.98228	1.98301
8.99228	0.0451207			8.98728	0.11865			8.99062	0.221714			8.99228	0.423945			8.98875	0.0182688			8.99228	0.0330359			8.98895	0.0728667			8.99062	0.152305			8.99187	0.101753			8.99208	0.243612			8.99145	0.872865			8.98895	2.13596
8.99895	0.0455528			8.99395	0.119574			8.99728	0.221752			8.99895	0.425324			8.99542	0.0182539			8.99895	0.0332445			8.99562	0.072524			8.99728	0.153966			8.99853	0.106327			8.99875	0.258431			8.99812	0.930749			8.99562	2.30003
9.00562	0.0455678			9.00062	0.120409			9.00395	0.222027			9.00562	0.427142			9.00208	0.0190064			9.00562	0.0337139			9.00228	0.0724792			9.00395	0.155888			9.0052	0.110924			9.00542	0.274338			9.00478	0.993088			9.00228	2.4763
9.01228	0.0449866			9.00728	0.121124			9.01062	0.222407			9.01228	0.42937			9.00875	0.0204742			9.01228	0.0344813			9.00895	0.0728667			9.01062	0.15749			9.01187	0.115752			9.01208	0.290938			9.01145	1.06005			9.00895	2.66489
9.01895	0.0440404			9.01395	0.121526			9.01728	0.222802			9.01895	0.431389			9.01542	0.0220984			9.01895	0.0353605			9.01562	0.0737309			9.01728	0.158317			9.01853	0.120886			9.01875	0.308007			9.01812	1.13155			9.01562	2.86635
9.02562	0.0431538			9.02062	0.121482			9.02395	0.223279			9.02562	0.433058			9.02208	0.0234246			9.02562	0.0363141			9.02228	0.0748858			9.02395	0.158161			9.0252	0.126056			9.02542	0.325702			9.02478	1.20734			9.02228	3.08123
9.03228	0.0428408			9.02728	0.120945			9.03062	0.223733			9.03228	0.434563			9.02875	0.0244007			9.03228	0.0370294			9.02895	0.0759363			9.03062	0.157431			9.03187	0.131056			9.03208	0.344232			9.03145	1.28734			9.02895	3.31043
9.03895	0.0431314			9.03395	0.120245			9.03728	0.224344			9.03895	0.436142			9.03542	0.0252649			9.03895	0.0372157			9.03562	0.0766143			9.03728	0.156231			9.03853	0.13601			9.03875	0.363603			9.03812	1.37198			9.03562	3.55484
9.04562	0.0437722			9.04062	0.119895			9.04395	0.225127			9.04562	0.437677			9.04208	0.0252202			9.04562	0.0370443			9.04228	0.0770614			9.04395	0.154696			9.0452	0.141144			9.04542	0.383981			9.04478	1.46181			9.04228	3.81442
9.05228	0.044331			9.04728	0.119664			9.05062	0.226349			9.05228	0.439383			9.04875	0.0239685			9.05228	0.036262			9.04895	0.0771731			9.05062	0.153162			9.05187	0.14706			9.05208	0.406034			9.05145	1.55688			9.04895	4.08925
9.05895	0.0448301			9.05395	0.119649			9.05728	0.228032			9.05895	0.441246			9.05542	0.0223741			9.05895	0.0350848			9.05562	0.0768006			9.05728	0.152104			9.05853	0.153959			9.05875	0.429541			9.05812	1.65732			9.05562	4.37924
9.06562	0.0449643			9.06062	0.1202			9.06395	0.229523			9.06562	0.443071			9.06208	0.0214577			9.06562	0.0336543			9.06228	0.0762492			9.06395	0.1515			9.0652	0.161827			9.06542	0.454217			9.06478	1.76335			9.06228	4.68367
9.07228	0.0448674			9.06728	0.121079			9.07062	0.230692			9.07228	0.444442			9.06875	0.0213757			9.07228	0.0325367			9.06895	0.0760034			9.07062	0.150852			9.07187	0.169925			9.07208	0.479884			9.07145	1.87498			9.06895	5.00203
9.07895	0.0445396			9.07395	0.121877			9.07728	0.231564			9.07895	0.445515			9.07542	0.0217333			9.07895	0.0321195			9.07562	0.0760853			9.07728	0.150077			9.07853	0.177771			9.07875	0.506766			9.07812	1.99152			9.07562	5.33437
9.08562	0.0444055			9.08062	0.12219			9.08395	0.232235			9.08562	0.446528			9.08208	0.0224039			9.08562	0.0324845			9.08228	0.0761002			9.08395	0.149645			9.0852	0.185028			9.08542	0.534914			9.08478	2.11202			9.08228	5.68113
9.09228	0.0448525			9.08728	0.122689			9.09062	0.232317			9.09228	0.447303			9.08875	0.0233129			9.09228	0.0338852			9.08895	0.0761226			9.09062	0.149891			9.09187	0.191711			9.09208	0.563912			9.09145	2.23681			9.08895	6.04193
9.09895	0.0455007			9.09395	0.1233			9.09728	0.232011			9.09895	0.448361			9.09542	0.0239685			9.09895	0.0361204			9.09562	0.0763014			9.09728	0.150315			9.09853	0.198252			9.09875	0.594206			9.09812	2.36672			9.09562	6.41602
9.10562	0.0462979			9.10062	0.123344			9.10395	0.232071			9.10562	0.449769			9.10208	0.0238121			9.10562	0.0383258			9.10228	0.0764728			9.10395	0.150129			9.1052	0.205077			9.10542	0.62564			9.10478	2.50233			9.10228	6.80339
9.11228	0.0466183			9.10728	0.123173			9.11062	0.232808			9.11228	0.451751			9.10875	0.0228584			9.11228	0.0397786			9.10895	0.0764728			9.11062	0.149161			9.11187	0.212744			9.11208	0.657834			9.11145	2.64351			9.10895	7.20391
9.11895	0.0467375			9.11395	0.123255			9.11728	0.233546			9.11895	0.453971			9.11542	0.0220314			9.11895	0.0402331			9.11562	0.0762641			9.11728	0.147969			9.11853	0.221252			9.11875	0.690386			9.11812	2.7899			9.11562	7.61618
9.12562	0.0467151			9.12062	0.124156			9.12395	0.234127			9.12562	0.456043			9.12208	0.021562			9.12562	0.039883			9.12228	0.0760257			9.12395	0.146955			9.1252	0.230387			9.12542	0.723638			9.12478	2.94175			9.12228	8.03868
9.13228	0.0466555			9.12728	0.124902			9.13062	0.234723			9.13228	0.457756			9.12875	0.0214502			9.13228	0.0389591			9.12895	0.0756383			9.13062	0.14551			9.13187	0.239924			9.13208	0.758119			9.13145	3.09937			9.12895	8.4709
9.13895	0.0467077			9.13395	0.125505			9.13728	0.235245			9.13895	0.458598			9.13542	0.0212267			9.13895	0.0379011			9.13562	0.0751913			9.13728	0.143632			9.13853	0.249185			9.13875	0.793733			9.13812	3.26207			9.13562	8.91226
9.14562	0.0466481			9.14062	0.12631			9.14395	0.235632			9.14562	0.458524			9.14208	0.0212789			9.14562	0.0372157			9.14228	0.0749975			9.14395	0.142142			9.1452	0.257961			9.14542	0.830501			9.14478	3.42921			9.14228	9.36167
9.15228	0.0465289			9.14728	0.127219			9.15062	0.235647			9.15228	0.457607			9.14875	0.0219494			9.15228	0.0369251			9.14895	0.0749752			9.15062	0.141993			9.15187	0.266261			9.15208	0.868507			9.15145	3.60005			9.14895	9.8177
9.15895	0.0461563			9.15395	0.127666			9.15728	0.235409			9.15895	0.456221			9.15542	0.0225827			9.15895	0.0367388			9.15562	0.0748709			9.15728	0.142895			9.15853	0.274919			9.15875	0.907548			9.15812	3.7751			9.15562	10.2798
9.16562	0.0455901			9.16062	0.12745			9.16395	0.235029			9.16562	0.454642			9.16208	0.0231639			9.16562	0.0365227			9.16228	0.0745505			9.16395	0.143953			9.1652	0.28415			9.16542	0.947252			9.16478	3.95429			9.16228	10.7471
9.17228	0.0456199			9.16728	0.127092			9.17062	0.234947			9.17228	0.45348			9.16875	0.0236034			9.17228	0.0363439			9.16895	0.0741407			9.17062	0.145003			9.17187	0.293769			9.17208	0.987321			9.17145	4.13656			9.16895	11.2182
9.17895	0.0460371			9.17395	0.126772			9.17728	0.235543			9.17895	0.453159			9.17542	0.0242889			9.17895	0.0361726			9.17562	0.073567			9.17728	0.146173			9.17853	0.30376			9.17875	1.02798			9.17812	4.32133			9.17562	11.6911
9.18562	0.0465959			9.18062	0.126109			9.18395	0.236563			9.18562	0.453629			9.18208	0.0249371			9.18562	0.0360608			9.18228	0.0728145			9.18395	0.147656			9.1852	0.313722			9.18542	1.069			9.18478	4.50806			9.18228	12.1644
9.19228	0.0470206			9.18728	0.125296			9.19062	0.237741			9.19228	0.45424			9.18875	0.0248253			9.19228	0.0359789			9.18895	0.0718534			9.19062	0.148766			9.19187	0.323184			9.19208	1.11029			9.19145	4.69725			9.18895	12.6371
9.19895	0.0475124			9.19395	0.124887			9.19728	0.239268			9.19895	0.454605			9.19542	0.024274			9.19895	0.0362843			9.19562	0.0710413			9.19728	0.149086			9.19853	0.331976			9.19875	1.15225			9.19812	4.88897			9.19562	13.1078
9.20562	0.0480637			9.20062	0.12479			9.20395	0.240825			9.20562	0.454858			9.20208	0.023596			9.20562	0.0371858			9.20228	0.0702888			9.20395	0.148647			9.2052	0.340357			9.20542	1.19511			9.20478	5.08303			9.20228	13.5748
9.21228	0.0481457			9.20728	0.124879			9.21062	0.241935			9.21228	0.45491			9.20875	0.0235215			9.21228	0.0385419			9.20895	0.0701025			9.21062	0.14779			9.21187	0.348501			9.21208	1.23826			9.21145	5.27931			9.20895	14.0372
9.21895	0.0480413			9.21395	0.124879			9.21728	0.242144			9.21895	0.45462			9.21542	0.0236779			9.21895	0.0400096			9.21562	0.0706762			9.21728	0.147			9.21853	0.356495			9.21875	1.28101			9.21812	5.47721			9.21562	14.4942
9.22562	0.0478774			9.22062	0.125103			9.22395	0.241756			9.22562	0.453949			9.22208	0.0237897			9.22562	0.041008			9.22228	0.071317			9.22395	0.146091			9.2252	0.364743			9.22542	1.32371			9.22478	5.67624			9.22228	14.945
9.23228	0.0476465			9.22728	0.125401			9.23062	0.240937			9.23228	0.45339			9.22875	0.0241324			9.23228	0.0413135			9.22895	0.0717789			9.23062	0.145309			9.23187	0.373811			9.23208	1.36717			9.23145	5.87594			9.22895	15.3882
9.23895	0.0473112			9.23395	0.125349			9.23728	0.239775			9.23895	0.452727			9.23542	0.0249371			9.23895	0.0408888			9.23562	0.0721812			9.23728	0.144944			9.23853	0.383064			9.23875	1.41155			9.23812	6.07573			9.23562	15.8229
9.24562	0.047341			9.24062	0.125162			9.24395	0.238694			9.24562	0.451632			9.24208	0.0257939			9.24562	0.0398904			9.24228	0.0730529			9.24395	0.145145			9.2452	0.392079			9.24542	1.45657			9.24478	6.2753			9.24228	16.2484
9.25228	0.0476986			9.24728	0.12546			9.25062	0.237793			9.25228	0.450417			9.24875	0.0258908			9.25228	0.0386164			9.24895	0.0738427			9.25062	0.145666			9.25187	0.401244			9.25208	1.50211			9.25145	6.47432			9.24895	16.664
9.25895	0.0478551			9.25395	0.126302			9.25728	0.236735			9.25895	0.44968			9.25542	0.0254884			9.25895	0.0372157			9.25562	0.0741854			9.25728	0.146247			9.25853	0.411049			9.25875	1.54798			9.25812	6.67232			9.25562	17.0683
9.26562	0.0477955			9.26062	0.127196			9.26395	0.235401			9.26562	0.449508			9.26208	0.0249743			9.26562	0.0361353			9.26228	0.074558			9.26395	0.14703			9.2652	0.421181			9.26542	1.59403			9.26478	6.86891			9.26228	17.4607
9.27228	0.0480562			9.26728	0.127815			9.27062	0.234194			9.27228	0.449151			9.26875	0.0246987			9.27228	0.0358447			9.26895	0.0752211			9.27062	0.148393			9.27187	0.430264			9.27208	1.63993			9.27145	7.06372			9.26895	17.8408
9.27895	0.0486746			9.27395	0.128284			9.27728	0.233315			9.27895	0.448376			9.27542	0.0240579			9.27895	0.0362396			9.27562	0.0759736			9.27728	0.149675			9.27853	0.438467			9.27875	1.68545			9.27812	7.2563			9.27562	18.2082
9.28562	0.0491589			9.28062	0.128627			9.28395	0.232652			9.28562	0.447355			9.28208	0.023149			9.28562	0.0369251			9.28228	0.0762716			9.28395	0.15074			9.2852	0.446603			9.28542	1.73055			9.28478	7.44659			9.28228	18.5618
9.29228	0.0494793			9.28728	0.128098			9.29062	0.232041			9.29228	0.445724			9.28875	0.0221357			9.29228	0.0374392			9.28895	0.07613			9.29062	0.152245			9.29187	0.45497			9.29208	1.77558			9.29145	7.63399			9.28895	18.9013
9.29895	0.0497773			9.29395	0.127144			9.29728	0.231758			9.29895	0.44281			9.29542	0.021562			9.29895	0.0375956			9.29562	0.0758022			9.29728	0.154577			9.29853	0.463016			9.29875	1.82109			9.29812	7.81837			9.29562	19.2268
9.30562	0.0498295			9.30062	0.126496			9.30395	0.231534			9.30562	0.438921			9.30208	0.0214726			9.30562	0.0380427			9.30228	0.0757724			9.30395	0.157624			9.3052	0.470787			9.30542	1.86693			9.30478	7.99939			9.30228	19.5383
9.31228	0.0493899			9.30728	0.126317			9.31062	0.231102			9.31228	0.435174			9.30875	0.0215322			9.31228	0.0389293			9.30895	0.0762045			9.31062	0.160582			9.31187	0.479311			9.31208	1.91314			9.31145	8.17713			9.30895	19.8355
9.31895	0.0489652			9.31395	0.12625			9.31728	0.230297			9.31895	0.432149			9.31542	0.0221655			9.31895	0.0402778			9.31562	0.0770539			9.31728	0.164136			9.31853	0.488803			9.31875	1.95967			9.31812	8.35144			9.31562	20.1176
9.32562	0.0488833			9.32062	0.126027			9.32395	0.228986			9.32562	0.429653			9.32208	0.0231937			9.32562	0.0410974			9.32228	0.0780597			9.32395	0.168487			9.3252	0.49825			9.32542	2.00637			9.32478	8.52157			9.32228	20.3847
9.33228	0.0488386			9.32728	0.126228			9.33062	0.227466			9.33228	0.427589			9.32875	0.024341			9.33228	0.0410527			9.32895	0.078924			9.33062	0.173375			9.33187	0.507057			9.33208	2.05291			9.33145	8.68715			9.32895	20.6366
9.33895	0.0488758			9.33395	0.126548			9.33728	0.22617			9.33895	0.425987			9.33542	0.0249743			9.33895	0.0406504			9.33562	0.0791997			9.33728	0.178769			9.33853	0.515483			9.33875	2.09875			9.33812	8.84786			9.33562	20.8733
9.34562	0.0489801			9.34062	0.126556			9.34395	0.225537			9.34562	0.424661			9.34208	0.0251532			9.34562	0.0403076			9.34228	0.0787303			9.34395	0.185028			9.3452	0.523694			9.34542	2.1441			9.34478	9.00362			9.34228	21.0951
9.35228	0.0494346			9.34728	0.125952			9.35062	0.225328			9.35228	0.423089			9.34875	0.0252426			9.35228	0.0399575			9.34895	0.0777915			9.35062	0.193104			9.35187	0.531428			9.35208	2.18904			9.35145	9.15401			9.34895	21.3015
9.35895	0.0494272			9.35395	0.124961			9.35728	0.224955			9.35895	0.421375			9.35542	0.0251085			9.35895	0.039205			9.35562	0.0768527			9.35728	0.203013			9.35853	0.538595			9.35875	2.23351			9.35812	9.29898			9.35562	21.4932
9.36562	0.0486746			9.36062	0.123985			9.36395	0.22433			9.36562	0.419676			9.36208	0.0250563			9.36562	0.0385046			9.36228	0.0767857			9.36395	0.215061			9.3652	0.5458			9.36542	2.27757			9.36478	9.43869			9.36228	21.6706
9.37228	0.0472069			9.36728	0.123061			9.37062	0.223383			9.37228	0.417888			9.36875	0.0252873			9.37228	0.0384375			9.36895	0.0778064			9.37062	0.229955			9.37187	0.553317			9.37208	2.32161			9.37145	9.57312			9.36895	21.8349
9.37895	0.0453442			9.37395	0.122271			9.37728	0.222042			9.37895	0.41604			9.37542	0.0257045			9.37895	0.038974			9.37562	0.0798255			9.37728	0.248291			9.37853	0.560954			9.37875	2.36617			9.37812	9.70221			9.37562	21.9858
9.38562	0.0439659			9.38062	0.121392			9.38395	0.220127			9.38562	0.414021			9.38208	0.0261441			9.38562	0.0394285			9.38228	0.0822023			9.38395	0.26989			9.3852	0.568569			9.38542	2.41058			9.38478	9.8261			9.38228	22.1226
9.39228	0.0430793			9.38728	0.120491			9.39062	0.217907			9.39228	0.411898			9.38875	0.0263527			9.39228	0.039503			9.38895	0.0846684			9.39062	0.294432			9.39187	0.576273			9.39208	2.45403			9.39145	9.9445			9.38895	22.2445
9.39895	0.0429228			9.39395	0.119746			9.39728	0.216179			9.39895	0.409588			9.39542	0.0264123			9.39895	0.0396073			9.39562	0.0874102			9.39728	0.322483			9.39853	0.584155			9.39875	2.49656			9.39812	10.0571			9.39562	22.3521
9.40562	0.043124			9.40062	0.119336			9.40395	0.215366			9.40562	0.406824			9.40208	0.0260696			9.40562	0.0400022			9.40228	0.0897869			9.40395	0.35499			9.4052	0.592031			9.40542	2.53854			9.40478	10.1634			9.40228	22.4463
9.41228	0.0434816			9.40728	0.119254			9.41062	0.215188			9.41228	0.404008			9.40875	0.0255406			9.41228	0.040561			9.40895	0.0917912			9.41062	0.392102			9.41187	0.599891			9.41208	2.57991			9.41145	10.2636			9.40895	22.5274
9.41895	0.0437647			9.41395	0.119425			9.41728	0.215329			9.41895	0.401363			9.41542	0.025183			9.41895	0.0410378			9.41562	0.0939444			9.41728	0.433981			9.41853	0.607774			9.41875	2.62003			9.41812	10.3579			9.41562	22.5958
9.42562	0.0437573			9.42062	0.119649			9.42395	0.215501			9.42562	0.399195			9.42208	0.0250787			9.42562	0.0413433			9.42228	0.0969172			9.42395	0.48174			9.4252	0.615776			9.42542	2.65928			9.42478	10.4462			9.42228	22.6524
9.43228	0.0437722			9.42728	0.120051			9.43062	0.21565			9.43228	0.397049			9.42875	0.0254661			9.43228	0.0415668			9.42895	0.101089			9.43062	0.536546			9.43187	0.62377			9.43208	2.6979			9.43145	10.5285			9.42895	22.6985
9.43895	0.0439137			9.43395	0.120521			9.43728	0.215322			9.43895	0.394627			9.43542	0.0261068			9.43895	0.0416636			9.43562	0.105962			9.43728	0.599235			9.43853	0.631787			9.43875	2.73602			9.43812	10.6049			9.43562	22.7342
9.44562	0.0441074			9.44062	0.120521			9.44395	0.214249			9.44562	0.392772			9.44208	0.026904			9.44562	0.041686			9.44228	0.11196			9.44395	0.670001			9.4452	0.639945			9.44542	2.77331			9.44478	10.6756			9.44228	22.7585
9.45228	0.0447035			9.44728	0.119634			9.45062	0.212878			9.45228	0.391372			9.44875	0.0276566			9.45228	0.041835			9.44895	0.119254			9.45062	0.749342			9.45187	0.647575			9.45208	2.80994			9.45145	10.7404			9.44895	22.771
9.45895	0.0459924			9.45395	0.118159			9.45728	0.211559			9.45895	0.389948			9.45542	0.0283495			9.45895	0.0419319			9.45562	0.128001			9.45728	0.837445			9.45853	0.654444			9.45875	2.8461			9.45812	10.7993			9.45562	22.7723
9.46562	0.0476018			9.46062	0.117026			9.46395	0.210464			9.46562	0.388004			9.46208	0.028789			9.46562	0.0421181			9.46228	0.138022			9.46395	0.93513			9.4652	0.660717			9.46542	2.8815			9.46478	10.8527			9.46228	22.7637
9.47228	0.0485703			9.46728	0.116289			9.47062	0.209607			9.47228	0.386208			9.46875	0.0283793			9.47228	0.0425503			9.46895	0.149168			9.47062	1.04374			9.47187	0.667453			9.47208	2.91615			9.47145	10.9003			9.46895	22.7456
9.47895	0.0483841			9.47395	0.115953			9.47728	0.209019			9.47895	0.385292			9.47542	0.0273809			9.47895	0.04334			9.47562	0.161707			9.47728	1.16508			9.47853	0.674546			9.47875	2.94974			9.47812	10.942			9.47562	22.7178
9.48562	0.0478625			9.48062	0.115976			9.48395	0.208594			9.48562	0.384383			9.48208	0.026457			9.48562	0.0444353			9.48228	0.175871			9.48395	1.30045			9.4852	0.681631			9.48542	2.98234			9.48478	10.9778			9.48228	22.6806
9.49228	0.0471175			9.48728	0.116505			9.49062	0.208229			9.49228	0.382878			9.48875	0.0258908			9.49228	0.0454038			9.48895	0.191748			9.49062	1.45101			9.49187	0.688985			9.49208	3.01348			9.49145	11.0085			9.48895	22.6344
9.49895	0.0459477			9.49395	0.117183			9.49728	0.207804			9.49895	0.380889			9.49542	0.0255406			9.49895	0.0462979			9.49562	0.209369			9.49728	1.61805			9.49853	0.696979			9.49875	3.04312			9.49812	11.0342			9.49562	22.5792
9.50562	0.0445843			9.50062	0.117823			9.50395	0.207759			9.50562	0.378981			9.50208	0.0251755			9.50562	0.047259			9.50228	0.229046			9.50395	1.80212			9.5052	0.705831			9.50542	3.07178			9.50478	11.0549			9.50228	22.5146
9.51228	0.0436902			9.50728	0.118241			9.51062	0.207722			9.51228	0.377357			9.50875	0.0250563			9.51228	0.0482053			9.50895	0.251099			9.51062	2.00317			9.51187	0.714473			9.51208	3.09986			9.51145	11.0709			9.50895	22.4408
9.51895	0.043653			9.51395	0.118263			9.51728	0.2077			9.51895	0.375912			9.51542	0.025399			9.51895	0.0487193			9.51562	0.275724			9.51728	2.22062			9.51853	0.722736			9.51875	3.12733			9.51812	11.0825			9.51562	22.3591
9.52562	0.043802			9.52062	0.117816			9.52395	0.208028			9.52562	0.374757			9.52208	0.0261292			9.52562	0.0490248			9.52228	0.302918			9.52395	2.45458			9.5252	0.730559			9.52542	3.1537			9.52478	11.0902			9.52228	22.2706
9.53228	0.0440851			9.52728	0.117265			9.53062	0.208788			9.53228	0.374213			9.52875	0.0269786			9.53228	0.0498891			9.52895	0.333257			9.53062	2.7057			9.53187	0.738114			9.53208	3.17879			9.53145	11.0934			9.52895	22.1754
9.53895	0.0444576			9.53395	0.116684			9.53728	0.209779			9.53895	0.374094			9.53542	0.0279248			9.53895	0.051707			9.53562	0.367559			9.53728	2.97429			9.53853	0.745602			9.53875	3.20307			9.53812	11.0913			9.53562	22.0732
9.54562	0.0444278			9.54062	0.115789			9.54395	0.210263			9.54562	0.374272			9.54208	0.0290647			9.54562	0.0535995			9.54228	0.406444			9.54395	3.26068			9.5452	0.752769			9.54542	3.22657			9.54478	11.0841			9.54228	21.9645
9.55228	0.0440851			9.54728	0.114948			9.55062	0.210851			9.55228	0.374645			9.54875	0.03016			9.55228	0.0551194			9.54895	0.449963			9.55062	3.56481			9.55187	0.759579			9.55208	3.24915			9.55145	11.0731			9.54895	21.8499
9.55895	0.0436977			9.55395	0.11453			9.55728	0.211529			9.55895	0.374846			9.55542	0.0308827			9.55895	0.0567883			9.55562	0.498123			9.55728	3.88638			9.55853	0.766262			9.55875	3.27063			9.55812	11.0583			9.55562	21.7293
9.56562	0.0436381			9.56062	0.114687			9.56395	0.212207			9.56562	0.375107			9.56208	0.0307411			9.56562	0.0589117			9.56228	0.551432			9.56395	4.22458			9.5652	0.773393			9.56542	3.29125			9.56478	11.0396			9.56228	21.6025
9.57228	0.0437051			9.56728	0.115067			9.57062	0.212356			9.57228	0.375733			9.56875	0.0301152			9.57228	0.0616685			9.56895	0.610664			9.57062	4.57855			9.57187	0.780933			9.57208	3.31105			9.57145	11.0169			9.56895	21.47
9.57895	0.0436157			9.57395	0.115752			9.57728	0.2122			9.57895	0.377066			9.57542	0.0291094			9.57895	0.0646487			9.57562	0.676066			9.57728	4.94748			9.57853	0.788443			9.57875	3.32969			9.57812	10.9912			9.57562	21.3323
9.58562	0.0437126			9.58062	0.117101			9.58395	0.212356			9.58562	0.379227			9.58208	0.0282377			9.58562	0.0684261			9.58228	0.747696			9.58395	5.32985			9.5852	0.795774			9.58542	3.3467			9.58478	10.9624			9.58228	21.1895
9.59228	0.0437722			9.58728	0.118941			9.59062	0.21299			9.59228	0.381939			9.58875	0.027746			9.59228	0.0731722			9.58895	0.826336			9.59062	5.72424			9.59187	0.803627			9.59208	3.36216			9.59145	10.9294			9.58895	21.0412
9.59895	0.0437573			9.59395	0.120863			9.59728	0.214525			9.59895	0.385061			9.59542	0.0274181			9.59895	0.0788942			9.59562	0.912845			9.59728	6.12999			9.59853	0.811711			9.59875	3.37639			9.59812	10.8924			9.59562	20.8881
9.60562	0.0438169			9.60062	0.122704			9.60395	0.216529			9.60562	0.388503			9.60208	0.0276193			9.60562	0.0852868			9.60228	1.00755			9.60395	6.54623			9.6052	0.81943			9.60542	3.38962			9.60478	10.8519			9.60228	20.7313
9.61228	0.0440776			9.60728	0.124112			9.61062	0.219092			9.61228	0.391938			9.60875	0.0281483			9.61228	0.0916719			9.60895	1.11002			9.61062	6.97141			9.61187	0.826985			9.61208	3.40222			9.61145	10.8089			9.60895	20.5713
9.61895	0.0450313			9.61395	0.125021			9.61728	0.222124			9.61895	0.395708			9.61542	0.0290349			9.61895	0.0978783			9.61562	1.22044			9.61728	7.40367			9.61853	0.83448			9.61875	3.4139			9.61812	10.7635			9.61562	20.4085
9.62562	0.0464097			9.62062	0.125647			9.62395	0.225775			9.62562	0.399612			9.62208	0.029698			9.62562	0.104189			9.62228	1.33944			9.62395	7.8413			9.6252	0.842072			9.62542	3.42461			9.62478	10.7157			9.62228	20.2425
9.63228	0.0479817			9.62728	0.126272			9.63062	0.229917			9.63228	0.404045			9.62875	0.0303537			9.63228	0.110976			9.62895	1.46731			9.63062	8.28258			9.63187	0.84915			9.63208	3.43417			9.63145	10.6653			9.62895	20.0739
9.63895	0.0492334			9.63395	0.127167			9.63728	0.233881			9.63895	0.409633			9.63542	0.0312626			9.63895	0.118181			9.63562	1.60439			9.63728	8.72511			9.63853	0.85593			9.63875	3.44262			9.63812	10.6118			9.63562	19.9028
9.64562	0.0498146			9.64062	0.128038			9.64395	0.23786			9.64562	0.416897			9.64208	0.0323802			9.64562	0.126101			9.64228	1.7511			9.64395	9.16695			9.6452	0.862814			9.64542	3.4501			9.64478	10.5552			9.64228	19.7291
9.65228	0.0500605			9.64728	0.128977			9.65062	0.242248			9.65228	0.426121			9.64875	0.033617			9.65228	0.135504			9.64895	1.90817			9.65062	9.60622			9.65187	0.869803			9.65208	3.45634			9.65145	10.4958			9.64895	19.5527
9.65895	0.0500605			9.65395	0.130042			9.65728	0.247486			9.65895	0.436828			9.65542	0.0347942			9.65895	0.147209			9.65562	2.07555			9.65728	10.0412			9.65853	0.876941			9.65875	3.46194			9.65812	10.4342			9.65562	19.3739
9.66562	0.0501201			9.66062	0.131324			9.66395	0.253648			9.66562	0.448927			9.66208	0.0358671			9.66562	0.160612			9.66228	2.25256			9.66395	10.4703			9.6652	0.883855			9.66542	3.46687			9.66478	10.3709			9.66228	19.1934
9.67228	0.0501648			9.66728	0.133246			9.67062	0.260204			9.67228	0.46207			9.66875	0.036709			9.67228	0.175148			9.66895	2.43855			9.67062	10.8922			9.67187	0.89065			9.67208	3.47114			9.67145	10.306			9.66895	19.0115
9.67895	0.0505149			9.67395	0.135832			9.67728	0.267491			9.67895	0.476331			9.67542	0.0375286			9.67895	0.190422			9.67562	2.63333			9.67728	11.3062			9.67853	0.897512			9.67875	3.47468			9.67812	10.2396			9.67562	18.8284
9.68562	0.0513569			9.68062	0.139035			9.68395	0.275627			9.68562	0.491805			9.68208	0.0382736			9.68562	0.206433			9.68228	2.8368			9.68395	11.7112			9.6852	0.904635			9.68542	3.47715			9.68478	10.1717			9.68228	18.6444
9.69228	0.0525489			9.68728	0.142783			9.69062	0.284955			9.69228	0.508718			9.68875	0.0386313			9.69228	0.223339			9.68895	3.04846			9.69062	12.1058			9.69187	0.911601			9.69208	3.47861			9.69145	10.1023			9.68895	18.459
9.69895	0.0536218			9.69395	0.14744			9.69728	0.295393			9.69895	0.527248			9.69542	0.0389665			9.69895	0.241227			9.69562	3.26785			9.69728	12.4888			9.69853	0.91856			9.69875	3.47894			9.69812	10.0311			9.69562	18.2723
9.70562	0.0547245			9.70062	0.152655			9.70395	0.30677			9.70562	0.547498			9.70208	0.0399798			9.70562	0.260755			9.70228	3.49467			9.70395	12.8596			9.7052	0.925452			9.70542	3.47844			9.70478	9.95807			9.70228	18.0851
9.71228	0.056237			9.70728	0.157647			9.71062	0.319451			9.71228	0.569753			9.70875	0.0417903			9.71228	0.282235			9.70895	3.72856			9.71062	13.2177			9.71187	0.932254			9.71208	3.47671			9.71145	9.88359			9.70895	17.8978
9.71895	0.0583977			9.71395	0.16211			9.71728	0.333592			9.71895	0.594236			9.71542	0.0436679			9.71895	0.306487			9.71562	3.9686			9.71728	13.5625			9.71853	0.938699			9.71875	3.47337			9.71812	9.80801			9.71562	17.7099
9.72562	0.0608042			9.72062	0.166535			9.72395	0.348926			9.72562	0.621051			9.72208	0.0453517			9.72562	0.333734			9.72228	4.21376			9.72395	13.8939			9.7252	0.944376			9.72542	3.46857			9.72478	9.73132			9.72228	17.5208
9.73228	0.0629053			9.72728	0.171326			9.73062	0.365086			9.73228	0.650018			9.72875	0.0477135			9.73228	0.363611			9.72895	4.46303			9.73062	14.2118			9.73187	0.949688			9.73208	3.46266			9.73145	9.6532			9.72895	17.3311
9.73895	0.0646859			9.73395	0.176243			9.73728	0.381835			9.73895	0.681616			9.73542	0.0507757			9.73895	0.395484			9.73562	4.7152			9.73728	14.5166			9.73853	0.95465			9.73875	3.45571			9.73812	9.57397			9.73562	17.1416
9.74562	0.0664145			9.74062	0.181265			9.74395	0.399493			9.74562	0.716515			9.74208	0.0537783			9.74562	0.429288			9.74228	4.96933			9.74395	14.8076			9.7452	0.960067			9.74542	3.44794			9.74478	9.49398			9.74228	16.9526
9.75228	0.0683218			9.74728	0.186935			9.75062	0.418559			9.75228	0.755042			9.74875	0.0563189			9.75228	0.465855			9.74895	5.22488			9.75062	15.0842			9.75187	0.966087			9.75208	3.43993			9.75145	9.41345			9.74895	16.7636
9.75895	0.0702888			9.75395	0.193603			9.75728	0.439316			9.75895	0.796616			9.75542	0.0592023			9.75895	0.505365			9.75562	5.48134			9.75728	15.3455			9.75853	0.97248			9.75875	3.43176			9.75812	9.3324			9.75562	16.5745
9.76562	0.0725687			9.76062	0.201307			9.76395	0.462241			9.76562	0.840992			9.76208	0.0627115			9.76562	0.547938			9.76228	5.7376			9.76395	15.5917			9.7652	0.978872			9.76542	3.42333			9.76478	9.25109			9.76228	16.3861
9.77228	0.0754893			9.76728	0.210188			9.77062	0.48735			9.77228	0.888839			9.76875	0.066109			9.77228	0.593618			9.76895	5.992			9.77062	15.8236			9.77187	0.984855			9.77208	3.41446			9.77145	9.16984			9.76895	16.1988
9.77895	0.0793114			9.77395	0.219822			9.77728	0.514552			9.77895	0.9408			9.77542	0.0689849			9.77895	0.642687			9.77562	6.2433			9.77728	16.042			9.77853	0.990152			9.77875	3.40541			9.77812	9.08872			9.77562	16.013
9.78562	0.0836104			9.78062	0.230059			9.78395	0.543907			9.78562	0.997126			9.78208	0.0715926			9.78562	0.695355			9.78228	6.49063			9.78395	16.2473			9.7852	0.994541			9.78542	3.39572			9.78478	9.00723			9.78228	15.8275
9.79228	0.0878796			9.78728	0.240333			9.79062	0.575274			9.79228	1.05809			9.78875	0.0743121			9.79228	0.751488			9.78895	6.73283			9.79062	16.4403			9.79187	0.998273			9.79208	3.38504			9.79145	8.92504			9.78895	15.6424
9.79895	0.0917539			9.79395	0.251129			9.79728	0.608526			9.79895	1.12413			9.79542	0.0770167			9.79895	0.810944			9.79562	6.96914			9.79728	16.6219			9.79853	1.00198			9.79875	3.37347			9.79812	8.84228			9.79562	15.4579
9.80562	0.0954047			9.80062	0.262961			9.80395	0.643723			9.80562	1.19558			9.80208	0.0802577			9.80562	0.87367			9.80228	7.19901			9.80395	16.7921			9.8052	1.00615			9.80542	3.36099			9.80478	8.75904			9.80228	15.2744
9.81228	0.0993311			9.80728	0.275746			9.81062	0.681028			9.81228	1.27246			9.80875	0.0841469			9.81228	0.939764			9.80895	7.4223			9.81062	16.9502			9.81187	1.0107			9.81208	3.34777			9.81145	8.6751			9.80895	15.0916
9.81895	0.103623			9.81395	0.289515			9.81728	0.720963			9.81895	1.35502			9.81542	0.0886917			9.81895	1.00963			9.81562	7.63867			9.81728	17.0957			9.81853	1.01573			9.81875	3.33373			9.81812	8.59024			9.81562	14.9095
9.82562	0.108086			9.82062	0.303976			9.82395	0.763416			9.82562	1.4437			9.82208	0.0938103			9.82562	1.08307			9.82228	7.84776			9.82395	17.2292			9.8252	1.02094			9.82542	3.31938			9.82478	8.50531			9.82228	14.7288
9.83228	0.112846			9.82728	0.319332			9.83062	0.808701			9.83228	1.53898			9.82875	0.0995025			9.83228	1.15984			9.82895	8.04963			9.83062	17.351			9.83187	1.02612			9.83208	3.30476			9.83145	8.42076			9.82895	14.5502
9.83895	0.118256			9.83395	0.335529			9.83728	0.857294			9.83895	1.64177			9.83542	0.105992			9.83895	1.23978			9.83562	8.24393			9.83728	17.4617			9.83853	1.03065			9.83875	3.2898			9.83812	8.33643			9.83562	14.3731
9.84562	0.124216			9.84062	0.352755			9.84395	0.909612			9.84562	1.75307			9.84208	0.112638			9.84562	1.32263			9.84228	8.43014			9.84395	17.5619			9.8452	1.03457			9.84542	3.27484			9.84478	8.25221			9.84228	14.197
9.85228	0.130229			9.84728	0.371464			9.85062	0.966169			9.85228	1.87363			9.84875	0.119716			9.85228	1.40814			9.84895	8.60767			9.85062	17.6524			9.85187	1.03847			9.85208	3.25974			9.85145	8.16856			9.84895	14.0222
9.85895	0.13651			9.85395	0.391468			9.85728	1.02691			9.85895	2.00357			9.85542	0.127278			9.85895	1.49569			9.85562	8.7767			9.85728	17.7332			9.85853	1.0422			9.85875	3.24417			9.85812	8.08553			9.85562	13.849
9.86562	0.14367			9.86062	0.41303			9.86395	1.0919			9.86562	2.14298			9.86208	0.135757			9.86562	1.58523			9.86228	8.93741			9.86395	17.8042			9.8652	1.04559			9.86542	3.22807			9.86478	8.00232			9.86228	13.6772
9.87228	0.151798			9.86728	0.436477			9.87062	1.1614			9.87228	2.29245			9.86875	0.14507			9.87228	1.67669			9.86895	9.08972			9.87062	17.8654			9.87187	1.04871			9.87208	3.21142			9.87145	7.91865			9.86895	13.5065
9.87895	0.160977			9.87395	0.462025			9.87728	1.23568			9.87895	2.45315			9.87542	0.155039			9.87895	1.76979			9.87562	9.23344			9.87728	17.9172			9.87853	1.05231			9.87875	3.19459			9.87812	7.83531			9.87562	13.3372
9.88562	0.171021			9.88062	0.48919			9.88395	1.31509			9.88562	2.62599			9.88208	0.165679			9.88562	1.8639			9.88228	9.36854			9.88395	17.9597			9.8852	1.05622			9.88542	3.1772			9.88478	7.75257			9.88228	13.17
9.89228	0.182047			9.88728	0.517786			9.89062	1.39988			9.89228	2.81171			9.88875	0.177011			9.89228	1.95857			9.88895	9.4957			9.89062	17.9927			9.89187	1.05948			9.89208	3.15925			9.89145	7.67025			9.88895	13.0045
9.89895	0.193484			9.89395	0.548556			9.89728	1.49094			9.89895	3.01116			9.89542	0.189133			9.89895	2.05362			9.89562	9.61522			9.89728	18.0168			9.89853	1.06197			9.89875	3.1406			9.89812	7.58799			9.89562	12.8399
9.90562	0.205055			9.90062	0.581793			9.90395	1.58906			9.90562	3.22528			9.90208	0.202164			9.90562	2.14875			9.90228	9.72738			9.90395	18.0325			9.9052	1.06446			9.90542	3.12126			9.90478	7.50598			9.90228	12.6764
9.91228	0.217207			9.90728	0.617355			9.91062	1.69425			9.91228	3.45509			9.90875	0.216022			9.91228	2.24324			9.90895	9.83181			9.91062	18.0401			9.91187	1.06665			9.91208	3.10184			9.91145	7.4247			9.90895	12.5149
9.91895	0.230134			9.91395	0.654966			9.91728	1.80633			9.91895	3.70108			9.91542	0.230387			9.91895	2.33615			9.91562	9.92861			9.91728	18.0394			9.91853	1.06797			9.91875	3.08236			9.91812	7.34384			9.91562	12.3557
9.92562	0.24388			9.92062	0.694826			9.92395	1.9256			9.92562	3.96378			9.92208	0.245176			9.92562	2.42755			9.92228	10.0183			9.92395	18.0303			9.9252	1.06839			9.92542	3.063			9.92478	7.26335			9.92228	12.1983
9.93228	0.258029			9.92728	0.7369			9.93062	2.05269			9.93228	4.24409			9.92875	0.260592			9.93228	2.51746			9.92895	10.1006			9.93062	18.013			9.93187	1.0692			9.93208	3.04336			9.93145	7.18265			9.92895	12.0422
9.93895	0.27322			9.93395	0.781491			9.93728	2.18804			9.93895	4.54285			9.93542	0.277057			9.93895	2.60596			9.93562	10.1756			9.93728	17.9873			9.93853	1.07088			9.93875	3.02342			9.93812	7.10215			9.93562	11.8875
9.94562	0.28982			9.94062	0.828817			9.94395	2.33185			9.94562	4.86068			9.94208	0.294454			9.94562	2.69291			9.94228	10.2432			9.94395	17.9533			9.9452	1.0729			9.94542	3.003			9.94478	7.02258			9.94228	11.7348
9.95228	0.307865			9.94728	0.879213			9.95062	2.4844			9.95228	5.19752			9.94875	0.31276			9.95228	2.77852			9.94895	10.3044			9.95062	17.9114			9.95187	1.07488			9.95208	2.98218			9.95145	6.94405			9.94895	11.584
9.95895	0.326805			9.95395	0.9325			9.95728	2.64646			9.95895	5.55342			9.95542	0.332013			9.95895	2.8629			9.95562	10.3597			9.95728	17.8622			9.95853	1.07674			9.95875	2.96088			9.95812	6.86636			9.95562	11.4347
9.96562	0.346631			9.96062	0.98896			9.96395	2.81817			9.96562	5.92867			9.96208	0.35204			9.96562	2.94507			9.96228	10.4087			9.96395	17.8061			9.9652	1.07852			9.96542	2.93906			9.96478	6.78907			9.96228	11.2871
9.97228	0.368059			9.96728	1.049			9.97062	2.99951			9.97228	6.32361			9.96875	0.372693			9.97228	3.0242			9.96895	10.4519			9.97062	17.7431			9.97187	1.0799			9.97208	2.91692			9.97145	6.71219			9.96895	11.1415
9.97895	0.390887			9.97395	1.11284			9.97728	3.19037			9.97895	6.73792			9.97542	0.393845			9.97895	3.09996			9.97562	10.4896			9.97728	17.674			9.97853	1.08059			9.97875	2.8951			9.97812	6.63585			9.97562	10.998
9.98562	0.414714			9.98062	1.18022			9.98395	3.39074			9.98562	7.17135			9.98208	0.415176			9.98562	3.17269			9.98228	10.522			9.98395	17.5988			9.9852	1.08038			9.98542	2.87386			9.98478	6.56023			9.98228	10.8562
9.99228	0.438891			9.98728	1.25092			9.99062	3.60084			9.99228	7.62331			9.98875	0.436842			9.99228	3.24243			9.98895	10.5489			9.99062	17.5178			9.99187	1.07961			9.99208	2.85273			9.99145	6.48565			9.98895	10.7158
9.99895	0.464037			9.99395	1.32507			9.99728	3.82026			9.99895	8.0927			9.99542	0.458829			9.99895	3.30916			9.99562	10.5697			9.99728	17.4306			9.99853	1.0787			9.99875	2.83171			9.99812	6.41182			9.99562	10.5766
10.0056	0.490576			10.0006	1.40268			10.0039	4.04916			10.0056	8.57792			10.0021	0.481434			10.0056	3.37324			10.0023	10.5844			10.0039	17.3378			10.0052	1.07794			10.0054	2.81066			10.0048	6.33814			10.0023	10.4389
10.0123	0.518359			10.0073	1.48376			10.0106	4.28712			10.0123	9.07728			10.0087	0.5043			10.0123	3.43508			10.009	10.5935			10.0106	17.24			10.0119	1.07731			10.0121	2.78961			10.0114	6.26477			10.009	10.3028
10.019	0.547126			10.0139	1.56774			10.0173	4.53369			10.019	9.58935			10.0154	0.527397			10.019	3.49467			10.0156	10.5974			10.0173	17.1371			10.0185	1.07685			10.0188	2.76802			10.0181	6.19192			10.0156	10.1687
10.0256	0.576913			10.0206	1.65465			10.0239	4.78832			10.0256	10.1127			10.0221	0.551052			10.0256	3.55145			10.0223	10.5959			10.0239	17.03			10.0252	1.0763			10.0254	2.74558			10.0248	6.11959			10.0223	10.0363
10.0323	0.6079			10.0273	1.74458			10.0306	5.0508			10.0323	10.646			10.0288	0.574864			10.0323	3.60493			10.029	10.5893			10.0306	16.919			10.0319	1.07562			10.0321	2.72256			10.0314	6.04725			10.029	9.90562
10.0389	0.639886			10.034	1.8377			10.0373	5.32077			10.0389	11.1876			10.0354	0.598788			10.0389	3.65487			10.0356	10.5776			10.0373	16.8046			10.0385	1.07477			10.0388	2.69914			10.0381	5.97545			10.0356	9.77698
10.0456	0.672825			10.0406	1.93362			10.044	5.59696			10.0456	11.7358			10.0421	0.622831			10.0456	3.7013			10.0423	10.5613			10.044	16.6859			10.0452	1.07355			10.0454	2.67543			10.0448	5.90481			10.0423	9.65023
10.0523	0.706755			10.0473	2.03162			10.0506	5.87852			10.0523	12.2876			10.0488	0.647053			10.0523	3.74453			10.0489	10.5407			10.0506	16.5624			10.0519	1.07174			10.0521	2.65166			10.0515	5.83573			10.0489	9.52501
10.0589	0.741586			10.054	2.13183			10.0573	6.16466			10.0589	12.8408			10.0554	0.671111			10.0589	3.78475			10.0556	10.5153			10.0573	16.4352			10.0585	1.0693			10.0587	2.6281			10.0581	5.76767			10.0556	9.40073
10.0656	0.776909			10.0606	2.23411			10.064	6.45472			10.0656	13.3927			10.0621	0.694714			10.0656	3.82195			10.0623	10.4851			10.064	16.305			10.0652	1.06692			10.0654	2.60486			10.0648	5.69999			10.0623	9.27765
10.0723	0.812598			10.0673	2.33769			10.0706	6.74774			10.0723	13.9413			10.0687	0.717849			10.0723	3.8558			10.0689	10.4502			10.0706	16.1716			10.0719	1.06477			10.0721	2.58175			10.0715	5.63267			10.0689	9.1561
10.079	0.848822			10.0739	2.44202			10.0773	7.04279			10.079	14.4842			10.0754	0.739828			10.079	3.88679			10.0756	10.4111			10.0773	16.0355			10.0785	1.06245			10.0787	2.55869			10.0781	5.56567			10.0756	9.03609
10.0856	0.885442			10.0806	2.54724			10.0839	7.33871			10.0856	15.0197			10.0821	0.760287			10.0856	3.91535			10.0823	10.3675			10.0839	15.8975			10.0852	1.05964			10.0854	2.53576			10.0848	5.49943			10.0823	8.91767
10.0923	0.922322			10.0873	2.65359			10.0906	7.63387			10.0923	15.5462			10.0887	0.779502			10.0923	3.94164			10.089	10.3197			10.0906	15.758			10.0919	1.05645			10.0921	2.51281			10.0915	5.43363			10.089	8.80107
10.099	0.95921			10.0939	2.76031			10.0973	7.92696			10.099	16.062			10.0954	0.798099			10.099	3.96527			10.0956	10.2683			10.0973	15.6164			10.0985	1.05321			10.0988	2.48979			10.0981	5.36821			10.0956	8.68674
10.1056	0.99615			10.1006	2.86683			10.1039	8.21725			10.1056	16.5658			10.1021	0.816114			10.1056	3.98608			10.1023	10.2142			10.1039	15.4726			10.1052	1.04959			10.1054	2.46688			10.1048	5.30347			10.1023	8.57455
10.1123	1.03313			10.1073	2.97365			10.1106	8.50389			10.1123	17.0562			10.1088	0.833541			10.1123	4.00449			10.109	10.157			10.1106	15.3275			10.1119	1.0455			10.1121	2.44421			10.1114	5.23971			10.109	8.464
10.1189	1.06974			10.114	3.08038			10.1173	8.78555			10.1189	17.5314			10.1154	0.851013			10.1189	4.02071			10.1156	10.0965			10.1173	15.181			10.1185	1.041			10.1188	2.42147			10.1181	5.17701			10.1156	8.35454
10.1256	1.10579			10.1206	3.18606			10.124	9.0611			10.1256	17.9897			10.1221	0.868551			10.1256	4.03481			10.1223	10.0324			10.124	15.0329			10.1252	1.03659			10.1254	2.39861			10.1248	5.1147			10.1223	8.24597
10.1323	1.14125			10.1273	3.28988			10.1306	9.33027			10.1323	18.4301			10.1288	0.885993			10.1323	4.04644			10.1289	9.9651			10.1306	14.8832			10.1319	1.03232			10.1321	2.37572			10.1314	5.05318			10.1289	8.13843
10.1389	1.17633			10.134	3.39162			10.1373	9.5928			10.1389	18.852			10.1354	0.90263			10.1389	4.05556			10.1356	9.89459			10.1373	14.7326			10.1385	1.02779			10.1387	2.35286			10.1381	4.99269			10.1356	8.03202
10.1456	1.211			10.1406	3.49132			10.144	9.84757			10.1456	19.2541			10.1421	0.918075			10.1456	4.06235			10.1423	9.82096			10.144	14.5816			10.1452	1.02299			10.1454	2.32977			10.1448	4.93306			10.1423	7.92706
10.1523	1.24499			10.1473	3.58827			10.1506	10.0934			10.1523	19.6352			10.1487	0.932075			10.1523	4.06719			10.1489	9.74453			10.1506	14.4297			10.1519	1.01797			10.1521	2.30641			10.1515	4.87401			10.1489	7.82361
10.159	1.27808			10.154	3.68222			10.1573	10.33			10.159	19.9948			10.1554	0.94492			10.159	4.06983			10.1556	9.66586			10.1573	14.2765			10.1585	1.01287			10.1587	2.28325			10.1581	4.81538			10.1556	7.72184
10.1656	1.30994			10.1606	3.77291			10.1639	10.5571			10.1656	20.3335			10.1621	0.957087			10.1656	4.06991			10.1623	9.58548			10.1639	14.1223			10.1652	1.00763			10.1654	2.26033			10.1648	4.75761			10.1623	7.62171
10.1723	1.34007			10.1673	3.86019			10.1706	10.7744			10.1723	20.6513			10.1687	0.968158			10.1723	4.06763			10.169	9.50383			10.1706	13.9675			10.1719	1.00214			10.1721	2.23717			10.1715	4.70007			10.169	7.52288
10.179	1.36849			10.1739	3.94417			10.1773	10.9804			10.179	20.9477			10.1754	0.977889			10.179	4.06345			10.1756	9.42083			10.1773	13.8126			10.1785	0.996217			10.1788	2.2139			10.1781	4.64279			10.1756	7.42529
10.1856	1.39545			10.1806	4.02463			10.1839	11.1742			10.1856	21.2223			10.1821	0.986494			10.1856	4.05759			10.1823	9.33624			10.1839	13.6575			10.1852	0.989944			10.1854	2.19078			10.1848	4.58585			10.1823	7.32885
10.1923	1.42112			10.1873	4.10127			10.1906	11.3554			10.1923	21.4757			10.1888	0.995025			10.1923	4.04987			10.189	9.24994			10.1906	13.5019			10.1919	0.983559			10.1921	2.1679			10.1914	4.52957			10.189	7.23328
10.1989	1.44566			10.1939	4.17384			10.1973	11.5242			10.1989	21.7077			10.1954	1.00353			10.1989	4.04041			10.1956	9.16179			10.1973	13.346			10.1985	0.977203			10.1988	2.14509			10.1981	4.47375			10.1956	7.13877
10.2056	1.46917			10.2006	4.24244			10.204	11.6809			10.2056	21.9178			10.2021	1.01114			10.2056	4.02925			10.2023	9.07224			10.204	13.1904			10.2052	0.970669			10.2054	2.12263			10.2048	4.41872			10.2023	7.04571
10.2123	1.49184			10.2073	4.30661			10.2106	11.8255			10.2123	22.1059			10.2088	1.01771			10.2123	4.01605			10.2089	8.98115			10.2106	13.0354			10.2119	0.96377			10.2121	2.10099			10.2114	4.36484			10.2089	6.95438
10.2189	1.5133			10.214	4.36593			10.2173	11.9586			10.2189	22.2729			10.2154	1.02346			10.2189	4.0008			10.2156	8.88872			10.2173	12.8808			10.2185	0.957094			10.2188	2.07963			10.2181	4.31233			10.2156	6.86447
10.2256	1.53341			10.2206	4.42048			10.224	12.0803			10.2256	22.4196			10.2221	1.02863			10.2256	3.98387			10.2223	8.79484			10.224	12.7262			10.2252	0.950702			10.2254	2.05848			10.2248	4.26076			10.2223	6.77551
10.2323	1.55224			10.2273	4.47073			10.2306	12.1909			10.2323	22.546			10.2287	1.03258			10.2323	3.96544			10.2289	8.70001			10.2306	12.5717			10.2319	0.944205			10.2321	2.0375			10.2315	4.20931			10.2289	6.68776
10.239	1.56983			10.234	4.51646			10.2373	12.2907			10.239	22.6525			10.2354	1.03503			10.239	3.94524			10.2356	8.60449			10.2373	12.4179			10.2385	0.937708			10.2387	2.01612			10.2381	4.15801			10.2356	6.60146
10.2456	1.5862			10.2406	4.5573			10.2439	12.3792			10.2456	22.7403			10.2421	1.03658			10.2456	3.92321			10.2423	8.50812			10.2439	12.2646			10.2452	0.931419			10.2454	1.9938			10.2448	4.10649			10.2423	6.51646
10.2523	1.60105			10.2473	4.59378			10.2506	12.4561			10.2523	22.8105			10.2487	1.03775			10.2523	3.89992			10.249	8.41122			10.2506	12.112			10.2519	0.92566			10.2521	1.97101			10.2515	4.0549			10.249	6.43301
10.259	1.61425			10.2539	4.62632			10.2573	12.5207			10.259	22.8629			10.2554	1.03877			10.259	3.87524			10.2556	8.31375			10.2573	11.96			10.2585	0.919782			10.2587	1.94877			10.2581	4.0032			10.2556	6.35096
10.2656	1.62552			10.2606	4.65451			10.2639	12.5741			10.2656	22.8976			10.2621	1.03949			10.2656	3.84878			10.2623	8.21634			10.2639	11.8083			10.2652	0.913344			10.2654	1.92697			10.2648	3.95174			10.2623	6.27033
10.2723	1.63483			10.2673	4.67784			10.2706	12.6165			10.2723	22.9155			10.2688	1.03969			10.2723	3.82026			10.269	8.11901			10.2706	11.657			10.2719	0.9069			10.2721	1.90522			10.2714	3.9015			10.269	6.19084
10.279	1.64192			10.2739	4.69672			10.2773	12.648			10.279	22.9174			10.2754	1.03927			10.279	3.79047			10.2756	8.02202			10.2773	11.5066			10.2785	0.900596			10.2788	1.88409			10.2781	3.8528			10.2756	6.11234
10.2856	1.64683			10.2806	4.7118			10.284	12.6689			10.2856	22.9034			10.2821	1.03831			10.2856	3.76017			10.2823	7.9255			10.284	11.3577			10.2852	0.894211			10.2854	1.86352			10.2848	3.80559			10.2823	6.03459
10.2923	1.64986			10.2873	4.7229			10.2906	12.6798			10.2923	22.8735			10.2888	1.03676			10.2923	3.72902			10.2889	7.82892			10.2906	11.2103			10.2919	0.887327			10.2921	1.84315			10.2914	3.75929			10.2889	5.95736
10.2989	1.65167			10.294	4.72989			10.2973	12.6817			10.2989	22.8282			10.2954	1.03424			10.2989	3.69684			10.2956	7.73223			10.2973	11.0639			10.2985	0.879943			10.2988	1.82242			10.2981	3.7135			10.2956	5.88074
10.3056	1.6523			10.3006	4.73294			10.304	12.6747			10.3056	22.7678			10.3021	1.03086			10.3056	3.66335			10.3023	7.63538			10.304	10.9183			10.3052	0.872746			10.3054	1.80204			10.3048	3.66832			10.3023	5.80513
10.3123	1.65201			10.3073	4.73253			10.3106	12.659			10.3123	22.6933			10.3087	1.02704			10.3123	3.62922			10.3089	7.53855			10.3106	10.7737			10.3119	0.865422			10.3121	1.78212			10.3115	3.62381			10.3089	5.73047
10.3189	1.65124			10.314	4.72872			10.3173	12.6342			10.3189	22.6052			10.3154	1.02302			10.3189	3.59411			10.3156	7.44143			10.3173	10.6297			10.3185	0.857718			10.3187	1.76223			10.3181	3.57956			10.3156	5.65672
10.3256	1.65021			10.3206	4.7216			10.3239	12.6005			10.3256	22.5041			10.3221	1.01848			10.3256	3.5578			10.3223	7.34369			10.3239	10.486			10.3252	0.84947			10.3254	1.74231			10.3248	3.53535			10.3223	5.58434
10.3323	1.64826			10.3273	4.7114			10.3306	12.5587			10.3323	22.3903			10.3287	1.0133			10.3323	3.52057			10.329	7.24579			10.3306	10.3428			10.3319	0.841029			10.3321	1.7223			10.3315	3.49139			10.329	5.51336
10.339	1.64432			10.3339	4.69791			10.3373	12.5095			10.339	22.2644			10.3354	1.00786			10.339	3.48265			10.3356	7.14809			10.3373	10.2007			10.3385	0.832893			10.3387	1.70196			10.3381	3.44809			10.3356	5.44343
10.3456	1.63873			10.3406	4.68118			10.3439	12.4532			10.3456	22.1272			10.3421	1.00194			10.3456	3.44466			10.3423	7.05055			10.3439	10.0601			10.3452	0.824779			10.3454	1.6807			10.3448	3.4057			10.3423	5.37401
10.3523	1.63168			10.3473	4.66149			10.3506	12.39			10.3523	21.9787			10.3488	0.995025			10.3523	3.40635			10.349	6.95314			10.3506	9.92124			10.3519	0.816554			10.3521	1.65918			10.3514	3.36371			10.349	5.30533
10.359	1.62303			10.3539	4.63907			10.3573	12.3201			10.359	21.8191			10.3554	0.98706			10.359	3.36753			10.3556	6.85614			10.3573	9.78375			10.3585	0.808209			10.3588	1.6383			10.3581	3.32225			10.3556	5.23774
10.3656	1.6126			10.3606	4.6137			10.364	12.2443			10.3656	21.6487			10.3621	0.978582			10.3656	3.32793			10.3623	6.76008			10.364	9.64742			10.3652	0.799946			10.3654	1.61856			10.3648	3.28137			10.3623	5.17111
10.3723	1.60125			10.3673	4.58542			10.3706	12.1621			10.3723	21.4678			10.3688	0.970095			10.3723	3.28755			10.3689	6.66514			10.3706	9.51256			10.3719	0.791818			10.3721	1.59992			10.3714	3.24122			10.3689	5.10528
10.3789	1.59036			10.374	4.55482			10.3773	12.0737			10.3789	21.2773			10.3754	0.961527			10.3789	3.24707			10.3756	6.57129			10.3773	9.37923			10.3785	0.783488			10.3788	1.58203			10.3781	3.20184			10.3756	5.04061
10.3856	1.57984			10.3806	4.52226			10.384	11.9796			10.3856	21.078			10.3821	0.95278			10.3856	3.20638			10.3823	6.47862			10.384	9.24716			10.3852	0.774838			10.3854	1.5642			10.3848	3.16291			10.3823	4.97733
10.3923	1.56867			10.3873	4.48748			10.3906	11.8801			10.3923	20.8705			10.3887	0.943929			10.3923	3.16522			10.3889	6.38656			10.3906	9.11648			10.3919	0.76621			10.3921	1.54585			10.3915	3.12444			10.3889	4.91558
10.3989	1.55663			10.394	4.45067			10.3973	11.7757			10.3989	20.6553			10.3954	0.935011			10.3989	3.12392			10.3956	6.29503			10.3973	8.98729			10.3985	0.758156			10.3987	1.5271			10.3981	3.08624			10.3956	4.85509
10.4056	1.54358			10.4006	4.41249			10.404	11.6665			10.4056	20.4333			10.4021	0.925966			10.4056	3.08307			10.4023	6.20388			10.404	8.85984			10.4052	0.750884			10.4054	1.50858			10.4048	3.04845			10.4023	4.79534
10.4123	1.52978			10.4073	4.37306			10.4106	11.5528			10.4123	20.2046			10.4087	0.916362			10.4123	3.04287			10.409	6.1132			10.4106	8.73345			10.4119	0.743642			10.4121	1.49006			10.4115	3.01116			10.409	4.73617
10.419	1.51463			10.4139	4.33186			10.4173	11.4348			10.419	19.9697			10.4154	0.90605			10.419	3.00239			10.4156	6.02286			10.4173	8.60782			10.4185	0.736266			10.4187	1.47154			10.4181	2.97394			10.4156	4.67767
10.4256	1.49844			10.4206	4.28868			10.4239	11.3121			10.4256	19.7289			10.4221	0.895493			10.4256	2.9614			10.4223	5.93262			10.4239	8.48313			10.4252	0.72889			10.4254	1.45303			10.4248	2.93683			10.4223	4.62006
10.4323	1.48195			10.4273	4.24387			10.4306	11.1848			10.4323	19.4827			10.4288	0.88504			10.4323	2.91998			10.429	5.84298			10.4306	8.35972			10.4319	0.721581			10.4321	1.43509			10.4314	2.90013			10.429	4.5633
10.439	1.46532			10.4339	4.19747			10.4373	11.0534			10.439	19.2313			10.4354	0.87481			10.439	2.87837			10.4356	5.7544			10.4373	8.23808			10.4385	0.713676			10.4388	1.41738			10.4381	2.86443			10.4356	4.50699
10.4456	1.44853			10.4406	4.1492			10.4439	10.9187			10.4456	18.9751			10.4421	0.864334			10.4456	2.83626			10.4423	5.66739			10.4439	8.11816			10.4452	0.704907			10.4454	1.39963			10.4448	2.82958			10.4423	4.4514
10.4523	1.43139			10.4473	4.099			10.4506	10.7815			10.4523	18.7144			10.4488	0.853568			10.4523	2.79354			10.4489	5.58174			10.4506	8.00036			10.4519	0.696093			10.4521	1.3819			10.4514	2.79509			10.4489	4.39667
10.4589	1.4139			10.454	4.04755			10.4573	10.6418			10.4589	18.4504			10.4554	0.84278			10.4589	2.75076			10.4556	5.49747			10.4573	7.88455			10.4585	0.687979			10.4588	1.36427			10.4581	2.76075			10.4556	4.34252
10.4656	1.3962			10.4606	3.99555			10.464	10.5002			10.4656	18.1836			10.4621	0.831701			10.4656	2.70838			10.4623	5.41452			10.464	7.77048			10.4652	0.680588			10.4654	1.34718			10.4648	2.72708			10.4623	4.28879
10.4723	1.37819			10.4673	3.94308			10.4706	10.3564			10.4723	17.9142			10.4688	0.820488			10.4723	2.66679			10.4689	5.33275			10.4706	7.65751			10.4719	0.673331			10.4721	1.33053			10.4715	2.69385			10.4689	4.23566
10.4789	1.35987			10.474	3.89013			10.4773	10.2105			10.4789	17.6421			10.4754	0.809185			10.4789	2.62593			10.4756	5.25166			10.4773	7.54526			10.4785	0.665762			10.4787	1.31454			10.4781	2.66092			10.4756	4.18389
10.4856	1.34116			10.4806	3.83655			10.484	10.0624			10.4856	17.368			10.4821	0.797987			10.4856	2.58566			10.4823	5.17062			10.484	7.43427			10.4852	0.657789			10.4854	1.29873			10.4848	2.6282			10.4823	4.1334
10.4923	1.32183			10.4873	3.78243			10.4906	9.91256			10.4923	17.0927			10.4887	0.78658			10.4923	2.54574			10.489	5.09002			10.4906	7.32457			10.4919	0.649624			10.4921	1.28309			10.4915	2.59591			10.489	4.08392
10.499	1.30231			10.4939	3.72796			10.4973	9.76145			10.499	16.8167			10.4954	0.7746			10.499	2.50601			10.4956	5.01031			10.4973	7.21625			10.4985	0.641234			10.4987	1.26769			10.4981	2.56446			10.4956	4.03551
10.5056	1.28242			10.5006	3.67286			10.5039	9.6093			10.5056	16.5401			10.5021	0.762239			10.5056	2.46635			10.5023	4.93165			10.5039	7.10916			10.5052	0.632606			10.5054	1.25264			10.5048	2.53329			10.5023	3.98833
10.5123	1.26226			10.5073	3.61684			10.5106	9.45695			10.5123	16.2635			10.5087	0.749506			10.5123	2.42669			10.509	4.85373			10.5106	7.00383			10.5119	0.623845			10.5121	1.23762			10.5114	2.50239			10.509	3.94196
10.519	1.24191			10.5139	3.55993			10.5173	9.30426			10.519	15.9875			10.5154	0.736549			10.519	2.38696			10.5156	4.77665			10.5173	6.90061			10.5185	0.615709			10.5188	1.22229			10.5181	2.47158			10.5156	3.89568
10.5256	1.22197			10.5206	3.5025			10.5239	9.15099			10.5256	15.7122			10.5221	0.723571			10.5256	2.3477			10.5223	4.70105			10.5239	6.799			10.5252	0.60834			10.5254	1.20686			10.5248	2.44118			10.5223	3.84941
10.5323	1.20249			10.5273	3.44526			10.5306	8.99714			10.5323	15.4374			10.5288	0.711367			10.5323	2.30899			10.529	4.62692			10.5306	6.69875			10.5319	0.601344			10.5321	1.19174			10.5314	2.41166			10.529	3.80343
10.5389	1.18294			10.534	3.3878			10.5373	8.8428			10.5389	15.1633			10.5354	0.700042			10.5389	2.27091			10.5356	4.5535			10.5373	6.6001			10.5385	0.594355			10.5388	1.17715			10.5381	2.38302			10.5356	3.75822
10.5456	1.16292			10.5406	3.3301			10.544	8.68841			10.5456	14.8901			10.5421	0.689201			10.5456	2.2333			10.5423	4.48052			10.544	6.50316			10.5452	0.587173			10.5454	1.16263			10.5448	2.35534			10.5423	3.71361
10.5523	1.14279			10.5473	3.27245			10.5506	8.53384			10.5523	14.6182			10.5488	0.678651			10.5523	2.19645			10.5489	4.40873			10.5506	6.40735			10.5519	0.580028			10.5521	1.14799			10.5515	2.32817			10.5489	3.66956
10.5589	1.1227			10.554	3.21487			10.5573	8.38			10.5589	14.3485			10.5554	0.668012			10.5589	2.1604			10.5556	4.33849			10.5573	6.3122			10.5585	0.57245			10.5587	1.13305			10.5581	2.30123			10.5556	3.62578
10.5656	1.10257			10.5606	3.15786			10.564	8.22743			10.5656	14.0811			10.5621	0.657178			10.5656	2.12498			10.5623	4.26957			10.564	6.21775			10.5652	0.56497			10.5654	1.11817			10.5648	2.2746			10.5623	3.5825
10.5723	1.08258			10.5673	3.10121			10.5706	8.07612			10.5723	13.8159			10.5687	0.64563			10.5723	2.09001			10.5689	4.20129			10.5706	6.12427			10.5719	0.557996			10.5721	1.10348			10.5715	2.24809			10.5689	3.53999
10.579	1.06296			10.5739	3.04505			10.5773	7.92641			10.579	13.5527			10.5754	0.633791			10.579	2.05507			10.5756	4.13413			10.5773	6.03171			10.5785	0.551529			10.5787	1.08892			10.5781	2.22173			10.5756	3.49838
10.5856	1.04404			10.5806	2.98941			10.5839	7.77809			10.5856	13.2921			10.5821	0.622354			10.5856	2.01994			10.5823	4.06852			10.5839	5.94059			10.5852	0.545338			10.5854	1.07442			10.5848	2.19572			10.5823	3.45758
10.5923	1.02528			10.5873	2.93402			10.5906	7.63125			10.5923	13.0346			10.5887	0.611275			10.5923	1.98442			10.589	4.0039			10.5906	5.85148			10.5919	0.5389			10.5921	1.0599			10.5915	2.17053			10.589	3.41731
10.599	1.00622			10.5939	2.8791			10.5973	7.48531			10.599	12.78			10.5954	0.600405			10.599	1.94896			10.5956	3.9399			10.5973	5.76456			10.5985	0.532478			10.5988	1.04579			10.5981	2.14609			10.5956	3.37785
10.6056	0.986651			10.6006	2.82421			10.6039	7.34053			10.6056	12.5287			10.6021	0.589758			10.6056	1.9139			10.6023	3.87628			10.6039	5.67939			10.6052	0.525512			10.6054	1.03208			10.6048	2.12204			10.6023	3.33913
10.6123	0.967078			10.6073	2.76977			10.6106	7.1973			10.6123	12.2812			10.6088	0.579379			10.6123	1.87963			10.609	3.81366			10.6106	5.59577			10.6119	0.517748			10.6121	1.01884			10.6114	2.09808			10.609	3.30141
10.6189	0.948086			10.614	2.71634			10.6173	7.05578			10.6189	12.0379			10.6154	0.569023			10.6189	1.84671			10.6156	3.75197			10.6173	5.51338			10.6185	0.509642			10.6188	1.0064			10.6181	2.07438			10.6156	3.26446
10.6256	0.929743			10.6206	2.66384			10.624	6.91613			10.6256	11.7981			10.6221	0.558265			10.6256	1.8152			10.6223	3.69129			10.624	5.43217			10.6252	0.501804			10.6254	0.994578			10.6248	2.05065			10.6223	3.22815
10.6323	0.912026			10.6273	2.61219			10.6306	6.77871			10.6323	11.5616			10.6288	0.547417			10.6323	1.78479			10.6289	3.63165			10.6306	5.352			10.6319	0.494614			10.6321	0.983365			10.6314	2.02695			10.6289	3.19207
10.6389	0.895083			10.634	2.56098			10.6373	6.64373			10.6389	11.3284			10.6354	0.537179			10.6389	1.75472			10.6356	3.57304			10.6373	5.27335			10.6385	0.487722			10.6387	0.972196			10.6381	2.0037			10.6356	3.15624
10.6456	0.878982			10.6406	2.51079			10.644	6.51067			10.6456	11.0987			10.6421	0.52736			10.6456	1.72446			10.6423	3.51542			10.644	5.19617			10.6452	0.48095			10.6454	0.960849			10.6448	1.98101			10.6423	3.12102
10.6523	0.862658			10.6473	2.46105			10.6506	6.37907			10.6523	10.8721			10.6487	0.517935			10.6523	1.69389			10.6489	3.4589			10.6506	5.12001			10.6519	0.474654			10.6521	0.949107			10.6515	1.95877			10.6489	3.08646
10.659	0.845455			10.654	2.41122			10.6573	6.24882			10.659	10.6495			10.6554	0.508524			10.659	1.66336			10.6556	3.40364			10.6573	5.04515			10.6585	0.468597			10.6587	0.936918			10.6581	1.93669			10.6556	3.05228
10.6656	0.827581			10.6606	2.3616			10.6639	6.12017			10.6656	10.4312			10.6621	0.499338			10.6656	1.6333			10.6623	3.34921			10.6639	4.97162			10.6652	0.46286			10.6654	0.924766			10.6648	1.91505			10.6623	3.0182
10.6723	0.809997			10.6673	2.31301			10.6706	5.99307			10.6723	10.2174			10.6687	0.490226			10.6723	1.60401			10.669	3.29565			10.6706	4.89957			10.6719	0.457354			10.6721	0.912778			10.6715	1.89412			10.669	2.98481
10.679	0.793509			10.6739	2.26643			10.6773	5.8679			10.679	10.0079			10.6754	0.480995			10.679	1.57579			10.6756	3.24351			10.6773	4.82822			10.6785	0.452451			10.6788	0.901289			10.6781	1.87384			10.6756	2.95234
10.6856	0.777543			10.6806	2.22129			10.6839	5.74534			10.6856	9.80242			10.6821	0.471972			10.6856	1.54872			10.6823	3.19277			10.6839	4.75751			10.6852	0.44819			10.6854	0.890151			10.6848	1.85384			10.6823	2.92064
10.6923	0.761852			10.6873	2.17741			10.6906	5.62584			10.6923	9.6013			10.6888	0.463471			10.6923	1.52253			10.689	3.14288			10.6906	4.68797			10.6919	0.443913			10.6921	0.879198			10.6914	1.83411			10.689	2.88906
10.6989	0.746302			10.6939	2.13432			10.6973	5.50909			10.6989	9.40406			10.6954	0.455789			10.6989	1.49647			10.6956	3.09329			10.6973	4.6194			10.6985	0.439174			10.6988	0.868306			10.6981	1.81443			10.6956	2.85763
10.7056	0.731274			10.7006	2.09181			10.704	5.39461			10.7056	9.21039			10.7021	0.448525			10.7056	1.47042			10.7023	3.04434			10.704	4.55198			10.7052	0.433616			10.7054	0.857756			10.7048	1.79457			10.7023	2.82679
10.7123	0.716478			10.7073	2.04962			10.7106	5.28242			10.7123	9.02006			10.7088	0.441223			10.7123	1.44462			10.7089	2.99612			10.7106	4.48561			10.7119	0.427805			10.7121	0.847764			10.7114	1.77414			10.7089	2.79644
10.7189	0.701301			10.714	2.00769			10.7173	5.17275			10.7189	8.83316			10.7154	0.433557			10.7189	1.41904			10.7156	2.9484			10.7173	4.4202			10.7185	0.421777			10.7188	0.837974			10.7181	1.75335			10.7156	2.76641
10.7256	0.686362			10.7206	1.96619			10.724	5.06539			10.7256	8.64979			10.7221	0.425577			10.7256	1.39337			10.7223	2.90104			10.724	4.35617			10.7252	0.415623			10.7254	0.828043			10.7248	1.73293			10.7223	2.73675
10.7323	0.67234			10.7273	1.92539			10.7306	4.95996			10.7323	8.4703			10.7287	0.4173			10.7323	1.36817			10.7289	2.85454			10.7306	4.29323			10.7319	0.409521			10.7321	0.818014			10.7315	1.71309			10.7289	2.70744
10.739	0.659525			10.734	1.88567			10.7373	4.85647			10.739	8.29465			10.7354	0.408933			10.739	1.34385			10.7356	2.80897			10.7373	4.23158			10.7385	0.403851			10.7387	0.808246			10.7381	1.69406			10.7356	2.67827
10.7456	0.647292			10.7406	1.8473			10.7439	4.75532			10.7456	8.12274			10.7421	0.400819			10.7456	1.32075			10.7423	2.7644			10.7439	4.1706			10.7452	0.398919			10.7454	0.798486			10.7448	1.67586			10.7423	2.64908
10.7523	0.635244			10.7473	1.80992			10.7506	4.65671			10.7523	7.95446			10.7487	0.393443			10.7523	1.29834			10.749	2.72077			10.7506	4.11012			10.7519	0.394449			10.7521	0.788741			10.7515	1.65865			10.749	2.62005
10.759	0.623263			10.7539	1.77315			10.7573	4.56021			10.759	7.7903			10.7554	0.387006			10.759	1.27653			10.7556	2.67821			10.7573	4.05075			10.7585	0.390261			10.7587	0.779271			10.7581	1.64147			10.7556	2.59181
10.7656	0.611238			10.7606	1.73668			10.7639	4.46599			10.7656	7.63054			10.7621	0.381276			10.7656	1.2555			10.7623	2.6371			10.7639	3.99242			10.7652	0.386052			10.7654	0.770316			10.7648	1.62368			10.7623	2.56425
10.7723	0.599183			10.7673	1.70078			10.7706	4.37409			10.7723	7.47492			10.7688	0.375621			10.7723	1.23474			10.769	2.59668			10.7706	3.93528			10.7719	0.381805			10.7721	0.76177			10.7714	1.60561			10.769	2.53731
10.779	0.587292			10.7739	1.66591			10.7773	4.28448			10.779	7.32315			10.7754	0.369549			10.779	1.21447			10.7756	2.55688			10.7773	3.87952			10.7785	0.377327			10.7788	0.753038			10.7781	1.58805			10.7756	2.5107
10.7856	0.575736			10.7806	1.63206			10.784	4.19667			10.7856	7.17504			10.7821	0.362858			10.7856	1.19428			10.7823	2.51763			10.784	3.82527			10.7852	0.372671			10.7854	0.74432			10.7848	1.57105			10.7823	2.48467
10.7923	0.564642			10.7873	1.59921			10.7906	4.1109			10.7923	7.03021			10.7888	0.355788			10.7923	1.17423			10.7889	2.47942			10.7906	3.77203			10.7919	0.367716			10.7921	0.73579			10.7914	1.55402			10.7889	2.45935
10.7989	0.553921			10.794	1.56748			10.7973	4.0277			10.7989	6.88842			10.7954	0.348516			10.7989	1.15421			10.7956	2.44203			10.7973	3.71922			10.7985	0.362776			10.7988	0.727504			10.7981	1.53762			10.7956	2.43429
10.8056	0.543572			10.8006	1.53735			10.804	3.94684			10.8056	6.7497			10.8021	0.341251			10.8056	1.13442			10.8023	2.40496			10.804	3.66688			10.8052	0.358284			10.8054	0.719503			10.8048	1.52232			10.8023	2.40952
10.8123	0.533804			10.8073	1.50869			10.8106	3.86763			10.8123	6.61423			10.8087	0.334524			10.8123	1.11531			10.8089	2.36892			10.8106	3.6156			10.8119	0.354342			10.8121	0.711836			10.8115	1.50768			10.8089	2.38515
10.8189	0.524513			10.814	1.48077			10.8173	3.7901			10.8189	6.48208			10.8154	0.328571			10.8189	1.09667			10.8156	2.33411			10.8173	3.56522			10.8185	0.350885			10.8187	0.704572			10.8181	1.49281			10.8156	2.36151
10.8256	0.515446			10.8206	1.45306			10.8239	3.71482			10.8256	6.3531			10.8221	0.323161			10.8256	1.0784			10.8223	2.30021			10.8239	3.51548			10.8252	0.347227			10.8254	0.697181			10.8248	1.47751			10.8223	2.33802
10.8323	0.506163			10.8273	1.42533			10.8306	3.64168			10.8323	6.22769			10.8287	0.317872			10.8323	1.06048			10.829	2.2663			10.8306	3.46673			10.8319	0.342965			10.8321	0.689328			10.8315	1.4622			10.829	2.31434
10.839	0.49676			10.8339	1.39783			10.8373	3.56989			10.839	6.10559			10.8354	0.312977			10.839	1.04327			10.8356	2.23252			10.8373	3.41894			10.8385	0.338301			10.8387	0.681102			10.8381	1.44693			10.8356	2.29068
10.8456	0.487477			10.8406	1.37083			10.8439	3.49881			10.8456	5.98648			10.8421	0.30864			10.8456	1.02648			10.8423	2.19961			10.8439	3.37223			10.8452	0.333562			10.8454	0.67246			10.8448	1.43187			10.8423	2.26719
10.8523	0.478402			10.8473	1.34409			10.8506	3.42914			10.8523	5.86994			10.8488	0.304401			10.8523	1.00987			10.849	2.16742			10.8506	3.326			10.8519	0.329047			10.8521	0.663541			10.8514	1.41724			10.849	2.24419
10.859	0.469543			10.8539	1.31783			10.8573	3.36129			10.859	5.75572			10.8554	0.299685			10.859	0.99349			10.8556	2.13583			10.8573	3.28016			10.8585	0.324659			10.8588	0.655055			10.8581	1.40277			10.8556	2.22172
10.8656	0.461005			10.8606	1.29249			10.864	3.29525			10.8656	5.64388			10.8621	0.295155			10.8656	0.977524			10.8623	2.10466			10.864	3.23512			10.8652	0.320502			10.8654	0.647701			10.8648	1.38844			10.8623	2.19996
10.8723	0.452988			10.8673	1.26881			10.8706	3.23079			10.8723	5.53487			10.8688	0.29096			10.8723	0.962324			10.8689	2.07458			10.8706	3.1909			10.8719	0.316814			10.8721	0.641443			10.8714	1.37438			10.8689	2.17856
10.8789	0.445709			10.874	1.24635			10.8773	3.16796			10.8789	5.42964			10.8754	0.286497			10.8789	0.947639			10.8756	2.04539			10.8773	3.14789			10.8785	0.313222			10.8788	0.635609			10.8781	1.36075			10.8756	2.1572
10.8856	0.438586			10.8806	1.22452			10.884	3.10726			10.8856	5.32842			10.8821	0.281096			10.8856	0.933506			10.8823	2.01657			10.884	3.1057			10.8852	0.309803			10.8854	0.629865			10.8848	1.34744			10.8823	2.13552
10.8923	0.431202			10.8873	1.20349			10.8906	3.04863			10.8923	5.23023			10.8887	0.275262			10.8923	0.919819			10.8889	1.98761			10.8906	3.06446			10.8919	0.306301			10.8921	0.624098			10.8915	1.33424			10.8889	2.11361
10.8989	0.423297			10.894	1.18376			10.8973	2.992			10.8989	5.13437			10.8954	0.270136			10.8989	0.906572			10.8956	1.95897			10.8973	3.02428			10.8985	0.303172			10.8987	0.61778			10.8981	1.32125			10.8956	2.09172
10.9056	0.415161			10.9006	1.16515			10.904	2.93722			10.9056	5.04105			10.9021	0.265621			10.9056	0.893474			10.9023	1.93133			10.904	2.98489			10.9052	0.300385			10.9054	0.610508			10.9048	1.30814			10.9023	2.07034
10.9123	0.407353			10.9073	1.14689			10.9106	2.88393			10.9123	4.9504			10.9087	0.261717			10.9123	0.88039			10.909	1.90437			10.9106	2.94622			10.9119	0.298351			10.9121	0.602826			10.9115	1.29504			10.909	2.04979
10.919	0.400126			10.9139	1.12887			10.9173	2.83191			10.919	4.86173			10.9154	0.258401			10.919	0.867225			10.9156	1.87781			10.9173	2.90805			10.9185	0.296712			10.9187	0.595272			10.9181	1.28216			10.9156	2.03001
10.9256	0.39386			10.9206	1.1107			10.9239	2.7813			10.9256	4.77429			10.9221	0.255838			10.9256	0.854157			10.9223	1.85177			10.9239	2.87079			10.9252	0.2947			10.9254	0.588439			10.9248	1.26954			10.9223	2.01109
10.9323	0.388362			10.9273	1.09217			10.9306	2.73238			10.9323	4.6887			10.9288	0.253633			10.9323	0.841193			10.929	1.82666			10.9306	2.83441			10.9319	0.292234			10.9321	0.58201			10.9314	1.25732			10.929	1.99246
10.939	0.383765			10.9339	1.07326			10.9373	2.68513			10.939	4.60546			10.9354	0.251189			10.939	0.8284			10.9356	1.80198			10.9373	2.79877			10.9385	0.289343			10.9388	0.57587			10.9381	1.24547			10.9356	1.9741
10.9456	0.379808			10.9406	1.05472			10.9439	2.63897			10.9456	4.52469			10.9421	0.248276			10.9456	0.816159			10.9423	1.77733			10.9439	2.76379			10.9452	0.286333			10.9454	0.570387			10.9448	1.23437			10.9423	1.9559
10.9523	0.375606			10.9473	1.03725			10.9506	2.5934			10.9523	4.44599			10.9488	0.245057			10.9523	0.804469			10.9489	1.75311			10.9506	2.72921			10.9519	0.282884			10.9521	0.565216			10.9514	1.22335			10.9489	1.93778
10.9589	0.370666			10.954	1.02063			10.9573	2.54882			10.9589	4.36933			10.9554	0.242002			10.9589	0.793412			10.9556	1.73002			10.9573	2.69506			10.9585	0.279136			10.9588	0.560336			10.9581	1.21222			10.9556	1.91981
10.9656	0.365019			10.9606	1.00475			10.964	2.50553			10.9656	4.2951			10.9621	0.23929			10.9656	0.782892			10.9623	1.70787			10.964	2.66123			10.9652	0.275537			10.9654	0.555366			10.9648	1.20115			10.9623	1.90195
10.9723	0.359438			10.9673	0.989348			10.9706	2.46377			10.9723	4.22315			10.9688	0.236914			10.9723	0.772975			10.9689	1.68611			10.9706	2.62767			10.9719	0.27214			10.9721	0.550471			10.9715	1.19035			10.9689	1.88433
10.9789	0.354007			10.974	0.974327			10.9773	2.42299			10.9789	4.15359			10.9754	0.234671			10.9789	0.76364			10.9756	1.66457			10.9773	2.594			10.9785	0.268944			10.9787	0.545733			10.9781	1.17931			10.9756	1.86659
10.9856	0.348285			10.9806	0.959218			10.984	2.38312			10.9856	4.08591			10.9821	0.232399			10.9856	0.754215			10.9823	1.6436			10.984	2.56053			10.9852	0.265852			10.9854	0.540666			10.9848	1.1678			10.9823	1.84853
10.9923	0.342704			10.9873	0.944175			10.9906	2.34471			10.9923	4.0196			10.9887	0.230022			10.9923	0.744447			10.989	1.62288			10.9906	2.52773			10.9919	0.26308			10.9921	0.535294			10.9915	1.15636			10.989	1.83073
10.999	0.337601			10.9939	0.929654			10.9973	2.30742			10.999	3.95453			10.9954	0.227123			10.999	0.734329			10.9956	1.60187			10.9973	2.4959			10.9985	0.26089			10.9987	0.52961			10.9981	1.14503			10.9956	1.81334
11.0056	0.333294			11.0006	0.915609			11.0039	2.27091			11.0056	3.89079			11.0021	0.223689			11.0056	0.724182			11.0023	1.5805			11.0039	2.46476			11.0052	0.259154			11.0054	0.523999			11.0048	1.13352			11.0023	1.79662
11.0123	0.329345			11.0073	0.901677			11.0106	2.23466			11.0123	3.82882			11.0087	0.22018			11.0123	0.714116			11.009	1.5592			11.0106	2.43423			11.0119	0.257425			11.0121	0.518776			11.0114	1.12168			11.009	1.78048
11.019	0.325575			11.0139	0.887997			11.0173	2.19904			11.019	3.76856			11.0154	0.216976			11.019	0.70402			11.0156	1.53864			11.0173	2.4045			11.0185	0.255257			11.0188	0.513896			11.0181	1.11054			11.0156	1.76504
11.0256	0.322156			11.0206	0.875354			11.0239	2.16442			11.0256	3.71002			11.0221	0.214204			11.0256	0.69429			11.0223	1.51879			11.0239	2.37566			11.0252	0.252917			11.0254	0.50915			11.0248	1.1001			11.0223	1.74992
11.0323	0.318855			11.0273	0.863709			11.0306	2.13089			11.0323	3.65315			11.0288	0.211351			11.0323	0.685044			11.029	1.49984			11.0306	2.34778			11.0319	0.250638			11.0321	0.504211			11.0314	1.08999			11.029	1.73469
11.0389	0.315353			11.034	0.852667			11.0373	2.09878			11.0389	3.59778			11.0354	0.208288			11.0389	0.67658			11.0356	1.48171			11.0373	2.32077			11.0385	0.248492			11.0388	0.499003			11.0381	1.0801			11.0356	1.71929
11.0456	0.311352			11.0406	0.841707			11.044	2.06811			11.0456	3.54394			11.0421	0.205047			11.0456	0.668593			11.0423	1.46446			11.044	2.29438			11.0452	0.246085			11.0454	0.493363			11.0448	1.07074			11.0423	1.70372
11.0523	0.306971			11.0473	0.83147			11.0506	2.03876			11.0523	3.49181			11.0488	0.201836			11.0523	0.661194			11.0489	1.44786			11.0506	2.2682			11.0519	0.243776			11.0521	0.487432			11.0515	1.06187			11.0489	1.68803
11.0589	0.302419			11.054	0.821941			11.0573	2.01062			11.0589	3.44113			11.0554	0.198774			11.0589	0.654362			11.0556	1.43132			11.0573	2.24248			11.0585	0.241786			11.0587	0.481524			11.0581	1.05303			11.0556	1.67232
11.0656	0.298001			11.0606	0.812463			11.064	1.98332			11.0656	3.39141			11.0621	0.196137			11.0656	0.648193			11.0623	1.41464			11.064	2.21726			11.0652	0.240132			11.0654	0.476137			11.0648	1.04411			11.0623	1.65703
11.0723	0.293717			11.0673	0.802368			11.0706	1.95654			11.0723	3.34284			11.0687	0.194289			11.0723	0.64227			11.0689	1.39823			11.0706	2.19272			11.0719	0.238217			11.0721	0.471413			11.0715	1.03522			11.0689	1.64242
11.079	0.289775			11.0739	0.791878			11.0773	1.92985			11.079	3.29532			11.0754	0.193156			11.079	0.635922			11.0756	1.38261			11.0773	2.16851			11.0785	0.235915			11.0787	0.467218			11.0781	1.02612			11.0756	1.62829
11.0856	0.286229			11.0806	0.781946			11.0839	1.90303			11.0856	3.2489			11.0821	0.192173			11.0856	0.629298			11.0823	1.36762			11.0839	2.14469			11.0852	0.233732			11.0854	0.463463			11.0848	1.01678			11.0823	1.61434
11.0923	0.283204			11.0873	0.772387			11.0906	1.87637			11.0923	3.20314			11.0887	0.190653			11.0923	0.622362			11.089	1.35307			11.0906	2.12086			11.0919	0.231996			11.0921	0.45982			11.0915	1.0075			11.089	1.60051
11.099	0.280492			11.0939	0.762828			11.0973	1.84988			11.099	3.15829			11.0954	0.188664			11.099	0.615247			11.0956	1.33879			11.0973	2.09706			11.0985	0.230663			11.0988	0.455864			11.0981	0.998504			11.0956	1.58699
11.1056	0.27772			11.1006	0.753239			11.1039	1.82407			11.1056	3.11456			11.1021	0.186637			11.1056	0.607938			11.1023	1.32474			11.1039	2.07344			11.1052	0.229023			11.1054	0.451639			11.1048	0.990063			11.1023	1.57392
11.1123	0.274837			11.1073	0.743851			11.1106	1.79885			11.1123	3.07194			11.1088	0.184678			11.1123	0.601113			11.109	1.31024			11.1106	2.04972			11.1119	0.227265			11.1121	0.447571			11.1114	0.982173			11.109	1.56097
11.1189	0.272073			11.114	0.734709			11.1173	1.7745			11.1189	3.03075			11.1154	0.183024			11.1189	0.594921			11.1156	1.29487			11.1173	2.02622			11.1185	0.225283			11.1188	0.444002			11.1181	0.974789			11.1156	1.54793
11.1256	0.269338			11.1206	0.725895			11.124	1.75123			11.1256	2.99054			11.1221	0.181675			11.1256	0.588678			11.1223	1.27915			11.124	2.00314			11.1252	0.223383			11.1254	0.440732			11.1248	0.967585			11.1223	1.53455
11.1323	0.266269			11.1273	0.717923			11.1306	1.72891			11.1323	2.95095			11.1288	0.180535			11.1323	0.582621			11.1289	1.2636			11.1306	1.98108			11.1319	0.221588			11.1321	0.437342			11.1314	0.960372			11.1289	1.5209
11.1389	0.263058			11.134	0.710964			11.1373	1.70726			11.1389	2.91186			11.1354	0.179179			11.1389	0.576884			11.1356	1.24875			11.1373	1.95956			11.1385	0.219978			11.1387	0.434048			11.1381	0.952914			11.1356	1.50703
11.1456	0.260085			11.1406	0.704281			11.144	1.68576			11.1456	2.87375			11.1421	0.177577			11.1456	0.570945			11.1423	1.23468			11.144	1.93828			11.1452	0.218615			11.1454	0.430755			11.1448	0.944875			11.1423	1.49304
11.1523	0.257827			11.1473	0.697285			11.1506	1.66471			11.1523	2.8369			11.1487	0.176251			11.1523	0.564136			11.1489	1.22151			11.1506	1.91763			11.1519	0.217341			11.1521	0.427246			11.1515	0.936493			11.1489	1.47913
11.159	0.256099			11.154	0.690132			11.1573	1.64418			11.159	2.80089			11.1554	0.175089			11.159	0.557199			11.1556	1.2093			11.1573	1.89751			11.1585	0.216424			11.1587	0.423193			11.1581	0.928447			11.1556	1.4658
11.1656	0.254691			11.1606	0.682965			11.1639	1.62397			11.1656	2.76587			11.1621	0.174031			11.1656	0.551023			11.1623	1.19752			11.1639	1.87779			11.1652	0.215635			11.1654	0.418976			11.1648	0.920787			11.1623	1.45325
11.1723	0.253737			11.1673	0.675485			11.1706	1.60377			11.1723	2.73211			11.1687	0.172943			11.1723	0.54504			11.169	1.18589			11.1706	1.85827			11.1719	0.214554			11.1721	0.415348			11.1715	0.912972			11.169	1.4414
11.179	0.252634			11.1739	0.667691			11.1773	1.58413			11.179	2.69958			11.1754	0.171967			11.179	0.538774			11.1756	1.17394			11.1773	1.83959			11.1785	0.212923			11.1788	0.41227			11.1781	0.905015			11.1756	1.42963
11.1856	0.251479			11.1806	0.660382			11.1839	1.56578			11.1856	2.66766			11.1821	0.170596			11.1856	0.533149			11.1823	1.16174			11.1839	1.82161			11.1852	0.211142			11.1854	0.409238			11.1848	0.897534			11.1823	1.41768
11.1923	0.249863			11.1873	0.654012			11.1906	1.54886			11.1923	2.63596			11.1888	0.168674			11.1923	0.528783			11.189	1.14942			11.1906	1.80356			11.1919	0.209682			11.1921	0.406146			11.1914	0.890769			11.189	1.40569
11.1989	0.247687			11.1939	0.648223			11.1973	1.53281			11.1989	2.60471			11.1954	0.166602			11.1989	0.524901			11.1956	1.13722			11.1973	1.78494			11.1985	0.208519			11.1988	0.403292			11.1981	0.884004			11.1956	1.39403
11.2056	0.245154			11.2006	0.642508			11.204	1.51699			11.2056	2.57409			11.2021	0.164829			11.2056	0.520803			11.2023	1.12543			11.204	1.76618			11.2052	0.20726			11.2054	0.400588			11.2048	0.877142			11.2023	1.38262
11.2123	0.242189			11.2073	0.637278			11.2106	1.50162			11.2123	2.54384			11.2088	0.163466			11.2123	0.516713			11.2089	1.11399			11.2106	1.7479			11.2119	0.205986			11.2121	0.397645			11.2114	0.870079			11.2089	1.37118
11.2189	0.239357			11.214	0.63251			11.2173	1.48627			11.2189	2.51392			11.2154	0.162497			11.2189	0.513174			11.2156	1.10279			11.2173	1.72976			11.2185	0.204884			11.2188	0.3943			11.2181	0.862718			11.2156	1.35992
11.2256	0.236578			11.2206	0.627644			11.224	1.47054			11.2256	2.48463			11.2221	0.162102			11.2256	0.50962			11.2223	1.09203			11.224	1.7117			11.2252	0.203975			11.2254	0.391021			11.2248	0.855148			11.2223	1.3492
11.2323	0.234224			11.2273	0.622265			11.2306	1.45392			11.2323	2.45608			11.2287	0.161797			11.2323	0.505373			11.2289	1.08171			11.2306	1.69382			11.2319	0.202768			11.2321	0.387698			11.2315	0.847653			11.2289	1.33919
[truncated: 2,065 more rows]

## Sheet: peak elution times
		ID	concentration uM	peak elution time
IRE1 P108A	1	UK2410	10	10.279
	2	UK2410	6	10.304
	3	UK2410	2.5	10.3006
	4	UK2410	1	10.3056
IRE1 W125A	5	UK2411	10	9.91062
	6	UK2411	6	10.0156
	7	UK2411	2.5	10.1656
[truncated: 5 more rows]
