# Supplementary material for: Unstructured regions in IRE1α specify BiP-mediated destabilisation of the luminal domain dimer and repression of the UPR
Source: eLife. 2019 Dec 24;8:e50793. doi: 10.7554/eLife.50793 (PMC6996924; doi:10.7554/eLife.50793)
Supplement: Figure 2—figure supplement 1—source data 2. [file elife-50793-fig2-figsupp1-data2.xlsx]

## Sheet: rep 1
Melt Curves	2019-04-17							2018-07-19				2019-05-13						Melt Curve Derivative
Temperature	5 uM IRE1 wt 2042	5 uM wt + 62.5 uM MPZN	5 uM wt + 125 uM MPZN	5 uM wt + 250 uM MPZN	5 uM wt + 500 uM MPZN	5 uM wt + 1000 uM MPZN		Temperature	5 uM IRE1 P108A 2410	5 uM IRE1 W125A 2411		Temperature	5 uM 2045 IRE1 Q105C ox	5 uM 2045 IRE1 Q105C ox +DTT				Temperature	5 uM IRE1 wt 2042	5 uM wt + 62.5 uM MPZN	5 uM wt + 125 uM MPZN	5 uM wt + 250 uM MPZN	5 uM wt + 500 uM MPZN	5 uM wt + 1000 uM MPZN			Temperature	5 uM IRE1 P108A 2410	5 uM IRE1 W125A 2411		Temperature	5 uM 2045 IRE1 Q105C ox	5 uM 2045 IRE1 Q105C ox +DTT
20	2947.48	2931	2953.21	2918.3	2998.82	3015.81		25	193711	112149		20	3000.42	2987.73				20	20.2189	19.4403	18.4224	16.778	22.5047	18.183			26.4894	-4315.94	-3113.64		20	13.2777	11.6846
20.2	2939.39	2923.23	2945.84	2911.59	2989.82	3008.54		25.4	193742	111891		20.5	2988.96	2976.71				20.2	43.8077	42.1207	39.9152	36.3524	48.7602	39.3965			26.8617	-4379.95	-3066.77		20.5	28.7683	25.3166
20.4	2931.3	2915.45	2938.47	2904.88	2980.81	3001.26		25.7	191568	110196		21	2977.5	2965.69				20.4	40.4378	38.8807	36.8448	33.5561	45.0095	36.366			27.234	-4128.75	-2803.8		21	26.5553	23.3692
20.6	2923.21	2907.68	2931.1	2898.17	2971.81	2993.99		26.1	189286	108347		21.5	2966.04	2954.67				20.6	40.4378	38.8807	36.8448	33.5561	45.0095	36.366			27.6064	-3976.74	-2674.34		21.5	26.5553	23.3692
20.8	2915.12	2899.9	2923.73	2891.46	2962.81	2986.72		26.5	187559	107274		22	2954.58	2943.65				20.8	40.4378	38.8807	36.8448	33.5561	45.0095	36.366			27.9787	-3907.04	-2786.34		22	26.5553	23.3692
21	2907.04	2892.12	2916.37	2884.75	2953.81	2979.44		26.9	186094	106458		22.5	2943.12	2932.63				21	40.4635	38.8838	37.0542	33.6525	45.2653	36.5712			28.3511	-3834.62	-2874.92		22.5	26.6344	23.3891
21.2	2898.95	2884.35	2909	2878.03	2944.81	2972.17		27.2	184732	105376		23	2931.66	2921.61				21.2	40.3018	38.7461	35.7609	32.9801	43.724	35.1528			28.7234	-3857.22	-2969.95		23	26.1509	23.2298
21.4	2890.92	2876.58	2902.13	2871.55	2936.42	2965.39		27.6	183186	104430		23.5	2920.56	2910.51				21.4	40.121	39.4391	33.201	32.3268	40.3989	33.7661			29.0957	-3884.93	-3079.8		23.5	25.116	23.2311
21.6	2882.94	2868.53	2895.68	2865.08	2928.63	2958.65		28	181739	103237		24	2910.1	2899.67				21.6	39.0927	40.8362	31.4402	32.1739	37.6779	32.6063			29.4681	-3846.7	-3201.15		24	24.7433	23.3797
21.8	2875.25	2860.25	2889.49	2858.7	2921.35	2952.34		28.4	180408	102415		24.5	2899.6	2888.81				21.8	38.8624	42.2404	30.9476	31.5917	34.7603	31.5161			29.8404	-3826.52	-3388.34		24.5	24.323	23.389
22	2867.4	2851.75	2883.31	2852.45	2914.67	2945.99		28.7	178804	101511		25	2889.15	2878.23				22	38.4428	41.565	30.1152	31.0584	32.7487	31.1895			30.2128	-3794.42	-3510.68		25	23.3172	23.4307
22.2	2859.91	2843.68	2877.47	2846.29	2908.18	2939.78		29.1	177233	100289		25.5	2879.36	2867.89				22.2	37.4054	40.0856	28.7576	30.3857	32.0396	32.4561			30.5851	-3753.38	-3499.66		25.5	22.6449	23.7297
22.4	2852.45	2835.73	2871.79	2840.35	2901.87	2933.03		29.5	176042	98775		26	2869.67	2857.84				22.4	36.3114	38.6304	27.792	28.6972	31.0107	33.3499			30.9574	-3770.34	-3561.21		26	22.9094	23.8115
22.6	2845.39	2828.34	2866.35	2834.84	2895.8	2926.49		29.8	174905	97854		26.5	2859.95	2847.98				22.6	35.0692	34.9787	26.7278	26.396	29.1967	33.1204			31.3298	-3708.52	-3719.67		26.5	22.6816	22.959
22.8	2838.42	2821.75	2861.07	2829.72	2890.11	2919.78		30.2	173042	96483		27	2850.44	2838.26				22.8	33.9887	31.2494	26.0756	25.4157	28.8916	33.2123			31.7021	-3509.96	-3748.5		27	22.048	22.5387
23	2831.83	2815.73	2855.89	2824.62	2884.19	2913.25		30.6	171453	95259		27.5	2841.18	2828.37				23	32.291	29.7804	25.9165	25.2946	29.619	32.4932			32.0745	-3371.78	-3794.56		27.5	22.5908	23.05
23.2	2825.53	2809.81	2850.72	2819.58	2878.33	2906.83		31	170434	93848		28	2831.2	2818.58				23.2	29.9899	28.592	25.5933	25.3506	28.8837	30.8826			32.4468	-3305.13	-3836.27		28	23.9538	23.5855
23.4	2819.8	2804.32	2845.72	2814.45	2872.65	2900.89		31.3	168954	92326		28.5	2820.35	2808.2				23.4	28.5414	26.554	24.0161	26.0643	28.0932	29.4552			32.8191	-3092.73	-3844.29		28.5	25.1457	24.8136
23.6	2814.11	2799.12	2841.15	2809.16	2867.07	2894.99		31.7	167488	90988		29	2808.14	2796.54				23.6	27.2092	25.9148	21.9837	26.7019	27.8798	29.0411			33.1915	-2965.43	-3879.25		29	27.2366	27.7967
23.8	2808.98	2793.98	2836.93	2803.79	2861.52	2889.24		32.1	166313	90006		29.5	2794.56	2783.32				23.8	24.3718	24.7634	20.0117	27.0444	27.4196	29.1042			33.5638	-2820.4	-3884.26		29.5	30.9504	30.9807
24	2804.33	2789.24	2833.14	2798.42	2856.17	2883.34		32.4	164830	88252		30	2778.83	2768.52				24	22.3159	23.026	17.8134	25.9659	25.5452	29.3427			33.9362	-2572.29	-3836.1		30	34.2973	33.4637
24.2	2800	2784.68	2829.66	2793.46	2851.28	2877.56		32.8	163658	86594		30.5	2761.77	2751.6				24.2	21.3908	23.0825	18.2087	23.9978	23.8561	28.4031			34.3085	-2482.94	-3864.34		30.5	36.2762	35.4231
24.4	2795.79	2779.98	2825.76	2788.8	2846.52	2871.97		33.2	162747	85424		31	2744.35	2733.95				24.4	20.0501	23.4727	20.177	22.4793	24.2196	27.805			34.6809	-2353.72	-3928.62		31	37.3066	36.1048
24.6	2791.99	2775.34	2821.64	2784.41	2841.59	2866.39		33.6	161699	83934		31.5	2727.1	2716.48				24.6	18.2735	22.8074	20.9333	21.9135	24.5299	28.3613			35.0532	-2153.09	-3943.39		31.5	37.2281	35.6142
24.8	2788.4	2770.84	2817.38	2780.02	2836.74	2860.68		33.9	160450	82351		32	2710.35	2699.86				24.8	17.9256	22.8081	21.9685	21.461	24.0045	27.8042			35.4255	-1895.13	-3936.59		32	35.0625	34.0829
25	2784.78	2766.27	2812.86	2775.82	2831.91	2855.32		34.3	159787	81076		32.5	2695.53	2684.39				25	18.2331	21.9719	23.2251	21.1953	25.1686	26.1843			35.7979	-1631.57	-3969.08		32.5	31.8202	31.4282
25.2	2781.14	2762.15	2808.23	2771.52	2826.7	2850.17		34.7	158500	79635		33	2682.74	2670.8				25.2	17.9259	19.1436	21.747	21.5272	26.0625	25.3891			36.1702	-1221.82	-3952.79		33	28.657	28.7212
25.4	2777.65	2758.58	2804.15	2767.27	2821.63	2845.2		35.1	157818	78302		33.5	2671.47	2658.88				25.4	16.985	17.1057	20.732	20.627	24.2381	23.9702			36.5426	-865.785	-3921.99		33.5	25.1113	26.1821
25.6	2774.33	2755.27	2799.87	2763.32	2817.04	2840.62		35.4	157445	76655		34	2662.18	2648.72				25.6	16.658	15.943	21.097	18.7761	22.051	21.992			36.9149	-434.683	-3865.28		34	21.3435	22.4787
25.8	2771.04	2752.22	2795.79	2759.76	2812.8	2836.41		35.8	156195	75083		34.5	2654.55	2640.56				25.8	15.2896	14.1121	19.7386	16.9134	20.1183	19.8488			37.2872	125.468	-3828.35		34.5	18.5107	19.0376
26	2768.25	2749.55	2792	2756.51	2809	2832.62		36.2	155724	73662		35	2648.14	2634.27				26	13.3172	13.5288	18.0318	16.1175	17.8553	18.6328			37.6596	681.545	-3721.06		35	16.0065	16.4389
26.2	2765.7	2746.75	2788.56	2753.36	2805.59	2828.86		36.5	155278	72168		35.5	2642.53	2629.37				26.2	11.5493	14.0542	16.9088	14.1712	16.9998	19.1157			38.0319	1265.64	-3608.39		35.5	13.5216	13.4734
26.4	2763.57	2743.96	2785.32	2750.8	2802.2	2824.98		36.9	155041	70837		36	2637.74	2625.39				26.4	10.8191	13.833	14.1964	13.0175	15.9975	19.5833			38.4043	1878.21	-3451.41		36	12.0139	11.0681
26.6	2761.34	2741.2	2782.88	2748.08	2799.22	2821.14		37.3	154969	69322		36.5	2633.09	2621.83				26.6	10.5134	13.8784	11.3748	13.3702	14.2134	17.6773			38.7766	2577.84	-3266.05		36.5	11.1302	10.2508
26.8	2759.35	2738.4	2780.65	2745.5	2796.45	2817.84		37.7	155244	67931		37	2628.51	2618.28				26.8	10.4917	14.2932	10.8168	12.7121	13.6602	17.362			39.1489	3290.9	-3066.32		37	10.3912	9.56104
27	2757.14	2735.56	2778.49	2743.03	2793.75	2814.15		38	155417	66527		37.5	2623.76	2614.37				27	10.2977	13.2814	11.2636	11.1955	13.3263	17.9277			39.5213	4152.56	-2835.08		37.5	10.2454	9.55845
27.2	2755.2	2733.1	2776.11	2740.95	2791.2	2810.76		38.4	155918	65061		38	2619.05	2610.52				27.2	10.6122	12.008	12.2178	11.2099	11.2094	16.305			39.8936	5067.76	-2568.04		38	10.1348	10.1986
27.4	2752.89	2730.7	2773.62	2738.54	2789.16	2807.57		38.8	156630	63699		38.5	2614.55	2606.63				27.4	10.9897	11.8222	12.6534	11.3312	11.0303	15.8153			40.266	6066.58	-2342.52		38.5	9.79054	10.2917
27.6	2750.79	2728.36	2771.02	2736.47	2786.64	2804.33		39.1	157966	62818		39	2610.07	2603.08				27.6	11.5085	11.668	13.787	10.2235	13.7618	17.631			40.6383	7169.56	-2107.79		39	9.40613	10.0734
27.8	2748.25	2726.02	2768.14	2734.39	2783.74	2800.63		39.5	159154	61558		39.5	2606.12	2599.63				27.8	12.7966	11.5699	14.2299	10.4451	14.5317	17.0852			41.0106	8366.27	-1852.61		39.5	8.67537	9.51084
28	2745.7	2723.69	2765.39	2732.25	2780.9	2797.57		39.9	160728	60647		40	2602.56	2596.57				28	13.6453	12.4809	13.537	11.3228	13.9023	15.1806			41.383	9570.23	-1630.27		40	8.29441	8.29442
28.2	2742.83	2721.05	2762.75	2729.85	2778.13	2794.5		40.3	162873	59589		40.5	2599.09	2593.66				28.2	13.8528	13.2039	12.4336	12.2751	14.7371	14.822			41.7553	10758.4	-1352.66		40.5	8.70743	7.32917
28.4	2740.2	2718.52	2760.35	2727.35	2775.12	2791.72		40.6	164996	58751		41	2595.48	2590.92				28.4	13.3086	11.6042	12.6739	12.9298	13.298	12.6279			42.1277	11986.9	-1100.2		41	8.91773	6.76479
28.6	2737.56	2716.42	2757.69	2724.7	2772.91	2789.44		41	167989	58023		41.5	2592.42	2587.89				28.6	11.9252	9.73373	12.5952	13.2857	9.97057	10.4691			42.5	13066.7	-824.022		41.5	9.11398	6.67122
28.8	2735.47	2714.55	2755.36	2722.08	2771.01	2787.34		41.4	171258	57501		42	2589.37	2584.92				28.8	9.88011	9.51048	11.5297	12.7765	9.2616	11.9328			42.8723	14123.4	-486.428		42	9.50805	7.24847
29	2733.58	2712.61	2753	2719.57	2769.14	2784.57		41.8	175059	56845		42.5	2586.36	2582.01				29	8.2918	9.06322	11.7351	12.6938	9.2783	14.8192			43.2447	15046.2	-84.6		42.5	8.90822	7.44882
29.2	2732.02	2710.81	2750.5	2716.96	2767.19	2781.39		42.1	179536	56545		43	2583.55	2579.03				29.2	8.70257	10.1814	14.6285	13.2856	10.6506	17.3397			43.617	15791.1	419.285		43	7.91798	7.52196
29.4	2729.85	2708.26	2747.02	2714.16	2764.6	2777.42		42.5	184116	55972		43.5	2580.88	2576.24				29.4	13.2167	16.1724	19.4179	15.2064	16.8535	23.794			43.9894	16316.7	1022.9		43.5	7.41391	7.8417
29.6	2726.53	2704.19	2742.65	2710.66	2760.29	2771.77		42.9	189209	55652		44	2577.85	2574.06				29.6	20.6401	24.4031	25.1572	20.654	25.4344	32.0017			44.3617	16651.4	1741.06		44	7.34443	7.44759
29.8	2721.43	2698.49	2736.77	2705.72	2754.37	2764.7		43.2	194667	55623		44.5	2574.77	2572.02				29.8	30.4992	32.2347	34.5413	29.0119	34.6042	38.3778			44.734	16523.5	2553.4		44.5	7.5334	6.91897
30	2714.25	2691.24	2728.82	2699.06	2746.38	2756.43		43.6	200696	55549		45	2571.84	2570.13				30	42.1367	41.5651	44.0991	37.0418	45.44	44.7201			45.1064	16234.3	3594.11		45	7.70072	7.16899
30.2	2704.78	2681.98	2719.31	2690.99	2736.39	2746.83		44	206667	55719		45.5	2569.02	2568.52				30.2	50.6247	49.2957	50.4431	43.8282	53.0991	51.3498			45.4787	15515	4770.46		45.5	7.6731	7.02686
30.4	2694.41	2671.87	2708.88	2681.68	2725.47	2736.16		44.4	213215	56214		46	2566.45	2566.9				30.4	52.3602	51.1055	53.3193	48.6794	55.261	53.4525			45.8511	14645	6111.39		46	7.61314	6.52415
30.6	2684.17	2661.85	2698.24	2671.85	2714.54	2725.73		44.7	219687	56773		46.5	2564.18	2564.84				30.6	49.1352	48.1078	52.4708	47.9576	53.6575	50.9425			46.2234	13565.6	7705.67		46.5	6.95006	5.93575
30.8	2675.04	2652.82	2688.23	2662.77	2704.28	2715.92		45.1	226050	57981		47	2561.9	2563				30.8	41.4206	42.4851	45.773	43.0365	47.9247	46.811			46.5957	12364.5	9433.48		47	5.81217	4.90652
31	2667.81	2645.04	2680.11	2654.77	2695.61	2707.18		45.5	231976	59197		47.5	2559.56	2561.26				31	30.2097	33.8953	36.5912	36.3899	38.1811	40.0669			46.9681	11021.8	11342.7		47.5	5.60528	3.50247
31.2	2662.94	2639.35	2673.62	2648.34	2689.04	2700.07		45.9	238295	61216		48	2557.28	2559.79				31.2	19.5317	23.6118	27.3914	27.519	28.1077	30.0768			47.3404	9516.56	13366.4		48	5.28923	2.49097
31.4	2659.84	2635.44	2669.13	2643.76	2684.29	2695.11		46.2	242890	63453		48.5	2555.01	2558.72				31.4	11.4055	16.1539	18.3323	18.6286	19.4943	20.7222			47.7128	8248.9	15516.9		48.5	4.26689	1.41722
31.6	2658.2	2632.71	2666.16	2640.75	2681.15	2691.61		46.6	248587	66715		49	2552.93	2558.55				31.6	6.01117	11.7337	11.1807	12.385	12.3059	14.5171			48.0851	6672.75	17491		49	3.80427	-0.0306809
31.8	2657.27	2630.69	2664.45	2638.73	2679.27	2689.23		47	252128	70338		49.5	2551.26	2558.91				31.8	3.23657	7.7614	7.54278	7.21232	6.38175	9.1491			48.4574	5408.89	19406.7		49.5	3.96863	-0.918634
32	2656.78	2629.54	2663.05	2637.8	2678.41	2687.83		47.3	256681	74742		50	2549.93	2560.02				32	2.35605	4.64878	5.21265	2.59538	3.45191	5.47331			48.8298	4004.53	21059.4		50	3.32643	-2.16211
32.2	2656.26	2628.74	2662.36	2637.54	2677.73	2686.82		47.7	259830	80294		50.5	2548.7	2561.8				32.2	2.45715	3.29813	2.63272	0.515019	3.21201	5.79348			49.2021	2699.28	22323.4		50.5	2.94325	-4.44698
32.4	2655.77	2628.23	2661.89	2637.5	2677.1	2685.43		48.1	262714	86361		51	2547.79	2564.73				32.4	3.10492	1.52199	1.98682	-0.0656617	3.28325	7.25249			49.5745	1628.39	23251.3		51	3.40721	-7.11114
32.6	2655.07	2628.11	2661.51	2637.52	2676.43	2683.99		48.5	264726	93261		51.5	2547.06	2568.86				32.6	2.63686	0.000133424	2.14306	-0.0545107	2.81858	6.89966			49.9468	609.12	23604.4		51.5	3.10721	-9.81151
32.8	2654.71	2628.14	2661.06	2637.46	2675.95	2682.64		48.8	266080	101201		52	2546.2	2574.38				32.8	2.30537	0.15025	1.51636	0.892882	2.94755	7.4588			50.3191	-135.629	23344.9		52	1.99171	-13.7728
33	2654.09	2628.01	2660.82	2637.12	2675.3	2681.02		49.2	268034	109886		52.5	2545.43	2581.72				33	3.15279	0.636384	2.45232	2.567	2.14784	7.96228			50.6915	-948.997	22351.3		52.5	1.19134	-18.5254
33.2	2653.49	2627.85	2659.99	2636.47	2675.12	2679.58		49.6	268002	118272		53	2544.98	2591.1				33.2	3.00798	1.7327	5.10249	3.65753	0.600051	6.02449			51.0638	-1512.37	20669.2		53	0.162407	-23.4915
33.4	2652.92	2627.27	2658.87	2635.71	2674.97	2678.59		49.9	268903	127573		53.5	2544.67	2602.57				33.4	2.1376	4.00116	5.81732	3.92149	0.873392	4.47081			51.4362	-2144.86	18153.5		53.5	-0.971408	-28.8991
33.6	2652.54	2626.33	2657.7	2634.92	2674.69	2677.67		50.3	268771	136790		54	2544.29	2615.98				33.6	3.29888	4.62189	6.00914	3.97849	2.43883	5.28774			51.8085	-2498.16	15269.4		54	-1.05325	-34.1496
33.8	2651.63	2625.46	2656.45	2634.15	2674	2676.5		50.7	267794	145727		54.5	2544.25	2631.51				33.8	4.06102	4.47205	6.90146	3.45826	3.52719	5.50434			52.1809	-2751.42	12030.9		54.5	-0.508576	-39.3222
34	2651.04	2624.48	2655.06	2633.53	2673.27	2675.49		51.1	267945	154656		55	2544.04	2648.67				34	2.20386	5.60397	5.51899	3.11526	4.93805	5.02389			52.5532	-2995.78	8890.61		55	-0.147723	-43.4666
34.2	2650.66	2623.26	2654.31	2632.87	2672.01	2674.38		51.4	266657	162453		55.5	2543.77	2667.32				34.2	2.13919	5.91879	2.81076	3.36523	6.98169	6.81375			52.9255	-3126.08	6128.98		55.5	0.411177	-46.233
34.4	2650.09	2622.21	2653.8	2632.18	2670.61	2672.8		51.8	266661	169429		56	2543.37	2686.35				34.4	3.9724	4.43321	2.81432	3.59733	6.47449	8.02152			53.2979	-3138.53	4084.12		56	1.05893	-48.175
34.6	2649.18	2621.46	2653.13	2631.45	2669.47	2671.29		52.2	265069	174446		56.5	2543.08	2705.46				34.6	3.46959	3.81411	3.57416	3.48363	5.08347	6.9698			53.6702	-3062.56	2619.56		56.5	0.733643	-49.4983
34.8	2648.73	2620.68	2652.4	2630.79	2668.45	2669.99		52.6	263770	178056		57	2542.82	2724.11				34.8	2.60361	3.25811	3.54401	3.20333	6.26356	6.47762			54.0426	-3080.25	1637.35		57	-0.24125	-48.9068
35	2648.05	2620.19	2651.69	2630.1	2666.95	2668.67		52.9	262358	179960		57.5	2542.94	2741.65				35	3.66543	1.91525	3.88287	4.21601	7.64599	6.60866			54.4149	-3249.71	1099.71		57.5	-0.883645	-46.9551
35.2	2647.3	2619.9	2650.78	2629.07	2665.52	2667.39		53.3	261380	181698		58	2543	2757.15				35.2	3.84081	0.791661	5.7313	5.75549	6.30536	5.72916			54.7872	-3340.76	796.314		58	-1.591	-44.1894
35.4	2646.55	2619.8	2649.47	2627.84	2664.4	2666.36		53.7	260223	181729		58.5	2543.15	2770.82				35.4	3.23736	0.963735	6.16101	6.34271	5.84975	5.34438			55.1596	-3461.44	602.316		58.5	-3.05463	-39.4468
35.6	2645.96	2619.45	2648.4	2626.55	2663.17	2665.25		54	259357	182341		59	2543.24	2782.02				35.6	3.61458	2.23437	4.99389	6.81453	5.86716	4.99888			55.5319	-3555.39	417.897		59	-3.68027	-33.0045
35.8	2645.1	2618.93	2647.45	2625.15	2662.17	2664.37		54.4	257696	182448		59.5	2543.38	2790.29				35.8	3.92402	2.88185	4.37236	7.08313	3.33991	4.278			55.9043	-3644.25	267.363		59.5	-3.76852	-26.0143
36	2644.39	2618.33	2646.59	2623.84	2661.78	2663.52		54.8	257402	183653		60	2543.58	2795.79				36	4.25488	2.84212	4.97292	4.95692	1.8089	4.15463			56.2766	-3750.91	94.3133		60	-4.42994	-19.0289
36.2	2643.41	2617.72	2645.51	2623.2	2661.34	2662.75		55.2	255577	183474		60.5	2544.27	2799.16				36.2	4.55225	4.46861	4.4331	2.30715	2.20837	3.24109			56.6489	-3671.77	106.13		60.5	-4.95683	-12.529
36.4	2642.64	2616.57	2644.82	2622.86	2660.88	2662.21		55.5	254273	183408		61	2545.31	2800.51				36.4	3.33716	5.62322	3.84418	0.983055	2.71802	2.27039			57.0213	-3716.76	-47.4476		61	-5.37464	-7.17011
36.6	2642.04	2615.6	2643.9	2622.78	2660.22	2661.71		55.9	252350	183619		61.5	2546.99	2800.43				36.6	2.78137	4.25058	4.76044	-0.161918	3.90403	3.86732			57.3936	-3604.72	-180.435		61.5	-7.25996	-2.80877
36.8	2641.46	2614.82	2642.93	2622.84	2659.3	2660.69		56.3	251698	183938		62	2549.19	2799.55				36.8	3.59951	4.06444	5.27744	0.0482718	5.60662	4.77888			57.766	-3755.12	-327.344		62	-9.55075	0.353977
37	2640.65	2613.95	2641.81	2622.7	2658.11	2659.84		56.6	250090	183371		62.5	2552.15	2798.06				37	3.28606	4.4014	5.2637	1.20764	4.57648	4.74262			58.1383	-3807.4	-427.387		62.5	-11.9404	2.64247
37.2	2640.15	2613.17	2640.81	2622.35	2657.47	2658.75		57	248863	183804		63	2555.8	2796.08				37.2	2.9285	2.51519	5.63044	2.38683	3.90094	5.84038			58.5106	-3923.56	-745.017		63	-15.4018	4.69804
37.4	2639.39	2612.93	2639.59	2621.76	2656.52	2657.54		57.4	247134	183747		63.5	2560.69	2793.88				37.4	4.30396	0.872528	5.48298	3.34934	3.98884	6.54067			58.883	-4053.15	-1012.34		63.5	-18.8609	6.0616
37.6	2638.45	2612.72	2638.67	2621.06	2655.93	2656.26		57.8	246055	183839		64	2566.89	2791.53				37.6	5.23727	1.28954	4.41093	3.4001	2.64494	4.66861			59.2553	-4245.98	-1263.27		64	-22.244	6.57218
37.8	2637.41	2612.42	2637.83	2620.41	2655.41	2655.62		58.1	244550	183713		64.5	2574.62	2788.76				37.8	3.98773	1.3125	3.26819	3.41394	2.20841	3.92299			59.6277	-4388.5	-1461.88		64.5	-26.6006	6.83299
38	2636.81	2612.17	2637.34	2619.7	2654.98	2654.62		58.5	242925	183028		65	2583.93	2786.11				38	3.77525	1.6361	2.53993	3.43543	3.04322	4.55507			60	-4475.88	-1560.04		65	-30.9905	7.37497
38.2	2635.86	2611.71	2636.8	2619.07	2654.23	2653.85		58.9	242269	183114		65.5	2595.19	2783.67				38.2	4.3393	3.14716	2.07926	2.61171	3.22127	4.05593			60.3723	-4628.74	-1828.3		65.5	-35.0376	8.08416
38.4	2635.13	2610.92	2636.48	2618.61	2653.72	2653		59.3	240206	182699		66	2608.31	2781				38.4	3.6753	4.4845	2.1244	2.75384	2.93492	3.46921			60.7447	-4509.36	-1873.33		66	-39.771	8.61738
38.6	2634.39	2609.97	2635.92	2617.91	2653.04	2652.39		59.6	238533	182332		66.5	2623	2778.39				38.6	3.02831	4.80612	2.60233	4.15045	3.105	4.36663			61.117	-4542.53	-1945.71		66.5	-43.822	9.35934
38.8	2633.85	2609.02	2635.42	2617	2652.51	2651.28		60	236895	181424		67	2639.44	2776.19				38.8	3.878	4.95643	3.34865	4.15434	2.48275	4.70573			61.4894	-4421.49	-1829.91		67	-45.8349	10.5348
39	2632.85	2608.02	2634.61	2616.21	2652	2650.58		60.4	235055	180677		67.5	2657.48	2773.48				39	4.39807	4.69126	3.57799	4.97199	2.75027	3.68428			61.8617	-4410.48	-1962.59		67.5	-46.4921	10.574
39.2	2632.15	2607.2	2634	2615.03	2651.39	2649.8		60.7	233411	180058		68	2676.1	2770.04				39.2	3.76903	3.30011	3.79866	5.73404	3.26084	2.8392			62.234	-4436.84	-1992.89		68	-45.5411	9.67051
39.4	2631.33	2606.71	2633.08	2614.05	2650.71	2649.44		61.1	231610	179313		68.5	2694.31	2766.49				39.4	3.55474	1.58979	4.17124	3.90608	3.45052	2.07798			62.6064	-4555.69	-2134.02		68.5	-41.4517	9.61764
39.6	2630.75	2606.51	2632.32	2613.45	2650	2649		61.5	230188	178900		69	2711.53	2762.41				39.6	2.78011	0.913592	4.59432	2.58742	3.92375	0.72651			62.9787	-4593.06	-2122.7		69	-35.0524	9.83178
39.8	2630.23	2606.28	2631.25	2612.99	2649.15	2649.16		61.9	228263	177603		69.5	2726.77	2757.81				39.8	1.92271	1.37084	5.00542	1.93184	4.14078	-0.875321			63.3511	-4635.77	-2211.91		69.5	-28.1017	9.80476
40	2629.98	2605.92	2630.35	2612.75	2648.36	2649.29		62.2	226938	177386		70	2738.88	2753.36				40	1.12419	2.34776	4.90853	-0.421948	4.19171	-1.22921			63.7234	-4919.38	-2505.86		70	-20.6482	10.5849
40.2	2629.74	2605.32	2629.31	2613.08	2647.49	2649.62		62.6	224832	176320		70.5	2747.74	2749.01				40.2	1.02511	3.62804	4.38789	-1.3426	4.16154	-1.17503			64.0957	-5045.11	-2633.16		70.5	-12.7025	11.8918
40.4	2629.55	2604.48	2628.6	2613.14	2646.75	2649.77		63	223941	176235		71	2753.56	2744.58				40.4	1.02673	4.80533	3.87683	0.658137	3.08248	-1.51747			64.4681	-5196.23	-2747.98		71	-6.32674	12.8802
40.6	2629.31	2603.42	2627.75	2612.84	2646.27	2650.22		63.4	221726	174458		71.5	2756.82	2740.19				40.6	1.29354	5.68555	3.43903	1.83608	1.70148	-1.59744			64.8404	-5209.39	-2772.87		71.5	-1.84115	13.4666
40.8	2629	2602.29	2627.22	2612.42	2646	2650.39		63.7	220025	174222		72	2757.79	2735.85				40.8	2.31052	5.12047	2.85028	2.57906	1.78561	-1.05572			65.2128	-5185.53	-2844.44		72	2.02674	13.3994
41	2628.4	2601.47	2626.55	2611.78	2645.59	2650.69		64.1	217806	172763		72.5	2756.95	2731.26				41	3.11101	2.71177	3.68301	4.09612	1.12366	-1.65421			65.5851	-5186.65	-2907.11		72.5	5.16892	13.2631
41.2	2627.82	2601.15	2625.8	2610.85	2645.58	2651.02		64.5	216611	172722		73	2755.05	2726.52				41.2	2.46927	1.34654	3.39242	4.54555	-0.201323	-1.54671			65.9574	-5216.91	-3031.5		73	6.81914	13.4267
41.4	2627.37	2600.83	2625.23	2610.06	2645.55	2651.3		64.8	214609	171029		73.5	2752.66	2721.66				41.4	2.90576	1.99114	2.4015	3.23284	0.703003	-1.32534			66.3298	-5160.51	-2981.41		73.5	8.23559	13.1338
41.6	2626.65	2600.41	2624.81	2609.6	2645.27	2651.59		65.2	211775	169539		74	2749.72	2716.57				41.6	3.60808	1.34995	2.21995	1.20804	2.11749	-1.88909			66.7021	-5039.43	-2949.14		74	9.72344	12.8172
41.8	2626	2600.3	2624.36	2609.53	2644.82	2652.06		65.6	210191	168725		74.5	2746.18	2710.93				41.8	2.63973	0.514088	1.68201	0.161614	1.15541	-2.34999			67.0745	-5085.94	-2980.78		74.5	10.029	13.3404
42	2625.56	2600.08	2624.17	2609.52	2644.76	2652.52		66	208495	167962		75	2742.78	2705.09				42	2.40902	2.18195	0.108405	-0.768215	1.21318	-2.64793			67.4468	-5197.04	-3097.97		75	9.82124	13.6584
42.2	2624.97	2599.48	2624.2	2609.83	2644.25	2653.15		66.3	206295	166481		75.5	2739.05	2699.3				42.2	3.75337	2.66391	1.00594	-1.66841	3.02047	-3.59126			67.8191	-5198.87	-3126.75		75.5	9.99874	13.1903
42.4	2624.15	2599.13	2623.75	2610.11	2643.65	2653.96		66.7	204859	166003		76	2734.65	2693.26				42.4	3.03621	0.919503	2.1105	-1.23891	2.78227	-4.37633			68.1915	-5318.52	-3254.68		76	9.90662	12.9065
42.6	2623.78	2599.06	2623.42	2610.26	2643.18	2654.93		67.1	202629	164234		76.5	2729.73	2687.46				42.6	1.86676	0.349324	1.59258	0.397224	1.8771	-5.66118			68.5638	-5347.57	-3255.8		76.5	9.98317	12.9851
42.8	2623.33	2598.95	2623.06	2610	2642.85	2656.24		67.4	200891	163216		77	2724.93	2682.26				42.8	2.4556	0.453217	2.37583	1.03597	2.14536	-7.27327			68.9362	-5401.96	-3386.37		77	10.9033	12.7934
43	2622.85	2598.91	2622.5	2609.87	2642.41	2657.79		67.8	198640	161855		77.5	2719.94	2677.32				43	1.80689	-0.0855484	2.77465	1.31582	0.681246	-8.00799			69.3085	-5396.41	-3439.59		77.5	11.6534	12.7026
43.2	2622.64	2598.95	2622.03	2609.47	2642.67	2659.45		68.2	197011	161155		78	2715.31	2672.47				43.2	0.327478	0.133407	1.65568	1.93183	-2.57131	-8.9556			69.6809	-5469.23	-3549.8		78	12.0328	13.1691
43.4	2622.63	2598.84	2621.82	2609.17	2643.35	2661.39		68.6	195218	160192		78.5	2711.16	2667.99				43.4	0.61877	0.579189	0.880214	1.09177	-3.80501	-10.196			70.0532	-5407.42	-3453.2		78.5	12.2586	13.7255
43.6	2622.33	2598.72	2621.67	2609.05	2644.15	2663.48		68.9	192698	158395		79	2707.19	2663.45				43.6	2.18818	0.927332	0.351672	-0.0601948	-4.50381	-10.4108			70.4255	-5167.63	-3273.17		79	12.0128	13.7402
43.8	2621.85	2598.45	2621.72	2609.17	2645.14	2665.6		69.3	191055	157260		79.5	2702.77	2658.52				43.8	1.60726	1.64677	-0.94041	-0.82016	-5.43073	-11.5422			70.7979	-5124.07	-3289.33		79.5	11.6071	13.1969
44	2621.71	2598.12	2622.04	2609.36	2646.24	2668.17		69.7	188787	155882		80	2698.05	2653.57				44	0.745873	1.32592	-1.9369	-1.18458	-4.76473	-13.971			71.1702	-4949.68	-3208.35		80	11.3886	12.8004
44.2	2621.5	2597.97	2622.49	2609.64	2647.01	2671.21		70.1	186711	154538		80.5	2692.92	2648.43				44.2	1.11849	0.180963	-2.99229	-1.43775	-3.22271	-16.6453			71.5426	-4938.8	-3217.08		80.5	11.3939	12.6028
44.4	2621.32	2598.04	2623.17	2609.96	2647.65	2674.8		70.4	184820	153160		81	2687.32	2642.95				44.4	0.539002	-0.750659	-3.0056	-2.15439	-4.05393	-18.8342			71.9149	-4996.28	-3285.48		81	11.8514	11.9279
44.6	2621.38	2598.26	2623.64	2610.53	2648.66	2678.68		70.8	182875	152096		81.5	2681.48	2637.43				44.6	-2.00376	-1.45595	-2.10734	-3.35535	-5.16302	-20.061			72.2872	-5026.05	-3383.55		81.5	11.9368	11.4575
44.8	2622.02	2598.63	2624.01	2611.26	2649.7	2682.79		71.2	180747	150699		82	2676.05	2632.35				44.8	-2.45234	-2.40356	-1.35314	-3.55298	-5.89552	-20.5534			72.6596	-5041.49	-3450.65		82	11.9895	11.9431
45	2622.29	2599.19	2624.15	2611.97	2651.07	2686.95		71.5	179062	149940		82.5	2670.8	2627.22				45	-1.61198	-2.71808	0.115522	-4.34491	-7.70747	-22.0123			73.0319	-5181.86	-3589.1		82.5	11.8754	12.0521
45.2	2622.71	2599.68	2624	2613.01	2652.8	2691.6		71.9	177810	148806		83	2665.39	2622.47				45.2	-2.20918	-2.53736	1.07387	-5.59939	-9.61311	-23.5363			73.4043	-5220.63	-3590.76		83	11.046	11.4391
45.4	2623.1	2600.17	2623.81	2614.13	2654.89	2696.37		72.3	175512	147110		83.5	2660.16	2618.01				45.4	-1.1914	-1.63821	0.466835	-5.11376	-11.0081	-24.8926			73.7766	-5177.07	-3577.1		83.5	10.4863	11.4253
45.6	2623.16	2600.38	2623.87	2615.09	2657.2	2701.69		72.7	174000	146250		84	2655.3	2613.75				45.6	0.62629	-1.64369	-0.961224	-5.31587	-12.4027	-28.9011			74.1489	-5214.58	-3693.53		84	10.62	11.3985
45.8	2622.99	2600.85	2624.24	2616.34	2659.86	2707.95		73	171658	144719		84.5	2650.3	2609.31				45.8	-0.486193	-2.12048	-3.08455	-7.08564	-13.9689	-33.0838			74.5213	-5148.87	-3656.47		84.5	10.2846	10.6682
46	2623.38	2601.18	2625.13	2617.87	2662.8	2714.83		73.4	169589	143275		85	2645.36	2605.05				46	-1.81949	-1.50393	-5.70509	-7.70195	-15.7396	-35.0902			74.8936	-5223.94	-3700.38		85	10.3364	10.2736
46.2	2623.67	2601.49	2626.45	2619.39	2666.17	2722.06		73.8	167827	142016		85.5	2640.53	2600.64				46.2	-1.72647	-1.68724	-6.88854	-7.7916	-17.9335	-38.6297			75.266	-5170.76	-3633.86		85.5	11.1723	10.1168
46.4	2624.2	2601.92	2627.87	2621.02	2669.88	2730.34		74.1	166090	140733		86	2635.64	2596.24				46.4	-4.59051	-3.08393	-8.18298	-8.77853	-18.3223	-43.4773			75.6383	-5147.84	-3582.16		86	10.9928	9.65209
46.6	2625.46	2602.68	2629.67	2622.84	2673.51	2739.31		74.5	163856	139240		86.5	2630.4	2591.83				46.6	-6.65759	-3.37896	-8.69327	-8.55079	-19.1329	-45.4183			76.0106	-5081.82	-3569.72		86.5	10.7015	9.49113
46.8	2626.7	2603.29	2631.27	2624.41	2677.57	2748.55		74.9	162307	138088		87	2625.34	2587.31				46.8	-5.49846	-3.86348	-7.65855	-7.55012	-20.7429	-48.3922			76.383	-5097.13	-3598.32		87	11.1531	9.71487
47	2627.67	2604.34	2632.76	2625.94	2681.75	2758.74		75.3	160143	136628		87.5	2620.02	2582.75				47	-4.71441	-6.77737	-7.19115	-8.07434	-21.0414	-53.0072			76.7553	-4963.38	-3515.15		87.5	11.0972	9.87101
47.2	2628.67	2605.96	2634.18	2627.73	2686.02	2769.61		75.6	158146	134977		88	2614.85	2578.18				47.2	-5.65053	-8.71934	-7.49258	-10.1438	-21.9116	-54.645			77.1277	-4902.77	-3516.09		88	10.5345	10.2473
47.4	2629.87	2607.78	2635.74	2630.05	2690.6	2780.57		76	156271	133876		88.5	2609.46	2573.67				47.4	-5.1183	-9.66124	-7.13606	-12.8589	-24.3076	-55.7395			77.5	-4859.04	-3535.03		88.5	10.6364	10.776
47.6	2630.74	2609.85	2637.14	2632.89	2695.78	2792.02		76.4	153980	132244		89	2604.29	2569.16				47.6	-5.06008	-11.2547	-8.68478	-15.8381	-27.1765	-59.3351			77.8723	-4793.91	-3463.86		89	10.8469	11.0677
47.8	2631.95	2612.25	2639.31	2636.38	2701.49	2804.21		76.8	152863	131547		89.5	2598.94	2564.9				47.8	-6.15565	-12.2263	-11.9707	-18.8489	-30.0557	-61.0215			78.2447	-4845.79	-3583.01		89.5	10.2431	10.6585
48	2633.22	2614.68	2641.89	2640.37	2707.86	2816.38		77.1	150715	130106		90	2593.79	2560.79				48	-7.41881	-12.1559	-14.0798	-20.8409	-34.0976	-61.7663			78.617	-4739.57	-3463.41		90	9.87982	9.86552
48.2	2634.94	2617.13	2644.95	2644.62	2715.11	2829.06		77.5	148849	128513		90.5	2588.43	2556.92				48.2	-8.94157	-12.4734	-16.3179	-21.2261	-37.5971	-65.3387			78.9894	-4736.39	-3454.77		90.5	10.0374	9.32824
48.4	2636.83	2619.72	2648.47	2648.84	2722.92	2842.52		77.9	146877	127095		91	2583.33	2553.02				48.4	-10.9127	-13.6999	-19.6868	-21.3099	-41.7044	-68.8511			79.3617	-4639.39	-3444.92		91	9.86165	8.7057
48.6	2639.36	2622.64	2652.79	2653.24	2731.77	2856.5		78.2	145401	126123		91.5	2578.04	2549.34				48.6	-13.738	-15.3455	-22.456	-23.0556	-45.625	-70.2968			79.734	-4707.65	-3528.58		91.5	9.29271	8.12434
48.8	2642.39	2625.94	2657.42	2658.14	2741.08	2870.67		78.6	143471	124487		92	2572.89	2545.69				48.8	-17.7234	-18.3424	-24.4804	-25.842	-47.4507	-72.5204			80.1064	-4708.68	-3527.46		92	9.48927	8.48042
49	2646.52	2630.03	2662.66	2663.67	2750.84	2885.55		79	141705	123415		92.5	2567.77	2542.3				49	-23.012	-22.0122	-28.0541	-30.0484	-50.9593	-75.883			80.4787	-4750.09	-3621.46		92.5	9.87973	9.10261
49.2	2651.54	2634.76	2668.68	2670.29	2761.56	2900.88		79.4	140058	122404		93	2563.12	2538.95				49.2	-27.0034	-25.8788	-32.2507	-36.644	-56.453	-76.5002			80.8511	-4748.61	-3653.06		93	9.76467	9.38622
49.4	2657.27	2640.41	2675.53	2678.33	2773.35	2916.08		79.7	138215	120513		93.5	2559.06	2535.84				49.4	-30.2121	-30.2659	-35.7898	-43.1626	-60.438	-75.6957			81.2234	-4670.05	-3560		93.5	9.63246	9.307
49.6	2663.64	2646.87	2682.96	2687.46	2785.71	2931.29		80.1	136553	119785		94	2555.31	2532.54				49.6	-33.8674	-34.6616	-38.6923	-47.8975	-63.7665	-77.6391			81.5957	-4619.16	-3560.68		94	9.83824	9.41394
49.8	2670.81	2654.23	2691.04	2697.44	2798.97	2947.16		80.5	134585	118026		94.5	2551.9	2529.39				49.8	-37.4263	-38.172	-42.3074	-52.1367	-69.5931	-80.216			81.9681	-4598.44	-3450.56		94.5	10.1031	9.14115
50	2678.51	2662.14	2699.88	2708.22	2813.43	2963.21		80.9	133409	117004		95	2548.46	2525.56				50	-38.859	-41.8964	-45.653	-54.861	-73.2636	-79.378			82.3404	-4556.85	-3426.3		95	4.28269	3.65397
50.2	2686.4	2670.99	2709.33	2719.25	2828.11	2978.86		81.2	131091	115377								50.2	-41.2693	-45.901	-49.4514	-55.1268	-73.7959	-77.88			82.7128	-4413.84	-3349.18
50.4	2695.13	2680.45	2719.73	2730.32	2843.02	2994.37		81.6	129365	114136								50.4	-45.8785	-48.7034	-54.5478	-56.4831	-76.1021	-77.2404			83.0851	-4339.17	-3398.73
50.6	2704.74	2690.55	2731.19	2741.92	2858.59	3009.56		82	127543	112653								50.6	-49.9872	-52.7683	-60.1773	-59.1284	-79.0377	-73.0766			83.4574	-4337.61	-3378
50.8	2715.12	2701.66	2743.82	2753.99	2874.63	3023.43		82.3	126008	111383								50.8	-53.6308	-58.7459	-66.0149	-61.8466	-81.6166	-65.8144			83.8298	-4281.7	-3372.32
51	2726.35	2714	2757.62	2766.74	2891.24	3035.92		82.7	124573	110335								51	-60.4753	-63.6696	-72.4483	-65.9499	-84.2375	-59.7755			84.2021	-4155.29	-3389.6
51.2	2739.33	2727.14	2772.74	2780.46	2908.32	3047.35		83.1	122851	109158								51.2	-67.6515	-68.618	-77.7767	-71.8347	-86.9798	-54.2247			84.5745	-4159.14	-3430.91
51.4	2753.29	2741.55	2788.67	2795.4	2925.93	3057.52		83.5	120919	107848								51.4	-72.1616	-75.7427	-81.9836	-76.0937	-88.0597	-46.7521			84.9468	-3962.28	-3402.58
51.6	2768.26	2757.35	2805.54	2810.84	2943.45	3066.03		83.8	119587	106583								51.6	-78.0318	-81.2113	-86.5305	-79.3339	-87.9156	-39.0239			85.3191	-3694.33	-3380.24
51.8	2784.57	2773.93	2823.25	2827.16	2960.99	3073.17		84.2	117874	105295								51.8	-85.4982	-84.6201	-90.4446	-83.4456	-86.04	-32.1996			85.6915	-3421.78	-3305
52	2802.32	2791.26	2841.69	2844.16	2977.8	3078.89		84.6	116506	103694								52	-90.0435	-89.3861	-93.8734	-86.5121	-83.0747	-24.6343			86.0638	-3284.81	-3258.17
52.2	2820.59	2809.72	2860.85	2861.71	2994.22	3083.07		84.9	114609	102717								52.2	-94.6416	-94.9424	-98.4189	-88.5795	-80.4962	-17.9101			86.4362	-3337.58	-3343.54
52.4	2840.3	2829.16	2881.04	2879.59	3009.9	3086.12		85.3	113501	101632								52.4	-101.953	-98.98	-102.616	-90.76	-76.2572	-12.3557			86.8085	-3512.11	-3349.49
52.6	2861.25	2849.3	2901.81	2897.95	3024.63	3088.04		85.7	112303	100336								52.6	-106.701	-102.945	-105.307	-91.9864	-70.5396	-7.00397			87.1809	-3701.5	-3256.12
52.8	2882.89	2870.35	2923.14	2916.23	3038.03	3088.98		86.1	109943	98750								52.8	-109.979	-107.408	-107.858	-90.508	-63.3475	-2.49393			87.5532	-3948	-3228.23
53	2905.25	2892.15	2944.88	2934.06	3049.91	3089.13		86.4	109559	97714								53	-113.917	-109.88	-109.383	-87.9499	-55.357	0.26693			87.9255	-4386.58	-3243.72
53.2	2928.35	2914.17	2966.72	2951.3	3060.13	3088.89		86.8	109048	96457								53.2	-116.03	-110.239	-108.019	-83.8189	-46.5915	3.01363			88.2979	-4573.32	-3224.24
53.4	2951.55	2936.17	2987.98	2967.47	3068.55	3087.99		87.2	107771	95486								53.4	-116.091	-109.56	-105.035	-77.7903	-38.0697	4.77847			88.6702	-4544.18	-3240.67
53.6	2974.78	2957.92	3008.71	2982.33	3075.37	3087.06		87.6	106201	94163								53.6	-116.608	-107.922	-102.06	-70.3276	-29.7176	5.15385			89.0426	-4433.62	-3183.65
53.8	2998.08	2979.15	3028.66	2995.59	3080.52	3085.93		87.9	103933	92643								53.8	-115.157	-102.996	-96.6984	-62.9965	-22.7493	5.55057			89.4149	-4261.02	-3163.06
54	3020.72	2999.02	3047.19	3007.5	3084.52	3084.84		88.3	102481	91545								54	-111.857	-96.8054	-88.0502	-55.2943	-16.6033	5.77456			89.7872	-4143.3	-3104.91
54.2	3042.73	3017.81	3063.79	3017.64	3087.17	3083.57		88.7	100751	90663								54.2	-107.335	-89.9127	-78.2862	-46.1305	-10.312	6.96667			90.1596	-4024.54	-3122.32
54.4	3063.52	3034.82	3078.45	3025.98	3088.69	3081.98		89	98742	89175								54.4	-100.668	-80.3021	-68.0596	-37.4964	-4.70773	9.57861			90.5319	-3925.8	-3055.54
54.6	3082.85	3049.79	3090.87	3032.68	3089.11	3079.77		89.4	97229	88125								54.6	-91.837	-68.4301	-55.2739	-29.7921	-0.101692	11.3556			90.9043	-3910.18	-3034.19
54.8	3100.1	3062.19	3100.51	3037.86	3088.81	3077.49		89.8	95937	86959								54.8	-80.5741	-56.8083	-41.4339	-21.3005	3.19424	12.1564			91.2766	-3875.66	-2967.04
55	3114.96	3072.52	3107.57	3041.21	3087.89	3074.85		90.2	94376	85641								55	-67.4479	-45.313	-29.9157	-12.7235	5.78086	14.3456			91.6489	-3744.15	-2890.68
55.2	3127.06	3080.26	3112.58	3043.06	3086.55	3071.8		90.5	92759	84561								55.2	-54.299	-32.4277	-20.036	-6.11974	7.74014	15.6259			92.0213	-3702.39	-2880.12
55.4	3136.65	3085.58	3115.62	3043.73	3084.92	3068.75		90.9	91315	83280								55.4	-40.6093	-21.1287	-10.2429	-0.515639	7.4402	14.2471			92.3936	-3654.99	-2914.9
55.6	3143.31	3088.89	3116.81	3043.37	3083.62	3066.11		91.3	90122	82669								55.6	-26.5628	-12.8219	-2.57374	3.50536	6.48096	12.9445			92.766	-3646.89	-2986.16
55.8	3147.48	3090.82	3116.86	3042.45	3082.25	3063.53		91.6	88490	81126								55.8	-16.0536	-6.19852	1.41818	5.62341	7.0785	12.5975			93.1383	-3554.86	-2895.92
56	3149.93	3091.44	3116.35	3041.22	3080.8	3061.15		92	87043	80094								56	-8.77904	-0.295598	3.97082	6.0518	7.16862	10.7869			93.5106	-4041.37	-3181.81
56.2	3151.07	3091.11	3115.34	3040.07	3079.4	3059.25		92.4	85663	79058								56.2	-2.2862	2.78485	5.70633	5.86998	6.79164	8.27069
56.4	3150.98	3090.44	3114.17	3038.86	3077.97	3057.73		92.8	84390	78097								56.4	2.05206	4.01174	5.62876	6.03561	8.91786	7.81658
56.6	3150.43	3089.54	3113.09	3037.66	3075.86	3056.04		93.1	83337	77099								56.6	3.36222	4.88753	5.54459	6.22537	10.3288	8.85732
56.8	3149.67	3088.5	3111.89	3036.41	3073.92	3054.22		93.5	81637	75914								56.8	4.42778	5.62425	6.65818	5.58269	9.99196	9.04071
57	3148.64	3087.33	3110.39	3035.41	3071.82	3052.43		93.9	80505	74579								57	6.00628	5.45435	8.35463	5.29955	10.7458	9.05657
57.2	3147.33	3086.3	3108.53	3034.26	3069.65	3050.55		94.2553	79027	73481								57.2	6.49613	5.46193	10.4018	5.72683	11.1118	10.0231
57.4	3146.1	3085.04	3106.26	3033.13	3067.46	3048.4		94.6277	77915	72697								57.4	5.82632	7.39304	12.0882	5.83678	9.84866	11.185
57.6	3144.96	3083.3	3103.79	3031.89	3065.66	3046.11		95	73672	70032								57.6	6.02399	10.2276	11.8689	6.34315	9.66111	11.4855
57.8	3143.65	3081.04	3101.53	3030.49	3063.52	3043.73												57.8	6.83092	11.3139	11.457	8.7409	10.8014	13.3735
58	3142.21	3078.79	3099.21	3028.38	3061.37	3040.71												58	7.78815	12.0878	11.1053	11.4448	10.9168	16.0635
58.2	3140.51	3076.16	3097.11	3026.04	3059.11	3037.35												58.2	9.10855	14.0691	10.3434	11.5976	12.1421	17.8282
58.4	3138.5	3073.3	3095.03	3023.79	3056.52	3033.64												58.4	11.656	13.6024	10.4125	11.1481	13.2952	18.6538
58.6	3135.87	3070.82	3092.89	3021.58	3053.83	3029.94												58.6	13.7942	11.2295	11.3664	11.0077	13.57	18.8548
58.8	3133.07	3068.72	3090.49	3019.44	3051.1	3026.22												58.8	14.4565	10.6038	12.1669	9.85879	13.8816	16.8388
59	3130.12	3066.48	3088.08	3017.63	3048.32	3023.22												59	14.8482	11.9681	12.0738	8.72278	13.6722	14.8303
59.2	3127.15	3064.01	3085.7	3015.83	3045.69	3020.26												59.2	15.0268	11.5014	11.3864	10.0045	12.0689	13.3232
59.4	3124.15	3061.88	3083.53	3013.64	3043.4	3017.88												59.4	14.2466	10.8693	10.5674	10.891	12.3335	11.7424
59.6	3121.44	3059.53	3081.45	3011.52	3040.7	3015.45												59.6	13.468	13.0662	10.1779	10.7852	13.711	12.1964
59.8	3118.68	3056.7	3079.49	3009.33	3038	3012.94												59.8	14.4394	14.4558	8.98296	10.7727	13.0283	13.662
60	3115.7	3053.91	3077.81	3007.23	3035.44	3010.01												60	14.6704	12.4706	8.6983	10.5014	13.4708	14.5292
60.2	3112.89	3051.66	3075.96	3005.14	3032.58	3007.12												60.2	13.4719	11.6053	9.37774	9.78955	14.8088	15.5331
60.4	3110.29	3049.18	3074.06	3003.25	3029.63	3003.76												60.4	12.8221	12.7265	9.86615	10.095	13.9908	17.4439
60.6	3107.7	3046.69	3071.98	3001.03	3027.02	3000.22												60.6	13.3664	11.1025	10.9697	11.661	12.3887	17.8299
60.8	3104.99	3044.7	3069.65	2998.58	3024.6	2996.69												60.8	12.792	10.2391	12.577	13.2748	12.2034	17.0887
61	3102.6	3042.48	3066.99	2995.75	3022.13	2993.38												61	11.7549	11.8073	13.188	14.5071	12.0472	16.5718
61.2	3100.16	3040.02	3064.39	2992.82	3019.79	2990.05												61.2	13.2423	12.352	13.5964	15.0054	11.6719	16.3403
61.4	3097.28	3037.57	3061.55	2989.76	3017.41	2986.88												61.4	15.0787	12.11	14.4362	15.5292	12.3338	15.3114
61.6	3094.21	3035.1	3058.68	2986.67	3014.84	2983.95												61.6	15.2352	13.4826	13.8605	14.8286	13.0772	13.8591
61.8	3091.18	3032.23	3055.98	2983.84	3012.16	2981.29												61.8	15.6062	13.7723	13.6574	13.7028	14.1815	13.2718
62	3087.93	3029.65	3053.15	2981.11	3009.17	2978.57												62	16.9112	12.961	14.6866	14.1068	15.2936	13.8994
62.2	3084.5	3027	3050.12	2978.16	3006.06	2975.7												62.2	16.4551	13.2484	15.4752	15.1581	16.1497	15.0476
62.4	3081.37	3024.37	3047.03	2975.08	3002.74	2972.58												62.4	15.6224	12.989	15.0122	15.4221	16.3612	15.6252
62.6	3078.2	3021.78	3044.11	2971.98	2999.53	2969.45												62.6	15.9738	13.1895	14.7584	16.1971	16.5699	15.9637
62.8	3074.99	3019.05	3041.11	2968.66	2996.17	2966.11												62.8	16.0173	14.3305	14.8005	16.0651	15.8637	18.0901
63	3071.79	3016.08	3038.2	2965.65	2993.22	2962.31												63	15.911	14.833	14.6085	14.1331	14.5477	18.4987
63.2	3068.59	3013.16	3035.29	2962.96	2990.35	2958.86												63.2	16.783	14.441	13.8906	13.2806	13.1481	16.0887
63.4	3065.14	3010.26	3032.57	2960.31	2987.94	2955.82												63.4	16.523	15.1044	14.636	12.7282	12.0439	15.0514
63.6	3062.02	3007.17	3029.36	2957.84	2985.46	2952.79												63.6	15.3457	14.5961	16.6991	12.3415	12.2321	14.9151
63.8	3058.94	3004.42	3025.96	2955.27	2982.99	2949.89												63.8	15.4047	14.0767	17.3642	13.9204	13.3117	13.7863
64	3055.83	3001.46	3022.46	2952.24	2980.16	2947.22												64	16.0223	15.2404	17.2402	16.2509	13.6637	13.6533
64.2	3052.57	2998.34	3019.05	2948.86	2977.48	2944.34												64.2	15.7663	15.8625	17.674	16.6966	14.8741	15.1467
64.4	3049.48	2995.15	3015.46	2945.61	2974.19	2941.17												64.4	16.5295	15.7696	16.8972	16.3758	16.7717	16.3215
64.6	3045.97	2992.01	3012.36	2942.33	2970.89	2937.8												64.6	17.0122	16.4732	14.7384	15.8385	16.2872	17.9147
64.8	3042.76	2988.61	3009.5	2939.32	2967.69	2934.06												64.8	15.773	16.2939	13.9089	14.5308	15.634	18.4065
65	3039.66	2985.56	3006.75	2936.55	2964.55	2930.5												65	14.5771	14.6076	13.7614	12.6213	16.7989	17.6926
65.2	3036.85	2982.66	3003.96	2934.2	2961	2926.97												65.2	14.8888	15.1178	14.1717	12.0834	17.241	17.5984
65.4	3033.68	2979.5	3001.04	2931.64	2957.71	2923.51												65.4	15.4111	15.6166	15.2387	12.8309	16.6524	16.5828
65.6	3030.65	2976.46	2997.86	2929.04	2954.27	2920.33												65.6	16.4367	15.1034	16.2924	13.8674	17.541	15.483
65.8	3027.04	2973.4	2994.54	2926.06	2950.71	2917.23												65.8	18.8083	15.811	17.0733	15.4988	17.9869	15.928
66	3023.19	2970.09	2991.06	2922.85	2947.15	2913.91												66	20.1307	17.3924	17.4522	16.9194	17.0804	17.2327
66.2	3019.09	2966.5	2987.62	2919.34	2943.87	2910.36												66.2	19.7306	17.7919	16.6448	17.4531	16.5327	18.0547
66.4	3015.34	2962.98	2984.41	2915.9	2940.51	2906.71												66.4	18.7337	18.2332	15.7956	17.5526	16.6149	18.5846
66.6	3011.6	2959.24	2981.26	2912.38	2937.27	2902.97												66.6	17.8724	18.0778	15.8635	16.7348	15.5099	18.3258
66.8	3008.21	2955.79	2978.1	2909.24	2934.28	2899.44												66.8	16.3823	17.1007	14.9833	15.1936	14.7639	17.2186
67	3004.99	2952.34	2975.24	2906.23	2931.31	2896.13												67	15.8753	17.4469	14.5829	15.1822	15.1964	15.4436
67.2	3001.78	2948.82	2972.19	2903.2	2928.22	2893.27												67.2	16.9548	17.34	15.7908	14.4	15.3568	13.3501
67.4	2998.21	2945.41	2968.97	2900.47	2925.23	2890.7												67.4	17.9141	17.1085	16.0245	13.4489	14.2308	13.1005
67.6	2994.67	2941.93	2965.81	2897.73	2922.47	2888.02												67.6	17.5693	17.9322	15.5896	14.3095	14.3493	12.8258
67.8	2991.15	2938.24	2962.67	2894.77	2919.47	2885.61												67.8	18.1237	18.6573	16.6256	14.72	14.811	11.3352
68	2987.5	2934.54	2959.22	2891.94	2916.59	2883.39												68	17.3553	17.9675	16.4358	12.9647	14.3561	11.8824
68.2	2984.32	2931.1	2956.15	2889.48	2913.72	2880.79												68.2	14.2753	16.6597	15.0192	13.4496	13.7766	13.8236
68.4	2981.69	2927.91	2953.14	2886.52	2910.97	2877.95												68.4	13.1024	14.8335	15.2845	14.8013	15.4125	13.666
68.6	2978.95	2925.13	2950.04	2883.65	2907.55	2875.32												68.6	14.3558	13.7182	15.385	14.122	17.0979	13.6568
68.8	2975.96	2922.38	2947.02	2880.86	2904.2	2872.4												68.8	15.004	13.2022	14.7233	13.7797	17.4875	15.5998
69	2972.9	2919.82	2944.08	2878.07	2900.6	2869.18												69	16.5067	13.0113	15.6261	15.068	17.1393	15.4382
69.2	2969.29	2917.1	2940.78	2874.91	2897.38	2866.32												69.2	19.4132	14.2172	16.2674	14.6182	16.3837	13.4032
69.4	2965.21	2914.12	2937.63	2872.25	2894.12	2863.71												69.4	20.866	15.5779	15.6638	13.6241	14.4259	13.7271
69.6	2961.05	2910.91	2934.48	2869.4	2891.66	2860.77												69.6	20.6332	16.0457	15.7924	13.8018	11.4149	15.1489
69.8	2957.05	2907.7	2931.34	2866.69	2889.48	2857.68												69.8	18.7934	16.687	15.474	14.5808	9.8556	15.7167
70	2953.5	2904.27	2928.33	2863.55	2887.61	2854.46												70	17.697	16.8945	14.4131	15.6475	9.99269	16.5613
70.2	2949.93	2900.99	2925.53	2860.43	2885.39	2851.02												70.2	17.3115	16.0788	14.1343	16.8689	11.614	18.4347
70.4	2946.61	2897.8	2922.62	2856.87	2882.92	2847.2												70.4	16.0897	16.0092	14.8633	16.8056	13.7879	18.228
70.6	2943.46	2894.56	2919.6	2853.76	2879.86	2843.83												70.6	15.5087	16.5222	15.1985	15.93	16.2192	16.2779
70.8	2940.34	2891.25	2916.52	2850.49	2876.46	2840.71												70.8	16.2456	15.7546	16.1182	15.4197	18.3179	13.9584
71	2937	2888.28	2913.16	2847.63	2872.58	2838.19												71	16.0869	14.6948	16.8658	14.1013	19.6817	12.7094
71.2	2933.92	2885.3	2909.82	2844.89	2868.7	2835.56												71.2	15.648	15.1269	16.7446	11.9659	19.041	12.6006
71.4	2930.71	2882.23	2906.49	2842.75	2865.01	2833.09												71.4	15.8408	15.354	16.1627	11.6223	17.6554	13.3348
71.6	2927.57	2879.19	2903.36	2840.16	2861.6	2830.14												71.6	16.0738	14.9422	15.5608	12.8361	17.1511	15.5083
71.8	2924.24	2876.2	2900.27	2837.68	2858.19	2826.87												71.8	17.1549	15.6023	14.8881	12.5764	15.8748	17.9372
72	2920.73	2872.94	2897.38	2835.1	2855.26	2823.08												72	17.7627	16.4307	14.746	12.9461	14.3373	18.3407
72.2	2917.16	2869.7	2894.38	2832.45	2852.39	2819.65												72.2	17.833	15.8118	14.47	14.3511	13.9335	16.724
72.4	2913.58	2866.63	2891.61	2829.42	2849.65	2816.38												72.4	18.4642	15.1412	13.7375	14.6131	14.2621	15.7299
72.6	2909.82	2863.64	2888.83	2826.68	2846.71	2813.42												72.6	18.3355	14.491	14.2178	13.5131	14.1879	13.5691
72.8	2906.29	2860.82	2885.94	2823.98	2844.03	2810.97												72.8	17.3208	14.0055	14.1622	13.3912	12.8665	11.0527
73	2902.86	2858.03	2883.21	2821.41	2841.52	2808.88												73	17.1185	13.6901	12.8855	11.3379	12.4254	10.8171
73.2	2899.49	2855.3	2880.69	2819.43	2839.02	2806.57												73.2	15.8599	14.2304	13.6618	9.50222	12.8114	11.6563
73.4	2896.53	2852.29	2877.71	2817.5	2836.42	2804.21												73.4	14.2389	15.5122	15.1816	9.83159	12.6174	12.4505
73.6	2893.72	2849.1	2874.72	2815.46	2833.97	2801.58												73.6	14.2223	16.6796	14.358	10.659	12.2575	13.5121
73.8	2890.83	2845.69	2871.93	2813.26	2831.43	2798.81												73.8	14.3772	16.2894	14.4734	10.717	13.7854	14.4499
74	2888	2842.54	2868.87	2811.09	2828.47	2795.84												74	13.5982	17.1351	16.0578	12.4201	14.7926	14.7871
74.2	2885.28	2838.87	2865.63	2808.26	2825.51	2792.96												74.2	15.0608	17.5491	15.1669	14.6674	15.9259	14.2344
74.4	2881.97	2835.65	2862.85	2805.34	2822.14	2790.23												74.4	16.7072	15.2949	13.4644	14.804	16.5284	11.9549
74.6	2878.71	2832.69	2860.13	2802.4	2818.98	2788.12												74.6	15.962	14.4361	14.1913	14.0437	15.5232	10.6351
74.8	2875.57	2829.8	2857.18	2799.72	2815.89	2785.86												74.8	15.6488	15.0445	14.3978	13.4683	15.57	11.4903
75	2872.42	2826.78	2854.38	2797	2812.79	2783.55												75	16.2396	13.3102	14.1697	13.2148	15.0653	11.6194
75.2	2869.16	2824.49	2851.43	2794.43	2809.99	2781.2												75.2	15.1023	11.2059	15.8119	13.034	11.995	11.8252
75.4	2866.38	2822.15	2848.08	2791.8	2807.92	2778.74												75.4	13.8998	12.2484	16.9407	12.4847	10.2834	13.6166
75.6	2863.5	2819.62	2844.76	2789.4	2805.72	2775.81												75.6	14.6156	12.3496	15.9673	12.3291	11.611	14.5325
75.8	2860.56	2817.22	2841.71	2786.79	2803.34	2773.04												75.8	14.6047	12.115	15.0414	13.6776	11.2122	13.1702
76	2857.67	2814.72	2838.74	2783.96	2801.2	2770.49												76	14.3395	12.955	14.2949	14.5085	11.3555	12.9177
76.2	2854.8	2812.03	2836.03	2781.08	2798.7	2767.82												76.2	14.5644	14.098	12.5082	13.4036	13.4369	13.7584
76.4	2851.84	2809.13	2833.68	2778.55	2795.9	2765.04												76.4	15.0823	14.3629	11.8349	13.4388	14.0161	13.3263
76.6	2848.81	2806.34	2831.24	2775.65	2793.15	2762.49												76.6	14.8202	13.722	12.1892	14.8124	13.6239	12.9519
76.8	2845.93	2803.68	2828.77	2772.75	2790.4	2759.83												76.8	14.1736	12.4459	13.0796	13.577	14.4121	13.4097
77	2843.12	2801.32	2826.03	2770.24	2787.41	2757.19												77	13.964	11.9397	13.3821	11.9054	14.5066	12.6076
77.2	2840.34	2798.86	2823.4	2767.9	2784.62	2754.8												77.2	13.9126	12.1316	13.9922	12.1252	14.1276	11.387
77.4	2837.57	2796.47	2820.4	2765.4	2781.71	2752.55												77.4	13.4609	11.9099	15.4012	12.1273	14.9509	11.9037
77.6	2834.92	2794.03	2817.31	2763.1	2778.68	2750.06												77.6	13.5972	12.9134	15.5858	10.8391	15.0208	11.99
77.8	2832.06	2791.26	2814.22	2760.98	2775.79	2747.77												77.8	14.9509	14.822	14.7077	11.2854	13.4055	11.7672
78	2828.94	2788.15	2811.42	2758.54	2773.31	2745.29												78	16.2155	15.8118	14.1974	12.5254	12.1863	12.8598
78.2	2825.61	2785	2808.56	2756.03	2770.89	2742.67												78.2	16.9519	15.6605	13.4513	12.5461	11.5828	13.0754
78.4	2822.21	2781.92	2806.08	2753.59	2768.69	2740.12												78.4	16.7252	15.1135	11.659	11.403	10.4757	12.0875
78.6	2818.93	2778.97	2803.81	2751.44	2766.69	2737.79												78.6	16.5771	14.4134	11.6144	11.0258	9.40122	12.0445
78.8	2815.64	2776.16	2801.42	2749.19	2764.85	2735.28												78.8	15.345	13.6788	11.524	10.3843	9.99175	12.3294
79	2812.83	2773.49	2799.2	2747.32	2762.68	2732.89												79	13.2183	13.0307	11.4651	8.85085	10.7645	11.8463
79.2	2810.26	2770.94	2796.79	2745.56	2760.59	2730.53												79.2	12.8885	12.5216	12.4791	8.91217	10.5087	11.808
79.4	2807.61	2768.48	2794.22	2743.66	2758.44	2728.16												79.4	13.8003	12.0619	13.1276	10.799	10.9323	11.9104
79.6	2804.77	2766.1	2791.58	2741.29	2756.17	2725.75												79.6	13.8057	11.8748	12.882	11.594	12.3349	12.3842
79.8	2802.08	2763.73	2789.04	2739.05	2753.55	2723.27												79.8	13.9098	11.5241	13.3857	11.7921	12.7613	11.5667
80	2799.21	2761.47	2786.26	2736.52	2751.09	2721.14												80	14.0697	11.4306	13.2792	13.3367	12.6949	10.2999
80.2	2796.48	2759.11	2783.78	2733.8	2748.47	2719.06												80.2	13.7561	12.1766	12.1174	13.231	12.9261	10.8026
80.4	2793.73	2756.57	2781.39	2731.29	2745.99	2716.82												80.4	13.0568	13.3971	11.4004	11.8672	11.935	11.3152
80.6	2791.25	2753.79	2779.19	2728.98	2743.73	2714.59												80.6	12.4227	13.8866	11.2004	12.0496	10.3998	10.5148
80.8	2788.65	2751.06	2776.87	2726.44	2741.8	2712.51												80.8	13.8085	13.7247	11.7165	12.7782	9.16568	11.743
81	2785.69	2748.33	2774.48	2723.93	2739.97	2709.85												81	15.7414	13.1674	12.6957	12.316	9.66503	13.8363
81.2	2782.45	2745.81	2771.8	2721.51	2737.92	2707.09												81.2	15.6714	12.2818	13.3512	11.9831	10.2411	13.5522
81.4	2779.41	2743.39	2769.12	2719.1	2735.87	2704.44												81.4	16.0401	11.8867	14.4993	12.3755	10.7655	13.2907
81.6	2776.02	2741.03	2766.04	2716.61	2733.6	2701.76												81.6	16.9079	11.8068	14.8891	11.7805	11.6412	13.4835
81.8	2772.77	2738.64	2763.24	2714.41	2731.23	2699.08												81.8	15.4523	12.12	13.7863	10.8114	12.3729	13.1048
82	2769.85	2736.16	2760.49	2712.27	2728.7	2696.54												82	14.0884	12.8507	13.6254	10.121	12.0196	12.265
82.2	2767.07	2733.5	2757.76	2710.3	2726.37	2694.17												82.2	13.8784	13.5836	13.9698	10.6051	12.615	11.4726
82.4	2764.3	2730.76	2754.93	2708.03	2723.61	2691.98												82.4	13.3687	13.7599	13.6444	11.0806	14.1282	10.2811
82.6	2761.75	2728.04	2752.31	2705.93	2720.78	2690.06												82.6	12.4328	13.3631	13.2979	10.335	14.261	9.09296
82.8	2759.3	2725.44	2749.61	2703.87	2717.9	2688.32												82.8	12.1504	12.5669	13.0784	10.0642	14.8492	8.22174
83	2756.86	2723.01	2747.11	2701.88	2714.88	2686.76												83	12.2317	11.7102	12.1489	10.3055	14.9959	7.41471
83.2	2754.39	2720.74	2744.77	2699.77	2711.99	2685.29												83.2	12.5006	11.0823	10.9948	10.1265	13.4958	7.72521
83.4	2751.85	2718.58	2742.69	2697.84	2709.49	2683.61												83.4	12.9607	10.3363	10.1518	9.69043	11.8727	9.02361
83.6	2749.18	2716.56	2740.65	2695.84	2707.19	2681.66												83.6	13.8678	10.3856	10.2448	10.3334	11.1543	10.7806
83.8	2746.31	2714.37	2738.54	2693.69	2705.01	2679.38												83.8	14.621	11.4753	11.3034	11.1717	10.8118	10.9832
84	2743.38	2711.96	2736.13	2691.36	2702.9	2677.31												84	14.5966	12.6355	12.0745	12.3188	9.67388	10.5211
84.2	2740.47	2709.33	2733.69	2688.83	2701.1	2675.14												84.2	14.736	13.4773	13.4046	11.985	9.09877	10.8269
84.4	2737.51	2706.59	2730.8	2686.59	2699.17	2672.99												84.4	14.4663	14.1653	14.2198	11.1511	10.1506	10.8068
84.6	2734.71	2703.71	2728.07	2684.32	2697.06	2670.83												84.6	13.6378	13.9925	13.7697	11.6385	10.8123	10.2421
84.8	2732.03	2701.03	2725.33	2681.98	2694.92	2668.82												84.8	13.343	13.3416	12.8184	11.3455	9.83664	11.0268
85	2729.36	2698.4	2722.96	2679.87	2693.03	2666.39												85	13.3653	12.3826	11.6621	9.03439	10.942	12.6127
85.2	2726.72	2696.11	2720.69	2678.28	2690.53	2663.89												85.2	12.5571	10.6611	10.0498	8.56281	12.5721	12.0593
85.4	2724.32	2694.11	2718.92	2676.37	2688.17	2661.6												85.4	12.189	9.38608	8.6505	9.64572	10.7246	10.8657
85.6	2721.8	2692.29	2717.14	2674.5	2686.22	2659.5												85.6	12.6619	9.31619	8.79839	8.83068	9.45774	10.6992
85.8	2719.31	2690.4	2715.36	2672.79	2684.28	2657.35												85.8	11.9038	8.64014	9.55309	8.89421	10.4222	9.98686
86	2717.03	2688.81	2713.31	2670.86	2682.08	2655.5												86	11.432	8.26691	10.4097	10.6491	10.3999	9.26144
86.2	2714.72	2686.99	2711.17	2668.57	2680.1	2653.57												86.2	11.2987	10.1016	11.6831	11.6275	10.4646	9.89139
86.4	2712.56	2684.79	2708.62	2666.24	2677.8	2651.51												86.4	10.2117	11.4872	13.3596	11.8618	12.5194	11.0178
86.6	2710.66	2682.48	2705.9	2663.79	2675.14	2649.22												86.6	8.50725	10.9438	13.7584	12.9422	13.7691	10.7952
86.8	2709.08	2680.35	2703.16	2661.08	2672.43	2647.17												86.8	8.464	11.8756	13.305	13.6063	12.5322	11.2406
87	2707.26	2677.7	2700.53	2658.35	2670.15	2644.76												87	8.50203	13.5328	13.9301	14.1799	11.1721	11.1973
87.2	2705.64	2675.06	2697.62	2655.45	2667.96	2642.74												87.2	9.07637	12.7552	13.9179	14.1723	9.68165	10.3079
87.4	2703.58	2672.62	2695.02	2652.78	2666.25	2640.63												87.4	10.6242	11.6654	12.6967	12.3429	8.54286	9.62905
87.6	2701.41	2670.32	2692.51	2650.51	2664.48	2638.9												87.6	11.7361	12.1492	12.3174	10.8913	8.50639	8.69572
87.8	2698.93	2667.8	2690.09	2648.45	2662.78	2637.14												87.8	12.1733	11.9743	12.2132	8.94462	9.72514	7.85563
88	2696.6	2665.61	2687.69	2646.94	2660.58	2635.71												88	11.7521	10.2112	10.7375	6.79405	10.974	7.79811
88.2	2694.26	2663.67	2685.77	2645.63	2658.41	2634												88.2	10.7737	9.23806	9.71748	6.45621	11.8277	8.00185
88.4	2692.28	2661.82	2683.73	2644.26	2655.9	2632.46												88.4	9.795	9.82772	9.93883	7.64553	11.7838	9.07957
88.6	2690.25	2659.71	2681.77	2642.57	2653.73	2630.32												88.6	10.641	10.7979	10.4514	8.53417	11.3042	11.1504
88.8	2688.01	2657.52	2679.53	2640.8	2651.36	2628.09												88.8	11.5219	11.2115	11.2846	10.4304	11.2708	11.2798
89	2685.66	2655.17	2677.24	2638.41	2649.23	2625.81												89	11.8532	12.7915	12.29	12.0892	10.9925	11.5487
89.2	2683.25	2652.4	2674.6	2636.01	2646.97	2623.44												89.2	12.6161	14.5985	13.5863	12.939	10.4901	12.7731
89.4	2680.64	2649.44	2671.84	2633.23	2645	2620.82												89.4	13.275	14.3568	14.3917	14.1506	10.84	11.5758
89.6	2678.06	2646.71	2668.92	2630.4	2642.66	2618.85												89.6	11.5997	13.3475	13.9695	14.3855	10.7649	9.67826
89.8	2676	2644.08	2666.27	2627.54	2640.77	2616.85												89.8	9.86199	12.9705	13.3251	13.5338	9.1117	9.9179
90	2674	2641.58	2663.59	2625.02	2638.97	2614.92												90	10.6117	11.2692	12.7593	12.3801	8.5452	9.18115
90.2	2671.76	2639.57	2661.21	2622.66	2637.31	2613.22												90.2	10.9015	9.59892	11.0972	9.83928	8.64213	7.60935
90.4	2669.67	2637.67	2659.07	2621.08	2635.55	2611.78												90.4	10.4316	9.42056	11.0274	7.20275	7.7111	7.88348
90.6	2667.52	2635.81	2656.78	2619.64	2634.17	2610.01												90.6	11.4906	9.03143	11.3859	7.19222	7.71697	8.99727
90.8	2665.09	2634.06	2654.58	2618.15	2632.36	2608.23												90.8	12.2236	8.37706	10.4224	7.95061	9.92731	9.07592
91	2662.71	2632.39	2652.58	2616.45	2630.26	2606.37												91	11.3783	9.07287	10.1623	8.51352	10.7588	9.42611
91.2	2660.54	2630.43	2650.47	2614.67	2628.06	2604.45												91.2	10.4894	9.58981	10.9726	10.5594	11.5025	9.95395
91.4	2658.48	2628.56	2648.31	2612.25	2625.62	2602.39												91.4	10.4762	9.92882	9.06116	12.2978	13.2003	10.6136
91.6	2656.38	2626.43	2646.82	2609.9	2622.83	2600.22												91.6	9.87468	11.0346	7.71958	11.2426	13.9719	10.9851
91.8	2654.52	2624.18	2645.12	2607.76	2620.14	2598.02												91.8	9.53339	11.4429	8.50141	10.4347	12.5474	10.8625
92	2652.54	2621.91	2643.43	2605.71	2617.78	2595.86												92	9.48287	10.7159	8.6516	10.0858	12.1502	11.1094
92.2	2650.7	2619.88	2641.62	2603.78	2615.28	2593.58												92.2	9.7643	10.3305	9.45567	8.50389	11.701	11.4055
92.4	2648.62	2617.77	2639.58	2602.29	2613.14	2591.37												92.4	10.3124	10.1834	11.7404	7.25487	10.2101	10.2229
92.6	2646.56	2615.85	2637	2600.8	2611.15	2589.49												92.6	11.1146	9.09318	12.5686	7.59904	9.61858	9.03783
92.8	2644.19	2614.1	2634.62	2599.26	2609.22	2587.69												92.8	11.7126	8.61148	12.2282	7.27107	10.6333	9.29365
93	2641.92	2612.33	2632.12	2597.84	2606.97	2585.8												93	11.598	9.47795	12.0246	7.79498	10.0985	9.01174
93.2	2639.55	2610.28	2629.91	2596.08	2605.24	2584.14												93.2	11.7235	10.7681	9.94132	9.6305	8.36023	7.40596
93.4	2637.29	2608.06	2628.11	2594.07	2603.57	2582.75												93.4	10.5674	11.3989	8.43526	9.93596	8.0661	7.54001
93.6	2635.33	2605.76	2626.44	2592.18	2602.02	2581.09												93.6	9.27852	11.495	8.68733	8.97418	7.46864	8.29731
93.8	2633.56	2603.47	2624.62	2590.46	2600.57	2579.5												93.8	8.43838	11.4637	8.94774	8.79205	6.70653	7.67658
94	2631.95	2601.19	2622.84	2588.71	2599.21	2578.01												94	7.76044	11.3443	9.51641	7.6972	8.2655	7.35885
94.2	2630.46	2599.03	2620.8	2587.39	2597.16	2576.48												94.2	6.82751	9.21874	10.5644	6.36648	11.8225	8.68917
94.4	2629.17	2597.46	2618.68	2586.11	2594.54	2574.63												94.4	6.86111	7.84779	10.2329	5.93987	13.983	7.92812
94.6	2627.71	2595.81	2616.71	2584.99	2591.58	2573.34												94.6	6.91415	8.01523	10.1145	5.87326	16.0955	6.94407
94.8	2626.39	2594.22	2614.69	2583.8	2588.16	2571.91												94.8	7.70768	9.42607	9.54471	5.37188	18.6461	5.09985
95	2624.86	2592.34	2613.16	2582.99	2584.76	2571.41												95	3.94179	4.82898	3.6397	1.86977	8.47893	0.873151

## Sheet: rep 2
	Melt Curves	2019-04-17						2019-04-30		2019-05-13					Melt Curve Derivative
	Temperature	5 uM IRE1 wt 2042	5 uM wt + 62.5 uM MPZN	5 uM wt + 125 uM MPZN	5 uM wt + 250 uM MPZN	5 uM wt + 500 uM MPZN	5 uM wt + 1000 uM MPZN	5 uM IRE1 P108A 2410	5 uM IRE1 W125A 2411	5 uM 2045 IRE1 Q105C ox	5 uM 2045 IRE1 Q105C ox +DTT				Temperature	5 uM IRE1 wt 2042	5 uM wt + 62.5 uM MPZN	5 uM wt + 125 uM MPZN	5 uM wt + 250 uM MPZN	5 uM wt + 500 uM MPZN	5 uM wt + 1000 uM MPZN	5 uM IRE1 P108A 2410	5 uM IRE1 W125A 2411	5 uM 2045 IRE1 Q105C ox	5 uM 2045 IRE1 Q105C ox +DTT
	20	3534.06	3480.22	3245.14	3648.67	3606.2	3788.68	3499.92	3002.1	2949.87	2903.03				20	24.6413	24.8043	18.9687	31.3902	26.8551	31.7196	22.5673	21.3332	20.6871	18.3222
	20.2	3524.21	3470.3	3237.56	3636.12	3595.46	3775.99	3490.89	2993.57	2941.59	2895.7				20.2	53.3894	53.7428	41.0988	68.0121	58.186	68.7257	48.8958	46.2219	44.8221	39.6981
	20.4	3514.35	3460.38	3229.97	3623.56	3584.72	3763.3	3481.86	2985.03	2933.32	2888.37				20.4	49.2825	49.6087	37.9373	62.7804	53.7102	63.4391	45.1346	42.6663	41.3743	36.6444
	20.6	3504.49	3450.45	3222.38	3611.01	3573.98	3750.61	3472.83	2976.5	2925.04	2881.04				20.6	49.2825	49.6087	37.9373	62.7804	53.7102	63.4391	45.1346	42.6663	41.3743	36.6444
	20.8	3494.64	3440.53	3214.79	3598.45	3563.23	3737.92	3463.81	2967.97	2916.77	2873.71				20.8	49.2825	49.6087	37.9373	62.7804	53.7102	63.4391	45.1346	42.6663	41.3743	36.6444
	21	3484.78	3430.61	3207.21	3585.89	3552.49	3725.24	3454.78	2959.43	2908.49	2866.39				21	49.4642	49.8557	38.0987	63.3723	53.9403	63.8835	45.4713	42.925	41.4988	36.895
	21.2	3474.92	3420.69	3199.62	3573.34	3541.75	3712.55	3445.75	2950.9	2900.22	2859.06				21.2	48.3485	48.1209	37.0173	59.6845	52.3942	61.0875	43.3916	41.3533	40.7199	35.3082
	21.4	3465.5	3411.36	3192.42	3562.2	3531.56	3700.93	3437.54	2942.99	2892.24	2852.33				21.4	46.0598	46.6837	35.7448	52.6924	50.4045	55.8336	39.2651	38.1017	39.2096	32.4595
	21.6	3456.46	3402.02	3185.33	3552.16	3521.53	3690.06	3429.98	2935.65	2884.49	2846				21.6	44.7711	45.5535	34.4416	48.0115	49.9005	53.8812	36.6097	35.2739	38.6159	31.069
	21.8	3447.6	3393.29	3178.71	3542.93	3511.68	3679.33	3422.84	2928.87	2876.77	2839.86				21.8	43.3275	41.2924	31.7901	44.4217	47.843	52.4584	34.8847	32.6603	38.7657	30.5757
	22	3439.14	3385.42	3172.62	3534.37	3502.46	3669.08	3416.02	2922.59	2869.08	2833.87				22	41.8549	38.8647	29.0927	40.858	44.2665	50.8478	32.9109	29.7029	37.0237	28.0263
	22.2	3430.91	3377.68	3166.98	3526.49	3493.87	3659	3409.59	2916.88	2862.02	2828.65				22.2	39.4432	37.4946	28.3445	38.8929	42.9262	48.9992	32.3909	28.645	33.9652	25.3885
	22.4	3423.39	3370.48	3161.28	3518.76	3485.3	3649.45	3403	2911.07	2855.39	2823.57				22.4	36.4248	34.7944	27.405	37.9876	41.348	47.887	33.1114	28.6538	32.9978	25.5184
	22.6	3416.32	3363.73	3156.08	3511.38	3477.41	3639.89	3396.41	2905.48	2848.79	2818.42				22.6	33.8334	32.7522	25.1189	35.2273	38.1047	45.9113	32.5029	27.3685	32.7063	25.6956
	22.8	3409.82	3357.31	3151.19	3504.62	3469.97	3631.15	3390.06	2900.12	2842.39	2813.31				22.8	31.9781	31.9188	23.8361	33.3335	36.494	42.6721	30.7956	26.2706	30.755	25.2243
	23	3403.52	3350.96	3146.49	3497.96	3462.71	3622.77	3384.03	2894.98	2836.49	2808.23				23	30.0562	31.0906	23.4851	33.2733	36.9188	40.4589	30.4621	25.1363	28.5349	26.8678
	23.2	3397.78	3344.88	3141.82	3491.36	3455.33	3614.89	3377.88	2890.15	2830.86	2802.57				23.2	28.2627	30.1032	22.5459	32.0302	34.806	39.7064	29.9187	22.4059	28.7636	28.5315
	23.4	3392.16	3338.92	3137.5	3485.17	3448.85	3606.91	3372.1	2886.03	2824.98	2796.98				23.4	27.6697	29.225	20.8426	30.2665	31.5076	38.4928	28.4372	19.3846	29.0849	27.1711
	23.6	3386.75	3333.25	3133.4	3479.23	3442.65	3599.55	3366.44	2882.26	2819.32	2791.75				23.6	26.3951	27.3615	20.8512	29.3393	29.8857	36.0183	28.1617	18.9473	27.352	25.3519
	23.8	3381.66	3328.05	3129.12	3473.5	3436.87	3592.44	3360.77	2878.37	2814.04	2786.84				23.8	23.9448	24.2089	21.5237	26.9834	28.5753	34.8976	29.2454	19.6148	25.6421	23.5074
	24	3377.17	3323.58	3124.83	3468.41	3431.19	3585.6	3354.79	2874.35	2808.98	2782.35				24	21.5703	20.8356	21.5132	25.067	27.6371	33.5952	29.2528	21.208	25.7447	21.4918
	24.2	3372.96	3319.63	3120.6	3463.39	3425.77	3579.06	3349.12	2869.81	2803.77	2778.24				24.2	20.635	18.9676	19.7737	24.831	27.3268	30.9941	28.3529	24.1465	25.2408	19.6455
	24.4	3368.89	3315.93	3116.84	3458.46	3420.2	3573.15	3343.44	2864.7	2798.94	2774.47				24.4	19.9638	17.9605	19.9125	24.5943	28.1729	29.4462	27.9462	26.936	23.3245	18.0932
	24.6	3364.97	3312.36	3112.68	3453.54	3414.57	3567.23	3338.02	2859.12	2794.33	2770.9				24.6	19.2564	18.3913	19.4041	24.4157	27.676	29.0008	26.0072	28.2952	23.4717	18.4428
	24.8	3361.13	3308.5	3109.22	3448.67	3409.18	3561.59	3333.08	2853.45	2789.47	2767.06				24.8	19.3483	19.9875	15.9513	25.0498	26.3917	27.5476	23.4042	28.8324	25.354	19.3843
	25	3357.11	3304.38	3106.2	3443.6	3404.03	3556.16	3328.6	2847.71	2784.28	2763.22				25	21.741	21.131	14.4964	24.2411	24.9517	26.9084	22.2141	27.2795	25.2477	18.4807
	25.2	3352.5	3300.05	3103.28	3439.04	3399.19	3550.74	3324.21	2842.6	2779.42	2759.6				25.2	22.9455	22.3965	15.6429	21.9747	23.7393	28.0452	20.3984	24.6332	24.2564	18.9107
	25.4	3348.07	3295.43	3099.97	3434.74	3394.53	3545.01	3320.42	2837.8	2774.51	2755.62				25.4	21.4188	23.7223	15.8085	21.1358	22.2811	27.4754	18.6359	23.14	24.8049	20.1474
	25.6	3343.83	3290.65	3096.94	3430.56	3390.18	3539.72	3316.59	2833.35	2769.52	2751.66				25.6	22.2163	23.799	15.9873	20.7183	22.5961	27.346	20.3145	21.4183	24.8424	19.0447
	25.8	3339.16	3286.15	3093.44	3426.46	3385.44	3533.96	3312.31	2829.24	2764.67	2748				25.8	23.4836	19.7172	19.0578	20.0239	23.8011	29.651	21.5596	19.2752	22.9029	18.1948
	26	3334.59	3282.96	3089.41	3422.51	3380.69	3527.95	3308.1	2825.52	2760.3	2744.32				26	21.6156	12.5395	20.2562	20.2246	24.3205	30.1866	19.9136	19.4315	22.3268	18.7885
	26.2	3330.51	3281.25	3085.46	3418.37	3375.7	3522.01	3304.24	2821.45	2755.68	2740.59				26.2	19.9558	3.65077	19.3301	20.366	25.1617	28.2136	20.4659	19.9738	23.1408	16.9986
	26.4	3326.48	3281.57	3081.73	3414.42	3370.65	3516.58	3299.84	2817.64	2751.15	2737.5				26.4	21.0748	-6.40257	17.5717	19.2994	25.6647	28.1522	22.6065	18.3725	21.6025	15.6364
	26.6	3322.16	3283.77	3078.41	3410.62	3365.49	3510.75	3295.36	2814.13	2747.07	2734.23				26.6	20.4351	-16.4951	16.3802	18.9361	25.1189	28.3512	21.2753	16.5677	19.359	16.425
	26.8	3318.39	3287.71	3075.18	3406.81	3360.63	3505.37	3291.32	2811.02	2743.32	2730.98				26.8	17.9977	-18.8584	15.0982	19.1012	24.174	25.8236	20.2725	14.8264	19.0806	16.1312
	27	3314.91	3290.79	3072.38	3402.98	3355.85	3500.35	3287.16	2808.23	2739.43	2727.83				27	16.7099	-12.3431	13.6241	19.1476	22.9049	24.8333	21.1669	12.2866	18.8877	14.7102
	27.2	3311.62	3292.48	3069.69	3399.1	3351.5	3495.36	3282.89	2806.08	2735.81	2724.98				27.2	17.0972	-3.79437	12.8709	20.4151	21.0127	25.3531	21.2687	10.0249	17.4976	15.6649
	27.4	3308.1	3292.29	3067.17	3394.86	3347.38	3490.22	3278.76	2804.12	2732.36	2721.55				27.4	16.7744	4.63441	13.0738	20.833	20.3045	25.1756	19.2001	9.59977	17.56	16.842
	27.6	3304.94	3290.59	3064.46	3390.86	3343.3	3485.25	3275.15	2802.15	2728.75	2718.35				27.6	15.5808	14.1445	13.3141	19.5161	20.9002	25.5855	18.5842	10.5859	18.3272	15.691
	27.8	3301.72	3286.8	3061.89	3387.06	3338.99	3479.93	3271.31	2799.83	2725.12	2715.23				27.8	17.3139	21.0925	12.7335	18.2855	21.7213	27.3429	18.1363	12.4868	17.3079	15.4875
	28	3297.97	3282.54	3059.34	3383.53	3334.59	3474.37	3267.88	2797.16	2721.87	2712.06				28	19.8521	21.0828	12.739	17.295	22.9487	27.8199	18.0318	14.2188	15.6772	17.2477
	28.2	3293.91	3278.52	3056.76	3380.1	3329.81	3468.78	3264.08	2794.18	2718.82	2708.41				28.2	19.6342	18.8847	13.3711	16.811	24.4865	28.894	18.1851	15.3082	14.6585	17.4616
	28.4	3290.13	3274.95	3053.99	3376.72	3324.88	3462.84	3260.58	2791.13	2716	2705.16				28.4	19.4084	18.0133	14.0109	17.8853	24.4969	29.5256	18.8186	14.8062	13.6235	16.0499
	28.6	3286.11	3271.35	3051.2	3372.94	3320.13	3457.1	3256.58	2788.34	2713.33	2701.95				28.6	20.1704	16.4941	13.5143	18.8872	22.3931	27.7207	18.9749	12.9661	13.1775	15.6548
	28.8	3282.16	3268.38	3048.55	3369.2	3315.93	3451.77	3253.08	2785.95	2710.64	2698.92				28.8	18.8763	13.9084	13.7533	19.2198	20.337	25.548	17.5623	11.1696	14.1996	14.8504
	29	3278.56	3265.62	3045.65	3365.26	3311.93	3446.74	3249.58	2783.85	2707.62	2696.03				29	17.4362	14.2697	14.7384	19.5802	19.2667	25.8129	15.6025	9.36387	15.4506	13.3882
	29.2	3274.99	3262.5	3042.6	3361.37	3308.12	3441.34	3246.72	2782.04	2704.35	2693.44				29.2	19.4486	17.4724	16.2878	19.5311	19.4326	27.6217	15.4325	10.103	18.5044	13.9366
	29.4	3270.6	3258.51	3039.02	3357.32	3303.94	3435.57	3243.18	2779.5	2700.05	2690.27				29.4	24.1112	22.3307	19.5993	21.2837	23.1848	31.1993	19.0388	16.0985	24.4283	17.5719
	29.6	3265.23	3253.44	3034.57	3352.56	3298.61	3428.68	3238.96	2775.4	2694.53	2686.28				29.6	30.5454	29.1315	26.2656	28.2567	30.8622	37.9082	24.3931	25.1635	30.7379	23.1832
	29.8	3258.3	3246.74	3028.43	3345.82	3291.48	3420.32	3233.2	2769.38	2687.72	2680.88				29.8	38.4828	38.1266	34.1937	38.6925	40.1095	46.0769	33.5944	34.7226	37.6752	30.6878
	30	3249.87	3238.24	3020.92	3337.16	3282.56	3410.31	3225.41	2761.43	2679.42	2673.97				30	45.9169	46.2565	41.5776	47.3647	49.5423	53.2312	45.1037	46.0185	45.9135	38.8606
	30.2	3240.13	3228.43	3011.86	3327	3271.81	3399.19	3215.39	2751.11	2669.59	2665.5				30.2	50.2891	51.2763	48.549	54.1615	56.8758	57.6742	52.6615	55.3702	50.1174	44.4078
	30.4	3230.06	3217.97	3001.76	3315.72	3260.1	3387.41	3204.7	2739.73	2659.75	2656.51				30.4	49.5796	52.6056	51.3005	57.7095	59.6895	59.7449	53.9962	57.018	47.8328	45.001
	30.6	3220.52	3207.61	2991.71	3304.32	3248.28	3375.54	3193.95	2728.67	2650.65	2647.77				30.6	45.5652	50.6336	47.9463	54.687	56.891	57.749	53.7872	53.228	43.2856	41.4147
	30.8	3211.95	3197.97	2982.84	3294.17	3237.6	3364.51	3183.47	2718.7	2642.63	2640.15				30.8	39.9487	44.4394	40.6916	46.3346	50.1732	52.6274	49.0172	45.8546	35.8717	34.9575
	31	3204.59	3189.97	2975.54	3285.8	3228.34	3354.59	3174.61	2710.56	2636.46	2633.98				31	33.4102	36.0649	32.1339	38.3182	41.6084	46.1249	39.4554	34.4877	25.3702	25.2776
	31.2	3198.56	3183.5	2970.11	3278.8	3220.98	3346.1	3167.62	2704.96	2632.36	2630.08				31.2	27.1203	28.6829	20.9039	30.8656	32.7748	38.8964	31.7094	21.9761	17.2168	14.6278
	31.4	3193.59	3178.4	2967.04	3273.37	3215.16	3338.98	3161.85	2701.56	2629.4	2627.92				31.4	23.6771	23.064	12.0244	24.6442	24.7642	32.4505	25.2667	13.2785	12.1329	7.85354
	31.6	3189.03	3174.22	2964.99	3268.84	3210.88	3332.95	3157.51	2699.42	2627.43	2626.76				31.6	21.2886	18.0913	8.64633	20.2372	19.9845	29.0657	18.4102	8.17555	7.74067	4.07915
	31.8	3185.12	3171.06	2963.44	3265.2	3207.02	3327.31	3154.33	2698.12	2626.18	2626.27				31.8	17.6631	14.6392	7.16641	16.8112	17.6207	26.1971	14.2823	5.61581	5.37085	-0.0310773
	32	3181.92	3168.22	2962.05	3261.97	3203.81	3322.54	3151.69	2697.06	2625.2	2626.67				32	14.9551	13.6945	6.46296	15.888	15.0903	21.7335	12.0011	4.97141	4.49095	-2.39779
	32.2	3179.11	3165.53	2960.71	3258.78	3200.87	3318.54	3149.56	2696.1	2624.39	2627.07				32.2	12.9109	13.4361	8.55515	16.082	14.7125	19.0224	8.68794	4.6151	3.04958	-1.76687
	32.4	3176.82	3162.86	2958.66	3255.61	3197.86	3314.91	3148.14	2695.2	2623.91	2627.42				32.4	9.4097	12.6437	10.2079	14.6192	15.5347	16.5831	6.90829	4.45835	2.84953	-2.50302
	32.6	3175.31	3160.48	2956.84	3252.9	3194.71	3311.93	3146.79	2694.37	2623.21	2628.07				32.6	6.50754	11.753	7.76276	13.6787	15.1375	13.3483	5.17951	3.3117	3.30812	-3.28427
	32.8	3174.1	3158.14	2955.58	3250.05	3191.84	3309.47	3146.11	2693.92	2622.6	2628.66				32.8	5.75619	11.4072	5.2716	14.5442	14.1045	11.9572	2.45337	1.40529	3.39939	-2.61208
	33	3172.97	3155.94	2954.69	3247.13	3189.05	3307.02	3145.78	2693.76	2621.83	2629.08				33	5.42442	10.5159	3.62956	14.3808	13.6713	12.7653	0.21541	0.425994	3.95779	-1.40848
	33.2	3171.87	3153.95	2954.16	3244.29	3186.43	3304.37	3145.92	2693.66	2621.04	2629.2				33.2	5.85141	9.23027	1.09795	14.2549	12.0466	13.256	-0.296799	1.07335	4.13261	0.0544132
	33.4	3170.54	3152.21	2954.2	3241.38	3184.23	3301.77	3145.8	2693.35	2620.21	2629.04				33.4	7.84107	8.68212	-0.73301	15.1245	10.528	12.8804	0.911964	0.917289	3.693	1.89043
	33.6	3168.71	3150.41	2954.27	3238.3	3182.16	3299.23	3145.56	2693.26	2619.56	2628.49				33.6	10.0924	9.29794	0.81881	14.9161	10.0211	12.2409	1.78473	1.14689	3.40823	2.63956
	33.8	3166.48	3148.48	2953.84	3235.46	3180.18	3296.83	3145.1	2692.79	2618.85	2627.94				33.8	12.6893	9.89133	2.70507	13.8901	10.0309	12.4569	2.25486	3.58938	3.08857	4.49544
	34	3163.67	3146.46	2953.22	3232.76	3178.09	3294.22	3144.63	2691.86	2618.32	2626.73				34	14.9079	10.5046	3.91455	12.7614	11.0233	13.0777	3.44441	5.21356	2.66767	5.78244
	34.2	3160.63	3144.33	2952.23	3230.4	3175.76	3291.57	3143.78	2690.77	2617.72	2625.73				34.2	15.25	10.1692	6.01533	10.7958	12.037	13.957	3.99569	5.65482	3.41968	5.06593
	34.4	3157.62	3142.4	2950.83	3228.39	3173.3	3288.54	3143.21	2689.62	2616.92	2624.68				34.4	14.6916	9.77271	7.77052	9.64366	12.5378	16.737	1.18074	5.9524	4.74504	5.07523
	34.6	3154.74	3140.39	2949.19	3226.42	3170.75	3284.92	3143.29	2688.41	2615.84	2623.69				34.6	14.6083	9.89802	8.19104	10.6059	13.3247	18.6662	-1.08651	5.99776	5.62466	5.40222
	34.8	3151.84	3138.42	2947.54	3224.11	3168.04	3281.22	3143.58	2687.33	2614.7	2622.64				34.8	13.4116	10.2025	9.2516	12.0872	12.8808	17.8017	-2.01855	3.96255	5.80035	3.05024
	35	3149.43	3136.28	2945.53	3221.65	3165.66	3277.8	3144.11	2686.81	2613.51	2622.4				35	10.966	11.0256	9.77532	12.358	11.153	17.4963	-3.46682	2.3711	6.35069	2.26025
	35.2	3147.33	3133.96	2943.74	3219.19	3163.52	3274.28	3144.95	2686.3	2612.17	2621.66				35.2	10.9376	12.9968	8.1941	12.5063	10.7273	16.2291	-4.66227	2.09147	6.85766	2.97484
	35.4	3144.98	3131.18	2942.26	3216.68	3161.32	3271.4	3145.92	2685.9	2610.82	2621.26				35.4	12.4473	13.1153	6.75368	12.18	11.3846	13.0959	-4.5343	3.0342	6.20019	2.45662
	35.6	3142.45	3128.81	2941.02	3214.37	3159.06	3268.96	3146.81	2685.07	2609.67	2620.64				35.6	11.7006	11.581	5.73079	10.8113	9.94743	11.7074	-5.45124	4.08094	5.88945	2.57524
	35.8	3140.29	3126.54	2939.99	3212.33	3157.28	3266.66	3148.14	2684.26	2608.4	2620.13				35.8	11.058	10.3925	3.88104	9.87765	9.72088	11.1195	-7.16893	5.14917	7.06274	4.80596
	36	3137.94	3124.67	2939.39	3210.36	3155.09	3264.49	3149.69	2683	2606.89	2618.77				36	12.5806	8.787	3.3087	9.85384	11.1369	10.668	-8.88342	6.77271	7.37131	5.91556
	36.2	3135.36	3123	2938.54	3208.35	3152.95	3262.36	3151.77	2681.65	2605.49	2617.85				36.2	11.9346	7.36248	5.12014	10.2774	9.77904	10.7792	-12.0427	6.633	6.93956	5.32585
	36.4	3133.22	3121.61	2937.33	3206.2	3151.18	3260.17	3154.49	2680.45	2604.13	2616.65				36.4	10.1405	7.93256	6.81229	11.6876	8.31632	11.0452	-15.0411	4.55242	6.25221	4.88801
	36.6	3131.22	3119.74	2935.84	3203.66	3149.47	3257.94	3157.66	2679.84	2603.02	2615.93				36.6	10.2529	10.2434	8.10203	13.4558	10.1443	11.2644	-15.6331	2.49296	5.06321	3.9105
	36.8	3129.13	3117.56	2934.11	3200.88	3147.17	3255.63	3160.71	2679.4	2602.15	2615.1				36.8	9.98538	11.6375	9.21065	13.8965	10.7615	12.3517	-15.6994	1.4987	3.10438	2.6126
	37	3127.22	3115.17	2932.22	3198.1	3145.22	3253.06	3164.01	2679.24	2601.75	2614.89				37	9.58042	11.3386	9.12423	14.5347	10.408	12.096	-17.224	0.364336	1.74743	1.08032
	37.2	3125.22	3113.04	2930.52	3195.08	3143.02	3250.79	3167.61	2679.23	2601.39	2614.59				37.2	10.7591	11.1095	7.99965	14.9854	10.5443	11.8838	-18.8549	-0.474934	1.29698	1.11445
	37.4	3122.97	3110.75	2929.02	3192.19	3141.25	3248.26	3171.52	2679.33	2601.15	2614.41				37.4	10.687	10.6324	7.09808	13.9089	6.10724	12.7375	-19.6185	0.399534	2.25259	1.48634
	37.6	3120.95	3108.83	2927.67	3189.55	3140.73	3245.75	3175.56	2679.03	2600.43	2613.96				37.6	10.5907	9.07415	6.48783	12.4257	-0.905157	12.5509	-22.2049	2.04623	4.15425	2.48388
	37.8	3118.66	3107.06	2926.4	3187.19	3141.54	3243.3	3180.53	2678.58	2599.48	2613.39				37.8	12.152	8.60669	6.08392	11.594	-6.19906	11.2023	-27.2601	2.45977	5.9885	3.92476
	38	3116.16	3105.28	2925.18	3184.93	3143.17	3241.25	3186.37	2678.11	2598.07	2612.4				38	12.0453	10.1962	6.64861	10.3218	-11.3734	10.3258	-30.2808	1.59047	7.24601	5.11807
	38.2	3113.87	3103.02	2923.72	3183.03	3145.88	3239.15	3192.51	2677.89	2596.64	2611.4				38.2	11.6186	10.6849	7.66781	9.58162	-13.2424	9.98556	-30.868	2.08195	7.66853	5.23188
	38.4	3111.46	3101.04	2922.15	3181.04	3148.1	3237.3	3198.77	2677.32	2595.03	2610.29				38.4	12.515	10.7254	8.17941	9.857	-8.55589	8.53067	-32.9302	1.90811	7.68854	5.98237
	38.6	3108.96	3098.73	2920.53	3179.07	3149.19	3235.69	3205.66	2677.21	2593.6	2609.02				38.6	11.5113	11.0624	6.95136	10.3775	-2.47397	7.90042	-34.6815	-0.0435464	6.98709	6.50605
	38.8	3106.92	3096.68	2919.33	3176.89	3149.12	3234.07	3212.55	2677.27	2592.23	2607.74				38.8	9.30973	9.95926	6.60147	10.8188	2.77236	8.61055	-34.3508	-0.717626	6.48737	5.99097
	39	3105.16	3094.75	2917.87	3174.75	3148.07	3232.29	3219.49	2677.43	2591	2606.61				39	8.67054	8.85787	6.80106	11.1471	8.52947	8.5509	-35.7096	-0.0791008	6.06822	5.89314
	39.2	3103.46	3093.09	2916.69	3172.43	3145.86	3230.69	3226.94	2677.35	2589.81	2605.36				39.2	7.74953	8.79616	5.3427	11.5094	11.7953	7.67434	-39.1443	-0.620887	5.64985	6.21663
	39.4	3102.03	3091.2	2915.72	3170.18	3143.59	3229.17	3235.15	2677.67	2588.78	2604.16				39.4	7.17925	9.11698	4.07486	11.3344	10.8581	7.83132	-42.4201	-0.968927	4.4008	5.71212
	39.6	3100.47	3089.42	2914.92	3167.92	3141.57	3227.6	3243.89	2677.69	2588.02	2603.13				39.6	8.79826	9.48704	5.58261	10.7011	9.30886	7.19255	-45.3034	-0.156903	3.73583	4.24853
	39.8	3098.48	3087.34	2913.52	3165.89	3139.84	3226.32	3253.24	2677.78	2587.27	2602.43				39.8	10.8847	11.3978	6.12441	10.088	8.51438	5.90203	-47.7697	-0.374682	3.20277	3.40401
	40	3096.17	3084.92	2912.54	3163.83	3138.22	3225.16	3262.91	2677.9	2586.72	2601.71				40	11.7367	12.0806	5.17921	10.6956	6.47487	6.13752	-48.6233	-1.7379	3.07491	3.67649
	40.2	3093.82	3082.54	2911.39	3161.64	3137.19	3223.84	3272.64	2678.49	2586.03	2600.98				40.2	12.0424	12.3162	5.59503	10.7536	5.49109	6.7943	-48.678	-3.17448	3.19865	3.55525
	40.4	3091.37	3080	2910.31	3159.56	3135.87	3222.46	3282.4	2679.19	2585.44	2600.3				40.4	12.3396	12.6057	5.89628	10.1657	7.34573	6.92963	-49.2692	-4.95646	3.20686	2.92886
	40.6	3088.93	3077.54	2909.08	3157.55	3134.26	3221.04	3292.4	2680.46	2584.77	2599.72				40.6	11.9062	12.0362	5.18081	10.1691	8.78278	7.71921	-50.709	-6.38104	2.66248	4.10139
	40.8	3086.65	3075.24	2908.21	3155.5	3132.43	3219.39	3302.72	2681.71	2584.36	2598.68				40.8	10.5809	10.4333	5.05615	10.1743	8.66467	8.39976	-52.5184	-7.24197	2.59746	5.03865
	41	3084.68	3073.32	2907.02	3153.54	3130.76	3217.77	3313.48	2683.36	2583.73	2597.81				41	9.64913	9.9448	5.61514	8.79692	9.56357	7.41382	-55.676	-8.44066	2.44583	3.87285
	41.2	3082.75	3071.22	2905.94	3151.92	3128.67	3216.45	3325.01	2685.07	2583.37	2597.09				41.2	9.74185	10.1622	6.40148	8.55431	9.40163	6.03043	-59.1048	-9.2664	2.28637	3.5256
	41.4	3080.82	3069.24	2904.44	3150.07	3127.13	3215.36	3337.06	2687.05	2582.73	2596.32				41.4	8.9784	10.3508	7.78275	9.22695	6.59062	4.74259	-61.3702	-9.63907	3.98934	4.78145
	41.6	3079.18	3067.05	2902.9	3148.28	3125.96	3214.6	3349.54	2688.95	2581.8	2595.28				41.6	7.61895	11.0341	7.75971	8.8511	5.34864	2.66893	-63.6	-10.5213	5.12209	3.85364
	41.8	3077.7	3064.83	2901.38	3146.51	3124.87	3214.29	3362.47	2691.26	2580.75	2594.79				41.8	7.74212	11.7057	7.02901	9.01287	6.47066	0.702407	-65.3699	-11.6249	4.75721	2.76919
	42	3076.06	3062.42	2900.09	3144.66	3123.4	3214.28	3375.62	2693.55	2579.88	2594.08				42	8.31852	11.6531	6.33533	9.51497	6.63193	-0.581202	-65.9037	-11.6424	4.91583	3.45305
	42.2	3074.41	3060.27	2898.83	3142.76	3122.2	3214.51	3388.78	2695.96	2578.81	2593.41				42.2	8.01322	9.73945	5.86508	8.75977	7.0726	-1.74585	-65.8152	-12.3457	4.78306	4.00144
	42.4	3072.83	3058.53	2897.75	3141.14	3120.49	3214.96	3401.88	2698.54	2578.06	2592.54				42.4	8.2101	7.8282	5.21406	8.33503	9.42623	-2.6294	-64.7627	-13.8332	2.83846	3.39435
	42.6	3071.09	3057.11	2896.67	3139.38	3118.58	3215.54	3414.61	2701.53	2577.64	2592.02				42.6	9.26433	6.75171	6.07944	8.86719	8.92	-3.17339	-62.2286	-15.8963	1.57865	3.64064
	42.8	3069.22	3055.87	2895.34	3137.61	3117.05	3216.24	3426.83	2704.96	2577.34	2591.05				42.8	8.40911	4.71976	6.40356	8.9568	6.33179	-4.02651	-60.9174	-18.9526	2.09649	4.47044
	43	3067.77	3055.21	2894.15	3135.82	3116.04	3217.16	3439	2709.19	2576.84	2590.26				43	6.89719	2.68623	6.08322	8.65738	4.05653	-4.96273	-60.0099	-23.4282	1.78551	4.59693
	43.2	3066.42	3054.66	2892.91	3134.2	3115.42	3218.24	3450.79	2714.31	2576.64	2589.24				43.2	6.33493	3.2707	5.72685	7.50817	1.93999	-5.90755	-58.0882	-27.2558	1.12375	4.18335
	43.4	3065.24	3053.89	2891.88	3132.85	3115.27	3219.57	3462.32	2720.08	2576.33	2588.59				43.4	5.54276	3.82975	4.92435	5.82512	-0.579727	-7.83581	-57.8885	-30.7867	1.5254	3.69369
	43.6	3064.2	3053.17	2890.96	3131.85	3115.55	3221.35	3473.96	2726.65	2576.03	2587.73				43.6	4.54014	3.38266	3.66009	4.6231	-1.28465	-9.36587	-58.0224	-34.9489	2.05205	3.95842
	43.8	3063.34	3052.43	2890.36	3131	3115.73	3223.29	3485.4	2734.04	2575.58	2587.05				43.8	5.10084	5.04364	3.52613	3.37415	-1.26243	-10.3064	-55.5988	-38.8263	1.21315	3.40203
	44	3062.11	3051.12	2889.54	3130.47	3116.01	3225.49	3496.16	2742.12	2575.51	2586.4				44	6.4713	7.43069	3.62903	2.51137	-0.267265	-11.498	-52.7575	-41.4318	0.950964	2.29026
	44.2	3060.81	3049.57	2888.96	3129.9	3115.91	3227.91	3506.48	2750.68	2575.13	2586.11				44.2	6.53193	7.51826	2.67375	3.36895	-0.764523	-13.1573	-49.95	-45.3805	2.01943	1.65834
	44.4	3059.46	3048.16	2888.46	3129.13	3116.37	3230.73	3516.02	2760.34	2574.74	2585.7				44.4	7.54683	6.87374	2.00302	4.02561	-2.18843	-14.2675	-44.7076	-50.445	2.26236	1.83236
	44.6	3057.81	3046.79	2888.14	3128.36	3116.75	3233.66	3524.38	2770.85	2574.26	2585.4				44.6	8.28859	7.10543	1.84708	3.31372	-2.46574	-16.0973	-39.9459	-55.2687	2.03158	1.39954
	44.8	3056.26	3045.37	2887.74	3127.78	3117.41	3237.22	3532.02	2782.44	2573.93	2585.13				44.8	7.05021	6.28873	1.14623	3.15702	-3.84699	-18.8645	-35.9139	-59.8827	1.87141	1.14045
	45	3055.04	3044.32	2887.67	3127.11	3118.32	3241.18	3538.65	2794.83	2573.52	2584.89				45	5.01633	4.60776	0.514098	2.9625	-6.00556	-21.1	-29.7178	-64.9949	1.57503	1.93806
	45.2	3054.2	3043.49	2887.49	3126.67	3119.7	3245.67	3544.01	2808.44	2573.31	2584.33				45.2	4.274	3.60617	0.928793	1.19217	-5.95662	-23.537	-25.6288	-70.1352	0.918381	3.13695
	45.4	3053.39	3042.84	2887.34	3126.59	3120.68	3250.65	3548.98	2822.88	2573.09	2583.67				45.4	2.26496	3.34954	0.494575	0.262327	-5.52373	-27.1263	-23.1461	-75.2351	1.31911	3.58227
	45.6	3053.31	3042.17	2887.31	3126.54	3121.99	3256.48	3553.14	2838.54	2572.73	2582.93				45.6	-0.345518	2.79103	-0.278173	0.104057	-6.91608	-29.6633	-17.7161	-80.3029	2.61066	3.42768
	45.8	3053.39	3041.78	2887.39	3126.65	3123.38	3262.56	3556.11	2855.07	2572.05	2582.28				45.8	-0.267942	1.15588	0.198351	-2.13136	-6.61781	-32.8221	-13.2793	-86.5942	3.92599	3.70475
	46	3053.35	3041.68	2887.21	3127.41	3124.71	3269.72	3558.56	2873.24	2571.23	2581.47				46	0.895349	-0.0409844	1.16612	-4.60691	-7.79161	-38.1312	-11.2709	-94.1728	3.94583	3.6051
	46.2	3053.08	3041.73	2887.01	3128.45	3126.58	3277.79	3560.47	2892.69	2570.52	2580.89				46.2	0.966617	0.148821	0.309823	-5.94472	-10.5183	-42.8404	-6.04415	-100.568	3.33065	2.66157
	46.4	3053	3041.71	2887.06	3129.83	3128.92	3286.83	3560.97	2913.44	2569.95	2580.39				46.4	0.460796	-1.32627	0.0996811	-8.33436	-12.8892	-46.7955	-0.809045	-106.585	1.93731	2.00955
	46.6	3052.87	3042.31	2886.98	3131.77	3131.78	3296.61	3560.92	2935.31	2569.76	2580.06				46.6	0.591682	-3.76953	-0.254666	-10.5558	-15.8443	-52.98	1.75316	-112.503	0.152902	1.64932
	46.8	3052.83	3043.11	2887.24	3133.95	3135.36	3307.95	3560.2	2958.38	2569.86	2579.71				46.8	-0.45676	-3.9931	-1.9693	-10.8175	-20.8763	-57.7929	6.10534	-117.231	-1.35311	1.66752
	47	3053.15	3043.91	2887.8	3136.08	3140.05	3319.6	3558.53	2982.17	2570.22	2579.38				47	-3.3466	-4.46194	-4.29048	-11.0157	-24.1889	-60.3117	9.52296	-121.533	-1.31165	2.03509
	47.2	3054.15	3044.96	2888.88	3138.39	3144.98	3332.08	3556.52	3006.99	2570.35	2578.93				47.2	-5.78162	-6.37762	-5.16509	-11.7061	-26.5917	-63.2622	10.2988	-126.155	-0.626554	1.78116
	47.4	3055.38	3046.38	2889.82	3140.78	3150.69	3344.91	3554.33	3032.54	2570.49	2578.71				47.4	-6.60335	-6.39325	-5.29854	-12.5506	-29.404	-66.1993	13.1067	-129.051	-0.367813	0.581506
	47.6	3056.77	3047.51	2891.05	3143.45	3156.71	3358.58	3551.27	3058.55	2570.54	2578.65				47.6	-7.02119	-6.35381	-6.55166	-13.9645	-31.6183	-69.3587	16.1159	-131.139	-0.851832	0.477974
	47.8	3058.23	3049	2892.43	3146.48	3163.31	3372.69	3547.98	3084.93	2570.85	2578.54				47.8	-8.58058	-7.93235	-7.53113	-17.5957	-33.0919	-73.1081	16.858	-132.386	-1.55281	-0.00572919
	48	3060.11	3050.69	2894.02	3150.49	3169.98	3387.88	3544.45	3111.39	2571.13	2578.72				48	-8.38755	-9.307	-7.7296	-20.9996	-35.3361	-77.8493	19.3588	-131.875	-1.76478	-1.9471
	48.2	3061.58	3052.76	2895.56	3154.85	3177.51	3403.9	3540.21	3137.54	2571.55	2579.26				48.2	-7.96205	-11.3297	-8.48156	-23.6606	-38.7027	-83.8944	22.5404	-129.04	-2.0413	-2.7584
	48.4	3063.42	3055.26	2897.48	3159.98	3185.54	3421.43	3535.58	3162.91	2571.93	2579.73				48.4	-9.81643	-14.1214	-10.5816	-26.8802	-43.2808	-89.9528	22.6591	-124.84	-1.90051	-1.77197
	48.6	3065.54	3058.37	2899.75	3165.63	3194.84	3439.75	3531.14	3187.34	2572.27	2580.01				48.6	-12.1201	-16.0575	-11.5765	-30.8031	-48.0821	-93.306	23.2186	-118.698	-1.07164	-1.70473
	48.8	3068.22	3061.66	2902.16	3172.22	3204.76	3458.78	3526.25	3210.19	2572.33	2580.47				48.8	-13.3053	-17.5947	-13.5348	-32.9573	-52.6731	-97.5589	24.9288	-109.403	0.412545	-2.69249
	49	3070.93	3065.46	2905.19	3178.86	3215.93	3478.75	3521.23	3230.9	2572.19	2581.05				49	-15.8567	-20.3056	-16.0287	-35.9388	-57.586	-101.538	25.4375	-96.783	0.21399	-2.6199
	49.2	3074.59	3069.78	2908.55	3186.7	3227.79	3499.26	3516.09	3248.85	2572.27	2581.54				49.2	-19.0352	-22.8447	-18.0976	-40.8266	-62.3758	-102.926	25.5929	-83.9262	-0.3288	-3.07735
	49.4	3078.45	3074.61	2912.41	3195.17	3240.87	3519.91	3510.95	3264.37	2572.3	2582.33				49.4	-20.1614	-25.445	-19.6624	-45.0576	-67.016	-104.35	26.7116	-69.4195	-0.403989	-4.56708
	49.6	3082.71	3080.04	2916.46	3204.74	3254.61	3541.06	3505.47	3276.51	2572.41	2583.34				49.6	-22.5525	-29.406	-22.0248	-49.5777	-71.6358	-107.165	26.3965	-52.7777	-0.298818	-5.33104
	49.8	3087.51	3086.46	2921.24	3215.06	3269.59	3562.68	3500.4	3285.6	2572.41	2584.45				49.8	-25.5369	-34.9391	-24.5862	-55.199	-77.4808	-108.018	26.0242	-38.6308	-0.139177	-5.80447
	50	3092.93	3094	2926.34	3226.87	3285.62	3584.25	3494.99	3292.04	2572.46	2585.7				50	-28.3482	-40.0051	-27.9191	-61.7491	-83.5904	-108.659	27.1401	-25.6693	0.386844	-7.11038
	50.2	3098.91	3102.43	2932.46	3239.77	3303.02	3606.2	3489.55	3295.88	2572.29	2587.28				50.2	-32.1884	-44.404	-32.0581	-68.2346	-89.8342	-110.636	27.9882	-12.0372	0.146608	-8.04217
	50.4	3105.88	3111.75	2939.21	3254.16	3321.48	3628.44	3483.84	3297.1	2572.42	2588.93				50.4	-37.3796	-48.7405	-37.0097	-74.7251	-94.693	-111.455	27.9611	-2.75229	-0.385416	-9.20823
	50.6	3113.82	3121.91	2947.23	3269.6	3340.87	3650.68	3478.35	3297.19	2572.49	2591.04				50.6	-41.5293	-52.9945	-41.5739	-79.9453	-99.3298	-110.468	28.4003	2.80378	-1.69102	-11.8189
	50.8	3122.49	3132.91	2955.74	3286.17	3361.14	3672.6	3472.47	3295.95	2573.13	2593.64				50.8	-45.7544	-56.3836	-44.2415	-85.862	-102.739	-109.318	29.1906	9.94753	-3.59466	-13.9167
	51	3132.13	3144.48	2964.94	3303.96	3381.93	3694.3	3466.78	3293.36	2573.87	2596.56				51	-50.3045	-59.7969	-47.316	-92.1454	-105.523	-106.318	27.9082	14.4399	-4.32544	-15.2434
	51.2	3142.59	3156.95	2974.64	3322.99	3403.35	3714.99	3461.34	3290.34	2574.84	2599.75				51.2	-54.4251	-65.2457	-49.9424	-97.4696	-108.251	-100.976	26.0689	15.7773	-4.84912	-16.9998
	51.4	3153.92	3170.72	2984.89	3343.04	3425.27	3734.67	3456.25	3286.99	2575.8	2603.35				51.4	-58.7668	-73.243	-52.0211	-104.255	-111.755	-95.6743	26.1414	18.7676	-5.37839	-18.5158
	51.6	3166.15	3186.27	2995.48	3364.87	3448.07	3753.24	3450.86	3282.85	2576.93	2607.15				51.6	-64.1852	-81.4135	-54.6125	-114.515	-115.457	-90.0857	26.6514	21.7295	-4.84361	-19.9058
	51.8	3179.58	3203.24	3006.81	3388.81	3471.46	3770.68	3445.72	3278.48	2577.73	2611.3				51.8	-69.3536	-88.5065	-58.6748	-124.02	-119.232	-84.0083	24.4422	21.1829	-4.04844	-20.9966
	52	3193.89	3221.7	3018.93	3414.35	3495.75	3786.87	3441.03	3274.42	2578.59	2615.58				52	-74.3701	-96.3764	-62.0913	-130.986	-122.892	-78.7717	23.3418	20.107	-4.16941	-22.5474
	52.2	3209.34	3241.73	3031.7	3441.18	3520.55	3802.13	3436.24	3270.37	2579.34	2620.38				52.2	-79.593	-103.303	-66.5739	-137.929	-125.533	-72.4324	25.056	20.5781	-3.07244	-25.1896
	52.4	3225.73	3262.91	3045.6	3469.47	3545.9	3815.76	3431.06	3266.24	2579.83	2625.65				52.4	-84.8957	-108.19	-71.7287	-144.26	-127.393	-64.5757	25.4652	19.9161	-2.17428	-27.7033
	52.6	3243.28	3285.03	3060.35	3498.72	3571.4	3827.95	3426.1	3262.43	2580.26	2631.44				52.6	-89.6417	-113.444	-75.8654	-147.378	-127.53	-56.9688	24.7635	18.683	-2.28257	-29.5173
	52.8	3261.65	3308.4	3075.96	3528.41	3596.8	3838.48	3421.01	3258.66	2580.77	2637.54				52.8	-95.6015	-120.854	-80.3097	-150.582	-125.785	-48.0894	26.9878	19.44	-2.7628	-33.1042
	53	3281.56	3333.37	3092.5	3559.05	3621.65	3847.14	3415.32	3254.59	2581.36	2644.66				53	-102.376	-128.043	-85.4381	-155.801	-123.242	-38.2723	29.0503	21.4316	-3.02427	-36.3895
	53.2	3302.55	3359.58	3110.07	3590.73	3646.02	3853.88	3409.58	3250.17	2581.97	2652.01				53.2	-108.229	-134.806	-89.4261	-161.084	-119.616	-30.167	27.4045	21.633	-3.31996	-37.8937
	53.4	3324.8	3387.22	3128.18	3623.37	3669.41	3859.26	3404.36	3245.96	2582.66	2659.87				53.4	-113.144	-140.547	-91.6726	-164.066	-114.4	-22.9461	25.9263	21.5357	-2.98737	-40.5892
	53.6	3347.75	3415.73	3146.79	3656.34	3691.75	3863.05	3399.11	3241.55	2583.16	2668.24				53.6	-117.165	-145.054	-95.3331	-167.192	-108.805	-15.3154	26.616	21.9219	-2.35769	-43.0378
	53.8	3371.64	3445.25	3166.3	3690.16	3712.92	3865.44	3393.77	3237.27	2583.65	2677.04				53.8	-121.053	-149.999	-98.7394	-169.201	-103.518	-8.83196	25.8894	20.7649	-2.74889	-44.5983
	54	3396.13	3475.65	3186.21	3723.81	3733.04	3866.55	3388.76	3233.28	2584.25	2686.12				54	-124.237	-153.538	-100.65	-167.286	-96.0607	-1.69928	24.8896	18.6991	-2.90287	-47.0084
	54.2	3421.27	3506.54	3206.53	3757.02	3751.28	3866.11	3383.7	3229.71	2584.8	2695.88				54.2	-126.306	-154.925	-102.192	-164.699	-87.6472	5.67029	26.3302	18.1896	-2.72659	-50.1569
	54.4	3446.58	3537.61	3227.05	3789.71	3768.08	3864.3	3378.24	3225.95	2585.39	2706.13				54.4	-127.267	-156.562	-103.474	-163.05	-79.1541	12.9459	27.4739	18.6781	-3.72997	-52.3294
	54.6	3472.14	3569.09	3247.79	3822.11	3782.92	3861.02	3372.8	3222.24	2586.27	2716.76				54.6	-128.161	-157.326	-102.638	-159.124	-70.2832	18.5118	26.8134	18.9655	-4.56648	-53.7443
	54.8	3497.66	3600.28	3267.98	3853.23	3796.16	3856.92	3367.54	3218.31	2587.07	2727.54				54.8	-125.86	-153.209	-99.8186	-153.098	-60.6361	23.8565	26.034	20.3578	-2.38732	-53.6668
	55	3522.31	3630.33	3287.63	3883.29	3807.2	3851.5	3362.41	3214.1	2587.24	2738.2				55	-120.622	-148.652	-95.7258	-146.647	-51.5049	29.079	25.0116	21.6537	-0.569321	-53.3889
	55.2	3545.91	3659.79	3306.23	3911.71	3816.77	3845.36	3357.58	3209.7	2587.45	2748.86				55.2	-115.962	-145.567	-90.7217	-137.17	-42.6516	33.1054	23.0482	21.94	-1.83133	-52.5932
	55.4	3568.67	3688.41	3324	3937.94	3824.19	3838.33	3353.15	3205.35	2587.92	2759.16				55.4	-110.973	-139.852	-87.4498	-124.086	-32.6162	35.788	21.8429	21.908	-1.61113	-50.0847
	55.6	3590.16	3715.55	3341.17	3961.21	3829.75	3831.01	3348.77	3200.97	2588.08	2768.98				55.6	-103.367	-131.091	-83.4281	-109.248	-21.6742	39.4783	21.7422	21.3421	-0.888607	-49.3259
	55.8	3609.96	3740.81	3357.28	3981.5	3832.8	3822.62	3344.41	3196.83	2588.43	2778.93				55.8	-95.1747	-122.352	-77.8875	-92.2663	-9.64614	41.8506	22.241	20.396	-3.31769	-49.5767
	56	3628.17	3764.39	3372.31	3998.06	3833.63	3814.48	3339.87	3192.77	2589.41	2788.69				56	-86.4707	-112.177	-72.5281	-74.4652	1.98814	40.2922	22.6836	20.3801	-5.91715	-47.376
	56.2	3644.34	3785.45	3386.16	4011.28	3832.06	3806.52	3335.29	3188.7	2590.6	2797.85				56.2	-74.1074	-97.9961	-65.1492	-56.5223	12.9988	38.8803	24.0648	19.8844	-4.45013	-44.7051
	56.4	3657.67	3803.48	3398.12	4020.69	3828.58	3798.9	3330.22	3184.81	2591.21	2806.61				56.4	-59.3534	-82.1623	-53.4316	-38.8507	21.5856	38.2782	25.9718	19.3994	-3.74469	-43.2127
	56.6	3668.07	3818.33	3407.44	4026.88	3823.59	3791.25	3324.98	3180.86	2592.18	2815.06				56.6	-44.7221	-67.0048	-40.3623	-22.2363	27.6323	36.7599	26.2768	20.4841	-4.92982	-40.2425
	56.8	3675.55	3830.19	3414.29	4029.66	3817.69	3784.17	3319.76	3176.66	2593.06	2822.65				56.8	-29.8542	-50.3989	-27.9386	-6.7258	31.0557	35.461	25.6443	20.4564	-3.48632	-36.2471
	57	3680.06	3838.36	3418.64	4029.72	3811.24	3776.98	3314.67	3172.66	2593.54	2829.6				57	-15.7808	-31.0772	-15.6921	6.54752	33.5638	35.7862	26.3643	20.7467	-1.38566	-33.1983
	57.2	3682	3842.75	3420.67	4027.23	3804.31	3769.81	3309.26	3168.31	2593.78	2835.91				57.2	-4.17386	-14.1143	-5.08627	16.848	35.1649	36.7919	26.3033	22.1269	-2.62761	-29.748
	57.4	3681.82	3844.19	3420.8	4023.11	3797.15	3762.24	3304.23	3163.89	2594.62	2841.45				57.4	6.29782	-0.449155	3.61469	25.3186	37.2472	37.9803	24.5504	21.8655	-4.18419	-25.5796
	57.6	3679.56	3843.03	3419.35	4017.21	3789.37	3754.62	3299.35	3159.61	2595.35	2846.13				57.6	15.7905	12.1905	10.3442	32.529	40.3565	39.0152	24.3627	20.7095	-3.50337	-21.1956
	57.8	3675.66	3839.55	3416.81	4010.34	3781.07	3746.58	3294.37	3155.53	2596.06	2849.93				57.8	22.6017	21.0675	14.605	35.3415	42.3818	41.1761	26.2324	21.358	-3.92647	-16.8794
	58	3670.65	3834.86	3413.55	4003.15	3772.48	3738.14	3288.88	3151.12	2596.95	2852.88				58	27.4888	25.6366	18.5305	37.1077	43.2174	43.6405	27.4867	20.7957	-5.08289	-12.5312
	58.2	3664.73	3829.37	3409.45	3995.49	3763.81	3729.25	3283.41	3147.22	2598	2854.98				58.2	31.8237	29.6992	21.7802	39.643	43.7923	43.7817	28.0637	20.0635	-4.2026	-8.72364
	58.4	3658.11	3823.08	3404.97	3987.46	3755.03	3720.68	3277.62	3143	2598.61	2856.45				58.4	32.8491	32.3002	22.7417	39.094	43.3111	43.0838	29.4181	21.1934	-3.05535	-6.25469
	58.6	3651.74	3816.57	3400.42	3979.96	3746.57	3711.99	3271.63	3138.75	2599.28	2857.56				58.6	31.3042	32.6886	22.4844	36.5095	41.1714	43.3085	31.1271	22.0088	-3.06705	-4.92833
	58.8	3645.56	3810	3395.9	3972.75	3738.52	3703.47	3265.28	3134.21	2599.89	2858.45				58.8	30.5972	33.5424	23.958	36.3682	39.9807	41.3269	30.858	22.5556	-3.86606	-3.82538
	59	3639.48	3803.18	3390.86	3965.43	3730.51	3695.46	3259.36	3129.73	2600.83	2859.13				59	30.5057	33.9436	25.1315	35.8409	40.1195	39.3033	29.1938	23.0442	-4.55711	-3.36924
	59.2	3633.41	3796.49	3385.97	3958.46	3722.47	3687.63	3253.53	3125.04	2601.69	2859.83				59.2	29.271	33.0161	23.8053	34.1892	40.2747	39.6094	29.258	22.7352	-4.93082	-3.71876
	59.4	3627.71	3789.95	3381.31	3951.67	3714.46	3679.63	3247.7	3120.65	2602.8	2860.54				59.4	29.2275	32.6308	23.2735	34.1793	39.1837	39.4261	28.6065	22.3638	-5.36854	-2.70015
	59.6	3621.65	3783.4	3376.65	3944.79	3706.79	3671.92	3242.16	3116.11	2603.83	2860.85				59.6	30.3964	32.8505	23.0249	34.1733	38.2479	37.9664	26.3808	21.8396	-5.66894	-0.379714
	59.8	3615.6	3776.81	3372.16	3938.04	3699.11	3664.39	3237.08	3112.01	2605.02	2860.73				59.8	30.3713	33.1296	21.4504	33.3146	38.3216	37.6834	25.4506	19.4126	-5.09148	0.98368
	60	3609.51	3770.17	3368.05	3931.42	3691.52	3656.86	3231.91	3108.32	2605.87	2860.46				60	30.37	33.0843	20.2434	33.4538	37.1706	37.1117	25.9274	17.6389	-4.49057	2.2829
	60.2	3603.43	3763.6	3363.93	3924.66	3684.22	3649.58	3226.76	3104.86	2606.89	2859.84				60.2	30.968	32.3758	21.5928	33.306	36.3241	35.7058	25.1339	17.5296	-5.37344	3.5381
	60.4	3597.16	3757.16	3359.38	3918.03	3676.87	3642.49	3221.82	3101.29	2608.03	2859.16				60.4	30.6826	33.0299	23.1451	34.1995	37.7384	35.9926	24.9771	17.3027	-6.24284	2.66259
	60.6	3591.15	3750.41	3354.66	3910.9	3669.11	3635.13	3216.75	3097.88	2609.43	2858.79				60.6	30.394	33.4586	24.9128	36.739	39.3517	37.2343	25.2936	18.0974	-7.78861	1.59822
	60.8	3584.92	3743.9	3349.44	3903.42	3661.23	3627.63	3211.74	3093.96	2611.17	2858.45				60.8	31.9359	31.0946	26.486	37.5493	38.8468	37.6081	24.8956	20.7193	-9.78342	1.82674
	61	3578.42	3737.89	3344.19	3895.93	3653.59	3620.07	3206.8	3089.61	2613.31	2858.04				61	32.443	30.3559	25.7205	37.425	38.5082	38.3544	24.3111	22.9118	-11.2539	2.03667
	61.2	3571.98	3731.63	3339.17	3888.41	3645.88	3612.28	3201.99	3084.89	2615.63	2857.58				61.2	32.0749	32.3329	24.7745	38.2812	37.381	39.4555	24.2908	23.4032	-12.0825	3.29254
	61.4	3565.55	3725.07	3334.23	3880.67	3638.7	3604.39	3197.06	3080.3	2618.13	2856.67				61.4	32.781	31.6635	24.892	38.0242	34.813	38.8044	24.7416	23.2633	-12.7389	5.71632
	61.6	3558.94	3718.97	3329.22	3873.22	3631.89	3596.83	3192.11	3075.59	2620.69	2855.38				61.6	32.2459	30.8345	24.5927	37.2836	33.5443	36.8688	24.9133	23.0373	-12.542	6.43648
	61.8	3552.74	3712.6	3324.35	3865.67	3625.18	3589.56	3187.14	3071.09	2623.16	2854.19				61.8	30.079	33.0447	24.9405	38.4619	34.0802	36.5574	24.0951	22.6938	-12.5208	5.54109
	62	3546.86	3705.83	3319.15	3857.84	3618.23	3582.17	3182.47	3066.5	2625.75	2853.15				62	29.0941	33.5294	27.2136	39.4561	34.7257	36.7996	23.2982	22.6133	-13.5268	5.18543
	62.2	3541.08	3699.29	3313.54	3849.9	3611.26	3574.86	3177.82	3062.02	2628.62	2852.1				62.2	28.2999	32.0571	28.0855	40.1101	35.9468	36.5274	22.6026	22.9439	-15.4479	5.05863
	62.4	3535.53	3692.95	3308.07	3841.79	3603.82	3567.52	3173.46	3057.31	2631.94	2851.14				62.4	27.3	32.0019	26.19	40.9693	37.9029	36.9677	21.2277	23.6663	-17.3501	4.51799
	62.6	3530.05	3686.44	3303.06	3833.52	3596.2	3560.03	3169.27	3052.62	2635.57	2850.26				62.6	28.4217	32.6259	24.7666	41.6166	37.918	38.1871	20.9457	23.0584	-19.3208	4.48979
	62.8	3524.14	3679.88	3298.14	3825.12	3588.73	3552.27	3165	3048.15	2639.67	2849.29				62.8	29.8258	33.4723	23.6169	42.5956	36.6164	38.8944	22.0476	21.3123	-21.5064	5.58267
	63	3518.17	3673.05	3293.61	3816.47	3581.5	3544.53	3160.42	3044.14	2644.13	2848.1				63	30.1188	34.2284	22.1309	43.9209	36.5371	38.6853	23.6555	18.8577	-23.0405	5.399
	63.2	3512.07	3666.18	3289.19	3807.61	3574.12	3536.86	3155.54	3040.56	2648.86	2847.2				63.2	31.1076	35.1237	22.6019	44.1178	36.3236	37.3899	25.2553	17.4099	-23.9056	3.78057
	63.4	3505.74	3659	3284.5	3798.86	3567.02	3529.59	3150.33	3037.11	2653.76	2846.52				63.4	31.9184	36.4378	24.4097	43.7546	35.1159	35.7392	26.6352	17.0376	-26.0802	3.4218
	63.6	3499.36	3651.7	3279.5	3790.15	3560.02	3522.52	3144.96	3033.69	2659.31	2845.76				63.6	31.6415	35.9851	24.5753	42.8527	35.1294	35.1602	26.5927	17.293	-28.4795	4.57502
	63.8	3493.14	3644.68	3274.72	3781.8	3552.95	3515.56	3139.72	3030.1	2665.14	2844.73				63.8	30.5054	34.0411	23.9763	40.4837	35.638	33.831	26.4468	18.9137	-30.5793	4.73671
	64	3487.18	3638.01	3269.9	3773.95	3545.86	3508.98	3134.46	3026.05	2671.58	2843.84				64	29.1093	33.8543	23.7802	38.2537	34.146	32.4674	24.9097	22.0392	-33.4306	5.26937
	64.2	3481.47	3631.15	3265.25	3766.41	3539.3	3502.48	3129.84	3021.39	2678.52	2842.55				64.2	28.3452	33.2828	22.4518	37.7008	32.5046	33.0006	21.7313	23.3196	-36.3753	7.33158
	64.4	3475.85	3624.72	3260.87	3758.83	3532.78	3495.79	3125.69	3016.85	2686.07	2840.98				64.4	27.1534	32.0827	22.075	37.6707	32.4289	33.3622	20.1144	22.1666	-38.0258	7.96299
	64.6	3470.59	3618.24	3256.33	3751.34	3526.35	3489.21	3121.71	3012.47	2693.78	2839.46				64.6	26.0964	32.5452	23.3878	37.5712	31.8949	31.9674	19.873	22.3803	-40.7683	6.71516
	64.8	3465.33	3611.72	3251.52	3743.79	3520.08	3482.91	3117.69	3007.95	2702.4	2838.25				64.8	26.5943	32.5466	24.4044	37.82	30.2423	32.4466	20.196	21.747	-43.9581	6.45933
	65	3459.91	3605.23	3246.61	3736.2	3514.21	3476.21	3113.55	3003.85	2711.34	2836.84				65	27.9083	32.3614	24.7027	38.4191	29.393	33.1724	22.0425	19.5801	-46.5002	6.92715
	65.2	3454.2	3598.76	3241.66	3728.48	3508.29	3469.68	3108.85	3000.03	2721.06	2835.54				65.2	28.3082	32.5803	24.8993	37.9158	29.0631	32.9593	24.5352	19.2732	-50.1022	5.98945
	65.4	3448.57	3592.22	3236.7	3721.08	3502.59	3462.96	3103.84	2996.1	2731.41	2834.38				65.4	29.1614	32.0614	24.1995	36.6577	28.5323	34.3002	24.9882	19.6853	-54.3592	6.37682
	65.6	3442.56	3585.88	3232	3713.82	3496.87	3455.96	3098.91	2992.2	2742.71	2832.93				65.6	29.5737	32.4161	23.1363	35.471	28.0454	35.7982	24.8149	18.8133	-56.8646	7.93064
	65.8	3436.78	3579.15	3227.45	3706.88	3491.3	3448.78	3094.02	2988.5	2754.11	2831.24				65.8	29.2466	35.2028	22.0218	34.4873	28.9482	34.4234	22.6696	19.378	-58.5704	8.59584
	66	3430.85	3571.95	3223.14	3700.06	3485.29	3442.22	3089.9	2984.43	2766.17	2829.47				66	29.3939	34.7203	21.9232	32.7127	29.6503	32.8213	19.4367	20.4126	-61.3052	9.76073
	66.2	3425.07	3565.29	3218.68	3693.79	3479.48	3435.64	3086.14	2980.4	2778.53	2827.32				66.2	28.5215	33.7749	21.8285	31.0148	29.7152	31.7679	18.2924	20.0308	-62.3118	11.5969
	66.4	3419.43	3558.35	3214.45	3687.57	3473.45	3429.59	3082.49	2976.37	2791	2824.93				66.4	27.9799	34.9431	20.7426	30.7851	28.9763	29.0661	18.7045	20.6514	-61.676	11.4465
	66.6	3413.84	3551.4	3210.29	3681.43	3467.88	3423.96	3078.66	2972.16	2803.19	2822.78				66.6	28.1844	34.3038	21.3578	31.1691	28.4373	27.3753	18.6713	20.978	-61.1288	10.5341
	66.8	3408.16	3544.72	3205.83	3675.09	3462.02	3418.54	3074.92	2968.06	2815.42	2820.64				66.8	28.1485	31.8544	23.5157	31.7188	28.9472	27.1982	20.6623	19.7894	-60.1722	11.3234
	67	3402.56	3538.56	3200.98	3668.74	3456.31	3413	3070.36	2964.24	2827.14	2818.32				67	28.2016	31.6447	23.5508	32.2875	29.2096	28.4951	23.4277	18.8472	-56.7947	10.5533
	67.2	3396.81	3532.02	3196.43	3662.19	3450.35	3407.16	3065.72	2960.5	2838.15	2816.46				67.2	29.6606	32.0716	23.3381	32.8033	29.1468	29.2751	22.6653	18.3484	-53.8221	8.9674
	67.4	3390.71	3525.82	3191.61	3655.7	3444.58	3401.3	3061.35	2956.88	2848.73	2814.61				67.4	30.9242	30.6197	24.0725	31.788	30.6072	29.7792	21.1864	18.2155	-52.2214	9.86953
	67.6	3384.5	3519.77	3186.9	3649.48	3438.14	3395.24	3057.21	2953.2	2858.97	2812.48				67.6	31.0411	29.4581	22.8598	30.7931	31.6007	30.6437	20.7501	18.3845	-49.2396	11.3353
	67.8	3378.34	3514.02	3182.53	3643.4	3432.08	3389.07	3053.13	2949.55	2868.42	2810.17				67.8	30.4948	28.5	20.712	29.6544	29.5884	31.3431	18.687	17.8657	-46.1876	10.8002
	68	3372.39	3508.34	3178.58	3637.65	3426.22	3382.83	3049.76	2946.01	2877.47	2808.13				68	28.4018	28.0954	19.2365	27.8702	29.5338	29.466	15.978	18.0042	-43.8782	10.8941
	68.2	3366.96	3502.75	3174.76	3632.18	3420.24	3377.27	3046.55	2942.31	2885.86	2805.74				68.2	26.9852	28.1068	18.9017	27.3252	30.1904	28.0088	16.9785	19.023	-39.6009	12.5693
	68.4	3361.57	3497.04	3170.95	3626.63	3414.26	3371.52	3042.92	2938.49	2893.25	2803.17				68.4	25.7904	28.9757	19.7969	28.2627	28.3433	28.7327	18.4088	18.2459	-34.1677	12.6824
	68.6	3356.58	3491.12	3166.82	3620.86	3408.84	3365.82	3039.22	2935.02	2899.62	2800.7				68.6	25.4303	30.4449	21.0213	29.2225	27.775	28.1991	18.9237	17.2135	-30.8138	12.2882
	68.8	3351.29	3484.88	3162.55	3614.92	3403.08	3360.24	3035.29	2931.51	2905.55	2798.23				68.8	27.0422	31.8367	21.8041	30.5038	28.7385	27.7282	20.9711	18.2447	-26.7676	12.6591
	69	3345.73	3478.47	3158.06	3608.59	3397.46	3354.66	3030.85	2927.74	2910.26	2795.66				69	29.3671	31.8357	23.4475	33.1833	27.1791	28.6516	22.7103	18.7257	-21.2465	12.6108
	69.2	3339.65	3472.2	3153.26	3601.71	3392.18	3348.78	3026.32	2924.04	2914.12	2793.25				69.2	29.6278	30.9322	23.5897	34.472	26.1885	29.4522	22.2197	18.677	-17.2232	11.2533
	69.4	3333.92	3466.11	3148.71	3594.85	3386.86	3342.95	3022.01	2920.22	2917.2	2791.18				69.4	29.1364	29.9436	22.2708	35.0019	27.7099	28.8464	21.0794	19.7481	-14.0328	9.58428
	69.6	3327.97	3460.25	3144.34	3587.71	3381.14	3337.27	3017.87	2916.13	2919.69	2789.38				69.6	29.4136	28.4064	21.2235	35.793	27.8767	28.0236	20.5152	21.1147	-9.84693	8.63433
	69.8	3322.21	3454.74	3140.16	3580.55	3375.69	3331.76	3013.82	2911.83	2921.14	2787.67				69.8	28.6867	26.7965	21.2542	36.2931	28.2745	26.8896	19.5061	21.4484	-5.5238	8.53687
	70	3316.5	3449.39	3135.8	3573.22	3369.74	3326.49	3010.07	2907.62	2922.02	2785.9				70	27.8889	27.8392	21.828	36.3079	30.6058	26.2178	18.4579	20.6376	-3.4144	9.4419
	70.2	3311.01	3443.53	3131.43	3566.04	3363.52	3321.28	3006.4	2903.64	2922.57	2783.85				70.2	27.7536	30.1853	22.2187	36.2528	31.7754	25.469	18.1204	18.608	-2.35554	10.9732
	70.4	3305.36	3437.38	3126.9	3558.73	3357.19	3316.33	3002.76	2900.15	2922.92	2781.47				70.4	28.329	30.8843	22.9255	36.0337	29.9722	23.9891	18.8004	17.1603	-0.391281	13.3639
	70.6	3299.73	3431.15	3122.29	3551.7	3351.52	3311.62	2998.9	2896.75	2922.72	2778.56				70.6	27.8312	32.2249	23.3652	34.4518	28.4615	23.5911	19.0201	16.1489	1.85317	14.6185
	70.8	3294.24	3424.49	3117.65	3544.98	3345.74	3306.82	2995.21	2893.67	2922.27	2775.71				70.8	27.0749	33.8236	22.1207	32.3358	28.3133	24.7429	18.0755	15.2977	2.14125	14.3476
	71	3288.85	3417.76	3113.48	3538.72	3340.21	3301.79	2991.61	2890.58	2921.86	2772.86				71	27.3238	32.8892	19.9972	31.0584	27.7588	24.4181	18.4327	15.2874	2.54943	13.7999
	71.2	3283.25	3411.41	3109.55	3532.51	3334.59	3297.07	2987.8	2887.52	2921.17	2770.24				71.2	28.8042	30.6962	19.878	30.5153	27.8173	23.6363	19.4136	15.971	4.72194	12.3879
	71.4	3277.38	3405.38	3105.49	3526.46	3328.97	3292.27	2983.9	2884.21	2920	2767.92				71.4	29.1171	30.6256	20.3203	30.6535	29.8872	24.4583	19.0559	16.3731	6.24415	10.5174
	71.6	3271.63	3399.15	3101.44	3520.16	3322.59	3287.35	2980.15	2881.05	2918.75	2765.97				71.6	28.9034	30.2936	20.1607	32.2879	32.9316	24.0128	19.4432	15.4245	6.16233	9.86524
	71.8	3265.81	3393.25	3097.4	3513.48	3315.92	3282.74	2976.12	2878.09	2917.51	2763.89				71.8	29.1989	30.2399	20.6776	35.1558	33.5942	21.9737	19.9776	13.5513	6.67055	10.8318
	72	3260.02	3387.05	3093.16	3506.14	3309.25	3278.48	2972.26	2875.53	2916.07	2761.65				72	28.3062	30.3274	21.6023	37.1286	32.4686	21.7558	18.5385	13.5087	7.46345	11.2869
	72.2	3254.55	3381.14	3088.84	3498.67	3302.93	3274.02	2968.71	2872.64	2914.57	2759.36				72.2	26.0402	29.8142	20.7886	38.475	31.5985	21.8756	17.1354	14.4219	7.42325	11.9932
	72.4	3249.54	3375.12	3084.87	3490.82	3296.62	3269.78	2965.36	2869.85	2913.13	2756.81				72.4	24.9503	29.4979	19.388	38.6861	30.922	20.682	16.7049	13.377	6.92823	13.4661
	72.6	3244.5	3369.35	3081	3483.28	3290.65	3265.62	2962.08	2867.22	2911.74	2753.99				72.6	25.174	29.0689	19.6573	37.5635	28.259	22.0004	15.0144	13.761	7.58135	14.6623
	72.8	3239.47	3363.52	3076.97	3475.83	3285.23	3260.97	2959.26	2864.29	2910.05	2751.05				72.8	25.3156	28.0302	20.5471	35.9135	27.2752	23.3698	15.1832	15.5226	9.03281	13.8631
	73	3234.35	3358.09	3072.81	3468.91	3279.65	3256.37	2955.88	2861.15	2908.14	2748.48				73	25.9998	27.7829	20.6626	34.2864	28.01	22.6489	17.7807	14.2202	10.1648	12.564
	73.2	3229.08	3352.32	3068.66	3462.05	3274.07	3251.87	2952.22	2858.59	2906.04	2745.98				73.2	26.3758	29.2096	21.7562	33.9466	27.6164	22.8977	18.6256	13.06	10.3031	12.3947
	73.4	3223.81	3346.44	3064.14	3455.33	3268.62	3247.15	2948.46	2855.78	2904.04	2743.55				73.4	26.5672	29.7954	22.5031	33.3153	27.0311	24.6486	19.0757	14.923	10.2849	11.5735
	73.6	3218.49	3340.43	3059.77	3448.68	3263.21	3242.11	2944.59	2852.66	2901.96	2741.38				73.6	26.2144	30.1123	21.2039	33.6433	27.6477	24.1605	19.8064	15.6618	9.73623	10.0777
	73.8	3213.39	3334.43	3055.65	3441.87	3257.63	3237.44	2940.61	2849.56	2900.21	2739.46				73.8	24.6837	29.8002	20.3429	33.9354	26.8058	24.5227	19.0744	15.426	8.08376	9.66942
	74	3208.62	3328.51	3051.63	3435.14	3252.51	3232.22	2937	2846.44	2898.73	2737.46				74	23.121	29.531	19.5209	33.5634	25.523	26.3476	17.6542	16.561	6.30356	10.3754
	74.2	3204.07	3322.64	3047.86	3428.47	3247.37	3226.94	2933.49	2843.01	2897.61	2735.38				74.2	22.9385	29.0143	18.0865	32.6934	25.3254	27.4363	17.6051	16.2967	5.80811	9.60025
	74.4	3199.46	3316.95	3044.34	3422.01	3242.4	3221.29	2930.01	2840.01	2896.35	2733.62				74.4	22.2508	27.69	17.646	33.0328	24.6906	27.9146	16.2164	14.3801	6.26586	8.88717
	74.6	3195.18	3311.56	3040.75	3415.3	3237.51	3215.8	2926.96	2837.2	2895.1	2731.78				74.6	21.2863	26.2475	18.3829	32.4417	23.6141	27.9542	15.6877	13.9309	6.65313	9.0724
	74.8	3190.87	3306.36	3037.06	3409.03	3232.9	3210.15	2923.65	2834.41	2893.68	2729.98				74.8	21.8401	26.4816	17.5911	31.8807	23.5651	27.2617	16.8058	13.7395	7.17587	9.20408
	75	3186.43	3300.94	3033.69	3402.52	3228.03	3204.92	2920.3	2831.67	2892.22	2728.07				75	22.4274	27.3769	17.2024	31.9728	24.5891	26.2545	16.7164	13.9914	7.93758	9.69898
	75.2	3181.91	3295.47	3030.14	3396.3	3223.1	3199.66	2917.03	2828.76	2890.5	2726.04				75.2	22.7597	26.8624	17.5482	30.7863	24.7591	25.2337	15.2166	15.3166	8.77747	11.2811
	75.4	3177.3	3290.15	3026.69	3390.17	3218.13	3194.86	2914.08	2825.57	2888.74	2723.56				75.4	23.8678	27.1333	17.382	30.342	24.7219	23.313	16.2949	16.0327	9.0544	12.7838
	75.6	3172.42	3284.56	3023.16	3384.12	3213.16	3190.25	2910.46	2822.39	2886.88	2720.97				75.6	23.7758	28.6371	17.6973	30.8785	25.8484	22.9451	18.3582	15.9825	9.2638	13.5214
	75.8	3167.85	3278.78	3019.59	3377.85	3207.83	3185.65	2906.87	2819.17	2885	2718.15				75.8	22.5425	28.726	18.4705	30.5842	26.3426	22.9519	17.7609	16.2723	10.1421	14.5721
	76	3163.35	3273.19	3015.77	3371.86	3202.72	3181.05	2903.37	2815.92	2882.81	2715.22				76	22.4858	26.4193	19.3782	30.6802	24.7818	23.4575	16.9069	15.7103	11.5435	14.2606
	76.2	3158.84	3268.13	3011.91	3365.49	3197.89	3176.28	2900	2812.9	2880.46	2712.51				76.2	22.7732	25.8312	18.911	32.7029	23.9159	23.5647	18.3621	14.9986	11.176	12.9057
	76.4	3154.31	3262.79	3008.23	3358.87	3193.11	3171.61	2896.1	2809.9	2878.34	2710.08				76.4	21.3741	26.5268	18.1855	32.6983	23.9174	23.8952	18.4329	14.865	10.9604	11.2582
	76.6	3150.16	3257.6	3004.68	3352.48	3188.36	3166.71	2892.79	2806.98	2876.05	2708				76.6	22.523	25.3005	16.6022	31.2604	23.0623	24.5975	15.2722	14.0731	11.4686	9.77018
	76.8	3145.25	3252.64	3001.58	3346.29	3183.86	3161.78	2889.88	2804.25	2873.82	2706.14				76.8	24.8203	24.7124	15.3298	31.6432	22.6651	25.2507	14.4548	13.574	10.6647	8.54824
	77	3140.39	3247.62	2998.5	3339.86	3179.21	3156.67	2886.91	2801.52	2871.83	2704.5				77	24.0906	26.1168	14.726	31.5633	23.8811	24.7369	15.6167	13.7158	9.05887	8.75889
	77.2	3135.67	3242.23	2995.63	3333.8	3174.33	3151.88	2883.75	2798.82	2870.12	2702.6				77.2	22.4471	26.7385	15.1872	28.7204	24.6467	24.4234	14.2044	12.5352	8.97943	9.59296
	77.4	3131.34	3237.03	2992.41	3328.27	3169.42	3146.88	2881.17	2796.46	2868.24	2700.64				77.4	22.4491	25.1451	15.7894	27.9291	24.1582	24.6727	13.7898	12.2836	8.60781	10.7527
	77.6	3126.75	3232.11	2989.3	3322.55	3164.7	3142.09	2878.09	2793.87	2866.69	2698.29				77.6	21.11	25.0607	16.4254	28.5765	23.2138	23.317	16.3767	12.9401	7.8911	12.1698
	77.8	3122.91	3226.97	2985.82	3316.95	3160.12	3137.55	2874.74	2791.36	2865.01	2695.83				77.8	19.3427	25.6406	17.6196	26.7613	22.6927	22.078	16.2682	11.9528	8.68189	12.6069
	78	3118.9	3221.89	2982.32	3311.8	3155.62	3133.21	2871.62	2789.02	2863.19	2693.32				78	19.7992	25.4352	17.508	25.816	21.9513	21.8215	15.4658	12.2857	9.91732	11.6281
	78.2	3114.98	3216.81	2978.84	3306.5	3151.3	3128.82	2868.46	2786.37	2861.08	2691.19				78.2	20.1313	24.841	17.3106	27.3778	21.7705	21.1965	16.8138	14.1109	10.344	10.6382
	78.4	3110.85	3211.9	2975.44	3300.91	3146.84	3124.67	2864.98	2783.48	2859.09	2689.04				78.4	20.3351	25.4662	16.3269	27.3944	22.8793	21.6244	16.4886	13.7723	10.1023	10.2284
	78.6	3106.83	3206.67	2972.32	3295.53	3142.13	3120.12	2861.94	2780.87	2857.08	2687.08				78.6	20.9495	25.1418	15.0665	27.7172	24.3643	23.1045	14.5415	13.4061	9.23421	9.9334
	78.8	3102.47	3201.9	2969.4	3289.76	3137.15	3115.48	2859.03	2778.04	2855.43	2685.03				78.8	21.6781	23.5374	14.0938	29.5453	24.6778	23.3242	15.372	14.8398	7.68021	10.2587
	79	3098.2	3197.16	2966.65	3283.81	3132.27	3110.79	2855.79	2775.1	2853.97	2682.97				79	21.58	23.8433	13.624	29.3941	24.9052	23.7296	16.0407	12.8886	6.99019	10.7353
	79.2	3093.84	3192.31	2963.89	3278.06	3127.21	3106.01	2852.68	2772.91	2852.59	2680.75				79.2	21.4804	25.1358	13.9876	28.3196	24.9793	24.0467	15.175	10.458	7.00659	10.9682
	79.4	3089.63	3187.16	2960.96	3272.44	3122.36	3101.31	2849.67	2770.76	2851.11	2678.59				79.4	21.0651	25.3379	16.0122	28.1526	23.4375	21.665	15.3994	11.2811	7.80117	11.0601
	79.6	3085.44	3182.17	2957.48	3266.82	3117.82	3097.31	2846.48	2768.42	2849.41	2676.35				79.6	20.2383	25.735	18.2076	27.516	22.1262	20.1256	16.4912	11.3104	9.5957	10.7793
	79.8	3081.54	3176.84	2953.77	3261.45	3113.42	3093.17	2843.11	2766.25	2847.28	2674.31				79.8	19.259	26.9166	18.7357	26.4114	22.627	20.338	16.9057	10.8371	11.3475	9.8723
	80	3077.69	3171.51	2950.01	3256.18	3108.78	3089.19	2839.78	2763.98	2844.97	2672.35				80	19.2596	26.0838	19.1321	26.8635	22.8963	19.8732	16.1662	12.5619	11.3524	9.89633
	80.2	3073.82	3166.48	2946.18	3250.7	3104.29	3085.17	2836.63	2761.22	2842.77	2670.34				80.2	19.3928	23.8588	18.3789	27.401	22.4674	20.3853	15.9587	14.3277	10.9126	10.1626
	80.4	3069.97	3161.92	2942.67	3245.27	3099.74	3081	2833.39	2758.35	2840.59	2668.33				80.4	18.6996	22.4594	17.4984	26.9407	23.1065	21.7563	15.7985	14.1751	10.851	9.51847
	80.6	3066.29	3157.43	2939.18	3239.96	3095.05	3076.54	2830.34	2755.56	2838.48	2666.52				80.6	19.061	22.3962	16.716	25.7423	23.7715	21.6564	15.1392	14.008	9.83716	9.06699
	80.8	3062.32	3152.99	2936.01	3234.92	3090.3	3072.38	2827.37	2752.77	2836.67	2664.68				80.8	19.8257	21.7364	15.2296	25.662	23.2923	20.8861	13.806	13.2939	8.658	9.19549
	81	3058.43	3148.75	2933.02	3229.67	3085.79	3068.21	2824.77	2750.23	2834.99	2662.87				81	19.1904	20.5969	15.0058	25.9532	21.9093	19.6785	13.2607	12.9213	8.00203	8.76281
	81.2	3054.64	3144.69	2929.96	3224.57	3081.55	3064.49	2821.98	2747.62	2833.45	2661.15				81.2	18.6323	20.7014	15.7431	25.5876	20.1889	18.7548	14.3362	12.3228	7.57553	8.83094
	81.4	3050.9	3140.44	2926.81	3219.43	3077.64	3060.63	2819.03	2745.33	2831.96	2659.31				81.4	19.6978	21.4298	14.48	25.4434	19.8341	19.3127	15.313	11.0529	7.03487	9.35898
	81.6	3046.81	3136.21	2924.15	3214.37	3073.6	3056.78	2815.88	2743.09	2830.63	2657.43				81.6	19.755	20.0658	13.5515	25.806	19.8295	19.4675	15.6292	11.7402	6.59834	9.28845
	81.8	3043.08	3132.36	2921.26	3209.17	3069.81	3052.87	2812.77	2740.6	2829.29	2655.58				81.8	18.2674	19.8269	15.2779	24.9929	17.6309	18.9728	16.1518	13.1627	6.76921	9.43198
	82	3039.49	3128.15	2918.09	3204.39	3066.46	3049.14	2809.43	2737.93	2827.88	2653.62				82	17.1887	21.9731	15.8928	23.7605	17.1366	19.6154	16.7118	12.5116	7.72247	10.4465
	82.2	3036.14	3123.61	2914.96	3199.61	3062.82	3045.04	2806.19	2735.59	2826.21	2651.47				82.2	17.3501	23.1447	15.3816	23.7735	19.368	20.0236	15.313	11.9103	8.5693	10.2071
	82.4	3032.55	3118.93	2911.86	3194.93	3058.83	3041.2	2803.3	2733.1	2824.52	2649.56				82.4	17.4378	23.6339	16.4743	22.7842	18.9847	18.9964	14.2162	12.905	7.95188	9.41859
	82.6	3029.2	3114.11	2908.39	3190.48	3055.26	3037.43	2800.43	2730.52	2822.98	2647.64				82.6	16.5342	25.3817	17.3566	22.0249	17.9584	18.2533	14.3683	11.9844	8.34621	9.98893
	82.8	3025.83	3108.87	2905.02	3186.06	3051.51	3033.86	2797.53	2728.34	2821.18	2645.63				82.8	17.746	25.4566	16.3204	22.5085	19.956	18.3324	14.6865	10.3411	8.81499	9.26833
	83	3022.04	3104.05	2901.9	3181.5	3047.33	3030.1	2794.54	2726.28	2819.54	2643.97				83	20.1798	23.1849	14.6975	22.2683	20.7438	18.3171	15.345	10.7732	7.70365	7.68013
	83.2	3017.87	3099.57	2899.11	3177.13	3043.32	3026.55	2791.43	2723.99	2818.13	2642.46				83.2	20.331	21.8596	13.7663	22.038	19.2046	17.9197	15.3417	11.8298	5.98418	8.1093
	83.4	3013.99	3095.31	2896.38	3172.56	3039.56	3022.93	2788.45	2721.58	2817.04	2640.68				83.4	18.9382	20.2091	12.9042	24.5972	19.8027	17.6417	14.4839	12.1738	6.55274	9.32789
	83.6	3010.21	3091.45	2893.93	3167.36	3035.42	3019.47	2785.63	2719.09	2815.55	2638.79				83.6	19.5771	18.9913	12.0747	25.7631	19.9422	17.735	13.9122	13.1704	6.12994	9.15195
	83.8	3006.24	3087.64	2891.46	3162.34	3031.65	3015.82	2782.88	2716.31	2814.66	2637				83.8	18.5704	19.3511	12.9519	25.2042	18.4627	17.9446	13.398	14.2485	4.12843	9.69497
	84	3002.86	3083.72	2888.71	3157.25	3027.96	3012.28	2780.24	2713.47	2813.8	2634.92				84	15.9731	19.3209	14.5441	25.5482	18.6791	18.4046	13.2264	13.7907	4.26306	10.1367
	84.2	2999.75	3079.92	2885.67	3152.2	3024.17	3008.48	2777.52	2710.81	2812.9	2633.04				84.2	15.5674	18.8524	15.3689	24.4933	19.1614	18.4411	14.4014	13.2858	5.34514	8.73383
	84.4	2996.57	3076.13	2882.58	3147.54	3020.35	3004.9	2774.48	2708.16	2811.7	2631.45				84.4	16.3829	19.5719	15.9581	21.665	18.3952	18.5678	15.6008	12.7936	5.32231	7.00204
	84.6	2993.23	3072.15	2879.3	3143.4	3016.75	3001.02	2771.33	2705.74	2810.72	2630.2				84.6	16.1776	19.017	16.7117	21.4941	18.8114	19.3218	15.7291	11.2807	6.22098	5.94185
	84.8	2990.07	3068.53	2876	3138.88	3012.77	2997.19	2768.2	2703.63	2809.15	2629.03				84.8	16.5238	18.163	15.4761	22.482	20.3132	19.832	15.7206	10.0879	8.61448	5.62122
	85	2986.57	3064.77	2873.16	3134.48	3008.7	2993.16	2765.07	2701.6	2807.37	2627.92				85	18.0044	19.6499	13.3823	21.5529	20.2126	19.0066	15.3759	10.9327	9.01501	5.7828
	85.2	2982.95	3060.69	2870.6	3130.15	3004.67	2989.62	2762.05	2699.28	2805.57	2626.65				85.2	17.8231	20.7056	12.4624	22.7649	20.584	17.5092	14.9921	11.0028	9.05386	7.12693
	85.4	2979.48	3056.55	2868.17	3125.34	3000.48	2986.08	2759.02	2697.22	2803.78	2625.04				85.4	17.0278	20.6563	11.3201	24.7083	20.8081	17.6173	15.5256	10.598	8.61685	8.91025
	85.6	2976.1	3052.4	2866.04	3120.39	2996.42	2982.58	2755.83	2694.98	2802.15	2623.1				85.6	17.0599	21.2345	10.5678	24.2521	19.6154	17.4975	16.1889	11.4119	7.71461	10.4435
	85.8	2972.65	3048.08	2863.86	3115.67	2992.64	2979.12	2752.61	2692.66	2800.69	2620.88				85.8	17.1437	21.4064	11.4014	23.2941	18.4181	16.4888	15.6185	11.9851	6.90885	11.7729
	86	2969.28	3043.92	2861.42	3111	2989.06	2975.93	2749.63	2690.22	2799.34	2618.47				86	16.256	20.1083	13.0859	24.0526	17.2473	16.4834	14.3487	11.8967	7.11367	11.7311
	86.2	2966.09	3040.04	2858.63	3106.15	2985.78	2972.45	2746.83	2687.88	2797.86	2616.29				86.2	16.6544	18.8532	14.5482	22.8592	15.2273	18.184	14.0444	12.3978	6.82086	9.76161
	86.4	2962.59	3036.34	2855.62	3101.9	2982.9	2968.74	2744.05	2685.25	2796.58	2614.55				86.4	17.781	18.1936	16.0938	20.7953	14.4093	17.977	12.8986	13.1476	7.21187	8.42396
	86.6	2959.08	3032.7	2852.3	3097.74	2979.95	2965.3	2741.71	2682.67	2794.98	2612.89				86.6	16.6513	18.5973	15.6098	20.5499	14.7893	17.0977	10.9167	12.8877	7.53564	7.71844
	86.8	2955.92	3028.9	2849.41	3093.66	2977	2961.86	2739.59	2680.11	2793.61	2611.5				86.8	15.7827	18.8058	14.5735	20.4288	14.6275	17.2746	10.7173	12.6124	6.89942	5.90454
	87	2952.68	3025.16	2846.43	3089.57	2974.04	2958.41	2737.39	2677.66	2792.22	2610.46				87	16.8724	19.2904	14.5179	20.2557	15.552	16.9999	11.109	11.7079	6.13466	5.34793
	87.2	2949.21	3021.13	2843.66	3085.52	2970.72	2955.09	2735.23	2675.46	2791.12	2609.27				87.2	16.9561	20.8317	13.274	20.7983	17.6432	15.9739	9.80577	10.1431	6.26273	6.72427
	87.4	2945.92	3016.86	2841.14	3081.2	2967.02	2951.97	2733.42	2673.61	2789.71	2607.84				87.4	16.2774	21.8227	11.4548	22.2254	18.7654	15.9306	9.46539	8.38895	6.57213	6.48622
	87.6	2942.59	3012.51	2838.97	3076.67	2963.22	2948.67	2731.35	2672.03	2788.5	2606.7				87.6	17.8133	20.8429	11.601	22.9163	19.8445	16.8511	10.7209	8.17989	6.51671	5.64037
	87.8	2938.81	3008.51	2836.44	3072.07	2959.12	2945.22	2729.14	2670.33	2787.08	2605.51				87.8	19.0978	20.4463	12.7914	23.0544	20.3393	17.83	11.6316	7.91527	6.82995	6.3108
	88	2935.03	3004.31	2833.89	3067.46	2955.16	2941.55	2726.7	2668.88	2785.76	2604.16				88	18.8951	20.4189	13.0441	22.9824	19.4405	18.4974	12.5877	7.19126	7.28586	7.27166
	88.2	2931.25	3000.37	2831.19	3062.87	2951.34	2937.83	2724.11	2667.37	2784.15	2602.64				88.2	18.7753	19.6468	13.9818	23.0638	18.8382	18.9808	13.4168	8.17237	8.04026	7.45693
	88.4	2927.5	2996.44	2828.26	3058.26	2947.62	2933.94	2721.35	2665.57	2782.58	2601.16				88.4	19.1074	19.1324	15.7713	22.6996	18.3565	19.8697	14.0604	9.76751	8.1489	7.98765
	88.6	2923.61	2992.67	2824.91	3053.81	2943.99	2929.93	2718.5	2663.52	2780.92	2599.41				88.6	19.5784	19.5317	17.1393	21.9156	17.7905	19.8361	14.5885	10.0753	7.78525	9.22027
	88.8	2919.72	2988.58	2821.49	3049.4	2940.39	2926.01	2715.56	2661.51	2779.45	2597.51				88.8	19.0486	20.6088	16.7827	22.8909	19.4727	19.7085	14.0463	11.0779	7.82573	9.72407
	89	2916.01	2984.42	2818.21	3044.6	2936.2	2921.99	2712.86	2659.06	2777.8	2595.58				89	17.991	21.7355	16.3794	24.6939	21.1288	20.6868	13.7981	12.8296	7.67542	9.18175
	89.2	2912.47	2979.91	2814.95	3039.59	2932.04	2917.75	2709.95	2656.46	2776.43	2593.84				89.2	18.1308	22.525	15.9545	25.1672	20.7177	21.4758	15.5719	12.9474	6.53258	8.72869
	89.4	2908.78	2975.44	2811.87	3034.58	2927.89	2913.5	2706.73	2653.92	2775.17	2592.07				89.4	17.7789	22.8733	14.7052	25.0095	20.9485	20.3632	15.3013	12.1932	5.79643	8.75469
	89.6	2905.38	2970.78	2809.06	3029.57	2923.67	2909.64	2703.89	2651.52	2774.05	2590.36				89.6	16.7828	22.9923	13.6	25.3217	21.0882	18.9179	13.7921	12.7615	6.11205	8.36746
	89.8	2901.98	2966.31	2806.39	3024.51	2919.55	2905.94	2701.1	2648.78	2772.73	2588.74				89.8	17.508	21.7884	13.3732	24.5018	19.2533	17.4139	14.7149	14.014	6.20807	7.51959
	90	2898.36	2962.1	2803.75	3019.87	2915.93	2902.7	2698.02	2645.97	2771.6	2587.32				90	18.4795	20.0358	12.0832	21.7655	18.259	15.3052	15.3657	14.1544	5.61351	7.26461
	90.2	2894.66	2958.25	2801.51	3015.74	2912.19	2899.75	2695.06	2643.15	2770.49	2585.83				90.2	18.1133	19.1245	11.6027	20.5079	18.4445	14.4364	13.7932	13.7117	5.1772	7.0699
	90.4	2891.12	2954.39	2799.05	3011.59	2908.57	2896.86	2692.42	2640.46	2769.55	2584.48				90.4	17.8611	19.1932	12.3748	20.6918	18.2588	14.6202	13.9863	14.0266	4.38795	7.1101
	90.6	2887.53	2950.56	2796.59	3007.49	2904.89	2893.87	2689.42	2637.63	2768.74	2582.99				90.6	17.2267	19.4148	12.263	20.1159	17.9767	15.2956	15.1856	12.8448	3.4177	6.95294
	90.8	2884.25	2946.65	2794.07	3003.56	2901.36	2890.72	2686.45	2635.42	2768.15	2581.71				90.8	16.1606	19.1761	13.5396	19.0638	18.0746	16.1841	14.1851	9.7952	3.00589	6.50151
	91	2881.04	2942.88	2791.12	2999.8	2897.66	2887.4	2683.76	2633.63	2767.46	2580.39				91	15.7406	19.1943	16.0212	19.2032	18.0766	17.0581	13.0761	8.25672	4.03397	6.10318
	91.2	2877.92	2938.97	2787.78	2995.85	2894.13	2883.93	2681.22	2632.03	2766.51	2579.24				91.2	15.8169	19.3208	16.1022	19.7512	18.01	17.2857	12.194	8.26677	5.35724	6.3156
	91.4	2874.67	2935.2	2784.71	2991.9	2890.48	2880.5	2678.93	2630.34	2765.3	2577.88				91.4	16.6516	18.49	15.8986	20.3435	17.4127	17.3596	10.2258	7.76398	6.974	6.18081
	91.6	2871.26	2931.56	2781.42	2987.73	2887.15	2876.97	2677.08	2628.91	2763.78	2576.81				91.6	17.4691	17.7365	16.0519	20.4722	17.1383	17.9738	9.2482	7.44468	7.63998	5.18126
	91.8	2867.72	2928.02	2778.44	2983.71	2883.58	2873.35	2675.19	2627.28	2762.33	2575.76				91.8	17.3443	18.6864	12.9582	20.6044	17.7523	17.7969	9.12242	8.77231	6.86374	5.22326
	92	2864.31	2924.08	2776.17	2979.43	2880.07	2869.89	2673.46	2625.39	2761.05	2574.71				92	17.6028	19.5868	11.3022	22.2446	17.8461	16.9183	8.12022	10.0491	5.94342	5.46293
	92.2	2860.66	2920.22	2773.78	2974.89	2876.45	2866.57	2671.86	2623.29	2759.97	2573.6				92.2	18.4661	19.6475	12.3254	22.3384	17.752	16.1737	8.67834	10.7428	4.70383	5.16386
	92.4	2856.99	2916.19	2771.27	2970.59	2872.95	2863.37	2669.91	2621.09	2759.14	2572.64				92.4	17.9758	20.5474	12.309	20.4037	18.1243	16.4702	10.844	11.6761	3.84839	4.73804
	92.6	2853.49	2912.02	2768.81	2966.61	2869.24	2859.99	2667.62	2618.6	2758.34	2571.63				92.6	17.0609	21.3124	13.2729	20.8382	17.92	16.5013	10.9078	13.0171	4.65777	5.68672
	92.8	2850.1	2907.76	2765.92	2962.17	2865.87	2856.74	2665.56	2615.97	2757.24	2570.34				92.8	17.4609	20.1695	15.3458	22.9039	15.9613	16.9698	10.7708	12.846	6.04473	7.15005
	93	2846.54	2903.96	2762.84	2957.55	2862.78	2853.17	2663.27	2613.57	2755.96	2568.78				93	17.3279	19.0331	14.1374	22.6936	15.5439	18.0811	11.4413	10.9451	6.45448	8.45784
	93.2	2843.25	2900.13	2760.31	2953.07	2859.59	2849.57	2661.03	2611.61	2754.67	2567				93.2	15.6526	18.3437	12.1651	23.1246	16.1912	17.9063	11.1233	8.75405	6.92527	8.84485
	93.4	2840.23	2896.63	2757.88	2948.25	2856.32	2846	2658.83	2610	2753.23	2565.27				93.4	14.968	17.4476	12.1809	24.6491	16.2076	17.9906	10.7516	7.72184	6.8242	9.02147
	93.6	2837.2	2893.12	2755.44	2943.29	2853.05	2842.38	2656.71	2608.49	2752.01	2563.44				93.6	15.5846	16.8662	11.8475	24.5796	17.227	18.1398	10.7891	7.00466	5.42251	8.55049
	93.8	2834.04	2889.79	2753.11	2938.52	2849.38	2838.79	2654.51	2607.15	2751.05	2561.89				93.8	15.0664	18.0804	11.8416	22.7003	19.468	17.3065	10.8871	7.04229	4.3463	7.19447
	94	2831.19	2885.9	2750.61	2934.2	2845.39	2835.42	2652.33	2605.59	2750.22	2560.55				94	14.1684	19.1496	13.7429	21.1164	19.1354	17.3064	11.4785	8.69842	4.20759	6.03446
	94.2	2828.3	2882.19	2747.68	2930.02	2841.76	2831.86	2649.94	2603.67	2749.37	2559.42				94.2	14.6084	19.1749	14.2359	20.5411	18.5495	17.6166	11.6501	10.567	3.66291	5.82154
	94.4	2825.26	2878.34	2745.01	2925.97	2837.97	2828.45	2647.69	2601.5	2748.71	2558.16				94.4	16.7286	17.072	12.9395	20.0923	18.1456	16.2249	11.3705	9.65084	3.87586	6.72754
	94.6	2821.67	2875.36	2742.48	2921.98	2834.56	2825.33	2645.35	2599.8	2747.79	2556.75				94.6	16.8748	15.8417	12.6599	19.6109	16.4687	15.9218	11.8299	9.57072	4.55859	7.01676
	94.8	2818.33	2872.2	2740	2918.08	2831.41	2822.1	2642.96	2597.82	2746.85	2555.28				94.8	22.7362	11.0838	12.0613	21.8067	15.436	16.2345	13.3095	6.8042	6.54957	9.71722
	95	2813.37	2871.14	2737.98	2913.93	2828.78	2819.32	2640.46	2597.23	2745.41	2553.21				95	13.0718	1.80577	4.87163	10.4752	6.35146	6.78344	6.30581	0.909	3.79856	5.39957

## Sheet: rep3
	Melt Curves	2019-04-30						2019-05-15		2019-05-15					Melt Curve Derivative
	Temperature	5 uM IRE1 wt 2042	5 uM wt + 62.5 uM MPZN	5 uM wt + 125 uM MPZN	5 uM wt + 250 uM MPZN	5 uM wt + 500 uM MPZN	5 uM wt + 1000 uM MPZN	5 uM IRE1 P108A 2410	5 uM IRE1 W125A 2411	5 uM 2045 IRE1 Q105C ox	5 uM 2045 IRE1 Q105C ox +DTT				Temperature	5 uM IRE1 wt 2042	5 uM wt + 62.5 uM MPZN	5 uM wt + 125 uM MPZN	5 uM wt + 250 uM MPZN	5 uM wt + 500 uM MPZN	5 uM wt + 1000 uM MPZN	5 uM IRE1 P108A 2410	5 uM IRE1 W125A 2411	5 uM 2045 IRE1 Q105C ox	5 uM 2045 IRE1 Q105C ox +DTT
	20	3188.3	3102.46	3118.99	3148.92	3215.13	3302.84	3707.76	2995.6	3091.85	3120.25				20	24.2311	25.1699	23.8954	29.6697	26.0146	29.8344	33.149	20.9699	22.9655	21.8768
	20.2	3178.61	3092.4	3109.44	3137.05	3204.73	3290.91	3694.5	2987.21	3082.67	3111.5				20.2	52.5008	54.5349	51.7734	64.2843	56.3649	64.6412	71.8228	45.4348	49.7586	47.3997
	20.4	3168.91	3082.33	3099.88	3125.18	3194.32	3278.97	3681.25	2978.82	3073.48	3102.75				20.4	48.4622	50.3399	47.7909	59.3393	52.0292	59.6688	66.298	41.9398	45.931	43.7535
	20.6	3159.22	3072.26	3090.32	3113.31	3183.91	3267.04	3667.99	2970.44	3064.29	3094				20.6	48.4622	50.3399	47.7909	59.3393	52.0292	59.6688	66.298	41.9398	45.931	43.7535
	20.8	3149.53	3062.19	3080.76	3101.45	3173.51	3255.11	3654.73	2962.05	3055.11	3085.25				20.8	48.4622	50.3399	47.7909	59.3393	52.0292	59.6688	66.298	41.9398	45.931	43.7535
	21	3139.84	3052.13	3071.2	3089.58	3163.1	3243.17	3641.47	2953.66	3045.92	3076.5				21	48.649	50.3973	48.0789	59.5079	52.513	59.8577	66.9197	42.065	46.2274	43.9958
	21.2	3130.15	3042.06	3061.65	3077.71	3152.7	3231.24	3628.21	2945.27	3036.73	3067.75				21.2	47.5115	50.2858	46.0245	58.6658	49.2049	58.8477	63.0663	41.302	44.3141	42.4272
	21.4	3120.9	3032.13	3052.78	3066.25	3143.45	3219.76	3616.44	2937.18	3028.26	3059.58				21.4	44.9904	48.269	44.168	55.4011	45.3556	55.4487	55.4425	39.8847	41.2063	39.7298
	21.6	3112.06	3022.89	3043.82	3055.59	3134.4	3209.03	3605.87	2929.37	3020.17	3051.71				21.6	44.6349	43.5248	45.5451	51.4816	44.7502	52.8588	51.3247	37.537	39.8668	40.0181
	21.8	3103.17	3014.67	3034.6	3045.62	3125.55	3198.57	3595.82	2922.16	3012.32	3043.58				21.8	42.0348	39.7847	45.8976	48.4079	43.8448	51.4136	48.4424	35.4442	38.0547	39.8599
	22	3095.41	3006.86	3025.56	3036.24	3116.9	3188.57	3586.42	2915.15	3004.86	3035.78				22	36.2761	38.5071	44.3808	45.1076	42.2289	47.8703	46.5852	34.2756	37.9221	39.3941
	22.2	3088.58	2999.34	3016.86	3027.61	3108.67	3179.45	3577.14	2908.51	2997.09	3027.77				22.2	32.2519	35.4226	43.0499	40.9067	40.4726	43.8182	45.6999	31.7643	38.7096	40.2359
	22.4	3082.44	2992.67	3008.4	3019.82	3100.71	3170.95	3568.21	2902.44	2989.38	3019.81				22.4	29.5188	32.6644	40.7432	37.9089	38.6586	41.5397	43.4061	29.1977	39.2883	38.7556
	22.6	3076.79	2986.15	3000.65	3012.38	3093.2	3162.84	3559.8	2896.73	2981.4	3012.36				22.6	25.9568	32.3146	36.8199	36.1019	37.0915	38.7725	40.4802	28.6188	39.3966	35.6027
	22.8	3071.94	2979.73	2993.62	3005.35	3085.87	3155.39	3551.93	2890.99	2973.67	3005.52				22.8	24.3601	32.1261	33.949	34.463	35.3754	36.7257	39.2772	27.9478	38.8852	33.4525
	23	3066.83	2973.38	2986.96	2998.53	3079	3148.03	3544.08	2885.59	2965.92	2998.92				23	26.9307	30.2235	32.9244	33.8587	34.3602	36.9059	38.0926	26.3712	37.3019	32.3698
	23.2	3061.19	2967.59	2980.42	2991.76	3072.06	3140.61	3536.71	2880.38	2958.82	2992.54				23.2	28.4823	29.3523	32.2006	34.1959	34.7382	37.2096	36.2805	26.1147	34.452	31.7122
	23.4	3055.5	2961.59	2974.05	2984.92	3065.16	3133.11	3529.43	2875.14	2952.15	2986.17				23.4	28.7963	29.4932	31.9524	33.3268	33.9312	38.0215	37.2808	25.8614	31.4478	32.1273
	23.6	3049.65	2955.85	2967.62	2978.51	3058.52	3125.35	3521.82	2870.09	2946.18	2979.68				23.6	30.0152	28.4841	31.9981	31.0523	32.4551	40.0415	37.9504	24.4	29.5296	32.4707
	23.8	3043.59	2950.22	2961.28	2972.49	3052.14	3117.23	3514.4	2865.34	2940.29	2973.18				23.8	29.5243	27.0245	31.5954	29.0088	31.9981	39.3842	35.6075	23.6792	28.4127	32.9011
	24	3037.99	2945.01	2955.02	2966.87	3045.74	3109.68	3507.55	2860.57	2934.82	2966.53				24	26.1256	26.3299	30.5907	27.706	31.195	37.3538	33.9512	24.0756	26.9468	33.2519
	24.2	3033.1	2939.72	2949.08	2961.43	3039.71	3102.23	3500.78	2855.76	2929.44	2959.93				24.2	23.7979	25.0778	29.0996	25.9061	29.1248	36.9217	33.2544	23.565	26.9664	32.4995
	24.4	3028.39	2935.03	2943.41	2956.49	3034.01	3094.96	3494.31	2851.2	2924.06	2953.51				24.4	23.1362	22.6944	27.163	24.1244	28.9004	35.4769	31.1566	21.9307	26.3769	32.2521
	24.6	3023.86	2930.56	2938.24	2951.63	3028.13	3088.13	3488.31	2846.93	2918.96	2947.02				24.6	21.8257	22.0427	24.671	25.1408	29.1202	32.0083	29.1318	21.4992	24.3231	32.3831
	24.8	3019.59	2926.21	2933.5	2946.41	3022.47	3082.07	3482.57	2842.56	2914.27	2940.58				24.8	21.7133	21.2224	22.7911	26.4094	26.8769	30.4236	29.0004	21.687	23.7101	32.0658
	25	3015.1	2922.09	2929.05	2941.17	3017.35	3075.89	3476.7	2838.27	2909.44	2934.24				25	22.947	19.8485	22.1857	25.7094	25.4715	30.2451	28.7766	21.3928	23.7277	30.7927
	25.2	3010.45	2918.22	2924.57	2936.12	3012.2	3070.03	3471.07	2834	2904.84	2928.29				25.2	23.2343	19.3966	22.4983	25.4293	25.7762	28.4928	28.0299	21.1361	22.2383	29.2213
	25.4	3005.83	2914.3	2920.04	2931.01	3007.09	3064.43	3465.43	2829.8	2900.46	2922.54				25.4	23.2262	19.504	22.7418	25.1523	24.9564	27.9804	28.4122	21.3817	22.5559	28.034
	25.6	3001.2	2910.4	2915.46	2926.17	3002.25	3058.78	3459.65	2825.49	2895.82	2917.07				25.6	22.7105	19.815	23.3027	22.729	23.2322	28.585	29.7458	20.7319	22.6823	26.961
	25.8	2996.8	2906.31	2910.72	2921.91	2997.65	3053.08	3453.55	2821.52	2891.43	2911.78				25.8	21.1193	21.3313	24.2282	20.5031	24.398	27.6738	30.7031	20.0509	21.9165	25.1555
	26	2992.73	2901.86	2905.89	2917.91	2992.5	3047.82	3447.41	2817.5	2886.97	2906.96				26	19.9683	22.8622	22.8758	19.414	25.1618	24.8179	31.0577	18.9653	22.7302	24.0472
	26.2	2988.75	2897.17	2901.66	2914.12	2987.65	3043.11	3441.13	2813.98	2882.31	2902.07				26.2	20.0519	24.1937	19.7182	18.4647	24.4963	23.0074	31.6533	16.8654	24.0038	24.7914
	26.4	2984.72	2892.16	2897.92	2910.44	2982.64	3038.58	3434.83	2810.69	2877.43	2897.08				26.4	19.6354	26.0624	18.4631	18.9619	25.3861	21.6379	30.7008	15.9707	23.9958	24.6847
	26.6	2980.86	2886.81	2894.21	2906.49	2977.52	3034.38	3428.89	2807.54	2872.67	2892.19				26.6	19.905	26.7568	18.3452	20.2434	26.0425	21.3048	29.2731	16.1407	25.2422	24.6008
	26.8	2976.72	2881.58	2890.63	2902.36	2972.32	3029.97	3423.14	2804.29	2867.43	2887.19				26.8	20.8137	25.3145	16.8879	21.1908	24.7358	22.2794	27.5869	14.9335	24.5924	25.4604
	27	2972.57	2876.7	2887.36	2898.03	2967.65	3025.4	3417.86	2801.51	2862.94	2882.04				27	21.0393	23.9093	17.2061	21.8159	22.9146	24.5316	25.772	14.6614	21.8372	25.7567
	27.2	2968.36	2871.99	2883.64	2893.67	2963.1	3020.19	3412.8	2798.33	2858.63	2876.95				27.2	20.3369	23.2772	19.6303	21.9041	22.4045	26.3348	24.431	16.3847	20.7126	24.9282
	27.4	2964.43	2867.46	2879.61	2889.35	2958.7	3014.97	3408.06	2795.05	2854.67	2872.1				27.4	19.8117	21.1501	19.8801	20.5084	21.4674	26.3431	23.4473	16.0719	19.2504	23.6688
	27.6	2960.39	2863.58	2875.71	2885.48	2954.45	3009.71	3403.44	2791.93	2850.95	2867.54				27.6	20.2124	17.7632	19.8421	18.9883	21.5501	25.5469	22.1392	15.5046	17.1968	21.52
	27.8	2956.34	2860.22	2871.62	2881.74	2950.02	3004.79	3399.2	2788.85	2847.68	2863.49				27.8	20.595	17.0925	20.9902	17.8665	22.5013	24.0364	20.8851	15.0525	17.3553	19.3672
	28	2952.16	2856.67	2867.35	2878.33	2945.4	3000.11	3395.02	2785.92	2844	2859.72				28	20.7264	17.8438	21.2992	16.7139	24.5008	22.2613	20.9196	14.3243	18.1423	18.6746
	28.2	2948.07	2853.15	2863.13	2875.03	2940.26	2995.87	3390.88	2783.1	2840.7	2856.07				28.2	20.48	16.8857	21.0625	15.7923	25.8985	20.9076	19.8226	13.7684	13.6368	16.8354
	28.4	2944	2849.88	2858.94	2871.95	2935.17	2991.74	3387.06	2780.37	2838.68	2852.94				28.4	19.8882	16.4461	20.8008	16.1909	24.9475	19.7925	19.3509	14.0434	6.89901	15.6436
	28.6	2940.16	2846.5	2854.88	2868.56	2930.32	2987.98	3383.07	2777.48	2837.91	2849.68				28.6	18.562	17.7123	19.3502	16.4283	23.5251	17.8382	20.1802	14.199	1.36964	17.0737
	28.8	2936.58	2842.86	2851.22	2865.43	2925.73	2984.5	3379	2774.65	2838.21	2846.14				28.8	17.1425	17.5682	17.5739	15.4709	22.8502	17.8538	20.7699	15.0602	-5.72974	17.8648
	29	2933.27	2839.49	2847.85	2862.33	2921.21	2980.76	3374.8	2771.48	2840.17	2842.59				29	15.9454	16.6672	15.654	15.189	21.3681	18.9884	20.1805	15.4083	-13.3795	17.0804
	29.2	2930.06	2836.01	2844.88	2859.22	2917.13	2976.85	3370.79	2768.5	2843	2839.09				29.2	17.0098	18.893	14.7856	17.0837	20.3582	20.438	22.0685	15.3625	-11.25	20.2999
	29.4	2926.27	2831.71	2841.68	2855.36	2912.81	2972.4	3365.85	2765.19	2844.14	2834.27				29.4	21.4733	24.7923	18.3214	20.9261	23.7862	24.8768	26.0402	17.8888	-0.274673	26.8815
	29.6	2921.33	2825.95	2837.36	2850.68	2907.4	2966.66	3360.3	2761.22	2843	2828.32				29.6	27.8113	32.7898	24.797	27.4955	30.4986	33.3918	30.5361	22.2298	10.986	32.7644
	29.8	2914.95	2818.47	2831.67	2844.17	2900.46	2958.94	3353.42	2756.21	2839.52	2821.01				29.8	37.277	42.7644	31.9852	37.4428	39.2749	43.2816	38.7973	27.9397	26.2196	41.5018
	30	2906.29	2808.76	2824.35	2835.67	2891.56	2949.33	3344.68	2749.95	2832.43	2811.67				30	49.1999	54.61	43.3303	47.9698	50.3951	53.523	49.1121	35.3561	43.8234	51.809
	30.2	2895.48	2796.86	2814.38	2825.16	2880.36	2937.59	3333.97	2742.08	2822.47	2800.61				30.2	57.511	62.3827	54.4274	55.6437	60.7769	63.4328	55.9518	42.7408	53.0301	56.3874
	30.4	2883.65	2784.19	2802.99	2813.73	2867.53	2924.26	3322.59	2733.08	2811.77	2789.48				30.4	59.7938	63.8198	58.0599	58.0921	66.6901	68.3453	58.0516	46.2519	53.1819	55.0101
	30.6	2871.86	2771.63	2791.43	2802.24	2854.05	2910.67	3311	2723.84	2801.51	2778.82				30.6	57.9455	61.127	57.6271	55.8484	67.0319	66.4936	56.9422	45.6436	49.3912	51.0637
	30.8	2860.8	2760.03	2780.13	2791.69	2841.11	2897.98	3300.2	2715.04	2792.36	2769.33				30.8	51.0943	54.0645	55.1745	48.923	61.0149	59.9282	49.3116	41.9257	39.8238	42.3734
	31	2851.69	2750.25	2769.76	2782.82	2829.91	2886.9	3291.47	2707.3	2785.77	2762.02				31	39.5582	42.6478	45.6705	39.6249	50.7287	50.2552	38.4678	34.7562	26.9008	30.9924
	31.2	2844.94	2742.92	2762.04	2775.81	2820.9	2877.97	3284.75	2701.37	2781.47	2756.81				31.2	29.0675	32.3185	33.1312	30.9579	39.3836	38.8795	29.1447	23.6246	16.7446	22.3078
	31.4	2839.95	2737.15	2756.32	2770.3	2814.11	2871.2	3279.73	2697.87	2778.9	2752.99				31.4	20.4474	25.0588	24.4334	24.6248	28.8391	30.3683	21.1246	12.4141	9.27987	15.2565
	31.6	2836.64	2732.78	2752.14	2765.88	2809.18	2865.65	3276.17	2696.3	2777.54	2750.62				31.6	13.6194	19.4705	17.3519	19.224	21.1807	24.6556	14.8575	3.04843	4.98111	9.19602
	31.8	2834.35	2729.24	2749.26	2762.47	2805.38	2861.27	3273.56	2696.55	2776.66	2749.1				31.8	9.17612	15.493	12.0044	16.2733	17.8214	19.4689	12.6033	-5.06708	4.78562	6.87721
	32	2832.83	2726.44	2747.17	2759.25	2801.92	2857.72	3271.07	2698.13	2775.52	2747.74				32	6.80852	13.9419	9.48933	15.3107	16.278	16.8644	10.8939	-10.2976	6.0764	6.44263
	32.2	2831.53	2723.61	2745.37	2756.38	2798.79	2854.44	3269.19	2700.35	2774.24	2746.52				32.2	5.96032	13.2044	8.3242	13.2548	15.9892	15.6065	9.10397	-10.0666	6.81881	5.59369
	32.4	2830.38	2721.19	2743.78	2753.95	2795.49	2851.54	3267.32	2701.99	2772.75	2745.43				32.4	6.27954	11.7813	8.07484	11.1335	16.3022	12.585	9.57648	-7.37147	8.70443	6.25432
	32.6	2829.01	2718.88	2742.08	2751.82	2792.34	2849.29	3265.41	2703.26	2770.83	2744				32.6	6.62193	10.5151	8.82544	11.2663	15.2271	11.7579	8.82235	-4.43761	9.37034	7.38835
	32.8	2827.76	2716.89	2740.28	2749.47	2789.45	2846.7	3263.86	2703.68	2769.11	2742.57				32.8	6.16046	11.0772	8.61952	10.6858	13.2679	13.6448	6.83058	0.209214	7.93131	6.42642
	33	2826.52	2714.46	2738.58	2747.62	2787	2843.93	3262.63	2703.26	2767.61	2741.4				33	6.42781	11.2863	9.43726	8.49045	11.8519	13.3595	6.01387	3.27023	7.57964	6.15893
	33.2	2825.23	2712.39	2736.46	2745.97	2784.68	2841.36	3261.44	2702.5	2766.08	2740.08				33.2	5.80346	11.1207	11.301	8.64191	11.0252	12.877	5.39854	4.04263	7.36075	6.42609
	33.4	2824.18	2709.99	2734.17	2744.16	2782.59	2838.67	3260.52	2701.61	2764.8	2738.83				33.4	5.39959	11.4941	11.1234	8.6647	10.0926	14.6949	3.46313	5.87191	4.42172	6.43613
	33.6	2823.01	2707.83	2732.08	2742.55	2780.59	2835.58	3259.99	2700.19	2764.24	2737.46				33.6	6.21405	11.1736	9.71395	7.44888	10.0594	14.5321	2.83225	7.09982	3.06636	7.24809
	33.8	2821.69	2705.57	2730.23	2741.11	2778.5	2832.95	3259.31	2698.89	2763.47	2735.93				33.8	7.13622	9.94444	9.6358	7.6557	11.3905	12.5568	3.50551	5.86007	3.62496	8.2093
	34	2820.21	2703.85	2728.26	2739.43	2776.09	2830.48	3258.52	2697.77	2762.86	2734.28				34	7.03076	8.84032	8.69857	9.05152	11.5687	12.3561	5.31584	6.23257	2.13165	7.20338
	34.2	2818.87	2702	2726.72	2737.51	2773.96	2827.98	3257.22	2696.36	2762.51	2733.03				34.2	7.10879	8.44163	8.14697	9.64942	9.8574	12.6914	6.26646	7.53283	2.75216	6.80626
	34.4	2817.35	2700.45	2724.89	2735.53	2772.05	2825.46	3256.05	2694.89	2761.62	2731.54				34.4	7.54744	8.30284	9.74881	11.1015	10.0864	11.7092	6.5159	6.07487	6.18484	6.79897
	34.6	2815.87	2698.63	2722.84	2733.09	2769.85	2823.27	3254.59	2693.88	2760.11	2730.36				34.6	7.49819	9.08205	10.9392	12.3563	11.7166	11.2725	7.64747	5.72474	7.75576	5.52337
	34.8	2814.31	2696.79	2720.6	2730.67	2767.45	2820.9	3253.06	2692.52	2758.56	2729.25				34.8	8.12114	10.1612	10.4819	12.0313	11.3911	12.0095	7.73004	7.0036	8.55198	5.65011
	35	2812.57	2694.58	2718.63	2728.31	2765.25	2818.52	3251.61	2691.13	2756.65	2728.01				35	9.82617	11.0227	10.7277	11.2559	11.9978	11.6837	5.60416	7.00814	10.6729	7.5021
	35.2	2810.4	2692.44	2716.35	2726.19	2762.56	2816.25	3250.83	2689.73	2754.43	2726.28				35.2	11.2385	10.7646	10.2868	10.1311	14.4846	10.8313	3.42717	6.6558	9.95772	8.80178
	35.4	2808.21	2690.27	2714.58	2724.27	2759.56	2814.15	3250.19	2688.41	2752.71	2724.55				35.4	10.1229	10.708	8.34356	8.78808	15.0015	10.6921	2.29742	7.48312	8.71732	9.01748
	35.6	2806.4	2688.18	2712.94	2722.65	2756.66	2811.96	3249.92	2686.74	2750.91	2722.67				35.6	8.31228	10.2608	7.76602	7.92883	13.8458	10.7412	0.854197	8.23089	8.4069	9.55249
	35.8	2804.82	2686.19	2711.37	2721.07	2754.04	2809.85	3249.84	2685.17	2749.38	2720.78				35.8	7.88715	9.41735	9.08781	7.56504	12.6016	10.7361	-0.32347	7.93553	7.20411	9.12503
	36	2803.28	2684.39	2709.31	2719.62	2751.63	2807.65	3250.02	2683.57	2748.03	2719.07				36	6.54919	9.20957	10.2558	7.23673	11.185	11.0028	-1.35093	7.88091	5.91307	7.85652
	36.2	2802.21	2682.52	2707.34	2718.17	2749.55	2805.44	3250.28	2682.06	2746.95	2717.64				36.2	4.74714	8.5923	9.93121	6.9828	9.7607	11.5317	-0.511431	6.97723	6.00409	6.58787
	36.4	2801.22	2680.98	2705.31	2716.81	2747.65	2803.03	3250.24	2680.8	2745.63	2716.43				36.4	6.20796	7.44213	10.3625	7.03782	9.65416	12.2572	0.157398	5.82748	5.87212	5.1692
	36.6	2799.73	2679.52	2703.2	2715.35	2745.64	2800.58	3250.33	2679.75	2744.61	2715.53				36.6	7.54768	6.7116	10.9132	7.14946	10.4402	12.2515	-1.30546	4.40503	5.39972	4.5515
	36.8	2798.35	2678.27	2701.05	2713.93	2743.45	2798.2	3250.79	2679	2743.43	2714.59				36.8	5.90226	6.45177	9.36405	7.50694	11.5217	10.9475	-3.16936	3.60608	6.1676	4.32026
	37	2797.34	2676.94	2699.49	2712.3	2741.03	2796.16	3251.55	2678.28	2742.29	2713.84				37	5.06744	6.05416	6.96206	8.66106	12.5521	10.5376	-3.77099	3.19811	4.26478	3.26278
	37.2	2796.22	2675.76	2698.13	2710.47	2738.46	2793.98	3252.36	2677.69	2741.87	2713.27				37.2	6.16864	7.30848	7.30058	9.61154	13.2473	10.1373	-5.68283	3.30769	-0.311309	2.42383
	37.4	2794.9	2673.99	2696.55	2708.49	2735.83	2792.18	3253.87	2676.93	2742.37	2712.77				37.4	6.40716	9.00871	7.94312	9.92695	12.2143	8.20444	-8.5751	3.6799	-3.77398	3.65144
	37.6	2793.64	2672.2	2695	2706.51	2733.65	2790.67	3255.71	2676.18	2743.3	2711.83				37.6	7.07027	9.98124	7.45048	10.2474	9.69686	7.00094	-9.78913	4.62773	-5.58584	4.3337
	37.8	2792.04	2670.08	2693.51	2704.42	2731.85	2789.32	3257.73	2675.07	2744.68	2711.07				37.8	8.38087	9.34221	8.02974	10.1249	9.25483	6.95869	-10.0385	5.70842	-9.7898	4.07676
	38	2790.31	2668.47	2691.73	2702.5	2729.88	2787.94	3259.78	2673.91	2746.96	2710.1				38	9.24089	8.83232	9.8656	9.32023	9.9828	5.7329	-11.5039	6.7026	-9.41075	5.89942
	38.2	2788.42	2666.55	2689.68	2700.69	2727.91	2787.01	3262.37	2672.4	2748.16	2708.75				38.2	8.83588	8.45715	9.50994	8.72822	9.42885	4.6982	-13.6957	7.64594	-3.66604	7.01441
	38.4	2786.86	2665.14	2688.02	2699.02	2726.07	2785.95	3265.18	2670.91	2748.53	2707.41				38.4	7.05092	6.78127	7.52668	7.91095	9.62512	5.94605	-14.3178	7.35696	-0.455659	6.03996
	38.6	2785.59	2663.77	2686.6	2697.54	2723.99	2784.7	3268.09	2669.48	2748.44	2706.34				38.6	5.39512	6.34336	7.1982	6.78889	11.2983	5.65857	-14.84	6.75908	0.779828	5.12044
	38.8	2784.65	2662.48	2685.13	2696.27	2721.68	2783.73	3271.23	2668.23	2748.11	2705.3				38.8	4.72365	8.18638	6.9941	6.3175	10.4256	4.48891	-17.5553	5.95242	4.56397	5.50702
	39	2783.7	2660.53	2683.85	2694.99	2719.91	2782.82	3275.11	2667.12	2746.68	2704.19				39	4.07414	9.00045	5.47334	6.20011	8.02906	5.31234	-20.0104	4.65665	7.11643	4.54668
	39.2	2783.03	2658.93	2682.84	2693.78	2718.38	2781.63	3279.16	2666.33	2745.45	2703.47				39.2	3.19475	8.74861	5.76458	6.23171	7.5071	5.47736	-20.9012	3.99279	6.08572	3.83956
	39.4	2782.39	2656.95	2681.44	2692.5	2716.87	2780.71	3283.54	2665.46	2744.2	2702.6				39.4	2.90693	10.5208	8.18097	6.01713	7.48176	3.66154	-23.4453	4.64786	6.35446	4.31231
	39.6	2781.83	2654.81	2679.67	2691.36	2715.41	2780.05	3288.55	2664.53	2742.85	2701.77				39.6	3.23386	10.6274	8.41199	6.07979	6.88662	4.33672	-26.2642	4.0126	7.65229	4.1741
	39.8	2781.07	2652.78	2678.13	2690.08	2714.06	2778.92	3293.96	2663.89	2741.18	2700.94				39.8	3.8153	9.19563	7.73196	5.9475	7.27799	6.18838	-27.2934	2.91002	8.28445	3.8602
	40	2780.3	2651.1	2676.54	2688.98	2712.45	2777.7	3299.48	2663.33	2739.63	2700.19				40	4.29583	8.53607	8.03363	5.73676	8.61543	5.36841	-28.6426	2.57776	7.41413	4.31791
	40.2	2779.32	2649.38	2674.97	2687.76	2710.69	2776.76	3305.47	2662.9	2738.27	2699.22				40.2	5.37628	7.72944	7.23305	5.99496	8.61364	4.86963	-31.1604	1.26711	5.6473	4.52123
	40.4	2778.12	2648.08	2673.7	2686.57	2709.07	2775.68	3311.89	2662.86	2737.36	2698.39				40.4	7.13212	5.5707	5.37091	6.64393	7.56044	6.03839	-32.3673	-0.68	4.05796	4.3956
	40.6	2776.56	2647.13	2672.77	2685.11	2707.67	2774.44	3318.45	2663.13	2736.61	2697.4				40.6	7.07833	4.05243	4.46205	7.20426	6.38433	5.27879	-34.263	-1.65959	3.18498	5.61571
	40.8	2775.35	2646.44	2671.81	2683.73	2706.51	2773.63	3325.63	2663.52	2736.09	2696.16				40.8	5.97024	2.73666	5.51564	7.0811	5.49713	3.19593	-36.9081	-2.56632	1.98632	6.41648
	41	2774.14	2645.99	2670.56	2682.34	2705.49	2773.08	3333.16	2664.22	2735.79	2694.88				41	5.87939	2.0857	6.38729	5.98407	4.19855	2.97568	-38.5892	-4.81452	1.11023	6.22859
	41.2	2773.04	2645.55	2669.29	2681.38	2704.79	2772.47	3341.03	2665.39	2735.55	2693.67				41.2	4.99512	2.42446	6.7301	4.06214	3.46461	2.27456	-39.6022	-5.99367	2.23153	6.17875
	41.4	2772.19	2645.02	2667.92	2680.68	2704.06	2772.25	3349	2666.53	2734.89	2692.45				41.4	2.94953	2.48414	6.0492	2.80787	3.51258	-0.00747829	-40.5659	-5.61636	3.39849	5.54742
	41.6	2771.78	2644.51	2666.85	2680.25	2703.37	2772.43	3357.26	2667.65	2734.26	2691.5				41.6	2.59924	3.41956	6.11507	1.43155	3.79526	-1.42323	-41.6287	-5.62397	2.97698	4.10604
	41.8	2771.15	2643.63	2665.53	2680.06	2702.54	2772.8	3365.67	2668.78	2733.67	2690.81				41.8	2.42103	4.72725	5.26435	0.938301	4.046	-2.51636	-43.2021	-5.63233	3.16781	2.499
	42	2770.89	2642.66	2664.8	2679.81	2701.77	2773.46	3374.52	2669.85	2732.94	2690.44				42	0.381561	5.17664	3.18719	1.53965	3.99482	-4.19238	-44.2727	-4.4014	4.37238	1.86917
	42.2	2770.91	2641.58	2664.19	2679.43	2700.98	2774.45	3383.36	2670.63	2731.94	2689.99				42.2	0.0275208	5.36449	2.23462	2.40332	3.45155	-5.2155	-44.9209	-4.81416	5.07042	2.72248
	42.4	2770.8	2640.52	2663.81	2678.88	2700.42	2775.56	3392.51	2671.89	2730.92	2689.37				42.4	1.11289	5.50149	3.20846	2.58165	2.37137	-6.35627	-46.2829	-7.4753	5.81767	3.06864
	42.6	2770.47	2639.38	2662.94	2678.39	2700.02	2777.02	3401.79	2673.59	2729.64	2688.75				42.6	1.66332	5.58928	3.38983	2.83432	1.48787	-8.04916	-46.1115	-9.12921	6.19538	3.4651
	42.8	2770.08	2638.29	2662.46	2677.75	2699.8	2778.77	3410.85	2675.58	2728.51	2687.92				42.8	3.20683	5.8015	3.23468	3.08635	1.1647	-9.59769	-43.9497	-11.347	5.23533	5.21936
	43	2769.16	2637.13	2661.55	2677.17	2699.56	2780.84	3419.44	2678.18	2727.55	2686.74				43	5.4938	4.71143	5.10807	3.25245	0.699403	-10.7997	-43.236	-14.6617	4.3197	5.34441
	43.2	2767.98	2636.43	2660.46	2676.46	2699.52	2783.06	3428.21	2681.41	2726.78	2685.84				43.2	5.90483	3.09333	5.98076	3.01813	0.0929388	-11.5051	-43.6355	-17.1441	3.64087	4.23995
	43.4	2766.86	2635.82	2659.21	2675.91	2699.48	2785.44	3436.86	2685.07	2726.14	2684.94				43.4	5.50546	3.38809	5.89267	3.84766	0.278514	-12.2989	-43.1639	-20.2176	1.83777	5.60495
	43.6	2765.85	2635.17	2658.11	2674.96	2699.44	2787.95	3445.51	2689.59	2725.99	2683.65				43.6	3.9925	1.4841	5.98172	4.11341	-0.0067269	-12.3102	-43.4896	-25.1447	1.096	5.99979
	43.8	2765.32	2635.23	2656.88	2674.36	2699.55	2790.4	3454.27	2695.06	2725.63	2682.63				43.8	1.33474	-0.675912	4.92104	2.57941	-1.55326	-12.782	-44.3496	-28.4063	1.88135	4.42689
	44	2765.28	2635.31	2656.2	2673.91	2700.06	2793.21	3463.13	2700.91	2725.27	2681.77				44	-0.541035	-0.132696	2.7634	1.58044	-2.95645	-16.0723	-43.0024	-30.9935	1.69006	5.23635
	44.2	2765.51	2635.26	2655.73	2673.72	2700.71	2796.86	3471.36	2707.51	2724.95	2680.57				44.2	-2.03636	0.620554	1.73903	0.968884	-3.84715	-19.8597	-39.6364	-34.9561	1.38777	5.38238
	44.4	2766.07	2635.11	2655.52	2673.64	2701.62	2801.04	3478.99	2714.85	2724.63	2679.75				44.4	-3.34313	0.0875842	0.253134	-2.27067	-5.2033	-21.1492	-36.8794	-38.045	2.67512	2.72047
	44.6	2766.73	2635.14	2655.61	2674.52	2702.8	2805.39	3486.04	2722.68	2723.86	2679.39				44.6	-2.40281	1.49745	-0.989033	-3.51263	-6.8242	-24.2963	-32.984	-39.9486	4.45781	2.17471
	44.8	2766.97	2634.52	2655.84	2674.91	2704.3	2810.74	3492.11	2730.96	2722.93	2678.84				44.8	-0.423912	2.63994	-0.783241	-1.93762	-7.62864	-27.2686	-27.6185	-44.3304	4.59305	2.61168
	45	2766.96	2634.14	2655.93	2675.42	2705.82	2816.13	3497.15	2740.5	2722.03	2678.43				45	0.141655	2.73681	-0.832101	-3.2204	-7.72313	-26.6062	-23.5376	-50.2952	4.66274	0.95194
	45.2	2766.94	2633.5	2656.2	2676.17	2707.43	2821.45	3501.56	2751.05	2721.07	2678.39				45.2	0.394462	1.77363	-1.36295	-3.88944	-8.61312	-27.323	-20.1566	-55.3928	4.83132	0.573494
	45.4	2766.84	2633.53	2656.46	2676.87	2709.27	2827.22	3505.15	2762.68	2720.18	2678.13				45.4	0.300418	-1.01229	-1.43503	-2.23426	-9.56719	-31.2688	-15.3058	-60.7185	3.56065	1.78128
	45.6	2766.92	2633.9	2656.78	2677.18	2711.27	2833.95	3507.74	2775.42	2719.67	2677.76				45.6	-1.54965	-3.42828	-1.87241	-3.00819	-10.4922	-34.7396	-11.5482	-67.8184	1.6755	1.2199
	45.8	2767.5	2634.9	2657.19	2678.17	2713.56	2841.11	3509.84	2789.76	2719.38	2677.65				45.8	-4.20936	-5.67864	-1.99819	-5.67855	-13.136	-37.8765	-9.11514	-73.8617	2.3623	0.498685
	46	2768.53	2636.16	2657.59	2679.36	2716.54	2849.18	3511.34	2804.92	2718.7	2677.52				46	-5.49091	-8.13264	-2.15281	-6.14173	-15.9979	-42.5514	-5.63136	-79.0867	3.331	0.631155
	46.2	2769.63	2638.05	2658.07	2680.66	2719.92	2858.13	3512.12	2821.42	2718.09	2677.43				46.2	-5.67189	-8.92307	-2.70959	-7.47208	-17.9799	-47.116	-2.82861	-84.9649	3.11395	-0.0246087
	46.4	2770.8	2639.59	2658.66	2682.32	2723.77	2867.99	3512.52	2838.87	2717.39	2677.49				46.4	-6.00445	-6.94737	-2.99474	-8.36038	-20.7977	-51.1817	-0.913885	-90.1664	4.46424	0.0739429
	46.6	2772.03	2640.86	2659.31	2683.97	2728.23	2878.54	3512.44	2857.42	2716.31	2677.36				46.6	-6.09241	-5.92772	-3.8284	-8.56411	-23.5988	-54.0891	1.98451	-94.1253	6.12296	0.879728
	46.8	2773.26	2641.98	2660.28	2685.77	2733.14	2889.6	3511.7	2876.54	2715.12	2677.16				46.8	-6.60478	-5.19765	-6.31228	-9.1429	-24.928	-56.5309	5.25581	-98.666	4.05248	1.12934
	47	2774.72	2642.98	2661.8	2687.65	2738.26	2901.19	3510.39	2896.88	2714.69	2676.88				47	-7.9565	-5.07788	-7.85221	-9.99686	-27.4195	-59.6995	7.4184	-103.114	2.1411	2.03355
	47.2	2776.45	2644.06	2663.45	2689.84	2744.12	2913.48	3508.7	2917.73	2714.17	2676.38				47.2	-9.29007	-5.61418	-10.0171	-12.0273	-30.2513	-62.8408	10.297	-106.442	2.54244	2.53302
	47.4	2778.44	2645.29	2665.85	2692.56	2750.3	2926.31	3506.2	2939.49	2713.78	2675.96				47.4	-10.8244	-7.42474	-13.2814	-15.831	-31.7612	-65.5914	14.5315	-110.602	0.565277	1.28626
	47.6	2780.77	2647.05	2668.67	2696.19	2756.86	2939.76	3502.9	2961.97	2713.93	2675.86				47.6	-12.2799	-9.56866	-14.5696	-19.8688	-34.0145	-69.0298	18.4272	-114.914	-1.51258	0.361837
	47.8	2783.3	2649.12	2671.66	2700.47	2763.97	2953.99	3498.9	2985.36	2714.19	2675.8				47.8	-12.7154	-11.657	-15.3762	-22.9226	-37.3548	-73.8547	20.9625	-117.464	0.195089	-0.0412089
	48	2785.88	2651.71	2674.91	2705.38	2771.82	2969.25	3494.49	3008.87	2713.87	2675.92				48	-13.4408	-13.5734	-18.1885	-26.5356	-40.6191	-77.7178	24.3877	-118.68	1.40614	-1.51289
	48.2	2788.76	2654.54	2678.89	2711.04	2780.33	2985.01	3489.19	3032.78	2713.72	2676.37				48.2	-15.6863	-15.2848	-19.9676	-29.3314	-45.9618	-80.407	27.1513	-119.452	0.531894	-2.42181
	48.4	2792.18	2657.84	2682.85	2717.09	2790.31	3001.43	3483.76	3056.54	2713.56	2676.86				48.4	-18.1316	-17.327	-20.6388	-31.7045	-53.0652	-83.5019	27.445	-118.586	1.95879	-2.73054
	48.6	2796.08	2661.51	2687.28	2723.75	2801.51	3018.45	3478.21	3080.05	2712.97	2677.47				48.6	-21.5344	-19.9393	-24.2239	-34.5534	-58.8847	-87.2516	27.9897	-114.766	2.72126	-3.10016
	48.8	2800.9	2665.83	2692.54	2730.97	2813.88	3036.32	3472.55	3102.4	2712.55	2678.14				48.8	-26.9742	-22.7837	-27.503	-38.5271	-65.2277	-90.7093	28.9	-110.478	1.82297	-4.39349
	49	2806.84	2670.63	2698.23	2739.15	2827.59	3054.73	3466.72	3124.19	2712.23	2679.22				49	-31.6905	-25.7646	-29.4727	-42.1308	-71.7295	-94.2283	28.3964	-105.606	1.24282	-5.54725
	49.2	2813.57	2676.19	2704.41	2747.82	2842.41	3073.99	3461.2	3144.52	2712.03	2680.28				49.2	-36.3685	-29.6104	-33.0471	-45.722	-75.1527	-97.6305	27.8185	-98.754	1.36966	-5.05506
	49.4	2821.39	2682.49	2711.51	2757.46	2857.61	3093.61	3455.58	3163.58	2711.73	2681.27				49.4	-41.1489	-33.5587	-37.8939	-49.7232	-78.0751	-98.0457	27.7052	-90.0091	0.488663	-5.18428
	49.6	2829.94	2689.63	2719.53	2767.7	2873.71	3113.06	3450.16	3180.49	2711.84	2682.43				49.6	-44.2916	-37.9602	-41.657	-53.3861	-82.6174	-96.2257	26.758	-80.9848	-0.432287	-7.03326
	49.8	2839.04	2697.64	2728.22	2778.82	2890.62	3132.03	3444.84	3195.9	2711.9	2684.01				49.8	-46.2849	-41.6557	-46.1661	-57.1557	-86.1664	-93.4752	26.3771	-70.9797	-1.22024	-7.37595
	50	2848.53	2706.28	2738.06	2790.62	2908.19	3150.39	3439.57	3208.79	2712.31	2685.34				50	-49.7957	-44.9798	-51.9565	-62.0828	-89.8342	-89.8322	26.4827	-59.2361	-1.73239	-6.72047
	50.2	2858.99	2715.69	2748.96	2803.67	2926.62	3167.9	3434.2	3219.61	2712.58	2686.84				50.2	-53.6049	-49.4493	-56.6849	-67.1173	-94.8295	-84.865	27.4571	-47.692	-2.22609	-9.0389
	50.4	2870.04	2726.1	2760.77	2817.51	2946.07	3184.42	3428.58	3227.93	2713.15	2688.96				50.4	-58.3584	-54.6561	-62.0774	-72.8858	-98.8979	-81.7856	28.5659	-37.2249	-1.88417	-11.1185
	50.6	2882.5	2737.55	2773.85	2832.89	2966.13	3200.61	3422.81	3234.57	2713.28	2691.23				50.6	-66.1782	-59.3387	-68.6329	-79.8212	-102.229	-78.6842	29.1315	-28.1003	-0.580049	-11.7896
	50.8	2896.55	2749.98	2788.2	2849.4	2986.94	3215.83	3416.95	3239.19	2713.4	2693.74				50.8	-74.3443	-66.7723	-74.8466	-86.0858	-105.39	-74.3117	29.2238	-18.8092	0.198439	-13.6555
	51	2912.2	2764.34	2803.73	2867.22	3008.18	3230.28	3411.11	3242.24	2713.22	2696.78				51	-81.7461	-75.6985	-79.9545	-90.5005	-106.522	-69.2842	29.5204	-12.1095	0.820034	-17.2428
	51.2	2929.22	2780.14	2820.19	2885.57	3029.51	3243.43	3405.18	3244.11	2713.12	2700.6				51.2	-88.9516	-82.1314	-85.419	-94.5234	-107.153	-62.5646	28.9938	-6.56057	0.812168	-20.017
	51.4	2947.69	2797.14	2837.87	2905.04	3051.06	3255.18	3399.5	3244.89	2712.95	2704.73				51.4	-94.5317	-87.8202	-90.2395	-99.0753	-108.494	-53.4521	28.7755	-1.1033	-0.203634	-21.6159
	51.6	2966.92	2815.22	2856.26	2925.12	3072.8	3264.81	3393.65	3244.67	2713.21	2709.32				51.6	-97.9972	-93.0699	-94.5714	-101.986	-107.942	-44.792	29.0728	2.40923	-1.25025	-24.7896
	51.8	2986.96	2834.24	2875.74	2945.82	3094.09	3273.02	3387.87	3244.06	2713.43	2714.66				51.8	-102.965	-95.7356	-99.8303	-104.553	-104.793	-34.7786	29.3696	3.63443	-1.86866	-28.1415
	52	3008.19	2853.59	2896.21	2967.02	3114.73	3278.68	3381.92	3243.21	2713.97	2720.49				52	-109.345	-99.7849	-105.355	-108.684	-102.433	-23.5287	29.4311	5.44295	-3.15453	-29.7277
	52.2	3030.72	2874.29	2917.85	2989.32	3134.99	3282.63	3376.15	3241.97	2714.61	2726.55				52.2	-115.895	-106.678	-110.324	-113.704	-99.1135	-16.1403	28.6554	5.71219	-2.86908	-31.2992
	52.4	3054.63	2896.17	2940.29	3012.32	3154.14	3285.21	3370.49	3241	2715.08	2733.1				52.4	-123.93	-111.527	-114.594	-115.204	-91.6148	-10.0507	27.321	4.53901	-1.84254	-34.9599
	52.6	3080.3	2918.86	2963.58	3035.31	3171.52	3286.58	3365.2	3240.07	2715.41	2740.43				52.6	-132.241	-115.783	-117.237	-115.358	-82.4323	-2.21554	26.3464	5.09464	-2.24059	-36.46
	52.8	3107.35	2942.48	2987.05	3058.43	3187.14	3286.21	3359.93	3238.97	2715.95	2747.67				52.8	-137.57	-120.698	-117.592	-115.584	-74.3175	3.61751	25.6004	5.60535	-1.98814	-37.6675
	53	3135.16	2966.89	3010.58	3081.36	3201.11	3285.31	3354.96	3237.93	2716.17	2755.65				53	-140.311	-121.074	-117.621	-112.883	-63.6683	6.29077	24.6402	4.13319	-0.853827	-41.8245
	53.2	3163.32	2990.72	3034.03	3103.35	3212.48	3283.69	3349.99	3237.28	2716.38	2764.39				53.2	-140.754	-118.119	-116.705	-106.095	-50.5817	9.63799	25.4033	3.45983	-1.53628	-45.408
	53.4	3191.3	3014.2	3057.11	3123.72	3221.45	3281.52	3344.77	3236.48	2716.81	2773.82				53.4	-138.725	-117.011	-113.139	-98.4627	-39.7402	11.9783	26.6348	4.05701	-2.65369	-49.0512
	53.6	3218.69	3037.5	3079.2	3142.67	3228.45	3279.04	3339.37	3235.68	2717.39	2784.05				53.6	-134.838	-115.711	-108.45	-90.1638	-30.2786	11.9712	27.0032	3.99898	-2.69498	-53.5904
	53.8	3245.13	3060.32	3100.42	3159.62	3233.53	3276.82	3333.96	3234.9	2717.92	2795.17				53.8	-129.286	-111.494	-103.101	-78.7326	-19.7955	10.4428	27.7594	3.2762	-3.27465	-56.7006
	54	3270.38	3081.98	3120.24	3174.12	3236.42	3274.83	3328.28	3234.26	2718.72	2806.63				54	-123.811	-105.51	-94.2785	-66.6983	-10.0188	9.58931	28.5809	4.65697	-4.26064	-57.9213
	54.2	3294.57	3102.43	3137.98	3186.35	3237.7	3272.92	3322.62	3232.97	2719.54	2818.35				54.2	-117.053	-98.3923	-83.0555	-55.7564	-3.23689	9.98493	27.5005	7.51592	-3.77642	-59.9256
	54.4	3317.01	3121.11	3153.43	3196.44	3237.79	3270.83	3317.29	3231.39	2720.2	2830.49				54.4	-106.953	-87.5737	-71.8064	-45.0727	2.73318	10.4637	26.272	7.56967	-2.96216	-59.7135
	54.6	3337.2	3137.23	3166.59	3204.37	3236.7	3268.75	3312.08	3229.94	2720.72	2842.22				54.6	-94.7289	-72.876	-58.6382	-34.0813	7.4286	10.3786	25.8086	7.54626	-2.03665	-59.1568
	54.8	3354.79	3150.21	3176.81	3210.11	3234.98	3266.63	3307.02	3228.23	2720.99	2854.24				54.8	-81.2164	-57.5254	-44.0192	-23.7826	9.35722	11.2732	24.1318	10.6203	-0.742913	-60.5119
	55	3369.51	3160.32	3184.3	3213.94	3233.08	3264.23	3302.4	3225.79	2721.01	2866.45				55	-64.4481	-43.7428	-31.137	-14.2523	9.22224	12.3599	22.8864	11.7041	0.805389	-62.2628
	55.2	3380.55	3167.75	3189.39	3215.9	3231.3	3261.67	3297.74	3223.64	2720.74	2879.08				55.2	-47.4463	-30.3776	-20.3509	-5.9642	9.39322	13.62	24.1105	10.8028	0.938259	-62.673
	55.4	3388.59	3172.58	3192.55	3216.47	3229.35	3258.8	3292.76	3221.34	2720.63	2891.47				55.4	-32.1188	-18.822	-11.0307	-0.0951722	8.86626	14.5446	24.9801	12.6787	1.2637	-62.3686
	55.6	3393.52	3175.44	3194.01	3216.04	3227.72	3255.88	3287.78	3218.62	2720.25	2904.01				55.6	-18.5613	-9.76427	-5.19453	4.3719	8.78917	15.0625	25.1617	13.7224	1.57032	-62.1617
	55.8	3396.22	3176.65	3194.77	3214.87	3225.71	3252.74	3282.67	3216.01	2720.1	2916.22				55.8	-8.36416	-3.24184	-1.53656	6.40405	11.2469	16.2959	26.0374	11.5859	0.143641	-60.1133
	56	3397.05	3176.85	3194.63	3213.58	3223.21	3249.38	3277.43	3213.91	2720.22	2927.89				56	-0.899116	1.5529	2.44381	6.97277	13.6119	17.4055	25.8206	11.0386	-1.73438	-55.0151
	56.2	3396.72	3176.09	3193.84	3212.1	3220.33	3245.94	3272.46	3211.54	2720.72	2938.19				56.2	4.56194	5.58543	5.56938	7.39018	14.6379	15.4079	23.2588	11.6518	-2.12147	-49.458
	56.4	3395.42	3174.71	3192.46	3210.62	3217.35	3243.2	3268.07	3209.32	2721.05	2947.77				56.4	6.74347	8.2154	7.64067	7.85154	16.1911	13.8202	22.0168	10.675	-2.4031	-46.0472
	56.6	3394.14	3172.94	3190.78	3208.96	3213.9	3240.31	3263.59	3207.24	2721.7	2956.56				56.6	7.1877	8.42835	10.1191	8.13484	17.108	14.3198	21.8819	10.1889	-3.44998	-41.4841
	56.8	3392.54	3171.36	3188.46	3207.35	3210.64	3237.54	3259.3	3205.13	2722.34	2964.33				56.8	8.13482	8.51664	11.9604	8.83385	15.4648	13.3316	21.7098	11.8506	-2.75211	-36.2038
	57	3390.94	3169.53	3186.13	3205.47	3207.72	3234.97	3254.82	3202.45	2722.75	2971.18				57	7.9803	8.82431	11.1453	8.58186	13.9692	12.3611	23.1278	14.279	-1.01923	-33.6669
	57.2	3389.38	3167.88	3184.03	3203.92	3205.01	3232.5	3249.98	3199.48	2722.78	2977.82				57.2	7.18779	7.99719	10.1631	8.23955	13.1979	13.3076	25.822	15.2717	0.156637	-31.5396
	57.4	3387.98	3166.28	3182.01	3202.07	3202.38	3229.65	3244.59	3196.32	2722.74	2983.68				57.4	8.16682	8.22427	10.3292	10.0648	13.4499	14.0391	26.6647	16.726	0.152474	-26.9005
	57.6	3386.1	3164.56	3179.89	3199.92	3199.6	3226.9	3239.4	3192.72	2722.71	2988.62				57.6	9.3873	9.02498	10.3903	10.9999	14.0054	14.2567	26.0996	19.8196	0.63495	-23.2147
	57.8	3384.3	3162.67	3177.87	3197.69	3196.78	3223.88	3234.16	3188.49	2722.55	2993.02				57.8	8.97477	9.76121	10.1286	11.5461	14.2232	15.9459	25.4298	21.181	0.0186585	-20.785
	58	3382.48	3160.63	3175.79	3195.22	3193.85	3220.53	3229.26	3184.41	2722.73	2996.85				58	9.34026	11.055	10.7891	13.8142	15.6511	17.2112	24.355	19.3443	-1.01317	-16.2888
	58.2	3380.54	3158.31	3173.52	3192.19	3190.48	3217	3224.44	3180.73	2722.97	2999.56				58.2	10.2959	11.2049	12.1002	15.605	18.0229	18.2267	22.8477	18.1663	-2.3549	-12.2008
	58.4	3378.39	3156.24	3171.03	3189.12	3186.77	3213.21	3220.08	3177.1	2723.67	3001.85				58.4	10.3486	9.65741	11.9493	14.6257	17.8756	20.1038	22.0807	18.1822	-3.71629	-10.5033
	58.6	3376.36	3154.44	3168.8	3186.33	3183.37	3209.04	3215.55	3173.57	2724.41	3003.74				58.6	11.0615	8.63475	10.6346	14.1009	16.9745	20.6197	22.4018	15.8499	-4.19123	-8.10565
	58.8	3373.91	3152.79	3166.73	3183.45	3179.88	3205.05	3211.12	3170.75	2725.29	3005.08				58.8	13.0658	7.58137	10.4006	14.337	18.2905	19.4079	22.4098	13.688	-3.59111	-5.43939
	59	3371.18	3151.38	3164.67	3180.64	3176.09	3201.21	3206.6	3167.94	2725.88	3005.99				59	14.1773	6.59729	9.7592	13.7516	18.9046	19.6374	22.0697	14.4819	-3.98231	-4.22087
	59.2	3368.28	3149.99	3162.89	3177.96	3172.4	3197.2	3202.27	3164.93	2726.86	3006.76				59.2	14.4892	8.59517	7.83416	12.7953	17.7751	19.8459	22.2825	15.527	-4.05393	-2.73667
	59.4	3365.4	3147.9	3161.47	3175.44	3168.92	3193.36	3197.65	3161.8	2727.43	3007.05				59.4	14.5613	11.1302	7.10809	13.4265	17.9126	18.2578	23.211	15.0473	-2.38298	-0.563641
	59.6	3362.49	3145.6	3159.97	3172.59	3165.18	3189.84	3192.98	3158.87	2727.9	3007.04				59.6	14.0692	12.4614	7.84115	14.0684	19.1023	17.9483	23.9104	15.5189	-2.41304	0.449739
	59.8	3359.77	3142.96	3158.38	3169.87	3161.35	3186.15	3188.04	3155.56	2728.44	3006.88				59.8	13.6266	13.3535	7.35876	13.5541	19.0274	18.4016	25.696	16.7521	-3.50626	1.47875
	60	3356.99	3140.38	3156.98	3167.14	3157.66	3182.59	3182.75	3152.23	2729.22	3006.46				60	14.0328	12.1871	7.71794	13.7077	17.1214	16.5037	26.5451	16.7835	-2.84596	2.46675
	60.2	3354.14	3138.18	3155.2	3164.35	3154.45	3179.5	3177.48	3148.87	2729.58	3005.97				60.2	14.7449	9.27547	9.87153	14.6576	16.2616	15.6252	26.2197	16.3242	-2.04963	1.98965
	60.4	3351.11	3136.57	3153.03	3161.35	3151.11	3176.3	3172.24	3145.69	2730.17	3005.65				60.4	15.0992	8.18889	11.8226	14.0857	16.4752	15.4705	26.5595	16.0538	-3.79157	1.80555
	60.6	3348.09	3134.8	3150.44	3158.73	3147.91	3173.39	3166.89	3142.43	2731.09	3005.15				60.6	15.689	8.88057	14.2136	13.2329	15.5238	13.5823	26.434	16.3667	-5.28042	3.5113
	60.8	3344.83	3132.99	3147.32	3156.01	3144.9	3170.83	3161.76	3139.16	2732.22	3004.29				60.8	16.4887	9.61066	17.0275	13.4635	14.4526	12.4837	24.3599	16.1943	-5.57356	4.16645
	61	3341.55	3130.85	3143.7	3153.39	3142.02	3168.28	3157.08	3135.96	2733.36	3003.53				61	16.0682	12.4054	18.7259	12.7484	15.614	13.7671	23.8115	15.6911	-6.444	3.93585
	61.2	3338.41	3128.05	3139.92	3150.91	3138.67	3165.33	3152.21	3132.84	2734.9	3002.65				61.2	15.5112	15.0759	18.9708	11.8693	16.1759	14.4844	23.8102	16.171	-9.42276	5.12977
	61.4	3335.27	3125.01	3136.18	3148.55	3135.6	3162.46	3147.65	3129.46	2737.08	3001.5				61.4	16.4887	14.1119	18.33	12.6747	15.7082	15.6122	21.6252	17.3973	-11.4914	5.97224
	61.6	3331.8	3122.44	3132.7	3145.8	3132.31	3159.02	3143.49	3125.99	2739.35	3000.39				61.6	17.5618	12.7711	15.5756	14.0611	16.891	18.0561	20.9226	16.2963	-10.7391	4.27479
	61.8	3328.29	3119.84	3129.93	3142.92	3128.84	3155.29	3139.15	3122.93	2741.39	2999.76				61.8	17.6593	12.8281	13.2938	15.5454	17.9172	19.4539	22.6965	15.5524	-10.5173	3.3113
	62	3324.7	3117.34	3127.31	3139.59	3125.19	3151.32	3134.45	3119.69	2743.67	2998.99				62	18.6058	12.1697	12.4123	16.9665	18.078	19.537	23.2334	16.516	-12.7685	3.84762
	62.2	3320.83	3114.98	3124.92	3136.16	3121.6	3147.53	3129.86	3116.41	2746.36	2998.2				62.2	19.8895	11.0608	12.1431	17.9715	18.6547	18.5542	23.7015	15.705	-12.0999	4.60361
	62.4	3316.82	3112.77	3122.41	3132.43	3117.76	3143.86	3124.91	3113.43	2748.46	2997.13				62.4	19.7835	12.7113	12.501	18.4898	18.6477	18.4896	25.6998	14.4085	-10.2643	5.32436
	62.6	3312.97	3109.86	3119.86	3128.84	3114.19	3140.12	3119.71	3110.51	2750.69	2996				62.6	18.9648	14.8388	13.8965	17.7114	17.6244	18.6096	25.2697	15.9107	-12.778	7.43373
	62.8	3309.23	3106.93	3116.85	3125.42	3110.69	3136.41	3114.92	3107.09	2753.63	2994.15				62.8	18.3789	15.0224	15.145	15.6125	17.1346	18.6929	22.704	16.6127	-16.1106	9.65231
	63	3305.62	3103.9	3113.83	3122.52	3107.33	3132.6	3110.56	3103.94	2757.02	2992.2				63	17.7699	14.5084	15.8483	14.9996	16.7281	19.5596	21.5922	15.5269	-16.8037	10.7561
	63.2	3302.13	3101.12	3110.54	3119.36	3103.99	3128.59	3106.24	3100.78	2760.44	2989.87				63.2	16.995	14.4298	16.0896	15.396	16.4432	20.5326	21.3179	16.7316	-19.3706	11.6182
	63.4	3298.82	3098.17	3107.4	3116.38	3100.74	3124.48	3102.09	3097.27	2764.82	2987.58				63.4	16.2431	13.5433	16.1485	14.9482	16.4641	19.6271	19.7208	17.5069	-23.1015	12.0816
	63.6	3295.63	3095.75	3104.04	3113.26	3097.39	3120.73	3098.28	3093.84	2769.56	2985.11				63.6	15.3293	11.6291	17.1094	16.763	16.7482	18.9597	19.3378	16.9565	-24.3669	11.2855
	63.8	3292.63	3093.42	3100.59	3109.62	3094.08	3116.89	3094.26	3090.45	2774.55	2983.08				63.8	15.378	11.7853	17.5698	19.7551	16.2791	18.6457	20.8851	17.302	-25.4695	10.1727
	64	3289.44	3091.01	3097.05	3105.48	3090.89	3113.35	3090	3086.9	2779.81	2980.98				64	15.9846	12.1233	17.2984	20.305	15.5212	16.7885	20.9192	18.1067	-27.9512	10.3765
	64.2	3286.24	3088.55	3093.65	3101.55	3087.8	3110.13	3085.93	3083.27	2785.73	2978.97				64.2	16.4229	12.674	17.5091	20.0839	16.0222	15.9071	20.1549	17.5853	-30.228	9.77322
	64.4	3282.84	3085.87	3090.04	3097.47	3084.45	3106.9	3081.89	3079.85	2791.9	2977.07				64.4	17.3472	14.6441	17.9492	19.8603	17.2674	16.4726	20.4156	17.5307	-32.4034	9.12838
	64.6	3279.23	3082.72	3086.51	3093.71	3080.96	3103.53	3077.72	3076.26	2798.72	2975.22				64.6	19.7276	16.0422	17.4809	17.6717	17.0118	16.8734	21.6126	17.2558	-35.1238	10.2362
	64.8	3275.03	3079.55	3083.02	3090.37	3077.61	3100.1	3073.3	3072.94	2805.93	2972.96				64.8	20.6667	15.3788	17.3649	16.0008	17.468	18.2163	21.4306	17.2643	-37.296	11.5022
	65	3271.05	3076.52	3079.51	3087.21	3073.94	3096.18	3069.15	3069.34	2813.63	2970.7				65	19.9869	15.957	18.2543	16.1728	18.8613	20.7546	21.3897	17.4554	-39.5173	11.1413
	65.2	3267.01	3073.17	3075.73	3083.9	3070.18	3091.85	3064.72	3065.96	2821.75	2968.47				65.2	20.0077	16.6322	18.9515	15.8998	17.8291	22.367	22.1009	17.4491	-41.9419	11.528
	65.4	3263.05	3069.97	3071.97	3080.75	3066.82	3087.34	3060.35	3062.35	2830.43	2966.02				65.4	20.1078	15.325	18.9357	17.4954	16.5573	22.1547	22.0145	17.7739	-44.7402	13.455
	65.6	3259	3067.01	3068.18	3076.85	3063.45	3083.02	3055.99	3058.82	2839.66	2963.17				65.6	19.4888	14.7345	18.6319	20.2167	17.5324	21.557	20.5402	18.6814	-47.8171	13.7115
	65.8	3255.24	3064.04	3064.52	3072.81	3059.81	3078.74	3052.14	3054.91	2849.58	2960.61				65.8	19.0787	14.7394	18.3451	19.933	18.2305	20.6344	19.0333	18.7717	-51.297	12.5298
	66	3251.31	3061.11	3060.84	3068.92	3056.18	3074.82	3048.3	3051.33	2860.16	2958.11				66	19.6639	14.7228	18.0332	19.2412	18.4164	18.519	18.9208	18.6214	-54.576	12.6761
	66.2	3247.37	3058.13	3057.33	3065.09	3052.43	3071.28	3044.55	3047.47	2871.31	2955.58				66.2	20.2193	15.1045	17.381	19.4402	19.0754	17.3527	19.0226	18.4878	-56.2822	12.1018
	66.4	3243.21	3055.06	3053.91	3061.26	3048.59	3067.76	3040.66	3043.98	2882.54	2953.38				66.4	21.2915	15.5094	16.2185	17.078	19.1884	18.5906	19.6139	17.3441	-55.7664	9.02006
	66.6	3238.9	3051.9	3050.78	3058.24	3044.82	3063.86	3036.68	3040.48	2893.55	2951.83				66.6	21.1958	16.3778	16.1235	15.0842	18.0551	19.4675	20.3729	17.3235	-54.3353	8.68012
	66.8	3234.68	3048.49	3047.42	3055.06	3041.36	3060.08	3032.46	3037.05	2904.25	2949.76				66.8	22.2249	17.8933	16.9413	16.3211	17.1479	18.0628	22.2047	17.3511	-52.678	11.1664
	67	3230.02	3044.82	3044.06	3051.72	3037.95	3056.58	3027.85	3033.57	2914.56	2947.45				67	23.1427	17.739	16.6188	16.9099	16.1234	17.9853	23.1765	16.8163	-49.6557	11.3711
	67.2	3225.52	3041.4	3040.77	3048.28	3034.84	3052.9	3023.33	3030.29	2924.12	2945.14				67.2	22.2013	17.4159	16.1713	17.7362	16.5041	17.7604	21.4915	16.8376	-46.8488	12.8574
	67.4	3221.21	3037.82	3037.5	3044.55	3031.34	3049.57	3019.24	3026.78	2933.37	2942.18				67.4	20.0336	17.9777	17.7028	20.2524	17.0516	15.6171	20.2647	18.0178	-45.61	17.191
	67.6	3217.45	3034.24	3033.74	3040.3	3028.03	3046.6	3015.16	3023.17	2942.33	2938.47				67.6	19.3412	17.8831	18.1944	20.3351	17.3149	14.3519	20.4762	17.3494	-43.6189	17.5947
	67.8	3213.49	3030.68	3030.31	3036.5	3024.38	3043.72	3011.11	3019.87	2950.76	2935.29				67.8	18.0459	17.4953	16.7543	18.9001	18.1496	15.2209	19.3104	16.1459	-40.3764	15.2995
	68	3210.22	3027.23	3026.96	3032.69	3020.78	3040.52	3007.42	3016.67	2958.53	2932.23				68	16.6612	17.5405	16.9775	18.8212	18.7667	15.8408	18.239	15.8409	-38.2413	15.865
	68.2	3206.7	3023.72	3023.48	3029.01	3016.92	3037.39	3003.71	3013.51	2966.05	2929				68.2	17.674	16.4266	17.8495	17.8851	18.4986	16.0917	19.3945	15.9942	-36.0827	15.3341
	68.4	3203.12	3020.65	3019.87	3025.56	3013.39	3034	2999.72	3010.3	2972.89	2926.22				68.4	19.0505	15.496	17.6752	16.4146	17.9951	17.9961	19.4459	15.4809	-32.4213	12.2412
	68.6	3199.1	3017.48	3016.4	3022.38	3009.68	3030.18	2996	3007.29	2979.03	2924.02				68.6	20.0295	15.5183	17.8742	16.3753	18.6041	20.0022	18.1082	15.5361	-29.344	10.9159
	68.8	3195.13	3014.48	3012.71	3019	3006	3026.07	2992.4	3004.02	2984.6	2921.76				68.8	20.8031	14.6837	18.3375	16.433	18.0807	20.5085	18.5028	16.7985	-26.0864	11.3991
	69	3190.81	3011.56	3009.13	3015.83	3002.45	3021.99	2988.62	3000.56	2989.36	2919.51				69	21.0802	14.477	17.4138	15.9214	17.5617	20.8482	18.3207	18.2348	-20.8016	10.5232
	69.2	3186.71	3008.57	3005.75	3012.6	2998.96	3017.7	2985.11	2996.78	2992.92	2917.54				69.2	20.9024	16.5695	16.423	16.1428	17.4149	22.0059	17.2166	18.6455	-15.4427	9.77495
	69.4	3182.39	3004.97	3002.52	3009.38	2995.49	3013.28	2981.66	2993.14	2995.62	2915.51				69.4	21.9399	17.9066	16.3602	15.9633	17.174	21.5241	17.5753	18.5348	-11.6083	10.7151
	69.6	3177.98	3001.53	2999.22	3006.19	2992.12	3009.18	2978.05	2989.41	2997.58	2913.18				69.6	22.0589	16.8417	15.867	16.0896	16.268	19.4241	18.4962	17.7549	-7.81137	12.8241
	69.8	3173.6	2998.18	2996.17	3002.89	2988.94	3005.46	2974.34	2986.05	2998.79	2910.41				69.8	21.6617	17.1463	15.4287	17.4022	16.3238	18.5195	17.7924	16.7092	-4.80451	14.2813
	70	3169.31	2994.64	2992.98	2999.26	2985.57	3001.74	2970.93	2982.68	2999.56	2907.48				70	21.6864	18.2175	16.387	18.0708	16.6406	18.1182	17.3005	16.4806	-2.94753	15.7154
	70.2	3165	2991.01	2989.62	2995.7	2982.29	2998.19	2967.38	2979.46	2999.95	2904.14				70.2	20.4384	16.9064	17.1736	17.8701	16.5824	17.9017	17.601	15.9934	-0.43951	16.9167
	70.4	3161.18	2987.89	2986.21	2992.03	2978.9	2994.56	2963.9	2976.26	2999.72	2900.77				70.4	18.2509	15.2608	15.9662	19.519	17.2818	17.9286	17.5608	15.929	2.45868	17.0538
	70.6	3157.64	2984.79	2983.17	2987.93	2975.39	2990.98	2960.37	2973.04	2999.03	2897.37				70.6	17.0105	15.8887	15.9792	20.4027	17.6492	18.6591	17.3934	16.8444	4.08622	16.3452
	70.8	3154.27	2981.55	2979.73	2983.98	2971.86	2987.08	2956.93	2969.59	2998.1	2894.25				70.8	17.5267	16.2233	17.8458	19.097	17.6985	19.8621	17.3204	16.5325	5.64808	15.5576
	71	3150.56	2978.36	2976.12	2980.27	2968.32	2983.13	2953.39	2966.51	2996.81	2891.17				71	19.2104	15.3405	17.9614	18.6436	17.7645	19.473	18.0731	14.6026	6.75021	14.3917
	71.2	3146.62	2975.37	2972.57	2976.53	2964.79	2979.39	2949.69	2963.68	2995.52	2888.49				71.2	20.2144	15.2622	17.6038	18.3334	17.3014	17.2355	19.0865	14.2227	5.60773	13.2231
	71.4	3142.49	2972.2	2969.03	2973.05	2961.42	2976.19	2945.81	2960.81	2994.53	2885.83				71.4	20.886	16.2597	18.3959	15.4081	16.4758	15.8974	19.0713	14.0197	5.15177	13.0738
	71.6	3138.24	2968.91	2965.28	2970.27	2958.16	2972.96	2942.11	2958.08	2993.39	2883.28				71.6	22.2655	16.2258	17.7929	14.2975	16.4811	15.7793	18.2157	13.421	6.02609	12.4321
	71.8	3133.68	2965.74	2961.99	2967.2	2954.86	2969.87	2938.53	2955.36	2992.13	2880.83				71.8	21.8848	15.7412	15.7103	15.6281	15.6771	15.4479	17.5844	14.5025	6.39595	12.0772
	72	3129.54	2962.58	2958.95	2964.05	2951.86	2966.68	2935.13	2952.28	2990.78	2878.35				72	20.532	16.0631	14.8222	16.0552	15.4308	16.9785	16.0842	15.451	7.62483	13.5686
	72.2	3125.38	2959.31	2956.03	2960.79	2948.61	2963.01	2932.11	2949.25	2989.04	2875.38				72.2	21.0227	16.395	14.233	16.2709	16.58	19.8912	14.2851	14.9067	9.74462	15.3437
	72.4	3121.14	2956.04	2953.2	2957.5	2945.21	2958.79	2929.35	2946.29	2986.95	2872.27				72.4	21.1496	16.2532	14.4992	17.4209	17.7424	21.5533	13.5882	14.9639	10.3782	15.8743
	72.6	3116.96	2952.77	2950.16	2953.86	2941.5	2954.53	2926.6	2943.21	2984.89	2869.04				72.6	20.6299	16.9362	16.1795	17.946	19.0408	20.6603	13.9747	16.0433	11.2818	16.464
	72.8	3112.89	2949.26	2946.73	2950.4	2937.57	2950.56	2923.7	2939.9	2982.46	2865.73				72.8	20.1845	17.6849	17.7006	16.9804	21.0808	19.5279	15.1103	16.4346	12.037	16.4381
	73	3108.92	2945.74	2943.13	2947.06	2933.2	2946.75	2920.49	2936.63	2980.14	2862.57				73	18.9334	17.4353	18.1928	16.2737	20.7205	17.9059	17.5138	17.0031	11.4964	14.3782
	73.2	3105.31	2942.3	2939.44	2943.84	2929.36	2943.42	2916.72	2933.1	2977.85	2859.95				73.2	17.8789	17.0635	19.2291	16.6337	19.0167	15.6666	19.533	17.862	11.2974	13.0073
	73.4	3101.71	2938.89	2935.53	2940.4	2925.56	2940.38	2912.78	2929.59	2975.61	2857.3				73.4	17.9817	17.2674	18.5903	17.0824	18.3662	15.1	19.7209	16.8935	11.3457	12.9223
	73.6	3098.13	2935.41	2932.08	2937.05	2922.1	2937.24	2908.88	2926.42	2973.34	2854.76				73.6	17.4972	17.0481	16.7623	16.5708	15.8919	17.2571	19.4565	14.4453	10.6253	12.8442
	73.8	3094.66	2932.08	2928.8	2933.77	2919.19	2933.51	2905.05	2923.78	2971.31	2852.11				73.8	18.0043	16.6152	15.3686	16.2335	13.4722	18.6069	18.3596	12.7925	10.9199	13.7498
	74	3090.9	2928.73	2925.89	2930.58	2916.56	2929.86	2901.62	2921.27	2968.98	2849.24				74	19.043	16.946	14.7488	15.494	14.124	18.7623	15.5311	11.6801	10.9027	15.2068
	74.2	3087.09	2925.29	2922.89	2927.56	2913.52	2926.02	2898.8	2919.06	2966.96	2846.12				74.2	19.2797	17.5488	14.1678	14.9632	14.8393	18.8263	13.5401	11.1275	10.5688	14.866
	74.4	3083.21	2921.75	2920.2	2924.53	2910.66	2922.41	2896.13	2916.72	2964.69	2843.33				74.4	19.0953	17.19	13.8847	15.5662	14.4457	17.5601	12.9566	12.2481	11.7879	13.9176
	74.6	3079.45	2918.41	2917.29	2921.34	2907.66	2919.05	2893.6	2914.13	2962.31	2840.49				74.6	18.9672	17.0663	14.3929	15.7196	15.811	15.4574	12.3385	13.9257	11.6758	14.5188
	74.8	3075.68	2914.9	2914.4	2918.2	2904.35	2916.19	2891.11	2911.2	2960.07	2837.61				74.8	17.815	17.5983	15.6437	16.7411	16.9458	13.9908	13.21	14.6956	10.3762	13.2005
	75	3072.29	2911.4	2911.02	2914.61	2900.94	2913.38	2888.29	2908.3	2958.06	2835.22				75	17.462	17.3288	17.1011	18.5466	16.9718	13.7215	14.6183	14.4708	11.2001	11.5643
	75.2	3068.65	2907.97	2907.6	2910.88	2897.55	2910.63	2885.31	2905.42	2955.57	2832.9				75.2	17.9334	16.9108	17.5549	18.4887	17.3643	14.4712	14.9155	14.1939	12.369	11.6993
	75.4	3065.19	2904.62	2903.97	2907.27	2894.01	2907.54	2882.28	2902.6	2953.14	2830.52				75.4	16.8331	17.0713	18.8164	17.3779	17.4341	16.3543	16.1202	14.4539	12.608	12.1498
	75.6	3061.9	2901.17	2900.12	2903.89	2890.6	2904.17	2878.84	2899.65	2950.43	2828.09				75.6	16.0454	16.7966	19.3833	17.324	17.0986	16.5787	17.7953	14.4812	14.7143	11.3968
	75.8	3058.68	2897.94	2896.3	2900.41	2887.17	2900.91	2875.22	2896.8	2947.26	2825.9				75.8	16.8656	15.7094	18.4939	15.9338	16.986	16.6853	18.1664	14.5096	16.7902	12.0041
	76	3055.14	2894.85	2892.78	2897.52	2883.83	2897.46	2871.59	2893.78	2943.84	2823.24				76	18.0771	15.39	16.4713	14.3759	16.2444	17.7749	18.2496	15.9106	16.5994	13.4167
	76.2	3051.53	2891.75	2889.67	2894.58	2880.65	2893.9	2867.9	2890.48	2940.68	2820.57				76.2	17.698	15.5618	15.5042	14.2719	15.9824	17.0538	19.0753	16.4347	15.7541	13.9819
	76.4	3048.03	2888.61	2886.54	2891.79	2877.42	2890.72	2864.01	2887.29	2937.57	2817.68				76.4	18.0289	16.0218	15.1656	14.4486	16.0181	14.4248	19.1363	15.3188	14.2871	14.0097
	76.6	3044.28	2885.35	2883.59	2888.79	2874.23	2887.98	2860.31	2884.35	2934.96	2814.99				76.6	19.0178	16.2555	14.8749	14.8795	16.1359	14.9739	17.8716	14.5454	12.8597	13.6784
	76.8	3040.45	2882.08	2880.56	2885.85	2870.98	2884.68	2856.87	2881.47	2932.4	2812.21				76.8	19.5209	17.0091	15.0837	15.0757	16.0188	16.5327	16.4256	13.9421	11.841	13.4175
	77	3036.6	2878.54	2877.52	2882.76	2867.8	2881.47	2853.7	2878.78	2930.17	2809.64				77	17.5265	17.9977	15.9298	15.2361	16.4227	15.6016	16.0288	13.0646	11.6609	12.7073
	77.2	3033.39	2874.95	2874.18	2879.76	2864.43	2878.32	2850.51	2876.18	2927.68	2807.11				77.2	16.5614	17.6247	16.862	15.3341	16.2862	17.1215	14.6137	13.1167	12.6708	12.5012
	77.4	3029.84	2871.53	2870.8	2876.66	2861.29	2874.56	2847.86	2873.46	2925.14	2804.68				77.4	18.3793	16.5169	17.2332	14.7798	16.122	20.0488	12.9395	14.5057	12.8659	11.4487
	77.6	3026.11	2868.3	2867.31	2873.87	2857.99	2870.49	2845.23	2870.39	2922.55	2802.52				77.6	18.5194	16.3729	17.1744	13.5954	15.8725	19.115	13.2771	15.6229	12.6141	10.5442
	77.8	3022.48	2865	2863.94	2871.12	2854.96	2866.96	2842.54	2867.25	2920.01	2800.42				77.8	17.6012	15.7691	17.0395	14.4182	15.3591	17.4796	13.6486	16.0428	14.1319	10.5371
	78	3018.97	2862.03	2860.49	2868.07	2851.86	2863.44	2839.8	2863.99	2916.96	2798.32				78	18.8458	14.2655	17.1992	15.6973	14.624	17.4953	13.2743	16.3523	14.367	10.1918
	78.2	3014.98	2859.22	2857.14	2864.86	2849.11	2860.08	2837.16	2860.76	2914.34	2796.35				78.2	19.5266	14.3967	15.8913	16.537	13.8313	15.0513	14.4573	15.8248	13.0361	9.45449
	78.4	3011.32	2856.26	2854.15	2861.45	2846.25	2857.39	2834.04	2857.71	2911.61	2794.43				78.4	16.9325	14.7458	14.297	17.6738	14.4386	13.0124	15.1864	14.4296	14.7343	10.9041
	78.6	3008.14	2853.37	2851.34	2857.82	2843.32	2854.7	2831.17	2854.95	2908.49	2791.98				78.6	15.7675	13.9972	14.3047	18.3904	15.1193	14.4455	14.0654	13.6617	15.463	12.3079
	78.8	3004.95	2850.63	2848.41	2854.18	2840.23	2851.65	2828.35	2852.19	2905.53	2789.56				78.8	15.7004	13.9273	14.4614	17.45	15.3385	14.7436	14.4519	13.8633	13.8933	12.6085
	79	3001.86	2847.75	2845.51	2850.87	2837.17	2848.81	2825.38	2849.41	2902.85	2786.89				79	15.4496	14.7645	15.2085	16.1548	15.832	14.6888	15.1256	13.9339	14.2251	14.1996
	79.2	2998.75	2844.76	2842.27	2847.7	2833.85	2845.68	2822.4	2846.62	2899.82	2783.92				79.2	15.5664	14.8464	17.0409	15.2407	17.3838	16.6775	13.6774	13.93	15.027	15.1046
	79.4	2995.56	2841.84	2838.77	2844.75	2830.35	2842.21	2819.87	2843.85	2896.91	2780.96				79.4	17.1516	14.3328	17.5192	14.7127	16.3407	17.3614	13.1234	13.6364	14.0552	13.857
	79.6	2991.9	2838.97	2835.34	2841.77	2827.36	2838.84	2817.08	2841.19	2894.15	2778.38				79.6	18.5548	14.8877	16.5332	14.9646	14.5304	15.9637	14.0864	12.9324	14.2049	12.7834
	79.8	2988.23	2835.88	2832.14	2838.73	2824.42	2835.77	2814.36	2838.7	2891.26	2775.87				79.8	18.2738	15.6204	16.1059	15.7224	15.02	15.779	12.3943	11.9259	13.7547	11.2712
	80	2984.64	2832.78	2828.93	2835.51	2821.34	2832.53	2812.12	2836.42	2888.67	2773.91				80	17.1523	15.0532	15.0635	15.9302	15.6959	15.6217	10.7151	10.8075	12.9384	8.84391
	80.2	2981.36	2829.81	2826.12	2832.45	2818.24	2829.6	2809.94	2834.29	2886.06	2772.23				80.2	16.3368	15.3012	13.7723	14.479	14.3011	13.8427	11.6075	11.2549	12.9739	8.3062
	80.4	2978.09	2826.59	2823.35	2829.69	2815.53	2826.94	2807.49	2831.88	2883.57	2770.49				80.4	15.7739	17.1332	13.8668	13.7537	14.7008	13.229	12.1138	12.3806	11.2088	9.58544
	80.6	2975.05	2823.01	2820.54	2826.91	2812.3	2824.25	2805.14	2829.37	2881.57	2768.42				80.6	14.8674	17.7902	14.4456	13.6547	16.2103	13.6717	11.6639	12.7513	9.33916	10.1258
	80.8	2972.05	2819.52	2817.59	2824.26	2809.14	2821.46	2802.75	2826.76	2879.71	2766.43				80.8	15.7	17.5036	14.6504	12.8196	15.6899	14.2077	12.6869	13.5328	9.94418	10.8464
	81	2968.7	2816	2814.7	2821.74	2806.03	2818.55	2800.04	2823.96	2877.61	2764.1				81	17.9225	17.6875	14.5386	12.5598	15.2882	14.9892	14.1725	14.4721	10.0559	11.5357
	81.2	2964.91	2812.51	2811.78	2819.11	2803	2815.45	2797.15	2821.06	2875.73	2761.89				81.2	19.41	16.7524	14.3984	14.8913	15.4436	16.0196	14.292	13.6545	9.06446	10.8215
	81.4	2960.99	2809.38	2808.94	2815.85	2799.87	2812.19	2794.35	2818.54	2873.87	2759.8				81.4	19.8738	14.4256	14.3712	15.8864	15.0867	16.0101	13.9796	12.1511	10.3042	9.54633
	81.6	2956.97	2806.7	2806.02	2812.84	2796.94	2809.04	2791.51	2816.17	2871.58	2758.03				81.6	20.5941	12.8659	14.5415	15.1655	15.2551	16.3847	14.676	11.5641	11.8541	9.26781
	81.8	2952.81	2804.15	2803.11	2809.74	2793.76	2805.68	2788.45	2813.94	2869.19	2756.06				81.8	20.2672	12.6233	14.7588	15.5305	15.6461	16.0918	15.9363	10.3693	12.3402	9.4444
	82	2948.93	2801.61	2800.1	2806.64	2790.74	2802.65	2785.22	2812.02	2866.66	2754.22				82	18.6162	13.0487	15.2738	15.7742	14.6641	14.704	15.5683	8.96727	12.6259	10.1054
	82.2	2945.34	2798.94	2796.99	2803.48	2787.8	2799.72	2782.25	2810.25	2864.11	2752				82.2	17.762	13.1472	16.0932	15.0469	15.893	14.829	14.7596	9.39548	13.5223	11.1242
	82.4	2941.84	2796.31	2793.67	2800.63	2784.42	2796.7	2779.28	2808.19	2861.25	2749.8				82.4	16.4794	14.1812	16.7675	13.9758	16.5413	15.4559	14.8585	11.1292	14.4794	11.5007
	82.6	2938.73	2793.26	2790.34	2797.83	2781.34	2793.62	2776.4	2805.82	2858.36	2747.4				82.6	15.299	15.4401	16.3375	14.1797	14.0144	14.29	13.2153	12.3697	14.555	11.9373
	82.8	2935.66	2790.24	2787.19	2794.95	2778.77	2790.96	2774.03	2803.24	2855.45	2745.05				82.8	15.3135	14.4874	14.9794	14.4771	12.5074	13.7007	10.8634	13.5033	14.3163	11.9629
	83	2932.63	2787.46	2784.34	2792.06	2776.25	2788.14	2771.95	2800.39	2852.61	2742.65				83	14.6416	13.7214	14.0337	14.4541	12.6966	13.4362	10.3472	15.1814	14.6093	11.3659
	83.2	2929.8	2784.69	2781.57	2789.2	2773.75	2785.67	2769.82	2797.22	2849.63	2740.53				83.2	13.8593	14.209	13.2567	13.7344	11.2785	11.3821	11.0677	15.9345	14.4795	10.375
	83.4	2926.99	2781.81	2779.07	2786.47	2771.64	2783.54	2767.55	2794.09	2846.88	2738.51				83.4	15.1797	14.0413	11.575	14.9066	11.7278	10.2882	10.9314	15.3831	13.1221	9.38294
	83.6	2923.77	2779.06	2776.87	2783.25	2768.94	2781.5	2765.37	2791.06	2844.37	2736.77				83.6	15.6214	13.9659	11.17	15.5859	14.6185	10.2516	12.4296	15.1614	12.0842	8.30239
	83.8	2920.8	2776.15	2774.5	2780.28	2765.89	2779.43	2762.56	2788.04	2842.05	2735.13				83.8	14.7956	15.2336	12.7885	15.4359	15.445	9.9766	14.3257	14.7304	10.9932	8.31121
	84	2917.79	2772.98	2771.8	2777.02	2762.83	2777.43	2759.73	2785.2	2839.96	2733.44				84	15.3243	16.2511	13.2659	16.4969	15.1838	10.9739	14.474	13.8865	10.1444	8.23561
	84.2	2914.68	2769.66	2769.25	2773.68	2759.85	2774.98	2756.82	2782.51	2837.94	2731.81				84.2	15.6678	17.1626	12.4646	17.5839	14.4899	13.3144	13.7844	12.5629	10.296	8.51692
	84.4	2911.58	2766.17	2766.73	2770.09	2757.11	2772.18	2754.17	2780.15	2835.81	2730				84.4	14.815	17.2398	13.617	16.7629	12.3877	14.085	14.2384	11.653	11.0245	9.47564
	84.6	2908.73	2762.86	2763.81	2767.02	2754.88	2769.32	2751.18	2777.83	2833.55	2728.06				84.6	14.4218	15.5832	14.7848	15.3508	10.6865	15.3663	13.4781	11.0293	11.1154	9.70923
	84.8	2905.77	2759.92	2760.92	2763.95	2752.75	2766.03	2748.78	2775.7	2831.34	2726.16				84.8	14.8447	14.5332	13.7535	14.2643	10.5643	16.7793	12.5358	11.0642	11.6974	9.14897
	85	2902.77	2757.07	2758.25	2761.39	2750.61	2762.69	2746.09	2773.39	2828.89	2724.37				85	15.7663	13.1594	14.007	11.5664	10.9499	16.7698	13.2905	11.2323	12.0815	9.2801
	85.2	2899.5	2754.73	2755.27	2759.26	2748.34	2759.39	2743.5	2771.16	2826.58	2722.42				85.2	15.8523	10.1717	15.3401	10.0149	11.857	15.5661	13.283	12.2295	11.0673	9.98959
	85.4	2896.45	2752.92	2752.22	2757.32	2745.89	2756.46	2740.85	2768.49	2824.45	2720.4				85.4	15.4254	8.61477	14.297	9.35161	12.4989	14.736	11.808	13.3383	10.3504	10.023
	85.6	2893.28	2751.14	2749.54	2755.47	2743.4	2753.52	2738.73	2765.89	2822.4	2718.41				85.6	16.2582	9.57772	13.4956	9.45696	11.9179	13.3487	11.4504	13.1793	10.5423	9.97955
	85.8	2890	2749.07	2746.76	2753.46	2741.09	2751.12	2736.27	2763.21	2820.26	2716.38				85.8	16.1863	10.5403	14.0783	10.8328	11.977	11.8082	11.0102	13.431	10.1606	10.6183
	86	2886.87	2746.91	2743.97	2751.08	2738.59	2748.72	2734.37	2760.58	2818.35	2714.19				86	14.6459	11.6256	13.3145	13.395	12.2802	11.7949	9.50263	12.599	9.28554	10.9324
	86.2	2884.04	2744.35	2741.44	2748.18	2736.2	2746.37	2732.37	2758.25	2816.51	2712.07				86.2	15.2456	14.2282	12.5032	14.3269	12.0983	12.1519	9.94995	10.1299	9.13451	9.92447
	86.4	2880.74	2741.24	2738.88	2745.39	2733.71	2743.81	2730.35	2756.45	2814.69	2710.18				86.4	16.3984	16.4066	13.6497	14.6408	12.8107	13.4205	11.2179	9.20991	9.08938	9.67518
	86.6	2877.57	2737.89	2736.03	2742.34	2731.04	2741.01	2727.95	2754.49	2812.87	2708.16				86.6	15.4779	16.6285	13.7105	15.0742	14.3881	14.5742	11.029	9.96028	9.08285	10.4199
	86.8	2874.5	2734.68	2733.47	2739.47	2728.04	2738.06	2725.94	2752.55	2811.05	2706.08				86.8	15.8295	15.4822	12.2508	13.4592	14.2074	14.4597	10.8289	8.82444	9.19207	9.85626
	87	2871.25	2731.73	2731.09	2737.02	2725.41	2735.32	2723.55	2750.89	2809.17	2704.27				87	16.1289	13.863	11.6112	10.5016	13.07	12.5643	12.2166	8.847	9.77679	8.28302
	87.2	2868.19	2729.11	2728.81	2735.16	2722.78	2733	2721.12	2748.9	2807.13	2702.74				87.2	13.6951	12.6434	11.3822	9.72402	12.7966	11.4372	12.0682	11.1203	10.4896	7.35213
	87.4	2865.78	2726.64	2726.58	2733.02	2720.27	2730.74	2718.76	2746.56	2804.99	2701.28				87.4	11.1918	12.0143	10.2937	10.8401	12.6817	10.3289	11.2511	10.9792	10.8712	7.32689
	87.6	2863.59	2724.26	2724.65	2730.82	2717.68	2728.85	2716.57	2744.53	2802.82	2699.82				87.6	11.2064	12.1072	9.75099	11.6665	12.9393	9.47678	11.4407	10.2652	10.5509	6.76576
	87.8	2861.31	2721.73	2722.57	2728.32	2715.07	2726.87	2714.17	2742.31	2800.77	2698.56				87.8	10.6433	13.3776	11.4168	13.1292	13.7748	9.90525	11.9831	12.5457	10.2951	6.22088
	88	2859.29	2718.89	2720.13	2725.55	2712.18	2724.8	2711.85	2739.54	2798.68	2697.23				88	10.5466	14.9402	12.0162	15.1337	14.324	11.9679	11.0707	14.284	10.4407	7.74396
	88.2	2856.93	2715.82	2717.81	2722.37	2709.36	2722.13	2709.72	2736.69	2796.6	2695.45				88.2	13.4752	15.265	11.5324	15.3881	14.5677	13.0547	10.4961	13.8942	10.456	9.54529
	88.4	2853.86	2712.81	2715.46	2719.48	2706.39	2719.68	2707.61	2733.9	2794.51	2693.53				88.4	17.1582	15.2449	12.3553	14.0839	14.3902	12.214	10.6378	15.3202	10.093	8.81996
	88.6	2850.22	2709.71	2712.85	2716.73	2703.66	2717.19	2705.42	2730.6	2792.5	2691.88				88.6	17.789	15.4679	13.6829	13.1375	13.1013	12.7206	11.5726	16.2499	11.0823	9.09343
	88.8	2846.78	2706.68	2710.08	2714.23	2701.11	2714.57	2702.99	2727.58	2790.06	2689.85				88.8	17.9295	14.6564	12.9196	11.8819	12.4737	13.7398	12.3425	13.6571	12.445	10.3876
	89	2843.01	2703.88	2707.6	2711.91	2698.56	2711.78	2700.51	2725.09	2787.6	2687.82				89	19.125	13.4751	13.9001	11.8065	13.9305	12.9139	12.5537	12.2061	11.8992	9.71411
	89.2	2839.23	2701.27	2704.47	2709.47	2695.54	2709.37	2697.95	2722.62	2785.25	2685.98				89.2	18.506	12.8333	15.9372	12.3211	15.295	12.8644	13.0319	12.5307	12.5313	8.74019
	89.4	2835.65	2698.78	2701.36	2707.01	2692.54	2706.6	2695.3	2720.19	2782.57	2684.27				89.4	16.9711	11.5659	15.1119	12.2912	14.5709	13.8481	13.7111	10.4868	13.7945	9.13161
	89.6	2832.37	2696.68	2698.44	2704.56	2689.71	2703.98	2692.52	2718.43	2779.86	2682.36				89.6	16.7987	9.44496	14.1072	12.0634	14.1242	11.619	13.4973	8.25749	12.6688	8.68528
	89.8	2828.9	2694.92	2695.63	2702.13	2686.9	2701.91	2689.94	2716.75	2777.54	2680.78				89.8	17.351	8.69473	15.092	12.8878	13.9412	10.214	12.3617	8.91465	10.85	8.39952
	90	2825.5	2693.08	2692.46	2699.45	2684.26	2699.79	2687.53	2714.92	2775.46	2678.97				90	16.5569	10.1107	14.8999	12.9038	11.291	10.9842	12.2641	8.13006	10.3584	8.76666
	90.2	2822.33	2690.87	2689.73	2696.99	2682.39	2697.56	2685.04	2713.53	2773.46	2677.3				90.2	14.8289	11.3439	13.463	12.5635	8.45669	10.4726	12.1686	6.64342	8.54113	8.58995
	90.4	2819.56	2688.55	2686.99	2694.38	2680.75	2695.49	2682.71	2712.14	2772.06	2675.54				90.4	13.2981	12.223	14.0199	13.0105	8.08852	11.8856	11.1114	7.51152	6.444	8.42448
	90.6	2816.98	2685.93	2684.2	2691.79	2679.1	2692.67	2680.59	2710.44	2770.81	2673.94				90.6	12.4188	14.3857	13.0936	13.43	8.40504	16.0994	10.1769	9.76936	5.71252	8.21643
	90.8	2814.6	2682.86	2681.84	2689.07	2677.37	2689.22	2678.58	2708.25	2769.69	2672.3				90.8	11.0775	15.5556	10.6203	12.9226	8.68489	16.7726	10.3374	11.3467	6.32955	6.95976
	91	2812.47	2679.86	2679.91	2686.67	2675.59	2686.07	2676.47	2705.88	2768.23	2671.13				91	11.2033	13.7756	8.85581	11.4512	9.66754	15.5029	9.9808	13.5599	7.6901	6.25123
	91.2	2810.06	2677.33	2678.23	2684.45	2673.49	2682.98	2674.6	2702.9	2766.64	2669.74				91.2	12.3981	12.5639	8.13858	10.749	10.885	15.8175	9.36867	14.6179	8.34394	6.87637
	91.4	2807.52	2674.77	2676.63	2682.37	2671.24	2679.91	2672.66	2700.16	2764.85	2668.41				91.4	13.1507	12.7368	7.6489	10.0939	12.2088	12.9389	10.1123	13.6219	9.87879	6.65963
	91.6	2804.79	2672.29	2675.08	2680.44	2668.67	2677.86	2670.57	2697.53	2762.68	2667.11				91.6	14.2484	11.6233	8.82131	8.8645	12.4097	8.80129	10.5045	11.5187	11.7724	5.72807
	91.8	2801.85	2670.11	2673.06	2678.76	2666.33	2676.21	2668.5	2695.62	2760.24	2666.06				91.8	15.0947	10.6213	10.732	8.69023	11.5367	8.36837	9.99505	8.12441	11.7849	6.14815
	92	2798.87	2667.96	2670.83	2676.9	2664	2674.48	2666.55	2694.25	2758.02	2664.64				92	13.6002	11.3395	11.8208	9.59052	12.0302	8.2004	9.83355	5.07372	10.8593	6.62722
	92.2	2796.38	2665.61	2668.37	2674.95	2661.56	2672.93	2664.52	2693.46	2755.88	2663.43				92.2	12.7549	11.3351	12.229	9.84667	11.6962	7.47722	10.7265	4.26221	10.5986	6.46516
	92.4	2793.7	2663.5	2665.96	2672.95	2659.37	2671.37	2662.34	2692.46	2753.85	2661.98				92.4	13.3339	9.88515	12.5603	10.4078	10.2837	9.17207	10.0772	4.92431	8.88373	7.73161
	92.6	2791.14	2661.62	2663.41	2670.78	2657.38	2669.26	2660.51	2691.45	2752.32	2660.31				92.6	11.8773	9.21374	11.6646	11.2467	10.2777	10.9239	9.13661	5.89912	7.07684	9.56474
	92.8	2788.91	2659.79	2661.33	2668.51	2655.27	2667.1	2658.63	2689.99	2750.89	2658.23				92.8	11.1865	8.99858	9.96798	10.7838	10.0686	10.5902	9.39427	9.00085	7.70916	9.8717
	93	2786.57	2658.03	2659.37	2666.44	2653.39	2664.98	2656.81	2687.9	2749.18	2656.37				93	12.4275	8.43402	9.47353	11.0016	8.94632	11.4887	8.45193	11.0899	9.33365	10.1624
	93.2	2783.98	2656.42	2657.52	2664.15	2651.58	2662.53	2655.31	2685.64	2747.18	2654.16				93.2	12.7676	7.6707	9.21259	10.5217	9.97399	11.9833	6.16105	11.6541	10.2645	10.6843
	93.4	2781.51	2654.87	2655.69	2662.26	2649.36	2660.27	2654.23	2683.27	2745.08	2652.14				93.4	12.1041	8.83149	8.71265	9.46828	11.5302	10.7388	6.40483	12.0391	11.0429	10.2898
	93.6	2779.08	2652.85	2653.99	2660.3	2647.04	2658.22	2652.71	2680.89	2742.77	2650.04				93.6	12.6985	10.4733	9.16673	9.53116	11.5595	9.8756	7.09347	11.423	12.0565	10.006
	93.8	2776.44	2650.74	2652.01	2658.41	2644.72	2656.28	2651.42	2678.78	2740.37	2648.12				93.8	12.9903	10.8897	9.74074	10.2756	12.2495	9.96465	6.77428	9.21399	10.9545	10.1263
	94	2773.92	2648.51	2650.09	2656.2	2642.16	2654.29	2649.89	2677.14	2738.43	2646.03				94	12.7092	11.1841	10.2714	10.7301	12.6455	8.73236	8.98893	8.40132	9.07615	9.59782
	94.2	2771.34	2646.26	2647.91	2654.07	2639.76	2652.75	2647.87	2675.38	2736.62	2644.35				94.2	12.9198	11.6654	10.433	11.8703	11.2305	8.36036	10.4663	8.13298	9.50603	7.82871
	94.4	2768.8	2643.9	2645.82	2651.37	2637.71	2650.97	2645.86	2673.88	2734.52	2642.86				94.4	11.9876	11.2269	12.6622	14.653	9.26952	7.5142	8.78299	7.67026	11.8201	6.9414
	94.6	2766.52	2641.8	2642.85	2648.3	2636.01	2649.78	2644.29	2672.25	2731.94	2641.57				94.6	11.8699	10.1317	13.9595	15.3056	8.36461	6.45728	9.07726	8.50251	12.466	5.83278
	94.8	2764.15	2639.79	2640.05	2645.14	2634.39	2648.49	2642.35	2670.46	2729.39	2640.47				94.8	10.3368	11.0032	20.9428	20.1824	7.09144	3.37694	7.13591	10.3936	17.6763	6.3354
	95	2762.66	2637.73	2635.25	2640.94	2633.33	2648.45	2641.62	2668.45	2725.52	2639.21				95	3.38103	5.16678	12.8344	10.936	2.41656	-0.405518	1.33166	5.13953	10.2457	3.20878
