# Supplementary material for: Unstructured regions in IRE1α specify BiP-mediated destabilisation of the luminal domain dimer and repression of the UPR
Source: eLife. 2019 Dec 24;8:e50793. doi: 10.7554/eLife.50793 (PMC6996924; doi:10.7554/eLife.50793)
Supplement: Figure 2—source data 1. [file elife-50793-fig2-data1.xlsx]

## Sheet: rep 1
2019-10-03
TMR signals										A280 signals
IRE1 wt 2076-TMR			IRE1 wt 2076-TMR			IRE1 wt 2076-TMR				IRE1 wt 2076-TMR			IRE1 wt 2076-TMR			IRE1 wt 2076-TMR
run 5			run 9			run 11				run 5			run 9			run 11
0.5 uM			0.5 uM + 100uM MPZN			2 uM				0.5 uM			0.5 uM + 100uM MPZN			2 uM
Time	TMR		Time	TMR		Time	TMR			Time	A280		Time	A280		Time	A280
0	3.1638		0	3.21862		0	3.3444			0.00436667	0.0102296		0.00583333	-0.00156462		0.000833333	0.00104308
0.00720005	3.16255		0.00720005	3.21703		0.00720005	3.34107			0.0110333	0.0118762		0.0125	-0.000357628		0.0075	0.00161678
0.0144001	3.16204		0.0144001	3.21457		0.0144001	3.33716			0.0177	0.0134557		0.0191667	0.000670552		0.0141667	0.00230223
0.0216001	3.16232		0.0216001	3.21158		0.0216001	3.3332			0.0243667	0.0139475		0.0258333	0.0012517		0.0208333	0.00348687
0.0288002	3.16336		0.0288002	3.20839		0.0288002	3.32968			0.0310333	0.0133142		0.0325	0.00113994		0.0275	0.00468642
0.0360002	3.16491		0.0360002	3.20526		0.0360002	3.32693			0.0377	0.0123382		0.0391667	0.000946224		0.0341667	0.00578165
0.0432003	3.16669		0.0432003	3.20238		0.0432003	3.32513			0.0443667	0.0117347		0.0458333	0.000715256		0.0408333	0.00678003
0.0504003	3.16838		0.0504003	3.19993		0.0504003	3.32421			0.0510333	0.0111312		0.0525	0.000298023		0.0475	0.00751764
0.0576004	3.16966		0.0576004	3.19805		0.0576004	3.32407			0.0577	0.0105426		0.0591667	-9.68575e-05		0.0541667	0.00807643
0.0648004	3.17023		0.0648004	3.19678		0.0648004	3.32453			0.0643667	0.0103787		0.0658333	-0.000596046		0.0608333	0.00841171
0.0720005	3.16989		0.0720005	3.19608		0.0720005	3.32544			0.0710333	0.0107959		0.0725	-0.00105798		0.0675	0.00850856
0.0792005	3.16858		0.0792005	3.19586		0.0792005	3.32662			0.0777	0.0110194		0.0791667	-0.00204891		0.0741667	0.00810623
0.0864006	3.16646		0.0864006	3.19602		0.0864006	3.32793			0.0843667	0.0108033		0.0858333	-0.00300258		0.0808333	0.00733882
0.0936006	3.1639		0.0936006	3.19645		0.0936006	3.32924			0.0910333	0.0102893		0.0925	-0.00359863		0.0875	0.00626594
0.100801	3.16129		0.100801	3.19705		0.100801	3.33045			0.0977	0.00977516		0.0991667	-0.00374019		0.0941667	0.00519305
0.108001	3.15899		0.108001	3.19773		0.108001	3.33141			0.104367	0.00951439		0.105833	-0.00343472		0.100833	0.00426173
0.115201	3.15727		0.115201	3.19849		0.115201	3.33194			0.111033	0.00949204		0.1125	-0.00289828		0.1075	0.00358373
0.122401	3.15631		0.122401	3.1994		0.122401	3.33185			0.1177	0.00971556		0.119167	-0.00199676		0.114167	0.00326335
0.129601	3.15617		0.129601	3.20047		0.129601	3.33102			0.124367	0.00944734		0.125833	-0.00113994		0.120833	0.00315905
0.136801	3.15681		0.136801	3.20168		0.136801	3.3294			0.131033	0.00876188		0.1325	-0.000625849		0.1275	0.00329316
0.144001	3.15802		0.144001	3.20302		0.144001	3.32707			0.1377	0.00821054		0.139167	-0.000424683		0.134167	0.00330806
0.151201	3.15962		0.151201	3.20451		0.151201	3.32422			0.144367	0.00805408		0.145833	-0.000320375		0.140833	0.00341237
0.158401	3.16145		0.158401	3.20616		0.158401	3.32117			0.151033	0.0077337		0.1525	-5.21541e-05		0.1475	0.00335276
0.165601	3.16339		0.165601	3.20793		0.165601	3.31832			0.1577	0.0071153		0.159167	0.000283122		0.154167	0.00312924
0.172801	3.16534		0.172801	3.20961		0.172801	3.31608			0.164367	0.00687689		0.165833	0.000245869		0.160833	0.00242144
0.180001	3.16712		0.180001	3.21109		0.180001	3.31478			0.171033	0.00739843		0.1725	7.45058e-06		0.1675	0.00162423
0.187201	3.16857		0.187201	3.21237		0.187201	3.31452			0.1777	0.00816584		0.179167	-0.000678003		0.174167	0.00125915
0.194401	3.16954		0.194401	3.21354		0.194401	3.31523			0.184367	0.00856072		0.185833	-0.0013113		0.180833	0.0013262
0.201601	3.16989		0.201601	3.21462		0.201601	3.31672			0.191033	0.00862032		0.1925	-0.00192225		0.1875	0.00150502
0.208801	3.16954		0.208801	3.21551		0.208801	3.31874			0.1977	0.00857562		0.199167	-0.00229478		0.194167	0.00146031
0.216001	3.16847		0.216001	3.21603		0.216001	3.32103			0.204367	0.00859052		0.205833	-0.00216812		0.200833	0.00186265
0.223201	3.16679		0.223201	3.21608		0.223201	3.32322			0.211033	0.00842661		0.2125	-0.00175834		0.2075	0.00268966
0.230401	3.16484		0.230401	3.21565		0.230401	3.32498			0.2177	0.00798702		0.219167	-0.000804663		0.214167	0.00357628
0.237602	3.16309		0.237602	3.21471		0.237602	3.32612			0.224367	0.00716746		0.225833	-0.000171363		0.220833	0.00394136
0.244802	3.16203		0.244802	3.21316		0.244802	3.32666			0.231033	0.00647455		0.2325	0.000156462		0.2275	0.00426173
0.252002	3.16206		0.252002	3.21092		0.252002	3.3268			0.2377	0.00614673		0.239167	0.000223517		0.234167	0.00461191
0.259202	3.16335		0.259202	3.20814		0.259202	3.32679			0.244367	0.00593066		0.245833	0.000290573		0.240833	0.00457466
0.266402	3.16578		0.266402	3.20514		0.266402	3.32685			0.251033	0.00570714		0.2525	0.000230968		0.2475	0.00405312
0.273602	3.16896		0.273602	3.20231		0.273602	3.32718			0.2577	0.00553578		0.259167	-0.000230968		0.254167	0.00329316
0.280802	3.17239		0.280802	3.19998		0.280802	3.328			0.264367	0.0057146		0.265833	-0.000678003		0.260833	0.00257045
0.288002	3.17544		0.288002	3.19838		0.288002	3.3294			0.271033	0.00598282		0.2725	-0.000871718		0.2675	0.00157952
0.295202	3.17765		0.295202	3.19769		0.295202	3.33142			0.2777	0.00594556		0.279167	-0.000946224		0.274167	0.000648201
0.302402	3.1787		0.302402	3.19799		0.302402	3.33393			0.284367	0.0058338		0.285833	-0.00102818		0.280833	0.000312924
0.309602	3.17849		0.309602	3.19917		0.309602	3.33666			0.291033	0.00558048		0.2925	-0.00103563		0.2875	0.000558794
0.316802	3.17719		0.316802	3.20095		0.316802	3.3393			0.2977	0.00541657		0.299167	-0.00108033		0.294167	0.00102073
0.324002	3.17524		0.324002	3.20298		0.324002	3.34156			0.304367	0.0051111		0.305833	-0.00147521		0.300833	0.00159442
0.331202	3.17321		0.331202	3.20492		0.331202	3.34316			0.311033	0.00479072		0.3125	-0.00245869		0.3075	0.00246614
0.338402	3.17165		0.338402	3.20656		0.338402	3.34395			0.3177	0.0051111		0.319167	-0.00353158		0.314167	0.00345707
0.345602	3.1709		0.345602	3.2078		0.345602	3.34389			0.324367	0.00600517		0.325833	-0.0044778		0.320833	0.00426918
0.352802	3.17104		0.352802	3.20861		0.352802	3.34303			0.331033	0.00732392		0.3325	-0.00508875		0.3275	0.00482053
0.360002	3.17197		0.360002	3.20907		0.360002	3.34148			0.3377	0.0083074		0.339167	-0.00543892		0.334167	0.00516325
0.367202	3.17343		0.367202	3.20933		0.367202	3.33944			0.344367	0.00897795		0.345833	-0.00536442		0.340833	0.00499934
0.374402	3.1751		0.374402	3.20957		0.374402	3.33714			0.351033	0.00956655		0.3525	-0.00426173		0.3475	0.00438094
0.381602	3.1766		0.381602	3.20989		0.381602	3.33481			0.3577	0.00979751		0.359167	-0.00281632		0.354167	0.00374764
0.388802	3.17751		0.388802	3.21028		0.388802	3.33266			0.364367	0.00961125		0.365833	-0.00173599		0.360833	0.00277907
0.396003	3.1775		0.396003	3.21062		0.396003	3.33078			0.371033	0.0089705		0.3725	-0.00157952		0.3675	0.00151992
0.403203	3.17643		0.403203	3.21079		0.403203	3.32924			0.3777	0.00850111		0.379167	-0.0019595		0.374167	0.000178814
0.410403	3.17444		0.410403	3.21063		0.410403	3.32802			0.384367	0.00844151		0.385833	-0.00230223		0.380833	-0.000439584
0.417603	3.17186		0.417603	3.20996		0.417603	3.3271			0.391033	0.00843406		0.3925	-0.00286102		0.3875	-0.000230968
0.424803	3.16912		0.424803	3.20867		0.424803	3.32643			0.3977	0.00801682		0.399167	-0.00333041		0.394167	-1.49012e-05
0.432003	3.16668		0.432003	3.20674		0.432003	3.32598			0.404367	0.00716001		0.405833	-0.00364333		0.400833	0.000268221
0.439203	3.16495		0.439203	3.2043		0.439203	3.32572			0.411033	0.00672787		0.4125	-0.00355393		0.4075	0.000588596
0.446403	3.16427		0.446403	3.20154		0.446403	3.32562			0.4177	0.00664592		0.419167	-0.00306964		0.414167	0.0012666
0.453603	3.16489		0.453603	3.19866		0.453603	3.32564			0.424367	0.00667572		0.425833	-0.00252575		0.420833	0.00205636
0.460803	3.1669		0.460803	3.19577		0.460803	3.32568			0.431033	0.00657141		0.4325	-0.00232458		0.4275	0.00258535
0.468003	3.17016		0.468003	3.19297		0.468003	3.32576			0.4377	0.00674278		0.439167	-0.00258535		0.434167	0.00295788
0.475203	3.17436		0.475203	3.19033		0.475203	3.32595			0.444367	0.00739843		0.445833	-0.00295788		0.440833	0.00351667
0.482403	3.17899		0.482403	3.18785		0.482403	3.32642			0.451033	0.00798702		0.4525	-0.00302494		0.4475	0.00442564
0.489603	3.18352		0.489603	3.18546		0.489603	3.32735			0.4577	0.00855327		0.459167	-0.00303239		0.454167	0.00513345
0.496803	3.18747		0.496803	3.18311		0.496803	3.3288			0.464367	0.00903755		0.465833	-0.00327826		0.460833	0.00493228
0.504003	3.1905		0.504003	3.18073		0.504003	3.33077			0.471033	0.00956655		0.4725	-0.00377744		0.4675	0.00403821
0.511203	3.19244		0.511203	3.17847		0.511203	3.3332			0.4777	0.00989437		0.479167	-0.00421703		0.474167	0.00344217
0.518403	3.19326		0.518403	3.17659		0.518403	3.33599			0.484367	0.00988692		0.485833	-0.00451505		0.480833	0.00303984
0.525603	3.19302		0.525603	3.17539		0.525603	3.33893			0.491033	0.0096336		0.4925	-0.00506639		0.4875	0.00245124
0.532803	3.19188		0.532803	3.17517		0.532803	3.34162			0.4977	0.00909716		0.499167	-0.0057444		0.494167	0.00182539
0.540003	3.19008		0.540003	3.17616		0.540003	3.34358			0.504367	0.00829995		0.505833	-0.00616163		0.500833	0.00202656
0.547203	3.18784		0.547204	3.17852		0.547204	3.34449			0.511033	0.00783056		0.5125	-0.00604242		0.5075	0.00281632
0.554404	3.18539		0.554404	3.18231		0.554404	3.34425			0.5177	0.00791252		0.519167	-0.00575185		0.514167	0.00309199
0.561604	3.18288		0.561604	3.18736		0.561604	3.34306			0.524367	0.00838935		0.525833	-0.00538677		0.520833	0.00277162
0.568804	3.18032		0.568804	3.19331		0.568804	3.34121			0.531033	0.00871718		0.5325	-0.00480562		0.5275	0.00234693
0.576004	3.17768		0.576004	3.19961		0.576004	3.33905			0.5377	0.00877678		0.539167	-0.00401586		0.534167	0.00177324
0.583204	3.17495		0.583204	3.20564		0.583204	3.33691			0.544367	0.00903755		0.545833	-0.00360608		0.540833	0.000983477
0.590404	3.17216		0.590404	3.21092		0.590404	3.33515			0.551033	0.0090301		0.5525	-0.00366569		0.5475	0.00026077
0.597604	3.16937		0.597604	3.2151		0.597604	3.33405			0.5577	0.00822544		0.559167	-0.00398606		0.554167	8.9407e-05
0.604804	3.16666		0.604804	3.21801		0.604804	3.33374			0.564367	0.00686198		0.565833	-0.00403076		0.560833	6.70552e-05
0.612004	3.16406		0.612004	3.21963		0.612004	3.33412			0.571033	0.00565499		0.5725	-0.00385195		0.5675	0.000178814
0.619204	3.16162		0.619204	3.22005		0.619204	3.33493			0.5777	0.00536442		0.579167	-0.00365078		0.574167	0.000506639
0.626404	3.15944		0.626404	3.21949		0.626404	3.33596			0.584367	0.00549853		0.585833	-0.00339001		0.580833	0.000827014
0.633604	3.15765		0.633604	3.21823		0.633604	3.3371			0.591033	0.00612438		0.5925	-0.0032112		0.5875	0.000536442
0.640804	3.15635		0.640804	3.21665		0.640804	3.33834			0.5977	0.00733882		0.599167	-0.00313669		0.594167	-0.000238419
0.648004	3.15558		0.648004	3.21502		0.648004	3.3397			0.604367	0.00869483		0.605833	-0.00368059		0.600833	-0.000737607
0.655204	3.15539		0.655204	3.21352		0.655204	3.34108			0.611033	0.0096038		0.6125	-0.00461936		0.6075	-0.000983477
0.662404	3.1558		0.662404	3.21225		0.662404	3.34235			0.6177	0.00927597		0.619167	-0.00556558		0.614167	-0.00112504
0.669604	3.15683		0.669604	3.21116		0.669604	3.34336			0.624367	0.00824779		0.625833	-0.00619888		0.620833	-0.00113994
0.676804	3.1585		0.676804	3.2102		0.676804	3.34401			0.631033	0.007011		0.6325	-0.00623614		0.6275	-0.000298023
0.684004	3.16077		0.684004	3.20928		0.684004	3.34412			0.6377	0.00628829		0.639167	-0.00602007		0.634167	0.0012964
0.691204	3.1636		0.691204	3.20827		0.691204	3.34352			0.644367	0.00593066		0.645833	-0.00566989		0.640833	0.00306219
0.698404	3.16687		0.698404	3.20712		0.698404	3.342			0.651033	0.00566244		0.6525	-0.00561029		0.6475	0.00450015
0.705605	3.17039		0.705605	3.20581		0.705605	3.33948			0.6577	0.00542402		0.659167	-0.0057593		0.654167	0.00563264
0.712805	3.17391		0.712805	3.20445		0.712805	3.33611			0.664367	0.00542402		0.665833	-0.00575185		0.660833	0.00631064
0.720005	3.17713		0.720005	3.20327		0.720005	3.3322			0.671033	0.00582635		0.6725	-0.00587106		0.6675	0.0064224
0.727205	3.17985		0.727205	3.2026		0.727205	3.32809			0.6777	0.00617653		0.679167	-0.00599772		0.674167	0.00615418
0.734405	3.18189		0.734405	3.20272		0.734405	3.32409			0.684367	0.00662357		0.685833	-0.00604987		0.680833	0.00579655
0.741605	3.18313		0.741605	3.20379		0.741605	3.32045			0.691033	0.00721961		0.6925	-0.00535697		0.6875	0.00522286
0.748805	3.1835		0.748805	3.2057		0.748805	3.31737			0.6977	0.00794232		0.699167	-0.00426918		0.694167	0.00438094
0.756005	3.18303		0.756005	3.20817		0.756005	3.31501			0.704367	0.00824779		0.705833	-0.00347197		0.700833	0.00360608
0.763205	3.18201		0.763205	3.21071		0.763205	3.31337			0.711033	0.00777841		0.7125	-0.00334531		0.7075	0.0032112
0.770405	3.18077		0.770405	3.2128		0.770405	3.31225			0.7177	0.00686198		0.719167	-0.00366569		0.714167	0.00323355
0.777605	3.17963		0.777605	3.21395		0.777605	3.31136			0.724367	0.00590831		0.725833	-0.00429153		0.720833	0.0031963
0.784805	3.1788		0.784805	3.21379		0.784805	3.31044			0.731033	0.00540167		0.7325	-0.00505894		0.7275	0.00318885
0.792005	3.17837		0.792005	3.21221		0.792005	3.30938			0.7377	0.00523776		0.739167	-0.00572205		0.734167	0.00298023
0.799205	3.17842		0.799205	3.2094		0.799205	3.30827			0.744367	0.00548363		0.745833	-0.00614673		0.740833	0.00252575
0.806405	3.17896		0.806405	3.20581		0.806405	3.30724			0.751033	0.00607967		0.7525	-0.00621378		0.7475	0.00199676
0.813605	3.17984		0.813605	3.20203		0.813605	3.30653			0.7577	0.00678003		0.759167	-0.00610948		0.754167	0.00146776
0.820805	3.18084		0.820805	3.19867		0.820805	3.30642			0.764367	0.00724196		0.765833	-0.0057444		0.760833	0.00100583
0.828005	3.18164		0.828005	3.19624		0.828005	3.30721			0.771033	0.00727177		0.7725	-0.0057295		0.7675	0.000663102
0.835205	3.18202		0.835205	3.19508		0.835205	3.30907			0.7777	0.00740588		0.779167	-0.00632554		0.774167	0.000856817
0.842405	3.18183		0.842405	3.19526		0.842405	3.31199			0.784367	0.0077486		0.785833	-0.00731647		0.780833	0.00148267
0.849605	3.18105		0.849605	3.19653		0.849605	3.31571			0.791033	0.00847876		0.7925	-0.00766665		0.7875	0.00204146
0.856805	3.17974		0.856805	3.19844		0.856805	3.31978			0.7977	0.0090152		0.799167	-0.00717491		0.794167	0.00239164
0.864006	3.17796		0.864006	3.20051		0.864006	3.32376			0.804367	0.00915676		0.805833	-0.00632554		0.800833	0.00294298
0.871206	3.17574		0.871206	3.20227		0.871206	3.32723			0.811033	0.00882149		0.8125	-0.00526011		0.8075	0.00343472
0.878406	3.17312		0.878406	3.20339		0.878406	3.32991			0.8177	0.00832975		0.819167	-0.0038147		0.814167	0.00346452
0.885606	3.17022		0.885606	3.2037		0.885606	3.33167			0.824367	0.00820309		0.825833	-0.00225008		0.820833	0.00303239
0.892806	3.16728		0.892806	3.20318		0.892806	3.33257			0.831033	0.00818074		0.8325	-0.00179559		0.8275	0.0025034
0.900006	3.16454		0.900006	3.20203		0.900006	3.33287			0.8377	0.00848621		0.839167	-0.00239909		0.834167	0.0019297
0.907206	3.16222		0.907206	3.20057		0.907206	3.33295			0.844367	0.0089407		0.845833	-0.00356138		0.840833	0.00119209
0.914406	3.16044		0.914406	3.19917		0.914406	3.33313			0.851033	0.00949204		0.8525	-0.00474602		0.8475	0.000588596
0.921606	3.15936		0.921606	3.19814		0.921606	3.33355			0.8577	0.00984222		0.859167	-0.00616163		0.854167	0.00038743
0.928806	3.15913		0.928806	3.19759		0.928806	3.33421			0.864367	0.00981987		0.865833	-0.00738353		0.860833	0.000581145
0.936006	3.15987		0.936006	3.1975		0.936006	3.33498			0.871033	0.00999868		0.8725	-0.00760704		0.8675	0.000782311
0.943206	3.16156		0.943206	3.19769		0.943206	3.33566			0.8777	0.0102744		0.879167	-0.0069961		0.874167	0.000908971
0.950406	3.16392		0.950406	3.19794		0.950406	3.33604			0.884367	0.0106022		0.885833	-0.00607222		0.880833	0.000827014
0.957606	3.16665		0.957606	3.198		0.957606	3.33594			0.891033	0.0109151		0.8925	-0.00520051		0.8875	0.000715256
0.964806	3.16941		0.964806	3.19768		0.964806	3.33526			0.8977	0.011079		0.899167	-0.00438094		0.894167	0.000543892
0.972006	3.17199		0.972006	3.19688		0.972006	3.334			0.904367	0.0109151		0.905833	-0.00397116		0.900833	0.000290573
0.979206	3.1742		0.979206	3.19566		0.979206	3.33231			0.911033	0.00983477		0.9125	-0.00435859		0.9075	6.70552e-05
0.986406	3.17599		0.986406	3.19422		0.986406	3.33042			0.9177	0.008367		0.919167	-0.00532717		0.914167	-0.000685453
0.993606	3.17734		0.993606	3.19281		0.993606	3.32862			0.924367	0.00750273		0.925833	-0.00610203		0.920833	-0.00174344
1.00081	3.17836		1.00081	3.19169		1.00081	3.32711			0.931033	0.00730902		0.9325	-0.00631809		0.9275	-0.00248849
1.00801	3.17916		1.00801	3.19108		1.00801	3.32609			0.9377	0.00754744		0.939167	-0.00604242		0.934167	-0.00243634
1.01521	3.17976		1.01521	3.19111		1.01521	3.32562			0.944367	0.00790507		0.945833	-0.00552088		0.940833	-0.00196695
1.02241	3.18019		1.02241	3.19192		1.02241	3.32571			0.951033	0.00851601		0.9525	-0.00457466		0.9475	-0.00174344
1.02961	3.18046		1.02961	3.19349		1.02961	3.32628			0.9577	0.0089258		0.959167	-0.00344962		0.954167	-0.00116229
1.03681	3.18055		1.03681	3.19568		1.03681	3.32721			0.964367	0.00873208		0.965833	-0.00279397		0.960833	-2.98023e-05
1.04401	3.18045		1.04401	3.19818		1.04401	3.32826			0.971033	0.00870973		0.9725	-0.00321865		0.9675	0.00109524
1.05121	3.18012		1.05121	3.20067		1.05121	3.32919			0.9777	0.00930578		0.979167	-0.00434369		0.974167	0.00174344
1.05841	3.17953		1.05841	3.20294		1.05841	3.3298			0.984367	0.0102818		0.985833	-0.00541657		0.980833	0.00201166
1.06561	3.17879		1.06561	3.20486		1.06561	3.33			0.991033	0.0109971		0.9925	-0.00635535		0.9875	0.00247359
1.07281	3.17805		1.07281	3.20634		1.07281	3.32972			0.9977	0.0115186		0.999167	-0.00689179		0.994167	0.00269711
1.08001	3.17751		1.08001	3.20728		1.08001	3.32896			1.00437	0.012137		1.00583	-0.00713021		1.00083	0.00239164
1.08721	3.1772		1.08721	3.20769		1.08721	3.3277			1.01103	0.0130162		1.0125	-0.00669807		1.0075	0.00198931
1.09441	3.17706		1.09441	3.2077		1.09441	3.32601			1.0177	0.0140369		1.01917	-0.00591576		1.01417	0.00157207
1.10161	3.17694		1.10161	3.20759		1.10161	3.32407			1.02437	0.014998		1.02583	-0.00544637		1.02083	0.00133365
1.10881	3.17671		1.10881	3.20761		1.10881	3.32211			1.03103	0.0156388		1.0325	-0.00561774		1.0275	0.00110269
1.11601	3.17633		1.11601	3.20779		1.11601	3.32042			1.0377	0.0159591		1.03917	-0.00659376		1.03417	0.00137836
1.12321	3.17581		1.12321	3.208		1.12321	3.31925			1.04437	0.015907		1.04583	-0.00769645		1.04083	0.00210851
1.13041	3.17523		1.13041	3.20804		1.13041	3.31877			1.05103	0.0153929		1.0525	-0.00864267		1.0475	0.00243634
1.13761	3.17482		1.13761	3.20784		1.13761	3.3191			1.0577	0.014253		1.05917	-0.00929832		1.05417	0.00207126
1.14481	3.17487		1.14481	3.20739		1.14481	3.32029			1.06437	0.0129938		1.06583	-0.0096485		1.06083	0.0013411
1.15201	3.17569		1.15201	3.20667		1.15201	3.32232			1.07103	0.0122637		1.0725	-0.00967085		1.0675	0.000663102
1.15921	3.17752		1.15921	3.20567		1.15921	3.32505			1.0777	0.0120848		1.07917	-0.00931323		1.07417	0.000238419
1.16641	3.18031		1.16641	3.20454		1.16641	3.32822			1.08437	0.011988		1.08583	-0.00869483		1.08083	4.47035e-05
1.17361	3.18384		1.17361	3.20353		1.17361	3.33156			1.09103	0.0115037		1.0925	-0.00784546		1.0875	0.000119209
1.18081	3.18768		1.18081	3.20294		1.18081	3.33486			1.0977	0.0112727		1.09917	-0.00709295		1.09417	0.000633299
1.18801	3.19131		1.18801	3.20287		1.18801	3.33791			1.10437	0.0112876		1.10583	-0.0064224		1.10083	0.00115484
1.19521	3.19414		1.19521	3.20321		1.19521	3.34054			1.11103	0.0111535		1.1125	-0.00603497		1.1075	0.00190735
1.20241	3.19555		1.20241	3.20374		1.20241	3.34257			1.1177	0.0107065		1.11917	-0.00607967		1.11417	0.00236183
1.20961	3.1952		1.20961	3.20436		1.20961	3.34388			1.12437	0.0103787		1.12583	-0.00624359		1.12083	0.00221282
1.21681	3.19301		1.21681	3.20505		1.21681	3.34443			1.13103	0.010483		1.1325	-0.00648946		1.1275	0.00172108
1.22401	3.18924		1.22401	3.20581		1.22401	3.34429			1.1377	0.0104383		1.13917	-0.00670552		1.13417	0.00138581
1.23121	3.1843		1.23121	3.20656		1.23121	3.34349			1.14437	0.00983477		1.14583	-0.00704825		1.14083	0.00148267
1.23841	3.17865		1.23841	3.20728		1.23841	3.34213			1.15103	0.00922382		1.1525	-0.00709295		1.1475	0.00151247
1.24561	3.17279		1.24561	3.20809		1.24561	3.34032			1.1577	0.00893325		1.15917	-0.00644475		1.15417	0.00118464
1.25281	3.16727		1.25281	3.20916		1.25281	3.33831			1.16437	0.00920147		1.16583	-0.00600517		1.16083	0.00114739
1.26001	3.16262		1.26001	3.21056		1.26001	3.33645			1.17103	0.00978261		1.1725	-0.00624359		1.1675	0.00155717
1.26721	3.15921		1.26721	3.21214		1.26721	3.33506			1.1777	0.010401		1.17917	-0.00669062		1.17417	0.00208616
1.27441	3.15713		1.27441	3.21351		1.27441	3.33432			1.18437	0.0113025		1.18583	-0.00683963		1.18083	0.00235438
1.28161	3.15629		1.28161	3.21431		1.28161	3.33429			1.19103	0.0122115		1.1925	-0.00672787		1.1875	0.0025034
1.28881	3.15652		1.28881	3.21438		1.28881	3.33492			1.1977	0.0131503		1.19917	-0.00697374		1.19417	0.00306219
1.29601	3.15766		1.29601	3.21371		1.29601	3.33604			1.20437	0.0133142		1.20583	-0.00736117		1.20083	0.00355393
1.30321	3.1594		1.30321	3.2124		1.30321	3.33737			1.21103	0.0128224		1.2125	-0.00791252		1.2075	0.00333041
1.31041	3.16139		1.31041	3.21051		1.31041	3.33849			1.2177	0.0121072		1.21917	-0.00856072		1.21417	0.00227988
1.31761	3.16324		1.31761	3.20819		1.31761	3.33896			1.22437	0.0111833		1.22583	-0.00911206		1.22083	0.00113249
1.32481	3.16467		1.32481	3.20574		1.32481	3.33851			1.23103	0.010334		1.2325	-0.00940263		1.2275	0.000335276
1.33201	3.1656		1.33201	3.20355		1.33201	3.33705			1.2377	0.00941753		1.23917	-0.00946969		1.23417	-0.000111759
1.33921	3.16607		1.33921	3.20199		1.33921	3.33466			1.24437	0.0089407		1.24583	-0.00981987		1.24083	-0.000186265
1.34641	3.16622		1.34641	3.20119		1.34641	3.33156			1.25103	0.00847876		1.2525	-0.01017		1.2475	6.70552e-05
1.35361	3.16628		1.35361	3.20106		1.35361	3.32802			1.2577	0.00777841		1.25917	-0.0105202		1.25417	0.000506639
1.36081	3.16648		1.36081	3.20143		1.36081	3.32443			1.26437	0.00703335		1.26583	-0.0106171		1.26083	0.000968575
1.36801	3.16713		1.36801	3.20207		1.36801	3.32122			1.27103	0.00617653		1.2725	-0.0105277		1.2675	0.00105053
1.37521	3.16842		1.37521	3.20284		1.37521	3.31879			1.2777	0.00540167		1.27917	-0.010334		1.27417	0.000603497
1.38241	3.17037		1.38241	3.20359		1.38241	3.31734			1.28437	0.00467896		1.28583	-0.00984967		1.28083	-0.000201166
1.38961	3.17283		1.38961	3.20423		1.38961	3.31689			1.29103	0.00433624		1.2925	-0.00927597		1.2875	-0.000655651
1.39681	3.17555		1.39681	3.20467		1.39681	3.31733			1.2977	0.00472367		1.29917	-0.00886619		1.29417	-0.000424683
1.40401	3.1782		1.40401	3.20491		1.40401	3.31852			1.30437	0.00572205		1.30583	-0.00897795		1.30083	-0.00012666
1.41121	3.18046		1.41121	3.20505		1.41121	3.32032			1.31103	0.00727177		1.3125	-0.00968575		1.3075	9.68575e-05
1.41841	3.18204		1.41841	3.20523		1.41841	3.32248			1.3177	0.00876933		1.31917	-0.0104681		1.31417	0.000469387
1.42561	3.18275		1.42561	3.20559		1.42561	3.32468			1.32437	0.0102296		1.32583	-0.0110045		1.32083	0.00101328
1.43281	3.18257		1.43281	3.20617		1.43281	3.32658			1.33103	0.0118688		1.3325	-0.0111908		1.3275	0.00133365
1.44001	3.18165		1.44001	3.20693		1.44001	3.32801			1.3377	0.0132248		1.33917	-0.0109896		1.33417	0.00111014
1.44721	3.18029		1.44721	3.20779		1.44721	3.32893			1.34437	0.0137165		1.34583	-0.0105426		1.34083	0.00077486
1.45441	3.17883		1.45441	3.20873		1.45441	3.32925			1.35103	0.0130534		1.3525	-0.0101179		1.3475	0.000372529
1.46161	3.17761		1.46161	3.20972		1.46161	3.32878			1.3577	0.012368		1.35917	-0.0100732		1.35417	-0.000141561
1.46881	3.17693		1.46881	3.21075		1.46881	3.32739			1.36437	0.0121519		1.36583	-0.0103638		1.36083	-0.000357628
1.47601	3.17697		1.47601	3.21177		1.47601	3.32514			1.37103	0.0120997		1.3725	-0.0106767		1.3675	-0.000149012
1.48321	3.17782		1.48321	3.21275		1.48321	3.32229			1.3777	0.0116229		1.37917	-0.0109524		1.37417	0.00037998
1.49041	3.17937		1.49041	3.21367		1.49041	3.31916			1.38437	0.0109002		1.38583	-0.01131		1.38083	0.000670552
1.49761	3.18142		1.49761	3.21456		1.49761	3.31601			1.39103	0.0105202		1.3925	-0.0115409		1.3875	0.00106543
1.50481	3.18369		1.50481	3.21534		1.50481	3.31302			1.3977	0.0103861		1.39917	-0.0113621		1.39417	0.00169873
1.51201	3.18591		1.51201	3.21592		1.51201	3.31036			1.40437	0.0101402		1.40583	-0.0106469		1.40083	0.00221282
1.51921	3.18785		1.51921	3.21618		1.51921	3.30818			1.41103	0.00970811		1.4125	-0.0096038		1.4075	0.00245869
1.52641	3.18931		1.52641	3.21607		1.52641	3.3066			1.4177	0.00929832		1.41917	-0.00873208		1.41417	0.0026077
1.53361	3.19012		1.53361	3.21563		1.53361	3.30563			1.42437	0.0089407		1.42583	-0.00782311		1.42083	0.0031665
1.54081	3.19017		1.54081	3.21492		1.54081	3.30509			1.43103	0.00855327		1.4325	-0.00688434		1.4275	0.00362843
1.54801	3.18947		1.54801	3.21398		1.54801	3.30483			1.4377	0.00812113		1.43917	-0.00600517		1.43417	0.00336021
1.55521	3.18811		1.55521	3.21283		1.55521	3.30474			1.44437	0.0076592		1.44583	-0.00556558		1.44083	0.00277162
1.56241	3.18623		1.56241	3.2115		1.56241	3.30485			1.45103	0.00758469		1.4525	-0.00564009		1.4475	0.0025332
1.56961	3.184		1.56961	3.2101		1.56961	3.30523			1.4577	0.00787526		1.45917	-0.00587851		1.45417	0.0025183
1.57681	3.18159		1.57681	3.20882		1.57681	3.306			1.46437	0.00876933		1.46583	-0.00642985		1.46083	0.00235438
1.58401	3.17915		1.58401	3.20787		1.58401	3.30717			1.47103	0.0100657		1.4725	-0.00715256		1.4675	0.00230223
1.59121	3.17684		1.59121	3.20737		1.59121	3.30871			1.4777	0.0115559		1.47917	-0.00791997		1.47417	0.00314415
1.59841	3.17476		1.59841	3.2074		1.59841	3.31059			1.48437	0.0129119		1.48583	-0.00875443		1.48083	0.00432134
1.60561	3.17298		1.60561	3.20791		1.60561	3.31274			1.49103	0.0136271		1.4925	-0.0095889		1.4875	0.00471622
1.61281	3.17156		1.61281	3.20886		1.61281	3.3151			1.4977	0.0140592		1.49917	-0.0101179		1.49417	0.00399351
1.62001	3.17051		1.62001	3.21013		1.62001	3.31743			1.50437	0.0146851		1.50583	-0.0102445		1.50083	0.00278652
1.62721	3.1698		1.62721	3.21148		1.62721	3.31939			1.51103	0.0151694		1.5125	-0.0103563		1.5075	0.00162423
1.63441	3.16936		1.63441	3.21256		1.63441	3.32072			1.5177	0.0147521		1.51917	-0.0108257		1.51417	0.000394881
1.64161	3.16917		1.64161	3.21304		1.64161	3.32134			1.52437	0.0136271		1.52583	-0.0110641		1.52083	-0.00090152
1.64881	3.1692		1.64881	3.2127		1.64881	3.32128			1.53103	0.0124499		1.5325	-0.0106469		1.5275	-0.00205636
1.65601	3.16941		1.65601	3.21156		1.65601	3.32067			1.5377	0.0117868		1.53917	-0.00987947		1.53417	-0.00272691
1.66321	3.16966		1.66321	3.20985		1.66321	3.31957			1.54437	0.0111908		1.54583	-0.00924617		1.54083	-0.00286847
1.67041	3.16972		1.67041	3.20789		1.67041	3.3181			1.55103	0.0109076		1.5525	-0.00909716		1.5475	-0.00270456
1.67761	3.16933		1.67761	3.20606		1.67761	3.31647			1.5577	0.01131		1.55917	-0.00908226		1.55417	-0.00244379
1.68481	3.16836		1.68481	3.20467		1.68481	3.31507			1.56437	0.0119433		1.56583	-0.0089556		1.56083	-0.00249594
1.69201	3.16684		1.69201	3.20397		1.69201	3.31426			1.57103	0.012219		1.5725	-0.00899285		1.5675	-0.00236928
1.69921	3.16486		1.69921	3.20405		1.69921	3.31427			1.5777	0.0118613		1.57917	-0.00951439		1.57417	-0.00200421
1.70641	3.16271		1.70641	3.20492		1.70641	3.3152			1.58437	0.0112504		1.58583	-0.0102893		1.58083	-0.0013411
1.71361	3.16067		1.71361	3.20638		1.71361	3.31699			1.59103	0.0108704		1.5925	-0.0107586		1.5875	-0.000968575
1.72081	3.15909		1.72081	3.20808		1.72081	3.31949			1.5977	0.0107363		1.59917	-0.0108182		1.59417	-0.000834465
1.72801	3.15818		1.72801	3.20956		1.72801	3.32243			1.60437	0.0108257		1.60583	-0.0105947		1.60083	-0.000581145
1.73521	3.158		1.73521	3.21038		1.73521	3.32538			1.61103	0.011526		1.6125	-0.0102744		1.6075	-0.000208616
1.74241	3.15846		1.74241	3.21025		1.74241	3.32784			1.6177	0.0129268		1.61917	-0.00999868		1.61417	0.000424683
1.74961	3.15933		1.74961	3.20916		1.74961	3.32941			1.62437	0.0143647		1.62583	-0.0100061		1.62083	0.000797212
1.75681	3.16026		1.75681	3.20722		1.75681	3.32994			1.63103	0.0151172		1.6325	-0.00988692		1.6275	0.00106543
1.76401	3.16084		1.76401	3.20465		1.76401	3.3295			1.6377	0.0148118		1.63917	-0.009574		1.63417	0.00107288
1.77121	3.16078		1.77121	3.20166		1.77121	3.32831			1.64437	0.0141561		1.64583	-0.00935048		1.64083	0.000886619
1.77841	3.15997		1.77841	3.19848		1.77841	3.32667			1.65103	0.0130609		1.6525	-0.00943989		1.6475	0.000461936
1.78561	3.15856		1.78561	3.19541		1.78561	3.32496			1.6577	0.0116751		1.65917	-0.00958145		1.65417	-7.45058e-05
1.79281	3.1568		1.79281	3.19272		1.79281	3.32353			1.66437	0.0106245		1.66583	-0.00948459		1.66083	-0.000536442
1.80001	3.15493		1.80001	3.19055		1.80001	3.32268			1.67103	0.0103414		1.6725	-0.00959635		1.6675	-0.000886619
1.80721	3.15313		1.80721	3.18888		1.80721	3.32252			1.6777	0.0109002		1.67917	-0.0100061		1.67417	-0.00130385
1.81441	3.15161		1.81441	3.1876		1.81441	3.32298			1.68437	0.0114813		1.68583	-0.0108033		1.68083	-0.00164658
1.82161	3.1506		1.82161	3.18658		1.82161	3.32383			1.69103	0.0120625		1.6925	-0.0116676		1.6875	-0.00157952
1.82881	3.15039		1.82881	3.18576		1.82881	3.32486			1.6977	0.0124127		1.69917	-0.0123307		1.69417	-0.00111759
1.83601	3.15113		1.83601	3.18519		1.83601	3.32591			1.70437	0.0125319		1.70583	-0.0126287		1.70083	-0.000439584
1.84321	3.15289		1.84321	3.18494		1.84321	3.32684			1.71103	0.0121519		1.7125	-0.0126213		1.7075	8.19564e-05
1.85041	3.15565		1.85041	3.18508		1.85041	3.32751			1.7177	0.0115484		1.71917	-0.0123158		1.71417	0.000707805
1.85761	3.1593		1.85761	3.18565		1.85761	3.3278			1.72437	0.0114217		1.72583	-0.0114366		1.72083	0.00149012
1.86481	3.1636		1.86481	3.18662		1.86481	3.32763			1.73103	0.011526		1.7325	-0.0100881		1.7275	0.00233203
1.87201	3.16817		1.87201	3.18788		1.87201	3.32701			1.7377	0.0117645		1.73917	-0.00851601		1.73417	0.00275671
1.87921	3.17247		1.87921	3.18927		1.87921	3.32598			1.74437	0.0119135		1.74583	-0.00738353		1.74083	0.00291318
1.88641	3.17599		1.88641	3.19069		1.88641	3.32459			1.75103	0.0121593		1.7525	-0.00650436		1.7475	0.00297278
1.89361	3.17837		1.89361	3.19207		1.89361	3.32285			1.7577	0.012286		1.75917	-0.00625104		1.75417	0.00302494
1.90081	3.17945		1.90081	3.19336		1.90081	3.32083			1.76437	0.0119582		1.76583	-0.00665337		1.76083	0.00293553
1.90801	3.17929		1.90801	3.19456		1.90801	3.31865			1.77103	0.0116006		1.7725	-0.0077188		1.7675	0.0026226
1.91521	3.17818		1.91521	3.19567		1.91521	3.31653			1.7777	0.0113472		1.77917	-0.00955164		1.77417	0.00213832
1.92241	3.17655		1.92241	3.19683		1.92241	3.31466			1.78437	0.0110716		1.78583	-0.0114068		1.78083	0.00164658
1.92961	3.17491		1.92961	3.19816		1.92961	3.31319			1.79103	0.0106767		1.7925	-0.0132769		1.7875	0.0012964
1.93681	3.17371		1.93681	3.19974		1.93681	3.31216			1.7977	0.0107214		1.79917	-0.014253		1.79417	0.00120699
1.94401	3.17315		1.94401	3.20144		1.94401	3.31163			1.80437	0.0115857		1.80583	-0.0146255		1.80083	0.0012368
1.95121	3.17318		1.95121	3.20305		1.95121	3.31162			1.81103	0.0129268		1.8125	-0.0143349		1.8075	0.00118464
1.95841	3.17361		1.95841	3.20435		1.95841	3.31209			1.8177	0.0141039		1.81917	-0.0135601		1.81417	0.00110269
1.96561	3.17423		1.96561	3.20534		1.96561	3.31302			1.82437	0.0146851		1.82583	-0.0128075		1.82083	0.000536442
1.97281	3.17489		1.97281	3.20608		1.97281	3.31431			1.83103	0.0149086		1.8325	-0.0118688		1.8275	-0.000193715
1.98001	3.17538		1.98001	3.20665		1.98001	3.31582			1.8377	0.0148416		1.83917	-0.0112355		1.83417	-0.000648201
1.98721	3.17562		1.98721	3.20705		1.98721	3.31744			1.84437	0.0143871		1.84583	-0.0108182		1.84083	-0.000305474
1.99441	3.17557		1.99441	3.20721		1.99441	3.31904			1.85103	0.0132993		1.8525	-0.0112504		1.8475	0.000394881
2.00161	3.17538		2.00161	3.20711		2.00161	3.32055			1.8577	0.0120923		1.85917	-0.0119209		1.85417	0.00110269
2.00881	3.17525		2.00881	3.20671		2.00881	3.32196			1.86437	0.0113249		1.86583	-0.0119433		1.86083	0.00207871
2.01601	3.17529		2.01601	3.20603		2.01601	3.32329			1.87103	0.0106767		1.8725	-0.0116974		1.8675	0.0031963
2.02321	3.1755		2.02321	3.20505		2.02321	3.32458			1.8777	0.00987202		1.87917	-0.0118017		1.87417	0.00393391
2.03041	3.17585		2.03041	3.20381		2.03041	3.32587			1.88437	0.0089407		1.88583	-0.0123456		1.88083	0.00357628
2.03761	3.17626		2.03761	3.20237		2.03761	3.32714			1.89103	0.00859797		1.8925	-0.0122041		1.8875	0.00257045
2.04481	3.17666		2.04481	3.20096		2.04481	3.32837			1.8977	0.00865757		1.89917	-0.0113994		1.89417	0.00151992
2.05201	3.17692		2.05201	3.19986		2.05201	3.32952			1.90437	0.00899285		1.90583	-0.010781		1.90083	0.00077486
2.05921	3.17686		2.05921	3.19935		2.05921	3.33057			1.91103	0.0096038		1.9125	-0.0108182		1.9075	0.000491738
2.06641	3.17642		2.06641	3.19961		2.06641	3.33138			1.9177	0.010334		1.91917	-0.0114441		1.91417	0.000394881
2.07361	3.1757		2.07361	3.20064		2.07361	3.33186			1.92437	0.0109076		1.92583	-0.0123456		1.92083	0.000439584
2.08081	3.17486		2.08081	3.2023		2.08081	3.33191			1.93103	0.0108927		1.9325	-0.013195		1.9275	0.000528991
2.08801	3.17406		2.08801	3.20432		2.08801	3.33155			1.9377	0.010483		1.93917	-0.0132918		1.93417	0.000536442
2.09521	3.17336		2.09521	3.20635		2.09521	3.33084			1.94437	0.0100657		1.94583	-0.0129938		1.94083	0.000528991
2.10241	3.17275		2.10241	3.2081		2.10241	3.32979			1.95103	0.00999868		1.9525	-0.0124723		1.9475	0.000447035
2.10961	3.17228		2.10961	3.20926		2.10961	3.32841			1.9577	0.0101551		1.95917	-0.0115708		1.95417	0.000178814
2.11681	3.17197		2.11681	3.20963		2.11681	3.32668			1.96437	0.0109375		1.96583	-0.0103936		1.96083	-0.00013411
2.12401	3.17176		2.12401	3.20907		2.12401	3.32466			1.97103	0.0119209		1.9725	-0.00965595		1.9675	-0.000752509
2.13121	3.17144		2.13121	3.20757		2.13121	3.32248			1.9777	0.0128001		1.97917	-0.0103638		1.97417	-0.00165403
2.13841	3.17082		2.13841	3.20531		2.13841	3.32028			1.98437	0.0131056		1.98583	-0.0115782		1.98083	-0.00274926
2.14561	3.16984		2.14561	3.20258		2.14561	3.31824			1.99103	0.0130311		1.9925	-0.0123605		1.9875	-0.00396371
2.15281	3.1686		2.15281	3.19971		2.15281	3.31653			1.9977	0.013262		1.99917	-0.0127479		1.99417	-0.00473857
2.16001	3.16728		2.16001	3.197		2.16001	3.31526			2.00437	0.0130832		2.00583	-0.0130609		2.00083	-0.00481308
2.16721	3.16604		2.16721	3.19471		2.16721	3.31457			2.01103	0.0127926		2.0125	-0.0133514		2.0075	-0.0038743
2.17441	3.16501		2.17441	3.19307		2.17441	3.31451			2.0177	0.0126585		2.01917	-0.0133216		2.01417	-0.00223517
2.18161	3.16427		2.18161	3.19225		2.18161	3.31501			2.02437	0.0130162		2.02583	-0.0131652		2.02083	-0.000923872
2.18881	3.16388		2.18881	3.1923		2.18881	3.31593			2.03103	0.0136048		2.0325	-0.0133589		2.0275	-0.000290573
2.19601	3.1639		2.19601	3.19309		2.19601	3.31703			2.0377	0.0136048		2.03917	-0.0136197		2.03417	-0.000476837
2.20321	3.1643		2.20321	3.19439		2.20321	3.31816			2.04437	0.0132024		2.04583	-0.013642		2.04083	-0.00108033
2.21041	3.16503		2.21041	3.19588		2.21041	3.31919			2.05103	0.0125915		2.0525	-0.0134632		2.0475	-0.00171363
2.21761	3.16601		2.21761	3.19731		2.21761	3.32004			2.0577	0.0120774		2.05917	-0.0133365		2.05417	-0.00190735
2.22481	3.16722		2.22481	3.19843		2.22481	3.32063			2.06437	0.0117272		2.06583	-0.0134408		2.06083	-0.00130385
2.23201	3.16862		2.23201	3.19915		2.23201	3.32094			2.07103	0.0113323		2.0725	-0.0134781		2.0675	-0.000201166
2.23921	3.17019		2.23921	3.19946		2.23921	3.32104			2.0777	0.0109076		2.07917	-0.0133514		2.07417	0.000983477
2.24641	3.17182		2.24641	3.19951		2.24641	3.32105			2.08437	0.010848		2.08583	-0.0130385		2.08083	0.00174344
2.25361	3.1734		2.25361	3.19957		2.25361	3.32119			2.09103	0.011228		2.0925	-0.0122488		2.0875	0.0019744
2.26081	3.17481		2.26081	3.19985		2.26081	3.32158			2.0977	0.0118166		2.09917	-0.0111237		2.09417	0.00159442
2.26801	3.17588		2.26801	3.20054		2.26801	3.3223			2.10437	0.0121295		2.10583	-0.0101924		2.10083	0.000946224
2.27521	3.17654		2.27521	3.20169		2.27521	3.32341			2.11103	0.0123084		2.1125	-0.00988692		2.1075	0.000245869
2.28241	3.17678		2.28241	3.2033		2.28241	3.32497			2.1177	0.0130385		2.11917	-0.0100806		2.11417	-0.000275671
2.28961	3.17679		2.28961	3.20525		2.28961	3.32705			2.12437	0.0141412		2.12583	-0.01055		2.12083	-0.000402331
2.29681	3.17683		2.29681	3.20727		2.29681	3.3296			2.13103	0.0150278		2.1325	-0.0115111		2.1275	-0.000216067
2.30401	3.17724		2.30401	3.20902		2.30401	3.33239			2.1377	0.0156239		2.13917	-0.0129193		2.13417	0.000439584
2.31121	3.17827		2.31121	3.21012		2.31121	3.33511			2.14437	0.0159889		2.14583	-0.0140816		2.14083	0.00144541
2.31841	3.18009		2.31841	3.21031		2.31841	3.3374			2.15103	0.0161529		2.1525	-0.0147447		2.1475	0.00263005
2.32561	3.1827		2.32561	3.20951		2.32561	3.339			2.1577	0.0154674		2.15917	-0.0147447		2.15417	0.00361353
2.33281	3.18595		2.33281	3.20787		2.33281	3.33968			2.16437	0.0140965		2.16583	-0.0143498		2.16083	0.00402331
2.34001	3.18954		2.34001	3.20563		2.34001	3.33926			2.17103	0.0127256		2.1725	-0.0136942		2.1675	0.00394881
2.34722	3.19301		2.34722	3.20305		2.34722	3.33765			2.1777	0.0116453		2.17917	-0.0129938		2.17417	0.00362098
2.35442	3.19594		2.35442	3.20039		2.35442	3.33494			2.18437	0.0111908		2.18583	-0.0125021		2.18083	0.00314415
2.36162	3.19794		2.36162	3.19791		2.36162	3.33139			2.19103	0.0110269		2.1925	-0.0118911		2.1875	0.00263005
2.36882	3.19886		2.36882	3.19588		2.36882	3.32741			2.1977	0.011228		2.19917	-0.0112504		2.19417	0.00218302
2.37602	3.19866		2.37602	3.19446		2.37602	3.32342			2.20437	0.0117645		2.20583	-0.0108331		2.20083	0.00206381
2.38322	3.19749		2.38322	3.19373		2.38322	3.31985			2.21103	0.0124425		2.2125	-0.0106469		2.2075	0.00225753
2.39042	3.19562		2.39042	3.19367		2.39042	3.31696			2.2177	0.012815		2.21917	-0.0105724		2.21417	0.00255555
2.39762	3.19338		2.39762	3.19425		2.39762	3.31494			2.22437	0.0125766		2.22583	-0.0104159		2.22083	0.00258535
2.40482	3.19106		2.40482	3.19544		2.40482	3.3138			2.23103	0.0120625		2.2325	-0.0102147		2.2275	0.00236928
2.41202	3.18883		2.41202	3.19726		2.41202	3.31342			2.2377	0.0115186		2.23917	-0.00993907		2.23417	0.00204146
2.41922	3.18676		2.41922	3.19968		2.41922	3.31352			2.24437	0.0113919		2.24583	-0.0096336		2.24083	0.00220537
2.42642	3.1849		2.42642	3.20254		2.42642	3.31385			2.25103	0.0117049		2.2525	-0.00979751		2.2475	0.0025928
2.43362	3.18332		2.43362	3.2056		2.43362	3.31419			2.2577	0.0123382		2.25917	-0.0102296		2.25417	0.00274926
2.44082	3.1821		2.44082	3.20857		2.44082	3.31449			2.26437	0.0129342		2.26583	-0.0105724		2.26083	0.00261515
2.44802	3.18127		2.44802	3.21116		2.44802	3.31478			2.27103	0.0134781		2.2725	-0.0107512		2.2675	0.00237674
2.45522	3.1808		2.45522	3.21314		2.45522	3.31512			2.2777	0.0140816		2.27917	-0.0112429		2.27417	0.00242889
2.46242	3.18062		2.46242	3.21438		2.46242	3.31562			2.28437	0.0140443		2.28583	-0.0121519		2.28083	0.00223517
2.46962	3.18069		2.46962	3.21482		2.46962	3.31642			2.29103	0.0131354		2.2925	-0.0127628		2.2875	0.00167638
2.47682	3.18099		2.47682	3.21452		2.47682	3.31771			2.2977	0.011988		2.29917	-0.0128224		2.29417	0.00106543
2.48402	3.18132		2.48402	3.21361		2.48402	3.3196			2.30437	0.0112653		2.30583	-0.0128448		2.30083	0.00090152
2.49122	3.18149		2.49122	3.21233		2.49122	3.32204			2.31103	0.0108629		2.3125	-0.0130236		2.3075	0.00108778
2.49842	3.18121		2.49842	3.21093		2.49842	3.32484			2.3177	0.010632		2.31917	-0.0129119		2.31417	0.0013411
2.50562	3.18037		2.50562	3.20966		2.50562	3.32782			2.32437	0.0106171		2.32583	-0.0122264		2.32083	0.00153482
2.51282	3.17906		2.51282	3.20873		2.51282	3.33085			2.33103	0.010848		2.3325	-0.0113249		2.3275	0.00174344
2.52002	3.17749		2.52002	3.2082		2.52002	3.33378			2.3377	0.011012		2.33917	-0.0105575		2.33417	0.00170618
2.52722	3.17593		2.52722	3.20807		2.52722	3.33639			2.34437	0.0111684		2.34583	-0.00986457		2.34083	0.00115484
2.53442	3.17459		2.53442	3.20829		2.53442	3.33837			2.35103	0.0115484		2.3525	-0.00928342		2.3475	0.000372529
2.54162	3.17361		2.54162	3.2088		2.54162	3.33941			2.3577	0.0120476		2.35917	-0.00922382		2.35417	-0.000603497
2.54882	3.17305		2.54882	3.20951		2.54882	3.33933			2.36437	0.0125542		2.36583	-0.009574		2.36083	-0.00160933
2.55602	3.17293		2.55602	3.21031		2.55602	3.33803			2.37103	0.0133514		2.3725	-0.010334		2.3675	-0.00214577
2.56322	3.17317		2.56322	3.21114		2.56322	3.33552			2.3777	0.0142902		2.37917	-0.0112131		2.37417	-0.00199676
2.57042	3.1736		2.57042	3.21196		2.57042	3.33184			2.38437	0.0148565		2.38583	-0.0120327		2.38083	-0.00143796
2.57762	3.17405		2.57762	3.21271		2.57762	3.3272			2.39103	0.0146627		2.3925	-0.0127479		2.3875	-0.00120699
2.58482	3.17445		2.58482	3.21343		2.58482	3.32206			2.3977	0.0138283		2.39917	-0.0132248		2.39417	-0.00124425
2.59202	3.17485		2.59202	3.21414		2.59202	3.31699			2.40437	0.0131205		2.40583	-0.0138134		2.40083	-0.000931323
2.59922	3.17535		2.59922	3.21494		2.59922	3.31256			2.41103	0.0124797		2.4125	-0.0143498		2.4075	-0.000499189
2.60642	3.17605		2.60642	3.21589		2.60642	3.30918			2.4177	0.0118241		2.41917	-0.0147149		2.41417	-0.000394881
2.61362	3.17693		2.61362	3.21695		2.61362	3.30716			2.42437	0.0110269		2.42583	-0.0149384		2.42083	-0.000461936
2.62082	3.17795		2.62082	3.21805		2.62082	3.30659			2.43103	0.0102893		2.4325	-0.0151843		2.4275	6.70552e-05
2.62802	3.17896		2.62802	3.219		2.62802	3.30741			2.4377	0.00982732		2.43917	-0.0157952		2.43417	0.0012219
2.63522	3.17982		2.63522	3.21965		2.63522	3.30933			2.44437	0.00938028		2.44583	-0.0163764		2.44083	0.00218302
2.64242	3.18036		2.64242	3.2198		2.64242	3.31184			2.45103	0.00879914		2.4525	-0.0167117		2.4475	0.00239909
2.64962	3.18047		2.64962	3.21921		2.64962	3.31441			2.4577	0.00824779		2.45917	-0.0166744		2.45417	0.00242889
2.65682	3.18015		2.65682	3.21774		2.65682	3.31656			2.46437	0.00806898		2.46583	-0.0163987		2.46083	0.00234693
2.66402	3.17947		2.66402	3.21537		2.66402	3.31793			2.47103	0.00820309		2.4725	-0.0156984		2.4675	0.00167638
2.67122	3.17852		2.67122	3.21229		2.67122	3.31827			2.4777	0.00838935		2.47917	-0.0146329		2.47417	0.00025332
2.67842	3.17741		2.67842	3.20882		2.67842	3.31748			2.48437	0.00837445		2.48583	-0.0137612		2.48083	-0.00113994
2.68562	3.17622		2.68562	3.20535		2.68562	3.31569			2.49103	0.00841916		2.4925	-0.0132173		2.4875	-0.00163913
2.69282	3.175		2.69282	3.20227		2.69282	3.31324			2.4977	0.00881404		2.49917	-0.013262		2.49417	-0.00143051
2.70002	3.1738		2.70002	3.19986		2.70002	3.31059			2.50437	0.00967085		2.50583	-0.013575		2.50083	-0.000797212
2.70722	3.17261		2.70722	3.1983		2.70722	3.30815			2.51103	0.0107214		2.5125	-0.0141338		2.5075	0.000111759
2.71442	3.1714		2.71442	3.19765		2.71442	3.30626			2.5177	0.0114888		2.51917	-0.0145212		2.51417	0.00127405
2.72162	3.17025		2.72162	3.1978		2.72162	3.30527			2.52437	0.0118986		2.52583	-0.0142977		2.52083	0.00222027
2.72882	3.16929		2.72882	3.19851		2.72882	3.30543			2.53103	0.0120327		2.5325	-0.0137612		2.5275	0.00264496
2.73602	3.16861		2.73602	3.19939		2.73602	3.30688			2.5377	0.0121891		2.53917	-0.0132322		2.53417	0.00236928
2.74322	3.16824		2.74322	3.20005		2.74322	3.30953			2.54437	0.0123978		2.54583	-0.0129119		2.54083	0.00154227
2.75042	3.16808		2.75042	3.20032		2.75042	3.31306			2.55103	0.0122488		2.5525	-0.0127181		2.5475	0.000916421
2.75762	3.16805		2.75762	3.20019		2.75762	3.31701			2.5577	0.0117868		2.55917	-0.0125617		2.55417	0.000931323
2.76482	3.16811		2.76482	3.19986		2.76482	3.32096			2.56437	0.0113025		2.56583	-0.0126585		2.56083	0.0013262
2.77202	3.16822		2.77202	3.19953		2.77202	3.32451			2.57103	0.010848		2.5725	-0.0132024		2.5675	0.00170618
2.77922	3.16837		2.77922	3.19939		2.77922	3.32731			2.5777	0.0102669		2.57917	-0.0137463		2.57417	0.00206381
2.78642	3.16855		2.78642	3.19961		2.78642	3.3291			2.58437	0.00951439		2.58583	-0.0137836		2.58083	0.00283122
2.79362	3.16879		2.79362	3.20041		2.79362	3.32972			2.59103	0.00935048		2.5925	-0.0134408		2.5875	0.00333786
2.80082	3.16927		2.80082	3.20188		2.80082	3.32915			2.5977	0.0100359		2.59917	-0.0128224		2.59417	0.00303984
2.80802	3.17019		2.80802	3.20399		2.80802	3.32749			2.60437	0.0111386		2.60583	-0.0120476		2.60083	0.00211596
2.81522	3.17162		2.81522	3.20646		2.81522	3.32494			2.61103	0.0121519		2.6125	-0.0108108		2.6075	0.00121444
2.82242	3.17345		2.82242	3.20899		2.82242	3.3218			2.6177	0.0127107		2.61917	-0.0096336		2.61417	0.000476837
2.82962	3.17538		2.82962	3.21137		2.82962	3.31832			2.62437	0.0128672		2.62583	-0.00912696		2.62083	2.23517e-05
2.83682	3.17698		2.83682	3.21352		2.83682	3.31482			2.63103	0.0128523		2.6325	-0.00938773		2.6275	9.68575e-05
2.84402	3.17795		2.84402	3.21547		2.84402	3.3116			2.6377	0.0129491		2.63917	-0.0103265		2.63417	0.000871718
2.85122	3.1781		2.85122	3.2172		2.85122	3.30898			2.64437	0.0132024		2.64583	-0.0118092		2.64083	0.00175089
2.85842	3.17737		2.85842	3.21867		2.85842	3.30731			2.65103	0.0134781		2.6525	-0.013411		2.6475	0.00230968
2.86562	3.1758		2.86562	3.21985		2.86562	3.30685			2.6577	0.0137389		2.65917	-0.0147596		2.65417	0.00255555
2.87282	3.17339		2.87282	3.22083		2.87282	3.30765			2.66437	0.0143647		2.66583	-0.0157207		2.66083	0.00241399
2.88002	3.17032		2.88002	3.22165		2.88002	3.30954			2.67103	0.01508		2.6725	-0.0163913		2.6675	0.00173599
2.88722	3.16688		2.88722	3.22234		2.88722	3.3122			2.6777	0.0154749		2.67917	-0.0165701		2.67417	0.000745058
2.89442	3.16344		2.89442	3.22272		2.89442	3.31514			2.68437	0.015527		2.68583	-0.0159815		2.68083	5.21541e-05
2.90162	3.16032		2.90162	3.22257		2.90162	3.31784			2.69103	0.0152141		2.6925	-0.0147596		2.6875	-0.000119209
2.90882	3.15775		2.90882	3.22166		2.90882	3.31984			2.6977	0.0144839		2.69917	-0.0135005		2.69417	8.9407e-05
2.91602	3.15587		2.91602	3.21996		2.91602	3.3208			2.70437	0.0132173		2.70583	-0.0125468		2.70083	0.000223517
2.92322	3.15483		2.92322	3.21757		2.92322	3.32062			2.71103	0.0120848		2.7125	-0.0120625		2.7075	0.000536442
2.93042	3.15475		2.93042	3.21475		2.93042	3.31942			2.7177	0.0115335		2.71917	-0.0120401		2.71417	0.000864267
2.93762	3.15576		2.93762	3.21186		2.93762	3.31748			2.72437	0.0114143		2.72583	-0.0126362		2.72083	0.000983477
2.94482	3.15779		2.94482	3.20926		2.94482	3.31523			2.73103	0.0116453		2.7325	-0.0139326		2.7275	0.000469387
2.95202	3.16072		2.95202	3.20735		2.95202	3.31315			2.7377	0.0121593		2.73917	-0.015147		2.73417	-0.000715256
2.95922	3.16425		2.95922	3.20645		2.95922	3.31164			2.74437	0.0129789		2.74583	-0.0160262		2.74083	-0.00186265
2.96642	3.16806		2.96642	3.20674		2.96642	3.31088			2.75103	0.0132248		2.7525	-0.0159815		2.7475	-0.0026226
2.97362	3.17184		2.97362	3.20816		2.97362	3.31078			2.7577	0.0127703		2.75917	-0.0151694		2.75417	-0.00284612
2.98082	3.17526		2.98082	3.21037		2.98082	3.31111			2.76437	0.0120625		2.76583	-0.0137761		2.76083	-0.00278652
2.98802	3.17808		2.98802	3.21282		2.98802	3.31169			2.77103	0.011906		2.7725	-0.0123158		2.7675	-0.00268966
2.99522	3.18009		2.99522	3.21496		2.99522	3.31239			2.7777	0.0126064		2.77917	-0.0114217		2.77417	-0.00236928
3.00242	3.18113		3.00242	3.21638		3.00242	3.31302			2.78437	0.013262		2.78583	-0.0108704		2.78083	-0.00187755
3.00962	3.18111		3.00962	3.21688		3.00962	3.31337			2.79103	0.0135973		2.7925	-0.0105053		2.7875	-0.00137836
3.01682	3.18006		3.01682	3.21642		3.01682	3.31321			2.7977	0.0139624		2.79917	-0.0107437		2.79417	-0.00108033
3.02402	3.1781		3.02402	3.21506		3.02402	3.31252			2.80437	0.0146255		2.80583	-0.0116676		2.80083	-0.000908971
3.03122	3.17538		3.03122	3.21302		3.03122	3.31146			2.81103	0.0150204		2.8125	-0.0127032		2.8075	-0.00051409
3.03842	3.17207		3.03842	3.21062		3.03842	3.31024			2.8177	0.0145808		2.81917	-0.0131875		2.81417	-0.000238419
3.04562	3.16832		3.04562	3.20815		3.04562	3.30894			2.82437	0.0138432		2.82583	-0.0136271		2.82083	-0.000476837
3.05282	3.1643		3.05282	3.20582		3.05282	3.30757			2.83103	0.0133812		2.8325	-0.0149086		2.8275	-0.00108778
3.06002	3.16023		3.06002	3.20367		3.06002	3.30618			2.8377	0.0127628		2.83917	-0.0165775		2.83417	-0.00175089
3.06722	3.1563		3.06722	3.20161		3.06722	3.30495			2.84437	0.0115931		2.84583	-0.0176057		2.84083	-0.00227988
3.07442	3.15275		3.07442	3.19963		3.07442	3.30407			2.85103	0.0103265		2.8525	-0.0177845		2.8475	-0.0025779
3.08162	3.1498		3.08162	3.19783		3.08162	3.30356			2.8577	0.0096634		2.85917	-0.0176057		2.85417	-0.00216812
3.08882	3.14766		3.08882	3.19631		3.08882	3.3033			2.86437	0.00988692		2.86583	-0.0171214		2.86083	-0.000931323
3.09602	3.14655		3.09602	3.19515		3.09602	3.3031			2.87103	0.0102296		2.8725	-0.0164285		2.8675	0.000208616
3.10322	3.1466		3.10322	3.19443		3.10322	3.30287			2.8777	0.0104085		2.87917	-0.0153929		2.87417	0.000700355
3.11042	3.14791		3.11042	3.19421		3.11042	3.30261			2.88437	0.010334		2.88583	-0.0147149		2.88083	0.000499189
3.11762	3.15045		3.11762	3.19458		3.11762	3.30238			2.89103	0.0103712		2.8925	-0.0146478		2.8875	9.68575e-05
3.12482	3.15404		3.12482	3.19555		3.12482	3.30219			2.8977	0.0103489		2.89917	-0.0150949		2.89417	-0.000245869
3.13202	3.15834		3.13202	3.19699		3.13202	3.30204			2.90437	0.00996888		2.90583	-0.0156984		2.90083	-0.000715256
3.13922	3.16291		3.13922	3.19868		3.13922	3.30197			2.91103	0.0096187		2.9125	-0.015825		2.9075	-0.00111014
3.14642	3.1673		3.14642	3.20044		3.14642	3.30204			2.9177	0.00935048		2.91917	-0.015907		2.91417	-0.0013113
3.15362	3.17112		3.15362	3.20218		3.15362	3.30231			2.92437	0.00965595		2.92583	-0.0158027		2.92083	-0.000916421
3.16082	3.17409		3.16082	3.20385		3.16082	3.30279			2.93103	0.00999123		2.9325	-0.0154376		2.9275	-7.45058e-06
3.16802	3.17605		3.16802	3.20537		3.16802	3.30349			2.9377	0.0102594		2.93917	-0.014998		2.93417	0.000685453
3.17522	3.17698		3.17522	3.20662		3.17522	3.30444			2.94437	0.0103936		2.94583	-0.0149012		2.94083	0.000998378
3.18242	3.17704		3.18242	3.20743		3.18242	3.30573			2.95103	0.0103861		2.9525	-0.0151694		2.9475	0.00108778
3.18962	3.17653		3.18962	3.2077		3.18962	3.30747			2.9577	0.0108778		2.95917	-0.015229		2.95417	0.0012517
3.19682	3.17577		3.19682	3.20734		3.19682	3.30975			2.96437	0.0116304		2.96583	-0.0153333		2.96083	0.00113994
3.20402	3.17502		3.20402	3.20632		3.20402	3.31258			2.97103	0.0125989		2.9725	-0.015907		2.9675	0.000216067
3.21122	3.17441		3.21122	3.20467		3.21122	3.31584			2.9777	0.0135303		2.97917	-0.0164136		2.97417	-0.00115484
3.21842	3.17398		3.21842	3.20251		3.21842	3.31932			2.98437	0.0142083		2.98583	-0.0161752		2.98083	-0.00244379
3.22562	3.17374		3.22562	3.20004		3.22562	3.32269			2.99103	0.0150725		2.9925	-0.0152513		2.9875	-0.0032112
3.23282	3.1737		3.23282	3.19752		3.23282	3.32563			2.9977	0.0158176		2.99917	-0.0145435		2.99417	-0.00347197
3.24002	3.17381		3.24002	3.19512		3.24002	3.32779			3.00437	0.016503		3.00583	-0.0143871		3.00083	-0.0032261
3.24722	3.17397		3.24722	3.19303		3.24722	3.32891			3.01103	0.0167042		3.0125	-0.0143275		3.0075	-0.00277907
3.25442	3.17404		3.25442	3.19132		3.25442	3.32889			3.0177	0.0164062		3.01917	-0.0146925		3.01417	-0.00233203
3.26162	3.17391		3.26162	3.19008		3.26162	3.32794			3.02437	0.0159889		3.02583	-0.0157207		3.02083	-0.00169873
3.26882	3.17346		3.26882	3.18934		3.26882	3.3264			3.03103	0.0153109		3.0325	-0.0170022		3.0275	-0.000692904
3.27602	3.17267		3.27602	3.18913		3.27602	3.32474			3.0377	0.0146106		3.03917	-0.0179112		3.03417	0.000469387
3.28322	3.17163		3.28322	3.1894		3.28322	3.32327			3.04437	0.0137761		3.04583	-0.018172		3.04083	0.00121444
3.29042	3.17048		3.29042	3.19011		3.29042	3.32215			3.05103	0.0129044		3.0525	-0.018388		3.0475	0.00174344
3.29762	3.16941		3.29762	3.19124		3.29762	3.32143			3.0577	0.0121966		3.05917	-0.0184178		3.05417	0.00227243
3.30482	3.16859		3.30482	3.1928		3.30482	3.32109			3.06437	0.011757		3.06583	-0.0180081		3.06083	0.0025928
3.31202	3.16827		3.31202	3.19473		3.31202	3.32105			3.07103	0.0120103		3.0725	-0.0174344		3.0675	0.00236928
3.31922	3.16867		3.31922	3.19692		3.31922	3.32113			3.0777	0.0129044		3.07917	-0.0168234		3.07417	0.00166148
3.32642	3.16997		3.32642	3.19917		3.32642	3.32109			3.08437	0.0137314		3.08583	-0.0164062		3.08083	0.00110269
3.33362	3.17219		3.33362	3.20124		3.33362	3.32077			3.09103	0.0144392		3.0925	-0.0158548		3.0875	0.000923872
3.34082	3.17506		3.34082	3.20285		3.34082	3.32017			3.0977	0.0149831		3.09917	-0.0151843		3.09417	0.00103563
3.34802	3.1782		3.34802	3.20382		3.34802	3.31945			3.10437	0.0153631		3.10583	-0.0146851		3.10083	0.00109524
3.35522	3.18113		3.35522	3.20404		3.35522	3.31878			3.11103	0.0150129		3.1125	-0.0146627		3.1075	0.000983477
3.36242	3.18353		3.36242	3.20351		3.36242	3.31822			3.1177	0.0135452		3.11917	-0.0151619		3.11417	0.000752509
3.36962	3.18521		3.36962	3.20222		3.36962	3.31774			3.12437	0.0120327		3.12583	-0.0157803		3.12083	0.000499189
3.37682	3.18614		3.37682	3.20023		3.37682	3.31728			3.13103	0.0109971		3.1325	-0.016205		3.1275	0.000216067
3.38402	3.1864		3.38402	3.19775		3.38402	3.31684			3.1377	0.0106543		3.13917	-0.0164136		3.13417	-0.00013411
3.39122	3.18615		3.39122	3.19511		3.39122	3.31642			3.14437	0.0106841		3.14583	-0.0166818		3.14083	-0.000789762
3.39842	3.18571		3.39842	3.19272		3.39842	3.31609			3.15103	0.0109822		3.1525	-0.0169948		3.1475	-0.00160187
3.40562	3.18533		3.40562	3.19089		3.40562	3.3159			3.1577	0.0114143		3.15917	-0.0169501		3.15417	-0.00205636
3.41282	3.18519		3.41282	3.18981		3.41282	3.31594			3.16437	0.0116602		3.16583	-0.0165328		3.16083	-0.00219047
3.42002	3.18531		3.42002	3.18956		3.42002	3.31627			3.17103	0.0116602		3.1725	-0.0160262		3.1675	-0.00227243
3.42722	3.18551		3.42722	3.1902		3.42722	3.31694			3.1777	0.0115484		3.17917	-0.0157952		3.17417	-0.00247359
3.43442	3.18561		3.43442	3.19173		3.43442	3.3179			3.18437	0.0115335		3.18583	-0.0157878		3.18083	-0.00233203
3.44162	3.18547		3.44162	3.19405		3.44162	3.31905			3.19103	0.0117049		3.1925	-0.0157505		3.1875	-0.00196695
3.44882	3.18507		3.44882	3.19692		3.44882	3.32022			3.1977	0.0123009		3.19917	-0.0158623		3.19417	-0.00189245
3.45602	3.18447		3.45602	3.20004		3.45602	3.32118			3.20437	0.0133216		3.20583	-0.0158846		3.20083	-0.0019446
3.46322	3.18378		3.46322	3.20308		3.46322	3.32171			3.21103	0.0145808		3.2125	-0.0157952		3.2075	-0.00169873
3.47042	3.1831		3.47042	3.20581		3.47042	3.32164			3.2177	0.0154153		3.21917	-0.0157133		3.21417	-0.00111759
3.47762	3.18251		3.47762	3.20804		3.47762	3.32096			3.22437	0.0155792		3.22583	-0.0157878		3.22083	-0.000745058
3.48482	3.18202		3.48482	3.20961		3.48482	3.31974			3.23103	0.0150725		3.2325	-0.0162274		3.2275	-0.000745058
3.49202	3.18154		3.49202	3.21036		3.49202	3.31808			3.2377	0.0144392		3.23917	-0.0167042		3.23417	-0.000700355
3.49922	3.18093		3.49922	3.21022		3.49922	3.31606			3.24437	0.0136793		3.24583	-0.0172108		3.24083	-0.000447035
3.50642	3.17999		3.50642	3.20922		3.50642	3.31368			3.25103	0.012666		3.2525	-0.0177622		3.2475	-0.000238419
3.51362	3.17866		3.51362	3.20742		3.51362	3.31097			3.2577	0.0116378		3.25917	-0.0181198		3.25417	-0.000171363
3.52082	3.17695		3.52082	3.20503		3.52082	3.30798			3.26437	0.0112504		3.26583	-0.0179783		3.26083	6.70552e-05
3.52802	3.17498		3.52802	3.20233		3.52802	3.30471			3.27103	0.0118986		3.2725	-0.0172332		3.2675	0.000737607
3.53522	3.17293		3.53522	3.19966		3.53522	3.30128			3.2777	0.0126809		3.27917	-0.016503		3.27417	0.00143796
3.54242	3.17097		3.54242	3.19738		3.54242	3.29786			3.28437	0.0131279		3.28583	-0.0159964		3.28083	0.00176579
3.54962	3.16925		3.54962	3.19576		3.54962	3.29478			3.29103	0.0136793		3.2925	-0.0160113		3.2875	0.00171363
3.55682	3.16796		3.55682	3.19492		3.55682	3.29249			3.2977	0.0148267		3.29917	-0.0165105		3.29417	0.00174344
3.56402	3.16722		3.56402	3.19477		3.56402	3.29143			3.30437	0.0160262		3.30583	-0.0171438		3.30083	0.0019148
3.57122	3.16709		3.57122	3.19511		3.57122	3.29192			3.31103	0.0166446		3.3125	-0.0174493		3.3075	0.00195205
3.57842	3.1675		3.57842	3.1957		3.57842	3.2941			3.3177	0.0169352		3.31917	-0.0171959		3.31417	0.00174344
3.58562	3.16841		3.58562	3.19622		3.58562	3.29785			3.32437	0.017412		3.32583	-0.0170618		3.32083	0.00171363
3.59282	3.16975		3.59282	3.19641		3.59282	3.30278			3.33103	0.0175312		3.3325	-0.0168234		3.3275	0.00208616
3.60002	3.17149		3.60002	3.19608		3.60002	3.30831			3.3377	0.0169054		3.33917	-0.0164285		3.33417	0.00238419
3.60722	3.17354		3.60722	3.19522		3.60722	3.31379			3.34437	0.0158846		3.34583	-0.0160262		3.34083	0.00232458
3.61442	3.17568		3.61442	3.19402		3.61442	3.31857			3.35103	0.0150949		3.3525	-0.016205		3.3475	0.00204891
3.62162	3.17762		3.62162	3.19278		3.62162	3.32221			3.3577	0.0147521		3.35917	-0.0171438		3.35417	0.00189245
3.62882	3.17906		3.62882	3.19182		3.62882	3.3245			3.36437	0.0144616		3.36583	-0.0181273		3.36083	0.00137091
3.63602	3.17975		3.63602	3.1914		3.63602	3.32543			3.37103	0.0141039		3.3725	-0.018768		3.3675	0.000305474
3.64322	3.17958		3.64322	3.19165		3.64322	3.32526			3.3777	0.0137389		3.37917	-0.0189245		3.37417	-0.000707805
3.65042	3.17861		3.65042	3.19263		3.65042	3.32438			3.38437	0.0134408		3.38583	-0.0187159		3.38083	-0.00102073
3.65762	3.17705		3.65762	3.19428		3.65762	3.32316			3.39103	0.0130683		3.3925	-0.0185296		3.3875	-0.000856817
3.66482	3.17523		3.66482	3.19641		3.66482	3.32188			3.3977	0.012666		3.39917	-0.0181645		3.39417	-0.00125915
3.67202	3.17352		3.67202	3.19873		3.67202	3.32071			3.40437	0.0123605		3.40583	-0.0175834		3.40083	-0.00226498
3.67922	3.17222		3.67922	3.20101		3.67922	3.31969			3.41103	0.0124425		3.4125	-0.0168085		3.4075	-0.00290573
3.68642	3.17149		3.68642	3.20308		3.68642	3.31882			3.4177	0.0127628		3.41917	-0.0159517		3.41417	-0.00277162
3.69362	3.17132		3.69362	3.20482		3.69362	3.31798			3.42437	0.0129044		3.42583	-0.0154674		3.42083	-0.00246614
3.70082	3.1715		3.70082	3.20616		3.70082	3.31706			3.43103	0.0126436		3.4325	-0.0152737		3.4275	-0.00237674
3.70802	3.17171		3.70802	3.20702		3.70802	3.316			3.4377	0.0120625		3.43917	-0.0152811		3.43417	-0.00184029
3.71522	3.17159		3.71522	3.20738		3.71522	3.31482			3.44437	0.0114292		3.44583	-0.0155047		3.44083	-0.000476837
3.72242	3.17082		3.72242	3.20732		3.72242	3.31365			3.45103	0.0109896		3.4525	-0.016205		3.4475	0.00103563
3.72962	3.16927		3.72962	3.20699		3.72962	3.31266			3.4577	0.0108778		3.45917	-0.0172108		3.45417	0.00170618
3.73682	3.16701		3.73682	3.20652		3.73682	3.31197			3.46437	0.0113472		3.46583	-0.0181198		3.46083	0.00167638
3.74402	3.16434		3.74402	3.20601		3.74402	3.31163			3.47103	0.0122562		3.4725	-0.0181198		3.4675	0.00167638
3.75122	3.16169		3.75122	3.20559		3.75122	3.31165			3.4777	0.0135526		3.47917	-0.0179037		3.47417	0.00200421
3.75842	3.15948		3.75842	3.20538		3.75842	3.31196			3.48437	0.0150427		3.48583	-0.0179037		3.48083	0.00258535
3.76562	3.15798		3.76562	3.20554		3.76562	3.31249			3.49103	0.016436		3.4925	-0.0181571		3.4875	0.00290573
3.77282	3.1574		3.77282	3.20614		3.77282	3.31312			3.4977	0.0173673		3.49917	-0.0185594		3.49417	0.00295043
3.78002	3.15778		3.78002	3.20709		3.78002	3.31379			3.50437	0.0175685		3.50583	-0.0188947		3.50083	0.00292808
3.78722	3.15903		3.78722	3.20819		3.78722	3.31439			3.51103	0.0173897		3.5125	-0.0196248		3.5075	0.0025183
3.79442	3.16088		3.79442	3.20921		3.79442	3.31491			3.5177	0.0168458		3.51917	-0.0200942		3.51417	0.00144541
3.80162	3.1629		3.80162	3.20992		3.80162	3.31534			3.52437	0.0161752		3.52583	-0.0200123		3.52083	-0.000201166
3.80882	3.16467		3.80882	3.21013		3.80882	3.31572			3.53103	0.0151247		3.5325	-0.019297		3.5275	-0.00184774
3.81602	3.16588		3.81602	3.2097		3.81602	3.31604			3.5377	0.0139624		3.53917	-0.0184849		3.53417	-0.00274926
3.82322	3.1664		3.82322	3.2086		3.82322	3.31631			3.54437	0.0128075		3.54583	-0.0180155		3.54083	-0.00327826
3.83042	3.16623		3.83042	3.20693		3.83042	3.31648			3.55103	0.0120401		3.5525	-0.0179559		3.5475	-0.00329316
3.83762	3.16545		3.83762	3.2049		3.83762	3.31656			3.5577	0.0116527		3.55917	-0.0180528		3.55417	-0.00276417
3.84482	3.16424		3.84482	3.20278		3.84482	3.31652			3.56437	0.0113919		3.56583	-0.0180826		3.56083	-0.00192225
3.85202	3.16278		3.85202	3.20082		3.85202	3.31637			3.57103	0.0115037		3.5725	-0.0183061		3.5675	-0.0012964
3.85922	3.16129		3.85922	3.19933		3.85922	3.31616			3.5777	0.0118464		3.57917	-0.0187904		3.57417	-0.00146031
3.86642	3.15997		3.86642	3.19855		3.86642	3.316			3.58437	0.0126511		3.58583	-0.0188351		3.58083	-0.0019595
3.87362	3.15894		3.87362	3.19864		3.87362	3.31597			3.59103	0.0133514		3.5925	-0.0179037		3.5875	-0.00266731
3.88082	3.15833		3.88082	3.19952		3.88082	3.3162			3.5977	0.0137836		3.59917	-0.0165105		3.59417	-0.00344962
3.88802	3.15824		3.88802	3.20098		3.88802	3.31671			3.60437	0.0140071		3.60583	-0.0157431		3.60083	-0.00432879
3.89522	3.15868		3.89522	3.20271		3.89522	3.31751			3.61103	0.0142902		3.6125	-0.0157654		3.6075	-0.00487268
3.90242	3.15964		3.90242	3.20442		3.90242	3.31852			3.6177	0.0150055		3.61917	-0.0158474		3.61417	-0.00507385
3.90963	3.16104		3.90963	3.20592		3.90963	3.31963			3.62437	0.015609		3.62583	-0.0162125		3.62083	-0.00520796
3.91683	3.16279		3.91683	3.20702		3.91683	3.32056			3.63103	0.0156686		3.6325	-0.0173673		3.6275	-0.00511855
3.92403	3.16475		3.92403	3.20759		3.92403	3.32111			3.6377	0.0151172		3.63917	-0.019148		3.63417	-0.00441074
3.93123	3.16671		3.93123	3.20762		3.93123	3.3211			3.64437	0.0145212		3.64583	-0.0202283		3.64083	-0.00295788
3.93843	3.16842		3.93843	3.20721		3.93843	3.32049			3.65103	0.0141338		3.6525	-0.0199676		3.6475	-0.00164658
3.94563	3.16972		3.94563	3.20658		3.94563	3.31926			3.6577	0.0137314		3.65917	-0.0190139		3.65417	-0.000871718
3.95283	3.17059		3.95283	3.20597		3.95283	3.31742			3.66437	0.0134483		3.66583	-0.0182316		3.66083	-0.000447035
3.96003	3.1712		3.96003	3.20554		3.96003	3.31504			3.67103	0.013262		3.6725	-0.0173226		3.6675	-0.000171363
3.96723	3.17177		3.96723	3.20533		3.96723	3.31224			3.6777	0.013344		3.67917	-0.0159666		3.67417	-0.000245869
3.97443	3.17253		3.97443	3.20531		3.97443	3.30923			3.68437	0.0133812		3.68583	-0.0143796		3.68083	-0.000856817
3.98163	3.17373		3.98163	3.20538		3.98163	3.30618			3.69103	0.0135601		3.6925	-0.0132024		3.6875	-0.00151992
3.98883	3.17558		3.98883	3.20536		3.98883	3.30324			3.6977	0.0139624		3.69917	-0.0128001		3.69417	-0.00181049
3.99603	3.17814		3.99603	3.2051		3.99603	3.30054			3.70437	0.0141189		3.70583	-0.0127628		3.70083	-0.001885
4.00323	3.18123		4.00323	3.20448		4.00323	3.2983			3.71103	0.0141412		3.7125	-0.0132844		3.7075	-0.00204146
4.01043	3.1844		4.01043	3.20347		4.01043	3.29677			3.7177	0.0139773		3.71917	-0.0142828		3.71417	-0.00234693
4.01763	3.1871		4.01763	3.20215		4.01763	3.29614			3.72437	0.0138506		3.72583	-0.0155419		3.72083	-0.00290573
4.02483	3.18894		4.02483	3.20061		4.02483	3.29641			3.73103	0.0132397		3.7325	-0.016883		3.7275	-0.00356138
4.03203	3.18974		4.03203	3.19901		4.03203	3.29745			3.7377	0.0119731		3.73917	-0.0180602		3.73417	-0.00399351
4.03923	3.18955		4.03923	3.1975		4.03923	3.299			3.74437	0.0111461		3.74583	-0.0189766		3.74083	-0.00368059
4.04643	3.18855		4.04643	3.19633		4.04643	3.30075			3.75103	0.0110045		3.7525	-0.0194162		3.7475	-0.00281632
4.05363	3.1871		4.05363	3.1957		4.05363	3.30235			3.7577	0.0114888		3.75917	-0.0193492		3.75417	-0.00213832
4.06083	3.18565		4.06083	3.19571		4.06083	3.30342			3.76437	0.0122041		3.76583	-0.0193194		3.76083	-0.00148267
4.06803	3.18472		4.06803	3.19625		4.06803	3.30372			3.77103	0.0130758		3.7725	-0.0191927		3.7675	-0.000849366
4.07523	3.18467		4.07523	3.19714		4.07523	3.30316			3.7777	0.0140592		3.77917	-0.0186488		3.77417	-0.000201166
4.08243	3.18564		4.08243	3.19816		4.08243	3.30182			3.78437	0.0144169		3.78583	-0.0175908		3.78083	-3.72529e-05
4.08963	3.18736		4.08963	3.19916		4.08963	3.29998			3.79103	0.0146106		3.7925	-0.0166297		3.7875	-0.000409782
4.09683	3.18936		4.09683	3.20002		4.09683	3.298			3.7977	0.0149161		3.79917	-0.0161454		3.79417	-0.000752509
4.10403	3.19101		4.10403	3.2006		4.10403	3.29624			3.80437	0.0154227		3.80583	-0.016056		3.80083	-0.00113994
4.11123	3.19176		4.11123	3.20077		4.11123	3.295			3.81103	0.0158474		3.8125	-0.0162199		3.8075	-0.00151992
4.11843	3.19127		4.11843	3.2005		4.11843	3.2944			3.8177	0.0161082		3.81917	-0.0167415		3.81417	-0.00198185
4.12563	3.18931		4.12563	3.19989		4.12563	3.29437			3.82437	0.0163466		3.82583	-0.0176281		3.82083	-0.00231713
4.13283	3.18589		4.13283	3.1992		4.13283	3.29472			3.83103	0.0162348		3.8325	-0.0184998		3.8275	-0.00244379
4.14003	3.18121		4.14003	3.19865		4.14003	3.29529			3.8377	0.0158474		3.83917	-0.0194237		3.83417	-0.00237674
4.14723	3.17573		4.14723	3.19842		4.14723	3.29592			3.84437	0.0154451		3.84583	-0.0199452		3.84083	-0.00217557
4.15443	3.17014		4.15443	3.19855		4.15443	3.29643			3.85103	0.015147		3.8525	-0.0200048		3.8475	-0.001885
4.16163	3.16516		4.16163	3.19902		4.16163	3.29673			3.8577	0.014849		3.85917	-0.0198781		3.85417	-0.00192225
4.16883	3.16125		4.16883	3.19976		4.16883	3.29677			3.86437	0.0147521		3.86583	-0.0197813		3.86083	-0.00212342
4.17603	3.15861		4.17603	3.20073		4.17603	3.29665			3.87103	0.0150576		3.8725	-0.019595		3.8675	-0.00201166
4.18323	3.15719		4.18323	3.20178		4.18323	3.29646			3.8777	0.0155717		3.87917	-0.0191182		3.87417	-0.00170618
4.19043	3.1568		4.19043	3.20275		4.19043	3.29626			3.88437	0.0155345		3.88583	-0.0187755		3.88083	-0.00149757
4.19763	3.15711		4.19763	3.20343		4.19763	3.29598			3.89103	0.0152737		3.8925	-0.0185594		3.8875	-0.00147521
4.20483	3.15771		4.20483	3.20367		4.20483	3.29552			3.8977	0.0154451		3.89917	-0.0181198		3.89417	-0.00102073
4.21203	3.15809		4.21203	3.20339		4.21203	3.29483			3.90437	0.015907		3.90583	-0.0173599		3.90083	-0.000409782
4.21923	3.15797		4.21923	3.20264		4.21923	3.29397			3.91103	0.0161603		3.9125	-0.016816		3.9075	-0.000320375
4.22643	3.15729		4.22643	3.20151		4.22643	3.29303			3.9177	0.0162423		3.91917	-0.0169054		3.91417	-0.000610948
4.23363	3.1562		4.23363	3.2001		4.23363	3.29208			3.92437	0.0168756		3.92583	-0.0178292		3.92083	-0.000812113
4.24083	3.15496		4.24083	3.1985		4.24083	3.29126			3.93103	0.0177771		3.9325	-0.0194013		3.9275	-0.000879169
4.24803	3.15384		4.24803	3.19686		4.24803	3.29074			3.9377	0.0179484		3.93917	-0.0208616		3.93417	-0.000976026
4.25523	3.15315		4.25523	3.19535		4.25523	3.29078			3.94437	0.0175536		3.94583	-0.021562		3.94083	-0.00121444
4.26243	3.15313		4.26243	3.19419		4.26243	3.29159			3.95103	0.0169873		3.9525	-0.02148		3.9475	-0.00151247
4.26963	3.15398		4.26963	3.19352		4.26963	3.29324			3.9577	0.016354		3.95917	-0.020884		3.95417	-0.0019595
4.27683	3.15568		4.27683	3.19337		4.27683	3.2957			3.96437	0.0155792		3.96583	-0.020057		3.96083	-0.00248849
4.28403	3.15802		4.28403	3.19362		4.28403	3.29882			3.97103	0.0147		3.9725	-0.0193715		3.9675	-0.00274926
4.29123	3.16076		4.29123	3.19416		4.29123	3.30241			3.9777	0.0140145		3.97917	-0.0190437		3.97417	-0.00300258
4.29843	3.16362		4.29843	3.19488		4.29843	3.30625			3.98437	0.013493		3.98583	-0.0189841		3.98083	-0.00315905
4.30563	3.16641		4.30563	3.19569		4.30563	3.31008			3.99103	0.0133589		3.9925	-0.0188127		3.9875	-0.00289083
4.31283	3.16899		4.31283	3.19648		4.31283	3.31366			3.9977	0.0136048		3.99917	-0.0185221		3.99417	-0.00215322
4.32003	3.17131		4.32003	3.19716		4.32003	3.31678			4.00437	0.0139326		4.00583	-0.0179708		4.00083	-0.0013262
4.32723	3.17339		4.32723	3.19767		4.32723	3.31936			4.01103	0.01432		4.0125	-0.0171959		4.0075	-0.000745058
4.33443	3.17533		4.33443	3.19806		4.33443	3.32135			4.0177	0.0150874		4.01917	-0.0164434		4.01417	-5.21541e-05
4.34163	3.17713		4.34163	3.19848		4.34163	3.32277			4.02437	0.0160336		4.02583	-0.0160709		4.02083	0.000789762
4.34883	3.17876		4.34883	3.19906		4.34883	3.32362			4.03103	0.0166818		4.0325	-0.0158921		4.0275	0.00136346
4.35603	3.18012		4.35603	3.19988		4.35603	3.32388			4.0377	0.0169501		4.03917	-0.0162423		4.03417	0.00142306
4.36323	3.1811		4.36323	3.20095		4.36323	3.32349			4.04437	0.0168607		4.04583	-0.0170097		4.04083	0.00111759
4.37043	3.18159		4.37043	3.20229		4.37043	3.32251			4.05103	0.0165626		4.0525	-0.0179932		4.0475	0.000312924
4.37763	3.18145		4.37763	3.20389		4.37763	3.32103			4.0577	0.0160784		4.05917	-0.0187084		4.05417	-0.000976026
4.38483	3.18054		4.38483	3.20575		4.38483	3.31922			4.06437	0.0155121		4.06583	-0.0188574		4.06083	-0.00251085
4.39203	3.17886		4.39203	3.20783		4.39203	3.3173			4.07103	0.0151321		4.0725	-0.0189692		4.0675	-0.00382215
4.39923	3.17663		4.39923	3.20999		4.39923	3.31552			4.0777	0.0147298		4.07917	-0.0185221		4.07417	-0.00470132
4.40643	3.17417		4.40643	3.21199		4.40643	3.31416			4.08437	0.0143871		4.08583	-0.0177398		4.08083	-0.00526756
4.41363	3.17181		4.41363	3.21364		4.41363	3.31342			4.09103	0.0139102		4.0925	-0.0165552		4.0875	-0.00501424
4.42083	3.16973		4.42083	3.21479		4.42083	3.31333			4.0977	0.0132471		4.09917	-0.0156239		4.09417	-0.00424683
4.42803	3.16803		4.42803	3.21541		4.42803	3.31372			4.10437	0.0129417		4.10583	-0.0154972		4.10083	-0.0031665
4.43523	3.16676		4.43523	3.21552		4.43523	3.31429			4.11103	0.0130087		4.1125	-0.0160486		4.1075	-0.00227988
4.44243	3.16598		4.44243	3.2152		4.44243	3.31464			4.1177	0.0134557		4.11917	-0.0168681		4.11417	-0.00152737
4.44963	3.16565		4.44963	3.21448		4.44963	3.31447			4.12437	0.0137016		4.12583	-0.0173524		4.12083	-0.000961125
4.45683	3.1656		4.45683	3.21341		4.45683	3.31352			4.13103	0.0136197		4.1325	-0.0175685		4.1275	-0.00100583
4.46403	3.16561		4.46403	3.21205		4.46403	3.31172			4.1377	0.0135675		4.13917	-0.017494		4.13417	-0.00155717
4.47123	3.16548		4.47123	3.21053		4.47123	3.3092			4.14437	0.0136942		4.14583	-0.0170767		4.14083	-0.00240654
4.47843	3.16519		4.47843	3.20893		4.47843	3.30633			4.15103	0.0140667		4.1525	-0.0164732		4.1475	-0.00326335
4.48563	3.16474		4.48563	3.20731		4.48563	3.30359			4.1577	0.0142381		4.15917	-0.0161156		4.15417	-0.00418723
4.49283	3.16418		4.49283	3.2057		4.49283	3.30135			4.16437	0.014171		4.16583	-0.0163689		4.16083	-0.00473112
4.50003	3.16347		4.50003	3.20416		4.50003	3.29981			4.17103	0.0141561		4.1725	-0.0172481		4.1675	-0.00481308
4.50723	3.16266		4.50723	3.20281		4.50723	3.29893			4.1777	0.0143126		4.17917	-0.0183731		4.17417	-0.00472367
4.51443	3.16186		4.51443	3.2018		4.51443	3.2985			4.18437	0.0146851		4.18583	-0.0194013		4.18083	-0.00502914
4.52163	3.16131		4.52163	3.20122		4.52163	3.29831			4.19103	0.0149757		4.1925	-0.0200421		4.1875	-0.00558048
4.52883	3.16123		4.52883	3.20108		4.52883	3.29813			4.1977	0.0152811		4.19917	-0.0202209		4.19417	-0.00560284
4.53603	3.16184		4.53603	3.2013		4.53603	3.29781			4.20437	0.0155717		4.20583	-0.0198632		4.20083	-0.00514835
4.54323	3.16322		4.54323	3.20174		4.54323	3.29732			4.21103	0.0157431		4.2125	-0.0192299		4.2075	-0.0044331
4.55043	3.16536		4.55043	3.20221		4.55043	3.29685			4.2177	0.0155866		4.21917	-0.0187233		4.21417	-0.00359863
4.55763	3.16817		4.55763	3.20249		4.55763	3.29675			4.22437	0.0147298		4.22583	-0.0185966		4.22083	-0.00245124
4.56483	3.17143		4.56483	3.20236		4.56483	3.29739			4.23103	0.0133663		4.2325	-0.0185296		4.2275	-0.0012666
4.57203	3.17473		4.57203	3.20178		4.57203	3.29893			4.2377	0.0123382		4.23917	-0.0181496		4.23417	-0.000707805
4.57923	3.17749		4.57923	3.20075		4.57923	3.30135			4.24437	0.0122413		4.24583	-0.0176653		4.24083	-0.000804663
4.58643	3.1791		4.58643	3.19932		4.58643	3.30439			4.25103	0.0128672		4.2525	-0.0170916		4.2475	-0.000871718
4.59363	3.17917		4.59363	3.19757		4.59363	3.30774			4.2577	0.0135899		4.25917	-0.0165254		4.25417	-0.00051409
4.60083	3.1776		4.60083	3.19567		4.60083	3.31109			4.26437	0.0144541		4.26583	-0.0158772		4.26083	-2.23517e-05
4.60803	3.17459		4.60803	3.19384		4.60803	3.31405			4.27103	0.0156239		4.2725	-0.0156388		4.2675	0.000365078
4.61523	3.17059		4.61523	3.19227		4.61523	3.31628			4.2777	0.0164732		4.27917	-0.015974		4.27417	0.00037998
4.62243	3.16619		4.62243	3.19105		4.62243	3.31753			4.28437	0.0166669		4.28583	-0.0165552		4.28083	0.000350177
4.62963	3.16214		4.62963	3.19017		4.62963	3.31779			4.29103	0.0162423		4.2925	-0.0169277		4.2875	0.000141561
4.63683	3.15915		4.63683	3.18954		4.63683	3.31715			4.2977	0.0158027		4.29917	-0.0170767		4.29417	-2.98023e-05
4.64403	3.15773		4.64403	3.18915		4.64403	3.31581			4.30437	0.0154004		4.30583	-0.0174269		4.30083	-8.19564e-05
4.65123	3.15802		4.65123	3.18894		4.65123	3.31393			4.31103	0.0147372		4.3125	-0.0177249		4.3075	0.000230968
4.65843	3.15977		4.65843	3.18885		4.65843	3.31166			4.3177	0.0139475		4.31917	-0.0178218		4.31417	0.00105053
4.66563	3.1625		4.66563	3.18879		4.66563	3.30915			4.32437	0.0133589		4.32583	-0.0176951		4.32083	0.00171363
4.67283	3.1656		4.67283	3.18874		4.67283	3.30662			4.33103	0.0134259		4.3325	-0.0181347		4.3275	0.00170618
4.68003	3.16844		4.68003	3.18878		4.68003	3.30431			4.3377	0.0138581		4.33917	-0.0190139		4.33417	0.00106543
4.68723	3.17052		4.68723	3.18902		4.68723	3.30245			4.34437	0.0141338		4.34583	-0.0196844		4.34083	0.000350177
4.69443	3.17158		4.69443	3.18948		4.69443	3.3012			4.35103	0.0143275		4.3525	-0.020206		4.3475	-0.000149012
4.70163	3.17167		4.70163	3.19012		4.70163	3.30059			4.3577	0.0148565		4.35917	-0.0206083		4.35417	-0.000335276
4.70883	3.17111		4.70883	3.19091		4.70883	3.3005			4.36437	0.0153184		4.36583	-0.0210628		4.36083	-0.000245869
4.71603	3.17034		4.71603	3.19182		4.71603	3.30074			4.37103	0.0149682		4.3725	-0.0210628		4.3675	0.000201166
4.72323	3.16975		4.72323	3.19277		4.72323	3.30108			4.3777	0.0140816		4.37917	-0.0204444		4.37417	0.000678003
4.73043	3.16955		4.73043	3.19362		4.73043	3.30127			4.38437	0.0132844		4.38583	-0.0197515		4.38083	0.00112504
4.73763	3.16977		4.73763	3.19417		4.73763	3.30114			4.39103	0.0130013		4.3925	-0.0188351		4.3875	0.00128895
4.74483	3.17032		4.74483	3.19432		4.74483	3.30062			4.3977	0.0125095		4.39917	-0.0183284		4.39417	0.00090152
4.75203	3.17109		4.75203	3.19409		4.75203	3.29973			4.40437	0.0119433		4.40583	-0.0179186		4.40083	0
4.75923	3.17187		4.75923	3.19358		4.75923	3.29869			4.41103	0.0117719		4.4125	-0.0174865		4.4075	-0.00120699
4.76643	3.1725		4.76643	3.19282		4.76643	3.29773			4.4177	0.0117421		4.41917	-0.0169873		4.41417	-0.00201166
4.77363	3.17287		4.77363	3.19183		4.77363	3.29704			4.42437	0.0117496		4.42583	-0.0165999		4.42083	-0.00284612
4.78083	3.17307		4.78083	3.19063		4.78083	3.29665			4.43103	0.0116006		4.4325	-0.0168309		4.4275	-0.00368059
4.78803	3.17322		4.78803	3.18926		4.78803	3.29651			4.4377	0.0116974		4.43917	-0.017114		4.43417	-0.00433624
4.79523	3.17348		4.79523	3.18789		4.79523	3.29645			4.44437	0.0120401		4.44583	-0.017494		4.44083	-0.00423938
4.80243	3.17385		4.80243	3.18676		4.80243	3.29629			4.45103	0.012815		4.4525	-0.0179037		4.4475	-0.00344962
4.80963	3.17422		4.80963	3.1861		4.80963	3.29581			4.4577	0.014171		4.45917	-0.0186563		4.45417	-0.00289828
4.81683	3.17439		4.81683	3.18606		4.81683	3.29493			4.46437	0.0156686		4.46583	-0.0195056		4.46083	-0.0025183
4.82403	3.17423		4.82403	3.18671		4.82403	3.2937			4.47103	0.0165254		4.4725	-0.0199974		4.4675	-0.00224262
4.83123	3.17368		4.83123	3.18813		4.83123	3.29242			4.4777	0.0165924		4.47917	-0.0202134		4.47417	-0.00181049
4.83843	3.17277		4.83843	3.19028		4.83843	3.29146			4.48437	0.0163466		4.48583	-0.0202432		4.48083	-0.0012666
4.84563	3.17161		4.84563	3.19306		4.84563	3.2911			4.49103	0.0158325		4.4925	-0.0200421		4.4875	-0.00076741
4.85283	3.17044		4.85283	3.19619		4.85283	3.29152			4.4977	0.0151098		4.49917	-0.019528		4.49417	-0.000245869
4.86003	3.16949		4.86003	3.19933		4.86003	3.29282			4.50437	0.0143796		4.50583	-0.0186637		4.50083	-0.000216067
4.86723	3.16901		4.86723	3.20215		4.86723	3.29505			4.51103	0.0140071		4.5125	-0.017941		4.5075	-0.000722706
4.87443	3.1691		4.87443	3.20451		4.87443	3.2981			4.5177	0.0139251		4.51917	-0.0175908		4.51417	-0.00136346
4.88163	3.1697		4.88163	3.20638		4.88163	3.30169			4.52437	0.0140741		4.52583	-0.0177547		4.52083	-0.0019446
4.88883	3.17068		4.88883	3.20784		4.88883	3.30542			4.53103	0.0144988		4.5325	-0.0185668		4.5275	-0.00233203
4.89603	3.17184		4.89603	3.20896		4.89603	3.30892			4.5377	0.0148863		4.53917	-0.0198931		4.53417	-0.00263005
4.90323	3.17302		4.90323	3.20981		4.90323	3.31192			4.54437	0.0150874		4.54583	-0.0214726		4.54083	-0.00251085
4.91043	3.17405		4.91043	3.21045		4.91043	3.3143			4.55103	0.0153407		4.5525	-0.0227541		4.5475	-0.00168383
4.91763	3.17481		4.91763	3.21096		4.91763	3.31595			4.5577	0.0158101		4.55917	-0.0234842		4.55417	-0.000722706
4.92483	3.17521		4.92483	3.2113		4.92483	3.31677			4.56437	0.0160635		4.56583	-0.0236407		4.56083	-7.45058e-06
4.93203	3.17526		4.93203	3.21143		4.93203	3.3167			4.57103	0.0156164		4.5725	-0.0236481		4.5675	0.000171363
4.93923	3.17496		4.93923	3.21117		4.93923	3.3158			4.5777	0.0149086		4.57917	-0.0235885		4.57417	0.000149012
4.94643	3.17432		4.94643	3.2104		4.94643	3.31423			4.58437	0.0142455		4.58583	-0.0234544		4.58083	0.000372529
4.95363	3.17333		4.95363	3.20908		4.95363	3.31225			4.59103	0.0134856		4.5925	-0.0231043		4.5875	0.000603497
4.96083	3.17204		4.96083	3.20724		4.96083	3.3102			4.5977	0.0126362		4.59917	-0.0223517		4.59417	0.00076741
4.96803	3.1706		4.96803	3.20505		4.96803	3.30843			4.60437	0.0120848		4.60583	-0.0213087		4.60083	0.000648201
4.97523	3.16925		4.97523	3.20268		4.97523	3.30734			4.61103	0.0123233		4.6125	-0.0201985		4.6075	0.000417233
4.98243	3.16827		4.98243	3.20035		4.98243	3.30717			4.6177	0.0128746		4.61917	-0.0190735		4.61417	0.000275671
4.98963	3.16794		4.98963	3.1983		4.98963	3.30797			4.62437	0.0131205		4.62583	-0.017792		4.62083	-0.000216067
4.99683	3.1684		4.99683	3.19679		4.99683	3.30953			4.63103	0.0128746		4.6325	-0.0166073		4.6275	-0.000849366
5.00403	3.16969		5.00403	3.19607		5.00403	3.31151			4.6377	0.0123754		4.63917	-0.0161007		4.63417	-0.00147521
5.01123	3.17161		5.01123	3.19632		5.01123	3.31346			4.64437	0.0121295		4.64583	-0.016652		4.64083	-0.00183284
5.01843	3.17379		5.01843	3.1976		5.01843	3.31482			4.65103	0.0120401		4.6525	-0.0174567		4.6475	-0.00189245
5.02563	3.17575		5.02563	3.19982		5.02563	3.3151			4.6577	0.0122488		4.65917	-0.0179708		4.65417	-0.00180304
5.03283	3.17705		5.03283	3.20284		5.03283	3.31401			4.66437	0.0129417		4.66583	-0.0183135		4.66083	-0.00138581
5.04003	3.17738		5.04003	3.20641		5.04003	3.31156			4.67103	0.0141189		4.6725	-0.0188723		4.6675	-0.000983477
5.04723	3.1767		5.04723	3.21026		5.04723	3.30808			4.6777	0.0153705		4.67917	-0.0196025		4.67417	-0.000923872
5.05443	3.17514		5.05443	3.21398		5.05443	3.30417			4.68437	0.0158101		4.68583	-0.0201017		4.68083	-0.00116974
5.06163	3.17305		5.06163	3.21712		5.06163	3.30046			4.69103	0.0156164		4.6925	-0.0202209		4.6875	-0.00145286
5.06883	3.17088		5.06883	3.21928		5.06883	3.29754			4.6977	0.0149831		4.69917	-0.0203699		4.69417	-0.00160187
5.07603	3.16913		5.07603	3.22016		5.07603	3.29588			4.70437	0.0141859		4.70583	-0.0206232		4.70083	-0.00164658
5.08323	3.16817		5.08323	3.21962		5.08323	3.29571			4.71103	0.0134259		4.7125	-0.020951		4.7075	-0.00172108
5.09043	3.16817		5.09043	3.21772		5.09043	3.29701			4.7177	0.0131577		4.71917	-0.0210702		4.71417	-0.00184029
5.09763	3.16902		5.09763	3.2147		5.09763	3.29952			4.72437	0.0133067		4.72583	-0.0208765		4.72083	-0.00215322
5.10483	3.17044		5.10483	3.21102		5.10483	3.30281			4.73103	0.0134706		4.7325	-0.0206977		4.7275	-0.0025332
5.11203	3.17202		5.11203	3.20725		5.11203	3.30644			4.7377	0.013575		4.73917	-0.0207499		4.73417	-0.00301749
5.11923	3.17342		5.11923	3.20393		5.11923	3.30998			4.74437	0.0140667		4.74583	-0.0211447		4.74083	-0.00376254
5.12643	3.17441		5.12643	3.20149		5.12643	3.31303			4.75103	0.0146255		4.7525	-0.0215098		4.7475	-0.00464916
5.13363	3.1749		5.13363	3.20015		5.13363	3.31537			4.7577	0.0145584		4.75917	-0.0215769		4.75417	-0.00536442
5.14083	3.17498		5.14083	3.19999		5.14083	3.3169			4.76437	0.0142679		4.76583	-0.0215769		4.76083	-0.00545382
5.14803	3.17488		5.14803	3.20092		5.14803	3.31765			4.77103	0.0143945		4.7725	-0.0215396		4.7675	-0.005126
5.15523	3.17485		5.15523	3.20262		5.15523	3.31764			4.7777	0.0150874		4.77917	-0.0212789		4.77417	-0.00452995
5.16243	3.17504		5.16243	3.20463		5.16243	3.31687			4.78437	0.0155643		4.78583	-0.0206679		4.78083	-0.00368059
5.16963	3.17553		5.16963	3.2065		5.16963	3.31535			4.79103	0.0154749		4.7925	-0.0199676		4.7875	-0.00275671
5.17683	3.17622		5.17683	3.20796		5.17683	3.31317			4.7977	0.0149384		4.79917	-0.0194684		4.79417	-0.00192225
5.18403	3.17701		5.18403	3.20898		5.18403	3.31051			4.80437	0.0144541		4.80583	-0.0186488		4.80083	-0.00137836
5.19123	3.17767		5.19123	3.2096		5.19123	3.30761			4.81103	0.0140145		4.8125	-0.0177026		4.8075	-0.00131875
5.19843	3.17807		5.19843	3.2099		5.19843	3.30475			4.8177	0.0134706		4.81917	-0.0171661		4.81417	-0.00190735
5.20563	3.17818		5.20563	3.20991		5.20563	3.30218			4.82437	0.0128374		4.82583	-0.0175014		4.82083	-0.00295788
5.21283	3.17819		5.21283	3.20971		5.21283	3.30022			4.83103	0.0128075		4.8325	-0.0182837		4.8275	-0.00374764
5.22003	3.17839		5.22003	3.20942		5.22003	3.29914			4.8377	0.0136867		4.83917	-0.0188872		4.83417	-0.00368804
5.22723	3.17905		5.22723	3.20916		5.22723	3.29909			4.84437	0.014618		4.84583	-0.0193194		4.84083	-0.0031963
5.23443	3.18025		5.23443	3.20897		5.23443	3.30001			4.85103	0.015229		4.8525	-0.0197887		4.8475	-0.00284612
5.24163	3.18186		5.24163	3.2088		5.24163	3.30159			4.8577	0.0153482		4.85917	-0.0200719		4.85417	-0.00273436
5.24883	3.1836		5.24883	3.20859		5.24883	3.30346			4.86437	0.0152513		4.86583	-0.0201017		4.86083	-0.00257045
5.25603	3.18515		5.25603	3.2083		5.25603	3.30523			4.87103	0.0148937		4.8725	-0.0199825		4.8675	-0.00236928
5.26323	3.18614		5.26323	3.20799		5.26323	3.30662			4.8777	0.0148341		4.87917	-0.0198931		4.87417	-0.00236183
5.27043	3.18626		5.27043	3.2077		5.27043	3.30752			4.88437	0.0154376		4.88583	-0.0200868		4.88083	-0.002563
5.27763	3.18538		5.27763	3.20742		5.27763	3.3079			4.89103	0.0163242		4.8925	-0.0203252		4.8875	-0.0025928
5.28483	3.18362		5.28483	3.20706		5.28483	3.30786			4.8977	0.0173151		4.89917	-0.0205562		4.89417	-0.00220537
5.29203	3.18145		5.29203	3.20652		5.29203	3.30757			4.90437	0.0185519		4.90583	-0.0204146		4.90083	-0.00146776
5.29923	3.17943		5.29923	3.20573		5.29923	3.30725			4.91103	0.0198707		4.9125	-0.0202432		4.9075	-0.000968575
5.30643	3.17805		5.30643	3.20472		5.30643	3.3071			4.9177	0.0202805		4.91917	-0.020206		4.91417	-0.00113249
5.31363	3.17763		5.31363	3.20354		5.31363	3.30718			4.92437	0.019446		4.92583	-0.019908		4.92083	-0.00164658
5.32083	3.17825		5.32083	3.2023		5.32083	3.30738			4.93103	0.0181571		4.9325	-0.0194684		4.9275	-0.00201911
5.32803	3.17978		5.32803	3.20107		5.32803	3.30756			4.9377	0.0170022		4.93917	-0.0192299		4.93417	-0.00213087
5.33523	3.18198		5.33523	3.19993		5.33523	3.30756			4.94437	0.016205		4.94583	-0.0192448		4.94083	-0.00211596
5.34243	3.1844		5.34243	3.19899		5.34243	3.3074			4.95103	0.0155047		4.9525	-0.0188872		4.9475	-0.00207126
5.34963	3.18652		5.34963	3.19836		5.34963	3.3072			4.9577	0.0148714		4.95917	-0.0182688		4.95417	-0.00207871
5.35683	3.18789		5.35683	3.19807		5.35683	3.3071			4.96437	0.0144318		4.96583	-0.018172		4.96083	-0.00200421
5.36403	3.18821		5.36403	3.19803		5.36403	3.30722			4.97103	0.0141263		4.9725	-0.0186041		4.9675	-0.00219792
5.37123	3.18737		5.37123	3.19815		5.37123	3.30777			4.9777	0.0141934		4.97917	-0.018917		4.97417	-0.0025928
5.37843	3.18541		5.37843	3.19836		5.37843	3.30889			4.98437	0.01432		4.98583	-0.0190288		4.98083	-0.00292808
5.38563	3.18249		5.38563	3.19862		5.38563	3.31066			4.99103	0.0144392		4.9925	-0.0190884		4.9875	-0.00243634
5.39283	3.17888		5.39283	3.19894		5.39283	3.31287			4.9977	0.0144094		4.99917	-0.019066		4.99417	-0.0013113
5.40003	3.17491		5.40003	3.19932		5.40003	3.3151			5.00437	0.0141934		5.00583	-0.0191033		5.00083	-0.000506639
5.40723	3.17091		5.40723	3.19977		5.40723	3.31686			5.01103	0.0140816		5.0125	-0.0189692		5.0075	-0.00025332
5.41443	3.16724		5.41443	3.2004		5.41443	3.31778			5.0177	0.0138879		5.01917	-0.018917		5.01417	-0.000171363
5.42163	3.16421		5.42163	3.20137		5.42163	3.31767			5.02437	0.0135228		5.02583	-0.0185892		5.02083	5.96046e-05
5.42883	3.16209		5.42883	3.20274		5.42883	3.31655			5.03103	0.012897		5.0325	-0.0182465		5.0275	-0.000268221
5.43603	3.16095		5.43603	3.20444		5.43603	3.31448			5.0377	0.0127032		5.03917	-0.018172		5.03417	-0.00111014
5.44323	3.1607		5.44323	3.20625		5.44323	3.31169			5.04437	0.0133067		5.04583	-0.0184029		5.04083	-0.00163913
5.45043	3.16103		5.45043	3.20796		5.45043	3.30858			5.05103	0.0140443		5.0525	-0.0191256		5.0475	-0.00119954
5.45763	3.16162		5.45763	3.20941		5.45763	3.3056			5.0577	0.0145808		5.05917	-0.0199378		5.05417	-0.000596046
5.46483	3.16225		5.46483	3.21044		5.46483	3.30322			5.06437	0.0146255		5.06583	-0.020735		5.06083	-0.000685453
5.47204	3.16279		5.47204	3.21083		5.47204	3.30165			5.07103	0.0146106		5.0725	-0.0214428		5.0675	-0.00144541
5.47924	3.16318		5.47924	3.21044		5.47924	3.30086			5.0777	0.0147596		5.07917	-0.0221431		5.07417	-0.00227988
5.48644	3.16345		5.48644	3.20929		5.48644	3.30063			5.08437	0.0151321		5.08583	-0.0222549		5.08083	-0.00304729
5.49364	3.16368		5.49364	3.20765		5.49364	3.3008			5.09103	0.0156537		5.0925	-0.021711		5.0875	-0.00385195
5.50084	3.16406		5.50084	3.20586		5.50084	3.30133			5.0977	0.0157952		5.09917	-0.0207275		5.09417	-0.00412762
5.50804	3.16476		5.50804	3.2042		5.50804	3.30223			5.10437	0.0158697		5.10583	-0.0200197		5.10083	-0.00399351
5.51524	3.1658		5.51524	3.20289		5.51524	3.30345			5.11103	0.0161305		5.1125	-0.0198334		5.1075	-0.00342727
5.52244	3.16699		5.52244	3.20203		5.52244	3.30488			5.1177	0.0161454		5.11917	-0.020124		5.11417	-0.00281632
5.52964	3.16802		5.52964	3.20175		5.52964	3.30644			5.12437	0.0155494		5.12583	-0.0206456		5.12083	-0.00263751
5.53684	3.16866		5.53684	3.20211		5.53684	3.30813			5.13103	0.014618		5.1325	-0.0209808		5.1275	-0.00327826
5.54404	3.16879		5.54404	3.20302		5.54404	3.30997			5.1377	0.0137538		5.13917	-0.0211		5.13417	-0.00468642
5.55124	3.16842		5.55124	3.20426		5.55124	3.31181			5.14437	0.0129566		5.14583	-0.0211447		5.14083	-0.00596792
5.55844	3.16774		5.55844	3.2056		5.55844	3.31337			5.15103	0.0118762		5.1525	-0.021264		5.1475	-0.00680238
5.56564	3.16696		5.56564	3.20687		5.56564	3.3143			5.1577	0.0111461		5.15917	-0.0210106		5.15417	-0.0070706
5.57284	3.16637		5.57284	3.208		5.57284	3.31444			5.16437	0.0113323		5.16583	-0.0204667		5.16083	-0.00660121
5.58004	3.16624		5.58004	3.209		5.58004	3.31379			5.17103	0.0120625		5.1725	-0.0201613		5.1675	-0.00535697
5.58724	3.16676		5.58724	3.20991		5.58724	3.3125			5.1777	0.0130981		5.17917	-0.0205562		5.17417	-0.00421703
5.59444	3.16798		5.59444	3.21079		5.59444	3.31075			5.18437	0.0141636		5.18583	-0.0212565		5.18083	-0.00369549
5.60164	3.16979		5.60164	3.21171		5.60164	3.30876			5.19103	0.0156462		5.1925	-0.0214949		5.1875	-0.00366569
5.60884	3.17203		5.60884	3.21277		5.60884	3.30679			5.1977	0.0169054		5.19917	-0.0214428		5.19417	-0.00361353
5.61604	3.1745		5.61604	3.21404		5.61604	3.30515			5.20437	0.0171214		5.20583	-0.0214502		5.20083	-0.00333786
5.62324	3.17698		5.62324	3.21553		5.62324	3.30406			5.21103	0.0164956		5.2125	-0.0215694		5.2075	-0.00274181
5.63044	3.17929		5.63044	3.217		5.63044	3.30357			5.2177	0.0157207		5.21917	-0.0214279		5.21417	-0.00160933
5.63764	3.18129		5.63764	3.21816		5.63764	3.30361			5.22437	0.0153482		5.22583	-0.0209734		5.22083	-0.000216067
5.64484	3.18297		5.64484	3.21875		5.64484	3.30398			5.23103	0.0152364		5.2325	-0.0207126		5.2275	0.00111014
5.65204	3.18434		5.65204	3.21869		5.65204	3.30449			5.2377	0.0151545		5.23917	-0.0212044		5.23417	0.00204146
5.65924	3.18546		5.65924	3.21815		5.65924	3.30489			5.24437	0.0153929		5.24583	-0.0222698		5.24083	0.00245124
5.66644	3.18632		5.66644	3.21736		5.66644	3.305			5.25103	0.0156984		5.2525	-0.0232607		5.2475	0.0019744
5.67364	3.18685		5.67364	3.21655		5.67364	3.30467			5.2577	0.0159442		5.25917	-0.0238866		5.25417	0.000700355
5.68084	3.18694		5.68084	3.21597		5.68084	3.30386			5.26437	0.0159815		5.26583	-0.0247359		5.26083	-0.000670552
5.68804	3.18648		5.68804	3.21583		5.68804	3.30263			5.27103	0.0157431		5.2725	-0.0257343		5.2675	-0.00163913
5.69524	3.18536		5.69524	3.21625		5.69524	3.30113			5.2777	0.0156388		5.27917	-0.0262484		5.27417	-0.00263751
5.70244	3.18349		5.70244	3.21708		5.70244	3.29952			5.28437	0.0156909		5.28583	-0.0261515		5.28083	-0.00371039
5.70964	3.18076		5.70964	3.21788		5.70964	3.29797			5.29103	0.0158995		5.2925	-0.0259355		5.2875	-0.00451505
5.71684	3.17718		5.71684	3.21811		5.71684	3.29661			5.2977	0.015907		5.29917	-0.0259727		5.29417	-0.00440329
5.72404	3.1729		5.72404	3.21735		5.72404	3.29548			5.30437	0.0156462		5.30583	-0.0254884		5.30083	-0.00359863
5.73124	3.16823		5.73124	3.21548		5.73124	3.29459			5.31103	0.0154525		5.3125	-0.0246838		5.3075	-0.00263005
5.73844	3.16359		5.73844	3.21262		5.73844	3.29385			5.3177	0.0152513		5.31917	-0.0241026		5.31417	-0.00172108
5.74564	3.15942		5.74564	3.20914		5.74564	3.29313			5.32437	0.0149608		5.32583	-0.0237823		5.32083	-0.00106543
5.75284	3.15607		5.75284	3.20554		5.75284	3.29241			5.33103	0.0145435		5.3325	-0.0234246		5.3275	-0.000625849
5.76004	3.15379		5.76004	3.20242		5.76004	3.2916			5.3377	0.0143647		5.33917	-0.0226945		5.33417	-0.000558794
5.76724	3.15267		5.76724	3.20035		5.76724	3.29067			5.34437	0.0145361		5.34583	-0.02224		5.34083	-0.000923872
5.77444	3.15263		5.77444	3.19969		5.77444	3.28957			5.35103	0.0146627		5.3525	-0.0222251		5.3475	-0.0018999
5.78164	3.15346		5.78164	3.20041		5.78164	3.28826			5.3577	0.0145882		5.35917	-0.0221059		5.35417	-0.00283122
5.78884	3.15489		5.78884	3.20218		5.78884	3.28679			5.36437	0.0142828		5.36583	-0.02148		5.36083	-0.00343472
5.79604	3.15664		5.79604	3.20444		5.79604	3.28532			5.37103	0.014022		5.3725	-0.0205487		5.3675	-0.00347197
5.80324	3.15851		5.80324	3.20657		5.80324	3.284			5.3777	0.0134706		5.37917	-0.0199825		5.37417	-0.00343472
5.81044	3.16036		5.81044	3.20813		5.81044	3.28289			5.38437	0.0124127		5.38583	-0.019677		5.38083	-0.00342727
5.81764	3.16209		5.81764	3.20873		5.81764	3.28208			5.39103	0.0113919		5.3925	-0.0190958		5.3875	-0.00313669
5.82484	3.1637		5.82484	3.20824		5.82484	3.28172			5.3977	0.0111163		5.39917	-0.0182316		5.39417	-0.00283122
5.83204	3.1652		5.83204	3.20675		5.83204	3.28208			5.40437	0.0116378		5.40583	-0.0178739		5.40083	-0.0025779
5.83924	3.1666		5.83924	3.20453		5.83924	3.28336			5.41103	0.0124946		5.4125	-0.0180155		5.4075	-0.00291318
5.84644	3.16784		5.84644	3.202		5.84644	3.28562			5.4177	0.0133812		5.41917	-0.0183433		5.41417	-0.00318885
5.85364	3.1688		5.85364	3.19955		5.85364	3.28866			5.42437	0.0145212		5.42583	-0.018537		5.42083	-0.00312179
5.86084	3.16935		5.86084	3.19747		5.86084	3.29221			5.43103	0.0154302		5.4325	-0.0188947		5.4275	-0.00270456
5.86804	3.16938		5.86804	3.1959		5.86804	3.29601			5.4377	0.0153482		5.43917	-0.0195652		5.43417	-0.00216067
5.87524	3.1689		5.87524	3.19484		5.87524	3.29975			5.44437	0.0145435		5.44583	-0.0203401		5.44083	-0.0019297
5.88244	3.16809		5.88244	3.19428		5.88244	3.30318			5.45103	0.0135899		5.4525	-0.0209957		5.4475	-0.00168383
5.88964	3.16713		5.88964	3.19422		5.88964	3.30601			5.4577	0.0132993		5.45917	-0.0213459		5.45417	-0.00156462
5.89684	3.16628		5.89684	3.19458		5.89684	3.30806			5.46437	0.0134557		5.46583	-0.0213757		5.46083	-0.00160187
5.90404	3.16567		5.90404	3.19515		5.90404	3.30925			5.47103	0.0138134		5.4725	-0.0210106		5.4675	-0.00233203
5.91124	3.16545		5.91124	3.19568		5.91124	3.30966			5.4777	0.0144169		5.47917	-0.0201315		5.47417	-0.00376254
5.91844	3.16576		5.91844	3.19598		5.91844	3.30945			5.48437	0.0148714		5.48583	-0.0188053		5.48083	-0.00514835
5.92564	3.16671		5.92564	3.19601		5.92564	3.30874			5.49103	0.0153482		5.4925	-0.0180006		5.4875	-0.00600517
5.93284	3.16834		5.93284	3.1958		5.93284	3.30763			5.4977	0.0158325		5.49917	-0.0181571		5.49417	-0.00656396
5.94004	3.17057		5.94004	3.19536		5.94004	3.3061			5.50437	0.0164211		5.50583	-0.0188649		5.50083	-0.00712276
5.94724	3.17327		5.94724	3.19466		5.94724	3.30412			5.51103	0.0168532		5.5125	-0.0194833		5.5075	-0.00723451
5.95444	3.17622		5.95444	3.19377		5.95444	3.3017			5.5177	0.0168905		5.51917	-0.020206		5.51417	-0.00645965
5.96164	3.17926		5.96164	3.1929		5.96164	3.29897			5.52437	0.0168905		5.52583	-0.0211224		5.52083	-0.00523776
5.96884	3.18224		5.96884	3.19241		5.96884	3.29611			5.53103	0.0165999		5.5325	-0.0216663		5.5275	-0.0045225
5.97604	3.18501		5.97604	3.19263		5.97604	3.29338			5.5377	0.0158176		5.53917	-0.0213757		5.53417	-0.00436604
5.98324	3.18736		5.98324	3.19374		5.98324	3.29103			5.54437	0.0148714		5.54583	-0.0206381		5.54083	-0.00442564
5.99044	3.18912		5.99044	3.19575		5.99044	3.28933			5.55103	0.0144318		5.5525	-0.0200123		5.5475	-0.0044331
5.99764	3.19022		5.99764	3.19857		5.99764	3.28835			5.5577	0.0146404		5.55917	-0.0196323		5.55417	-0.00465661
6.00484	3.19073		6.00484	3.20202		6.00484	3.28797			5.56437	0.0151172		5.56583	-0.0195205		5.56083	-0.00488758
6.01204	3.1908		6.01204	3.20582		6.01204	3.28797			5.57103	0.0157282		5.5725	-0.019446		5.5675	-0.00483543
6.01924	3.19064		6.01924	3.20963		6.01924	3.2881			5.5777	0.0162944		5.57917	-0.0193939		5.57417	-0.00456721
6.02644	3.19041		6.02644	3.21305		6.02644	3.28819			5.58437	0.0162795		5.58583	-0.0195801		5.58083	-0.00451505
6.03364	3.19027		6.03364	3.21578		6.03364	3.28815			5.59103	0.0156388		5.5925	-0.0200942		5.5875	-0.00485033
6.04084	3.19024		6.04084	3.21759		6.04084	3.28794			5.5977	0.0151023		5.59917	-0.0205636		5.59417	-0.00490993
6.04804	3.19026		6.04804	3.21838		6.04804	3.28758			5.60437	0.0150129		5.60583	-0.0207648		5.60083	-0.0044927
6.05524	3.19021		6.05524	3.21817		6.05524	3.28728			5.61103	0.0148937		5.6125	-0.0204146		5.6075	-0.00358373
6.06244	3.18994		6.06244	3.21712		6.06244	3.28738			5.6177	0.0144318		5.61917	-0.0201017		5.61417	-0.00264496
6.06964	3.18934		6.06964	3.21545		6.06964	3.28816			5.62437	0.0142381		5.62583	-0.0199303		5.62083	-0.00201911
6.07684	3.18829		6.07684	3.21332		6.07684	3.28969			5.63103	0.014782		5.6325	-0.0202209		5.6275	-0.00143051
6.08404	3.18671		6.08404	3.21091		6.08404	3.29179			5.6377	0.0157282		5.63917	-0.0210181		5.63417	-0.00110269
6.09124	3.18461		6.09124	3.20837		6.09124	3.29424			5.64437	0.0164807		5.64583	-0.0221059		5.64083	-0.00122935
6.09844	3.18217		6.09844	3.20592		6.09844	3.29682			5.65103	0.0172928		5.6525	-0.023745		5.6475	-0.0019595
6.10564	3.17965		6.10564	3.20379		6.10564	3.29942			5.6577	0.0181198		5.65917	-0.0251979		5.65417	-0.00268221
6.11284	3.17727		6.11284	3.20219		6.11284	3.30189			5.66437	0.0186861		5.66583	-0.0260994		5.66083	-0.00275671
6.12004	3.17512		6.12004	3.2012		6.12004	3.30404			5.67103	0.0186488		5.6725	-0.0260696		5.6675	-0.00291318
6.12724	3.17319		6.12724	3.20087		6.12724	3.3057			5.6777	0.0179633		5.67917	-0.0253543		5.67417	-0.00340492
6.13444	3.17149		6.13444	3.20119		6.13444	3.30678			5.68437	0.0172034		5.68583	-0.0242591		5.68083	-0.00400841
6.14164	3.17007		6.14164	3.20218		6.14164	3.30734			5.69103	0.0166893		5.6925	-0.0230223		5.6875	-0.00408292
6.14884	3.16898		6.14884	3.20378		6.14884	3.30747			5.6977	0.0166818		5.69917	-0.02186		5.69417	-0.0038892
6.15604	3.16815		6.15604	3.2059		6.15604	3.30732			5.70437	0.0170916		5.70583	-0.0210181		5.70083	-0.00376254
6.16324	3.16755		6.16324	3.20835		6.16324	3.307			5.71103	0.0175089		5.7125	-0.0204816		5.7075	-0.00317395
6.17044	3.16713		6.17044	3.21093		6.17044	3.30666			5.7177	0.0179037		5.71917	-0.0200346		5.71417	-0.00231713
6.17764	3.16697		6.17764	3.2135		6.17764	3.30639			5.72437	0.0182241		5.72583	-0.0196546		5.72083	-0.00149012
6.18484	3.16721		6.18484	3.21593		6.18484	3.30629			5.73103	0.0183508		5.7325	-0.0194609		5.7275	-0.0012666
6.19204	3.16792		6.19204	3.21805		6.19204	3.30637			5.7377	0.0179186		5.73917	-0.0196546		5.73417	-0.00157207
6.19924	3.1691		6.19924	3.21973		6.19924	3.30666			5.74437	0.0169128		5.74583	-0.0202432		5.74083	-0.00207126
6.20644	3.17067		6.20644	3.22087		6.20644	3.30707			5.75103	0.0160187		5.7525	-0.0209436		5.7475	-0.00278652
6.21364	3.1725		6.21364	3.2214		6.21364	3.30752			5.7577	0.0155196		5.75917	-0.0218898		5.75417	-0.0031814
6.22084	3.17447		6.22084	3.22124		6.22084	3.30787			5.76437	0.0151992		5.76583	-0.0229552		5.76083	-0.00313669
6.22804	3.17652		6.22804	3.22031		6.22804	3.30808			5.77103	0.0150427		5.7725	-0.0237375		5.7675	-0.00243634
6.23524	3.17858		6.23524	3.21863		6.23524	3.30821			5.7777	0.015527		5.77917	-0.0241026		5.77417	-0.00136346
6.24244	3.18058		6.24244	3.21634		6.24244	3.30843			5.78437	0.016503		5.78583	-0.024125		5.78083	-0.000298023
6.24964	3.18239		6.24964	3.21378		6.24964	3.30887			5.79103	0.0170916		5.7925	-0.0241771		5.7875	0.000372529
6.25684	3.18391		6.25684	3.21118		6.25684	3.30962			5.7977	0.0169873		5.79917	-0.0240877		5.79417	0.000432134
6.26404	3.18514		6.26404	3.20879		6.26404	3.31065			5.80437	0.0164509		5.80583	-0.0237003		5.80083	-0.000111759
6.27124	3.18614		6.27124	3.20675		6.27124	3.3119			5.81103	0.0159591		5.8125	-0.023298		5.8075	-0.0012517
6.27844	3.18699		6.27844	3.20528		6.27844	3.3133			5.8177	0.0154823		5.81917	-0.0231415		5.81417	-0.00242144
6.28564	3.18767		6.28564	3.2046		6.28564	3.31486			5.82437	0.0150353		5.82583	-0.0231862		5.82083	-0.00339001
6.29284	3.18807		6.29284	3.20473		6.29284	3.31659			5.83103	0.0148788		5.8325	-0.0230148		5.8275	-0.00377744
6.30004	3.18806		6.30004	3.20548		6.30004	3.31859			5.8377	0.0152811		5.83917	-0.0226274		5.83417	-0.00392646
6.30724	3.18763		6.30724	3.2065		6.30724	3.32094			5.84437	0.0161752		5.84583	-0.0222549		5.84083	-0.00368804
6.31444	3.18685		6.31444	3.20751		6.31444	3.32366			5.85103	0.0169799		5.8525	-0.0220612		5.8475	-0.00306219
6.32164	3.1858		6.32164	3.20836		6.32164	3.32662			5.8577	0.0175834		5.85917	-0.02186		5.85417	-0.00242889
6.32884	3.1845		6.32884	3.20894		6.32884	3.32958			5.86437	0.0178665		5.86583	-0.0213385		5.86083	-0.00166148
6.33604	3.183		6.33604	3.20908		6.33604	3.33215			5.87103	0.0178292		5.8725	-0.0206903		5.8675	-0.000916421
6.34324	3.18134		6.34324	3.20861		6.34324	3.33387			5.8777	0.0170395		5.87917	-0.0201911		5.87417	0.000342727
6.35044	3.17972		6.35044	3.20748		6.35044	3.33423			5.88437	0.0160635		5.88583	-0.0200123		5.88083	0.00114739
6.35764	3.17829		6.35764	3.20584		6.35764	3.33282			5.89103	0.0149757		5.8925	-0.0199601		5.8875	0.00114739
6.36484	3.17715		6.36484	3.20393		6.36484	3.32943			5.8977	0.013493		5.89917	-0.0199229		5.89417	0.000551343
6.37204	3.17627		6.37204	3.202		6.37204	3.32425			5.90437	0.0119135		5.90583	-0.0199378		5.90083	-7.45058e-05
6.37924	3.17557		6.37924	3.20021		6.37924	3.31779			5.91103	0.0108555		5.9125	-0.0203475		5.9075	-0.000633299
6.38644	3.17507		6.38644	3.19878		6.38644	3.31078			5.9177	0.0108406		5.91917	-0.0210702		5.91417	-0.00146031
6.39364	3.17482		6.39364	3.198		6.39364	3.30401			5.92437	0.0109002		5.92583	-0.021629		5.92083	-0.0018701
6.40084	3.17487		6.40084	3.19805		6.40084	3.29816			5.93103	0.0109971		5.9325	-0.0218898		5.9275	-0.00167638
6.40804	3.17521		6.40804	3.19895		6.40804	3.29376			5.9377	0.0114143		5.93917	-0.0218078		5.93417	-0.000886619
6.41524	3.17575		6.41524	3.20053		6.41524	3.29121			5.94437	0.0123009		5.94583	-0.0213385		5.94083	-0.000417233
6.42244	3.17639		6.42244	3.20247		6.42244	3.29068			5.95103	0.0132248		5.9525	-0.0202805		5.9475	-0.000216067
6.42964	3.17708		6.42964	3.20452		6.42964	3.2921			5.9577	0.0136867		5.95917	-0.0191107		5.95417	-0.000171363
6.43684	3.1778		6.43684	3.20642		6.43684	3.29513			5.96437	0.0141039		5.96583	-0.0187084		5.96083	-0.000230968
6.44404	3.17849		6.44404	3.20795		6.44404	3.29934			5.97103	0.014782		5.9725	-0.0189394		5.9675	-0.000216067
6.45124	3.17906		6.45124	3.20898		6.45124	3.30434			5.9777	0.0158772		5.97917	-0.0194237		5.97417	-0.000506639
6.45844	3.1794		6.45844	3.20953		6.45844	3.30985			5.98437	0.0170022		5.98583	-0.0201315		5.98083	-0.000819564
6.46564	3.17941		6.46564	3.20977		6.46564	3.31561			5.99103	0.0178963		5.9925	-0.0210702		5.9875	-0.0012666
6.47284	3.1791		6.47284	3.20991		6.47284	3.32134			5.9977	0.0186414		5.99917	-0.02186		5.99417	-0.00169873
6.48004	3.17851		6.48004	3.2101		6.48004	3.32669			6.00437	0.0190809		6.00583	-0.0220463		6.00083	-0.00216067
6.48724	3.17761		6.48724	3.21037		6.48724	3.33127			6.01103	0.0189096		6.0125	-0.0219196		6.0075	-0.00292808
6.49444	3.17637		6.49444	3.21063		6.49444	3.3347			6.0177	0.0178143		6.01917	-0.0219271		6.01417	-0.00335276
6.50164	3.17481		6.50164	3.21075		6.50164	3.33667			6.02437	0.0163168		6.02583	-0.0220239		6.02083	-0.0031516
6.50884	3.17306		6.50884	3.21059		6.50884	3.337			6.03103	0.014998		6.0325	-0.0223145		6.0275	-0.00213832
6.51604	3.17131		6.51604	3.21015		6.51604	3.33559			6.0377	0.0143722		6.03917	-0.0226125		6.03417	-0.0012666
6.52324	3.16979		6.52324	3.2095		6.52324	3.33255			6.04437	0.0142232		6.04583	-0.0229403		6.04083	-0.000789762
6.53044	3.16866		6.53044	3.2088		6.53044	3.32819			6.05103	0.0140369		6.0525	-0.0231639		6.0475	-0.00013411
6.53764	3.16799		6.53764	3.20828		6.53764	3.32299			6.0577	0.0139177		6.05917	-0.0232831		6.05417	0.000782311
6.54484	3.16779		6.54484	3.20817		6.54484	3.31752			6.06437	0.0141263		6.06583	-0.0231788		6.06083	0.00175834
6.55204	3.16802		6.55204	3.2087		6.55204	3.3123			6.07103	0.0146404		6.0725	-0.0225604		6.0675	0.00230223
6.55924	3.16855		6.55924	3.20994		6.55924	3.30775			6.0777	0.0149161		6.07917	-0.0218004		6.07417	0.00306219
6.56644	3.16915		6.56644	3.21182		6.56644	3.30418			6.08437	0.0150427		6.08583	-0.0210106		6.08083	0.00411272
6.57364	3.16949		6.57364	3.21402		6.57364	3.30171			6.09103	0.0158399		6.0925	-0.0200868		6.0875	0.00458956
6.58084	3.16929		6.58084	3.21616		6.58084	3.30038			6.0977	0.0171065		6.09917	-0.0191405		6.09417	0.00409037
6.58804	3.16838		6.58804	3.21799		6.58804	3.30006			6.10437	0.0177845		6.10583	-0.0187978		6.10083	0.00291318
6.59524	3.16682		6.59524	3.21944		6.59524	3.30062			6.11103	0.0173301		6.1125	-0.0193492		6.1075	0.00196695
6.60244	3.16485		6.60244	3.2206		6.60244	3.30186			6.1177	0.016138		6.11917	-0.0198483		6.11417	0.00111014
6.60964	3.16285		6.60964	3.22153		6.60964	3.30371			6.12437	0.0149235		6.12583	-0.0200942		6.12083	0.000119209
6.61684	3.16126		6.61684	3.22227		6.61684	3.30609			6.13103	0.0137612		6.1325	-0.0201315		6.1275	-0.000678003
6.62404	3.1605		6.62404	3.22282		6.62404	3.30884			6.1377	0.0129491		6.13917	-0.020057		6.13417	-0.00102073
6.63124	3.161		6.63124	3.22312		6.63124	3.31172			6.14437	0.0128895		6.14583	-0.0197291		6.14083	-0.000834465
6.63844	3.16299		6.63844	3.22309		6.63844	3.31442			6.15103	0.0136569		6.1525	-0.0193566		6.1475	-0.00064075
6.64564	3.16647		6.64564	3.22254		6.64564	3.31663			6.1577	0.014849		6.15917	-0.0197068		6.15417	-0.00037998
6.65284	3.1711		6.65284	3.22124		6.65284	3.31807			6.16437	0.0158548		6.16583	-0.0204667		6.16083	-5.21541e-05
6.66004	3.17631		6.66004	3.21907		6.66004	3.31858			6.17103	0.0162944		6.1725	-0.0211895		6.1675	0.000469387
6.66724	3.18142		6.66724	3.21619		6.66724	3.31809			6.1777	0.0160933		6.17917	-0.0215769		6.17417	0.00108778
6.67444	3.18577		6.67444	3.21301		6.67444	3.31671			6.18437	0.0156015		6.18583	-0.0216365		6.18083	0.00148267
6.68164	3.18881		6.68164	3.2101		6.68164	3.3147			6.19103	0.0152886		6.1925	-0.0211969		6.1875	0.00160933
6.68884	3.19012		6.68884	3.20797		6.68884	3.31246			6.1977	0.0151172		6.19917	-0.0201613		6.19417	0.00157207
6.69604	3.18963		6.69604	3.20696		6.69604	3.31035			6.20437	0.0148043		6.20583	-0.0189245		6.20083	0.00199676
6.70324	3.18756		6.70324	3.20724		6.70324	3.30865			6.21103	0.0145286		6.2125	-0.0183284		6.2075	0.00304729
6.71044	3.18443		6.71044	3.20877		6.71044	3.30748			6.2177	0.0149012		6.21917	-0.0185221		6.21417	0.00426173
6.71764	3.18085		6.71764	3.21137		6.71764	3.30675			6.22437	0.0158697		6.22583	-0.0191778		6.22083	0.00525266
6.72484	3.17742		6.72484	3.21466		6.72484	3.30624			6.23103	0.016503		6.2325	-0.0197813		6.2275	0.0057146
6.73204	3.17466		6.73204	3.21808		6.73204	3.30572			6.2377	0.0167564		6.23917	-0.0200421		6.23417	0.00570714
6.73924	3.17288		6.73924	3.22111		6.73924	3.30499			6.24437	0.017114		6.24583	-0.0198409		6.24083	0.00517815
6.74644	3.17227		6.74644	3.22331		6.74644	3.30407			6.25103	0.0178292		6.2525	-0.0192747		6.2475	0.00429153
6.75364	3.17268		6.75364	3.22447		6.75364	3.30309			6.2577	0.018172		6.25917	-0.0183135		6.25417	0.00356138
6.76084	3.17382		6.76084	3.22456		6.76084	3.30232			6.26437	0.0177175		6.26583	-0.0171438		6.26083	0.00305474
6.76804	3.17533		6.76804	3.22368		6.76804	3.302			6.27103	0.0169948		6.2725	-0.0160486		6.2675	0.00284612
6.77524	3.1769		6.77524	3.22198		6.77524	3.30234			6.2777	0.0163615		6.27917	-0.0156462		6.27417	0.00303239
6.78244	3.17834		6.78244	3.21962		6.78244	3.30338			6.28437	0.0158474		6.28583	-0.0160262		6.28083	0.00368059
6.78964	3.17947		6.78964	3.21674		6.78964	3.30507			6.29103	0.0151098		6.2925	-0.0165924		6.2875	0.00427663
6.79684	3.1801		6.79684	3.21351		6.79684	3.30716			6.2977	0.0144765		6.29917	-0.0172332		6.29417	0.0044629
6.80404	3.1801		6.80404	3.21003		6.80404	3.3093			6.30437	0.0144318		6.30583	-0.0178367		6.30083	0.00435859
6.81124	3.17944		6.81124	3.20633		6.81124	3.31108			6.31103	0.0149608		6.3125	-0.0185817		6.3075	0.00455976
6.81844	3.17814		6.81844	3.20252		6.81844	3.31211			6.3177	0.0158101		6.31917	-0.0191405		6.31417	0.00485778
6.82564	3.17624		6.82564	3.19868		6.82564	3.31219			6.32437	0.0166893		6.32583	-0.0194684		6.32083	0.00467896
6.83284	3.17376		6.83284	3.19504		6.83284	3.31141			6.33103	0.0174567		6.3325	-0.0196025		6.3275	0.00435859
6.84004	3.17077		6.84004	3.19183		6.84004	3.31011			6.3377	0.0174716		6.33917	-0.0196397		6.33417	0.00435859
6.84724	3.16755		6.84724	3.18933		6.84724	3.30875			6.34437	0.0167266		6.34583	-0.0199974		6.34083	0.00488013
6.85444	3.16454		6.85444	3.18777		6.85444	3.30778			6.35103	0.0158772		6.3525	-0.0206828		6.3475	0.00556558
6.86164	3.16226		6.86164	3.1873		6.86164	3.30757			6.3577	0.0153333		6.35917	-0.0213012		6.35417	0.00619888
6.86884	3.16114		6.86884	3.18798		6.86884	3.30832			6.36437	0.0149831		6.36583	-0.0214428		6.36083	0.00707805
6.87604	3.16141		6.87604	3.18974		6.87604	3.31014			6.37103	0.0150874		6.3725	-0.0212416		6.3675	0.00775605
6.88324	3.16317		6.88324	3.19244		6.88324	3.31299			6.3777	0.0161454		6.37917	-0.0209287		6.37417	0.00793487
6.89044	3.16632		6.89044	3.19574		6.89044	3.31662			6.38437	0.0179335		6.38583	-0.020273		6.38083	0.00751764
6.89764	3.17053		6.89764	3.19926		6.89764	3.32063			6.39103	0.0195354		6.3925	-0.019446		6.3875	0.00667572
6.90484	3.17523		6.90484	3.20256		6.90484	3.3246			6.3977	0.020653		6.39917	-0.0189543		6.39417	0.00584126
6.91204	3.17974		6.91204	3.20535		6.91204	3.32817			6.40437	0.0213459		6.40583	-0.0191778		6.40083	0.00535697
6.91924	3.18347		6.91924	3.20755		6.91924	3.33121			6.41103	0.0212416		6.4125	-0.0199601		6.4075	0.00549853
6.92644	3.18604		6.92644	3.2092		6.92644	3.33377			6.4177	0.020206		6.41917	-0.0208095		6.41417	0.0057742
6.93364	3.18729		6.93364	3.21038		6.93364	3.33596			6.42437	0.0189021		6.42583	-0.0216737		6.42083	0.00594556
6.94084	3.18729		6.94084	3.21112		6.94084	3.33796			6.43103	0.0179261		6.4325	-0.0222996		6.4275	0.00628829
6.94804	3.18627		6.94804	3.21146		6.94804	3.33986			6.4377	0.0170767		6.43917	-0.0225976		6.43417	0.00664592
6.95524	3.18468		6.95524	3.21153		6.95524	3.34169			6.44437	0.0161678		6.44583	-0.0225008		6.44083	0.00648946
6.96244	3.18293		6.96244	3.21144		6.96244	3.34337			6.45103	0.0158325		6.4525	-0.0217408		6.4475	0.0057742
6.96964	3.18137		6.96964	3.21122		6.96964	3.34474			6.4577	0.0165254		6.45917	-0.0207946		6.45417	0.00531226
6.97684	3.18008		6.97684	3.21084		6.97684	3.34554			6.46437	0.0175089		6.46583	-0.020057		6.46083	0.00584126
6.98404	3.17901		6.98404	3.21029		6.98404	3.34546			6.47103	0.0179633		6.4725	-0.0195652		6.4675	0.00631809
6.99124	3.17806		6.99124	3.20966		6.99124	3.34424			6.4777	0.0179037		6.47917	-0.0191703		6.47417	0.0063628
6.99844	3.17715		6.99844	3.2091		6.99844	3.34181			6.48437	0.0181198		6.48583	-0.0184998		6.48083	0.00599027
7.00564	3.17626		7.00564	3.20877		7.00564	3.33832			6.49103	0.018537		6.4925	-0.018172		6.4875	0.00584126
7.01284	3.17538		7.01284	3.20876		7.01284	3.33416			6.4977	0.0187084		6.49917	-0.0180975		6.49417	0.00569969
7.02004	3.17463		7.02004	3.20904		7.02004	3.32989			6.50437	0.01847		6.50583	-0.0179037		6.50083	0.00473857
7.02724	3.17422		7.02724	3.20951		7.02724	3.32601			6.51103	0.0183433		6.5125	-0.017412		6.5075	0.00366569
7.03445	3.17441		7.03445	3.21003		7.03445	3.32294			6.5177	0.01885		6.51917	-0.016585		6.51417	0.00315905
7.04165	3.17534		7.04165	3.21049		7.04165	3.32096			6.52437	0.0195652		6.52583	-0.0159368		6.52083	0.00356138
7.04885	3.17687		7.04885	3.21074		7.04885	3.32016			6.53103	0.0199676		6.5325	-0.0153109		6.5275	0.00406802
7.05605	3.17864		7.05605	3.21074		7.05605	3.3206			6.5377	0.0197962		6.53917	-0.014551		6.53417	0.00441819
7.06325	3.18016		7.06325	3.21059		7.06325	3.32218			6.54437	0.0192299		6.54583	-0.013873		6.54083	0.00473112
7.07045	3.18096		7.07045	3.21048		7.07045	3.3246			6.55103	0.018388		6.5525	-0.0137016		6.5475	0.00488758
7.07765	3.18065		7.07765	3.21067		7.07765	3.32744			6.5577	0.0172555		6.55917	-0.0140443		6.55417	0.00464916
7.08485	3.17903		7.08485	3.21133		7.08485	3.33023			6.56437	0.0159442		6.56583	-0.0145659		6.56083	0.00431389
7.09205	3.17605		7.09205	3.21251		7.09205	3.33267			6.57103	0.0149012		6.5725	-0.0153705		6.5675	0.00414252
7.09925	3.17194		7.09925	3.21414		7.09925	3.33459			6.5777	0.0141561		6.57917	-0.0165552		6.57417	0.00408292
7.10645	3.16719		7.10645	3.21606		7.10645	3.33589			6.58437	0.0139326		6.58583	-0.0173673		6.58083	0.00403821
7.11365	3.16242		7.11365	3.2179		7.11365	3.33635			6.59103	0.0143126		6.5925	-0.0174046		6.5875	0.00409782
7.12085	3.15823		7.12085	3.21922		7.12085	3.33577			6.5977	0.0151545		6.59917	-0.0170097		6.59417	0.00435859
7.12805	3.15506		7.12805	3.21954		7.12805	3.33409			6.60437	0.0162944		6.60583	-0.0168607		6.60083	0.0044331
7.13525	3.15309		7.13525	3.21852		7.13525	3.33151			6.61103	0.0172108		6.6125	-0.0170618		6.6075	0.00431389
7.14245	3.15226		7.14245	3.21607		7.14245	3.32834			6.6177	0.0183061		6.61917	-0.0173971		6.61417	0.00432879
7.14965	3.15238		7.14965	3.21237		7.14965	3.32489			6.62437	0.019595		6.62583	-0.0183433		6.62083	0.00475347
7.15685	3.1531		7.15685	3.20789		7.15685	3.32136			6.63103	0.0207946		6.6325	-0.0197515		6.6275	0.00554323
7.16405	3.15412		7.16405	3.20321		7.16405	3.31799			6.6377	0.0214577		6.63917	-0.0213757		6.63417	0.00623614
7.17125	3.15511		7.17125	3.19898		7.17125	3.315			6.64437	0.0215545		6.64583	-0.02262		6.64083	0.00657886
7.17845	3.1559		7.17845	3.19577		7.17845	3.31266			6.65103	0.0213012		6.6525	-0.0232011		6.6475	0.00648201
7.18565	3.15649		7.18565	3.19405		7.18565	3.31106			6.6577	0.0207499		6.65917	-0.0233129		6.65417	0.00602752
7.19285	3.15706		7.19285	3.19406		7.19285	3.31013			6.66437	0.0200421		6.66583	-0.0230595		6.66083	0.00534207
7.20005	3.15788		7.20005	3.19575		7.20005	3.30969			6.67103	0.0192598		6.6725	-0.0225604		6.6675	0.00452995
7.20725	3.15925		7.20725	3.19871		7.20725	3.30951			6.6777	0.018701		6.67917	-0.0218004		6.67417	0.00379235
7.21445	3.16141		7.21445	3.20231		7.21445	3.3094			6.68437	0.018239		6.68583	-0.021182		6.68083	0.00344962
7.22165	3.16445		7.22165	3.20587		7.22165	3.30927			6.69103	0.0180379		6.6925	-0.0207499		6.6875	0.0037998
7.22885	3.16837		7.22885	3.20894		7.22885	3.30906			6.6977	0.0181124		6.69917	-0.0203922		6.69417	0.00470132
7.23605	3.17299		7.23605	3.21134		7.23605	3.30878			6.70437	0.01809		6.70583	-0.0198781		6.70083	0.00553578
7.24325	3.17795		7.24325	3.21309		7.24325	3.30849			6.71103	0.0179783		6.7125	-0.0195205		6.7075	0.00569224
7.25045	3.18283		7.25045	3.21429		7.25045	3.30825			6.7177	0.0179186		6.71917	-0.0195429		6.71417	0.00546128
7.25765	3.18714		7.25765	3.21516		7.25765	3.30815			6.72437	0.0180528		6.72583	-0.0197142		6.72083	0.00521541
7.26485	3.19052		7.26485	3.21599		7.26485	3.30823			6.73103	0.0185072		6.7325	-0.0200719		6.7275	0.00531971
7.27205	3.19272		7.27205	3.21707		7.27205	3.30849			6.7377	0.0190511		6.73917	-0.020653		6.73417	0.00549108
7.27925	3.19369		7.27925	3.21848		7.27925	3.30887			6.74437	0.0196621		6.74583	-0.0214055		6.74083	0.0057146
7.28645	3.19352		7.28645	3.22007		7.28645	3.30933			6.75103	0.019908		6.7525	-0.0220984		6.7475	0.00610948
7.29365	3.19247		7.29365	3.22146		7.29365	3.3097			6.7577	0.0194609		6.75917	-0.0224933		6.75417	0.00650436
7.30085	3.19093		7.30085	3.22229		7.30085	3.30987			6.76437	0.0187829		6.76583	-0.022769		6.76083	0.00655651
7.30805	3.18933		7.30805	3.22234		7.30805	3.30972			6.77103	0.0180975		6.7725	-0.0226721		6.7675	0.0058189
7.31525	3.18802		7.31525	3.22155		7.31525	3.30923			6.7777	0.0174493		6.77917	-0.0221506		6.77417	0.00496209
7.32245	3.18713		7.32245	3.21995		7.32245	3.30846			6.78437	0.0169501		6.78583	-0.0215173		6.78083	0.00454485
7.32965	3.18663		7.32965	3.21766		7.32965	3.30757			6.79103	0.0170618		6.7925	-0.0210926		6.7875	0.00480562
7.33685	3.18639		7.33685	3.21488		7.33685	3.3067			6.7977	0.0177547		6.79917	-0.0208989		6.79417	0.00549108
7.34405	3.18626		7.34405	3.21193		7.34405	3.30594			6.80437	0.0184625		6.80583	-0.0207275		6.80083	0.00619888
7.35125	3.18602		7.35125	3.20925		7.35125	3.30541			6.81103	0.0184774		6.8125	-0.0208244		6.8075	0.00693649
7.35845	3.18543		7.35845	3.20725		7.35845	3.30523			6.8177	0.01809		6.81917	-0.0212714		6.81417	0.0070557
7.36565	3.18419		7.36565	3.20626		7.36565	3.30553			6.82437	0.0175759		6.82583	-0.0216588		6.82083	0.00678748
7.37285	3.18214		7.37285	3.20641		7.37285	3.3064			6.83103	0.0170097		6.8325	-0.0218078		6.8275	0.00613928
7.38005	3.17929		7.38005	3.20767		7.38005	3.30786			6.8377	0.0163689		6.83917	-0.0219196		6.83417	0.0051558
7.38725	3.17585		7.38725	3.2099		7.38725	3.30986			6.84437	0.0158101		6.84583	-0.0219792		6.84083	0.00429153
7.39445	3.17215		7.39445	3.21282		7.39445	3.31231			6.85103	0.015907		6.8525	-0.0217706		6.8475	0.00351667
7.40165	3.16853		7.40165	3.21603		7.40165	3.31506			6.8577	0.0167415		6.85917	-0.0213161		6.85417	0.00330061
7.40885	3.16533		7.40885	3.21898		7.40885	3.31792			6.86437	0.0176504		6.86583	-0.0214353		6.86083	0.00286847
7.41605	3.16291		7.41605	3.22114		7.41605	3.32066			6.87103	0.0181794		6.8725	-0.0223219		6.8675	0.00236928
7.42325	3.16159		7.42325	3.22208		7.42325	3.32306			6.8777	0.0185668		6.87917	-0.0232533		6.87417	0.0018701
7.43045	3.16154		7.43045	3.2217		7.43045	3.32491			6.88437	0.0190511		6.88583	-0.0237748		6.88083	0.00145286
7.43765	3.16277		7.43765	3.22008		7.43765	3.32605			6.89103	0.0194833		6.8925	-0.0238791		6.8875	0.00127405
7.44485	3.16502		7.44485	3.21755		7.44485	3.32638			6.8977	0.0191256		6.89917	-0.0240207		6.89417	0.0012964
7.45205	3.16789		7.45205	3.21453		7.45205	3.32596			6.90437	0.0183806		6.90583	-0.0240505		6.90083	0.00184029
7.45925	3.17098		7.45925	3.21145		7.45925	3.32499			6.91103	0.0178218		6.9125	-0.0235811		6.9075	0.00280887
7.46645	3.17395		7.46645	3.20867		7.46645	3.32379			6.9177	0.0174493		6.91917	-0.0226051		6.91417	0.00412762
7.47365	3.17659		7.47365	3.2064		7.47365	3.32268			6.92437	0.0171289		6.92583	-0.0217259		6.92083	0.00544637
7.48085	3.17881		7.48085	3.20469		7.48085	3.32186			6.93103	0.0167415		6.9325	-0.021331		6.9275	0.00638515
7.48805	3.18064		7.48805	3.20348		7.48805	3.32146			6.9377	0.0171885		6.93917	-0.0211075		6.93417	0.00668317
7.49525	3.18224		7.49525	3.20267		7.49525	3.32154			6.94437	0.0182316		6.94583	-0.0209361		6.94083	0.00652671
7.50245	3.18384		7.50245	3.20215		7.50245	3.32205			6.95103	0.0193045		6.9525	-0.0210851		6.9475	0.00611693
7.50965	3.18564		7.50965	3.20185		7.50965	3.32281			6.9577	0.0198334		6.95917	-0.0219122		6.95417	0.005804
7.51685	3.18773		7.51685	3.20173		7.51685	3.32353			6.96437	0.0199005		6.96583	-0.022687		6.96083	0.00532717
7.52405	3.1901		7.52405	3.20182		7.52405	3.32394			6.97103	0.0196248		6.9725	-0.0232309		6.9675	0.00489503
7.53125	3.19255		7.53125	3.20223		7.53125	3.32387			6.9777	0.0186637		6.97917	-0.0235662		6.97417	0.00441074
7.53845	3.19483		7.53845	3.20306		7.53845	3.32328			6.98437	0.0173077		6.98583	-0.023447		6.98083	0.00383705
7.54565	3.19666		7.54565	3.20431		7.54565	3.32224			6.99103	0.0157505		6.9925	-0.0227019		6.9875	0.00313669
7.55285	3.1978		7.55285	3.20584		7.55285	3.32091			6.9977	0.0149384		6.99917	-0.0216886		6.99417	0.00244379
7.56005	3.19809		7.56005	3.20739		7.56005	3.31962			7.00437	0.0146031		7.00583	-0.0212491		7.00083	0.00226498
7.56725	3.1975		7.56725	3.20864		7.56725	3.31869			7.01103	0.0148714		7.0125	-0.0214279		7.0075	0.00214577
7.57445	3.19611		7.57445	3.20936		7.57445	3.31839			7.0177	0.015676		7.01917	-0.0220463		7.01417	0.00192225
7.58165	3.1941		7.58165	3.20943		7.58165	3.31877			7.02437	0.0165775		7.02583	-0.0228211		7.02083	0.00178069
7.58885	3.19172		7.58885	3.20883		7.58885	3.31967			7.03103	0.0173822		7.0325	-0.0235811		7.0275	0.00173599
7.59605	3.18924		7.59605	3.20764		7.59605	3.32093			7.0377	0.017412		7.03917	-0.0240654		7.03417	0.00174344
7.60325	3.18683		7.60325	3.20603		7.60325	3.32236			7.04437	0.0172853		7.04583	-0.024341		7.04083	0.00137091
7.61045	3.18463		7.61045	3.20424		7.61045	3.32379			7.05103	0.0169575		7.0525	-0.0242591		7.0475	0.00119954
7.61765	3.18269		7.61765	3.20259		7.61765	3.32506			7.0577	0.016205		7.05917	-0.0236556		7.05417	0.00178069
7.62485	3.18101		7.62485	3.20122		7.62485	3.3261			7.06437	0.0152215		7.06583	-0.0228584		7.06083	0.00230968
7.63205	3.17962		7.63205	3.20015		7.63205	3.32703			7.07103	0.0144094		7.0725	-0.0226349		7.0675	0.00247359
7.63925	3.17854		7.63925	3.19925		7.63925	3.32819			7.0777	0.0141934		7.07917	-0.0228137		7.07417	0.00213087
7.64645	3.17775		7.64645	3.19833		7.64645	3.3299			7.08437	0.0142008		7.08583	-0.0230223		7.08083	0.00218302
7.65365	3.17713		7.65365	3.19723		7.65365	3.33231			7.09103	0.0140816		7.0925	-0.0230893		7.0875	0.00271201
7.66085	3.17655		7.66085	3.19591		7.66085	3.33528			7.0977	0.0141487		7.09917	-0.0232756		7.09417	0.00320375
7.66805	3.17596		7.66805	3.19448		7.66805	3.33855			7.10437	0.0145957		7.10583	-0.023827		7.10083	0.00377744
7.67525	3.17531		7.67525	3.19323		7.67525	3.34183			7.11103	0.0152886		7.1125	-0.0241324		7.1075	0.00458211
7.68245	3.17454		7.68245	3.19259		7.68245	3.34478			7.1177	0.0158772		7.11917	-0.0243559		7.11417	0.00557303
7.68965	3.17356		7.68965	3.19296		7.68965	3.34702			7.12437	0.0163168		7.12583	-0.0243112		7.12083	0.00609457
7.69685	3.17234		7.69685	3.19455		7.69685	3.34816			7.13103	0.016883		7.1325	-0.0238642		7.1275	0.005804
7.70405	3.17107		7.70405	3.19737		7.70405	3.34801			7.1377	0.017181		7.13917	-0.0230223		7.13417	0.00503659
7.71125	3.17013		7.71125	3.20125		7.71125	3.34665			7.14437	0.0168607		7.14583	-0.0217855		7.14083	0.0045374
7.71845	3.16991		7.71845	3.20583		7.71845	3.34435			7.15103	0.0160336		7.1525	-0.0206754		7.1475	0.00456721
7.72565	3.17073		7.72565	3.21062		7.72565	3.34148			7.1577	0.0155345		7.15917	-0.0196919		7.15417	0.00494719
7.73285	3.17266		7.73285	3.21505		7.73285	3.33836			7.16437	0.0156835		7.16583	-0.0187531		7.16083	0.00566989
7.74005	3.17558		7.74005	3.2187		7.74005	3.33524			7.17103	0.0161827		7.1725	-0.018321		7.1675	0.00651181
7.74725	3.17922		7.74725	3.22138		7.74725	3.33241			7.1777	0.0169054		7.17917	-0.0188202		7.17417	0.00724941
7.75445	3.18319		7.75445	3.22315		7.75445	3.33021			7.18437	0.0179037		7.18583	-0.0200123		7.18083	0.00739843
7.76165	3.18699		7.76165	3.22419		7.76165	3.32893			7.19103	0.0190884		7.1925	-0.0209883		7.1875	0.00672787
7.76885	3.19008		7.76885	3.2247		7.76885	3.32875			7.1977	0.0199601		7.19917	-0.0212789		7.19417	0.0057891
7.77605	3.19195		7.77605	3.22479		7.77605	3.32969			7.20437	0.0197887		7.20583	-0.0214726		7.20083	0.00489503
7.78325	3.19236		7.78325	3.22457		7.78325	3.33165			7.21103	0.0186712		7.2125	-0.0215918		7.2075	0.00464171
7.79045	3.19134		7.79045	3.22413		7.79045	3.33444			7.2177	0.0169799		7.21917	-0.0212044		7.21417	0.00502914
7.79765	3.18919		7.79765	3.22355		7.79765	3.33782			7.22437	0.0154749		7.22583	-0.0205114		7.22083	0.00564009
7.80485	3.18626		7.80485	3.22283		7.80485	3.34141			7.23103	0.0145584		7.2325	-0.0202358		7.2275	0.00625849
7.81205	3.18289		7.81205	3.22198		7.81205	3.34472			7.2377	0.0140518		7.23917	-0.0206977		7.23417	0.00675023
7.81925	3.17935		7.81925	3.22109		7.81925	3.34727			7.24437	0.0146031		7.24583	-0.0214428		7.24083	0.00724941
7.82645	3.17588		7.82645	3.22027		7.82645	3.34868			7.25103	0.0158921		7.2525	-0.0220239		7.2475	0.00718236
7.83365	3.17277		7.83365	3.21961		7.83365	3.34882			7.2577	0.0174791		7.25917	-0.0223666		7.25417	0.00628084
7.84085	3.17022		7.84085	3.21915		7.84085	3.34777			7.26437	0.0186488		7.26583	-0.0225082		7.26083	0.00521541
7.84805	3.1683		7.84805	3.21878		7.84805	3.34576			7.27103	0.0194833		7.2725	-0.0224486		7.2675	0.00501424
7.85525	3.16694		7.85525	3.21832		7.85525	3.34306			7.2777	0.0201985		7.27917	-0.0222549		7.27417	0.00569969
7.86245	3.16603		7.86245	3.2176		7.86245	3.33999			7.28437	0.0203028		7.28583	-0.0219494		7.28083	0.00621378
7.86965	3.1655		7.86965	3.2165		7.86965	3.33683			7.29103	0.020206		7.2925	-0.0218153		7.2875	0.00619143
7.87685	3.16532		7.87685	3.21504		7.87685	3.33384			7.2977	0.0204071		7.29917	-0.0218749		7.29417	0.00622869
7.88405	3.16546		7.88405	3.21328		7.88405	3.33114			7.30437	0.0212863		7.30583	-0.0219122		7.30083	0.00633299
7.89125	3.1658		7.89125	3.21138		7.89125	3.32876			7.31103	0.0220835		7.3125	-0.0218749		7.3075	0.00610948
7.89845	3.16627		7.89845	3.20958		7.89845	3.32664			7.3177	0.0224262		7.31917	-0.0220761		7.31417	0.00535697
7.90565	3.16688		7.90565	3.2082		7.90565	3.32472			7.32437	0.0220984		7.32583	-0.02262		7.32083	0.00493228
7.91285	3.16774		7.91285	3.20753		7.91285	3.32299			7.33103	0.02148		7.3325	-0.0231788		7.3275	0.00526011
7.92005	3.16892		7.92005	3.20769		7.92005	3.3215			7.3377	0.0211522		7.33917	-0.0235438		7.33417	0.00587851
7.92725	3.17039		7.92725	3.20855		7.92725	3.32038			7.34437	0.0210926		7.34583	-0.024125		7.34083	0.00657141
7.93445	3.17202		7.93445	3.20982		7.93445	3.31977			7.35103	0.0211746		7.3525	-0.0249594		7.3475	0.00659376
7.94165	3.17366		7.94165	3.21117		7.94165	3.31972			7.3577	0.0211596		7.35917	-0.0255331		7.35417	0.00611693
7.94885	3.17513		7.94885	3.21236		7.94885	3.32017			7.36437	0.0214949		7.36583	-0.0253767		7.36083	0.00527501
7.95605	3.17636		7.95605	3.21324		7.95605	3.32094			7.37103	0.0219792		7.3725	-0.0245944		7.3675	0.00472367
7.96325	3.17724		7.96325	3.21378		7.96325	3.3218			7.3777	0.0219569		7.37917	-0.0237525		7.37417	0.00458211
7.97045	3.1778		7.97045	3.21398		7.97045	3.32252			7.38437	0.0214204		7.38583	-0.0226051		7.38083	0.00467896
7.97765	3.17822		7.97765	3.21401		7.97765	3.32291			7.39103	0.020735		7.3925	-0.0211447		7.3875	0.00522286
7.98485	3.17875		7.98485	3.21411		7.98485	3.32286			7.3977	0.0202879		7.39917	-0.0197738		7.39417	0.00585616
7.99205	3.17969		7.99205	3.2145		7.99205	3.32248			7.40437	0.0200868		7.40583	-0.0190884		7.40083	0.00616908
7.99925	3.18118		7.99925	3.21525		7.99925	3.32205			7.41103	0.0198707		7.4125	-0.0195801		7.4075	0.00564009
8.00645	3.18317		8.00645	3.21617		8.00645	3.32201			7.4177	0.0198036		7.41917	-0.0204667		7.41417	0.00471622
8.01365	3.18536		8.01365	3.21692		8.01365	3.3227			7.42437	0.0195354		7.42583	-0.0212416		7.42083	0.00382215
8.02085	3.18733		8.02085	3.21715		8.02085	3.32432			7.43103	0.0189766		7.4325	-0.0211969		7.4275	0.0031814
8.02805	3.18862		8.02805	3.2166		8.02805	3.3268			7.4377	0.018239		7.43917	-0.0206381		7.43417	0.00295043
8.03525	3.18885		8.03525	3.21516		8.03525	3.32986			7.44437	0.0173897		7.44583	-0.0199229		7.44083	0.00323355
8.04245	3.18776		8.04245	3.21288		8.04245	3.33306			7.45103	0.016816		7.4525	-0.018999		7.4475	0.00377744
8.04965	3.18527		8.04965	3.21001		8.04965	3.33591			7.4577	0.0161827		7.45917	-0.0181049		7.45417	0.00416487
8.05685	3.18162		8.05685	3.20697		8.05685	3.3379			7.46437	0.0159517		7.46583	-0.0178143		7.46083	0.00417233
8.06405	3.1773		8.06405	3.20433		8.06405	3.33876			7.47103	0.0162125		7.4725	-0.0186637		7.4675	0.00419468
8.07125	3.17305		8.07125	3.20258		8.07125	3.33843			7.4777	0.0168756		7.47917	-0.0199378		7.47417	0.00440329
8.07845	3.16957		8.07845	3.20203		8.07845	3.33723			7.48437	0.0174791		7.48583	-0.0209212		7.48083	0.00461191
8.08565	3.16737		8.08565	3.20271		8.08565	3.33565			7.49103	0.0177398		7.4925	-0.0216812		7.4875	0.00476092
8.09285	3.16657		8.09285	3.20439		8.09285	3.33425			7.4977	0.0178218		7.49917	-0.0226945		7.49417	0.0051409
8.10005	3.16711		8.10005	3.20667		8.10005	3.3335			7.50437	0.0179559		7.50583	-0.0235736		7.50083	0.00599772
8.10725	3.16879		8.10725	3.20914		8.10725	3.33362			7.51103	0.0181049		7.5125	-0.023976		7.5075	0.00663847
8.11445	3.17132		8.11445	3.21139		8.11445	3.33461			7.5177	0.0184774		7.51917	-0.0239313		7.51417	0.00673532
8.12165	3.17428		8.12165	3.21311		8.12165	3.33627			7.52437	0.0189841		7.52583	-0.0236779		7.52083	0.0063926
8.12885	3.17709		8.12885	3.21416		8.12885	3.33828			7.53103	0.019446		7.5325	-0.0230223		7.5275	0.00630319
8.13605	3.17931		8.13605	3.21458		8.13605	3.3402			7.5377	0.0196844		7.53917	-0.0215918		7.53417	0.00661612
8.14325	3.1807		8.14325	3.2146		8.14325	3.34163			7.54437	0.0195205		7.54583	-0.0197515		7.54083	0.0070706
8.15045	3.18133		8.15045	3.21453		8.15045	3.34228			7.55103	0.0193045		7.5525	-0.0178218		7.5475	0.0076443
8.15765	3.1814		8.15765	3.21461		8.15765	3.34206			7.5577	0.0188574		7.55917	-0.0161156		7.55417	0.00803918
8.16485	3.18108		8.16485	3.21493		8.16485	3.34111			7.56437	0.0183657		7.56583	-0.0149757		7.56083	0.00826269
8.17205	3.18058		8.17205	3.21539		8.17205	3.33973			7.57103	0.017859		7.5725	-0.0148714		7.5675	0.00815094
8.17925	3.18014		8.17925	3.21584		8.17925	3.33825			7.5777	0.0175983		7.57917	-0.0158995		7.57417	0.00742078
8.18645	3.18009		8.18645	3.21614		8.18645	3.33704			7.58437	0.0170991		7.58583	-0.0174344		7.58083	0.00625849
8.19365	3.18066		8.19365	3.21618		8.19365	3.33635			7.59103	0.0163168		7.5925	-0.0189021		7.5875	0.00525266
8.20085	3.1819		8.20085	3.21588		8.20085	3.33638			7.5977	0.0155568		7.59917	-0.0201762		7.59417	0.00501424
8.20805	3.18362		8.20805	3.21515		8.20805	3.33717			7.60437	0.0152588		7.60583	-0.021331		7.60083	0.00533462
8.21525	3.18545		8.21525	3.21404		8.21525	3.33863			7.61103	0.0154823		7.6125	-0.0221282		7.6075	0.00591576
8.22245	3.18698		8.22245	3.2128		8.22245	3.34061			7.6177	0.0158101		7.61917	-0.0224933		7.61417	0.00644475
8.22965	3.18789		8.22965	3.21174		8.22965	3.34288			7.62437	0.0165924		7.62583	-0.0226647		7.62083	0.00693649
8.23685	3.18792		8.23685	3.21108		8.23685	3.34523			7.63103	0.0175983		7.6325	-0.0228733		7.6275	0.0071004
8.24405	3.18704		8.24405	3.2108		8.24405	3.34752			7.6377	0.0183359		7.63917	-0.0227764		7.63417	0.00692159
8.25125	3.18542		8.25125	3.21081		8.25125	3.34969			7.64437	0.0182986		7.64583	-0.0222549		7.64083	0.00657886
8.25845	3.18345		8.25845	3.211		8.25845	3.3518			7.65103	0.0177175		7.6525	-0.0215843		7.6475	0.00615418
8.26565	3.18166		8.26565	3.2113		8.26565	3.35393			7.6577	0.0173673		7.65917	-0.0211746		7.65417	0.00631064
8.27285	3.18047		8.27285	3.21161		8.27285	3.35618			7.66437	0.0173748		7.66583	-0.0210553		7.66083	0.00675023
8.28005	3.18016		8.28005	3.21175		8.28005	3.35858			7.67103	0.0176057		7.6725	-0.0213236		7.6675	0.00717491
8.28725	3.18069		8.28725	3.21165		8.28725	3.36106			7.6777	0.0180006		7.67917	-0.0221878		7.67417	0.00730902
8.29445	3.1818		8.29445	3.21136		8.29445	3.36344			7.68437	0.0186041		7.68583	-0.0235066		7.68083	0.00740588
8.30165	3.18302		8.30165	3.21106		8.30165	3.36549			7.69103	0.0193417		7.6925	-0.0245795		7.6875	0.00742078
8.30885	3.18385		8.30885	3.2109		8.30885	3.36702			7.6977	0.0195205		7.69917	-0.0250861		7.69417	0.00683963
8.31605	3.18392		8.31605	3.2109		8.31605	3.36794			7.70437	0.0190288		7.70583	-0.0251457		7.70083	0.0058338
8.32325	3.18311		8.32325	3.21101		8.32325	3.36831			7.71103	0.0178516		7.7125	-0.0252202		7.7075	0.00510365
8.33045	3.18152		8.33045	3.21121		8.33045	3.36832			7.7177	0.0165924		7.71917	-0.0255033		7.71417	0.00476837
8.33765	3.17944		8.33765	3.21151		8.33765	3.36825			7.72437	0.0158101		7.72583	-0.0255182		7.72083	0.00447035
8.34485	3.17727		8.34485	3.21194		8.34485	3.36841			7.73103	0.0158325		7.7325	-0.0251308		7.7275	0.00397116
8.35205	3.17541		8.35205	3.21244		8.35205	3.36912			7.7377	0.0167787		7.73917	-0.0243708		7.73417	0.00339746
8.35925	3.17418		8.35925	3.21287		8.35925	3.37057			7.74437	0.0179186		7.74583	-0.0235438		7.74083	0.00271201
8.36645	3.17372		8.36645	3.21308		8.36645	3.37282			7.75103	0.0190511		7.7525	-0.0224784		7.7475	0.00171363
8.37365	3.17401		8.37365	3.21303		8.37365	3.37574			7.7577	0.0198334		7.75917	-0.0210702		7.75417	0.000968575
8.38085	3.17486		8.38085	3.21267		8.38085	3.37905			7.76437	0.0202134		7.76583	-0.0196099		7.76083	0.000692904
8.38805	3.17604		8.38805	3.21193		8.38805	3.38249			7.77103	0.0198483		7.7725	-0.0186414		7.7675	0.000856817
8.39525	3.17743		8.39525	3.21072		8.39525	3.38585			7.7777	0.0187457		7.77917	-0.0182837		7.77417	0.00125915
8.40245	3.17894		8.40245	3.20901		8.40245	3.389			7.78437	0.0177473		7.78583	-0.0181198		7.78083	0.00207126
8.40965	3.18055		8.40965	3.20697		8.40965	3.3919			7.79103	0.0169426		7.7925	-0.0177994		7.7875	0.00330061
8.41685	3.18229		8.41685	3.20503		8.41685	3.39465			7.7977	0.0163242		7.79917	-0.0176504		7.79417	0.00439584
8.42405	3.18412		8.42405	3.20368		8.42405	3.39742			7.80437	0.0155866		7.80583	-0.01809		7.80083	0.00520051
8.43125	3.18598		8.43125	3.20339		8.43125	3.4005			7.81103	0.0152588		7.8125	-0.0187308		7.8075	0.00560284
8.43845	3.18772		8.43845	3.20439		8.43845	3.4041			7.8177	0.0158697		7.81917	-0.0188202		7.81417	0.00564009
8.44565	3.18913		8.44565	3.20681		8.44565	3.40843			7.82437	0.0169873		7.82583	-0.0189245		7.82083	0.00524521
8.45285	3.19		8.45285	3.21063		8.45285	3.41352			7.83103	0.0185296		7.8325	-0.0198707		7.8275	0.00470132
8.46005	3.19012		8.46005	3.21571		8.46005	3.41929			7.8377	0.0200644		7.83917	-0.0212714		7.83417	0.00410527
8.46725	3.18942		8.46725	3.22163		8.46725	3.4255			7.84437	0.0212267		7.84583	-0.0223145		7.84083	0.00372529
8.47445	3.18792		8.47445	3.22775		8.47445	3.43177			7.85103	0.0217184		7.8525	-0.0228807		7.8475	0.00397861
8.48165	3.18583		8.48165	3.23347		8.48165	3.43764			7.8577	0.0212044		7.85917	-0.0238195		7.85417	0.00485778
8.48885	3.18349		8.48885	3.23831		8.48885	3.44272			7.86437	0.0202954		7.86583	-0.0247806		7.86083	0.00590831
8.49605	3.18139		8.49605	3.24207		8.49605	3.44661			7.87103	0.019297		7.8725	-0.0252873		7.8675	0.00622869
8.50325	3.17998		8.50325	3.24469		8.50325	3.44906			7.8777	0.0184849		7.87917	-0.0255108		7.87417	0.00590831
8.51045	3.1796		8.51045	3.2461		8.51045	3.45001			7.88437	0.01809		7.88583	-0.0255257		7.88083	0.00532717
8.51765	3.18044		8.51765	3.2463		8.51765	3.44965			7.89103	0.0178739		7.8925	-0.0255033		7.8875	0.0045225
8.52485	3.18252		8.52485	3.24534		8.52485	3.44839			7.8977	0.0178218		7.89917	-0.0253841		7.89417	0.00353903
8.53205	3.18567		8.53205	3.24337		8.53205	3.4467			7.90437	0.0177175		7.90583	-0.0251457		7.90083	0.0025034
8.53925	3.18959		8.53925	3.24068		8.53925	3.44509			7.91103	0.0174195		7.9125	-0.0246018		7.9075	0.00215322
8.54645	3.19377		8.54645	3.23754		8.54645	3.44399			7.9177	0.0169128		7.91917	-0.023894		7.91417	0.00257045
8.55365	3.19762		8.55365	3.23428		8.55365	3.44373			7.92437	0.0164881		7.92583	-0.0233278		7.92083	0.0026226
8.56085	3.20064		8.56085	3.23126		8.56085	3.44454			7.93103	0.016354		7.9325	-0.023298		7.9275	0.00219792
8.56805	3.2025		8.56805	3.22887		8.56805	3.44642			7.9377	0.0167117		7.93917	-0.0232533		7.93417	0.00137836
8.57525	3.20311		8.57525	3.22744		8.57525	3.44921			7.94437	0.0172332		7.94583	-0.0231266		7.94083	0.00103563
8.58245	3.20255		8.58245	3.22714		8.58245	3.45257			7.95103	0.0176877		7.9525	-0.0228435		7.9475	0.000886619
8.58965	3.20107		8.58965	3.22795		8.58965	3.45616			7.9577	0.0179783		7.95917	-0.0224262		7.95417	0.000461936
8.59686	3.19905		8.59686	3.22962		8.59686	3.45968			7.96437	0.0179633		7.96583	-0.0222474		7.96083	0.000298023
8.60406	3.19705		8.60406	3.2317		8.60406	3.4629			7.97103	0.0177994		7.9725	-0.0221133		7.9675	0.000335276
8.61126	3.19561		8.61126	3.23364		8.61126	3.46568			7.9777	0.0174791		7.97917	-0.0219718		7.97417	0.000879169
8.61846	3.1952		8.61846	3.23495		8.61846	3.46792			7.98437	0.0171065		7.98583	-0.0217929		7.98083	0.00128895
8.62566	3.19606		8.62566	3.23535		8.62566	3.46965			7.99103	0.0166446		7.9925	-0.0220463		7.9875	0.00175834
8.63286	3.19823		8.63286	3.23488		8.63286	3.47098			7.9977	0.0162125		7.99917	-0.0228807		7.99417	0.00255555
8.64006	3.20155		8.64006	3.2338		8.64006	3.47213			8.00437	0.0158772		8.00583	-0.0236034		8.00083	0.00342727
8.64726	3.20575		8.64726	3.23248		8.64726	3.4733			8.01103	0.0155196		8.0125	-0.0238866		8.0075	0.00421703
8.65446	3.21035		8.65446	3.23137		8.65446	3.47461			8.0177	0.0150725		8.01917	-0.0241473		8.01417	0.00464171
8.66166	3.21484		8.66166	3.23087		8.66166	3.47608			8.02437	0.0145808		8.02583	-0.0248477		8.02083	0.00502169
8.66886	3.21864		8.66886	3.23128		8.66886	3.47763			8.03103	0.0140965		8.0325	-0.0257716		8.0275	0.00504404
8.67606	3.22138		8.67606	3.23266		8.67606	3.47918			8.0377	0.0141189		8.03917	-0.0261739		8.03417	0.00433624
8.68326	3.22289		8.68326	3.23477		8.68326	3.48063			8.04437	0.0144318		8.04583	-0.0259653		8.04083	0.00347942
8.69046	3.22323		8.69046	3.23711		8.69046	3.48192			8.05103	0.0150353		8.0525	-0.02525		8.0475	0.00310689
8.69766	3.22251		8.69766	3.23915		8.69766	3.48297			8.0577	0.0153407		8.05917	-0.0243858		8.05417	0.0031963
8.70486	3.22094		8.70486	3.24053		8.70486	3.48381			8.06437	0.0156537		8.06583	-0.0235438		8.06083	0.00295043
8.71206	3.21878		8.71206	3.24105		8.71206	3.48458			8.07103	0.0162497		8.0725	-0.0226945		8.0675	0.00221282
8.71926	3.21628		8.71926	3.24075		8.71926	3.48552			8.0777	0.0166371		8.07917	-0.022009		8.07417	0.00166148
8.72646	3.21365		8.72646	3.23986		8.72646	3.48696			8.08437	0.0165924		8.08583	-0.0214949		8.08083	0.00146776
8.73366	3.21094		8.73366	3.23872		8.73366	3.48918			8.09103	0.0160113		8.0925	-0.0216514		8.0875	0.00151992
8.74086	3.20813		8.74086	3.23778		8.74086	3.49245			8.0977	0.0153482		8.09917	-0.0223368		8.09417	0.00179559
8.74806	3.20522		8.74806	3.23743		8.74806	3.49694			8.10437	0.0149533		8.10583	-0.0227615		8.10083	0.00245869
8.75526	3.20235		8.75526	3.23788		8.75526	3.50274			8.11103	0.0152215		8.1125	-0.0226125		8.1075	0.00341237
8.76246	3.19973		8.76246	3.23913		8.76246	3.50983			8.1177	0.0158995		8.11917	-0.0224486		8.11417	0.00393391
8.76966	3.19757		8.76966	3.24097		8.76966	3.5181			8.12437	0.0164583		8.12583	-0.0229627		8.12083	0.00364333
8.77686	3.19605		8.77686	3.24306		8.77686	3.52734			8.13103	0.0167638		8.1325	-0.0237152		8.1275	0.00278652
8.78406	3.19533		8.78406	3.24503		8.78406	3.5372			8.1377	0.0171289		8.13917	-0.0237525		8.13417	0.00166148
8.79126	3.19554		8.79126	3.24658		8.79126	3.54732			8.14437	0.0173002		8.14583	-0.0233799		8.14083	0.000685453
8.79846	3.19676		8.79846	3.24752		8.79846	3.55742			8.15103	0.0166818		8.1525	-0.0230297		8.1475	-0.00012666
8.80566	3.19896		8.80566	3.24785		8.80566	3.56736			8.1577	0.0154078		8.15917	-0.0226721		8.15417	-0.000365078
8.81286	3.20198		8.81286	3.2477		8.81286	3.57716			8.16437	0.0145957		8.16583	-0.022158		8.16083	0.000268221
8.82006	3.20559		8.82006	3.24735		8.82006	3.58695			8.17103	0.014469		8.1725	-0.0216216		8.1675	0.00146776
8.82726	3.20958		8.82726	3.24718		8.82726	3.59698			8.1777	0.0147074		8.17917	-0.0215471		8.17417	0.00283867
8.83446	3.21389		8.83446	3.24767		8.83446	3.60757			8.18437	0.0147671		8.18583	-0.0218898		8.18083	0.00401586
8.84166	3.21849		8.84166	3.24914		8.84166	3.61913			8.19103	0.014618		8.1925	-0.0223815		8.1875	0.00534952
8.84886	3.22331		8.84886	3.25177		8.84886	3.63224			8.1977	0.0147447		8.19917	-0.0227019		8.19417	0.00651926
8.85606	3.22822		8.85606	3.2555		8.85606	3.6474			8.20437	0.0153109		8.20583	-0.022456		8.20083	0.00689924
8.86326	3.23308		8.86326	3.26016		8.86326	3.66503			8.21103	0.0160187		8.2125	-0.0215843		8.2075	0.00638515
8.87046	3.23779		8.87046	3.26549		8.87046	3.68538			8.2177	0.0167266		8.21917	-0.0205189		8.21417	0.00543147
8.87766	3.24233		8.87766	3.27127		8.87766	3.70864			8.22437	0.0172555		8.22583	-0.0193939		8.22083	0.00456721
8.88486	3.24678		8.88486	3.27712		8.88486	3.73495			8.23103	0.0176951		8.2325	-0.0186712		8.2275	0.00365078
8.89206	3.25129		8.89206	3.28273		8.89206	3.76444			8.2377	0.0179484		8.23917	-0.0187233		8.23417	0.00303984
8.89926	3.25603		8.89926	3.28785		8.89926	3.79713			8.24437	0.0178814		8.24583	-0.0194386		8.24083	0.00311434
8.90646	3.26114		8.90646	3.29252		8.90646	3.83288			8.25103	0.017941		8.2525	-0.0204891		8.2475	0.00365824
8.91366	3.2668		8.91366	3.29699		8.91366	3.87146			8.2577	0.0179037		8.25917	-0.0212342		8.25417	0.00445545
8.92086	3.27308		8.92086	3.30166		8.92086	3.91273			8.26437	0.0175908		8.26583	-0.0218078		8.26083	0.00532717
8.92806	3.27994		8.92806	3.30686		8.92806	3.95674			8.27103	0.017263		8.2725	-0.0223219		8.2675	0.00607967
8.93526	3.28715		8.93526	3.31286		8.93526	4.00373			8.2777	0.0169203		8.27917	-0.0225455		8.27417	0.00631809
8.94246	3.29432		8.94246	3.31982		8.94246	4.05406			8.28437	0.0165924		8.28583	-0.0226051		8.28083	0.00560284
8.94966	3.30108		8.94966	3.32785		8.94966	4.10823			8.29103	0.0159591		8.2925	-0.0226945		8.2875	0.004448
8.95686	3.3073		8.95686	3.33696		8.95686	4.16688			8.2977	0.0151917		8.29917	-0.0228807		8.29417	0.00304729
8.96406	3.31321		8.96406	3.34707		8.96406	4.23086			8.30437	0.0147521		8.30583	-0.0229031		8.30083	0.00181049
8.97126	3.31938		8.97126	3.35794		8.97126	4.30111			8.31103	0.0144467		8.3125	-0.0226647		8.3075	0.00111014
8.97846	3.32652		8.97846	3.36928		8.97846	4.37842			8.3177	0.01432		8.31917	-0.0227466		8.31417	0.00117719
8.98566	3.33533		8.98566	3.38091		8.98566	4.46334			8.32437	0.0144541		8.32583	-0.0234917		8.32083	0.00184029
8.99286	3.34651		8.99286	3.3928		8.99286	4.55626			8.33103	0.0147149		8.3325	-0.0244081		8.3275	0.00254065
9.00006	3.36067		9.00006	3.40518		9.00006	4.65755			8.3377	0.0150055		8.33917	-0.025332		8.33417	0.0032559
9.00726	3.37819		9.00726	3.41842		9.00726	4.76773			8.34437	0.0154376		8.34583	-0.026226		8.34083	0.00397116
9.01446	3.39906		9.01446	3.43283		9.01446	4.88735			8.35103	0.0164434		8.3525	-0.0267401		8.3475	0.00436604
9.02166	3.42287		9.02166	3.44868		9.02166	5.01704			8.3577	0.0174716		8.35917	-0.026755		8.35417	0.00397861
9.02886	3.44907		9.02886	3.46617		9.02886	5.15753			8.36437	0.0175387		8.36583	-0.026226		8.36083	0.00333786
9.03606	3.47718		9.03606	3.48558		9.03606	5.30971			8.37103	0.0167191		8.3725	-0.0256449		8.3675	0.00332296
9.04326	3.50698		9.04326	3.50721		9.04326	5.47463			8.3777	0.0159517		8.37917	-0.0248328		8.37417	0.00393391
9.05046	3.53842		9.05046	3.53122		9.05046	5.65343			8.38437	0.0155494		8.38583	-0.0238568		8.38083	0.0044778
9.05766	3.57146		9.05766	3.55759		9.05766	5.84718			8.39103	0.0148714		8.3925	-0.0231341		8.3875	0.00484288
9.06486	3.60606		9.06486	3.5863		9.06486	6.05687			8.3977	0.0142381		8.39917	-0.0222698		8.39417	0.00542402
9.07206	3.64224		9.07206	3.61734		9.07206	6.28334			8.40437	0.0142306		8.40583	-0.0212938		8.40083	0.0064522
9.07926	3.68014		9.07926	3.65089		9.07926	6.52726			8.41103	0.0149459		8.4125	-0.0205189		8.4075	0.00743568
9.08646	3.71986		9.08646	3.68714		9.08646	6.78919			8.4177	0.015907		8.41917	-0.0204965		8.41417	0.00801682
9.09366	3.76144		9.09366	3.7262		9.09366	7.06967			8.42437	0.0168607		8.42583	-0.0209734		8.42083	0.00809878
9.10086	3.80482		9.10086	3.76806		9.10086	7.36939			8.43103	0.0175536		8.4325	-0.0214353		8.4275	0.00802428
9.10806	3.84999		9.10806	3.81265		9.10806	7.68908			8.4377	0.0175834		8.43917	-0.021778		8.43417	0.00828505
9.11526	3.89709		9.11526	3.85991		9.11526	8.02938			8.44437	0.017263		8.44583	-0.0219867		8.44083	0.00865012
9.12246	3.94647		9.12246	3.90979		9.12246	8.39086			8.45103	0.0174642		8.4525	-0.0219271		8.4475	0.00876933
9.12966	3.99855		9.12966	3.96225		9.12966	8.77395			8.4577	0.0178739		8.45917	-0.021562		8.45417	0.00887364
9.13686	4.05373		9.13686	4.01718		9.13686	9.17919			8.46437	0.017792		8.46583	-0.0212565		8.46083	0.00955909
9.14406	4.11223		9.14406	4.07451		9.14406	9.6069			8.47103	0.0174716		8.4725	-0.0210255		8.4675	0.0105128
9.15126	4.17407		9.15126	4.13432		9.15126	10.057			8.4777	0.0173971		8.47917	-0.0207648		8.47417	0.0107437
9.15846	4.23911		9.15846	4.19676		9.15846	10.5287			8.48437	0.0177026		8.48583	-0.0201315		8.48083	0.0103191
9.16566	4.30697		9.16566	4.26204		9.16566	11.0207			8.49103	0.0173822		8.4925	-0.0193492		8.4875	0.0102222
9.17286	4.37711		9.17286	4.33016		9.17286	11.5315			8.4977	0.0165552		8.49917	-0.0190362		8.49417	0.0105277
9.18006	4.44893		9.18006	4.40093		9.18006	12.0595			8.50437	0.0158474		8.50583	-0.0191703		8.50083	0.010483
9.18726	4.52179		9.18726	4.47403		9.18726	12.6033			8.51103	0.0159219		8.5125	-0.0198409		8.5075	0.00984222
9.19446	4.59521		9.19446	4.54911		9.19446	13.1618			8.5177	0.0167638		8.51917	-0.0206456		8.51417	0.00968575
9.20166	4.66887		9.20166	4.62572		9.20166	13.7343			8.52437	0.017941		8.52583	-0.0217631		8.52083	0.0104308
9.20886	4.74262		9.20886	4.7033		9.20886	14.3206			8.53103	0.0193194		8.5325	-0.0227541		8.5275	0.0113994
9.21606	4.81648		9.21606	4.78127		9.21606	14.9212			8.5377	0.0208989		8.53917	-0.0232831		8.53417	0.0118464
9.22326	4.89054		9.22326	4.85916		9.22326	15.5362			8.54437	0.0223219		8.54583	-0.0233203		8.54083	0.0122041
9.23046	4.96498		9.23046	4.93679		9.23046	16.1654			8.55103	0.0230521		8.5525	-0.0230744		8.5475	0.0128597
9.23766	5.03991		9.23766	5.01416		9.23766	16.8082			8.5577	0.0228882		8.55917	-0.0227764		8.55417	0.0131354
9.24486	5.11531		9.24486	5.09128		9.24486	17.4633			8.56437	0.0221282		8.56583	-0.022307		8.56083	0.0125468
9.25206	5.191		9.25206	5.16806		9.25206	18.1289			8.57103	0.0209287		8.5725	-0.0216812		8.5675	0.0113845
9.25926	5.26671		9.25926	5.24439		9.25926	18.8031			8.5777	0.019297		8.57917	-0.0210404		8.57417	0.0104904
9.26646	5.34214		9.26646	5.32025		9.26646	19.4838			8.58437	0.0175238		8.58583	-0.0207946		8.58083	0.00983477
9.27366	5.41707		9.27366	5.39556		9.27366	20.1693			8.59103	0.0159293		8.5925	-0.0206977		8.5875	0.00935048
9.28086	5.49127		9.28086	5.46998		9.28086	20.8583			8.5977	0.0150204		8.59917	-0.0206307		8.59417	0.00911951
9.28806	5.56453		9.28806	5.54298		9.28806	21.5502			8.60437	0.0144988		8.60583	-0.0202283		8.60083	0.00920892
9.29526	5.63668		9.29526	5.61389		9.29526	22.245			8.61103	0.0143871		8.6125	-0.019975		8.6075	0.0096783
9.30246	5.70759		9.30246	5.68236		9.30246	22.9428			8.6177	0.0145584		8.61917	-0.0200197		8.61417	0.0105649
9.30966	5.77729		9.30966	5.74837		9.30966	23.6441			8.62437	0.0151098		8.62583	-0.0200793		8.62083	0.0118613
9.31686	5.8458		9.31686	5.8121		9.31686	24.3491			8.63103	0.0159889		8.6325	-0.0200048		8.6275	0.0130907
9.32406	5.91299		9.32406	5.87375		9.32406	25.058			8.6377	0.0170022		8.63917	-0.019908		8.63417	0.0140294
9.33126	5.97862		9.33126	5.9336		9.33126	25.7703			8.64437	0.0179037		8.64583	-0.0201166		8.64083	0.0145435
9.33846	6.04236		9.33846	5.99209		9.33846	26.4848			8.65103	0.0186041		8.6525	-0.0204444		8.6475	0.014618
9.34566	6.10389		9.34566	6.04978		9.34566	27.2003			8.6577	0.0189468		8.65917	-0.020735		8.65417	0.0142083
9.35286	6.16294		9.35286	6.10718		9.35286	27.9151			8.66437	0.0191331		8.66583	-0.0210851		8.66083	0.0137091
9.36006	6.21929		9.36006	6.16442		9.36006	28.6278			8.67103	0.0190958		8.6725	-0.0216886		8.6675	0.0134483
9.36726	6.27279		9.36726	6.22127		9.36726	29.3371			8.6777	0.0185892		8.67917	-0.0225082		8.67417	0.0136122
9.37446	6.32344		9.37446	6.27733		9.37446	30.0418			8.68437	0.018023		8.68583	-0.0236332		8.68083	0.0139922
9.38166	6.37134		9.38166	6.33222		9.38166	30.7411			8.69103	0.0176281		8.6925	-0.024952		8.6875	0.0142381
9.38886	6.41667		9.38886	6.38564		9.38886	31.4348			8.6977	0.0175908		8.69917	-0.0258237		8.69417	0.0141039
9.39606	6.45969		9.39606	6.43737		9.39606	32.1232			8.70437	0.0177398		8.70583	-0.0255629		8.70083	0.0136197
9.40326	6.50063		9.40326	6.48717		9.40326	32.8071			8.71103	0.0179484		8.7125	-0.0241846		8.7075	0.0129491
9.41046	6.53965		9.41046	6.5349		9.41046	33.4872			8.7177	0.0182018		8.71917	-0.0225157		8.71417	0.0118762
9.41766	6.57679		9.41766	6.58054		9.41766	34.1637			8.72437	0.018321		8.72583	-0.0211522		8.72083	0.0106096
9.42486	6.61202		9.42486	6.62416		9.42486	34.8367			8.73103	0.0183135		8.7325	-0.0200793		8.7275	0.00952929
9.43206	6.64537		9.43206	6.66578		9.43206	35.5056			8.7377	0.0182092		8.73917	-0.0194162		8.73417	0.00910461
9.43926	6.67708		9.43926	6.70536		9.43926	36.1696			8.74437	0.0177324		8.74583	-0.0193641		8.74083	0.00900775
9.44646	6.7075		9.44646	6.74278		9.44646	36.828			8.75103	0.0171512		8.7525	-0.0199303		8.7475	0.00890344
9.45366	6.73705		9.45366	6.77807		9.45366	37.4794			8.7577	0.0169426		8.75917	-0.0204444		8.75417	0.00883639
9.46086	6.76606		9.46086	6.81152		9.46086	38.1222			8.76437	0.0172704		8.76583	-0.0205263		8.76083	0.00923127
9.46806	6.7948		9.46806	6.84353		9.46806	38.7553			8.77103	0.0176579		8.7725	-0.0202879		8.7675	0.0101104
9.47526	6.82349		9.47526	6.87459		9.47526	39.3785			8.7777	0.0178665		8.77917	-0.0202134		8.77417	0.010781
9.48246	6.85222		9.48246	6.90508		9.48246	39.9933			8.78437	0.0183657		8.78583	-0.0203028		8.78083	0.010848
9.48966	6.88102		9.48966	6.93537		9.48966	40.6016			8.79103	0.019297		8.7925	-0.0203624		8.7875	0.0109151
9.49686	6.90976		9.49686	6.96568		9.49686	41.2055			8.7977	0.0203624		8.79917	-0.0205338		8.79417	0.0118092
9.50406	6.9383		9.50406	6.99615		9.50406	41.8071			8.80437	0.0210404		8.80583	-0.0211149		8.80083	0.0132993
9.51126	6.96656		9.51126	7.02676		9.51126	42.4084			8.81103	0.0215471		8.8125	-0.0223592		8.8075	0.0145808
9.51846	6.99456		9.51846	7.0573		9.51846	43.011			8.8177	0.0220016		8.81917	-0.0237599		8.81417	0.0158027
9.52566	7.02244		9.52566	7.08753		9.52566	43.6155			8.82437	0.021942		8.82583	-0.0249371		8.82083	0.0172481
9.53286	7.0504		9.53286	7.11728		9.53286	44.2218			8.83103	0.020951		8.8325	-0.0257194		8.8275	0.0185221
9.54006	7.07859		9.54006	7.14658		9.54006	44.8289			8.8377	0.0194088		8.83917	-0.0263453		8.83417	0.0185966
9.54726	7.10707		9.54726	7.17562		9.54726	45.4354			8.84437	0.0181049		8.84583	-0.0262782		8.84083	0.0175536
9.55446	7.13573		9.55446	7.20458		9.55446	46.0393			8.85103	0.0173897		8.8525	-0.0251457		8.8475	0.0164509
9.56166	7.16442		9.56166	7.23351		9.56166	46.6386			8.8577	0.0171363		8.85917	-0.0235066		8.85417	0.0157431
9.56886	7.19302		9.56886	7.26246		9.56886	47.2315			8.86437	0.0173599		8.86583	-0.022389		8.86083	0.0154451
9.57606	7.22143		9.57606	7.29147		9.57606	47.8168			8.87103	0.0181049		8.8725	-0.0218228		8.8675	0.0154227
9.58326	7.24958		9.58326	7.32075		9.58326	48.3935			8.8777	0.0187755		8.87917	-0.0209212		8.87417	0.0163019
9.59046	7.27741		9.59046	7.35046		9.59046	48.96			8.88437	0.0192001		8.88583	-0.0200123		8.88083	0.0178963
9.59766	7.30484		9.59766	7.38057		9.59766	49.5144			8.89103	0.019148		8.8925	-0.019595		8.8875	0.0194162
9.60486	7.33193		9.60486	7.41084		9.60486	50.0551			8.8977	0.0189096		8.89917	-0.0194386		8.89417	0.0201166
9.61206	7.35879		9.61206	7.44089		9.61206	50.5818			8.90437	0.0186861		8.90583	-0.0189096		8.90083	0.0205263
9.61926	7.38564		9.61926	7.47048		9.61926	51.0957			8.91103	0.0184625		8.9125	-0.018239		8.9075	0.0213459
9.62646	7.41274		9.62646	7.49947		9.62646	51.5982			8.9177	0.0187084		8.91917	-0.0180528		8.91417	0.0227168
9.63366	7.44032		9.63366	7.52779		9.63366	52.0904			8.92437	0.0191629		8.92583	-0.0181571		8.92083	0.024192
9.64086	7.46856		9.64086	7.55542		9.64086	52.5735			8.93103	0.0196844		8.9325	-0.0181645		8.9275	0.0254586
9.64806	7.49747		9.64806	7.58247		9.64806	53.0485			8.9377	0.0200048		8.93917	-0.0180826		8.93417	0.0267699
9.65526	7.52691		9.65526	7.60932		9.65526	53.5168			8.94437	0.0204742		8.94583	-0.018321		8.94083	0.0282452
9.66246	7.55674		9.66246	7.63661		9.66246	53.9785			8.95103	0.0213832		8.9525	-0.0188425		8.9475	0.0298843
9.66966	7.58681		9.66966	7.66512		9.66966	54.4326			8.9577	0.0221208		8.95917	-0.0194311		8.95417	0.0312552
9.67686	7.61703		9.67686	7.69554		9.67686	54.8774			8.96437	0.0226721		8.96583	-0.019826		8.96083	0.032492
9.68406	7.64729		9.68406	7.72832		9.68406	55.3112			8.97103	0.0233278		8.9725	-0.0199527		8.9675	0.0340492
9.69126	7.67764		9.69126	7.76366		9.69126	55.733			8.9777	0.024341		8.97917	-0.0200123		8.97417	0.0363961
9.69846	7.70831		9.69846	7.80153		9.69846	56.1429			8.98437	0.0248626		8.98583	-0.0195876		8.98083	0.0387281
9.70566	7.73987		9.70566	7.84167		9.70566	56.5414			8.99103	0.0247136		8.9925	-0.0187606		8.9875	0.0403747
9.71286	7.77304		9.71286	7.88357		9.71286	56.9289			8.9977	0.0243187		8.99917	-0.0179037		8.99417	0.0416413
9.72006	7.80845		9.72006	7.92649		9.72006	57.3058			9.00437	0.0237152		9.00583	-0.0176057		9.00083	0.0435859
9.72726	7.84629		9.72726	7.96965		9.72726	57.6716			9.01103	0.0226498		9.0125	-0.0177473		9.0075	0.04673
9.73446	7.88633		9.73446	8.01234		9.73446	58.0249			9.0177	0.0214353		9.01917	-0.0178218		9.01417	0.0506192
9.74166	7.92801		9.74166	8.05405		9.74166	58.3641			9.02437	0.0208616		9.02583	-0.0178143		9.02083	0.0552088
9.74886	7.97068		9.74886	8.0945		9.74886	58.6881			9.03103	0.0209734		9.0325	-0.0174567		9.0275	0.0602603
9.75606	8.01371		9.75606	8.13363		9.75606	58.9965			9.0377	0.0209808		9.03917	-0.0163987		9.03417	0.0656247
9.76326	8.05648		9.76326	8.17161		9.76326	59.2902			9.04437	0.0209659		9.04583	-0.0145659		9.04083	0.0708923
9.77046	8.09842		9.77046	8.20885		9.77046	59.5713			9.05103	0.0216737		9.0525	-0.0122041		9.0475	0.0759289
9.77766	8.13918		9.77766	8.24591		9.77766	59.8424			9.0577	0.0231788		9.05917	-0.0095889		9.05417	0.0809953
9.78486	8.1787		9.78486	8.28339		9.78486	60.1067			9.06437	0.0249967		9.06583	-0.00692904		9.06083	0.0861287
9.79206	8.21735		9.79206	8.32193		9.79206	60.3671			9.07103	0.026539		9.0725	-0.00496209		9.0675	0.0918135
9.79926	8.25575		9.79926	8.36211		9.79926	60.6245			9.0777	0.0287071		9.07917	-0.00404567		9.07417	0.0981092
9.80646	8.29461		9.80646	8.40442		9.80646	60.877			9.08437	0.0313744		9.08583	-0.00362843		9.08083	0.104904
9.81366	8.33464		9.81366	8.44913		9.81366	61.12			9.09103	0.0341013		9.0925	-0.00329316		9.0875	0.111997
9.82086	8.37635		9.82086	8.49621		9.82086	61.3476			9.0977	0.0362396		9.09917	-0.00287592		9.09417	0.119343
9.82806	8.42018		9.82806	8.54536		9.82806	61.5538			9.10437	0.0378862		9.10583	-0.00236928		9.10083	0.127263
9.83526	8.46639		9.83526	8.59617		9.83526	61.7341			9.11103	0.0395328		9.1125	-0.00144541		9.1075	0.135787
9.84246	8.51513		9.84246	8.64822		9.84246	61.8859			9.1177	0.0411049		9.11917	-0.000149012		9.11417	0.144951
9.84966	8.56625		9.84966	8.70101		9.84966	62.0097			9.12437	0.0426248		9.12583	0.00110269		9.12083	0.154801
9.85686	8.6193		9.85686	8.75391		9.85686	62.1084			9.13103	0.0439361		9.1325	0.00220537		9.1275	0.165269
9.86406	8.6735		9.86406	8.80622		9.86406	62.1872			9.1377	0.0452772		9.13917	0.00335276		9.13417	0.176087
9.87126	8.72802		9.87126	8.85741		9.87126	62.2521			9.14437	0.046894		9.14583	0.00461936		9.14083	0.187315
9.87846	8.78222		9.87846	8.90737		9.87846	62.3078			9.15103	0.0488609		9.1525	0.00609457		9.1475	0.198931
9.88566	8.83579		9.88566	8.9564		9.88566	62.357			9.1577	0.0506192		9.15917	0.00783056		9.15417	0.210851
9.89286	8.88869		9.89286	9.005		9.89286	62.3999			9.16437	0.0520498		9.16583	0.00952929		9.16083	0.222966
9.90006	8.94113		9.90006	9.05375		9.90006	62.4347			9.17103	0.0532866		9.1725	0.0110865		9.1675	0.235282
9.90726	8.99356		9.90726	9.10326		9.90726	62.4584			9.1777	0.0545681		9.17917	0.0125915		9.17417	0.248052
9.91446	9.04669		9.91446	9.15415		9.91446	62.4675			9.18437	0.0556484		9.18583	0.0145659		9.18083	0.26115
9.92166	9.10131		9.92166	9.20696		9.92166	62.4592			9.19103	0.0563115		9.1925	0.0169724		9.1875	0.274904
9.92886	9.15813		9.92886	9.26196		9.92886	62.433			9.1977	0.0571758		9.19917	0.0194386		9.19417	0.289515
9.93606	9.21748		9.93606	9.31895		9.93606	62.3905			9.20437	0.0585765		9.20583	0.0216737		9.20083	0.304773
9.94326	9.27937		9.94326	9.37736		9.94326	62.3353			9.21103	0.0602826		9.2125	0.0236481		9.2075	0.320211
9.95046	9.3435		9.95046	9.43643		9.95046	62.2716			9.2177	0.0616908		9.21917	0.0253618		9.21417	0.335373
9.95766	9.40931		9.95766	9.49552		9.95766	62.2026			9.22437	0.0629723		9.22583	0.0266358		9.22083	0.350572
9.96486	9.47604		9.96486	9.55421		9.96486	62.1308			9.23103	0.0647306		9.2325	0.0275373		9.2275	0.365883
9.97206	9.54267		9.97206	9.61234		9.97206	62.0578			9.2377	0.0670031		9.23917	0.0284612		9.23417	0.381269
9.97926	9.6082		9.97926	9.6699		9.97926	61.9844			9.24437	0.0696033		9.24583	0.0299588		9.24083	0.396609
9.98646	9.67183		9.98646	9.72704		9.98646	61.9104			9.25103	0.0722259		9.2525	0.0320598		9.2475	0.412337
9.99366	9.73312		9.99366	9.78405		9.99366	61.8344			9.2577	0.0747442		9.25917	0.0343621		9.25417	0.428952
10.0009	9.79208		10.0009	9.84147		10.0009	61.7541			9.26437	0.0767335		9.26583	0.0364929		9.26083	0.44629
10.0081	9.84914		10.0081	9.89994		10.0081	61.6668			9.27103	0.0780672		9.2725	0.038363		9.2675	0.46403
10.0153	9.90497		10.0153	9.96009		10.0153	61.5698			9.2777	0.0789016		9.27917	0.0399947		9.27417	0.481859
10.0225	9.96062		10.0225	10.0223		10.0225	61.4608			9.28437	0.0795797		9.28583	0.0413507		9.28083	0.499964
10.0297	10.0173		10.0297	10.0864		10.0297	61.3378			9.29103	0.0802651		9.2925	0.042744		9.2875	0.517897
10.0369	10.0762		10.0369	10.1524		10.0369	61.199			9.2977	0.0809506		9.29917	0.0444055		9.29417	0.535309
10.0441	10.1384		10.0441	10.2198		10.0441	61.043			9.30437	0.081867		9.30583	0.0461563		9.30083	0.55214
10.0513	10.2041		10.0513	10.2885		10.0513	60.8693			9.31103	0.0828952		9.3125	0.0477061		9.3075	0.568554
10.0585	10.2732		10.0585	10.3581		10.0585	60.6785			9.3177	0.0842512		9.31917	0.0493154		9.31417	0.585005
10.0657	10.345		10.0657	10.4281		10.0657	60.4724			9.32437	0.085786		9.32583	0.0512525		9.32083	0.601709
10.0729	10.4185		10.0729	10.4976		10.0729	60.2533			9.33103	0.0876114		9.3325	0.0532642		9.3275	0.618927
10.0801	10.4925		10.0801	10.5662		10.0801	60.0239			9.3377	0.089936		9.33917	0.0549257		9.33417	0.636652
10.0873	10.5661		10.0873	10.6336		10.0873	59.7865			9.34437	0.0923052		9.34583	0.0564978		9.34083	0.65431
10.0945	10.6381		10.0945	10.6997		10.0945	59.5432			9.35103	0.0942722		9.3525	0.0579655		9.3475	0.671722
10.1017	10.7081		10.1017	10.7648		10.1017	59.2954			9.3577	0.0952631		9.35917	0.059098		9.35417	0.688955
10.1089	10.7759		10.1089	10.8287		10.1089	59.0441			9.36437	0.0957102		9.36583	0.0596792		9.36083	0.705741
10.1161	10.8419		10.1161	10.8917		10.1161	58.79			9.37103	0.0961795		9.3725	0.0600889		9.3675	0.721797
10.1233	10.9068		10.1233	10.954		10.1233	58.5333			9.3777	0.0966862		9.37917	0.0603795		9.37417	0.737049
10.1305	10.9713		10.1305	11.016		10.1305	58.2736			9.38437	0.0971854		9.38583	0.0603199		9.38083	0.752486
10.1377	11.036		10.1377	11.078		10.1377	58.0099			9.39103	0.0977889		9.3925	0.0603497		9.3875	0.768758
10.1449	11.1012		10.1449	11.1399		10.1449	57.741			9.3977	0.0987798		9.39917	0.0609383		9.39417	0.785433
10.1521	11.1667		10.1521	11.2013		10.1521	57.4663			9.40437	0.0999346		9.40583	0.0622943		9.40083	0.802271
10.1593	11.2322		10.1593	11.2616		10.1593	57.1857			9.41103	0.100754		9.4125	0.0639111		9.4075	0.819571
10.1665	11.2974		10.1665	11.3203		10.1665	56.8995			9.4177	0.101484		9.41917	0.0656843		9.41417	0.837602
10.1737	11.3615		10.1737	11.3775		10.1737	56.6082			9.42437	0.102513		9.42583	0.0676364		9.42083	0.855953
10.1809	11.4242		10.1809	11.4331		10.1809	56.312			9.43103	0.104055		9.4325	0.0696853		9.4275	0.873923
10.1881	11.4848		10.1881	11.4871		10.1881	56.011			9.4377	0.105679		9.43917	0.0712797		9.43417	0.891492
10.1953	11.5432		10.1953	11.5395		10.1953	55.7059			9.44437	0.107132		9.44583	0.0721365		9.44083	0.908814
10.2025	11.5994		10.2025	11.5907		10.2025	55.3971			9.45103	0.108197		9.4525	0.0721887		9.4475	0.925966
10.2097	11.6538		10.2097	11.6409		10.2097	55.0846			9.4577	0.108682		9.45917	0.0718981		9.45417	0.943176
10.2169	11.707		10.2169	11.6907		10.2169	54.7677			9.46437	0.108853		9.46583	0.071831		9.46083	0.960432
10.2241	11.7596		10.2241	11.7401		10.2241	54.4451			9.47103	0.109017		9.4725	0.0720695		9.4675	0.97762
10.2313	11.8119		10.2313	11.7888		10.2313	54.1162			9.4777	0.109397		9.47917	0.0727475		9.47417	0.994824
10.2385	11.8639		10.2385	11.8366		10.2385	53.7812			9.48437	0.109844		9.48583	0.0740662		9.48083	1.01236
10.2457	11.9151		10.2457	11.8832		10.2457	53.4407			9.49103	0.110604		9.4925	0.0760257		9.4875	1.03001
10.2529	11.9649		10.2529	11.9284		10.2529	53.0959			9.4977	0.111789		9.49917	0.0783503		9.49417	1.04741
10.2601	12.0125		10.2601	11.972		10.2601	52.7478			9.50437	0.113457		9.50583	0.0805482		9.50083	1.0644
10.2673	12.0567		10.2673	12.014		10.2673	52.3972			9.51103	0.115179		9.5125	0.0825375		9.5075	1.08124
10.2745	12.0966		10.2745	12.0542		10.2745	52.0442			9.5177	0.116669		9.51917	0.0841096		9.51417	1.09785
10.2817	12.1314		10.2817	12.0926		10.2817	51.6885			9.52437	0.117771		9.52583	0.0850484		9.52083	1.11437
10.2889	12.1608		10.2889	12.1287		10.2889	51.329			9.53103	0.11836		9.5325	0.0859573		9.5275	1.13099
10.2961	12.1851		10.2961	12.162		10.2961	50.9644			9.5377	0.118762		9.53917	0.0870675		9.53417	1.14786
10.3033	12.2052		10.3033	12.1921		10.3033	50.5938			9.54437	0.118822		9.54583	0.0881925		9.54083	1.16498
10.3105	12.2224		10.3105	12.2185		10.3105	50.2164			9.55103	0.118963		9.5525	0.088796		9.5475	1.18209
10.3177	12.238		10.3177	12.2407		10.3177	49.8318			9.5577	0.119373		9.55917	0.0891313		9.55417	1.19877
10.3249	12.2528		10.3249	12.2588		10.3249	49.4405			9.56437	0.119835		9.56583	0.0895336		9.56083	1.21462
10.3321	12.2671		10.3321	12.2729		10.3321	49.0434			9.57103	0.120215		9.5725	0.0899434		9.5675	1.22999
10.3393	12.2807		10.3393	12.2833		10.3393	48.642			9.5777	0.12029		9.57917	0.0900924		9.57417	1.24545
10.3465	12.2931		10.3465	12.2905		10.3465	48.2383			9.58437	0.120595		9.58583	0.0903979		9.58083	1.26113
10.3537	12.3029		10.3537	12.2952		10.3537	47.8343			9.59103	0.120953		9.5925	0.0916272		9.5875	1.27669
10.3609	12.3089		10.3609	12.2978		10.3609	47.4322			9.5977	0.121482		9.59917	0.0936761		9.59417	1.2925
10.3681	12.3096		10.3681	12.2982		10.3681	47.0337			9.60437	0.122622		9.60583	0.0958517		9.60083	1.30849
10.3753	12.3044		10.3753	12.2964		10.3753	46.6401			9.61103	0.124492		9.6125	0.0973791		9.6075	1.32462
10.3825	12.2931		10.3825	12.292		10.3825	46.252			9.6177	0.12698		9.61917	0.0986233		9.61417	1.34026
10.3897	12.2767		10.3897	12.2848		10.3897	45.8695			9.62437	0.129662		9.62583	0.0996441		9.62083	1.35548
10.3969	12.2564		10.3969	12.2747		10.3969	45.4919			9.63103	0.132166		9.6325	0.100702		9.6275	1.37077
10.4041	12.2336		10.4041	12.2615		10.4041	45.118			9.6377	0.134051		9.63917	0.101373		9.63417	1.38617
10.4113	12.2097		10.4113	12.2451		10.4113	44.7458			9.64437	0.135109		9.64583	0.102006		9.64083	1.40148
10.4185	12.1856		10.4185	12.2256		10.4185	44.3741			9.65103	0.135638		9.6525	0.103101		9.6475	1.41615
10.4257	12.1619		10.4257	12.2032		10.4257	44.0021			9.6577	0.136115		9.65917	0.104681		9.65417	1.43035
10.4329	12.1388		10.4329	12.1784		10.4329	43.6298			9.66437	0.136741		9.66583	0.106156		9.66083	1.4445
10.4401	12.1157		10.4401	12.1512		10.4401	43.2577			9.67103	0.137575		9.6725	0.106744		9.6675	1.45847
10.4473	12.0918		10.4473	12.1218		10.4473	42.8864			9.6777	0.138529		9.67917	0.107333		9.67417	1.47202
10.4545	12.0658		10.4545	12.0902		10.4545	42.5162			9.68437	0.139683		9.68583	0.108585		9.68083	1.48502
10.4617	12.0368		10.4617	12.0563		10.4617	42.1468			9.69103	0.140809		9.6925	0.110574		9.6875	1.49798
10.4689	12.0041		10.4689	12.0199		10.4689	41.7776			9.6977	0.141643		9.69917	0.112526		9.69417	1.51101
10.4761	11.9674		10.4761	11.9811		10.4761	41.4075			9.70437	0.141948		9.70583	0.114366		9.70083	1.52357
10.4833	11.9262		10.4833	11.94		10.4833	41.0356			9.71103	0.142246		9.7125	0.116095		9.7075	1.5354
10.4905	11.8805		10.4905	11.8967		10.4905	40.6608			9.7177	0.143185		9.71917	0.117563		9.71417	1.54713
10.4977	11.8305		10.4977	11.8513		10.4977	40.2822			9.72437	0.145011		9.72583	0.118874		9.72083	1.55929
10.5049	11.7764		10.5049	11.804		10.5049	39.8997			9.73103	0.147335		9.7325	0.120044		9.7275	1.57161
10.5121	11.7188		10.5121	11.7546		10.5121	39.5139			9.7377	0.149928		9.73917	0.121154		9.73417	1.58296
10.5193	11.6579		10.5193	11.7032		10.5193	39.1266			9.74437	0.15267		9.74583	0.122152		9.74083	1.59317
10.5265	11.594		10.5265	11.6497		10.5265	38.7397			9.75103	0.155255		9.7525	0.123665		9.7475	1.60301
10.5337	11.5275		10.5337	11.5941		10.5337	38.355			9.7577	0.157326		9.75917	0.125825		9.75417	1.61254
10.5409	11.4591		10.5409	11.536		10.5409	37.9733			9.76437	0.158809		9.76583	0.12783		9.76083	1.6217
10.5481	11.389		10.5481	11.4751		10.5481	37.5955			9.77103	0.160024		9.7725	0.129253		9.7675	1.63002
10.5553	11.3178		10.5553	11.4113		10.5553	37.2223			9.7777	0.161044		9.77917	0.130452		9.77417	1.63826
10.5625	11.2455		10.5625	11.3445		10.5625	36.8544			9.78437	0.161946		9.78583	0.132173		9.78083	1.64673
10.5697	11.1722		10.5697	11.2751		10.5697	36.4921			9.79103	0.163004		9.7925	0.134341		9.7875	1.65518
10.5769	11.0982		10.5769	11.2034		10.5769	36.1354			9.7977	0.164129		9.79917	0.13642		9.79417	1.6636
10.5841	11.0237		10.5841	11.1297		10.5841	35.7836			9.80437	0.165202		9.80583	0.13838		9.80083	1.6717
10.5913	10.9487		10.5913	11.0544		10.5913	35.4364			9.81103	0.166476		9.8125	0.140332		9.8075	1.67973
10.5985	10.8734		10.5985	10.9779		10.5985	35.0932			9.8177	0.168256		9.81917	0.142306		9.81417	1.68748
10.6057	10.7982		10.6057	10.9008		10.6057	34.7533			9.82437	0.170819		9.82583	0.144228		9.82083	1.69489
10.6129	10.7232		10.6129	10.8236		10.6129	34.4157			9.83103	0.173517		9.8325	0.145905		9.8275	1.70185
10.6201	10.6487		10.6201	10.7463		10.6201	34.0793			9.8377	0.17605		9.83917	0.147678		9.83417	1.70798
10.6273	10.5748		10.6273	10.6689		10.6273	33.7434			9.84437	0.178315		9.84583	0.149354		9.84083	1.71354
10.6345	10.5013		10.6345	10.5914		10.6345	33.4081			9.85103	0.180431		9.8525	0.150859		9.8475	1.71899
10.6417	10.4277		10.6417	10.5136		10.6417	33.0738			9.8577	0.182867		9.85917	0.152171		9.85417	1.72447
10.6489	10.3533		10.6489	10.4357		10.6489	32.7414			9.86437	0.185303		9.86583	0.153512		9.86083	1.72965
10.6561	10.2775		10.6561	10.3579		10.6561	32.4116			9.87103	0.187613		9.8725	0.155091		9.8675	1.73435
10.6633	10.1995		10.6633	10.2801		10.6633	32.0846			9.8777	0.189885		9.87917	0.156611		9.87417	1.73879
10.6705	10.1188		10.6705	10.2026		10.6705	31.7605			9.88437	0.192448		9.88583	0.158772		9.88083	1.74308
10.6777	10.0355		10.6777	10.1254		10.6777	31.4388			9.89103	0.195138		9.8925	0.161871		9.8875	1.74675
10.6849	9.94975		10.6849	10.0487		10.6849	31.119			9.8977	0.197187		9.89917	0.165813		9.89417	1.74978
10.6921	9.86211		10.6921	9.9722		10.6921	30.8004			9.90437	0.198655		9.90583	0.16962		9.90083	1.75226
10.6993	9.77357		10.6993	9.89584		10.6993	30.4824			9.91103	0.20048		9.9125	0.172816		9.9075	1.75442
10.7065	9.68533		10.7065	9.81947		10.7065	30.1647			9.9177	0.203051		9.91917	0.175759		9.91417	1.75624
10.7137	9.59858		10.7137	9.74298		10.7137	29.8475			9.92437	0.206009		9.92583	0.178412		9.92083	1.75754
10.7209	9.51429		10.7209	9.66628		10.7209	29.5321			9.93103	0.208668		9.9325	0.18084		9.9275	1.75857
10.7281	9.43309		10.7281	9.58937		10.7281	29.2198			9.9377	0.211045		9.93917	0.182778		9.93417	1.75936
10.7353	9.35525		10.7353	9.5125		10.7353	28.912			9.94437	0.213474		9.94583	0.184648		9.94083	1.75995
10.7425	9.28065		10.7425	9.43611		10.7425	28.6097			9.95103	0.215188		9.9525	0.186846		9.9475	1.76058
10.7497	9.20874		10.7497	9.36075		10.7497	28.3131			9.9577	0.216059		9.95917	0.189416		9.95417	1.76124
10.7569	9.13863		10.7569	9.28683		10.7569	28.0217			9.96437	0.216655		9.96583	0.191942		9.96083	1.76214
10.7641	9.0692		10.7641	9.2145		10.7641	27.7342			9.97103	0.218183		9.9725	0.19408		9.9675	1.7629
10.7713	8.99947		10.7713	9.14366		10.7713	27.4488			9.9777	0.220664		9.97917	0.19592		9.97417	1.76352
10.7785	8.92873		10.7785	9.0741		10.7785	27.164			9.98437	0.223726		9.98583	0.197835		9.98083	1.76386
10.7857	8.85662		10.7857	9.00546		10.7857	26.8787			9.99103	0.227138		9.9925	0.199988		9.9875	1.76331
10.7929	8.78309		10.7929	8.93728		10.7929	26.5928			9.9977	0.230946		9.99917	0.202261		9.99417	1.76129
10.8001	8.70844		10.8001	8.86906		10.8001	26.3068			10.0044	0.234537		10.0058	0.204355		10.0008	1.7577
10.8073	8.63324		10.8073	8.80026		10.8073	26.0222			10.011	0.237398		10.0125	0.205994		10.0075	1.75364
10.8145	8.55839		10.8145	8.73052		10.8145	25.7404			10.0177	0.23973		10.0192	0.207737		10.0142	1.7499
10.8217	8.48475		10.8217	8.65966		10.8217	25.4632			10.0244	0.241674		10.0258	0.209913		10.0208	1.74647
10.8289	8.41297		10.8289	8.58775		10.8289	25.1921			10.031	0.243619		10.0325	0.212207		10.0275	1.74294
10.8361	8.34335		10.8361	8.51513		10.8361	24.9275			10.0377	0.245288		10.0392	0.214085		10.0342	1.73931
10.8433	8.27591		10.8433	8.4423		10.8433	24.6686			10.0444	0.246815		10.0458	0.216015		10.0408	1.73571
10.8505	8.21046		10.8505	8.36989		10.8505	24.4141			10.051	0.248216		10.0525	0.218637		10.0475	1.73189
10.8577	8.14669		10.8577	8.2985		10.8577	24.1625			10.0577	0.249706		10.0592	0.22167		10.0542	1.72765
10.8649	8.08406		10.8649	8.22875		10.8649	23.9126			10.0644	0.251457		10.0658	0.22433		10.0608	1.7228
10.8721	8.02193		10.8721	8.16116		10.8721	23.664			10.071	0.253625		10.0725	0.22684		10.0675	1.71772
10.8793	7.95968		10.8793	8.0961		10.8793	23.4166			10.0777	0.256643		10.0792	0.229537		10.0742	1.71283
10.8865	7.89687		10.8865	8.03363		10.8865	23.1706			10.0844	0.26048		10.0858	0.232331		10.0808	1.70824
10.8937	7.83336		10.8937	7.97336		10.8937	22.9268			10.091	0.264749		10.0925	0.23514		10.0875	1.7034
10.9009	7.76923		10.9009	7.91465		10.9009	22.6861			10.0977	0.268854		10.0992	0.238106		10.0942	1.6974
10.9081	7.70472		10.9081	7.85682		10.9081	22.4491			10.1044	0.272505		10.1058	0.241093		10.1008	1.69059
10.9153	7.64014		10.9153	7.79925		10.9153	22.2157			10.111	0.275768		10.1125	0.243701		10.1075	1.68385
10.9225	7.57591		10.9225	7.74152		10.9225	21.9857			10.1177	0.278369		10.1192	0.246093		10.1142	1.67761
10.9297	7.51243		10.9297	7.68338		10.9297	21.7583			10.1244	0.28009		10.1258	0.248574		10.1208	1.6716
10.9369	7.45005		10.9369	7.62469		10.9369	21.5333			10.131	0.281252		10.1325	0.251159		10.1275	1.66575
10.9441	7.38909		10.9441	7.56547		10.9441	21.3103			10.1377	0.282288		10.1392	0.253573		10.1342	1.66018
10.9513	7.32978		10.9513	7.50588		10.9513	21.0896			10.1444	0.28348		10.1458	0.25624		10.1408	1.65497
10.9585	7.27221		10.9585	7.44621		10.9585	20.8713			10.151	0.284724		10.1525	0.259027		10.1475	1.64949
10.9657	7.21628		10.9657	7.38671		10.9657	20.6561			10.1577	0.286125		10.1592	0.261508		10.1542	1.64314
10.9729	7.16174		10.9729	7.32754		10.9729	20.4446			10.1644	0.288084		10.1658	0.263557		10.1608	1.63592
10.9801	7.10831		10.9801	7.2688		10.9801	20.2371			10.171	0.290066		10.1725	0.265457		10.1675	1.62809
10.9873	7.05586		10.9873	7.21058		10.9873	20.0338			10.1777	0.291705		10.1792	0.267357		10.1742	1.61996
10.9945	7.00433		10.9945	7.15313		10.9945	19.8339			10.1844	0.293113		10.1858	0.26878		10.1808	1.61123
11.0017	6.95366		11.0017	7.09686		11.0017	19.637			10.191	0.294663		10.1925	0.269741		10.1875	1.6019
11.0089	6.90372		11.0089	7.04221		11.0089	19.4423			10.1977	0.296488		10.1992	0.27094		10.1942	1.59237
11.0161	6.85443		11.0161	6.98949		11.0161	19.2498			10.2044	0.298053		10.2058	0.272386		10.2008	1.58302
11.0233	6.80589		11.0233	6.93883		11.0233	19.0593			10.211	0.299871		10.2125	0.273451		10.2075	1.57387
11.0305	6.75836		11.0305	6.89022		11.0305	18.871			10.2177	0.302099		10.2192	0.273861		10.2142	1.56458
11.0377	6.71204		11.0377	6.84359		11.0377	18.6847			10.2244	0.304423		10.2258	0.274181		10.2208	1.5553
11.0449	6.66699		11.0449	6.79873		11.0449	18.5009			10.231	0.306398		10.2325	0.275098		10.2275	1.54666
11.0521	6.62311		11.0521	6.75521		11.0521	18.3202			10.2377	0.307709		10.2392	0.276096		10.2342	1.53852
11.0593	6.58027		11.0593	6.7125		11.0593	18.1429			10.2444	0.30902		10.2458	0.276819		10.2408	1.52994
11.0665	6.53833		11.0665	6.67009		11.0665	17.9694			10.251	0.310011		10.2525	0.277512		10.2475	1.52047
11.0737	6.49709		11.0737	6.62764		11.0737	17.7994			10.2577	0.310607		10.2592	0.278503		10.2542	1.5107
11.0809	6.45629		11.0809	6.58504		11.0809	17.6324			10.2644	0.310689		10.2658	0.279672		10.2608	1.50105
11.0881	6.41568		11.0881	6.54221		11.0881	17.4685			10.271	0.310622		10.2725	0.280589		10.2675	1.49105
11.0953	6.37518		11.0953	6.49908		11.0953	17.3078			10.2777	0.311032		10.2792	0.281177		10.2742	1.48058
11.1025	6.33488		11.1025	6.45558		11.1025	17.1503			10.2844	0.31177		10.2858	0.281855		10.2808	1.47022
11.1097	6.29506		11.1097	6.41173		11.1097	16.9959			10.291	0.312582		10.2925	0.282437		10.2875	1.46038
11.1169	6.25591		11.1169	6.36773		11.1169	16.844			10.2977	0.313014		10.2992	0.282921		10.2942	1.4509
11.1241	6.21759		11.1241	6.32383		11.1241	16.6941			10.3044	0.313275		10.3058	0.283048		10.3008	1.44118
11.1313	6.18019		11.1313	6.28045		11.1313	16.5458			10.311	0.313647		10.3125	0.282787		10.3075	1.43073
11.1385	6.1438		11.1385	6.23802		11.1385	16.3989			10.3177	0.313751		10.3192	0.282414		10.3142	1.41959
11.1457	6.1084		11.1457	6.19704		11.1457	16.2531			10.3244	0.312969		10.3258	0.281878		10.3208	1.40829
11.1529	6.0739		11.1529	6.15785		11.1529	16.1079			10.331	0.311375		10.3325	0.281446		10.3275	1.39705
11.1601	6.04005		11.1601	6.12059		11.1601	15.963			10.3377	0.309601		10.3392	0.280984		10.3342	1.38535
11.1673	6.00664		11.1673	6.08525		11.1673	15.8186			10.3444	0.308141		10.3458	0.280827		10.3408	1.37331
11.1745	5.97357		11.1745	6.05164		11.1745	15.6755			10.351	0.306882		10.3525	0.280924		10.3475	1.36176
11.1817	5.94081		11.1817	6.01951		11.1817	15.5345			10.3577	0.30601		10.3592	0.280775		10.3542	1.35078
11.1889	5.90826		11.1889	5.9884		11.1889	15.3962			10.3644	0.305891		10.3658	0.280418		10.3608	1.33954
11.1961	5.87561		11.1961	5.95772		11.1961	15.2612			10.371	0.306405		10.3725	0.280008		10.3675	1.32783
11.2033	5.84252		11.2033	5.927		11.2033	15.1299			10.3777	0.307061		10.3792	0.279509		10.3742	1.3164
11.2105	5.80876		11.2105	5.89608		11.2105	15.0024			10.3844	0.307247		10.3858	0.278503		10.3808	1.30564
11.2177	5.77441		11.2177	5.86509		11.2177	14.879			10.391	0.307031		10.3925	0.277296		10.3875	1.29488
11.2249	5.73977		11.2249	5.83425		11.2249	14.7592			10.3977	0.306413		10.3992	0.276692		10.3942	1.284
11.2321	5.70515		11.2321	5.80369		11.2321	14.6421			10.4044	0.305034		10.4058	0.276498		10.4008	1.27304
11.2393	5.67089		11.2393	5.77344		11.2393	14.5266			10.411	0.302859		10.4125	0.275783		10.4075	1.26237
11.2465	5.63739		11.2465	5.74353		11.2465	14.4112			10.4177	0.300497		10.4192	0.274315		10.4142	1.25152
11.2537	5.60515		11.2537	5.714		11.2537	14.2952			10.4244	0.298306		10.4258	0.272751		10.4208	1.24015
11.2609	5.57469		11.2609	5.68482		11.2609	14.178			10.431	0.296026		10.4325	0.271216		10.4275	1.22853
11.2681	5.54619		11.2681	5.6558		11.2681	14.0597			10.4377	0.293352		10.4392	0.269212		10.4342	1.21704
11.2753	5.51949		11.2753	5.62671		11.2753	13.9406			10.4444	0.291117		10.4458	0.266753		10.4408	1.20615
11.2825	5.49414		11.2825	5.59747		11.2825	13.8214			10.451	0.289626		10.4525	0.264823		10.4475	1.19509
11.2897	5.46972		11.2897	5.56824		11.2897	13.703			10.4577	0.288449		10.4592	0.263952		10.4542	1.18413
11.2969	5.44598		11.2969	5.53938		11.2969	13.5865			10.4644	0.286788		10.4658	0.263691		10.4608	1.17324
11.3041	5.42281		11.3041	5.5112		11.3041	13.4729			10.471	0.284828		10.4725	0.263542		10.4675	1.16272
11.3113	5.40008		11.3113	5.48389		11.3113	13.3628			10.4777	0.282884		10.4792	0.263289		10.4742	1.15217
11.3185	5.37763		11.3185	5.4575		11.3185	13.2558			10.4844	0.280961		10.4858	0.262275		10.4808	1.14135
11.3257	5.35533		11.3257	5.43209		11.3257	13.1514			10.491	0.278927		10.4925	0.260182		10.4875	1.13031
11.3329	5.33313		11.3329	5.40767		11.3329	13.0488			10.4977	0.276677		10.4992	0.256903		10.4942	1.11879
11.3401	5.31099		11.3401	5.38415		11.3401	12.9478			10.5044	0.274606		10.5058	0.253052		10.5008	1.10704
11.3473	5.28881		11.3473	5.36132		11.3473	12.848			10.511	0.27255		10.5125	0.249043		10.5075	1.09515
11.3545	5.26642		11.3545	5.3389		11.3545	12.7496			10.5177	0.270419		10.5192	0.245236		10.5142	1.08336
11.3617	5.24364		11.3617	5.31669		11.3617	12.6524			10.5244	0.268191		10.5258	0.242002		10.5208	1.07152
11.3689	5.2205		11.3689	5.29459		11.3689	12.5565			10.531	0.266142		10.5325	0.23941		10.5275	1.05974
11.3761	5.19725		11.3761	5.27254		11.3761	12.4622			10.5377	0.264391		10.5392	0.237271		10.5342	1.04778
11.3833	5.17429		11.3833	5.25045		11.3833	12.3698			10.5444	0.262856		10.5458	0.235431		10.5408	1.03607
11.3905	5.15199		11.3905	5.22818		11.3905	12.2792			10.551	0.261381		10.5525	0.233598		10.5475	1.02488
11.3977	5.13064		11.3977	5.2056		11.3977	12.1902			10.5577	0.259891		10.5592	0.231728		10.5542	1.01428
11.4049	5.11031		11.4049	5.18266		11.4049	12.1024			10.5644	0.258304		10.5658	0.230014		10.5608	1.00403
11.4121	5.09086		11.4121	5.1595		11.4121	12.0159			10.571	0.256769		10.5725	0.228509		10.5675	0.993744
11.4193	5.07205		11.4193	5.13632		11.4193	11.931			10.5777	0.255242		10.5792	0.226863		10.5742	0.983849
11.4265	5.05362		11.4265	5.11339		11.4265	11.8481			10.5844	0.253811		10.5858	0.224449		10.5808	0.97391
11.4337	5.03532		11.4337	5.09101		11.4337	11.7674			10.591	0.252023		10.5925	0.221327		10.5875	0.963613
11.4409	5.01697		11.4409	5.06945		11.4409	11.689			10.5977	0.249669		10.5992	0.217944		10.5942	0.953272
11.4481	4.99848		11.4481	5.04891		11.4481	11.6126			10.6044	0.246376		10.6058	0.214614		10.6008	0.943258
11.4553	4.97987		11.4553	5.02948		11.4553	11.5379			10.611	0.242785		10.6125	0.211038		10.6075	0.933647
11.4625	4.96122		11.4625	5.01106		11.4625	11.4645			10.6177	0.239357		10.6192	0.207447		10.6142	0.924274
11.4697	4.94271		11.4697	4.99346		11.4697	11.392			10.6244	0.235893		10.6258	0.204235		10.6208	0.915363
11.4769	4.92459		11.4769	4.97649		11.4769	11.3198			10.631	0.232413		10.6325	0.201903		10.6275	0.906594
11.4841	4.90707		11.4841	4.96001		11.4841	11.2478			10.6377	0.229858		10.6392	0.20013		10.6342	0.89711
11.4913	4.89025		11.4913	4.94392		11.4913	11.1761			10.6444	0.228591		10.6458	0.198305		10.6408	0.886947
11.4985	4.87418		11.4985	4.92821		11.4985	11.1053			10.651	0.227332		10.6525	0.196382		10.6475	0.877038
11.5057	4.85891		11.5057	4.91286		11.5057	11.0357			10.6577	0.225075		10.6592	0.194542		10.6542	0.867784
11.5129	4.84448		11.5129	4.89786		11.5129	10.9677			10.6644	0.222065		10.6658	0.192977		10.6608	0.858612
11.5201	4.83091		11.5201	4.88317		11.5201	10.9015			10.671	0.219263		10.6725	0.191286		10.6675	0.849366
11.5273	4.81806		11.5273	4.86861		11.5273	10.8371			10.6777	0.216186		10.6792	0.189379		10.6742	0.84009
11.5345	4.80558		11.5345	4.85392		11.5345	10.7743			10.6844	0.212632		10.6858	0.187591		10.6808	0.830412
11.5417	4.79305		11.5417	4.83883		11.5417	10.713			10.691	0.209019		10.6925	0.186056		10.6875	0.820249
11.5489	4.78005		11.5489	4.8232		11.5489	10.6529			10.6977	0.206202		10.6992	0.184506		10.6942	0.809968
11.5561	4.76631		11.5561	4.807		11.5561	10.5936			10.7044	0.204258		10.7058	0.182733		10.7008	0.800267
11.5633	4.75167		11.5633	4.79034		11.5633	10.5346			10.711	0.202246		10.7125	0.180773		10.7075	0.791021
11.5705	4.73611		11.5705	4.77337		11.5705	10.4759			10.7177	0.199981		10.7192	0.17859		10.7142	0.782326
11.5777	4.71979		11.5777	4.75628		11.5777	10.4173			10.7244	0.197768		10.7258	0.176348		10.7208	0.774391
11.5849	4.70307		11.5849	4.73926		11.5849	10.3588			10.731	0.196263		10.7325	0.174172		10.7275	0.767104
11.5921	4.68644		11.5921	4.72241		11.5921	10.2999			10.7377	0.194997		10.7392	0.172183		10.7342	0.7599
11.5993	4.67042		11.5993	4.70576		11.5993	10.2406			10.7444	0.193432		10.7458	0.169881		10.7408	0.752039
11.6065	4.65536		11.6065	4.68932		11.6065	10.1809			10.751	0.191852		10.7525	0.167474		10.7475	0.743605
11.6137	4.64145		11.6137	4.67305		11.6137	10.1208			10.7577	0.190422		10.7592	0.165001		10.7542	0.735112
11.6209	4.6286		11.6209	4.65685		11.6209	10.0608			10.7644	0.188991		10.7658	0.162326		10.7608	0.726998
11.6281	4.61655		11.6281	4.64069		11.6281	10.0009			10.771	0.186682		10.7725	0.159346		10.7675	0.718988
11.6353	4.60489		11.6353	4.62451		11.6353	9.94109			10.7777	0.183888		10.7792	0.156172		10.7742	0.710778
11.6425	4.59318		11.6425	4.60849		11.6425	9.88159			10.7844	0.181235		10.7858	0.153109		10.7808	0.702284
11.6497	4.58103		11.6497	4.59298		11.6497	9.82257			10.791	0.178695		10.7925	0.149667		10.7875	0.694126
11.6569	4.56823		11.6569	4.57836		11.6569	9.7643			10.7977	0.175975		10.7992	0.146084		10.7942	0.686072
11.6641	4.55468		11.6641	4.56497		11.6641	9.70686			10.8044	0.172846		10.8058	0.142865		10.8008	0.677958
11.6713	4.54053		11.6713	4.55307		11.6713	9.65016			10.811	0.169627		10.8125	0.140272		10.8075	0.669688
11.6785	4.52614		11.6785	4.54285		11.6785	9.59412			10.8177	0.166513		10.8192	0.138044		10.8142	0.661455
11.6857	4.51207		11.6857	4.53436		11.6857	9.53881			10.8244	0.163838		10.8258	0.136495		10.8208	0.653766
11.6929	4.49891		11.6929	4.52746		11.6929	9.48449			10.831	0.161789		10.8325	0.135854		10.8275	0.646301
11.7001	4.48714		11.7001	4.52167		11.7001	9.43142			10.8377	0.160031		10.8392	0.135712		10.8342	0.639163
11.7073	4.47702		11.7073	4.5163		11.7073	9.37974			10.8444	0.158429		10.8458	0.13525		10.8408	0.632249
11.7145	4.46854		11.7145	4.51072		11.7145	9.32944			10.851	0.157379		10.8525	0.13417		10.8475	0.625916
11.7217	4.46144		11.7217	4.50444		11.7217	9.28038			10.8577	0.156969		10.8592	0.132851		10.8542	0.619948
11.7289	4.45535		11.7289	4.49716		11.7289	9.23248			10.8644	0.156403		10.8658	0.130966		10.8608	0.613905
11.7361	4.44973		11.7361	4.48873		11.7361	9.18565			10.871	0.155069		10.8725	0.128426		10.8675	0.607722
11.7433	4.44396		11.7433	4.47921		11.7433	9.13969			10.8777	0.153303		10.8792	0.125259		10.8742	0.601381
11.7505	4.43749		11.7505	4.46884		11.7505	9.09423			10.8844	0.151649		10.8858	0.121996		10.8808	0.594892
11.7577	4.42991		11.7577	4.45802		11.7577	9.04873			10.891	0.150107		10.8925	0.11912		10.8875	0.587851
11.7649	4.42113		11.7649	4.4471		11.7649	9.00271			10.8977	0.148155		10.8992	0.116803		10.8942	0.580817
11.7721	4.41126		11.7721	4.43619		11.7721	8.95595			10.9044	0.145838		10.9058	0.115313		10.9008	0.574306
11.7793	4.40055		11.7793	4.42525		11.7793	8.90853			10.911	0.143543		10.9125	0.114486		10.9075	0.568397
11.7865	4.38924		11.7865	4.41411		11.7865	8.86071			10.9177	0.141367		10.9192	0.114173		10.9142	0.562541
11.7937	4.37754		11.7937	4.40267		11.7937	8.81283			10.9244	0.139162		10.9258	0.113837		10.9208	0.556819
11.8009	4.36565		11.8009	4.39082		11.8009	8.76532			10.931	0.136904		10.9325	0.113383		10.9275	0.551373
11.8081	4.35385		11.8081	4.37858		11.8081	8.71873			10.9377	0.135019		10.9392	0.112593		10.9342	0.546165
11.8153	4.34241		11.8153	4.36602		11.8153	8.67366			10.9444	0.133649		10.9458	0.11161		10.9408	0.540592
11.8225	4.33158		11.8225	4.35344		11.8225	8.63053			10.951	0.132672		10.9525	0.110351		10.9475	0.534371
11.8297	4.32149		11.8297	4.34118		11.8297	8.58955			10.9577	0.132106		10.9592	0.108764		10.9542	0.527911
11.8369	4.31221		11.8369	4.32956		11.8369	8.55069			10.9644	0.132181		10.9658	0.107035		10.9608	0.521667
11.8441	4.30378		11.8441	4.31879		11.8441	8.51372			10.971	0.132471		10.9725	0.105165		10.9675	0.515938
11.8513	4.29627		11.8513	4.30891		11.8513	8.47834			10.9777	0.13236		10.9792	0.10322		10.9742	0.510409
11.8585	4.2896		11.8585	4.29987		11.8585	8.44416			10.9844	0.131793		10.9858	0.101134		10.9808	0.505246
11.8657	4.28355		11.8657	4.29155		11.8657	8.41084			10.991	0.130877		10.9925	0.0991449		10.9875	0.500359
11.8729	4.27771		11.8729	4.28383		11.8729	8.37818			10.9977	0.129521		10.9992	0.0971556		10.9942	0.495553
11.8801	4.27165		11.8801	4.27658		11.8801	8.34608			11.0044	0.127628		11.0058	0.0949726		11.0008	0.490502
11.8873	4.26505		11.8873	4.26971		11.8873	8.3144			11.011	0.125773		11.0125	0.0927001		11.0075	0.485219
11.8945	4.2578		11.8945	4.26316		11.8945	8.283			11.0177	0.124812		11.0192	0.0908747		11.0142	0.480108
11.9017	4.24995		11.9017	4.2569		11.9017	8.25174			11.0244	0.124097		11.0258	0.0894591		11.0208	0.475116
11.9089	4.24163		11.9089	4.2509		11.9089	8.22061			11.031	0.123218		11.0325	0.0883043		11.0275	0.470273
11.9161	4.23302		11.9161	4.24509		11.9161	8.18974			11.0377	0.122137		11.0392	0.0877082		11.0342	0.46549
11.9233	4.22435		11.9233	4.23933		11.9233	8.15921			11.0444	0.120901		11.0458	0.0878125		11.0408	0.460565
11.9305	4.21596		11.9305	4.23344		11.9305	8.12899			11.051	0.119366		11.0525	0.0880212		11.0475	0.455536
11.9377	4.20817		11.9377	4.22728		11.9377	8.09902			11.0577	0.117421		11.0592	0.0872687		11.0542	0.450328
11.9449	4.20119		11.9449	4.22077		11.9449	8.06921			11.0644	0.116266		11.0658	0.0855774		11.0608	0.445381
11.9521	4.19503		11.9521	4.21388		11.9521	8.03954			11.071	0.115991		11.0725	0.0836328		11.0675	0.440888
11.9593	4.18951		11.9593	4.20668		11.9593	8.01003			11.0777	0.11608		11.0792	0.0816882		11.0742	0.437073
11.9665	4.1844		11.9665	4.19926		11.9665	7.98058			11.0844	0.115804		11.0858	0.0799075		11.0808	0.433534
11.9737	4.17947		11.9737	4.19178		11.9737	7.95105			11.091	0.115268		11.0925	0.0786334		11.0875	0.429824
11.9809	4.17441		11.9809	4.18441		11.9809	7.92136			11.0977	0.114486		11.0992	0.0780821		11.0942	0.425555
11.9881	4.16881		11.9881	4.17728		11.9881	7.89166			11.1044	0.113033		11.1058	0.0780225		11.1008	0.420772
11.9953	4.16224		11.9953	4.17045		11.9953	7.86217			11.111	0.110865		11.1125	0.0775456		11.1075	0.415705
12.0025	4.1544		12.0025	4.16396		12.0025	7.83308			11.1177	0.108771		11.1192	0.0765175		11.1142	0.41043
12.0097	4.14526		12.0097	4.15778		12.0097	7.80444			11.1244	0.107206		11.1258	0.0749305		11.1208	0.405356
12.0169	4.135		12.0169	4.1519		12.0169	7.77615			11.131	0.105835		11.1325	0.072822		11.1275	0.400789
12.0241	4.12395		12.0241	4.14634		12.0241	7.74804			11.1377	0.104025		11.1392	0.0706166		11.1342	0.397228
12.0313	4.11255		12.0313	4.14104		12.0313	7.71995			11.1444	0.102326		11.1458	0.0685602		11.1408	0.394136
12.0385	4.10136		12.0385	4.13585		12.0385	7.69177			11.151	0.101484		11.1525	0.067167		11.1475	0.390582
12.0457	4.09101		12.0457	4.1306		12.0457	7.66345			11.1577	0.100814		11.1592	0.0663102		11.1542	0.386514
12.0529	4.08202		12.0529	4.12511		12.0529	7.63494			11.1644	0.0997931		11.1658	0.0660792		11.1608	0.382662
12.0601	4.07469		12.0601	4.11931		12.0601	7.60626			11.171	0.0987723		11.1725	0.0662059		11.1675	0.379391
12.0673	4.06901		12.0673	4.11312		12.0673	7.57756			11.1777	0.0985488		11.1792	0.0664219		11.1742	0.376143
12.0745	4.06479		12.0745	4.10652		12.0745	7.54909			11.1844	0.0985414		11.1858	0.0662729		11.1808	0.372522
12.0817	4.0617		12.0817	4.09958		12.0817	7.52118			11.191	0.0980198		11.1925	0.0657886		11.1875	0.369102
12.0889	4.05937		12.0889	4.0925		12.0889	7.49399			11.1977	0.0974238		11.1992	0.0653341		11.1942	0.366367
12.0961	4.05738		12.0961	4.08563		12.0961	7.46756			11.2044	0.0974685		11.2058	0.0649095		11.2008	0.363611
12.1033	4.05536		12.1033	4.07933		12.1033	7.44179			11.211	0.0976995		11.2125	0.0643209		11.2075	0.360444
12.1105	4.05303		12.1105	4.07381		12.1105	7.41662			11.2177	0.0972599		11.2192	0.0632405		11.2142	0.356741
12.1177	4.05033		12.1177	4.06907		12.1177	7.39198			11.2244	0.0959858		11.2258	0.0618994		11.2208	0.353135
12.1249	4.04724		12.1249	4.06498		12.1249	7.36778			11.231	0.094384		11.2325	0.0605062		11.2275	0.349894
12.1321	4.04386		12.1321	4.06134		12.1321	7.34373			11.2377	0.0926554		11.2392	0.0588372		11.2342	0.346661
12.1393	4.04022		12.1393	4.05788		12.1393	7.31945			11.2444	0.0907928		11.2458	0.0569075		11.2408	0.343479
12.1465	4.03635		12.1465	4.05433		12.1465	7.29467			11.251	0.0888854		11.2525	0.0551715		11.2475	0.33997
12.1537	4.03224		12.1537	4.05037		12.1537	7.26933			11.2577	0.0873059		11.2592	0.0543296		11.2542	0.336573
12.1609	4.02792		12.1609	4.0458		12.1609	7.24361			11.2644	0.0863671		11.2658	0.0542849		11.2608	0.333689
12.1681	4.02334		12.1681	4.04056		12.1681	7.21765			11.271	0.0863224		11.2725	0.0547022		11.2675	0.33123
12.1753	4.01856		12.1753	4.03472		12.1753	7.19146			11.2777	0.0866428		11.2792	0.055328		11.2742	0.32872
12.1825	4.01364		12.1825	4.02845		12.1825	7.16516			11.2844	0.0868216		11.2858	0.0560954		11.2808	0.326075
12.1897	4.00869		12.1897	4.02189		12.1897	7.13908			11.291	0.0865832		11.2925	0.0567585		11.2875	0.323899
12.1969	4.00384		12.1969	4.01515		12.1969	7.1137			11.2977	0.0862554		11.2992	0.0566393		11.2942	0.321835
12.2041	3.9992		12.2041	4.0083		12.2041	7.08936			11.3044	0.0858307		11.3058	0.0557527		11.3008	0.319123
12.2113	3.99492		12.2113	4.00141		12.2113	7.06611			11.311	0.0848398		11.3125	0.0542775		11.3075	0.315748
12.2185	3.99104		12.2185	3.99461		12.2185	7.04378			11.3177	0.0838414		11.3192	0.0527576		11.3142	0.312492
12.2257	3.98752		12.2257	3.98809		12.2257	7.02227			11.3244	0.0830442		11.3258	0.0514835		11.3208	0.309475
12.2329	3.98415		12.2329	3.98206		12.2329	7.00162			11.331	0.0826418		11.3325	0.0507608		11.3275	0.306152
12.2401	3.98065		12.2401	3.9766		12.2401	6.98193			11.3377	0.0820458		11.3392	0.0506788		11.3342	0.302829
12.2473	3.97679		12.2473	3.97179		12.2473	6.96315			11.3444	0.0815615		11.3458	0.050962		11.3408	0.299968
12.2545	3.97242		12.2545	3.96765		12.2545	6.94512			11.351	0.0813529		11.3525	0.0513121		11.3475	0.297517
12.2617	3.9674		12.2617	3.96427		12.2617	6.92764			11.3577	0.0809729		11.3592	0.0515059		11.3542	0.295058
12.2689	3.96167		12.2689	3.96165		12.2689	6.91068			11.3644	0.0801906		11.3658	0.0510886		11.3608	0.292607
12.2761	3.95536		12.2761	3.9596		12.2761	6.89424			11.371	0.0792816		11.3725	0.0497773		11.3675	0.290595
12.2833	3.94879		12.2833	3.95778		12.2833	6.87817			11.3777	0.0790432		11.3792	0.0479296		11.3742	0.288948
12.2905	3.94232		12.2905	3.95576		12.2905	6.86217			11.3844	0.0789389		11.3858	0.0461042		11.3808	0.28725
12.2977	3.93623		12.2977	3.95322		12.2977	6.8458			11.391	0.0787526		11.3925	0.0447556		11.3875	0.285044
12.3049	3.93062		12.3049	3.9499		12.3049	6.82871			11.3977	0.078544		11.3992	0.0432804		11.3942	0.282452
12.3121	3.92552		12.3121	3.94561		12.3121	6.81074			11.4044	0.0788346		11.4058	0.0419021		11.4008	0.279605
12.3193	3.92099		12.3193	3.94023		12.3193	6.79185			11.411	0.0794306		11.4125	0.040926		11.4075	0.276506
12.3265	3.91697		12.3265	3.93382		12.3265	6.77213			11.4177	0.0795051		11.4192	0.0405088		11.4142	0.273325
12.3337	3.91323		12.3337	3.92668		12.3337	6.75165			11.4244	0.0793561		11.4258	0.0404716		11.4208	0.270694
12.3409	3.90942		12.3409	3.91929		12.3409	6.73059			11.431	0.0790879		11.4325	0.0401512		11.4275	0.269048
12.3481	3.9053		12.3481	3.91216		12.3481	6.70918			11.4377	0.0788495		11.4392	0.0400394		11.4342	0.268146
12.3553	3.90089		12.3553	3.90571		12.3553	6.68778			11.4444	0.0782982		11.4458	0.0399947		11.4408	0.267409
12.3625	3.89639		12.3625	3.90024		12.3625	6.66669			11.451	0.0772029		11.4525	0.0401661		11.4475	0.266396
12.3697	3.89205		12.3697	3.89591		12.3697	6.64612			11.4577	0.0760853		11.4592	0.0403523		11.4542	0.264838
12.3769	3.88801		12.3769	3.89274		12.3769	6.62616			11.4644	0.0750422		11.4658	0.040248		11.4608	0.262469
12.3841	3.88436		12.3841	3.89059		12.3841	6.60689			11.471	0.0745058		11.4725	0.0401139		11.4675	0.259668
12.3913	3.88119		12.3913	3.88919		12.3913	6.58837			11.4777	0.0738949		11.4792	0.0399873		11.4742	0.256836
12.3985	3.87849		12.3985	3.88821		12.3985	6.57061			11.4844	0.0732765		11.4858	0.039883		11.4808	0.254408
12.4057	3.87614		12.4057	3.88737		12.4057	6.55361			11.491	0.0728071		11.4925	0.0393391		11.4875	0.252157
12.4129	3.87392		12.4129	3.88643		12.4129	6.53729			11.4977	0.0724047		11.4992	0.0385195		11.4942	0.250019
12.4201	3.87151		12.4201	3.88526		12.4201	6.52161			11.5044	0.071615		11.5058	0.0380427		11.5008	0.248171
12.4273	3.86872		12.4273	3.88381		12.4273	6.50644			11.511	0.069961		11.5125	0.0381395		11.5075	0.246376
12.4345	3.86547		12.4345	3.88204		12.4345	6.49157			11.5177	0.0681579		11.5192	0.038065		11.5142	0.244595
12.4417	3.86177		12.4417	3.8799		12.4417	6.47677			11.5244	0.0667125		11.5258	0.0374839		11.5208	0.242583
12.4489	3.85771		12.4489	3.87722		12.4489	6.4618			11.531	0.0659749		11.5325	0.0366196		11.5275	0.240535
12.4561	3.85346		12.4561	3.87389		12.4561	6.44654			11.5377	0.0656098		11.5392	0.0355989		11.5342	0.23856
12.4633	3.84915		12.4633	3.86992		12.4633	6.43102			11.5444	0.0657216		11.5458	0.0344589		11.5408	0.23663
12.4705	3.84483		12.4705	3.86543		12.4705	6.4153			11.551	0.0663996		11.5525	0.0331849		11.5475	0.234768
12.4777	3.84048		12.4777	3.86064		12.4777	6.39951			11.5577	0.0675768		11.5592	0.0325739		11.5542	0.232607
12.4849	3.83598		12.4849	3.85575		12.4849	6.38377			11.5644	0.0686496		11.5658	0.0326186		11.5608	0.230476
12.4921	3.83124		12.4921	3.85098		12.4921	6.36821			11.571	0.0692904		11.5725	0.0324845		11.5675	0.228815
12.4993	3.8263		12.4993	3.84663		12.4993	6.35299			11.5777	0.0696108		11.5792	0.0318512		11.5742	0.227988
12.5065	3.82127		12.5065	3.84303		12.5065	6.33816			11.5844	0.0694394		11.5858	0.0308901		11.5808	0.227407
12.5137	3.81629		12.5137	3.84032		12.5137	6.32367			11.591	0.0689328		11.5925	0.0300631		11.5875	0.226706
12.5209	3.81147		12.5209	3.8384		12.5209	6.30949			11.5977	0.0682771		11.5992	0.0291467		11.5942	0.225842
12.5281	3.8069		12.5281	3.837		12.5281	6.29559			11.6044	0.067763		11.6058	0.027962		11.6008	0.224575
12.5353	3.80269		12.5353	3.83587		12.5353	6.28206			11.611	0.0671223		11.6125	0.0274256		11.6075	0.222877
12.5425	3.79896		12.5425	3.8349		12.5425	6.26896			11.6177	0.0663623		11.6192	0.0278875		11.6142	0.220679
12.5497	3.79565		12.5497	3.83409		12.5497	6.25629			11.6244	0.0656694		11.6258	0.0288635		11.6208	0.218481
12.5569	3.79254		12.5569	3.83352		12.5569	6.2439			11.631	0.0651181		11.6325	0.0296161		11.6275	0.216544
12.5641	3.78929		12.5641	3.83328		12.5641	6.2316			11.6377	0.0644922		11.6392	0.0300556		11.6342	0.214949
12.5713	3.78565		12.5713	3.83348		12.5713	6.21907			11.6444	0.0640005		11.6458	0.0305325		11.6408	0.213936
12.5785	3.78158		12.5785	3.83415		12.5785	6.20596			11.651	0.0639185		11.6525	0.0307858		11.6475	0.213221
12.5857	3.77725		12.5857	3.83512		12.5857	6.19193			11.6577	0.0639558		11.6592	0.0303537		11.6542	0.212662
12.5929	3.77296		12.5929	3.83602		12.5929	6.1767			11.6644	0.0639036		11.6658	0.0297055		11.6608	0.212036
12.6001	3.76902		12.6001	3.83621		12.6001	6.16031			11.671	0.0637472		11.6725	0.0292212		11.6675	0.211231
12.6073	3.76576		12.6073	3.83511		12.6073	6.14312			11.6777	0.0639334		11.6792	0.0289232		11.6742	0.20998
12.6145	3.76343		12.6145	3.83219		12.6145	6.12565			11.6844	0.0639632		11.6858	0.028789		11.6808	0.208154
12.6217	3.76219		12.6217	3.82724		12.6217	6.10848			11.691	0.0636503		11.6925	0.0287965		11.6875	0.206552
12.6289	3.76193		12.6289	3.82041		12.6289	6.09207			11.6977	0.0629127		11.6992	0.0292435		11.6942	0.205234
12.6361	3.76232		12.6361	3.81224		12.6361	6.07669			11.7044	0.0624284		11.7058	0.0296757		11.7008	0.204094
12.6433	3.76282		12.6433	3.80347		12.6433	6.06255			11.711	0.0624731		11.7125	0.029698		11.7075	0.202902
12.6505	3.76289		12.6505	3.79497		12.6505	6.04963			11.7177	0.0628158		11.7192	0.0295863		11.7142	0.201978
12.6577	3.76205		12.6577	3.78751		12.6577	6.03776			11.7244	0.0633448		11.7258	0.0294074		11.7208	0.2013
12.6649	3.76002		12.6649	3.7816		12.6649	6.02654			11.731	0.0636429		11.7325	0.0292882		11.7275	0.200145
12.6721	3.75667		12.6721	3.77742		12.6721	6.01549			11.7377	0.0638366		11.7392	0.0287518		11.7342	0.198491
12.6793	3.75217		12.6793	3.77477		12.6793	6.00416			11.7444	0.0640079		11.7458	0.0278056		11.7408	0.196651
12.6865	3.74683		12.6865	3.7732		12.6865	5.99226			11.751	0.0639036		11.7525	0.0273287		11.7475	0.195138
12.6937	3.74107		12.6937	3.7721		12.6937	5.97966			11.7577	0.0632256		11.7592	0.0271648		11.7542	0.194006
12.7009	3.73523		12.7009	3.77095		12.7009	5.96636			11.7644	0.0619814		11.7658	0.0268668		11.7608	0.193141
12.7081	3.72963		12.7081	3.7694		12.7081	5.95243			11.771	0.0609457		11.7725	0.0260472		11.7675	0.192299
12.7153	3.72452		12.7153	3.76734		12.7153	5.93788			11.7777	0.0608116		11.7792	0.0257865		11.7742	0.191621
12.7225	3.72013		12.7225	3.76478		12.7225	5.92278			11.7844	0.0608936		11.7858	0.0263751		11.7808	0.191152
12.7297	3.71667		12.7297	3.7618		12.7297	5.90725			11.791	0.060685		11.7925	0.0269264		11.7875	0.190631
12.7369	3.71419		12.7369	3.75855		12.7369	5.8915			11.7977	0.0601411		11.7992	0.0269488		11.7942	0.189498
12.7441	3.71256		12.7441	3.75518		12.7441	5.87569			11.8044	0.059925		11.8058	0.0271946		11.8008	0.187844
12.7513	3.71165		12.7513	3.75176		12.7513	5.85995			11.811	0.060223		11.8125	0.0280067		11.8075	0.186242
12.7585	3.71128		12.7585	3.74825		12.7585	5.84428			11.8177	0.0608116		11.8192	0.0285432		11.8142	0.184916
12.7657	3.71125		12.7657	3.74449		12.7657	5.82879			11.8244	0.0615045		11.8258	0.0284016		11.8208	0.183709
12.7729	3.71131		12.7729	3.74035		12.7729	5.81372			11.831	0.0622943		11.8325	0.027895		11.8275	0.182271
12.7801	3.71106		12.7801	3.73587		12.7801	5.79947			11.8377	0.0629202		11.8392	0.0274554		11.8342	0.181191
12.7873	3.71017		12.7873	3.73128		12.7873	5.7864			11.8444	0.0629276		11.8458	0.0270307		11.8408	0.180475
12.7945	3.70839		12.7945	3.72686		12.7945	5.77475			11.851	0.0623837		11.8525	0.0267923		11.8475	0.179671
12.8017	3.70575		12.8017	3.72286		12.8017	5.76458			11.8577	0.0615045		11.8592	0.0267625		11.8542	0.178456
12.8089	3.70242		12.8089	3.71942		12.8089	5.75575			11.8644	0.0606552		11.8658	0.0269786		11.8608	0.177138
12.8161	3.69865		12.8161	3.71658		12.8161	5.74802			11.871	0.0601262		11.8725	0.0276044		11.8675	0.176735
12.8233	3.69465		12.8233	3.71432		12.8233	5.74095			11.8777	0.0599474		11.8792	0.0288114		11.8742	0.176832
12.8305	3.69065		12.8305	3.71251		12.8305	5.73398			11.8844	0.0600889		11.8858	0.0302643		11.8808	0.176951
12.8377	3.68688		12.8377	3.71084		12.8377	5.7265			11.891	0.0604689		11.8925	0.0313744		11.8875	0.176966
12.8449	3.6835		12.8449	3.70901		12.8449	5.71801			11.8977	0.0608936		11.8992	0.0318661		11.8942	0.177212
12.8521	3.68059		12.8521	3.70681		12.8521	5.7083			11.9044	0.0613555		11.9058	0.0316426		11.9008	0.177562
12.8593	3.67808		12.8593	3.70421		12.8593	5.69749			11.911	0.0614002		11.9125	0.030905		11.9075	0.177383
12.8665	3.67582		12.8665	3.70138		12.8665	5.6859			11.9177	0.0610873		11.9192	0.0298992		11.9142	0.176445
12.8737	3.67367		12.8737	3.69853		12.8737	5.67396			11.9244	0.0606552		11.9258	0.0289455		11.9208	0.175156
12.8809	3.67158		12.8809	3.69594		12.8809	5.66213			11.931	0.0599325		11.9325	0.0281706		11.9275	0.173829
12.8881	3.66955		12.8881	3.6938		12.8881	5.65084			11.9377	0.0587627		11.9392	0.0277832		11.9342	0.172392
12.8953	3.6676		12.8953	3.69228		12.8953	5.64039			11.9444	0.0574738		11.9458	0.0280812		11.9408	0.171021
12.9025	3.66576		12.9025	3.69146		12.9025	5.63084			11.951	0.0568628		11.9525	0.0286102		11.9475	0.169538
12.9097	3.66412		12.9097	3.69134		12.9097	5.62204			11.9577	0.0571311		11.9592	0.0289008		11.9542	0.168256
12.9169	3.66284		12.9169	3.69176		12.9169	5.61368			11.9644	0.0577047		11.9658	0.028789		11.9608	0.167049
12.9241	3.66198		12.9241	3.69248		12.9241	5.60547			11.971	0.0582933		11.9725	0.0287592		11.9675	0.16585
12.9313	3.66156		12.9313	3.69319		12.9313	5.59713			11.9777	0.0588819		11.9792	0.0289008		11.9742	0.164665
12.9385	3.66148		12.9385	3.69368		12.9385	5.5884			11.9844	0.059396		11.9858	0.0287965		11.9808	0.163406
12.9457	3.66164		12.9457	3.69375		12.9457	5.57897			11.991	0.0595227		11.9925	0.0287071		11.9875	0.162557
12.9529	3.66197		12.9529	3.69324		12.9529	5.56853			11.9977	0.0590235		11.9992	0.028789		11.9942	0.162169
12.9601	3.66231		12.9601	3.69195		12.9601	5.5569			12.0044	0.0580996		12.0058	0.02902		12.0008	0.162333
12.9673	3.66244		12.9673	3.68971		12.9673	5.54414			12.011	0.0573695		12.0125	0.0290796		12.0075	0.162959
12.9745	3.66209		12.9745	3.68642		12.9745	5.53052			12.0177	0.057064		12.0192	0.0288785		12.0142	0.16354
12.9817	3.66102		12.9817	3.68215		12.9817	5.51648			12.0244	0.0570342		12.0258	0.0286028		12.0208	0.163652
12.9889	3.65914		12.9889	3.67711		12.9889	5.5024			12.031	0.0572503		12.0325	0.0280738		12.0275	0.16322
12.9961	3.6565		12.9961	3.67155		12.9961	5.48877			12.0377	0.0578314		12.0392	0.0273883		12.0342	0.162929
13.0033	3.65313		13.0033	3.66579		13.0033	5.476			12.0444	0.0588074		12.0458	0.0268593		12.0408	0.162974
13.0105	3.64915		13.0105	3.66018		13.0105	5.46448			12.051	0.0594705		12.0525	0.0267401		12.0475	0.163026
13.0177	3.64473		13.0177	3.65504		13.0177	5.45427			12.0577	0.0597686		12.0592	0.0270009		12.0542	0.162706
13.0249	3.6402		13.0249	3.65067		13.0249	5.44518			12.0644	0.059709		12.0658	0.0276417		12.0608	0.162102
13.0321	3.63594		13.0321	3.64716		13.0321	5.43672			12.071	0.0594482		12.0725	0.0284165		12.0675	0.161417
13.0393	3.63222		13.0393	3.64448		13.0393	5.42835			12.0777	0.0595301		12.0792	0.0291839		12.0742	0.160642
13.0465	3.62912		13.0465	3.64242		13.0465	5.41968			12.0844	0.0600815		12.0858	0.0296757		12.0808	0.159636
13.0537	3.62653		13.0537	3.64071		13.0537	5.41048			12.091	0.0611097		12.0925	0.0296235		12.0875	0.158519
13.0609	3.62425		13.0609	3.63907		13.0609	5.40074			12.0977	0.0617728		12.0992	0.0295267		12.0942	0.15793
13.0681	3.62214		13.0681	3.63734		13.0681	5.39061			12.1044	0.0618547		12.1058	0.0294596		12.1008	0.158101
13.0753	3.62002		13.0753	3.6355		13.0753	5.38037			12.111	0.0617206		12.1125	0.0297725		12.1075	0.158578
13.0825	3.61769		13.0825	3.63363		13.0825	5.37037			12.1177	0.0613332		12.1192	0.0303537		12.1142	0.158511
13.0897	3.61502		13.0897	3.63191		13.0897	5.36098			12.1244	0.0606477		12.1258	0.0311136		12.1208	0.157811
13.0969	3.61202		13.0969	3.63051		13.0969	5.35244			12.131	0.0596344		12.1325	0.0322014		12.1275	0.156872
13.1041	3.60885		13.1041	3.6296		13.1041	5.34479			12.1377	0.0587702		12.1392	0.0330061		12.1342	0.155829
13.1113	3.60574		13.1113	3.62929		13.1113	5.33781			12.1444	0.058651		12.1458	0.0335127		12.1408	0.154525
13.1185	3.60288		13.1185	3.62957		13.1185	5.3311			12.151	0.0589117		12.1525	0.0337288		12.1475	0.152871
13.1257	3.60038		13.1257	3.63032		13.1257	5.32418			12.1577	0.0592321		12.1592	0.0339001		12.1542	0.151418
13.1329	3.59825		13.1329	3.63122		13.1329	5.31666			12.1644	0.0593141		12.1658	0.0341237		12.1608	0.150673
13.1401	3.59639		13.1401	3.63188		13.1401	5.3082			12.171	0.0595227		12.1725	0.0343397		12.1675	0.150934
13.1473	3.59466		13.1473	3.63199		13.1473	5.29865			12.1777	0.0602379		12.1792	0.034295		12.1742	0.151724
13.1545	3.59289		13.1545	3.63135		13.1545	5.28788			12.1844	0.0611097		12.1858	0.0337064		12.1808	0.152744
13.1617	3.59094		13.1617	3.63002		13.1617	5.27593			12.191	0.0616238		12.1925	0.0328422		12.1875	0.153758
13.1689	3.58872		13.1689	3.62811		13.1689	5.26298			12.1977	0.0614375		12.1992	0.0322908		12.1942	0.154443
13.1761	3.58631		13.1761	3.62588		13.1761	5.24938			12.2044	0.0611767		12.2058	0.0321865		12.2008	0.154421
13.1833	3.58388		13.1833	3.62364		13.1833	5.23558			12.211	0.0609607		12.2125	0.0322089		12.2075	0.153385
13.1905	3.58168		13.1905	3.6217		13.1905	5.22206			12.2177	0.0605732		12.2192	0.0324249		12.2142	0.151843
13.1977	3.57998		13.1977	3.62025		13.1977	5.20923			12.2244	0.0598133		12.2258	0.0328794		12.2208	0.150308
13.2049	3.57892		13.2049	3.61939		13.2049	5.19739			12.231	0.0595003		12.2325	0.0334829		12.2275	0.149064
13.2121	3.57853		13.2121	3.61897		13.2121	5.18676			12.2377	0.0601038		12.2392	0.0336319		12.2342	0.148199
13.2193	3.57873		13.2193	3.61876		13.2193	5.17748			12.2444	0.0612512		12.2458	0.03355		12.2408	0.147298
13.2265	3.5793		13.2265	3.61853		13.2265	5.16951			12.251	0.0624508		12.2525	0.0336617		12.2475	0.146598
13.2337	3.57997		13.2337	3.61801		13.2337	5.1626			12.2577	0.0636354		12.2592	0.0344068		12.2542	0.146203
13.2409	3.5804		13.2409	3.61703		13.2409	5.15632			12.2644	0.0648499		12.2658	0.0353381		12.2608	0.146382
13.2481	3.58022		13.2481	3.61546		13.2481	5.15012			12.271	0.0656843		12.2725	0.0359565		12.2675	0.147112
13.2553	3.57918		13.2553	3.61326		13.2553	5.14349			12.2777	0.0656769		12.2792	0.0361651		12.2742	0.148095
13.2625	3.5772		13.2625	3.61046		13.2625	5.13611			12.2844	0.0650436		12.2858	0.0362173		12.2808	0.149317
13.2697	3.57432		13.2697	3.60717		13.2697	5.12776			12.291	0.064306		12.2925	0.0358745		12.2875	0.150271
13.2769	3.57062		13.2769	3.60345		13.2769	5.11836			12.2977	0.0638738		12.2992	0.0348687		12.2942	0.150725
13.2841	3.56616		13.2841	3.59935		13.2841	5.10799			12.3044	0.0635013		12.3058	0.0338405		12.3008	0.150457
13.2913	3.56107		13.2913	3.59489		13.2913	5.09685			12.311	0.0630543		12.3125	0.0331998		12.3075	0.149697
13.2985	3.55555		13.2985	3.59005		13.2985	5.08533			12.3177	0.0628084		12.3192	0.0330061		12.3142	0.148617
13.3057	3.54991		13.3057	3.58492		13.3057	5.07382			12.3244	0.0628456		12.3258	0.0325516		12.3208	0.147432
13.3129	3.54443		13.3129	3.57966		13.3129	5.0627			12.331	0.0629798		12.3325	0.0321567		12.3275	0.146419
13.3201	3.53937		13.3201	3.5745		13.3201	5.0521			12.3377	0.0627041		12.3392	0.0321344		12.3342	0.145942
13.3273	3.53491		13.3273	3.56961		13.3273	5.04196			12.3444	0.0621378		12.3458	0.0324845		12.3408	0.145651
13.3345	3.53125		13.3345	3.56521		13.3345	5.03204			12.351	0.06143		12.3525	0.032939		12.3475	0.145115
13.3417	3.52857		13.3417	3.56138		13.3417	5.0221			12.3577	0.060983		12.3592	0.0333041		12.3542	0.144377
13.3489	3.52695		13.3489	3.55824		13.3489	5.012			12.3644	0.0610724		12.3658	0.0333041		12.3608	0.14393
13.3561	3.52635		13.3561	3.55584		13.3561	5.00169			12.371	0.0611916		12.3725	0.0328571		12.3675	0.143744
13.3633	3.52659		13.3633	3.5542		13.3633	4.99128			12.3777	0.061132		12.3792	0.0323281		12.3742	0.143044
13.3705	3.52747		13.3705	3.55322		13.3705	4.98096			12.3844	0.0613257		12.3858	0.032343		12.3808	0.141911
13.3777	3.52886		13.3777	3.55275		13.3777	4.97117			12.391	0.0620708		12.3925	0.0326261		12.3875	0.140898
13.3849	3.5307		13.3849	3.55264		13.3849	4.96245			12.3977	0.0627562		12.3992	0.0326782		12.3942	0.140436
13.3921	3.53295		13.3921	3.55278		13.3921	4.95535			12.4044	0.0627711		12.4058	0.0325069		12.4008	0.140063
13.3993	3.53556		13.3993	3.55308		13.3993	4.9502			12.411	0.0628084		12.4125	0.0326186		12.4075	0.139453
13.4065	3.53845		13.4065	3.55343		13.4065	4.947			12.4177	0.063248		12.4192	0.032872		12.4142	0.138894
13.4137	3.54151		13.4137	3.55363		13.4137	4.94539			12.4244	0.0634044		12.4258	0.0327602		12.4208	0.138707
13.4209	3.54465		13.4209	3.55346		13.4209	4.94482			12.431	0.0626519		12.4325	0.032112		12.4275	0.138976
13.4281	3.54766		13.4281	3.55273		13.4281	4.94461			12.4377	0.0615865		12.4392	0.0315532		12.4342	0.139073
13.4353	3.55024		13.4353	3.55142		13.4353	4.94404			12.4444	0.0608489		12.4458	0.0313669		12.4408	0.138819
13.4425	3.55196		13.4425	3.54952		13.4425	4.94238			12.451	0.0601485		12.4525	0.0314265		12.4475	0.138439
13.4497	3.55243		13.4497	3.54709		13.4497	4.93905			12.4577	0.059396		12.4592	0.0315532		12.4542	0.138082
13.4569	3.55142		13.4569	3.54422		13.4569	4.93369			12.4644	0.0592992		12.4658	0.0316426		12.4608	0.137664
13.4641	3.5489		13.4641	3.54112		13.4641	4.92629			12.471	0.0604019		12.4725	0.0315383		12.4675	0.136785
13.4713	3.54497		13.4713	3.53799		13.4713	4.91709			12.4777	0.0621751		12.4792	0.0312626		12.4742	0.135936
13.4785	3.53979		13.4785	3.53499		13.4785	4.9065			12.4844	0.0637025		12.4858	0.0309497		12.4808	0.135273
13.4857	3.53361		13.4857	3.53209		13.4857	4.89497			12.491	0.0648871		12.4925	0.0309646		12.4875	0.134587
13.4929	3.5268		13.4929	3.52919		13.4929	4.88296			12.4977	0.0656918		12.4992	0.031054		12.4942	0.133894
13.5001	3.51982		13.5001	3.52614		13.5001	4.87094			12.5044	0.0656396		12.5058	0.0309125		12.5008	0.133291
13.5073	3.51306		13.5073	3.52285		13.5073	4.85933			12.511	0.0646189		12.5125	0.0309199		12.5075	0.132911
13.5145	3.50672		13.5145	3.51927		13.5145	4.8484			12.5177	0.0629276		12.5192	0.030905		12.5142	0.132442
13.5217	3.50083		13.5217	3.51543		13.5217	4.83828			12.5244	0.061281		12.5258	0.0308976		12.5208	0.132076
13.5289	3.49534		13.5289	3.51145		13.5289	4.829			12.531	0.0601783		12.5325	0.0302494		12.5275	0.132322
13.5361	3.4902		13.5361	3.50757		13.5361	4.82056			12.5377	0.0598058		12.5392	0.0291467		12.5342	0.132896
13.5433	3.48544		13.5433	3.50417		13.5433	4.81303			12.5444	0.0601411		12.5458	0.0276342		12.5408	0.133082
13.5505	3.48104		13.5505	3.50165		13.5505	4.80639			12.551	0.0608414		12.5525	0.025861		12.5475	0.132576
13.5577	3.47705		13.5577	3.50029		13.5577	4.80048			12.5577	0.0615269		12.5592	0.0240952		12.5542	0.13157
13.5649	3.47351		13.5649	3.50018		13.5649	4.79503			12.5644	0.062272		12.5658	0.0225753		12.5608	0.130385
13.5721	3.47056		13.5721	3.50114		13.5721	4.78972			12.571	0.0626743		12.5725	0.0211895		12.5675	0.12897
13.5793	3.46838		13.5793	3.50294		13.5793	4.78436			12.5777	0.0628233		12.5792	0.0198632		12.5742	0.127599
13.5865	3.4672		13.5865	3.50525		13.5865	4.77876			12.5844	0.0625923		12.5858	0.0186488		12.5808	0.12707
13.5937	3.46711		13.5937	3.50772		13.5937	4.7727			12.591	0.0618771		12.5925	0.0176877		12.5875	0.127368
13.6009	3.46806		13.6009	3.50991		13.6009	4.7659			12.5977	0.060983		12.5992	0.0169054		12.5942	0.128143
13.6081	3.46985		13.6081	3.51146		13.6081	4.75816			12.6044	0.0599995		12.6058	0.0164434		12.6008	0.128634
13.6153	3.47226		13.6153	3.51202		13.6153	4.74949			12.611	0.0595823		12.6125	0.0164136		12.6075	0.128828
13.6225	3.47503		13.6225	3.51157		13.6225	4.74012			12.6177	0.0593662		12.6192	0.0164732		12.6142	0.129014
13.6297	3.47796		13.6297	3.51024		13.6297	4.7304			12.6244	0.0592247		12.6258	0.0163689		12.6208	0.129186
13.6369	3.48079		13.6369	3.50836		13.6369	4.72057			12.631	0.0593513		12.6325	0.0158623		12.6275	0.129327
13.6441	3.48327		13.6441	3.50625		13.6441	4.71084			12.6377	0.0600293		12.6392	0.0151619		12.6342	0.129275
13.6513	3.4852		13.6513	3.50415		13.6513	4.7014			12.6444	0.0611544		12.6458	0.0141859		12.6408	0.129305
13.6585	3.48654		13.6585	3.50221		13.6585	4.69253			12.651	0.0617877		12.6525	0.0129789		12.6475	0.129409
13.6657	3.48729		13.6657	3.50063		13.6657	4.68447			12.6577	0.0616387		12.6592	0.0117719		12.6542	0.129208
13.6729	3.48758		13.6729	3.49947		13.6729	4.67727			12.6644	0.0612065		12.6658	0.0106543		12.6608	0.128299
13.6801	3.48744		13.6801	3.49863		13.6801	4.67087			12.671	0.0610203		12.6725	0.00986457		12.6675	0.126928
13.6873	3.48687		13.6873	3.49784		13.6873	4.66506			12.6777	0.0610873		12.6792	0.00952929		12.6742	0.12546
13.6945	3.48585		13.6945	3.4968		13.6945	4.65972			12.6844	0.0609979		12.6858	0.00947714		12.6808	0.124246
13.7017	3.48438		13.7017	3.49525		13.7017	4.65475			12.691	0.0609085		12.6925	0.00969321		12.6875	0.123411
13.7089	3.4825		13.7089	3.49318		13.7089	4.65012			12.6977	0.0608936		12.6992	0.00981987		12.6942	0.123024
13.7161	3.48024		13.7161	3.4907		13.7161	4.64576			12.7044	0.0608191		12.7058	0.00981241		12.7008	0.122808
13.7233	3.47766		13.7233	3.48803		13.7233	4.64163			12.711	0.0604764		12.7125	0.00975281		12.7075	0.122614
13.7305	3.47478		13.7305	3.4854		13.7305	4.63772			12.7177	0.0600368		12.7192	0.00964105		12.7142	0.122495
13.7377	3.47172		13.7377	3.48306		13.7377	4.63403			12.7244	0.0596419		12.7258	0.00949949		12.7208	0.122488
13.7449	3.46863		13.7449	3.48123		13.7449	4.63052			12.731	0.0593141		12.7325	0.00885129		12.7275	0.122167
13.7521	3.46571		13.7521	3.47999		13.7521	4.62711			12.7377	0.0593662		12.7392	0.00815094		12.7342	0.121348
13.7593	3.46313		13.7593	3.47924		13.7593	4.62365			12.7444	0.0600368		12.7458	0.00800937		12.7408	0.12064
13.7665	3.46089		13.7665	3.47877		13.7665	4.62003			12.751	0.0609905		12.7525	0.00845641		12.7475	0.120528
13.7737	3.45888		13.7737	3.4783		13.7737	4.61621			12.7577	0.0614896		12.7592	0.00891834		12.7542	0.121027
13.7809	3.45691		13.7809	3.47762		13.7809	4.61214			12.7644	0.0615418		12.7658	0.009045		12.7608	0.121795
13.7881	3.45492		13.7881	3.4766		13.7881	4.60784			12.771	0.0610277		12.7725	0.0090003		12.7675	0.122547
13.7953	3.45287		13.7953	3.47521		13.7953	4.60333			12.7777	0.0599101		12.7792	0.0089556		12.7742	0.123538
13.8025	3.4508		13.8025	3.47354		13.8025	4.59865			12.7844	0.0582188		12.7858	0.00870228		12.7808	0.124544
13.8097	3.44868		13.8097	3.47175		13.8097	4.59387			12.791	0.0566244		12.7925	0.00796467		12.7875	0.125311
13.8169	3.44651		13.8169	3.47002		13.8169	4.58895			12.7977	0.0559464		12.7992	0.00717491		12.7942	0.12596
13.8241	3.44443		13.8241	3.46844		13.8241	4.5838			12.8044	0.0561252		12.8058	0.00674278		12.8008	0.126749
13.8313	3.44268		13.8313	3.46703		13.8313	4.5783			12.811	0.0568181		12.8125	0.00721216		12.8075	0.127904
13.8385	3.44154		13.8385	3.46575		13.8385	4.57239			12.8177	0.0580251		12.8192	0.00801682		12.8142	0.128806
13.8457	3.44118		13.8457	3.46454		13.8457	4.56604			12.8244	0.0596568		12.8258	0.0089556		12.8208	0.129327
13.8529	3.44161		13.8529	3.4633		13.8529	4.5593			12.831	0.0611022		12.8325	0.0103191		12.8275	0.129826
13.8601	3.4427		13.8601	3.46192		13.8601	4.55234			12.8377	0.0617877		12.8392	0.011988		12.8342	0.130333
13.8673	3.44425		13.8673	3.46026		13.8673	4.54544			12.8444	0.0619516		12.8458	0.0136793		12.8408	0.130549
13.8745	3.44597		13.8745	3.45828		13.8745	4.53897			12.851	0.0622943		12.8525	0.0149161		12.8475	0.130586
13.8817	3.44748		13.8817	3.45604		13.8817	4.53316			12.8577	0.0625253		12.8592	0.0158697		12.8542	0.131063
13.8889	3.44838		13.8889	3.45367		13.8889	4.52808			12.8644	0.0620708		12.8658	0.0169128		12.8608	0.132449
13.8961	3.44831		13.8961	3.45128		13.8961	4.52364			12.871	0.0613704		12.8725	0.0177398		12.8675	0.134021
13.9033	3.44715		13.9033	3.44899		13.9033	4.51972			12.8777	0.0606477		12.8792	0.0183657		12.8742	0.13534
13.9105	3.44497		13.9105	3.44695		13.9105	4.51612			12.8844	0.0595674		12.8858	0.0186339		12.8808	0.136383
13.9177	3.44214		13.9177	3.44534		13.9177	4.51262			12.891	0.0580028		12.8925	0.0191182		12.8875	0.137419
13.9249	3.43909		13.9249	3.44433		13.9249	4.50888			12.8977	0.0567734		12.8992	0.0201166		12.8942	0.138104
13.9321	3.43631		13.9321	3.44398		13.9321	4.50464			12.9044	0.0568181		12.9058	0.0215173		12.9008	0.137843
13.9393	3.43423		13.9393	3.44425		13.9393	4.49978			12.911	0.0574589		12.9125	0.0232756		12.9075	0.137188
13.9465	3.43319		13.9465	3.44506		13.9465	4.4944			12.9177	0.0579804		12.9192	0.025019		12.9142	0.136875
13.9537	3.43329		13.9537	3.44629		13.9537	4.48872			12.9244	0.0584424		12.9258	0.0266135		12.9208	0.137314
13.9609	3.43439		13.9609	3.44779		13.9609	4.48293			12.931	0.0588745		12.9325	0.0279397		12.9275	0.137724
13.9681	3.43612		13.9681	3.44936		13.9681	4.47712			12.9377	0.0591576		12.9392	0.0291094		12.9342	0.137784
13.9753	3.43799		13.9753	3.45073		13.9753	4.47145			12.9444	0.0590608		12.9458	0.0302568		12.9408	0.137828
13.9825	3.43958		13.9825	3.45167		13.9825	4.46613			12.951	0.0589937		12.9525	0.031285		12.9475	0.138208
13.9897	3.44059		13.9897	3.45208		13.9897	4.46132			12.9577	0.0589788		12.9592	0.0322834		12.9542	0.138588
13.9969	3.44095		13.9969	3.45194		13.9969	4.45712			12.9644	0.0592247		12.9658	0.033617		12.9608	0.138782
14.0041	3.44062		14.0041	3.45135		14.0041	4.45345			12.971	0.0598431		12.9725	0.0351816		12.9675	0.139184
14.0113	3.43972		14.0113	3.4504		14.0113	4.45026			12.9777	0.0605732		12.9792	0.036791		12.9742	0.140414
14.0185	3.43842		14.0185	3.44924		14.0185	4.44747			12.9844	0.0608042		12.9858	0.0381917		12.9808	0.14215
14.0257	3.43697		14.0257	3.44793		14.0257	4.44506			12.991	0.0603497		12.9925	0.0395477		12.9875	0.144042
14.0329	3.43559		14.0329	3.44651		14.0329	4.44292			12.9977	0.059858		12.9992	0.0412241		12.9942	0.145771
14.0401	3.43438		14.0401	3.44497		14.0401	4.44087			13.0044	0.0592992		13.0058	0.0431538		13.0008	0.147171
14.0473	3.43326		14.0473	3.44326		14.0473	4.4387			13.011	0.058502		13.0125	0.0450835		13.0075	0.148229
14.0545	3.43207		14.0545	3.44139		14.0545	4.43624			13.0177	0.0578314		13.0192	0.0469834		13.0142	0.148848
14.0617	3.43063		14.0617	3.43937		14.0617	4.43332			13.0244	0.05766		13.0258	0.0488386		13.0208	0.149608
14.0689	3.4289		14.0689	3.43718		14.0689	4.42981			13.031	0.0580922		13.0325	0.0509545		13.0275	0.149861
14.0761	3.42684		14.0761	3.4348		14.0761	4.42563			13.0377	0.0587553		13.0392	0.052847		13.0342	0.149779
14.0833	3.42445		14.0833	3.43227		14.0833	4.42083			13.0444	0.0597015		13.0458	0.0545532		13.0408	0.149421
14.0905	3.42173		14.0905	3.42967		14.0905	4.4156			13.051	0.0609308		13.0525	0.0564158		13.0475	0.149317
14.0977	3.41877		14.0977	3.42717		14.0977	4.41017			13.0577	0.0618547		13.0592	0.0590384		13.0542	0.14995
14.1049	3.41576		14.1049	3.42491		14.1049	4.40472			13.0644	0.0621527		13.0658	0.0627637		13.0608	0.151016
14.1121	3.41294		14.1121	3.42293		14.1121	4.39934			13.071	0.0620261		13.0725	0.0667274		13.0675	0.152864
14.1193	3.41047		14.1193	3.42119		14.1193	4.39402			13.0777	0.061892		13.0792	0.070706		13.0742	0.154756
14.1265	3.40843		14.1265	3.41968		14.1265	4.3887			13.0844	0.0618175		13.0858	0.0742301		13.0808	0.156812
14.1337	3.4068		14.1337	3.41846		14.1337	4.38324			13.091	0.0616089		13.0925	0.077568		13.0875	0.158787
14.1409	3.40551		14.1409	3.41763		14.1409	4.37745			13.0977	0.0616163		13.0992	0.0803843		13.0942	0.160307
14.1481	3.40453		14.1481	3.41723		14.1481	4.37119			13.1044	0.0623688		13.1058	0.0826865		13.1008	0.161231
14.1553	3.40382		14.1553	3.41721		14.1553	4.36453			13.111	0.0637844		13.1125	0.0850558		13.1075	0.161834
14.1625	3.40334		14.1625	3.41747		14.1625	4.35777			13.1177	0.0648722		13.1192	0.0878125		13.1142	0.162989
14.1697	3.40292		14.1697	3.41798		14.1697	4.35132			13.1244	0.0650212		13.1258	0.0914112		13.1208	0.164807
14.1769	3.4024		14.1769	3.41873		14.1769	4.3456			13.131	0.0644997		13.1325	0.0954047		13.1275	0.166729
14.1841	3.40164		14.1841	3.41967		14.1841	4.34094			13.1377	0.0639707		13.1392	0.0993907		13.1342	0.168435
14.1913	3.4006		14.1913	3.42064		14.1913	4.33755			13.1444	0.0635386		13.1458	0.102609		13.1408	0.170015
14.1985	3.3993		14.1985	3.4214		14.1985	4.33545			13.151	0.0631586		13.1525	0.105232		13.1475	0.171505
14.2057	3.39777		14.2057	3.42166		14.2057	4.33438			13.1577	0.0632629		13.1592	0.107624		13.1542	0.172757
14.2129	3.39603		14.2129	3.42129		14.2129	4.33382			13.1644	0.0643358		13.1658	0.109881		13.1608	0.173613
14.2201	3.3941		14.2201	3.42027		14.2201	4.33302			13.171	0.0658482		13.1725	0.11199		13.1675	0.174373
14.2273	3.39214		14.2273	3.41877		14.2273	4.3313			13.1777	0.0668988		13.1792	0.114173		13.1742	0.175521
14.2345	3.39036		14.2345	3.41702		14.2345	4.32823			13.1844	0.0673234		13.1858	0.116855		13.1808	0.176974
14.2417	3.38898		14.2417	3.41524		14.2417	4.32369			13.191	0.0671595		13.1925	0.119612		13.1875	0.178553
14.2489	3.38806		14.2489	3.4137		14.2489	4.31778			13.1977	0.0667349		13.1992	0.121944		13.1942	0.180073
14.2561	3.38756		14.2561	3.41259		14.2561	4.31083			13.2044	0.0659898		13.2058	0.123888		13.2008	0.181586
14.2633	3.3874		14.2633	3.41207		14.2633	4.30335			13.211	0.0653937		13.2125	0.125602		13.2075	0.182852
14.2705	3.38748		14.2705	3.41211		14.2705	4.296			13.2177	0.0652447		13.2192	0.127219		13.2142	0.183143
14.2777	3.38764		14.2777	3.41248		14.2777	4.28951			13.2244	0.0651181		13.2258	0.128642		13.2208	0.182591
14.2849	3.38766		14.2849	3.41283		14.2849	4.28438			13.231	0.0648946		13.2325	0.130169		13.2275	0.181586
14.2921	3.38729		14.2921	3.4128		14.2921	4.28074			13.2377	0.0645742		13.2392	0.132091		13.2342	0.180766
14.2993	3.38634		14.2993	3.41218		14.2993	4.27837			13.2444	0.0645965		13.2458	0.134028		13.2408	0.180155
14.3065	3.38477		14.3065	3.41094		14.3065	4.27686			13.251	0.0651926		13.2525	0.13572		13.2475	0.17973
14.3137	3.38265		14.3137	3.40925		14.3137	4.27575			13.2577	0.0659749		13.2592	0.136636		13.2542	0.179671
14.3209	3.38019		14.3209	3.40747		14.3209	4.27458			13.2644	0.0665858		13.2658	0.137143		13.2608	0.179805
14.3281	3.37757		14.3281	3.40597		14.3281	4.27291			13.271	0.0665635		13.2725	0.137731		13.2675	0.180356
14.3353	3.37499		14.3353	3.40514		14.3353	4.27036			13.2777	0.066027		13.2792	0.138372		13.2742	0.180557
14.3425	3.37262		14.3425	3.40518		14.3425	4.26682			13.2844	0.0654534		13.2858	0.138603		13.2808	0.179969
14.3497	3.37065		14.3497	3.4061		14.3497	4.26239			13.291	0.0646934		13.2925	0.137918		13.2875	0.17906
[truncated: 1,756 more rows]

## Sheet: rep 2
2019-10-10
	TMR signals													A280 signals
	IRE1 wt 2076-TMR			IRE1 wt 2076-TMR			IRE1 wt 2076-TMR			IRE1 wt 2076-TMR				IRE1 wt 2076-TMR			IRE1 wt 2076-TMR			IRE1 wt 2076-TMR			IRE1 wt 2076-TMR
	run 13			run 15			run 16			run 18				run 13			run 15			run 16			run 18
	0.5 uM			0.5 uM + 100uM MPZN			2 uM			0.5 uM + 1000uM MPZN				0.5 uM			0.5 uM + 100uM MPZN			2 uM			0.5 uM + 1000uM MPZN
	Time	TMR		Time	TMR		Time	TMR		Time	TMR			Time	A280		Time	A280		Time	A280		Time	A280
	0	3.047		0	3.07112		0	3.03573		0	3.111			0.00125	0.00675023		0.00458333	-0.0957325		0.00458333	0.00522286		0.00125	-0.116967
	0.00720005	3.04695		0.00720005	3.07204		0.00720005	3.0373		0.00720005	3.109			0.00791667	0.00599772		0.01125	-0.096485		0.01125	0.00653416		0.00791667	-0.1176
	0.0144001	3.04725		0.0144001	3.07414		0.0144001	3.03909		0.0144001	3.1072			0.0145833	0.00602007		0.0179167	-0.0973642		0.0179167	0.00747293		0.0145833	-0.118293
	0.0216001	3.04783		0.0216001	3.07723		0.0216001	3.04096		0.0216001	3.10562			0.02125	0.00667572		0.0245833	-0.0982061		0.0245833	0.00799447		0.02125	-0.118867
	0.0288002	3.04856		0.0288002	3.08096		0.0288002	3.04276		0.0288002	3.10421			0.0279167	0.00769645		0.03125	-0.0988767		0.03125	0.00847876		0.0279167	-0.11944
	0.0360002	3.04926		0.0360002	3.0849		0.0360002	3.04428		0.0360002	3.10289			0.0345833	0.0090301		0.0379167	-0.0998378		0.0379167	0.00896305		0.0345833	-0.120468
	0.0432003	3.04979		0.0432003	3.08867		0.0432003	3.04535		0.0432003	3.10163			0.04125	0.0105724		0.0445833	-0.101186		0.0445833	0.00884384		0.04125	-0.122108
	0.0504003	3.05008		0.0504003	3.092		0.0504003	3.04589		0.0504003	3.1005			0.0479167	0.0119582		0.05125	-0.102848		0.05125	0.00841171		0.0479167	-0.124089
	0.0576004	3.05005		0.0576004	3.09467		0.0576004	3.04592		0.0576004	3.09958			0.0545833	0.0126511		0.0579167	-0.104815		0.0579167	0.00812113		0.0545833	-0.126384
	0.0648004	3.04967		0.0648004	3.09644		0.0648004	3.04543		0.0648004	3.099			0.06125	0.0125542		0.0645833	-0.106663		0.0645833	0.00801682		0.06125	-0.129163
	0.0720005	3.04894		0.0720005	3.0971		0.0720005	3.0445		0.0720005	3.09885			0.0679167	0.0119507		0.07125	-0.108175		0.07125	0.00719726		0.0679167	-0.132114
	0.0792005	3.04798		0.0792005	3.09657		0.0792005	3.04322		0.0792005	3.09922			0.0745833	0.011079		0.0779167	-0.109471		0.0779167	0.00533462		0.0745833	-0.13496
	0.0864006	3.04695		0.0864006	3.09499		0.0864006	3.04176		0.0864006	3.10021			0.08125	0.0103712		0.0845833	-0.111058		0.0845833	0.00355393		0.08125	-0.137359
	0.0936006	3.04601		0.0936006	3.09265		0.0936006	3.04028		0.0936006	3.10191			0.0879167	0.00970066		0.09125	-0.112474		0.09125	0.0026077		0.0879167	-0.139415
	0.100801	3.04526		0.100801	3.0898		0.100801	3.03883		0.100801	3.10432			0.0945833	0.00931323		0.0979167	-0.113487		0.0979167	0.00251085		0.0945833	-0.141121
	0.108001	3.04473		0.108001	3.08666		0.108001	3.03749		0.108001	3.10732			0.10125	0.00941008		0.104583	-0.114188		0.104583	0.00266731		0.10125	-0.142172
	0.115201	3.0444		0.115201	3.08342		0.115201	3.03637		0.115201	3.11055			0.107917	0.010103		0.11125	-0.115104		0.11125	0.00305474		0.107917	-0.142679
	0.122401	3.04425		0.122401	3.08035		0.122401	3.03565		0.122401	3.11359			0.114583	0.0106618		0.117917	-0.116147		0.117917	0.00422448		0.114583	-0.142947
	0.129601	3.04428		0.129601	3.07776		0.129601	3.03551		0.129601	3.11602			0.12125	0.0104234		0.124583	-0.116862		0.124583	0.0057593		0.12125	-0.143915
	0.136801	3.04441		0.136801	3.07583		0.136801	3.036		0.136801	3.11751			0.127917	0.00993162		0.13125	-0.117421		0.13125	0.00727177		0.127917	-0.145666
	0.144001	3.04453		0.144001	3.07452		0.144001	3.03713		0.144001	3.11783			0.134583	0.00973046		0.137917	-0.117756		0.137917	0.0083372		0.134583	-0.14738
	0.151201	3.04454		0.151201	3.07365		0.151201	3.03887		0.151201	3.11678			0.14125	0.0096187		0.144583	-0.118442		0.144583	0.00890344		0.14125	-0.149064
	0.158401	3.04437		0.158401	3.07304		0.158401	3.04119		0.158401	3.11431			0.147917	0.00937283		0.15125	-0.119783		0.15125	0.00894815		0.147917	-0.15112
	0.165601	3.04402		0.165601	3.07257		0.165601	3.04397		0.165601	3.11055			0.154583	0.00929087		0.157917	-0.121847		0.157917	0.00821054		0.154583	-0.15343
	0.172801	3.0435		0.172801	3.07218		0.172801	3.04701		0.172801	3.10583			0.16125	0.00994653		0.164583	-0.123993		0.164583	0.00732392		0.16125	-0.155248
	0.180001	3.04291		0.180001	3.07183		0.180001	3.05007		0.180001	3.10073			0.167917	0.0103563		0.17125	-0.125855		0.17125	0.00645965		0.167917	-0.156567
	0.187201	3.0424		0.187201	3.07144		0.187201	3.05297		0.187201	3.0959			0.174583	0.0100434		0.177917	-0.127405		0.177917	0.00566244		0.174583	-0.157632
	0.194401	3.04223		0.194401	3.07103		0.194401	3.05561		0.194401	3.0919			0.18125	0.00938773		0.184583	-0.128515		0.184583	0.00501424		0.18125	-0.158787
	0.201601	3.0427		0.201601	3.07064		0.201601	3.0579		0.201601	3.08907			0.187917	0.00891089		0.19125	-0.129014		0.19125	0.00489503		0.187917	-0.159636
	0.208801	3.04402		0.208801	3.07041		0.208801	3.05979		0.208801	3.08763			0.194583	0.0089854		0.197917	-0.129014		0.197917	0.00528991		0.194583	-0.160612
	0.216001	3.04621		0.216001	3.07037		0.216001	3.06123		0.216001	3.08766			0.20125	0.00905246		0.204583	-0.129096		0.204583	0.00567734		0.20125	-0.161625
	0.223201	3.04913		0.223201	3.07053		0.223201	3.06219		0.223201	3.08913			0.207917	0.00938773		0.21125	-0.129186		0.21125	0.005804		0.207917	-0.162765
	0.230401	3.05259		0.230401	3.07073		0.230401	3.0626		0.230401	3.09179			0.214583	0.00967085		0.217917	-0.129431		0.217917	0.00566244		0.214583	-0.16439
	0.237602	3.05628		0.237602	3.07083		0.237602	3.06235		0.237602	3.09518			0.22125	0.00990182		0.224583	-0.130065		0.224583	0.00541657		0.22125	-0.166491
	0.244802	3.05983		0.244802	3.07069		0.244802	3.06127		0.244802	3.09865			0.227917	0.0101104		0.23125	-0.130981		0.23125	0.00494719		0.227917	-0.169009
	0.252002	3.0628		0.252002	3.07023		0.252002	3.05924		0.252002	3.10161			0.234583	0.0102893		0.237917	-0.132039		0.237917	0.00432879		0.234583	-0.171103
	0.259202	3.06476		0.259202	3.06951		0.259202	3.05622		0.259202	3.10365			0.24125	0.0105351		0.244583	-0.132978		0.244583	0.00353158		0.24125	-0.172906
	0.266402	3.06549		0.266402	3.06866		0.266402	3.05234		0.266402	3.10458			0.247917	0.0109151		0.25125	-0.13417		0.25125	0.00265241		0.247917	-0.174329
	0.273602	3.06504		0.273602	3.06787		0.273602	3.04783		0.273602	3.10438			0.254583	0.0115037		0.257917	-0.135653		0.257917	0.00204146		0.254583	-0.175431
	0.280802	3.0636		0.280802	3.06739		0.280802	3.04307		0.280802	3.10313			0.26125	0.0119805		0.264583	-0.137098		0.264583	0.00160187		0.26125	-0.176437
	0.288002	3.06144		0.288002	3.06737		0.288002	3.03845		0.288002	3.10112			0.267917	0.0118092		0.27125	-0.138611		0.27125	0.00127405		0.267917	-0.17754
	0.295202	3.05886		0.295202	3.06796		0.295202	3.03439		0.295202	3.09877			0.274583	0.0110194		0.277917	-0.139736		0.277917	0.00133365		0.274583	-0.178993
	0.302402	3.0561		0.302402	3.06916		0.302402	3.03115		0.302402	3.09667			0.28125	0.00993162		0.284583	-0.140347		0.284583	0.00198185		0.28125	-0.18058
	0.309602	3.05345		0.309602	3.07084		0.309602	3.02889		0.309602	3.09536			0.287917	0.00876933		0.29125	-0.140607		0.29125	0.00303239		0.287917	-0.182286
	0.316802	3.0511		0.316802	3.07276		0.316802	3.02764		0.316802	3.09524			0.294583	0.00791997		0.297917	-0.141218		0.297917	0.00399351		0.294583	-0.184439
	0.324002	3.04922		0.324002	3.07462		0.324002	3.02731		0.324002	3.09644			0.30125	0.00743568		0.304583	-0.142328		0.304583	0.00470877		0.30125	-0.186622
	0.331202	3.0478		0.331202	3.07612		0.331202	3.02772		0.331202	3.09882			0.307917	0.00756234		0.31125	-0.143558		0.31125	0.00526756		0.307917	-0.188284
	0.338402	3.04682		0.338402	3.07708		0.338402	3.02866		0.338402	3.10205			0.314583	0.00790507		0.317917	-0.144929		0.317917	0.00542402		0.314583	-0.189058
	0.345602	3.04621		0.345602	3.07738		0.345602	3.02995		0.345602	3.10566			0.32125	0.0082925		0.324583	-0.146568		0.324583	0.005126		0.32125	-0.189275
	0.352802	3.04599		0.352802	3.07705		0.352802	3.03149		0.352802	3.10923			0.327917	0.00862777		0.33125	-0.14855		0.33125	0.00447035		0.327917	-0.189677
	0.360002	3.04624		0.360002	3.07626		0.360002	3.03327		0.360002	3.11232			0.334583	0.00865012		0.337917	-0.150502		0.337917	0.00372529		0.334583	-0.190027
	0.367202	3.04698		0.367202	3.07531		0.367202	3.03531		0.367202	3.11455			0.34125	0.00864267		0.344583	-0.152133		0.344583	0.00331551		0.34125	-0.190265
	0.374402	3.04821		0.374402	3.07462		0.374402	3.03764		0.374402	3.11565			0.347917	0.00870973		0.35125	-0.153333		0.35125	0.0032708		0.347917	-0.190601
	0.381602	3.04981		0.381602	3.07452		0.381602	3.04022		0.381602	3.1155			0.354583	0.00930578		0.357917	-0.1541		0.357917	0.00332296		0.354583	-0.191651
	0.388802	3.05161		0.388802	3.07529		0.388802	3.04295		0.388802	3.11419			0.36125	0.0102147		0.364583	-0.154905		0.364583	0.00335276		0.36125	-0.193499
	0.396003	3.05347		0.396003	3.07701		0.396003	3.0457		0.396003	3.11202			0.367917	0.0111386		0.37125	-0.155814		0.37125	0.00340492		0.367917	-0.195511
	0.403203	3.05519		0.403203	3.07958		0.403203	3.04825		0.403203	3.10937			0.374583	0.0118911		0.377917	-0.15647		0.377917	0.00345707		0.374583	-0.197418
	0.410403	3.05654		0.410403	3.08271		0.410403	3.0504		0.410403	3.10657			0.38125	0.012137		0.384583	-0.156984		0.384583	0.0032559		0.38125	-0.198998
	0.417603	3.05728		0.417603	3.08604		0.417603	3.05195		0.417603	3.10386			0.387917	0.0118986		0.39125	-0.157826		0.39125	0.00268966		0.387917	-0.200585
	0.424803	3.05727		0.424803	3.08911		0.424803	3.05273		0.424803	3.10146			0.394583	0.011012		0.397917	-0.159562		0.397917	0.00219792		0.394583	-0.201963
	0.432003	3.05642		0.432003	3.09147		0.432003	3.05263		0.432003	3.09956			0.40125	0.0100285		0.404583	-0.161491		0.404583	0.001885		0.40125	-0.203334
	0.439203	3.05482		0.439203	3.09277		0.439203	3.05165		0.439203	3.09832			0.407917	0.00921637		0.41125	-0.162989		0.41125	0.00160187		0.407917	-0.204809
	0.446403	3.05256		0.446403	3.09286		0.446403	3.04991		0.446403	3.09782			0.414583	0.00891834		0.417917	-0.164062		0.417917	0.00174344		0.414583	-0.206552
	0.453603	3.04982		0.453603	3.09185		0.453603	3.04763		0.453603	3.09805			0.42125	0.00918657		0.424583	-0.164948		0.424583	0.0026226		0.42125	-0.208899
	0.460803	3.04688		0.460803	3.09012		0.460803	3.04509		0.460803	3.09885			0.427917	0.0096634		0.43125	-0.165679		0.43125	0.00406057		0.427917	-0.211254
	0.468003	3.04405		0.468003	3.0881		0.468003	3.04253		0.468003	3.09995			0.434583	0.00996143		0.437917	-0.166088		0.437917	0.00539422		0.434583	-0.213146
	0.475203	3.04162		0.475203	3.08619		0.475203	3.04024		0.475203	3.10104			0.44125	0.00981241		0.444583	-0.166573		0.444583	0.00610948		0.44125	-0.214279
	0.482403	3.03974		0.482403	3.0847		0.482403	3.03846		0.482403	3.10183			0.447917	0.00973046		0.45125	-0.167489		0.45125	0.00648201		0.447917	-0.215046
	0.489603	3.03836		0.489603	3.08386		0.489603	3.03741		0.489603	3.10211			0.454583	0.0100732		0.457917	-0.16845		0.457917	0.00628829		0.454583	-0.215761
	0.496803	3.03735		0.496803	3.08389		0.496803	3.0372		0.496803	3.1018			0.46125	0.0107437		0.464583	-0.169151		0.464583	0.00549853		0.46125	-0.216417
	0.504003	3.03651		0.504003	3.08488		0.504003	3.03775		0.504003	3.10084			0.467917	0.0114143		0.47125	-0.169545		0.47125	0.00467151		0.467917	-0.217304
	0.511203	3.03579		0.511203	3.08669		0.511203	3.03884		0.511203	3.09932			0.474583	0.0119284		0.477917	-0.169955		0.477917	0.00441074		0.474583	-0.218727
	0.518403	3.0351		0.518403	3.089		0.518403	3.04011		0.518403	3.09744			0.48125	0.0121891		0.484583	-0.170238		0.484583	0.00473857		0.48125	-0.220589
	0.525603	3.03434		0.525603	3.09139		0.525603	3.04126		0.525603	3.09556			0.487917	0.0122413		0.49125	-0.170104		0.49125	0.0051558		0.487917	-0.222601
	0.532803	3.0335		0.532803	3.09353		0.532803	3.04202		0.532803	3.09414			0.494583	0.0119433		0.497917	-0.169963		0.497917	0.0051856		0.494583	-0.224695
	0.540003	3.03267		0.540003	3.0952		0.540003	3.0422		0.540003	3.09357			0.50125	0.0117049		0.504583	-0.170179		0.504583	0.00479817		0.50125	-0.226386
	0.547204	3.0321		0.547204	3.09615		0.547204	3.04163		0.547204	3.09408			0.507917	0.0116453		0.51125	-0.170715		0.51125	0.00394136		0.507917	-0.22763
	0.554404	3.03215		0.554404	3.09617		0.554404	3.0403		0.554404	3.09569			0.514583	0.0118166		0.517917	-0.171073		0.517917	0.00268966		0.514583	-0.228859
	0.561604	3.03301		0.561604	3.09507		0.561604	3.03838		0.561604	3.09825			0.52125	0.0120848		0.524583	-0.171661		0.524583	0.00158697		0.52125	-0.230342
	0.568804	3.0347		0.568804	3.09284		0.568804	3.03632		0.568804	3.10144			0.527917	0.0123382		0.53125	-0.172637		0.53125	0.000797212		0.527917	-0.23137
	0.576004	3.03707		0.576004	3.08968		0.576004	3.03464		0.576004	3.10482			0.534583	0.0126958		0.537917	-0.174455		0.537917	0.000424683		0.534583	-0.231519
	0.583204	3.03987		0.583204	3.08591		0.583204	3.03374		0.583204	3.10786			0.54125	0.0126213		0.544583	-0.176586		0.544583	0.000305474		0.54125	-0.231624
	0.590404	3.04283		0.590404	3.08189		0.590404	3.03383		0.590404	3.11011			0.547917	0.0121295		0.55125	-0.178739		0.55125	0.000327826		0.547917	-0.232331
	0.597604	3.04565		0.597604	3.07797		0.597604	3.03499		0.597604	3.11127			0.554583	0.0113696		0.557917	-0.180341		0.557917	0.000245869		0.554583	-0.233203
	0.604804	3.04798		0.604804	3.07444		0.604804	3.03718		0.604804	3.1112			0.56125	0.010781		0.564583	-0.181392		0.564583	0		0.56125	-0.234172
	0.612004	3.0495		0.612004	3.07155		0.612004	3.04026		0.612004	3.10997			0.567917	0.0103414		0.57125	-0.182249		0.57125	0.00013411		0.567917	-0.235736
	0.619204	3.05009		0.619204	3.06946		0.619204	3.04385		0.619204	3.10785			0.574583	0.00999868		0.577917	-0.182956		0.577917	0.000752509		0.574583	-0.237748
	0.626404	3.04978		0.626404	3.06818		0.626404	3.04738		0.626404	3.10528			0.58125	0.00998378		0.584583	-0.18353		0.584583	0.00153482		0.58125	-0.239648
	0.633604	3.04881		0.633604	3.06764		0.633604	3.0502		0.633604	3.1027			0.587917	0.0102669		0.59125	-0.184461		0.59125	0.00207126		0.587917	-0.241101
	0.640804	3.04741		0.640804	3.06771		0.640804	3.05192		0.640804	3.10054			0.594583	0.0106022		0.597917	-0.186153		0.597917	0.00257045		0.594583	-0.242561
	0.648004	3.04585		0.648004	3.06819		0.648004	3.05244		0.648004	3.09913			0.60125	0.0109449		0.604583	-0.187978		0.604583	0.0032559		0.60125	-0.243708
	0.655204	3.04436		0.655204	3.06896		0.655204	3.05189		0.655204	3.09865			0.607917	0.0111386		0.61125	-0.189371		0.61125	0.00372529		0.607917	-0.244588
	0.662404	3.04319		0.662404	3.06986		0.662404	3.05051		0.662404	3.09923			0.614583	0.0112876		0.617917	-0.189766		0.617917	0.00405312		0.614583	-0.245698
	0.669604	3.04253		0.669604	3.07078		0.669604	3.04856		0.669604	3.10082			0.62125	0.0113025		0.624583	-0.189997		0.624583	0.00434369		0.62125	-0.246994
	0.676804	3.04251		0.676804	3.07165		0.676804	3.04642		0.676804	3.10327			0.627917	0.0113696		0.63125	-0.189967		0.63125	0.00472367		0.627917	-0.248142
	0.684004	3.04321		0.684004	3.07241		0.684004	3.04457		0.684004	3.10629			0.634583	0.01169		0.637917	-0.190176		0.637917	0.00476092		0.634583	-0.249065
	0.691204	3.04455		0.691204	3.07303		0.691204	3.04341		0.691204	3.10959			0.64125	0.0120476		0.644583	-0.190593		0.644583	0.00433624		0.64125	-0.250138
	0.698404	3.04638		0.698404	3.07351		0.698404	3.04316		0.698404	3.11288			0.647917	0.0123382		0.65125	-0.191428		0.65125	0.00371039		0.647917	-0.251524
	0.705605	3.04848		0.705605	3.07391		0.705605	3.04374		0.705605	3.11588			0.654583	0.0119805		0.657917	-0.192612		0.657917	0.00292808		0.654583	-0.252768
	0.712805	3.05049		0.712805	3.07434		0.712805	3.04483		0.712805	3.11832			0.66125	0.0111908		0.664583	-0.193611		0.664583	0.00196695		0.66125	-0.254273
	0.720005	3.05208		0.720005	3.07495		0.720005	3.04608		0.720005	3.12008			0.667917	0.0103414		0.67125	-0.194214		0.67125	0.00119209		0.667917	-0.255898
	0.727205	3.05293		0.727205	3.07584		0.727205	3.04714		0.727205	3.1211			0.674583	0.00982732		0.677917	-0.194639		0.677917	0.00150502		0.674583	-0.257276
	0.734405	3.05288		0.734405	3.07708		0.734405	3.04778		0.734405	3.12141			0.68125	0.00938028		0.684583	-0.195161		0.684583	0.00249594		0.68125	-0.258408
	0.741605	3.05193		0.741605	3.07864		0.741605	3.04782		0.741605	3.12109			0.687917	0.0089854		0.69125	-0.195965		0.69125	0.00336766		0.687917	-0.25966
	0.748805	3.05024		0.748805	3.08043		0.748805	3.04719		0.748805	3.12026			0.694583	0.00882149		0.697917	-0.196889		0.697917	0.0038296		0.694583	-0.261195
	0.756005	3.04807		0.756005	3.08226		0.756005	3.04592		0.756005	3.11905			0.70125	0.00889599		0.704583	-0.197805		0.704583	0.0044331		0.70125	-0.26276
	0.763205	3.04574		0.763205	3.08388		0.763205	3.04416		0.763205	3.11763			0.707917	0.0089854		0.71125	-0.198722		0.71125	0.00522286		0.707917	-0.264391
	0.770405	3.0436		0.770405	3.08501		0.770405	3.04217		0.770405	3.11611			0.714583	0.00906736		0.717917	-0.199363		0.717917	0.00581145		0.714583	-0.266306
	0.777605	3.04187		0.777605	3.08542		0.777605	3.04024		0.777605	3.11444			0.72125	0.00943989		0.724583	-0.20007		0.724583	0.00593066		0.72125	-0.268057
	0.784805	3.04065		0.784805	3.08502		0.784805	3.03852		0.784805	3.11251			0.727917	0.00999868		0.73125	-0.200659		0.73125	0.00555813		0.727917	-0.269301
	0.792005	3.03981		0.792005	3.08381		0.792005	3.03707		0.792005	3.1102			0.734583	0.0108853		0.737917	-0.201151		0.737917	0.00499934		0.734583	-0.270396
	0.799205	3.0391		0.799205	3.08185		0.799205	3.03577		0.799205	3.10745			0.74125	0.0117868		0.744583	-0.201441		0.744583	0.00447035		0.74125	-0.271507
	0.806405	3.03823		0.806405	3.07926		0.806405	3.03443		0.806405	3.10428			0.747917	0.0123605		0.75125	-0.201963		0.75125	0.00397116		0.747917	-0.272654
	0.813605	3.03703		0.813605	3.07625		0.813605	3.03296		0.813605	3.10076			0.754583	0.0123382		0.757917	-0.202619		0.757917	0.00324845		0.754583	-0.273459
	0.820805	3.03546		0.820805	3.07314		0.820805	3.03132		0.820805	3.09708			0.76125	0.0119656		0.764583	-0.203118		0.764583	0.00248104		0.76125	-0.274375
	0.828005	3.03363		0.828005	3.07029		0.828005	3.02949		0.828005	3.09355			0.767917	0.0113174		0.77125	-0.203557		0.77125	0.00243634		0.767917	-0.275746
	0.835205	3.0318		0.835205	3.06798		0.835205	3.02747		0.835205	3.09059			0.774583	0.0101402		0.777917	-0.204355		0.777917	0.0031665		0.774583	-0.277348
	0.842405	3.03032		0.842405	3.06635		0.842405	3.02528		0.842405	3.08848			0.78125	0.00888854		0.784583	-0.205904		0.784583	0.00393391		0.78125	-0.278622
	0.849605	3.02956		0.849605	3.06554		0.849605	3.02309		0.849605	3.08733			0.787917	0.00820309		0.79125	-0.207514		0.79125	0.00442564		0.787917	-0.279568
	0.856805	3.02985		0.856805	3.06572		0.856805	3.0212		0.856805	3.08701			0.794583	0.00827014		0.797917	-0.209026		0.797917	0.00472367		0.794583	-0.280701
	0.864006	3.03131		0.864006	3.067		0.864006	3.01992		0.864006	3.08733			0.80125	0.0083968		0.804583	-0.210181		0.804583	0.00500679		0.80125	-0.281982
	0.871206	3.03381		0.871206	3.06939		0.871206	3.01935		0.871206	3.08802			0.807917	0.00849366		0.81125	-0.210948		0.81125	0.00482798		0.807917	-0.282757
	0.878406	3.03695		0.878406	3.07269		0.878406	3.01949		0.878406	3.08881			0.814583	0.00869483		0.817917	-0.211544		0.817917	0.00391155		0.814583	-0.282608
	0.885606	3.04028		0.885606	3.07653		0.885606	3.02027		0.885606	3.08939			0.82125	0.00911206		0.824583	-0.212073		0.824583	0.00292063		0.82125	-0.282392
	0.892806	3.04343		0.892806	3.08049		0.892806	3.02171		0.892806	3.08954			0.827917	0.00940263		0.83125	-0.212833		0.83125	0.00224262		0.827917	-0.282869
	0.900006	3.04611		0.900006	3.08418		0.900006	3.02384		0.900006	3.08925			0.834583	0.00937283		0.837917	-0.213996		0.837917	0.00213087		0.834583	-0.284024
	0.907206	3.04816		0.907206	3.08725		0.907206	3.02662		0.907206	3.08882			0.84125	0.00935793		0.844583	-0.215687		0.844583	0.0026077		0.84125	-0.285253
	0.914406	3.04942		0.914406	3.08942		0.914406	3.02987		0.914406	3.08866			0.847917	0.00919402		0.85125	-0.217922		0.85125	0.00356883		0.847917	-0.286706
	0.921606	3.04991		0.921606	3.09052		0.921606	3.03341		0.921606	3.0891			0.854583	0.00897795		0.857917	-0.220016		0.857917	0.00487268		0.854583	-0.288837
	0.928806	3.04981		0.928806	3.09054		0.928806	3.03709		0.928806	3.09031			0.86125	0.00862777		0.864583	-0.221416		0.864583	0.00590831		0.86125	-0.291146
	0.936006	3.04944		0.936006	3.08962		0.936006	3.0408		0.936006	3.09234			0.867917	0.00847876		0.87125	-0.222109		0.87125	0.00669807		0.867917	-0.292718
	0.943206	3.049		0.943206	3.08801		0.943206	3.04437		0.943206	3.09508			0.874583	0.00849366		0.877917	-0.222169		0.877917	0.00695139		0.874583	-0.293382
	0.950406	3.0485		0.950406	3.08599		0.950406	3.04767		0.950406	3.09833			0.88125	0.00862777		0.884583	-0.222147		0.884583	0.00654906		0.88125	-0.294067
	0.957606	3.04786		0.957606	3.08381		0.957606	3.05057		0.957606	3.10171			0.887917	0.00905991		0.89125	-0.22199		0.89125	0.00555813		0.887917	-0.295006
	0.964806	3.047		0.964806	3.08162		0.964806	3.05303		0.964806	3.10475			0.894583	0.00985712		0.897917	-0.221699		0.897917	0.00458956		0.894583	-0.295974
	0.972006	3.04592		0.972006	3.07948		0.972006	3.05502		0.972006	3.10705			0.90125	0.0108257		0.904583	-0.221767		0.904583	0.00435114		0.90125	-0.296772
	0.979206	3.04469		0.979206	3.0774		0.979206	3.05652		0.979206	3.10841			0.907917	0.0115633		0.91125	-0.222288		0.91125	0.00439584		0.907917	-0.297651
	0.986406	3.04331		0.986406	3.07541		0.986406	3.05743		0.986406	3.10882			0.914583	0.0119954		0.917917	-0.2231		0.917917	0.00460446		0.914583	-0.298955
	0.993606	3.04185		0.993606	3.07362		0.993606	3.0577		0.993606	3.10844			0.92125	0.0121519		0.924583	-0.223562		0.924583	0.00485778		0.92125	-0.300601
	1.00081	3.04052		1.00081	3.07214		1.00081	3.05731		1.00081	3.10751			0.927917	0.012368		0.93125	-0.223838		0.93125	0.00570714		0.927917	-0.302017
	1.00801	3.03962		1.00801	3.07106		1.00801	3.0563		1.00801	3.10624			0.934583	0.0122264		0.937917	-0.224419		0.937917	0.00701845		0.934583	-0.302926
	1.01521	3.03938		1.01521	3.07038		1.01521	3.05473		1.01521	3.10493			0.94125	0.0115409		0.944583	-0.225142		0.944583	0.00796467		0.94125	-0.303447
	1.02241	3.03989		1.02241	3.06999		1.02241	3.05266		1.02241	3.10374			0.947917	0.0109673		0.95125	-0.225857		0.95125	0.00847876		0.947917	-0.304461
	1.02961	3.04099		1.02961	3.06979		1.02961	3.05027		1.02961	3.10282			0.954583	0.0110492		0.957917	-0.226632		0.957917	0.00863522		0.954583	-0.305831
	1.03681	3.04245		1.03681	3.06966		1.03681	3.04779		1.03681	3.10211			0.96125	0.0116974		0.964583	-0.227757		0.964583	0.00900775		0.96125	-0.307441
	1.04401	3.04399		1.04401	3.06956		1.04401	3.0455		1.04401	3.10154			0.967917	0.0120178		0.97125	-0.229038		0.97125	0.00905991		0.967917	-0.309266
	1.05121	3.04529		1.05121	3.06947		1.05121	3.04362		1.05121	3.101			0.974583	0.0124946		0.977917	-0.229895		0.977917	0.00866503		0.974583	-0.311621
	1.05841	3.04621		1.05841	3.06933		1.05841	3.0422		1.05841	3.10043			0.98125	0.0132695		0.984583	-0.229955		0.984583	0.00800192		0.98125	-0.314429
	1.06561	3.0467		1.06561	3.06913		1.06561	3.04123		1.06561	3.09982			0.987917	0.0138432		0.99125	-0.229761		0.99125	0.00727922		0.987917	-0.317059
	1.07281	3.04686		1.07281	3.06895		1.07281	3.04062		1.07281	3.09917			0.994583	0.0134781		0.997917	-0.229828		0.997917	0.00684708		0.994583	-0.319533
	1.08001	3.04686		1.08001	3.06899		1.08001	3.04031		1.08001	3.09854			1.00125	0.0122935		1.00458	-0.230335		1.00458	0.00634789		1.00125	-0.321604
	1.08721	3.04692		1.08721	3.06939		1.08721	3.0403		1.08721	3.09802			1.00792	0.01131		1.01125	-0.230923		1.01125	0.00604242		1.00792	-0.32334
	1.09441	3.04721		1.09441	3.07022		1.09441	3.04052		1.09441	3.09777			1.01458	0.0105873		1.01792	-0.231519		1.01792	0.0057146		1.01458	-0.32445
	1.10161	3.04782		1.10161	3.07141		1.10161	3.04096		1.10161	3.09792			1.02125	0.0102893		1.02458	-0.232391		1.02458	0.00526011		1.02125	-0.325359
	1.10881	3.04869		1.10881	3.07292		1.10881	3.04157		1.10881	3.09851			1.02792	0.0101775		1.03125	-0.23333		1.03125	0.00466406		1.02792	-0.326104
	1.11601	3.04951		1.11601	3.07476		1.11601	3.04226		1.11601	3.0995			1.03458	0.0106543		1.03792	-0.234142		1.03792	0.00378489		1.03458	-0.326537
	1.12321	3.04989		1.12321	3.07698		1.12321	3.04292		1.12321	3.10079			1.04125	0.0119209		1.04458	-0.234492		1.04458	0.00312179		1.04125	-0.326402
	1.13041	3.04947		1.13041	3.07959		1.13041	3.04342		1.13041	3.10234			1.04792	0.013195		1.05125	-0.234827		1.05125	0.00271946		1.04792	-0.326037
	1.13761	3.04804		1.13761	3.08249		1.13761	3.04366		1.13761	3.10404			1.05458	0.0137985		1.05792	-0.235565		1.05792	0.00265986		1.05458	-0.325903
	1.14481	3.04564		1.14481	3.08545		1.14481	3.04351		1.14481	3.1058			1.06125	0.0134185		1.06458	-0.236511		1.06458	0.00309944		1.06125	-0.326239
	1.15201	3.04242		1.15201	3.08815		1.15201	3.04285		1.15201	3.10752			1.06792	0.0126883		1.07125	-0.237666		1.07125	0.00400096		1.06792	-0.326924
	1.15921	3.03868		1.15921	3.09022		1.15921	3.0416		1.15921	3.10912			1.07458	0.0118613		1.07792	-0.238523		1.07792	0.00483543		1.07458	-0.327893
	1.16641	3.03484		1.16641	3.09128		1.16641	3.03971		1.16641	3.11053			1.08125	0.010632		1.08458	-0.239141		1.08458	0.00519305		1.08125	-0.329487
	1.17361	3.03133		1.17361	3.09102		1.17361	3.03738		1.17361	3.11167			1.08792	0.00923127		1.09125	-0.239581		1.09125	0.00497699		1.08792	-0.331037
	1.18081	3.0286		1.18081	3.08931		1.18081	3.03487		1.18081	3.11248			1.09458	0.00831485		1.09792	-0.240184		1.09792	0.00504404		1.09458	-0.332363
	1.18801	3.02694		1.18801	3.0863		1.18801	3.03245		1.18801	3.11289			1.10125	0.00845641		1.10458	-0.241287		1.10458	0.00526756		1.10125	-0.333004
	1.19521	3.02647		1.19521	3.08248		1.19521	3.03034		1.19521	3.11285			1.10792	0.00922382		1.11125	-0.242129		1.11125	0.00551343		1.10792	-0.333495
	1.20241	3.02719		1.20241	3.07842		1.20241	3.02863		1.20241	3.11231			1.11458	0.00995398		1.11792	-0.242785		1.11792	0.00597537		1.11458	-0.333995
	1.20961	3.02895		1.20961	3.0748		1.20961	3.02745		1.20961	3.11125			1.12125	0.0105277		1.12458	-0.2435		1.12458	0.00679493		1.12125	-0.3343
	1.21681	3.03161		1.21681	3.07218		1.21681	3.027		1.21681	3.10971			1.12792	0.0110641		1.13125	-0.244685		1.13125	0.00751019		1.12792	-0.334859
	1.22401	3.03487		1.22401	3.07094		1.22401	3.02745		1.22401	3.10777			1.13458	0.0108778		1.13792	-0.246115		1.13792	0.00716001		1.13458	-0.33576
	1.23121	3.03841		1.23121	3.07115		1.23121	3.02886		1.23121	3.10565			1.14125	0.0100657		1.14458	-0.247069		1.14458	0.00599772		1.14125	-0.33728
	1.23841	3.04189		1.23841	3.07259		1.23841	3.03106		1.23841	3.10355			1.14792	0.00909716		1.15125	-0.247575		1.15125	0.00493228		1.14792	-0.339165
	1.24561	3.04495		1.24561	3.07478		1.24561	3.03378		1.24561	3.10172			1.15458	0.00870228		1.15792	-0.247948		1.15792	0.00409037		1.15458	-0.341147
	1.25281	3.04723		1.25281	3.07714		1.25281	3.03668		1.25281	3.10035			1.16125	0.00867993		1.16458	-0.248477		1.16458	0.00298768		1.16125	-0.343017
	1.26001	3.04844		1.26001	3.07921		1.26001	3.0395		1.26001	3.0996			1.16792	0.00863522		1.17125	-0.249073		1.17125	0.00198931		1.16792	-0.344664
	1.26721	3.04838		1.26721	3.08069		1.26721	3.04202		1.26721	3.09961			1.17458	0.00911206		1.17792	-0.249393		1.17792	0.00169873		1.17458	-0.346377
	1.27441	3.04704		1.27441	3.08148		1.27441	3.04413		1.27441	3.10045			1.18125	0.00959635		1.18458	-0.249773		1.18458	0.00218302		1.18125	-0.348367
	1.28161	3.04464		1.28161	3.08166		1.28161	3.04576		1.28161	3.10209			1.18792	0.0096783		1.19125	-0.250556		1.19125	0.00242144		1.18792	-0.35014
	1.28881	3.04151		1.28881	3.08143		1.28881	3.04697		1.28881	3.10434			1.19458	0.00914931		1.19792	-0.251703		1.19792	0.00217557		1.19458	-0.351392
	1.29601	3.03809		1.29601	3.08111		1.29601	3.04786		1.29601	3.10692			1.20125	0.00867248		1.20458	-0.252888		1.20458	0.00172108		1.20125	-0.352181
	1.30321	3.03473		1.30321	3.08099		1.30321	3.04853		1.30321	3.10957			1.20792	0.00844896		1.21125	-0.253879		1.21125	0.00128895		1.20792	-0.352837
	1.31041	3.03177		1.31041	3.08133		1.31041	3.04909		1.31041	3.11208			1.21458	0.00822544		1.21792	-0.254631		1.21792	0.000983477		1.21458	-0.353366
	1.31761	3.0294		1.31761	3.08215		1.31761	3.04953		1.31761	3.11425			1.22125	0.00938773		1.22458	-0.255279		1.22458	0.000961125		1.22125	-0.353456
	1.32481	3.02774		1.32481	3.08338		1.32481	3.04977		1.32481	3.1159			1.22792	0.0132769		1.23125	-0.255853		1.23125	0.00124425		1.22792	-0.353344
	1.33201	3.02668		1.33201	3.08481		1.33201	3.04962		1.33201	3.11693			1.23458	0.0179484		1.23792	-0.256352		1.23792	0.00181794		1.23458	-0.353478
	1.33921	3.02595		1.33921	3.08621		1.33921	3.04882		1.33921	3.11732			1.24125	0.0210851		1.24458	-0.256732		1.24458	0.00251085		1.24125	-0.354007
	1.34641	3.02529		1.34641	3.08736		1.34641	3.04723		1.34641	3.11716			1.24792	0.0215396		1.25125	-0.257023		1.25125	0.00350177		1.24792	-0.355028
	1.35361	3.02456		1.35361	3.08807		1.35361	3.04497		1.35361	3.11658			1.25458	0.02148		1.25792	-0.257388		1.25792	0.00433624		1.25458	-0.356369
	1.36081	3.02382		1.36081	3.08827		1.36081	3.04233		1.36081	3.1157			1.26125	0.020653		1.26458	-0.257656		1.26458	0.00466406		1.26125	-0.357732
	1.36801	3.02331		1.36801	3.08809		1.36801	3.03975		1.36801	3.1145			1.26792	0.0181124		1.27125	-0.257947		1.27125	0.00497699		1.26792	-0.358917
	1.37521	3.02328		1.37521	3.08775		1.37521	3.03764		1.37521	3.11301			1.27458	0.0150427		1.27792	-0.258297		1.27792	0.00543892		1.27458	-0.360139
	1.38241	3.02394		1.38241	3.08751		1.38241	3.03627		1.38241	3.11129			1.28125	0.0128597		1.28458	-0.258826		1.28458	0.00599027		1.28125	-0.361823
	1.38961	3.02538		1.38961	3.08757		1.38961	3.03587		1.38961	3.1094			1.28792	0.012517		1.29125	-0.259697		1.29125	0.00601262		1.28792	-0.363551
	1.39681	3.02763		1.39681	3.08811		1.39681	3.03652		1.39681	3.10741			1.29458	0.0124723		1.29792	-0.260718		1.29792	0.00563264		1.29458	-0.364736
	1.40401	3.0306		1.40401	3.08917		1.40401	3.03813		1.40401	3.10541			1.30125	0.0121221		1.30458	-0.261806		1.30458	0.00531226		1.30125	-0.365511
	1.41121	3.03406		1.41121	3.09073		1.41121	3.04034		1.41121	3.10349			1.30792	0.0111684		1.31125	-0.262819		1.31125	0.00483543		1.30792	-0.366285
	1.41841	3.03765		1.41841	3.09263		1.41841	3.04263		1.41841	3.10183			1.31458	0.0100657		1.31792	-0.263691		1.31792	0.00442564		1.31458	-0.367314
	1.42561	3.04093		1.42561	3.09459		1.42561	3.0444		1.42561	3.10051			1.32125	0.00937283		1.32458	-0.264466		1.32458	0.00428408		1.32125	-0.368245
	1.43281	3.04357		1.43281	3.09634		1.43281	3.04521		1.43281	3.09959			1.32792	0.00965595		1.33125	-0.264578		1.33125	0.00457466		1.32792	-0.368975
	1.44001	3.0454		1.44001	3.09768		1.44001	3.04485		1.44001	3.09899			1.33458	0.010401		1.33792	-0.264607		1.33792	0.0051856		1.33458	-0.369854
	1.44721	3.04646		1.44721	3.09849		1.44721	3.0434		1.44721	3.09857			1.34125	0.0108629		1.34458	-0.264756		1.34458	0.00558048		1.34125	-0.370935
	1.45441	3.04697		1.45441	3.09871		1.45441	3.04106		1.45441	3.09813			1.34792	0.0108406		1.35125	-0.264853		1.35125	0.0057444		1.34792	-0.372082
	1.46161	3.04709		1.46161	3.09832		1.46161	3.03822		1.46161	3.09751			1.35458	0.0106096		1.35792	-0.264801		1.35792	0.00551343		1.35458	-0.37282
	1.46881	3.04701		1.46881	3.09734		1.46881	3.03532		1.46881	3.09662			1.36125	0.0104904		1.36458	-0.264578		1.36458	0.00491738		1.36125	-0.373237
	1.47601	3.04683		1.47601	3.09591		1.47601	3.03285		1.47601	3.09548			1.36792	0.0104383		1.37125	-0.264741		1.37125	0.00404567		1.36792	-0.373729
	1.48321	3.04665		1.48321	3.09413		1.48321	3.03125		1.48321	3.09419			1.37458	0.010401		1.37792	-0.265054		1.37792	0.00311434		1.37458	-0.374407
	1.49041	3.04652		1.49041	3.09209		1.49041	3.03087		1.49041	3.09288			1.38125	0.0107288		1.38458	-0.265211		1.38458	0.00227988		1.38125	-0.375338
	1.49761	3.04642		1.49761	3.08986		1.49761	3.03181		1.49761	3.09167			1.38792	0.0113696		1.39125	-0.265382		1.39125	0.00177324		1.38792	-0.376381
	1.50481	3.04626		1.50481	3.08754		1.50481	3.03389		1.50481	3.09061			1.39458	0.0120997		1.39792	-0.26603		1.39792	0.00131875		1.39458	-0.37773
	1.51201	3.04591		1.51201	3.0853		1.51201	3.03664		1.51201	3.08973			1.40125	0.0126362		1.40458	-0.267327		1.40458	0.00102073		1.40125	-0.37913
	1.51921	3.04527		1.51921	3.08335		1.51921	3.03956		1.51921	3.08903			1.40792	0.0128299		1.41125	-0.269279		1.41125	0.0012815		1.40792	-0.380546
	1.52641	3.0443		1.52641	3.08187		1.52641	3.04219		1.52641	3.08849			1.41458	0.0124723		1.41792	-0.271261		1.41792	0.00204891		1.41458	-0.381917
	1.53361	3.0431		1.53361	3.08097		1.53361	3.04424		1.53361	3.08807			1.42125	0.0117719		1.42458	-0.273168		1.42458	0.00269711		1.42125	-0.383258
	1.54081	3.04174		1.54081	3.08067		1.54081	3.04543		1.54081	3.08775			1.42792	0.011079		1.43125	-0.27509		1.43125	0.00248104		1.42792	-0.384569
	1.54801	3.0403		1.54801	3.08097		1.54801	3.04567		1.54801	3.08756			1.43458	0.0106916		1.43792	-0.276782		1.43792	0.00206381		1.43458	-0.385612
	1.55521	3.03881		1.55521	3.08176		1.55521	3.04496		1.55521	3.08757			1.44125	0.0104383		1.44458	-0.278093		1.44458	0.00225753		1.44125	-0.3867
	1.56241	3.03724		1.56241	3.08285		1.56241	3.04354		1.56241	3.08799			1.44792	0.0100061		1.45125	-0.278704		1.45125	0.00265241		1.44792	-0.387676
	1.56961	3.03567		1.56961	3.08397		1.56961	3.04178		1.56961	3.08896			1.45458	0.00965595		1.45792	-0.279121		1.45792	0.00282377		1.45458	-0.388607
	1.57681	3.03425		1.57681	3.08477		1.57681	3.03995		1.57681	3.09051			1.46125	0.00941753		1.46458	-0.279412		1.46458	0.00308454		1.46125	-0.389367
	1.58401	3.03318		1.58401	3.08498		1.58401	3.03817		1.58401	3.09253			1.46792	0.00936538		1.47125	-0.279434		1.47125	0.00386685		1.46792	-0.390157
	1.59121	3.03263		1.59121	3.08448		1.59121	3.03641		1.59121	3.09475			1.47458	0.00943244		1.47792	-0.279337		1.47792	0.00481308		1.47458	-0.39117
	1.59841	3.03275		1.59841	3.08341		1.59841	3.03463		1.59841	3.0969			1.48125	0.00951439		1.48458	-0.279203		1.48458	0.00524521		1.48125	-0.392094
	1.60561	3.03363		1.60561	3.08204		1.60561	3.03283		1.60561	3.09871			1.48792	0.00979751		1.49125	-0.279523		1.49125	0.00558048		1.48792	-0.392936
	1.61281	3.0353		1.61281	3.08058		1.61281	3.03105		1.61281	3.09997			1.49458	0.010401		1.49792	-0.279948		1.49792	0.00602007		1.49458	-0.393994
	1.62001	3.03769		1.62001	3.07924		1.62001	3.02938		1.62001	3.1005			1.50125	0.0112206		1.50458	-0.280708		1.50458	0.00640005		1.50125	-0.395395
	1.62721	3.04053		1.62721	3.07816		1.62721	3.02794		1.62721	3.10027			1.50792	0.0117496		1.51125	-0.281803		1.51125	0.00672042		1.50792	-0.396959
	1.63441	3.0434		1.63441	3.07744		1.63441	3.02697		1.63441	3.09943			1.51458	0.0119656		1.51792	-0.28301		1.51792	0.00703335		1.51458	-0.398241
	1.64161	3.04581		1.64161	3.07707		1.64161	3.02672		1.64161	3.09828			1.52125	0.012055		1.52458	-0.28412		1.52458	0.00727177		1.52125	-0.399426
	1.64881	3.04741		1.64881	3.07686		1.64881	3.02739		1.64881	3.09715			1.52792	0.0120178		1.53125	-0.284307		1.53125	0.00686944		1.52792	-0.400655
	1.65601	3.04806		1.65601	3.07647		1.65601	3.02898		1.65601	3.09635			1.53458	0.0115559		1.53792	-0.284091		1.53792	0.00602007		1.53458	-0.401787
	1.66321	3.04779		1.66321	3.07558		1.66321	3.03133		1.66321	3.09604			1.54125	0.01093		1.54458	-0.2838		1.54458	0.00521541		1.54125	-0.403054
	1.67041	3.04683		1.67041	3.07407		1.67041	3.03406		1.67041	3.09621			1.54792	0.0108406		1.55125	-0.283964		1.55125	0.00462681		1.54792	-0.404514
	1.67761	3.04547		1.67761	3.07202		1.67761	3.0367		1.67761	3.09669			1.55458	0.0109747		1.55792	-0.284463		1.55792	0.004448		1.55458	-0.405788
	1.68481	3.04406		1.68481	3.06975		1.68481	3.03885		1.68481	3.09718			1.56125	0.0111535		1.56458	-0.284955		1.56458	0.00438094		1.56125	-0.406526
	1.69201	3.04292		1.69201	3.06762		1.69201	3.04022		1.69201	3.09734			1.56792	0.0111461		1.57125	-0.285953		1.57125	0.00431389		1.56792	-0.407092
	1.69921	3.04223		1.69921	3.06604		1.69921	3.0407		1.69921	3.09693			1.57458	0.0112578		1.57792	-0.28719		1.57792	0.00391901		1.57458	-0.408038
	1.70641	3.04193		1.70641	3.06527		1.70641	3.04033		1.70641	3.09587			1.58125	0.0110641		1.58458	-0.288278		1.58458	0.0031665		1.58125	-0.409313
	1.71361	3.04174		1.71361	3.06553		1.71361	3.03932		1.71361	3.09426			1.58792	0.0104383		1.59125	-0.288963		1.59125	0.00247359		1.58792	-0.410423
	1.72081	3.04134		1.72081	3.06684		1.72081	3.03798		1.72081	3.09237			1.59458	0.00987202		1.59792	-0.28947		1.59792	0.00172853		1.59458	-0.4116
	1.72801	3.04046		1.72801	3.06906		1.72801	3.03668		1.72801	3.09058			1.60125	0.00950694		1.60458	-0.290416		1.60458	0.00143051		1.60125	-0.412799
	1.73521	3.03898		1.73521	3.07189		1.73521	3.03575		1.73521	3.08932			1.60792	0.0096187		1.61125	-0.291042		1.61125	0.00176579		1.60792	-0.413395
	1.74241	3.03704		1.74241	3.07491		1.74241	3.03532		1.74241	3.08895			1.61458	0.00996888		1.61792	-0.291124		1.61792	0.00261515		1.61458	-0.413299
	1.74961	3.03485		1.74961	3.07769		1.74961	3.03532		1.74961	3.0896			1.62125	0.0105873		1.62458	-0.290982		1.62458	0.00333786		1.62125	-0.41274
	1.75681	3.03277		1.75681	3.07992		1.75681	3.03558		1.75681	3.09117			1.62792	0.0111461		1.63125	-0.290945		1.63125	0.00370294		1.62792	-0.412405
	1.76401	3.03122		1.76401	3.08143		1.76401	3.03599		1.76401	3.09335			1.63458	0.0114292		1.63792	-0.291035		1.63792	0.00416487		1.63458	-0.412717
	1.77121	3.03056		1.77121	3.08221		1.77121	3.03643		1.77121	3.09573			1.64125	0.0115335		1.64458	-0.290938		1.64458	0.00479072		1.64125	-0.413805
	1.77841	3.031		1.77841	3.08233		1.77841	3.03684		1.77841	3.09793			1.64792	0.0116304		1.65125	-0.291005		1.65125	0.00538677		1.64792	-0.415526
	1.78561	3.0326		1.78561	3.0819		1.78561	3.03711		1.78561	3.09961			1.65458	0.0119433		1.65792	-0.291549		1.65792	0.0057891		1.65458	-0.417165
	1.79281	3.03518		1.79281	3.08102		1.79281	3.03715		1.79281	3.10059			1.66125	0.0122711		1.66458	-0.292487		1.66458	0.00640005		1.66125	-0.418447
	1.80001	3.0384		1.80001	3.07988		1.80001	3.03701		1.80001	3.10086			1.66792	0.0125319		1.67125	-0.293583		1.67125	0.00713766		1.66792	-0.419647
	1.80721	3.04189		1.80721	3.07873		1.80721	3.03688		1.80721	3.10067			1.67458	0.0124797		1.67792	-0.294924		1.67792	0.00736117		1.67458	-0.420667
	1.81441	3.04531		1.81441	3.07782		1.81441	3.03694		1.81441	3.10035			1.68125	0.0124276		1.68458	-0.295974		1.68458	0.00678003		1.68125	-0.421353
	1.82161	3.04841		1.82161	3.07724		1.82161	3.03726		1.82161	3.10026			1.68792	0.0122711		1.69125	-0.296861		1.69125	0.00581145		1.68792	-0.421926
	1.82881	3.05105		1.82881	3.07695		1.82881	3.03782		1.82881	3.10064			1.69458	0.0120997		1.69792	-0.297695		1.69792	0.00493973		1.69458	-0.423037
	1.83601	3.05325		1.83601	3.07685		1.83601	3.03857		1.83601	3.10163			1.70125	0.0119805		1.70458	-0.298537		1.70458	0.00458211		1.70125	-0.424489
	1.84321	3.05507		1.84321	3.07685		1.84321	3.03958		1.84321	3.10322			1.70792	0.0121072		1.71125	-0.299223		1.71125	0.0045076		1.70792	-0.425585
	1.85041	3.0566		1.85041	3.07689		1.85041	3.04096		1.85041	3.10529			1.71458	0.0125319		1.71792	-0.299528		1.71792	0.00458211		1.71458	-0.426054
	1.85761	3.05783		1.85761	3.07689		1.85761	3.04266		1.85761	3.10758			1.72125	0.0129417		1.72458	-0.30005		1.72458	0.00458211		1.72125	-0.426486
	1.86481	3.05876		1.86481	3.0767		1.86481	3.04456		1.86481	3.10977			1.72792	0.0129938		1.73125	-0.30072		1.73125	0.00467151		1.72792	-0.427201
	1.87201	3.05938		1.87201	3.07617		1.87201	3.04644		1.87201	3.11154			1.73458	0.0125393		1.73792	-0.301294		1.73792	0.0051409		1.73458	-0.427812
	1.87921	3.05966		1.87921	3.07528		1.87921	3.0481		1.87921	3.11269			1.74125	0.0117198		1.74458	-0.301465		1.74458	0.00543147		1.74125	-0.428244
	1.88641	3.05953		1.88641	3.07418		1.88641	3.04944		1.88641	3.11313			1.74792	0.0111163		1.75125	-0.301324		1.75125	0.0051111		1.74792	-0.428773
	1.89361	3.05885		1.89361	3.0731		1.89361	3.05036		1.89361	3.11293			1.75458	0.0110045		1.75792	-0.300921		1.75792	0.00462681		1.75458	-0.429682
	1.90081	3.05756		1.90081	3.07226		1.90081	3.05074		1.90081	3.11225			1.76125	0.0114068		1.76458	-0.300549		1.76458	0.00435114		1.76125	-0.430852
	1.90801	3.05574		1.90801	3.07174		1.90801	3.05054		1.90801	3.11129			1.76792	0.0122264		1.77125	-0.300653		1.77125	0.00401586		1.76792	-0.432111
	1.91521	3.05364		1.91521	3.07155		1.91521	3.0498		1.91521	3.11019			1.77458	0.0133961		1.77792	-0.301354		1.77792	0.00327826		1.77458	-0.433199
	1.92241	3.05149		1.92241	3.0716		1.92241	3.04874		1.92241	3.109			1.78125	0.0148714		1.78458	-0.302576		1.78458	0.00230223		1.78125	-0.434093
	1.92961	3.04947		1.92961	3.07178		1.92961	3.04761		1.92961	3.10766			1.78792	0.0158846		1.79125	-0.303999		1.79125	0.00183284		1.78792	-0.435069
	1.93681	3.04769		1.93681	3.0719		1.93681	3.04661		1.93681	3.10608			1.79458	0.0161231		1.79792	-0.305504		1.79792	0.00175089		1.79458	-0.436172
	1.94401	3.04627		1.94401	3.0717		1.94401	3.04587		1.94401	3.10419			1.80125	0.0158176		1.80458	-0.30686		1.80458	0.00203401		1.80125	-0.43726
	1.95121	3.04536		1.95121	3.07096		1.95121	3.04545		1.95121	3.10199			1.80792	0.0155792		1.81125	-0.30797		1.81125	0.0025183		1.80792	-0.438109
	1.95841	3.04501		1.95841	3.06966		1.95841	3.04543		1.95841	3.09948			1.81458	0.0153035		1.81792	-0.308655		1.81792	0.00304729		1.81458	-0.439048
	1.96561	3.04511		1.96561	3.06789		1.96561	3.04585		1.96561	3.09672			1.82125	0.0145212		1.82458	-0.309177		1.82458	0.00366569		1.82125	-0.440523
	1.97281	3.04541		1.97281	3.06596		1.97281	3.04658		1.97281	3.09387			1.82792	0.0135601		1.83125	-0.309624		1.83125	0.00397116		1.82792	-0.442453
	1.98001	3.04568		1.98001	3.06416		1.98001	3.04738		1.98001	3.0912			1.83458	0.0129119		1.83792	-0.310376		1.83792	0.0038594		1.83458	-0.444673
	1.98721	3.04575		1.98721	3.0628		1.98721	3.0479		1.98721	3.08898			1.84125	0.0123456		1.84458	-0.311203		1.84458	0.0031665		1.84125	-0.446796
	1.99441	3.04552		1.99441	3.06204		1.99441	3.04797		1.99441	3.0874			1.84792	0.0114217		1.85125	-0.311673		1.85125	0.00264496		1.84792	-0.448585
	2.00161	3.04491		2.00161	3.06196		2.00161	3.0476		2.00161	3.08649			1.85458	0.0102594		1.85792	-0.311904		1.85792	0.00261515		1.85458	-0.449911
	2.00881	3.04384		2.00881	3.0625		2.00881	3.04691		2.00881	3.08614			1.86125	0.00973791		1.86458	-0.311978		1.86458	0.00286847		1.86125	-0.450537
	2.01601	3.0423		2.01601	3.06349		2.01601	3.04601		2.01601	3.08624			1.86792	0.00989437		1.87125	-0.312544		1.87125	0.00337511		1.86792	-0.450157
	2.02321	3.04033		2.02321	3.06478		2.02321	3.04499		2.02321	3.08672			1.87458	0.0101179		1.87792	-0.313021		1.87792	0.00409037		1.87458	-0.449374
	2.03041	3.03801		2.03041	3.06623		2.03041	3.04404		2.03041	3.08748			1.88125	0.0104308		1.88458	-0.313267		1.88458	0.00474602		1.88125	-0.449218
	2.03761	3.03555		2.03761	3.06776		2.03761	3.04353		2.03761	3.0884			1.88792	0.0109822		1.89125	-0.313386		1.89125	0.00470132		1.88792	-0.449859
	2.04481	3.03308		2.04481	3.06926		2.04481	3.04379		2.04481	3.0893			1.89458	0.0120252		1.89792	-0.313506		1.89792	0.00423193		1.89458	-0.450976
	2.05201	3.0308		2.05201	3.07066		2.05201	3.04489		2.05201	3.09008			1.90125	0.0129342		1.90458	-0.313595		1.90458	0.00388175		1.90125	-0.452027
	2.05921	3.02886		2.05921	3.07185		2.05921	3.0466		2.05921	3.09073			1.90792	0.0133738		1.91125	-0.3132		1.91125	0.00362098		1.90792	-0.45339
	2.06641	3.02738		2.06641	3.07272		2.06641	3.04849		2.06641	3.09125			1.91458	0.0133142		1.91792	-0.312559		1.91792	0.00309199		1.91458	-0.454731
	2.07361	3.02644		2.07361	3.07316		2.07361	3.05017		2.07361	3.09159			1.92125	0.0126958		1.92458	-0.311993		1.92458	0.00263751		1.92125	-0.455424
	2.08081	3.02613		2.08081	3.07299		2.08081	3.05136		2.08081	3.09166			1.92792	0.0120252		1.93125	-0.311732		1.93125	0.00268966		1.92792	-0.455797
	2.08801	3.02643		2.08801	3.07205		2.08801	3.05173		2.08801	3.09141			1.93458	0.011608		1.93792	-0.311889		1.93792	0.00295788		1.93458	-0.45605
	2.09521	3.02727		2.09521	3.07029		2.09521	3.05099		2.09521	3.09089			1.94125	0.0116527		1.94458	-0.312269		1.94458	0.00300258		1.94125	-0.456683
	2.10241	3.02842		2.10241	3.06785		2.10241	3.049		2.10241	3.09023			1.94792	0.0117123		1.95125	-0.312731		1.95125	0.00284612		1.94792	-0.457473
	2.10961	3.02964		2.10961	3.06507		2.10961	3.04595		2.10961	3.08962			1.95458	0.0114366		1.95792	-0.313282		1.95792	0.00287592		1.95458	-0.45836
	2.11681	3.03069		2.11681	3.06242		2.11681	3.0423		2.11681	3.08924			1.96125	0.0113398		1.96458	-0.314146		1.96458	0.00279397		1.96125	-0.459284
	2.12401	3.03147		2.12401	3.06032		2.12401	3.03859		2.12401	3.08923			1.96792	0.0115484		1.97125	-0.315197		1.97125	0.002563		1.96792	-0.459984
	2.13121	3.03194		2.13121	3.05907		2.13121	3.03521		2.13121	3.08969			1.97458	0.0116453		1.97792	-0.316337		1.97792	0.00239164		1.97458	-0.460483
	2.13841	3.03213		2.13841	3.0588		2.13841	3.03242		2.13841	3.09068			1.98125	0.0113398		1.98458	-0.317477		1.98458	0.00261515		1.98125	-0.460841
	2.14561	3.03212		2.14561	3.05955		2.14561	3.03034		2.14561	3.09215			1.98792	0.0108108		1.99125	-0.318512		1.99125	0.0031963		1.98792	-0.461273
	2.15281	3.032		2.15281	3.06116		2.15281	3.02904		2.15281	3.09398			1.99458	0.0109747		1.99792	-0.319146		1.99792	0.0037998		1.99458	-0.461951
	2.16001	3.03189		2.16001	3.06334		2.16001	3.02839		2.16001	3.09592			2.00125	0.0113025		2.00458	-0.319257		2.00458	0.00442564		2.00125	-0.463255
	2.16721	3.03185		2.16721	3.06566		2.16721	3.02806		2.16721	3.09775			2.00792	0.0110939		2.01125	-0.31922		2.01125	0.00461191		2.00792	-0.464961
	2.17441	3.03193		2.17441	3.06768		2.17441	3.02766		2.17441	3.0992			2.01458	0.0103563		2.01792	-0.31925		2.01792	0.00412017		2.01458	-0.4666
	2.18161	3.03218		2.18161	3.06905		2.18161	3.0269		2.18161	3.10004			2.02125	0.00946224		2.02458	-0.319563		2.02458	0.00324845		2.02125	-0.467576
	2.18881	3.03258		2.18881	3.06957		2.18881	3.02574		2.18881	3.1002			2.02792	0.00890344		2.03125	-0.320517		2.03125	0.00257045		2.02792	-0.468247
	2.19601	3.03308		2.19601	3.06917		2.19601	3.02431		2.19601	3.0997			2.03458	0.00831485		2.03792	-0.322089		2.03792	0.00246614		2.03458	-0.468969
	2.20321	3.03351		2.20321	3.0679		2.20321	3.02282		2.20321	3.09873			2.04125	0.0077486		2.04458	-0.323921		2.04458	0.00264496		2.04125	-0.469342
	2.21041	3.03375		2.21041	3.0659		2.21041	3.02147		2.21041	3.09755			2.04792	0.00748038		2.05125	-0.325568		2.05125	0.00331551		2.04792	-0.469476
	2.21761	3.03377		2.21761	3.06337		2.21761	3.02054		2.21761	3.09647			2.05458	0.00774115		2.05792	-0.326976		2.05792	0.00463426		2.05458	-0.469878
	2.22481	3.03366		2.22481	3.06066		2.22481	3.02035		2.22481	3.09572			2.06125	0.00831485		2.06458	-0.328146		2.06458	0.00582635		2.06125	-0.471391
	2.23201	3.03355		2.23201	3.05806		2.23201	3.0212		2.23201	3.0955			2.06792	0.00900775		2.07125	-0.328638		2.07125	0.00615418		2.06792	-0.473335
	2.23921	3.03358		2.23921	3.05588		2.23921	3.02318		2.23921	3.09587			2.07458	0.00979751		2.07792	-0.328593		2.07792	0.00550598		2.07458	-0.4749
	2.24641	3.03379		2.24641	3.05434		2.24641	3.02613		2.24641	3.09676			2.08125	0.0108108		2.08458	-0.328183		2.08458	0.00464171		2.08125	-0.476085
	2.25361	3.03426		2.25361	3.05358		2.25361	3.02968		2.25361	3.0979			2.08792	0.0120699		2.09125	-0.327796		2.09125	0.00388175		2.08792	-0.477448
	2.26081	3.03509		2.26081	3.05359		2.26081	3.03341		2.26081	3.09891			2.09458	0.0131577		2.09792	-0.327431		2.09792	0.0031814		2.09458	-0.478849
	2.26801	3.03633		2.26801	3.05423		2.26801	3.03696		2.26801	3.09935			2.10125	0.0141039		2.10458	-0.32749		2.10458	0.00269711		2.10125	-0.479959
	2.27521	3.03788		2.27521	3.05524		2.27521	3.04004		2.27521	3.09896			2.10792	0.0148341		2.11125	-0.328206		2.11125	0.0025779		2.10792	-0.4806
	2.28241	3.03946		2.28241	3.0564		2.28241	3.04236		2.28241	3.09768			2.11458	0.0153556		2.11792	-0.329584		2.11792	0.00273436		2.11458	-0.481181
	2.28961	3.04072		2.28961	3.05754		2.28961	3.04369		2.28961	3.09565			2.12125	0.0155419		2.12458	-0.331081		2.12458	0.00312179		2.12125	-0.482045
	2.29681	3.04135		2.29681	3.0586		2.29681	3.0439		2.29681	3.09318			2.12792	0.0151172		2.13125	-0.332437		2.13125	0.00338256		2.12792	-0.483088
	2.30401	3.04116		2.30401	3.05955		2.30401	3.04312		2.30401	3.09064			2.13458	0.0142008		2.13792	-0.333928		2.13792	0.00334531		2.13458	-0.484362
	2.31121	3.04019		2.31121	3.06034		2.31121	3.04168		2.31121	3.08837			2.14125	0.0131056		2.14458	-0.335313		2.14458	0.00312179		2.14125	-0.485227
	2.31841	3.03862		2.31841	3.06098		2.31841	3.04011		2.31841	3.08669			2.14792	0.0124127		2.15125	-0.336334		2.15125	0.00308454		2.14792	-0.48577
	2.32561	3.03673		2.32561	3.0615		2.32561	3.0389		2.32561	3.08583			2.15458	0.011988		2.15792	-0.336871		2.15792	0.00349432		2.15458	-0.486165
	2.33281	3.0348		2.33281	3.06197		2.33281	3.03847		2.33281	3.08591			2.16125	0.0114515		2.16458	-0.337362		2.16458	0.00406802		2.16125	-0.486538
	2.34001	3.03315		2.34001	3.06241		2.34001	3.03907		2.34001	3.08682			2.16792	0.0108629		2.17125	-0.337996		2.17125	0.00463426		2.16792	-0.487067
	2.34722	3.03206		2.34722	3.06268		2.34722	3.04075		2.34722	3.08822			2.17458	0.010699		2.17792	-0.3381		2.17792	0.00494719		2.17458	-0.487797
	2.35442	3.03177		2.35442	3.06267		2.35442	3.04336		2.35442	3.08968			2.18125	0.0110418		2.18458	-0.33766		2.18458	0.00486523		2.18125	-0.488676
	2.36162	3.03232		2.36162	3.06229		2.36162	3.04654		2.36162	3.09087			2.18792	0.0111312		2.19125	-0.337005		2.19125	0.00469387		2.18792	-0.489376
	2.36882	3.03362		2.36882	3.06159		2.36882	3.04978		2.36882	3.09159			2.19458	0.0110418		2.19792	-0.336505		2.19792	0.00462681		2.19458	-0.48963
	2.37602	3.03543		2.37602	3.06063		2.37602	3.05244		2.37602	3.09182			2.20125	0.0111684		2.20458	-0.336699		2.20458	0.0045225		2.20125	-0.489816
	2.38322	3.03746		2.38322	3.05955		2.38322	3.05397		2.38322	3.09158			2.20792	0.0117198		2.21125	-0.337526		2.21125	0.00421703		2.20792	-0.489913
	2.39042	3.03957		2.39042	3.05843		2.39042	3.054		2.39042	3.09101			2.21458	0.0120699		2.21792	-0.339009		2.21792	0.00406802		2.21458	-0.489973
	2.39762	3.0417		2.39762	3.05741		2.39762	3.05251		2.39762	3.09036			2.22125	0.0117272		2.22458	-0.340551		2.22458	0.0044629		2.22125	-0.490375
	2.40482	3.04385		2.40482	3.05656		2.40482	3.04975		2.40482	3.08995			2.22792	0.0113621		2.23125	-0.341788		2.23125	0.005126		2.22792	-0.491627
	2.41202	3.04593		2.41202	3.05592		2.41202	3.04611		2.41202	3.09013			2.23458	0.0111312		2.23792	-0.342593		2.23792	0.00549108		2.23458	-0.493854
	2.41922	3.04777		2.41922	3.05554		2.41922	3.04204		2.41922	3.09109			2.24125	0.0113174		2.24458	-0.342615		2.24458	0.00535697		2.24125	-0.496201
	2.42642	3.04915		2.42642	3.05557		2.42642	3.038		2.42642	3.09286			2.24792	0.0114664		2.25125	-0.341967		2.25125	0.00485778		2.24792	-0.498064
	2.43362	3.04993		2.43362	3.05625		2.43362	3.03441		2.43362	3.09531			2.25458	0.011608		2.25792	-0.341028		2.25792	0.00435859		2.25458	-0.499167
	2.44082	3.05011		2.44082	3.05774		2.44082	3.03168		2.44082	3.09822			2.26125	0.0116155		2.26458	-0.340402		2.26458	0.00405312		2.26125	-0.499673
	2.44802	3.0497		2.44802	3.0601		2.44802	3.03013		2.44802	3.10127			2.26792	0.0111014		2.27125	-0.3407		2.27125	0.00336021		2.26792	-0.500016
	2.45522	3.04875		2.45522	3.06321		2.45522	3.02988		2.45522	3.10404			2.27458	0.0106022		2.27792	-0.341661		2.27792	0.00221282		2.27458	-0.500068
	2.46242	3.04734		2.46242	3.06689		2.46242	3.03082		2.46242	3.10615			2.28125	0.0102818		2.28458	-0.342794		2.28458	0.00113249		2.28125	-0.500217
	2.46962	3.04562		2.46962	3.07089		2.46962	3.03271		2.46962	3.10727			2.28792	0.0104457		2.29125	-0.343509		2.29125	0.00064075		2.28792	-0.500515
	2.47682	3.04386		2.47682	3.07492		2.47682	3.03524		2.47682	3.10726			2.29458	0.0106618		2.29792	-0.343964		2.29792	0.000521541		2.29458	-0.501171
	2.48402	3.04232		2.48402	3.07857		2.48402	3.03808		2.48402	3.10614			2.30125	0.0108257		2.30458	-0.344522		2.30458	-2.23517e-05		2.30125	-0.502318
	2.49122	3.04115		2.49122	3.08138		2.49122	3.04085		2.49122	3.10409			2.30792	0.0109971		2.31125	-0.344805		2.31125	-0.000663102		2.30792	-0.503637
	2.49842	3.04037		2.49842	3.083		2.49842	3.04313		2.49842	3.10141			2.31458	0.0110418		2.31792	-0.344977		2.31792	-0.000789762		2.31458	-0.504956
	2.50562	3.03986		2.50562	3.0834		2.50562	3.04451		2.50562	3.09849			2.32125	0.0108704		2.32458	-0.345275		2.32458	-0.000171363		2.32125	-0.505939
	2.51282	3.0395		2.51282	3.08291		2.51282	3.04478		2.51282	3.09584			2.32792	0.0107735		2.33125	-0.345938		2.33125	0.00090152		2.32792	-0.50658
	2.52002	3.03923		2.52002	3.08207		2.52002	3.04397		2.52002	3.09384			2.33458	0.0110939		2.33792	-0.346899		2.33792	0.00198931		2.33458	-0.507176
	2.52722	3.03913		2.52722	3.08133		2.52722	3.0423		2.52722	3.09273			2.34125	0.0118837		2.34458	-0.347614		2.34458	0.00310689		2.34125	-0.507623
	2.53442	3.03925		2.53442	3.08097		2.53442	3.04011		2.53442	3.09252			2.34792	0.0130758		2.35125	-0.348158		2.35125	0.00410527		2.34792	-0.507861
	2.54162	3.03969		2.54162	3.08107		2.54162	3.03769		2.54162	3.09302			2.35458	0.014171		2.35792	-0.348531		2.35792	0.00483543		2.35458	-0.508025
	2.54882	3.04056		2.54882	3.08165		2.54882	3.03535		2.54882	3.09393			2.36125	0.0150725		2.36458	-0.348672		2.36458	0.00520796		2.36125	-0.508361
	2.55602	3.04195		2.55602	3.08267		2.55602	3.03337		2.55602	3.09489			2.36792	0.0153854		2.37125	-0.348829		2.37125	0.00510365		2.36792	-0.509053
	2.56322	3.04378		2.56322	3.08397		2.56322	3.03192		2.56322	3.09554			2.37458	0.0151396		2.37792	-0.34865		2.37792	0.00464916		2.37458	-0.510015
	2.57042	3.04586		2.57042	3.0852		2.57042	3.03106		2.57042	3.09553			2.38125	0.0146553		2.38458	-0.348218		2.38458	0.00450015		2.38125	-0.511363
	2.57762	3.04782		2.57762	3.08588		2.57762	3.03072		2.57762	3.09464			2.38792	0.0142902		2.39125	-0.34789		2.39125	0.00489503		2.38792	-0.513084
	2.58482	3.04931		2.58482	3.08569		2.58482	3.03077		2.58482	3.09281			2.39458	0.0140294		2.39792	-0.347793		2.39792	0.00531226		2.39458	-0.51485
	2.59202	3.05004		2.59202	3.08467		2.59202	3.03111		2.59202	3.09027			2.40125	0.0136495		2.40458	-0.348307		2.40458	0.00526011		2.40125	-0.51634
	2.59922	3.04986		2.59922	3.08309		2.59922	3.03167		2.59922	3.08737			2.40792	0.0129789		2.41125	-0.349022		2.41125	0.00527501		2.40792	-0.517383
	2.60642	3.04877		2.60642	3.08126		2.60642	3.03235		2.60642	3.08443			2.41458	0.0125915		2.41792	-0.349768		2.41792	0.00551343		2.41458	-0.518285
	2.61362	3.04689		2.61362	3.07931		2.61362	3.03303		2.61362	3.08172			2.42125	0.0123829		2.42458	-0.350617		2.42458	0.00555068		2.42125	-0.518873
	2.62082	3.0445		2.62082	3.07724		2.62082	3.03359		2.62082	3.07937			2.42792	0.0117049		2.43125	-0.351243		2.43125	0.00526011		2.42792	-0.51906
	2.62802	3.04196		2.62802	3.07504		2.62802	3.0339		2.62802	3.07745			2.43458	0.0107586		2.43792	-0.35163		2.43792	0.00513345		2.43458	-0.519097
	2.63522	3.03959		2.63522	3.0728		2.63522	3.03389		2.63522	3.07607			2.44125	0.0096634		2.44458	-0.351764		2.44458	0.00528246		2.44125	-0.519253
	2.64242	3.03757		2.64242	3.07064		2.64242	3.03348		2.64242	3.07528			2.44792	0.009045		2.45125	-0.352181		2.45125	0.00531971		2.44792	-0.520147
	2.64962	3.03598		2.64962	3.0686		2.64962	3.03273		2.64962	3.07508			2.45458	0.00870973		2.45792	-0.353202		2.45792	0.00534207		2.45458	-0.521302
	2.65682	3.03479		2.65682	3.06659		2.65682	3.03184		2.65682	3.07548			2.46125	0.00866503		2.46458	-0.354432		2.46458	0.00545382		2.46125	-0.522442
	2.66402	3.03389		2.66402	3.06462		2.66402	3.03112		2.66402	3.07646			2.46792	0.00925362		2.47125	-0.355422		2.47125	0.00564754		2.46792	-0.523299
	2.67122	3.03314		2.67122	3.06283		2.67122	3.03092		2.67122	3.07807			2.47458	0.0100434		2.47792	-0.356197		2.47792	0.00546873		2.47458	-0.524066
	2.67842	3.0324		2.67842	3.06153		2.67842	3.0315		2.67842	3.08037			2.48125	0.0111237		2.48458	-0.356957		2.48458	0.00499934		2.48125	-0.525065
	2.68562	3.03159		2.68562	3.061		2.68562	3.03302		2.68562	3.08334			2.48792	0.0123084		2.49125	-0.357628		2.49125	0.0044331		2.48792	-0.526026
	2.69282	3.03062		2.69282	3.06134		2.69282	3.03544		2.69282	3.08679			2.49458	0.0132918		2.49792	-0.357978		2.49792	0.00398606		2.49458	-0.527032
	2.70002	3.02947		2.70002	3.06241		2.70002	3.03863		2.70002	3.09043			2.50125	0.0139847		2.50458	-0.357889		2.50458	0.00368059		2.50125	-0.528477
	2.70722	3.02822		2.70722	3.06402		2.70722	3.04232		2.70722	3.09387			2.50792	0.0144616		2.51125	-0.357948		2.51125	0.00354648		2.50792	-0.530206
	2.71442	3.02706		2.71442	3.06591		2.71442	3.04617		2.71442	3.09675			2.51458	0.0151247		2.51792	-0.358552		2.51792	0.00364333		2.51458	-0.531755
	2.72162	3.02628		2.72162	3.06782		2.72162	3.04981		2.72162	3.09883			2.52125	0.015676		2.52458	-0.359535		2.52458	0.00376254		2.52125	-0.532635
	2.72882	3.02614		2.72882	3.06943		2.72882	3.05295		2.72882	3.10004			2.52792	0.0159144		2.53125	-0.360407		2.53125	0.00365824		2.52792	-0.533298
	2.73602	3.02684		2.73602	3.07043		2.73602	3.0554		2.73602	3.10042			2.53458	0.0158325		2.53792	-0.361189		2.53792	0.00334531		2.53458	-0.533983
	2.74322	3.02845		2.74322	3.0706		2.74322	3.0571		2.74322	3.10011			2.54125	0.0155568		2.54458	-0.36221		2.54458	0.00276417		2.54125	-0.534482
	2.75042	3.03096		2.75042	3.06997		2.75042	3.05816		2.75042	3.09933			2.54792	0.014998		2.55125	-0.363104		2.55125	0.0018999		2.54792	-0.534661
	2.75762	3.03419		2.75762	3.06878		2.75762	3.05867		2.75762	3.09839			2.55458	0.0143275		2.55792	-0.363462		2.55792	0.00107288		2.55458	-0.534683
	2.76482	3.03786		2.76482	3.06734		2.76482	3.05868		2.76482	3.09758			2.56125	0.0137687		2.56458	-0.363253		2.56458	0.00102073		2.56125	-0.53516
	2.77202	3.04157		2.77202	3.06587		2.77202	3.05823		2.77202	3.09721			2.56792	0.013575		2.57125	-0.363134		2.57125	0.00181794		2.56792	-0.535958
	2.77922	3.04486		2.77922	3.06451		2.77922	3.05738		2.77922	3.09738			2.57458	0.0135154		2.57792	-0.362925		2.57792	0.00267476		2.57458	-0.53671
	2.78642	3.04732		2.78642	3.06334		2.78642	3.05626		2.78642	3.09805			2.58125	0.0132322		2.58458	-0.362761		2.58458	0.00321865		2.58125	-0.536993
	2.79362	3.04872		2.79362	3.06243		2.79362	3.05504		2.79362	3.09911			2.58792	0.0127479		2.59125	-0.363037		2.59125	0.00347942		2.58792	-0.5375
	2.80082	3.04899		2.80082	3.06179		2.80082	3.05378		2.80082	3.10043			2.59458	0.0120103		2.59792	-0.363834		2.59792	0.0038147		2.59458	-0.538744
	2.80802	3.04829		2.80802	3.06128		2.80802	3.05248		2.80802	3.10192			2.60125	0.0114962		2.60458	-0.364587		2.60458	0.00391155		2.60125	-0.540383
	2.81522	3.04695		2.81522	3.0607		2.81522	3.05105		2.81522	3.1035			2.60792	0.0111088		2.61125	-0.364475		2.61125	0.00361353		2.60792	-0.541672
	2.82242	3.04532		2.82242	3.05987		2.82242	3.04948		2.82242	3.10509			2.61458	0.0109226		2.61792	-0.364289		2.61792	0.00308454		2.61458	-0.542685
	2.82962	3.04375		2.82962	3.05873		2.82962	3.04781		2.82962	3.1066			2.62125	0.0111461		2.62458	-0.36405		2.62458	0.00274181		2.62125	-0.543952
	2.83682	3.04247		2.83682	3.05732		2.83682	3.04608		2.83682	3.10801			2.62792	0.0119582		2.63125	-0.36373		2.63125	0.00258535		2.62792	-0.545315
	2.84402	3.04168		2.84402	3.05578		2.84402	3.0443		2.84402	3.10931			2.63458	0.013046		2.63792	-0.363111		2.63792	0.00237674		2.63458	-0.546195
	2.85122	3.04149		2.85122	3.05412		2.85122	3.04248		2.85122	3.11046			2.64125	0.0136495		2.64458	-0.362851		2.64458	0.001885		2.64125	-0.546373
	2.85842	3.04198		2.85842	3.05238		2.85842	3.04071		2.85842	3.11134			2.64792	0.0132918		2.65125	-0.363484		2.65125	0.00157952		2.64792	-0.546411
	2.86562	3.04305		2.86562	3.05066		2.86562	3.03921		2.86562	3.11177			2.65458	0.0127479		2.65792	-0.364371		2.65792	0.00179559		2.65458	-0.546537
	2.87282	3.04444		2.87282	3.04908		2.87282	3.03823		2.87282	3.11165			2.66125	0.0123978		2.66458	-0.365227		2.66458	0.00228733		2.66125	-0.546835
	2.88002	3.04589		2.88002	3.04782		2.88002	3.03793		2.88002	3.11101			2.66792	0.0123307		2.67125	-0.366032		2.67125	0.00306964		2.66792	-0.547037
	2.88722	3.04714		2.88722	3.04703		2.88722	3.03828		2.88722	3.10996			2.67458	0.0123829		2.67792	-0.366971		2.67792	0.00391155		2.67458	-0.547305
	2.89442	3.04804		2.89442	3.04675		2.89442	3.03909		2.89442	3.10867			2.68125	0.0121593		2.68458	-0.367828		2.68458	0.00491738		2.68125	-0.547945
	2.90162	3.04847		2.90162	3.04701		2.90162	3.04005		2.90162	3.10729			2.68792	0.0123382		2.69125	-0.368178		2.69125	0.00558794		2.68792	-0.548862
	2.90882	3.04823		2.90882	3.04787		2.90882	3.04086		2.90882	3.10599			2.69458	0.0127554		2.69792	-0.368424		2.69792	0.00582635		2.69458	-0.549853
	2.91602	3.04719		2.91602	3.04937		2.91602	3.04125		2.91602	3.10496			2.70125	0.0132918		2.70458	-0.369132		2.70458	0.00619143		2.70125	-0.550635
	2.92322	3.04532		2.92322	3.05153		2.92322	3.04101		2.92322	3.10436			2.70792	0.0134856		2.71125	-0.370361		2.71125	0.00657141		2.70792	-0.551805
	2.93042	3.04277		2.93042	3.05431		2.93042	3.04		2.93042	3.10425			2.71458	0.0130758		2.71792	-0.371754		2.71792	0.00693649		2.71458	-0.55363
	2.93762	3.0398		2.93762	3.0576		2.93762	3.03825		2.93762	3.10451			2.72125	0.0128448		2.72458	-0.373125		2.72458	0.00700355		2.72125	-0.555485
	2.94482	3.03666		2.94482	3.06123		2.94482	3.03589		2.94482	3.10489			2.72792	0.0127628		2.73125	-0.3746		2.73125	0.00698119		2.72792	-0.556678
	2.95202	3.0335		2.95202	3.06497		2.95202	3.03323		2.95202	3.10513			2.73458	0.0126436		2.73792	-0.375934		2.73792	0.00691414		2.73458	-0.557326
	2.95922	3.03046		2.95922	3.06857		2.95922	3.03066		2.95922	3.10506			2.74125	0.0123233		2.74458	-0.376642		2.74458	0.00665337		2.74125	-0.558294
	2.96642	3.02771		2.96642	3.07177		2.96642	3.02857		2.96642	3.10468			2.74792	0.012055		2.75125	-0.376552		2.75125	0.00625849		2.74792	-0.559419
	2.97362	3.02544		2.97362	3.07431		2.97362	3.02725		2.97362	3.104			2.75458	0.0122711		2.75792	-0.376008		2.75792	0.00588596		2.75458	-0.559948
	2.98082	3.02383		2.98082	3.07599		2.98082	3.02691		2.98082	3.10308			2.76125	0.0127181		2.76458	-0.375204		2.76458	0.0057891		2.76125	-0.559792
	2.98802	3.02288		2.98802	3.07668		2.98802	3.02774		2.98802	3.10198			2.76792	0.0127256		2.77125	-0.374198		2.77125	0.00585616		2.76792	-0.559345
	2.99522	3.0225		2.99522	3.07634		2.99522	3.02982		2.99522	3.10078			2.77458	0.0125021		2.77792	-0.373214		2.77792	0.005804		2.77458	-0.558868
	3.00242	3.02256		3.00242	3.07513		3.00242	3.03318		3.00242	3.09965			2.78125	0.0122711		2.78458	-0.372477		2.78458	0.0057295		2.78125	-0.558078
	3.00962	3.02298		3.00962	3.0734		3.00962	3.03763		3.00962	3.09874			2.78792	0.0122264		2.79125	-0.37244		2.79125	0.00607967		2.78792	-0.557348
	3.01682	3.02374		3.01682	3.07159		3.01682	3.04276		3.01682	3.09821			2.79458	0.0125468		2.79792	-0.372738		2.79792	0.00665337		2.79458	-0.557229
	3.02402	3.02474		3.02402	3.0701		3.02402	3.04807		3.02402	3.09814			2.80125	0.0133067		2.80458	-0.373475		2.80458	0.00715256		2.80125	-0.557721
	3.03122	3.0259		3.03122	3.06917		3.03122	3.053		3.03122	3.09855			2.80792	0.0146478		2.81125	-0.374399		2.81125	0.00755489		2.80792	-0.558876
	3.03842	3.02711		3.03842	3.06891		3.03842	3.05706		3.03842	3.09951			2.81458	0.0158027		2.81792	-0.375174		2.81792	0.00831485		2.81458	-0.560291
	3.04562	3.02837		3.04562	3.06929		3.04562	3.05985		3.04562	3.10103			2.82125	0.0163317		2.82458	-0.375763		2.82458	0.00903755		2.82125	-0.561662
	3.05282	3.02973		3.05282	3.07015		3.05282	3.0611		3.05282	3.10314			2.82792	0.0163168		2.83125	-0.376217		2.83125	0.00910461		2.82792	-0.562549
	3.06002	3.03118		3.06002	3.07117		3.06002	3.06079		3.06002	3.1058			2.83458	0.015676		2.83792	-0.377104		2.83792	0.0083521		2.83458	-0.563048
	3.06722	3.03272		3.06722	3.07198		3.06722	3.05915		3.06722	3.10879			2.84125	0.014022		2.84458	-0.378013		2.84458	0.00730902		2.84125	-0.56351
	3.07442	3.03432		3.07442	3.07226		3.07442	3.05654		3.07442	3.11185			2.84792	0.0119507		2.85125	-0.378869		2.85125	0.00634789		2.84792	-0.563785
	3.08162	3.03599		3.08162	3.07188		3.08162	3.05343		3.08162	3.11466			2.85458	0.0101328		2.85792	-0.379644		2.85792	0.00546128		2.85458	-0.564002
	3.08882	3.0377		3.08882	3.07092		3.08882	3.0503		3.08882	3.11698			2.86125	0.00920147		2.86458	-0.380218		2.86458	0.00458956		2.86125	-0.564314
	3.09602	3.03934		3.09602	3.06957		3.09602	3.0475		3.09602	3.11863			2.86792	0.00914186		2.87125	-0.380367		2.87125	0.00386685		2.86792	-0.564806
	3.10322	3.04072		3.10322	3.06803		3.10322	3.04533		3.10322	3.11949			2.87458	0.00973791		2.87792	-0.379972		2.87792	0.00380725		2.87458	-0.565618
	3.11042	3.04173		3.11042	3.06646		3.11042	3.04396		3.11042	3.11946			2.88125	0.0111237		2.88458	-0.379682		2.88458	0.00426918		2.88125	-0.566892
	3.11762	3.04231		3.11762	3.06498		3.11762	3.04335		3.11762	3.11849			2.88792	0.0123233		2.89125	-0.379726		2.89125	0.00482053		2.88792	-0.568569
	3.12482	3.0425		3.12482	3.06371		3.12482	3.04336		3.12482	3.1166			2.89458	0.0130162		2.89792	-0.380144		2.89792	0.00513345		2.89458	-0.570111
	3.13202	3.04233		3.13202	3.06266		3.13202	3.04376		3.13202	3.11382			2.90125	0.0132173		2.90458	-0.380687		2.90458	0.00537187		2.90125	-0.571422
	3.13922	3.04186		3.13922	3.06174		3.13922	3.04433		3.13922	3.1103			2.90792	0.0130609		2.91125	-0.381328		2.91125	0.00560284		2.90792	-0.572689
	3.14642	3.04123		3.14642	3.06079		3.14642	3.04484		3.14642	3.10618			2.91458	0.0129044		2.91792	-0.382058		2.91792	0.00555813		2.91458	-0.573955
	3.15362	3.04067		3.15362	3.05968		3.15362	3.04505		3.15362	3.10173			2.92125	0.0127032		2.92458	-0.38255		2.92458	0.00552088		2.92125	-0.574686
	3.16082	3.04042		3.16082	3.05834		3.16082	3.04477		3.16082	3.09728			2.92792	0.0129044		2.93125	-0.382736		2.93125	0.00579655		2.92792	-0.575095
	3.16802	3.04062		3.16802	3.05676		3.16802	3.04382		3.16802	3.09328			2.93458	0.0136048		2.93792	-0.382736		2.93792	0.00627339		2.93458	-0.575706
	3.17522	3.04129		3.17522	3.05498		3.17522	3.0422		3.17522	3.0901			2.94125	0.0142902		2.94458	-0.383191		2.94458	0.00657141		2.94125	-0.576898
	3.18242	3.04233		3.18242	3.05302		3.18242	3.04001		3.18242	3.08802			2.94792	0.0149235		2.95125	-0.383884		2.95125	0.00654906		2.94792	-0.578433
	3.18962	3.04366		3.18962	3.05097		3.18962	3.03746		3.18962	3.08719			2.95458	0.0152588		2.95792	-0.384502		2.95792	0.0064671		2.95458	-0.579633
	3.19682	3.04518		3.19682	3.04903		3.19682	3.03483		3.19682	3.08756			2.96125	0.0153705		2.96458	-0.384808		2.96458	0.00630319		2.96125	-0.580758
	3.20402	3.04674		3.20402	3.04745		3.20402	3.03235		3.20402	3.08894			2.96792	0.0149161		2.97125	-0.384755		2.97125	0.0058338		2.96792	-0.581793
	3.21122	3.04818		3.21122	3.04649		3.21122	3.03028		3.21122	3.09094			2.97458	0.0136122		2.97792	-0.3848		2.97792	0.00539422		2.97458	-0.58274
	3.21842	3.04934		3.21842	3.04636		3.21842	3.02882		3.21842	3.09308			2.98125	0.0121891		2.98458	-0.384971		2.98458	0.00519305		2.98125	-0.582822
	3.22562	3.05016		3.22562	3.04712		3.22562	3.02809		3.22562	3.09489			2.98792	0.0109226		2.99125	-0.385426		2.99125	0.00537932		2.98792	-0.58233
	3.23282	3.0506		3.23282	3.04873		3.23282	3.02812		3.23282	3.09606			2.99458	0.00981987		2.99792	-0.385545		2.99792	0.00563264		2.99458	-0.58195
	3.24002	3.05064		3.24002	3.05098		3.24002	3.02876		3.24002	3.0965			3.00125	0.00889599		3.00458	-0.385374		3.00458	0.00584126		3.00125	-0.582352
	3.24722	3.05024		3.24722	3.05352		3.24722	3.02978		3.24722	3.09628			3.00792	0.00862777		3.01125	-0.385582		3.01125	0.00621378		3.00792	-0.583395
	3.25442	3.04941		3.25442	3.05591		3.25442	3.03088		3.25442	3.09556			3.01458	0.00939518		3.01792	-0.386156		3.01792	0.00650436		3.01458	-0.584781
	3.26162	3.0482		3.26162	3.05776		3.26162	3.03181		3.26162	3.09461			3.02125	0.0103042		3.02458	-0.386633		3.02458	0.00670552		3.02125	-0.586681
	3.26882	3.04668		3.26882	3.05875		3.26882	3.03237		3.26882	3.09377			3.02792	0.0106618		3.03125	-0.386789		3.03125	0.00672787		3.02792	-0.5887
	3.27602	3.04489		3.27602	3.05879		3.27602	3.03248		3.27602	3.09333			3.03458	0.0108704		3.03792	-0.387385		3.03792	0.00661612		3.03458	-0.590414
	3.28322	3.04285		3.28322	3.05801		3.28322	3.03217		3.28322	3.09351			3.04125	0.0110865		3.04458	-0.388555		3.04458	0.00629574		3.04125	-0.591181
	3.29042	3.04065		3.29042	3.05679		3.29042	3.03158		3.29042	3.09442			3.04792	0.0111982		3.05125	-0.389695		3.05125	0.00586361		3.04792	-0.5913
	3.29762	3.03839		3.29762	3.05566		3.29762	3.03091		3.29762	3.096			3.05458	0.0109822		3.05792	-0.390194		3.05792	0.00554323		3.05458	-0.591174
	3.30482	3.03616		3.30482	3.05506		3.30482	3.03037		3.30482	3.09811			3.06125	0.0106692		3.06458	-0.390396		3.06458	0.00551343		3.06125	-0.590704
	3.31202	3.03394		3.31202	3.05526		3.31202	3.03013		3.31202	3.10044			3.06792	0.0106022		3.07125	-0.390649		3.07125	0.00555813		3.06792	-0.589781
	3.31922	3.03169		3.31922	3.05623		3.31922	3.03028		3.31922	3.10254			3.07458	0.0104681		3.07792	-0.39079		3.07792	0.0057891		3.07458	-0.588663
	3.32642	3.02942		3.32642	3.05776		3.32642	3.03079		3.32642	3.10403			3.08125	0.0104904		3.08458	-0.390895		3.08458	0.00618398		3.08125	-0.588067
	3.33362	3.02726		3.33362	3.05947		3.33362	3.03151		3.33362	3.10463			3.08792	0.0103414		3.09125	-0.391014		3.09125	0.0064373		3.08792	-0.588179
	3.34082	3.02539		3.34082	3.06092		3.34082	3.03219		3.34082	3.10422			3.09458	0.00987947		3.09792	-0.391349		3.09792	0.00631064		3.09458	-0.588819
	3.34802	3.02399		3.34802	3.06168		3.34802	3.03257		3.34802	3.10282			3.10125	0.00920892		3.10458	-0.391722		3.10458	0.00584871		3.10125	-0.590131
	3.35522	3.02318		3.35522	3.06147		3.35522	3.0325		3.35522	3.10054			3.10792	0.00867993		3.11125	-0.392012		3.11125	0.00588596		3.10792	-0.591919
	3.36242	3.02311		3.36242	3.06029		3.36242	3.03194		3.36242	3.09767			3.11458	0.00841916		3.11792	-0.392243		3.11792	0.00631064		3.11458	-0.593744
	3.36962	3.02393		3.36962	3.05843		3.36962	3.03101		3.36962	3.09463			3.12125	0.00816584		3.12458	-0.392355		3.12458	0.00680238		3.12125	-0.595279
	3.37682	3.02568		3.37682	3.05634		3.37682	3.02995		3.37682	3.09191			3.12792	0.00825524		3.13125	-0.39281		3.13125	0.00682473		3.12792	-0.596784
	3.38402	3.02821		3.38402	3.05449		3.38402	3.02899		3.38402	3.08989			3.13458	0.0090301		3.13792	-0.393763		3.13792	0.00654906		3.13458	-0.598423
	3.39122	3.03119		3.39122	3.05322		3.39122	3.02839		3.39122	3.08861			3.14125	0.0104234		3.14458	-0.395067		3.14458	0.00645965		3.14125	-0.59969
	3.39842	3.03428		3.39842	3.05273		3.39842	3.02829		3.39842	3.08794			3.14792	0.0117496		3.15125	-0.395998		3.15125	0.00592321		3.14792	-0.600524
	3.40562	3.03724		3.40562	3.05309		3.40562	3.02877		3.40562	3.0877			3.15458	0.0125691		3.15792	-0.396714		3.15792	0.00476092		3.15458	-0.601575
	3.41282	3.03996		3.41282	3.05426		3.41282	3.02984		3.41282	3.08774			3.16125	0.0127256		3.16458	-0.397623		3.16458	0.00337511		3.16125	-0.602528
	3.42002	3.04237		3.42002	3.05605		3.42002	3.03137		3.42002	3.08793			3.16792	0.012517		3.17125	-0.398383		3.17125	0.00283867		3.16792	-0.60267
	3.42722	3.04446		3.42722	3.05823		3.42722	3.03314		3.42722	3.08815			3.17458	0.0123903		3.17792	-0.398628		3.17792	0.00308454		3.17458	-0.601836
	3.43442	3.04627		3.43442	3.06054		3.43442	3.03495		3.43442	3.08827			3.18125	0.0123978		3.18458	-0.398353		3.18458	0.0031516		3.18125	-0.600979
	3.44162	3.04789		3.44162	3.06277		3.44162	3.03661		3.44162	3.08828			3.18792	0.0123978		3.19125	-0.398509		3.19125	0.00283867		3.18792	-0.600733
	3.44882	3.0493		3.44882	3.06478		3.44882	3.03806		3.44882	3.08822			3.19458	0.0126436		3.19792	-0.398949		3.19792	0.00249594		3.19458	-0.600316
	3.45602	3.05042		3.45602	3.0664		3.45602	3.03931		3.45602	3.08824			3.20125	0.0131652		3.20458	-0.39918		3.20458	0.00233203		3.20125	-0.599943
	3.46322	3.05104		3.46322	3.06747		3.46322	3.04038		3.46322	3.08839			3.20792	0.0137463		3.21125	-0.398748		3.21125	0.00219047		3.20792	-0.599869
	3.47042	3.05094		3.47042	3.0678		3.47042	3.04133		3.47042	3.08865			3.21458	0.0136644		3.21792	-0.397772		3.21792	0.00209361		3.21458	-0.600517
	3.47762	3.04997		3.47762	3.06723		3.47762	3.04221		3.47762	3.08883			3.22125	0.0130162		3.22458	-0.396729		3.22458	0.00231713		3.22125	-0.601545
	3.48482	3.04811		3.48482	3.06566		3.48482	3.04306		3.48482	3.08876			3.22792	0.0123605		3.23125	-0.395805		3.23125	0.00314415		3.22792	-0.602357
	3.49202	3.04548		3.49202	3.06311		3.49202	3.04391		3.49202	3.08833			3.23458	0.0119507		3.23792	-0.395708		3.23792	0.00444055		3.23458	-0.60311
	3.49922	3.04242		3.49922	3.05968		3.49922	3.04478		3.49922	3.08751			3.24125	0.0120327		3.24458	-0.396326		3.24458	0.00591576		3.24125	-0.603639
	3.50642	3.03943		3.50642	3.05563		3.50642	3.04563		3.50642	3.08634			3.24792	0.0124723		3.25125	-0.397533		3.25125	0.0070408		3.24792	-0.604339
	3.51362	3.03708		3.51362	3.05134		3.51362	3.04636		3.51362	3.08487			3.25458	0.0131652		3.25792	-0.399165		3.25792	0.00750273		3.25458	-0.605173
	3.52082	3.03587		3.52082	3.04729		3.52082	3.04682		3.52082	3.08319			3.26125	0.0136495		3.26458	-0.400692		3.26458	0.00721216		3.26125	-0.606187
	3.52802	3.03602		3.52802	3.04391		3.52802	3.04682		3.52802	3.08147			3.26792	0.0137463		3.27125	-0.40137		3.27125	0.00620633		3.26792	-0.607528
	3.53522	3.03749		3.53522	3.04157		3.53522	3.0462		3.53522	3.07996			3.27458	0.0132099		3.27792	-0.400618		3.27792	0.005126		3.27458	-0.609137
	3.54242	3.03996		3.54242	3.04055		3.54242	3.04481		3.54242	3.07892			3.28125	0.012286		3.28458	-0.399277		3.28458	0.00429899		3.28125	-0.610806
	3.54962	3.04298		3.54962	3.04093		3.54962	3.0426		3.54962	3.07851			3.28792	0.0113994		3.29125	-0.398502		3.29125	0.00403821		3.28792	-0.61205
	3.55682	3.04598		3.55682	3.0426		3.55682	3.03967		3.55682	3.07878			3.29458	0.0107214		3.29792	-0.398435		3.29792	0.00439584		3.29458	-0.612713
	3.56402	3.04832		3.56402	3.04525		3.56402	3.03625		3.56402	3.07969			3.30125	0.0106841		3.30458	-0.398859		3.30458	0.00529736		3.30125	-0.613108
	3.57122	3.04951		3.57122	3.04844		3.57122	3.03277		3.57122	3.08118			3.30792	0.0113323		3.31125	-0.399768		3.31125	0.00638515		3.30792	-0.613548
	3.57842	3.04927		3.57842	3.05164		3.57842	3.02966		3.57842	3.08313			3.31458	0.0127405		3.31792	-0.401109		3.31792	0.00686198		3.31458	-0.614129
	3.58562	3.04765		3.58562	3.05429		3.58562	3.02737		3.58562	3.08529			3.32125	0.0139773		3.32458	-0.402391		3.32458	0.00655651		3.32125	-0.614837
	3.59282	3.045		3.59282	3.05588		3.59282	3.02618		3.59282	3.08737			3.32792	0.0145659		3.33125	-0.403099		3.33125	0.0057742		3.32792	-0.615619
	3.60002	3.04175		3.60002	3.056		3.60002	3.02625		3.60002	3.08911			3.33458	0.0148416		3.33792	-0.403546		3.33792	0.00496209		3.33458	-0.61623
	3.60722	3.03837		3.60722	3.05455		3.60722	3.02755		3.60722	3.09044			3.34125	0.0150204		3.34458	-0.404261		3.34458	0.00434369		3.34125	-0.616275
	3.61442	3.03524		3.61442	3.05181		3.61442	3.02977		3.61442	3.09141			3.34792	0.0148118		3.35125	-0.405081		3.35125	0.00397861		3.34792	-0.615932
	3.62162	3.03272		3.62162	3.04834		3.62162	3.0325		3.62162	3.09213			3.35458	0.0141561		3.35792	-0.405625		3.35792	0.00404567		3.35458	-0.6155
	3.62882	3.03103		3.62882	3.04486		3.62882	3.03522		3.62882	3.09271			3.36125	0.0135154		3.36458	-0.405736		3.36458	0.00461936		3.36125	-0.615358
	3.63602	3.03025		3.63602	3.04214		3.63602	3.0375		3.63602	3.09326			3.36792	0.0131428		3.37125	-0.405714		3.37125	0.0051558		3.36792	-0.615291
	3.64322	3.03025		3.64322	3.04087		3.64322	3.03912		3.64322	3.0939			3.37458	0.0128746		3.37792	-0.405513		3.37792	0.00556558		3.37458	-0.615291
	3.65042	3.03077		3.65042	3.0416		3.65042	3.04005		3.65042	3.09476			3.38125	0.012584		3.38458	-0.405103		3.38458	0.00581145		3.38125	-0.615321
	3.65762	3.03158		3.65762	3.04458		3.65762	3.04043		3.65762	3.09581			3.38792	0.0123382		3.39125	-0.404589		3.39125	0.00616908		3.38792	-0.61553
	3.66482	3.03251		3.66482	3.04965		3.66482	3.04052		3.66482	3.09687			3.39458	0.0123084		3.39792	-0.404209		3.39792	0.00660866		3.39458	-0.616185
	3.67202	3.03349		3.67202	3.05628		3.67202	3.04059		3.67202	3.0977			3.40125	0.0126585		3.40458	-0.404209		3.40458	0.00667572		3.40125	-0.617176
	3.67922	3.03453		3.67922	3.06367		3.67922	3.04086		3.67922	3.09808			3.40792	0.0133663		3.41125	-0.404663		3.41125	0.00651181		3.40792	-0.618562
	3.68642	3.03569		3.68642	3.07105		3.68642	3.04148		3.68642	3.09796			3.41458	0.014089		3.41792	-0.405662		3.41792	0.00597537		3.41458	-0.620209
	3.69362	3.03705		3.69362	3.07767		3.69362	3.04241		3.69362	3.09738			3.42125	0.014469		3.42458	-0.406608		3.42458	0.00549108		3.42125	-0.622064
	3.70082	3.03868		3.70082	3.08297		3.70082	3.04347		3.70082	3.09643			3.42792	0.0146776		3.43125	-0.407435		3.43125	0.00549108		3.42792	-0.623502
	3.70802	3.04062		3.70802	3.08653		3.70802	3.04431		3.70802	3.09516			3.43458	0.0145882		3.43792	-0.408247		3.43792	0.0058338		3.43458	-0.624523
	3.71522	3.04288		3.71522	3.08819		3.71522	3.04459		3.71522	3.09364			3.44125	0.0140667		3.44458	-0.409417		3.44458	0.00628829		3.44125	-0.625297
	3.72242	3.04541		3.72242	3.08809		3.72242	3.04407		3.72242	3.09201			3.44792	0.0128001		3.45125	-0.410378		3.45125	0.00660121		3.44792	-0.625998
	3.72962	3.04807		3.72962	3.08652		3.72962	3.04272		3.72962	3.09051			3.45458	0.0115409		3.45792	-0.410654		3.45792	0.0071153		3.45458	-0.626542
	3.73682	3.05068		3.73682	3.0839		3.73682	3.04065		3.73682	3.08934			3.46125	0.0106245		3.46458	-0.410497		3.46458	0.00756979		3.46125	-0.627346
	3.74402	3.05305		3.74402	3.08069		3.74402	3.03807		3.74402	3.0886			3.46792	0.0100508		3.47125	-0.410527		3.47125	0.00713766		3.46792	-0.62868
	3.75122	3.05498		3.75122	3.07739		3.75122	3.03522		3.75122	3.08828			3.47458	0.00955164		3.47792	-0.41087		3.47792	0.00594556		3.47458	-0.629939
	3.75842	3.05634		3.75842	3.07448		3.75842	3.03243		3.75842	3.0884			3.48125	0.00928342		3.48458	-0.410825		3.48458	0.00491738		3.48125	-0.630826
	3.76562	3.05706		3.76562	3.07227		3.76562	3.03002		3.76562	3.08899			3.48792	0.00954419		3.49125	-0.410363		3.49125	0.00431389		3.48792	-0.631228
	3.77282	3.0571		3.77282	3.07092		3.77282	3.02824		3.77282	3.09011			3.49458	0.00975281		3.49792	-0.410125		3.49792	0.00355393		3.49458	-0.63169
	3.78002	3.05647		3.78002	3.07042		3.78002	3.02715		3.78002	3.09175			3.50125	0.0096187		3.50458	-0.410572		3.50458	0.0025928		3.50125	-0.631817
	3.78722	3.05523		3.78722	3.07072		3.78722	3.02665		3.78722	3.09372			3.50792	0.00929832		3.51125	-0.411235		3.51125	0.00202656		3.50792	-0.631817
	3.79442	3.05348		3.79442	3.07171		3.79442	3.02655		3.79442	3.09574			3.51458	0.00931323		3.51792	-0.411883		3.51792	0.00220537		3.51458	-0.631809
	3.80162	3.05138		3.80162	3.07323		3.80162	3.02669		3.80162	3.09759			3.52125	0.00956655		3.52458	-0.412285		3.52458	0.00273436		3.52125	-0.631981
	3.80882	3.04917		3.80882	3.07503		3.80882	3.02703		3.80882	3.09918			3.52792	0.00962615		3.53125	-0.41271		3.53125	0.00374019		3.52792	-0.632472
	3.81602	3.04706		3.81602	3.0769		3.81602	3.02759		3.81602	3.10045			3.53458	0.00954419		3.53792	-0.412993		3.53792	0.00525266		3.53458	-0.633217
	3.82322	3.04518		3.82322	3.07871		3.82322	3.02845		3.82322	3.10136			3.54125	0.00964105		3.54458	-0.413083		3.54458	0.00691414		3.54125	-0.634179
	3.83042	3.04359		3.83042	3.0804		3.83042	3.02972		3.83042	3.10176			3.54792	0.0102669		3.55125	-0.413023		3.55125	0.00824034		3.54792	-0.635102
	3.83762	3.04232		3.83762	3.08192		3.83762	3.03153		3.83762	3.10153			3.55458	0.0111312		3.55792	-0.41274		3.55792	0.00905246		3.55458	-0.636101
	3.84482	3.04149		3.84482	3.0831		3.84482	3.03395		3.84482	3.1006			3.56125	0.0117123		3.56458	-0.41303		3.56458	0.0090301		3.56125	-0.637151
	3.85202	3.04115		3.85202	3.08373		3.85202	3.03696		3.85202	3.09897			3.56792	0.011988		3.57125	-0.41382		3.57125	0.00794977		3.56792	-0.638194
	3.85922	3.04127		3.85922	3.08364		3.85922	3.04036		3.85922	3.09667			3.57458	0.0122711		3.57792	-0.414826		3.57792	0.00632554		3.57458	-0.639059
	3.86642	3.04174		3.86642	3.0828		3.86642	3.04372		3.86642	3.09377			3.58125	0.0128523		3.58458	-0.415578		3.58458	0.00501424		3.58125	-0.639826
	3.87362	3.04236		3.87362	3.08127		3.87362	3.04652		3.87362	3.09041			3.58792	0.0130981		3.59125	-0.416219		3.59125	0.00447035		3.58792	-0.640459
	3.88082	3.04304		3.88082	3.07918		3.88082	3.04828		3.88082	3.08691			3.59458	0.0128075		3.59792	-0.416972		3.59792	0.00461191		3.59458	-0.640914
	3.88802	3.04377		3.88802	3.0767		3.88802	3.0487		3.88802	3.0837			3.60125	0.0124052		3.60458	-0.417426		3.60458	0.00502169		3.60125	-0.6411
	3.89522	3.04463		3.89522	3.07408		3.89522	3.04773		3.89522	3.08126			3.60792	0.0123605		3.61125	-0.417404		3.61125	0.00566244		3.60792	-0.640877
	3.90242	3.04566		3.90242	3.07164		3.90242	3.04556		3.90242	3.0799			3.61458	0.012368		3.61792	-0.417158		3.61792	0.00608712		3.61458	-0.640482
	3.90963	3.04689		3.90963	3.06968		3.90963	3.04253		3.90963	3.07975			3.62125	0.0120029		3.62458	-0.41721		3.62458	0.00604242		3.62125	-0.640415
	3.91683	3.04843		3.91683	3.06841		3.91683	3.03911		3.91683	3.08065			3.62792	0.0115782		3.63125	-0.417493		3.63125	0.00546128		3.62792	-0.640966
	3.92403	3.05037		3.92403	3.06785		3.92403	3.03587		3.92403	3.08227			3.63458	0.0115111		3.63792	-0.417873		3.63792	0.00457466		3.63458	-0.641957
	3.93123	3.05281		3.93123	3.0679		3.93123	3.03342		3.93123	3.08411			3.64125	0.0117049		3.64458	-0.418358		3.64458	0.0044778		3.64125	-0.643015
	3.93843	3.05569		3.93843	3.0684		3.93843	3.03221		3.93843	3.08567			3.64792	0.0119805		3.65125	-0.419058		3.65125	0.00505894		3.64792	-0.644207
	3.94563	3.05876		3.94563	3.06925		3.94563	3.03238		3.94563	3.08653			3.65458	0.0123382		3.65792	-0.41955		3.65792	0.00625849		3.65458	-0.645243
	3.95283	3.06169		3.95283	3.0704		3.95283	3.03373		3.95283	3.08648			3.66125	0.0127554		3.66458	-0.419438		3.66458	0.00731647		3.66125	-0.645719
	3.96003	3.06412		3.96003	3.07183		3.96003	3.03587		3.96003	3.08551			3.66792	0.0128075		3.67125	-0.419013		3.67125	0.00812858		3.66792	-0.645533
	3.96723	3.06572		3.96723	3.07348		3.96723	3.03833		3.96723	3.08383			3.67458	0.0124425		3.67792	-0.418469		3.67792	0.00847131		3.67458	-0.645123
	3.97443	3.06623		3.97443	3.07526		3.97443	3.04068		3.97443	3.08181			3.68125	0.0119805		3.68458	-0.41797		3.68458	0.00801682		3.68125	-0.64487
	3.98163	3.06554		3.98163	3.07704		3.98163	3.04247		3.98163	3.07989			3.68792	0.0115335		3.69125	-0.417501		3.69125	0.00728667		3.68792	-0.644639
	3.98883	3.06368		3.98883	3.07868		3.98883	3.04335		3.98883	3.07848			3.69458	0.0112876		3.69792	-0.417456		3.69792	0.00654161		3.69458	-0.64446
	3.99603	3.0609		3.99603	3.07998		3.99603	3.04312		3.99603	3.07786			3.70125	0.0111461		3.70458	-0.418089		3.70458	0.00634789		3.70125	-0.644833
	4.00323	3.05751		4.00323	3.08067		4.00323	3.04188		4.00323	3.07808			3.70792	0.0113919		3.71125	-0.418946		3.71125	0.00681728		3.70792	-0.646114
	4.01043	3.05385		4.01043	3.08047		4.01043	3.03999		4.01043	3.079			3.71458	0.0116974		3.71792	-0.419728		3.71792	0.00775605		3.71458	-0.647672
	4.01763	3.05023		4.01763	3.07919		4.01763	3.03795		4.01763	3.08041			3.72125	0.0119507		3.72458	-0.420153		3.72458	0.00876933		3.72125	-0.649258
	4.02483	3.04687		4.02483	3.07686		4.02483	3.03617		4.02483	3.08208			3.72792	0.0122339		3.73125	-0.420474		3.73125	0.00911206		3.72792	-0.650644
	4.03203	3.04395		4.03203	3.07376		4.03203	3.03493		4.03203	3.08381			3.73458	0.0125542		3.73792	-0.421241		3.73792	0.00886619		3.73458	-0.652105
	4.03923	3.04158		4.03923	3.07029		4.03923	3.03433		4.03923	3.08543			3.74125	0.0129715		3.74458	-0.422165		3.74458	0.00828505		3.74125	-0.653096
	4.04643	3.03972		4.04643	3.06678		4.04643	3.03434		4.04643	3.08677			3.74792	0.0132173		3.75125	-0.423066		3.75125	0.00749528		3.74792	-0.653222
	4.05363	3.03826		4.05363	3.06349		4.05363	3.03481		4.05363	3.08773			3.75458	0.0133961		3.75792	-0.423893		3.75792	0.00651181		3.75458	-0.653125
	4.06083	3.03707		4.06083	3.06064		4.06083	3.03553		4.06083	3.08831			3.76125	0.013642		3.76458	-0.425063		3.76458	0.00537187		3.76125	-0.652999
	4.06803	3.03606		4.06803	3.05833		4.06803	3.03617		4.06803	3.08868			3.76792	0.0140965		3.77125	-0.426285		3.77125	0.00441819		3.76792	-0.653438
	4.07523	3.03526		4.07523	3.05663		4.07523	3.03644		4.07523	3.08904			3.77458	0.0144392		3.77792	-0.426799		3.77792	0.00345707		3.77458	-0.653997
	4.08243	3.0347		4.08243	3.05544		4.08243	3.03618		4.08243	3.08959			3.78125	0.0145137		3.78458	-0.426687		3.78458	0.00279397		3.78125	-0.654519
	4.08963	3.03439		4.08963	3.05448		4.08963	3.03546		4.08963	3.0904			3.78792	0.0143051		3.79125	-0.426479		3.79125	0.00246614		3.78792	-0.654966
	4.09683	3.03434		4.09683	3.0535		4.09683	3.03454		4.09683	3.0914			3.79458	0.0140816		3.79792	-0.426382		3.79792	0.00223517		3.79458	-0.655651
	4.10403	3.03455		4.10403	3.05239		4.10403	3.0338		4.10403	3.09253			3.80125	0.0136346		3.80458	-0.42592		3.80458	0.00206381		3.80125	-0.656813
	4.11123	3.0351		4.11123	3.05126		4.11123	3.03347		4.11123	3.09373			3.80792	0.0124276		3.81125	-0.425413		3.81125	0.00198931		3.80792	-0.657842
	4.11843	3.03609		4.11843	3.05031		4.11843	3.03366		4.11843	3.09496			3.81458	0.010848		3.81792	-0.424989		3.81792	0.00267476		3.81458	-0.658572
	4.12563	3.03751		4.12563	3.04971		4.12563	3.03437		4.12563	3.09608			3.82125	0.00937283		3.82458	-0.424817		3.82458	0.00354648		3.82125	-0.659361
	4.13283	3.03928		4.13283	3.04946		4.13283	3.03559		4.13283	3.09685			3.82792	0.00875443		3.83125	-0.424437		3.83125	0.00388175		3.82792	-0.660643
	4.14003	3.04122		4.14003	3.04946		4.14003	3.03726		4.14003	3.09708			3.83458	0.00865012		3.83792	-0.424102		3.83792	0.00386685		3.83458	-0.662014
	4.14723	3.04315		4.14723	3.04961		4.14723	3.03922		4.14723	3.09679			3.84125	0.00876933		3.84458	-0.424385		3.84458	0.00362098		3.84125	-0.662901
	4.15443	3.0449		4.15443	3.04983		4.15443	3.0412		4.15443	3.09625			3.84792	0.00954419		3.85125	-0.424892		3.85125	0.0038445		3.84792	-0.663303
	4.16163	3.04632		4.16163	3.05004		4.16163	3.04292		4.16163	3.09589			3.85458	0.010781		3.85792	-0.425205		3.85792	0.00378489		3.85458	-0.663511
	4.16883	3.04731		4.16883	3.05008		4.16883	3.04427		4.16883	3.09604			3.86125	0.0121742		3.86458	-0.425339		3.86458	0.00372529		3.86125	-0.663526
	4.17603	3.04775		4.17603	3.04979		4.17603	3.04524		4.17603	3.09691			3.86792	0.0126734		3.87125	-0.42554		3.87125	0.00418723		3.86792	-0.663124
	4.18323	3.04759		4.18323	3.04918		4.18323	3.04593		4.18323	3.09855			3.87458	0.0123531		3.87792	-0.425883		3.87792	0.00507385		3.87458	-0.66255
	4.19043	3.04682		4.19043	3.04847		4.19043	3.04637		4.19043	3.10092			3.88125	0.0118092		3.88458	-0.426069		3.88458	0.0064075		3.88125	-0.662282
	4.19763	3.04552		4.19763	3.04803		4.19763	3.04659		4.19763	3.10383			3.88792	0.0114888		3.89125	-0.426404		3.89125	0.0076592		3.88792	-0.662573
	4.20483	3.04379		4.20483	3.04813		4.20483	3.0466		4.20483	3.1069			3.89458	0.0114366		3.89792	-0.427224		3.89792	0.00911206		3.89458	-0.663228
	4.21203	3.04179		4.21203	3.04883		4.21203	3.04646		4.21203	3.10959			3.90125	0.011377		3.90458	-0.428066		3.90458	0.0102967		3.90125	-0.664413
	4.21923	3.03962		4.21923	3.05003		4.21923	3.04622		4.21923	3.11129			3.90792	0.0111982		3.91125	-0.429079		3.91125	0.0106618		3.90792	-0.665486
	4.22643	3.03745		4.22643	3.05156		4.22643	3.04583		4.22643	3.11162			3.91458	0.0109673		3.91792	-0.429988		3.91792	0.0103265		3.91458	-0.665762
	4.23363	3.03548		4.23363	3.05327		4.23363	3.04523		4.23363	3.11046			3.92125	0.0109598		3.92458	-0.430577		3.92458	0.00941008		3.92125	-0.665717
	4.24083	3.03393		4.24083	3.05492		4.24083	3.04437		4.24083	3.10804			3.92792	0.0110641		3.93125	-0.430681		3.93125	0.00812113		3.92792	-0.665881
	4.24803	3.03309		4.24803	3.0563		4.24803	3.04331		4.24803	3.10481			3.93458	0.0110492		3.93792	-0.430323		3.93792	0.00678003		3.93458	-0.666514
	4.25523	3.03321		4.25523	3.0572		4.25523	3.04216		4.25523	3.1013			3.94125	0.0110492		3.94458	-0.430048		3.94458	0.00569969		3.94125	-0.666715
	4.26243	3.03448		4.26243	3.05751		4.26243	3.04101		4.26243	3.09795			3.94792	0.0114217		3.95125	-0.429444		3.95125	0.00502914		3.94792	-0.666805
	4.26963	3.03695		4.26963	3.05727		4.26963	3.03999		4.26963	3.09509			3.95458	0.0121444		3.95792	-0.428692		3.95792	0.00476837		3.95458	-0.667349
	4.27683	3.04047		4.27683	3.05665		4.27683	3.03919		4.27683	3.09287			3.96125	0.0123158		3.96458	-0.428341		3.96458	0.00469387		3.96125	-0.667632
	4.28403	3.04475		4.28403	3.05591		4.28403	3.0387		4.28403	3.09128			3.96792	0.0118092		3.97125	-0.428744		3.97125	0.00469387		3.96792	-0.667512
	4.29123	3.04928		4.29123	3.05532		4.29123	3.03856		4.29123	3.09021			3.97458	0.0111982		3.97792	-0.429504		3.97792	0.00451505		3.97458	-0.667274
	4.29843	3.0535		4.29843	3.05513		4.29843	3.03867		4.29843	3.08952			3.98125	0.0106692		3.98458	-0.43004		3.98458	0.00421703		3.98125	-0.667661
	4.30563	3.05684		4.30563	3.05542		4.30563	3.03893		4.30563	3.08906			3.98792	0.00981987		3.99125	-0.430621		3.99125	0.00417233		3.98792	-0.668414
	4.31283	3.05882		4.31283	3.05613		4.31283	3.03921		4.31283	3.08874			3.99458	0.00840425		3.99792	-0.431329		3.99792	0.00435114		3.99458	-0.669256
	4.32003	3.05917		4.32003	3.05712		4.32003	3.03939		4.32003	3.08853			4.00125	0.00747293		4.00458	-0.431821		4.00458	0.00480562		4.00125	-0.670396
	4.32723	3.05789		4.32723	3.05824		4.32723	3.03948		4.32723	3.08848			4.00792	0.00742078		4.01125	-0.431575		4.01125	0.00549853		4.00792	-0.671685
	4.33443	3.05526		4.33443	3.05925		4.33443	3.03952		4.33443	3.08867			4.01458	0.00742078		4.01792	-0.431113		4.01792	0.00598282		4.01458	-0.672743
	4.34163	3.05184		4.34163	3.05991		4.34163	3.03964		4.34163	3.0892			4.02125	0.00694394		4.02458	-0.43124		4.02458	0.00613928		4.02125	-0.673443
	4.34883	3.0482		4.34883	3.05989		4.34883	3.04		4.34883	3.09005			4.02792	0.00669062		4.03125	-0.431925		4.03125	0.0057891		4.02792	-0.674054
	4.35603	3.04489		4.35603	3.05899		4.35603	3.04075		4.35603	3.09107			4.03458	0.00752509		4.03792	-0.432439		4.03792	0.00535697		4.03458	-0.67465
	4.36323	3.04226		4.36323	3.05726		4.36323	3.042		4.36323	3.09204			4.04125	0.00863522		4.04458	-0.432432		4.04458	0.00520796		4.04125	-0.675179
	4.37043	3.04051		4.37043	3.05496		4.37043	3.04374		4.37043	3.09286			4.04792	0.00919402		4.05125	-0.432365		4.05125	0.00556558		4.04792	-0.675574
	4.37763	3.03966		4.37763	3.05247		4.37763	3.04585		4.37763	3.0936			4.05458	0.00977516		4.05792	-0.432469		4.05792	0.00657141		4.05458	-0.675939
	4.38483	3.03956		4.38483	3.05008		4.38483	3.04813		4.38483	3.09442			4.06125	0.0110269		4.06458	-0.432186		4.06458	0.00780821		4.06125	-0.6762
	4.39203	3.03998		4.39203	3.04803		4.39203	3.05026		4.39203	3.09543			4.06792	0.012368		4.07125	-0.431411		4.07125	0.00914931		4.06792	-0.676461
	4.39923	3.04067		4.39923	3.04653		4.39923	3.05185		4.39923	3.09664			4.07458	0.0128746		4.07792	-0.430442		4.07792	0.010103		4.07458	-0.676692
	4.40643	3.04147		4.40643	3.04585		4.40643	3.05265		4.40643	3.09796			4.08125	0.0129491		4.08458	-0.429794		4.08458	0.0103116		4.08125	-0.677019
	4.41363	3.04232		4.41363	3.04612		4.41363	3.05248		4.41363	3.0993			4.08792	0.0132397		4.09125	-0.429511		4.09125	0.00940263		4.08792	-0.677608
	4.42083	3.04323		4.42083	3.04728		4.42083	3.05133		4.42083	3.10054			4.09458	0.0135452		4.09792	-0.429608		4.09792	0.00799447		4.09458	-0.678249
	4.42803	3.04428		4.42803	3.04904		4.42803	3.04929		4.42803	3.10152			4.10125	0.0135824		4.10458	-0.430077		4.10458	0.00680983		4.10125	-0.679053
	4.43523	3.04546		4.43523	3.0511		4.43523	3.04656		4.43523	3.10197			4.10792	0.0136644		4.11125	-0.431105		4.11125	0.00588596		4.10792	-0.67991
	4.44243	3.04672		4.44243	3.05325		4.44243	3.04342		4.44243	3.10175			4.11458	0.0142753		4.11792	-0.432491		4.11792	0.00517815		4.11458	-0.681147
	4.44963	3.04793		4.44963	3.05543		4.44963	3.0402		4.44963	3.1008			4.12125	0.0148863		4.12458	-0.43387		4.12458	0.00502169		4.12125	-0.682935
	4.45683	3.04889		4.45683	3.05759		4.45683	3.03722		4.45683	3.09925			4.12792	0.0150129		4.13125	-0.434697		4.13125	0.00553578		4.12792	-0.685014
	4.46403	3.0494		4.46403	3.05958		4.46403	3.03472		4.46403	3.09731			4.13458	0.0148416		4.13792	-0.435024		4.13792	0.00612438		4.13458	-0.687115
	4.47123	3.0493		4.47123	3.06129		4.47123	3.03286		4.47123	3.09513			4.14125	0.0144839		4.14458	-0.435211		4.14458	0.00649691		4.14125	-0.688568
	4.47843	3.04846		4.47843	3.0627		4.47843	3.03175		4.47843	3.09283			4.14792	0.0140741		4.15125	-0.435203		4.15125	0.00675023		4.14792	-0.689268
	4.48563	3.04683		4.48563	3.0638		4.48563	3.03143		4.48563	3.09045			4.15458	0.0135228		4.15792	-0.434935		4.15792	0.00683963		4.15458	-0.689141
	4.49283	3.04448		4.49283	3.06461		4.49283	3.03178		4.49283	3.08801			4.16125	0.0132471		4.16458	-0.434794		4.16458	0.00663102		4.16125	-0.688508
	4.50003	3.04159		4.50003	3.06509		4.50003	3.0326		4.50003	3.08555			4.16792	0.013344		4.17125	-0.435509		4.17125	0.00653416		4.16792	-0.687853
	4.50723	3.03844		4.50723	3.06517		4.50723	3.03363		4.50723	3.08317			4.17458	0.0136644		4.17792	-0.436433		4.17792	0.00663847		4.17458	-0.687636
	4.51443	3.03535		4.51443	3.06483		4.51443	3.03463		4.51443	3.08099			4.18125	0.0141412		4.18458	-0.437088		4.18458	0.00680238		4.18125	-0.688098
	4.52163	3.03261		4.52163	3.06407		4.52163	3.03544		4.52163	3.07923			4.18792	0.0147298		4.19125	-0.437386		4.19125	0.00701845		4.18792	-0.688955
	4.52883	3.03045		4.52883	3.0629		4.52883	3.03591		4.52883	3.0781			4.19458	0.0150576		4.19792	-0.438012		4.19792	0.00742823		4.19458	-0.68976
	4.53603	3.02905		4.53603	3.06137		4.53603	3.03588		4.53603	3.07783			4.20125	0.0149533		4.20458	-0.438981		4.20458	0.00777096		4.20125	-0.690356
	4.54323	3.02857		4.54323	3.05952		4.54323	3.03525		4.54323	3.07861			4.20792	0.0145361		4.21125	-0.439554		4.21125	0.00755489		4.20792	-0.690535
	4.55043	3.02904		4.55043	3.05747		4.55043	3.03409		4.55043	3.08055			4.21458	0.0139326		4.21792	-0.439964		4.21792	0.00695139		4.21458	-0.69046
	4.55763	3.0304		4.55763	3.05532		4.55763	3.03261		4.55763	3.08356			4.22125	0.0130162		4.22458	-0.440352		4.22458	0.00616908		4.22125	-0.690363
	4.56483	3.03256		4.56483	3.05313		4.56483	3.0311		4.56483	3.08734			4.22792	0.0117943		4.23125	-0.440724		4.23125	0.00529736		4.22792	-0.690728
	4.57203	3.03535		4.57203	3.05101		4.57203	3.02977		4.57203	3.09145			4.23458	0.0108927		4.23792	-0.440955		4.23792	0.0044927		4.23458	-0.691704
	4.57923	3.03864		4.57923	3.04911		4.57923	3.02876		4.57923	3.09545			4.24125	0.0105426		4.24458	-0.440732		4.24458	0.00409037		4.24125	-0.692502
	4.58643	3.04224		4.58643	3.04765		4.58643	3.02814		4.58643	3.09891			4.24792	0.0107735		4.25125	-0.440113		4.25125	0.00396371		4.24792	-0.692859
	4.59363	3.04591		4.59363	3.04683		4.59363	3.02801		4.59363	3.10156			4.25458	0.0115484		4.25792	-0.43942		4.25792	0.00365824		4.25458	-0.692979
	4.60083	3.0494		4.60083	3.04679		4.60083	3.02845		4.60083	3.10323			4.26125	0.0126809		4.26458	-0.439093		4.26458	0.00306964		4.26125	-0.693478
	4.60803	3.05247		4.60803	3.04753		4.60803	3.02947		4.60803	3.10391			4.26792	0.0137463		4.27125	-0.439465		4.27125	0.00252575		4.26792	-0.694118
	4.61523	3.05498		4.61523	3.049		4.61523	3.03094		4.61523	3.10375			4.27458	0.0144243		4.27792	-0.439979		4.27792	0.0025034		4.27458	-0.694707
	4.62243	3.05678		4.62243	3.05108		4.62243	3.03267		4.62243	3.10304			4.28125	0.0148714		4.28458	-0.440449		4.28458	0.00285357		4.28125	-0.695392
	4.62963	3.05777		4.62963	3.05355		4.62963	3.03454		4.62963	3.10212			4.28792	0.0149682		4.29125	-0.441194		4.29125	0.00340492		4.28792	-0.696279
	4.63683	3.05786		4.63683	3.05614		4.63683	3.03651		4.63683	3.10127			4.29458	0.0144914		4.29792	-0.441819		4.29792	0.00438094		4.29458	-0.697225
	4.64403	3.05701		4.64403	3.05854		4.64403	3.03866		4.64403	3.10057			4.30125	0.0137836		4.30458	-0.44208		4.30458	0.0057593		4.30125	-0.697434
	4.65123	3.05539		4.65123	3.06047		4.65123	3.04101		4.65123	3.09996			4.30792	0.013046		4.31125	-0.441618		4.31125	0.00740588		4.30792	-0.697024
	4.65843	3.05322		4.65843	3.06173		4.65843	3.04351		4.65843	3.09938			4.31458	0.0125691		4.31792	-0.441276		4.31792	0.00837445		4.31458	-0.696525
	4.66563	3.05073		4.66563	3.06222		4.66563	3.04607		4.66563	3.09874			4.32125	0.0121966		4.32458	-0.441313		4.32458	0.00860542		4.32125	-0.696577
	4.67283	3.04806		4.67283	3.06197		4.67283	3.04864		4.67283	3.09799			4.32792	0.0123829		4.33125	-0.441723		4.33125	0.008367		4.32792	-0.697225
	4.68003	3.04528		4.68003	3.06109		4.68003	3.05123		4.68003	3.09707			4.33458	0.0130832		4.33792	-0.442229		4.33792	0.0077635		4.33458	-0.697866
	4.68723	3.04248		4.68723	3.05974		4.68723	3.05384		4.68723	3.09595			4.34125	0.0138134		4.34458	-0.442594		4.34458	0.0070557		4.34125	-0.698604
	4.69443	3.03973		4.69443	3.05811		4.69443	3.05641		4.69443	3.0947			4.34792	0.0144988		4.35125	-0.44328		4.35125	0.00634044		4.34792	-0.699684
	4.70163	3.03711		4.70163	3.05632		4.70163	3.0588		4.70163	3.09352			4.35458	0.0151694		4.35792	-0.444144		4.35792	0.00604242		4.35458	-0.700921
	4.70883	3.03465		4.70883	3.05448		4.70883	3.06085		4.70883	3.09269			4.36125	0.0158995		4.36458	-0.445068		4.36458	0.00625104		4.36125	-0.701711
	4.71603	3.03238		4.71603	3.05269		4.71603	3.06247		4.71603	3.09238			4.36792	0.0161752		4.37125	-0.445247		4.37125	0.00706315		4.36792	-0.701942
	4.72323	3.03041		4.72323	3.051		4.72323	3.06358		4.72323	3.09262			4.37458	0.0158921		4.37792	-0.445105		4.37792	0.0083819		4.37458	-0.702202
	4.73043	3.02894		4.73043	3.04943		4.73043	3.06416		4.73043	3.0933			4.38125	0.0153705		4.38458	-0.444919		4.38458	0.00951439		4.38125	-0.702858
	4.73763	3.02811		4.73763	3.04798		4.73763	3.06408		4.73763	3.09414			4.38792	0.0148416		4.39125	-0.44474		4.39125	0.0101924		4.38792	-0.703774
	4.74483	3.02795		4.74483	3.0467		4.74483	3.06318		4.74483	3.09486			4.39458	0.0141263		4.39792	-0.444278		4.39792	0.0103489		4.39458	-0.704549
	4.75203	3.02836		4.75203	3.04576		4.75203	3.06132		4.75203	3.09514			4.40125	0.0130311		4.40458	-0.443809		4.40458	0.00985712		4.40125	-0.70519
	4.75923	3.02913		4.75923	3.04531		4.75923	3.05842		4.75923	3.09477			4.40792	0.0116006		4.41125	-0.443943		4.41125	0.00865012		4.40792	-0.705406
	4.76643	3.03006		4.76643	3.04548		4.76643	3.05453		4.76643	3.0937			4.41458	0.0104532		4.41792	-0.444464		4.41792	0.00723451		4.41458	-0.705153
	4.77363	3.03091		4.77363	3.04621		4.77363	3.04974		4.77363	3.09208			4.42125	0.00976771		4.42458	-0.444993		4.42458	0.00665337		4.42125	-0.704505
	4.78083	3.03148		4.78083	3.04738		4.78083	3.04421		4.78083	3.09021			4.42792	0.00947714		4.43125	-0.445321		4.43125	0.0064671		4.42792	-0.703387
	4.78803	3.03166		4.78803	3.04878		4.78803	3.03813		4.78803	3.08849			4.43458	0.00967085		4.43792	-0.445433		4.43792	0.00634789		4.43458	-0.702135
	4.79523	3.03147		4.79523	3.05018		4.79523	3.03186		4.79523	3.08732			4.44125	0.0101328		4.44458	-0.445127		4.44458	0.00617653		4.44125	-0.701256
	4.80243	3.03107		4.80243	3.05134		4.80243	3.02583		4.80243	3.08706			4.44792	0.0106618		4.45125	-0.444457		4.45125	0.00640005		4.44792	-0.701457
	4.80963	3.03066		4.80963	3.05206		4.80963	3.02058		4.80963	3.08787			4.45458	0.0109598		4.45792	-0.443764		4.45792	0.00679493		4.45458	-0.702709
	4.81683	3.03044		4.81683	3.05223		4.81683	3.01658		4.81683	3.08961			4.46125	0.0112355		4.46458	-0.443727		4.46458	0.00660866		4.46125	-0.704482
	4.82403	3.03051		4.82403	3.05195		4.82403	3.01416		4.82403	3.09187			4.46792	0.0118688		4.47125	-0.444397		4.47125	0.00614673		4.46792	-0.706635
	4.83123	3.03087		4.83123	3.05147		4.83123	3.0135		4.83123	3.09415			4.47458	0.0122711		4.47792	-0.445388		4.47792	0.00582635		4.47458	-0.708967
	4.83843	3.03137		4.83843	3.05108		4.83843	3.01453		4.83843	3.09605			4.48125	0.0123978		4.48458	-0.446364		4.48458	0.00599027		4.48125	-0.711031
	4.84563	3.03177		4.84563	3.05108		4.84563	3.01704		4.84563	3.09725			4.48792	0.0125617		4.49125	-0.447214		4.49125	0.00604987		4.48792	-0.71241
	4.85283	3.03175		4.85283	3.0516		4.85283	3.02063		4.85283	3.09758			4.49458	0.0128075		4.49792	-0.448063		4.49792	0.0051856		4.49458	-0.712894
	4.86003	3.03109		4.86003	3.05263		4.86003	3.02482		4.86003	3.097			4.50125	0.0132173		4.50458	-0.448413		4.50458	0.00393391		4.50125	-0.712976
	4.86723	3.02973		4.86723	3.05411		4.86723	3.02908		4.86723	3.09563			4.50792	0.0134185		4.51125	-0.448257		4.51125	0.00292063		4.50792	-0.71279
	4.87443	3.02781		4.87443	3.05588		4.87443	3.03295		4.87443	3.09372			4.51458	0.0137165		4.51792	-0.44807		4.51792	0.00242144		4.51458	-0.712551
	4.88163	3.02556		4.88163	3.05781		4.88163	3.03611		4.88163	3.09172			4.52125	0.014022		4.52458	-0.44819		4.52458	0.0018701		4.52125	-0.712462
	4.88883	3.02326		4.88883	3.05973		4.88883	3.03847		4.88883	3.09001			4.52792	0.0142008		4.53125	-0.448585		4.53125	0.00146031		4.52792	-0.712559
	4.89603	3.0212		4.89603	3.0615		4.89603	3.04009		4.89603	3.08881			4.53458	0.0142381		4.53792	-0.449017		4.53792	0.0019148		4.53458	-0.713006
	4.90323	3.0197		4.90323	3.06304		4.90323	3.04113		4.90323	3.08808			4.54125	0.0139847		4.54458	-0.449978		4.54458	0.00330806		4.54125	-0.713736
	4.91043	3.01902		4.91043	3.06427		4.91043	3.04173		4.91043	3.08766			4.54792	0.013493		4.55125	-0.451006		4.55125	0.00497699		4.54792	-0.714876
	4.91763	3.01927		4.91763	3.06522		4.91763	3.04199		4.91763	3.08744			4.55458	0.0128746		4.55792	-0.45152		4.55792	0.00600517		4.55458	-0.716448
	4.92483	3.02032		4.92483	3.06587		4.92483	3.04196		4.92483	3.0875			4.56125	0.0123531		4.56458	-0.451416		4.56458	0.00647455		4.56125	-0.718057
	4.93203	3.0219		4.93203	3.06621		4.93203	3.04167		4.93203	3.08797			4.56792	0.0121295		4.57125	-0.451304		4.57125	0.00648946		4.56792	-0.719503
	4.93923	3.02373		4.93923	3.06628		4.93923	3.04115		4.93923	3.08899			4.57458	0.0121444		4.57792	-0.451557		4.57792	0.0064224		4.57458	-0.720523
	4.94643	3.02567		4.94643	3.06618		4.94643	3.04053		4.94643	3.09055			4.58125	0.0121519		4.58458	-0.451617		4.58458	0.00586361		4.58125	-0.720821
	4.95363	3.02761		4.95363	3.06606		4.95363	3.03993		4.95363	3.09259			4.58792	0.0121221		4.59125	-0.451349		4.59125	0.00516325		4.58792	-0.720531
	4.96083	3.02947		4.96083	3.06607		4.96083	3.0396		4.96083	3.09509			4.59458	0.0121146		4.59792	-0.451468		4.59792	0.00485033		4.59458	-0.719592
	4.96803	3.03113		4.96803	3.06625		4.96803	3.03976		4.96803	3.09799			4.60125	0.0118762		4.60458	-0.452153		4.60458	0.0051111		4.60125	-0.718467
	4.97523	3.03258		4.97523	3.06653		4.97523	3.04058		4.97523	3.101			4.60792	0.0113174		4.61125	-0.452839		4.61125	0.00549108		4.60792	-0.717387
	4.98243	3.03388		4.98243	3.06678		4.98243	3.04218		4.98243	3.10355			4.61458	0.0108704		4.61792	-0.452951		4.61792	0.00544637		4.61458	-0.716522
	4.98963	3.03513		4.98963	3.06682		4.98963	3.04453		4.98963	3.10488			4.62125	0.0105277		4.62458	-0.45234		4.62458	0.00533462		4.62125	-0.715986
	4.99683	3.03638		4.99683	3.06644		4.99683	3.04746		4.99683	3.10441			4.62792	0.0102445		4.63125	-0.4519		4.63125	0.00480562		4.62792	-0.715598
	5.00403	3.03753		5.00403	3.06541		5.00403	3.05068		5.00403	3.1019			4.63458	0.00982732		4.63792	-0.45158		4.63792	0.00362098		4.63458	-0.715613
	5.01123	3.0384		5.01123	3.06365		5.01123	3.05386		5.01123	3.0975			4.64125	0.0100732		4.64458	-0.45155		4.64458	0.00210851		4.64125	-0.715889
	5.01843	3.03887		5.01843	3.06134		5.01843	3.05672		5.01843	3.0916			4.64792	0.0107363		4.65125	-0.451803		4.65125	0.00147521		4.64792	-0.716291
	5.02563	3.0389		5.02563	3.05887		5.02563	3.05904		5.02563	3.08477			4.65458	0.0110045		4.65792	-0.45231		4.65792	0.00204146		4.65458	-0.717074
	5.03283	3.03859		5.03283	3.05682		5.03283	3.06063		5.03283	3.07776			4.66125	0.011012		4.66458	-0.452861		4.66458	0.00313669		4.66125	-0.718176
	5.04003	3.03808		5.04003	3.05558		5.04003	3.06128		5.04003	3.07139			4.66792	0.0110716		4.67125	-0.452995		4.67125	0.00450015		4.66792	-0.719562
	5.04723	3.03755		5.04723	3.05531		5.04723	3.0608		5.04723	3.06648			4.67458	0.0114515		4.67792	-0.452921		4.67792	0.00622123		4.67458	-0.721015
	5.05443	3.03717		5.05443	3.05594		5.05443	3.05907		5.05443	3.06352			4.68125	0.0115633		4.68458	-0.45298		4.68458	0.00784546		4.68125	-0.722542
	5.06163	3.03706		5.06163	3.05725		5.06163	3.05611		5.06163	3.06257			4.68792	0.0114664		4.69125	-0.453271		4.69125	0.00853091		4.68792	-0.724345
	5.06883	3.03734		5.06883	3.05885		5.06883	3.05211		5.06883	3.0633			4.69458	0.0117123		4.69792	-0.453673		4.69792	0.00844151		4.69458	-0.725746
	5.07603	3.038		5.07603	3.06026		5.07603	3.0474		5.07603	3.06517			4.70125	0.0122264		4.70458	-0.454374		4.70458	0.00820309		4.70125	-0.72673
	5.08323	3.0389		5.08323	3.06095		5.08323	3.04245		5.08323	3.06759			4.70792	0.0129491		4.71125	-0.455096		4.71125	0.00797957		4.70792	-0.727244
	5.09043	3.03979		5.09043	3.06054		5.09043	3.03784		5.09043	3.07007			4.71458	0.0137612		4.71792	-0.455715		4.71792	0.00763685		4.71458	-0.727221
	5.09763	3.04044		5.09763	3.05899		5.09763	3.03417		5.09763	3.07221			4.72125	0.0145733		4.72458	-0.455685		4.72458	0.00742078		4.72125	-0.726946
	5.10483	3.04068		5.10483	3.05662		5.10483	3.03189		5.10483	3.07382			4.72792	0.0153556		4.73125	-0.45497		4.73125	0.00730902		4.72792	-0.726357
	5.11203	3.04047		5.11203	3.05398		5.11203	3.03126		5.11203	3.07486			4.73458	0.0160411		4.73792	-0.453942		4.73792	0.00704825		4.73458	-0.726007
	5.11923	3.03986		5.11923	3.05164		5.11923	3.03228		5.11923	3.07544			4.74125	0.0165179		4.74458	-0.452824		4.74458	0.00654161		4.74125	-0.725895
	5.12643	3.03897		5.12643	3.05009		5.12643	3.0347		5.12643	3.07577			4.74792	0.0168458		4.75125	-0.451893		4.75125	0.00597537		4.74792	-0.725895
	5.13363	3.03791		5.13363	3.04966		5.13363	3.0381		5.13363	3.07611			4.75458	0.0170767		4.75792	-0.450745		4.75792	0.00565499		4.75458	-0.726044
	5.14083	3.03684		5.14083	3.05048		5.14083	3.04202		5.14083	3.07674			4.76125	0.0170469		4.76458	-0.450104		4.76458	0.00555813		4.76125	-0.726148
	5.14803	3.03587		5.14803	3.05248		5.14803	3.04608		5.14803	3.07791			4.76792	0.0164136		4.77125	-0.450581		4.77125	0.00582635		4.76792	-0.726268
	5.15523	3.03509		5.15523	3.05531		5.15523	3.05003		5.15523	3.07983			4.77458	0.0151098		4.77792	-0.452064		4.77792	0.00599772		4.77458	-0.726335
	5.16243	3.03449		5.16243	3.05848		5.16243	3.05368		5.16243	3.08262			4.78125	0.0139624		4.78458	-0.453852		4.78458	0.0057295		4.78125	-0.726372
	5.16963	3.03403		5.16963	3.06146		5.16963	3.05685		5.16963	3.08627			4.78792	0.0132844		4.79125	-0.455573		4.79125	0.00531226		4.78792	-0.726476
	5.17683	3.03364		5.17683	3.06387		5.17683	3.0593		5.17683	3.09067			4.79458	0.0129193		4.79792	-0.457488		4.79792	0.00497699		4.79458	-0.726536
	5.18403	3.0333		5.18403	3.06548		5.18403	3.06084		5.18403	3.09562			4.80125	0.0128374		4.80458	-0.458635		4.80458	0.00484288		4.80125	-0.726812
	5.19123	3.03299		5.19123	3.06624		5.19123	3.0613		5.19123	3.10075			4.80792	0.0131056		4.81125	-0.458434		4.81125	0.00493973		4.80792	-0.72743
	5.19843	3.03269		5.19843	3.06621		5.19843	3.06065		5.19843	3.10556			4.81458	0.0138953		4.81792	-0.45754		4.81792	0.00564754		4.81458	-0.728659
	5.20563	3.03236		5.20563	3.06555		5.20563	3.05892		5.20563	3.10943			4.82125	0.0146255		4.82458	-0.456832		4.82458	0.00661612		4.82125	-0.730194
	5.21283	3.03196		5.21283	3.06445		5.21283	3.05622		5.21283	3.11188			4.82792	0.0148118		4.83125	-0.456825		4.83125	0.00739098		4.82792	-0.731945
	5.22003	3.03143		5.22003	3.06315		5.22003	3.05282		5.22003	3.11268			4.83458	0.0143722		4.83792	-0.457138		4.83792	0.00806153		4.83458	-0.733867
	5.22723	3.03077		5.22723	3.06183		5.22723	3.04916		5.22723	3.11192			4.84125	0.0135526		4.84458	-0.45792		4.84458	0.00883639		4.84125	-0.735633
	5.23443	3.02999		5.23443	3.06054		5.23443	3.04578		5.23443	3.10994			4.84792	0.0129938		4.85125	-0.458978		4.85125	0.009574		4.84792	-0.737064
	5.24163	3.02915		5.24163	3.05933		5.24163	3.04318		5.24163	3.10718			4.85458	0.0128299		4.85792	-0.459276		4.85792	0.00976771		4.85458	-0.737697
	5.24883	3.02835		5.24883	3.05812		5.24883	3.04165		5.24883	3.10416			4.86125	0.0126809		4.86458	-0.458881		4.86458	0.00937283		4.86125	-0.738002
	5.25603	3.02771		5.25603	3.05695		5.25603	3.04121		5.25603	3.10147			4.86792	0.0126064		4.87125	-0.458248		4.87125	0.00855327		4.86792	-0.738055
	5.26323	3.02737		5.26323	3.0558		5.26323	3.0416		5.26323	3.09958			4.87458	0.0129491		4.87792	-0.457972		4.87792	0.00754744		4.87458	-0.737816
	5.27043	3.0274		5.27043	3.05471		5.27043	3.04252		5.27043	3.09874			4.88125	0.0140443		4.88458	-0.457875		4.88458	0.00671297		4.88125	-0.737377
	5.27763	3.02779		5.27763	3.05367		5.27763	3.04367		5.27763	3.09888			4.88792	0.0152737		4.89125	-0.457652		4.89125	0.00602007		4.88792	-0.736862
	5.28483	3.02839		5.28483	3.05269		5.28483	3.04474		5.28483	3.09966			4.89458	0.0159666		4.89792	-0.45763		4.89792	0.00539422		4.89458	-0.736564
	5.29203	3.02902		5.29203	3.05184		5.29203	3.04542		5.29203	3.10072			4.90125	0.0165701		4.90458	-0.458173		4.90458	0.0051111		4.90125	-0.73646
	5.29923	3.02953		5.29923	3.05114		5.29923	3.04544		5.29923	3.10177			4.90792	0.0171587		4.91125	-0.459053		4.91125	0.00538677		4.90792	-0.736512
	5.30643	3.0298		5.30643	3.0507		5.30643	3.04462		5.30643	3.10256			4.91458	0.0174195		4.91792	-0.45979		4.91792	0.00625849		4.91458	-0.737093
	5.31363	3.02982		5.31363	3.05058		5.31363	3.04306		5.31363	3.10291			4.92125	0.0170544		4.92458	-0.460222		4.92458	0.00701845		4.92125	-0.737831
	5.32083	3.02964		5.32083	3.05097		5.32083	3.04099		5.32083	3.10265			4.92792	0.0163317		4.93125	-0.460714		4.93125	0.00743568		4.92792	-0.738516
	5.32803	3.02939		5.32803	3.05206		5.32803	3.03881		5.32803	3.10168			4.93458	0.0159964		4.93792	-0.461556		4.93792	0.00754744		4.93458	-0.738978
	5.33523	3.02929		5.33523	3.05399		5.33523	3.0368		5.33523	3.10003			4.94125	0.0154823		4.94458	-0.462152		4.94458	0.00778586		4.94125	-0.739418
	5.34243	3.02954		5.34243	3.05679		5.34243	3.03517		5.34243	3.09783			4.94792	0.0149012		4.95125	-0.461929		4.95125	0.00827014		4.94792	-0.740319
	5.34963	3.03031		5.34963	3.06035		5.34963	3.03406		5.34963	3.09529			4.95458	0.0145435		4.95792	-0.461154		4.95792	0.0083819		4.95458	-0.741512
	5.35683	3.03162		5.35683	3.06453		5.35683	3.03353		5.35683	3.0926			4.96125	0.014849		4.96458	-0.460602		4.96458	0.00815839		4.96125	-0.742905
	5.36403	3.03341		5.36403	3.06907		5.36403	3.03357		5.36403	3.09001			4.96792	0.0156686		4.97125	-0.460647		4.97125	0.00766665		4.96792	-0.744097
	5.37123	3.03549		5.37123	3.0736		5.37123	3.03407		5.37123	3.08769			4.97458	0.0161007		4.97792	-0.460826		4.97792	0.00742078		4.97458	-0.745282
	5.37843	3.03768		5.37843	3.07761		5.37843	3.03474		5.37843	3.08583			4.98125	0.0161678		4.98458	-0.460833		4.98458	0.00716746		4.98125	-0.746094
	5.38563	3.03974		5.38563	3.08052		5.38563	3.0353		5.38563	3.08451			4.98792	0.0158697		4.99125	-0.461034		4.99125	0.00674278		4.98792	-0.745676
	5.39283	3.04146		5.39283	3.08189		5.39283	3.03552		5.39283	3.08368			4.99458	0.0153482		4.99792	-0.461385		4.99792	0.00613183		4.99458	-0.744067
	5.40003	3.0427		5.40003	3.08153		5.40003	3.03535		5.40003	3.08319			5.00125	0.0144914		5.00458	-0.461683		5.00458	0.00532717		5.00125	-0.742339
	5.40723	3.04341		5.40723	3.07947		5.40723	3.03494		5.40723	3.08279			5.00792	0.0132173		5.01125	-0.461638		5.01125	0.00442564		5.00792	-0.741914
	5.41443	3.04358		5.41443	3.07592		5.41443	3.03452		5.41443	3.08219			5.01458	0.0120029		5.01792	-0.461742		5.01792	0.00389665		5.01458	-0.742272
	5.42163	3.04322		5.42163	3.07122		5.42163	3.03422		5.42163	3.08119			5.02125	0.0112653		5.02458	-0.462115		5.02458	0.00409037		5.02125	-0.742994
	5.42883	3.04236		5.42883	3.06586		5.42883	3.0341		5.42883	3.07975			5.02792	0.01093		5.03125	-0.462569		5.03125	0.00474602		5.02792	-0.744052
	5.43603	3.04115		5.43603	3.06045		5.43603	3.03409		5.43603	3.07801			5.03458	0.0109002		5.03792	-0.463016		5.03792	0.00584126		5.03458	-0.745773
	5.44323	3.03977		5.44323	3.05558		5.44323	3.03412		5.44323	3.07623			5.04125	0.0107959		5.04458	-0.463553		5.04458	0.0069961		5.04125	-0.747554
	5.45043	3.03841		5.45043	3.05175		5.45043	3.03413		5.45043	3.07469			5.04792	0.010781		5.05125	-0.46438		5.05125	0.00814348		5.04792	-0.748597
	5.45763	3.03723		5.45763	3.04918		5.45763	3.03406		5.45763	3.07353			5.05458	0.01093		5.05792	-0.46508		5.05792	0.00853837		5.05458	-0.749089
	5.46483	3.0363		5.46483	3.04791		5.46483	3.03377		5.46483	3.07279			5.06125	0.0111535		5.06458	-0.465631		5.06458	0.00843406		5.06125	-0.749446
	5.47204	3.03565		5.47204	3.04783		5.47204	3.03319		5.47204	3.0724			5.06792	0.0112206		5.07125	-0.466019		5.07125	0.00803918		5.06792	-0.750281
	5.47924	3.03522		5.47924	3.04872		5.47924	3.03231		5.47924	3.0723			5.07458	0.0110343		5.07792	-0.466414		5.07792	0.00747293		5.07458	-0.751093
	5.48644	3.03496		5.48644	3.0503		5.48644	3.03124		5.48644	3.07241			5.08125	0.0109002		5.08458	-0.46654		5.08458	0.00704825		5.08125	-0.751913
	5.49364	3.03477		5.49364	3.05227		5.49364	3.03014		5.49364	3.07254			5.08792	0.0110194		5.09125	-0.466369		5.09125	0.00674278		5.08792	-0.752293
	5.50084	3.03459		5.50084	3.05433		5.50084	3.02914		5.50084	3.07253			5.09458	0.0111908		5.09792	-0.466004		5.09792	0.0069961		5.09458	-0.752442
	5.50804	3.03439		5.50804	3.05622		5.50804	3.02826		5.50804	3.07233			5.10125	0.0111684		5.10458	-0.465557		5.10458	0.0070855		5.10125	-0.752412
	5.51524	3.03426		5.51524	3.05777		5.51524	3.02745		5.51524	3.07212			5.10792	0.0111312		5.11125	-0.465117		5.11125	0.00718236		5.10792	-0.752367
	5.52244	3.03426		5.52244	3.05881		5.52244	3.02676		5.52244	3.07224			5.11458	0.0109151		5.11792	-0.464588		5.11792	0.00718981		5.11458	-0.752494
	5.52964	3.03443		5.52964	3.05919		5.52964	3.02625		5.52964	3.073			5.12125	0.0105426		5.12458	-0.464171		5.12458	0.0070408		5.12125	-0.752546
	5.53684	3.03477		5.53684	3.05889		5.53684	3.02603		5.53684	3.0745			5.12792	0.0100583		5.13125	-0.463858		5.13125	0.00713766		5.12792	-0.752769
	5.54404	3.03521		5.54404	3.05794		5.54404	3.02611		5.54404	3.07662			5.13458	0.0100285		5.13792	-0.46391		5.13792	0.00721961		5.13458	-0.753067
	5.55124	3.03563		5.55124	3.05644		5.55124	3.02646		5.55124	3.0792			5.14125	0.0106245		5.14458	-0.464343		5.14458	0.00779331		5.14125	-0.753425
	5.55844	3.03588		5.55844	3.05453		5.55844	3.02702		5.55844	3.08208			5.14792	0.0116602		5.15125	-0.46517		5.15125	0.00841171		5.14792	-0.753775
	5.56564	3.03574		5.56564	3.05238		5.56564	3.02775		5.56564	3.08512			5.15458	0.0129491		5.15792	-0.466153		5.15792	0.00911206		5.15458	-0.754312
	5.57284	3.03503		5.57284	3.05018		5.57284	3.0286		5.57284	3.08818			5.16125	0.0138208		5.16458	-0.466838		5.16458	0.00982732		5.16125	-0.755459
	5.58004	3.03372		5.58004	3.04816		5.58004	3.02948		5.58004	3.09103			5.16792	0.0142679		5.17125	-0.466876		5.17125	0.0100881		5.16792	-0.756942
	5.58724	3.0319		5.58724	3.04657		5.58724	3.03023		5.58724	3.09348			5.17458	0.0139698		5.17792	-0.466332		5.17792	0.0101179		5.17458	-0.758462
	5.59444	3.02984		5.59444	3.04555		5.59444	3.03068		5.59444	3.09548			5.18125	0.0133812		5.18458	-0.465594		5.18458	0.00955909		5.18125	-0.759773
	5.60164	3.02783		5.60164	3.0451		5.60164	3.03069		5.60164	3.09715			5.18792	0.0127703		5.19125	-0.46476		5.19125	0.00865012		5.18792	-0.760719
	5.60884	3.02611		5.60884	3.04502		5.60884	3.03028		5.60884	3.09861			5.19458	0.0124648		5.19792	-0.464343		5.19792	0.00750273		5.19458	-0.761412
	5.61604	3.0248		5.61604	3.04506		5.61604	3.02949		5.61604	3.09991			5.20125	0.012964		5.20458	-0.46473		5.20458	0.00633299		5.20125	-0.76142
	5.62324	3.02401		5.62324	3.045		5.62324	3.02846		5.62324	3.10096			5.20792	0.0137612		5.21125	-0.465997		5.21125	0.00558048		5.20792	-0.761181
	5.63044	3.0238		5.63044	3.04477		5.63044	3.02738		5.63044	3.10157			5.21458	0.0144914		5.21792	-0.46733		5.21792	0.00528246		5.21458	-0.761025
	5.63764	3.02416		5.63764	3.04433		5.63764	3.0265		5.63764	3.10157			5.22125	0.0147969		5.22458	-0.468299		5.22458	0.00539422		5.22125	-0.761159
	5.64484	3.02495		5.64484	3.04372		5.64484	3.02624		5.64484	3.10088			5.22792	0.0145808		5.23125	-0.469066		5.23125	0.00589341		5.22792	-0.761189
	5.65204	3.02589		5.65204	3.04306		5.65204	3.02694		5.65204	3.09954			5.23458	0.0138357		5.23792	-0.469543		5.23792	0.00657886		5.23458	-0.760838
	5.65924	3.02669		5.65924	3.04258		5.65924	3.02884		5.65924	3.09767			5.24125	0.0126138		5.24458	-0.469603		5.24458	0.00738353		5.24125	-0.760712
	5.66644	3.02724		5.66644	3.04267		5.66644	3.0319		5.66644	3.09542			5.24792	0.0114515		5.25125	-0.4692		5.25125	0.00795722		5.24792	-0.761054
	5.67364	3.02758		5.67364	3.04365		5.67364	3.03587		5.67364	3.09299			5.25458	0.010632		5.25792	-0.468962		5.25792	0.00808388		5.25458	-0.761546
	5.68084	3.02786		5.68084	3.04565		5.68084	3.04034		5.68084	3.09064			5.26125	0.00997633		5.26458	-0.469171		5.26458	0.00784546		5.26125	-0.762135
	5.68804	3.02821		5.68804	3.04856		5.68804	3.04489		5.68804	3.08862			5.26792	0.00973791		5.27125	-0.469774		5.27125	0.00717491		5.26792	-0.763036
	5.69524	3.02878		5.69524	3.05204		5.69524	3.04896		5.69524	3.08713			5.27458	0.0102147		5.27792	-0.470601		5.27792	0.0063628		5.27458	-0.764079
	5.70244	3.02981		5.70244	3.05561		5.70244	3.05203		5.70244	3.08632			5.28125	0.0111237		5.28458	-0.471391		5.28458	0.00542402		5.28125	-0.76469
	5.70964	3.03158		5.70964	3.05884		5.70964	3.05367		5.70964	3.0862			5.28792	0.0121593		5.29125	-0.472076		5.29125	0.00451505		5.28792	-0.764631
	5.71684	3.03427		5.71684	3.06136		5.71684	3.05372		5.71684	3.08672			5.29458	0.0132322		5.29792	-0.472456		5.29792	0.0038594		5.29458	-0.764467
	5.72404	3.03782		5.72404	3.06292		5.72404	3.05239		5.72404	3.08775			5.30125	0.0143722		5.30458	-0.472628		5.30458	0.00356138		5.30125	-0.764415
	5.73124	3.04192		5.73124	3.06346		5.73124	3.05007		5.73124	3.08912			5.30792	0.015229		5.31125	-0.472181		5.31125	0.00370294		5.30792	-0.764377
	5.73844	3.04614		5.73844	3.06311		5.73844	3.04717		5.73844	3.09067			5.31458	0.0154078		5.31792	-0.471197		5.31792	0.00395626		5.31458	-0.764251
	5.74564	3.05006		5.74564	3.06214		5.74564	3.04408		5.74564	3.09225			5.32125	0.0153705		5.32458	-0.470169		5.32458	0.00436604		5.32125	-0.764281
	5.75284	3.05333		5.75284	3.06094		5.75284	3.04116		5.75284	3.09372			5.32792	0.0150204		5.33125	-0.469685		5.33125	0.00473857		5.32792	-0.764728
	5.76004	3.05566		5.76004	3.05991		5.76004	3.03876		5.76004	3.09491			5.33458	0.0141561		5.33792	-0.469953		5.33792	0.00507385		5.33458	-0.765726
	5.76724	3.05693		5.76724	3.05927		5.76724	3.03718		5.76724	3.09567			5.34125	0.0131205		5.34458	-0.4704		5.34458	0.00514835		5.34125	-0.766911
	5.77444	3.05716		5.77444	3.05907		5.77444	3.03656		5.77444	3.09598			5.34792	0.0122339		5.35125	-0.470877		5.35125	0.00496954		5.34792	-0.768341
	5.78164	3.05656		5.78164	3.05918		5.78164	3.03684		5.78164	3.09595			5.35458	0.0118017		5.35792	-0.471115		5.35792	0.00479072		5.35458	-0.769928
	5.78884	3.05542		5.78884	3.05941		5.78884	3.03789		5.78884	3.09574			5.36125	0.0112057		5.36458	-0.470974		5.36458	0.00466406		5.36125	-0.771269
	5.79604	3.05403		5.79604	3.05957		5.79604	3.03954		5.79604	3.09554			5.36792	0.0105798		5.37125	-0.470497		5.37125	0.00478327		5.36792	-0.771873
	5.80324	3.0526		5.80324	3.05955		5.80324	3.04168		5.80324	3.09555			5.37458	0.0106022		5.37792	-0.46967		5.37792	0.0045523		5.37458	-0.771768
	5.81044	3.05124		5.81044	3.05926		5.81044	3.0441		5.81044	3.09595			5.38125	0.011228		5.38458	-0.46894		5.38458	0.00426918		5.38125	-0.77159
	5.81764	3.04993		5.81764	3.05871		5.81764	3.04652		5.81764	3.0969			5.38792	0.0120178		5.39125	-0.468768		5.39125	0.00420958		5.38792	-0.77112
	5.82484	3.04857		5.82484	3.05791		5.82484	3.04866		5.82484	3.09846			5.39458	0.0122935		5.39792	-0.469297		5.39792	0.00460446		5.39458	-0.770316
	5.83204	3.04712		5.83204	3.05691		5.83204	3.05039		5.83204	3.10052			5.40125	0.0125319		5.40458	-0.470094		5.40458	0.0051409		5.40125	-0.7696
	5.83924	3.04555		5.83924	3.05568		5.83924	3.0517		5.83924	3.1029			5.40792	0.0129715		5.41125	-0.470646		5.41125	0.00557303		5.40792	-0.76966
	5.84644	3.04393		5.84644	3.05418		5.84644	3.05266		5.84644	3.10538			5.41458	0.0131577		5.41792	-0.47119		5.41792	0.00647455		5.41458	-0.770248
	5.85364	3.04226		5.85364	3.05236		5.85364	3.05337		5.85364	3.10773			5.42125	0.012815		5.42458	-0.471883		5.42458	0.00745803		5.42125	-0.770561
	5.86084	3.04055		5.86084	3.05026		5.86084	3.05382		5.86084	3.10974			5.42792	0.012219		5.43125	-0.472277		5.43125	0.00822544		5.42792	-0.770889
	5.86804	3.03879		5.86804	3.04798		5.86804	3.05406		5.86804	3.11118			5.43458	0.0118613		5.43792	-0.471979		5.43792	0.008367		5.43458	-0.771269
	5.87524	3.03699		5.87524	3.04565		5.87524	3.05415		5.87524	3.11191			5.44125	0.0118613		5.44458	-0.47148		5.44458	0.00799447		5.44125	-0.771873
	5.88244	3.03517		5.88244	3.04343		5.88244	3.05414		5.88244	3.11185			5.44792	0.0120103		5.45125	-0.471346		5.45125	0.00746548		5.44792	-0.772454
	5.88964	3.03323		5.88964	3.04154		5.88964	3.05404		5.88964	3.11098			5.45458	0.0123233		5.45792	-0.471517		5.45792	0.00666082		5.45458	-0.773013
	5.89684	3.03106		5.89684	3.04028		5.89684	3.0538		5.89684	3.10934			5.46125	0.0124574		5.46458	-0.471927		5.46458	0.00618398		5.46125	-0.773601
	5.90404	3.0286		5.90404	3.03991		5.90404	3.05333		5.90404	3.10698			5.46792	0.0118911		5.47125	-0.472762		5.47125	0.00569969		5.46792	-0.773787
	5.91124	3.02597		5.91124	3.04044		5.91124	3.05269		5.91124	3.10405			5.47458	0.0110418		5.47792	-0.474006		5.47792	0.00520051		5.47458	-0.77381
	5.91844	3.02347		5.91844	3.0417		5.91844	3.05197		5.91844	3.10086			5.48125	0.010021		5.48458	-0.475317		5.48458	0.005126		5.48125	-0.773765
	5.92564	3.02147		5.92564	3.04338		5.92564	3.05135		5.92564	3.09777			5.48792	0.00911951		5.49125	-0.476196		5.49125	0.00553578		5.48792	-0.773728
	5.93284	3.02027		5.93284	3.0453		5.93284	3.05097		5.93284	3.09512			5.49458	0.00835955		5.49792	-0.476763		5.49792	0.00629574		5.49458	-0.773728
	5.94004	3.02006		5.94004	3.04729		5.94004	3.05094		5.94004	3.09324			5.50125	0.00824779		5.50458	-0.476666		5.50458	0.00661612		5.50125	-0.773482
	5.94724	3.02086		5.94724	3.04928		5.94724	3.05131		5.94724	3.09241			5.50792	0.00913441		5.51125	-0.476159		5.51125	0.00678003		5.50792	-0.773631
	5.95444	3.02255		5.95444	3.05119		5.95444	3.0521		5.95444	3.09281			5.51458	0.010401		5.51792	-0.475325		5.51792	0.00690669		5.51458	-0.774719
	5.96164	3.02487		5.96164	3.05296		5.96164	3.05328		5.96164	3.09445			5.52125	0.0114366		5.52458	-0.474162		5.52458	0.00677258		5.52125	-0.776298
	5.96884	3.02742		5.96884	3.05469		5.96884	3.05467		5.96884	3.09712			5.52792	0.0118837		5.53125	-0.472926		5.53125	0.00610203		5.52792	-0.777371
	5.97604	3.02972		5.97604	3.05652		5.97604	3.05597		5.97604	3.10042			5.53458	0.0117049		5.53792	-0.471845		5.53792	0.00519305		5.53458	-0.777513
	5.98324	3.03133		5.98324	3.05859		5.98324	3.05684		5.98324	3.10397			5.54125	0.0115559		5.54458	-0.471108		5.54458	0.00455976		5.54125	-0.777707
	5.99044	3.03205		5.99044	3.06083		5.99044	3.05694		5.99044	3.10742			5.54792	0.0116825		5.55125	-0.470549		5.55125	0.00461191		5.54792	-0.778146
	5.99764	3.0319		5.99764	3.06302		5.99764	3.05612		5.99764	3.11055			5.55458	0.012055		5.55792	-0.470519		5.55792	0.00507385		5.55458	-0.77837
	6.00484	3.03116		6.00484	3.06489		6.00484	3.05433		6.00484	3.11311			5.56125	0.0124797		5.56458	-0.471354		5.56458	0.00561774		5.56125	-0.778265
	6.01204	3.03025		6.01204	3.06622		6.01204	3.0517		6.01204	3.11493			5.56792	0.0130832		5.57125	-0.472851		5.57125	0.00600517		5.56792	-0.778697
	6.01924	3.02954		6.01924	3.06683		6.01924	3.04847		6.01924	3.11595			5.57458	0.0142008		5.57792	-0.474192		5.57792	0.00627339		5.57458	-0.779733
	6.02644	3.0293		6.02644	3.06664		6.02644	3.04497		6.02644	3.1162			5.58125	0.0150055		5.58458	-0.47534		5.58458	0.0063628		5.58125	-0.78097
	6.03364	3.02965		6.03364	3.06559		6.03364	3.0416		6.03364	3.11587			5.58792	0.0152439		5.59125	-0.476256		5.59125	0.00570714		5.58792	-0.781842
	6.04084	3.03062		6.04084	3.06373		6.04084	3.0388		6.04084	3.11509			5.59458	0.0151023		5.59792	-0.477068		5.59792	0.00460446		5.59458	-0.782616
	6.04804	3.03209		6.04804	3.0613		6.04804	3.03686		6.04804	3.11392			5.60125	0.0151917		5.60458	-0.477768		5.60458	0.0038147		5.60125	-0.783309
	6.05524	3.03382		6.05524	3.05869		6.05524	3.03582		6.05524	3.11242			5.60792	0.0152588		5.61125	-0.478387		5.61125	0.00399351		5.60792	-0.783369
	6.06244	3.0354		6.06244	3.05632		6.06244	3.03556		6.06244	3.11068			5.61458	0.0146329		5.61792	-0.479043		5.61792	0.00445545		5.61458	-0.782929
	6.06964	3.03645		6.06964	3.05452		6.06964	3.03585		6.06964	3.10879			5.62125	0.0138879		5.62458	-0.479653		5.62458	0.00464916		5.62125	-0.782341
	6.07684	3.0367		6.07684	3.05347		6.07684	3.03648		6.07684	3.10687			5.62792	0.0135079		5.63125	-0.479952		5.63125	0.00471622		5.62792	-0.782244
	6.08404	3.03606		6.08404	3.05327		6.08404	3.0373		6.08404	3.105			5.63458	0.0133365		5.63792	-0.479929		5.63792	0.00523031		5.63458	-0.782445
	6.09124	3.03459		6.09124	3.05391		6.09124	3.03816		6.09124	3.10327			5.64125	0.0129938		5.64458	-0.479475		5.64458	0.00593066		5.64125	-0.782445
	6.09844	3.03234		6.09844	3.05537		6.09844	3.03894		6.09844	3.1018			5.64792	0.0127479		5.65125	-0.47861		5.65125	0.00619143		5.64792	-0.782512
	6.10564	3.02944		6.10564	3.05743		6.10564	3.03958		6.10564	3.10068			5.65458	0.0133961		5.65792	-0.477619		5.65792	0.00619888		5.65458	-0.783019
	6.11284	3.02607		6.11284	3.05976		6.11284	3.04016		6.11284	3.09997			5.66125	0.0143796		5.66458	-0.476778		5.66458	0.00631064		5.66125	-0.783905
	6.12004	3.02259		6.12004	3.06196		6.12004	3.04088		6.12004	3.0997			5.66792	0.0149906		5.67125	-0.476532		5.67125	0.00674278		5.66792	-0.784606
	6.12724	3.01943		6.12724	3.06371		6.12724	3.04186		6.12724	3.09994			5.67458	0.0151768		5.67792	-0.476733		5.67792	0.00686944		5.67458	-0.784688
	6.13444	3.01703		6.13444	3.0648		6.13444	3.04315		6.13444	3.10084			5.68125	0.0152439		5.68458	-0.477076		5.68458	0.00629574		5.68125	-0.784725
	6.14164	3.01564		6.14164	3.06505		6.14164	3.04465		6.14164	3.10251			5.68792	0.0152662		5.69125	-0.47785		5.69125	0.00517815		5.68792	-0.784993
	6.14884	3.0154		6.14884	3.06438		6.14884	3.04629		6.14884	3.10489			5.69458	0.0148788		5.69792	-0.478618		5.69792	0.00397116		5.69458	-0.785239
	6.15604	3.01633		6.15604	3.06287		6.15604	3.04804		6.15604	3.10771			5.70125	0.0142679		5.70458	-0.478916		5.70458	0.00324845		5.70125	-0.785053
	6.16324	3.01834		6.16324	3.06079		6.16324	3.0499		6.16324	3.1106			5.70792	0.0134483		5.71125	-0.478528		5.71125	0.00301749		5.70792	-0.784561
	6.17044	3.02123		6.17044	3.05855		6.17044	3.05184		6.17044	3.11319			5.71458	0.0126585		5.71792	-0.47791		5.71792	0.0031814		5.71458	-0.784174
	6.17764	3.02468		6.17764	3.05659		6.17764	3.05368		6.17764	3.11509			5.72125	0.0120327		5.72458	-0.477664		5.72458	0.0038147		5.72125	-0.784054
	6.18484	3.02832		6.18484	3.05515		6.18484	3.05521		6.18484	3.1159			5.72792	0.0116378		5.73125	-0.477493		5.73125	0.00488758		5.72792	-0.78395
	6.19204	3.03176		6.19204	3.05436		6.19204	3.05627		6.19204	3.11523			5.73458	0.0116378		5.73792	-0.477612		5.73792	0.00610203		5.73458	-0.783615
	6.19924	3.03479		6.19924	3.05424		6.19924	3.05681		6.19924	3.11292			5.74125	0.0117496		5.74458	-0.478201		5.74458	0.00717491		5.74125	-0.783347
	6.20644	3.03738		6.20644	3.05469		6.20644	3.05691		6.20644	3.10916			5.74792	0.0123531		5.75125	-0.478983		5.75125	0.00780076		5.74792	-0.783272
	6.21364	3.03959		6.21364	3.05548		6.21364	3.05665		6.21364	3.10448			5.75458	0.0132769		5.75792	-0.479192		5.75792	0.00819564		5.75458	-0.78319
	6.22084	3.04154		6.22084	3.05625		6.22084	3.05609		6.22084	3.09952			5.76125	0.0140741		5.76458	-0.478864		5.76458	0.00820309		5.76125	-0.783019
	6.22804	3.04328		6.22804	3.05674		6.22804	3.05538		6.22804	3.09484			5.76792	0.0145063		5.77125	-0.478566		5.77125	0.00814348		5.76792	-0.782855
	6.23524	3.04486		6.23524	3.05685		6.23524	3.05477		6.23524	3.09083			5.77458	0.0145733		5.77792	-0.478536		5.77792	0.00829995		5.77458	-0.783287
	6.24244	3.04625		6.24244	3.05674		6.24244	3.05457		6.24244	3.08776			5.78125	0.0145212		5.78458	-0.478342		5.78458	0.00853837		5.78125	-0.784025
	6.24964	3.04738		6.24964	3.05664		6.24964	3.05493		6.24964	3.08582			5.78792	0.0139698		5.79125	-0.478096		5.79125	0.00886619		5.78792	-0.784315
	6.25684	3.04812		6.25684	3.05677		6.25684	3.05581		6.25684	3.08496			5.79458	0.0131577		5.79792	-0.478372		5.79792	0.0089258		5.79458	-0.784211
	6.26404	3.04832		6.26404	3.0573		6.26404	3.05697		6.26404	3.085			5.80125	0.0126213		5.80458	-0.478908		5.80458	0.0090301		5.80125	-0.784136
	6.27124	3.04793		6.27124	3.05831		6.27124	3.05816		6.27124	3.08554			5.80792	0.0125989		5.81125	-0.47902		5.81125	0.00902265		5.80792	-0.784457
	6.27844	3.04703		6.27844	3.05984		6.27844	3.05918		6.27844	3.08628			5.81458	0.0129938		5.81792	-0.478715		5.81792	0.00891834		5.81458	-0.784762
	6.28564	3.04583		6.28564	3.06169		6.28564	3.05994		6.28564	3.08709			5.82125	0.0139102		5.82458	-0.478797		5.82458	0.00838935		5.82125	-0.784703
	6.29284	3.04458		6.29284	3.06345		6.29284	3.06037		6.29284	3.08802			5.82792	0.0154227		5.83125	-0.479512		5.83125	0.00780821		5.82792	-0.784695
	6.30004	3.04353		6.30004	3.0646		6.30004	3.06044		6.30004	3.08916			5.83458	0.0167638		5.83792	-0.480339		5.83792	0.00759959		5.83458	-0.78477
	6.30724	3.04289		6.30724	3.06469		6.30724	3.06023		6.30724	3.09049			5.84125	0.017494		5.84458	-0.481002		5.84458	0.00801682		5.84125	-0.78474
	6.31444	3.04285		6.31444	3.06352		6.31444	3.06001		6.31444	3.09191			5.84792	0.0178292		5.85125	-0.481844		5.85125	0.00865012		5.84792	-0.784241
	6.32164	3.04339		6.32164	3.0611		6.32164	3.0601		6.32164	3.0933			5.85458	0.0180528		5.85792	-0.482939		5.85792	0.00894815		5.85458	-0.783272
	6.32884	3.04435		6.32884	3.05764		6.32884	3.06073		6.32884	3.09451			5.86125	0.01771		5.86458	-0.483766		5.86458	0.00894815		5.86125	-0.782631
	6.33604	3.04542		6.33604	3.0534		6.33604	3.06193		6.33604	3.09536			5.86792	0.0170246		5.87125	-0.484154		5.87125	0.00844896		5.86792	-0.782453
	6.34324	3.04633		6.34324	3.04881		6.34324	3.06352		6.34324	3.09564			5.87458	0.0164434		5.87792	-0.484191		5.87792	0.00791252		5.87458	-0.782855
	6.35044	3.04701		6.35044	3.04445		6.35044	3.06531		6.35044	3.09523			5.88125	0.016138		5.88458	-0.484027		5.88458	0.00730157		5.88125	-0.783049
	6.35764	3.04747		6.35764	3.0409		6.35764	3.06709		6.35764	3.09414			5.88792	0.0156835		5.89125	-0.48361		5.89125	0.0070855		5.88792	-0.783004
	6.36484	3.04785		6.36484	3.0386		6.36484	3.06872		6.36484	3.09253			5.89458	0.0148937		5.89792	-0.482775		5.89792	0.00720471		5.89458	-0.783071
	6.37204	3.04828		6.37204	3.0377		6.37204	3.07003		6.37204	3.09067			5.90125	0.01432		5.90458	-0.481956		5.90458	0.00777096		5.90125	-0.78316
	6.37924	3.04891		6.37924	3.03809		6.37924	3.07098		6.37924	3.08881			5.90792	0.0139847		5.91125	-0.481419		5.91125	0.00890344		5.90792	-0.783354
	6.38644	3.0499		6.38644	3.03952		6.38644	3.07158		6.38644	3.08717			5.91458	0.0140294		5.91792	-0.481494		5.91792	0.00999868		5.91458	-0.783034
	6.39364	3.0513		6.39364	3.04166		6.39364	3.07199		6.39364	3.08596			5.92125	0.0141039		5.92458	-0.482194		5.92458	0.0108108		5.92125	-0.782572
	6.40084	3.05302		6.40084	3.04415		6.40084	3.07242		6.40084	3.08529			5.92792	0.0140443		5.93125	-0.483014		5.93125	0.0112653		5.92792	-0.782147
	6.40804	3.05475		6.40804	3.04659		6.40804	3.07299		6.40804	3.08514			5.93458	0.0139475		5.93792	-0.483766		5.93792	0.0116155		5.93458	-0.781856
	6.41524	3.05606		6.41524	3.04863		6.41524	3.07376		6.41524	3.08537			5.94125	0.0137687		5.94458	-0.484183		5.94458	0.0117719		5.94125	-0.781551
	6.42244	3.05648		6.42244	3.05011		6.42244	3.07466		6.42244	3.08585			5.94792	0.0136793		5.95125	-0.484414		5.95125	0.0112355		5.94792	-0.781238
	6.42964	3.05578		6.42964	3.05108		6.42964	3.0755		6.42964	3.08645			5.95458	0.013411		5.95792	-0.484347		5.95792	0.0102445		5.95458	-0.781357
	6.43684	3.05394		6.43684	3.0517		6.43684	3.07603		6.43684	3.08714			5.96125	0.0130758		5.96458	-0.483841		5.96458	0.00914931		5.96125	-0.78214
	6.44404	3.05119		6.44404	3.05219		6.44404	3.07604		6.44404	3.08789			5.96792	0.012666		5.97125	-0.483103		5.97125	0.00837445		5.96792	-0.783272
	6.45124	3.04793		6.45124	3.05284		6.45124	3.07534		6.45124	3.08863			5.97458	0.0120774		5.97792	-0.482716		5.97792	0.0082925		5.97458	-0.784487
	6.45844	3.04459		6.45844	3.05386		6.45844	3.07387		6.45844	3.08933			5.98125	0.0114813		5.98458	-0.482984		5.98458	0.00880659		5.98125	-0.785731
	6.46564	3.04164		6.46564	3.05542		6.46564	3.07167		6.46564	3.09001			5.98792	0.0107139		5.99125	-0.48358		5.99125	0.00998378		5.98792	-0.786558
	6.47284	3.03953		6.47284	3.05754		6.47284	3.06899		6.47284	3.09077			5.99458	0.0100806		5.99792	-0.484005		5.99792	0.0113621		5.99458	-0.787102
	6.48004	3.03864		6.48004	3.06016		6.48004	3.0661		6.48004	3.09167			6.00125	0.00979006		6.00458	-0.484072		6.00458	0.0129193		6.00125	-0.787355
	6.48724	3.03915		6.48724	3.06322		6.48724	3.06333		6.48724	3.09271			6.00792	0.0100061		6.01125	-0.483967		6.01125	0.0140965		6.00792	-0.787467
	6.49444	3.04096		6.49444	3.06659		6.49444	3.06096		6.49444	3.09379			6.01458	0.0104234		6.01792	-0.483595		6.01792	0.0143275		6.01458	-0.786982
	6.50164	3.04379		6.50164	3.07004		6.50164	3.05913		6.50164	3.09483			6.02125	0.0107214		6.02458	-0.483364		6.02458	0.014171		6.02125	-0.78617
	6.50884	3.04721		6.50884	3.07318		6.50884	3.05791		6.50884	3.09577			6.02792	0.0109524		6.03125	-0.483423		6.03125	0.01394		6.02792	-0.786006
	6.51604	3.05079		6.51604	3.07558		6.51604	3.05725		6.51604	3.09659			6.03458	0.0111833		6.03792	-0.483774		6.03792	0.0140145		6.03458	-0.786684
	6.52324	3.05414		6.52324	3.07692		6.52324	3.05703		6.52324	3.09727			6.04125	0.0115484		6.04458	-0.484191		6.04458	0.013791		6.04125	-0.787511
	6.53044	3.05697		6.53044	3.07711		6.53044	3.05704		6.53044	3.09774			6.04792	0.0123531		6.05125	-0.484779		6.05125	0.0134706		6.04792	-0.787988
	6.53764	3.0591		6.53764	3.0762		6.53764	3.05711		6.53764	3.09793			6.05458	0.0137091		6.05792	-0.485599		6.05792	0.0134408		6.05458	-0.78842
	6.54484	3.06047		6.54484	3.07436		6.54484	3.05715		6.54484	3.09784			6.06125	0.0154823		6.06458	-0.486173		6.06458	0.0135228		6.06125	-0.788897
	6.55204	3.06111		6.55204	3.07187		6.55204	3.05716		6.55204	3.09746			6.06792	0.0173151		6.07125	-0.48627		6.07125	0.0135303		6.06792	-0.789233
	6.55924	3.06109		6.55924	3.06916		6.55924	3.05717		6.55924	3.09685			6.07458	0.0188649		6.07792	-0.486381		6.07792	0.0133738		6.07458	-0.789545
	6.56644	3.06053		6.56644	3.06672		6.56644	3.05717		6.56644	3.09598			6.08125	0.0197962		6.08458	-0.486992		6.08458	0.0132471		6.08125	-0.790015
	6.57364	3.0596		6.57364	3.06495		6.57364	3.05716		6.57364	3.09478			6.08792	0.019975		6.09125	-0.48779		6.09125	0.0135377		6.08792	-0.79044
	6.58084	3.05848		6.58084	3.06395		6.58084	3.05716		6.58084	3.09319			6.09458	0.0198111		6.09792	-0.48802		6.09792	0.0142828		6.09458	-0.790834
	6.58804	3.05718		6.58804	3.06357		6.58804	3.05729		6.58804	3.09122			6.10125	0.0193715		6.10458	-0.487439		6.10458	0.0151247		6.10125	-0.79146
	6.59524	3.05563		6.59524	3.06359		6.59524	3.05761		6.59524	3.08899			6.10792	0.0189245		6.11125	-0.486664		6.11125	0.0158548		6.10792	-0.792414
	6.60244	3.05378		6.60244	3.06374		6.60244	3.05817		6.60244	3.08676			6.11458	0.0183731		6.11792	-0.485793		6.11792	0.0163764		6.11458	-0.793226
	6.60964	3.05175		6.60964	3.06382		6.60964	3.05896		6.60964	3.08482			6.12125	0.0179783		6.12458	-0.48466		6.12458	0.0169277		6.12125	-0.793949
	6.61684	3.04978		6.61684	3.06368		6.61684	3.06007		6.61684	3.08351			6.12792	0.0175983		6.13125	-0.483468		6.13125	0.0169575		6.12792	-0.794835
	6.62404	3.04815		6.62404	3.06329		6.62404	3.06156		6.62404	3.08314			6.13458	0.0174791		6.13792	-0.482947		6.13792	0.0165403		6.13458	-0.7957
	6.63124	3.04706		6.63124	3.06283		6.63124	3.06345		6.63124	3.08385			6.14125	0.0175536		6.14458	-0.48323		6.14458	0.0162348		6.14125	-0.796005
	6.63844	3.04666		6.63844	3.06265		6.63844	3.06562		6.63844	3.08555			6.14792	0.0174716		6.15125	-0.483595		6.15125	0.0162646		6.14792	-0.795521
	6.64564	3.04706		6.64564	3.06309		6.64564	3.06779		6.64564	3.08792			6.15458	0.0176132		6.15792	-0.483803		6.15792	0.0165924		6.15458	-0.794657
	6.65284	3.04833		6.65284	3.06436		6.65284	3.06967		6.65284	3.09055			6.16125	0.0181794		6.16458	-0.484161		6.16458	0.0168905		6.16125	-0.793986
	6.66004	3.05037		6.66004	3.06641		6.66004	3.07107		6.66004	3.09299			6.16792	0.0189841		6.17125	-0.484787		6.17125	0.0174269		6.16792	-0.793844
	6.66724	3.05287		6.66724	3.069		6.66724	3.07187		6.66724	3.09485			6.17458	0.0189394		6.17792	-0.485353		6.17792	0.0178143		6.17458	-0.794098
	6.67444	3.05536		6.67444	3.07173		6.67444	3.07206		6.67444	3.09587			6.18125	0.0179857		6.18458	-0.485845		6.18458	0.0177398		6.18125	-0.794642
	6.68164	3.05733		6.68164	3.07412		6.68164	3.07168		6.68164	3.09602			6.18792	0.0169799		6.19125	-0.486337		6.19125	0.0174567		6.18792	-0.79532
	6.68884	3.05833		6.68884	3.07567		6.68884	3.07089		6.68884	3.09551			6.19458	0.0165775		6.19792	-0.48691		6.19792	0.0173226		6.19458	-0.795998
	6.69604	3.058		6.69604	3.07583		6.69604	3.06997		6.69604	3.09478			6.20125	0.0163391		6.20458	-0.487573		6.20458	0.0173301		6.20125	-0.796668
	6.70324	3.05612		6.70324	3.07429		6.70324	3.06925		6.70324	3.09426			6.20792	0.0159815		6.21125	-0.488169		6.21125	0.0169128		6.20792	-0.797547
	6.71044	3.05267		6.71044	3.07098		6.71044	3.069		6.71044	3.09427			6.21458	0.0158027		6.21792	-0.488736		6.21792	0.0162646		6.21458	-0.798807
	6.71764	3.04784		6.71764	3.06614		6.71764	3.06932		6.71764	3.09494			6.22125	0.0160709		6.22458	-0.489242		6.22458	0.015758		6.22125	-0.800371
	6.72484	3.04202		6.72484	3.06025		6.72484	3.07008		6.72484	3.09619			6.22792	0.0168234		6.23125	-0.489824		6.23125	0.0155643		6.22792	-0.801831
	6.73204	3.03572		6.73204	3.05386		6.73204	3.07102		6.73204	3.09783			6.23458	0.0172853		6.23792	-0.490315		6.23792	0.0154078		6.23458	-0.802971
	6.73924	3.02957		6.73924	3.04759		6.73924	3.07182		6.73924	3.09958			6.24125	0.0175163		6.24458	-0.490464		6.24458	0.0153556		6.24125	-0.803642
	6.74644	3.0242		6.74644	3.042		6.74644	3.07229		6.74644	3.10115			6.24792	0.0178888		6.25125	-0.490479		6.25125	0.0157505		6.24792	-0.804193
	6.75364	3.02025		6.75364	3.03762		6.75364	3.07233		6.75364	3.10232			6.25458	0.0186861		6.25792	-0.490524		6.25792	0.016287		6.25458	-0.804715
	6.76084	3.01819		6.76084	3.03481		6.76084	3.07195		6.76084	3.10301			6.26125	0.0196695		6.26458	-0.490591		6.26458	0.0166222		6.26125	-0.805326
	6.76804	3.01818		6.76804	3.0337		6.76804	3.07122		6.76804	3.10329			6.26792	0.0202805		6.27125	-0.49042		6.27125	0.0163391		6.26792	-0.805803
	6.77524	3.02011		6.77524	3.03419		6.77524	3.07031		6.77524	3.10326			6.27458	0.0203252		6.27792	-0.490159		6.27792	0.0158623		6.27458	-0.806496
	6.78244	3.02368		6.78244	3.03601		6.78244	3.06941		6.78244	3.10298			6.28125	0.0198931		6.28458	-0.490084		6.28458	0.0155494		6.28125	-0.807539
	6.78964	3.02836		6.78964	3.03885		6.78964	3.06877		6.78964	3.1025			6.28792	0.0191331		6.29125	-0.490174		6.29125	0.0156611		6.28792	-0.808388
	6.79684	3.03354		6.79684	3.04241		6.79684	3.06851		6.79684	3.10187			6.29458	0.0182092		6.29792	-0.489831		6.29792	0.0162646		6.29458	-0.808574
	6.80404	3.0385		6.80404	3.04639		6.80404	3.06863		6.80404	3.10117			6.30125	0.0171512		6.30458	-0.489168		6.30458	0.0170767		6.30125	-0.80803
	6.81124	3.04257		6.81124	3.05046		6.81124	3.06892		6.81124	3.10046			6.30792	0.0160262		6.31125	-0.488847		6.31125	0.0179335		6.30792	-0.807807
	6.81844	3.04533		6.81844	3.05428		6.81844	3.06908		6.81844	3.09975			6.31458	0.0153109		6.31792	-0.488855		6.31792	0.0188202		6.31458	-0.807904
	6.82564	3.04664		6.82564	3.05762		6.82564	3.06886		6.82564	3.09912			6.32125	0.0151917		6.32458	-0.489049		6.32458	0.0195652		6.32125	-0.80812
	6.83284	3.04661		6.83284	3.06033		6.83284	3.06809		6.83284	3.09876			6.32792	0.0156686		6.33125	-0.488773		6.33125	0.0199005		6.32792	-0.808507
	6.84004	3.04552		6.84004	3.06231		6.84004	3.06666		6.84004	3.09889			6.33458	0.0162721		6.33792	-0.48878		6.33792	0.0197142		6.33458	-0.80929
	6.84724	3.04372		6.84724	3.06343		6.84724	3.06458		6.84724	3.09964			6.34125	0.0166818		6.34458	-0.489041		6.34458	0.0192523		6.34125	-0.810549
	6.85444	3.04165		6.85444	3.06367		6.85444	3.06193		6.85444	3.10091			6.34792	0.0167936		6.35125	-0.48925		6.35125	0.0191778		6.34792	-0.811704
	6.86164	3.03969		6.86164	3.06315		6.86164	3.0589		6.86164	3.1024			6.35458	0.0167042		6.35792	-0.489444		6.35792	0.0192448		6.35458	-0.812672
	6.86884	3.03808		6.86884	3.06213		6.86884	3.05575		6.86884	3.10378			6.36125	0.0165403		6.36458	-0.489697		6.36458	0.0194982		6.36125	-0.813074
	6.87604	3.03691		6.87604	3.06086		6.87604	3.05276		6.87604	3.10482			6.36792	0.0160784		6.37125	-0.490464		6.37125	0.0197291		6.36792	-0.812694
	6.88324	3.03612		6.88324	3.05954		6.88324	3.05024		6.88324	3.10533			6.37458	0.0156686		6.37792	-0.49112		6.37792	0.0200868		6.37458	-0.811942
	6.89044	3.03568		6.89044	3.05832		6.89044	3.04843		6.89044	3.10516			6.38125	0.0158474		6.38458	-0.49153		6.38458	0.0204742		6.38125	-0.811264
	6.89764	3.03553		6.89764	3.05727		6.89764	3.04741		6.89764	3.10419			6.38792	0.0166222		6.39125	-0.491858		6.39125	0.0204295		6.38792	-0.810996
	6.90484	3.0356		6.90484	3.05646		6.90484	3.04719		6.90484	3.10246			6.39458	0.0172928		6.39792	-0.492096		6.39792	0.0199452		6.39458	-0.811048
	6.91204	3.03575		6.91204	3.05587		6.91204	3.04766		6.91204	3.10022			6.40125	0.0172853		6.40458	-0.491947		6.40458	0.0191778		6.40125	-0.811748
	6.91924	3.03581		6.91924	3.05542		6.91924	3.04875		6.91924	3.09784			6.40792	0.0168979		6.41125	-0.491403		6.41125	0.0184253		6.40792	-0.813372
	6.92644	3.03574		6.92644	3.05506		6.92644	3.05036		6.92644	3.09575			6.41458	0.0163093		6.41792	-0.490911		6.41792	0.017859		6.41458	-0.815451
	6.93364	3.03553		6.93364	3.05482		6.93364	3.05223		6.93364	3.09426			6.42125	0.0157431		6.42458	-0.490859		6.42458	0.0174567		6.42125	-0.817426
	6.94084	3.03515		6.94084	3.05477		6.94084	3.05403		6.94084	3.09352			6.42792	0.0151843		6.43125	-0.490926		6.43125	0.0175163		6.42792	-0.818893
	6.94804	3.03456		6.94804	3.05497		6.94804	3.0555		6.94804	3.09364			6.43458	0.0147149		6.43792	-0.490829		6.43792	0.0178665		6.43458	-0.819623
	6.95524	3.03375		6.95524	3.05537		6.95524	3.05647		6.95524	3.09464			6.44125	0.0143424		6.44458	-0.490755		6.44458	0.0180975		6.44125	-0.819795
	6.96244	3.03281		6.96244	3.05587		6.96244	3.057		6.96244	3.09652			6.44792	0.0142679		6.45125	-0.490703		6.45125	0.0182316		6.44792	-0.819534
	6.96964	3.03198		6.96964	3.0564		6.96964	3.05718		6.96964	3.09915			6.45458	0.0144616		6.45792	-0.49036		6.45792	0.0181347		6.45458	-0.819556
	6.97684	3.0315		6.97684	3.05686		6.97684	3.0571		6.97684	3.10221			6.46125	0.0145584		6.46458	-0.48957		6.46458	0.0181571		6.46125	-0.81975
	6.98404	3.03152		6.98404	3.05707		6.98404	3.05688		6.98404	3.10526			6.46792	0.0143647		6.47125	-0.488751		6.47125	0.017859		6.46792	-0.820063
	6.99124	3.03206		6.99124	3.05679		6.99124	3.05673		6.99124	3.10789			6.47458	0.0142157		6.47792	-0.488415		6.47792	0.0171512		6.47458	-0.820696
	6.99844	3.03299		6.99844	3.05586		6.99844	3.05681		6.99844	3.10981			6.48125	0.0144765		6.48458	-0.488773		6.48458	0.016287		6.48125	-0.821725
	7.00564	3.0342		7.00564	3.05433		7.00564	3.05718		7.00564	3.11089			6.48792	0.0148714		6.49125	-0.489458		6.49125	0.0151917		6.48792	-0.822827
	7.01284	3.03556		7.01284	3.05241		7.01284	3.05769		7.01284	3.11112			6.49458	0.0149682		6.49792	-0.490449		6.49792	0.0141785		6.49458	-0.823431
	7.02004	3.0369		7.02004	3.05039		7.02004	3.05809		7.02004	3.11056			6.50125	0.0144914		6.50458	-0.491507		6.50458	0.0133067		6.50125	-0.823893
	7.02724	3.03804		7.02724	3.04855		7.02724	3.05815		7.02724	3.10929			6.50792	0.0137687		6.51125	-0.492536		6.51125	0.0129268		6.50792	-0.8246
	7.03445	3.03882		7.03445	3.04717		7.03445	3.05775		7.03445	3.10759			6.51458	0.0131652		6.51792	-0.493065		6.51792	0.0133514		6.51458	-0.825509
	7.04165	3.0392		7.04165	3.04655		7.04165	3.0569		7.04165	3.1058			6.52125	0.012815		6.52458	-0.492588		6.52458	0.0142008		6.52125	-0.826448
	7.04885	3.03925		7.04885	3.04691		7.04885	3.05575		7.04885	3.10423			6.52792	0.0127107		6.53125	-0.491545		6.53125	0.0152439		6.52792	-0.827529
	7.05605	3.03909		7.05605	3.04832		7.05605	3.05456		7.05605	3.10299			6.53458	0.0128299		6.53792	-0.490732		6.53792	0.0161007		6.53458	-0.828557
	7.06325	3.03881		7.06325	3.05062		7.06325	3.05365		7.06325	3.10202			6.54125	0.0134036		6.54458	-0.490651		6.54458	0.0164732		6.54125	-0.829108
	7.07045	3.03838		7.07045	3.05349		7.07045	3.05328		7.07045	3.10119			6.54792	0.0146255		6.55125	-0.491358		6.55125	0.0164509		6.54792	-0.829011
	7.07765	3.03771		7.07765	3.05656		7.07765	3.05364		7.07765	3.10045			6.55458	0.0163391		6.55792	-0.492878		6.55792	0.0158101		6.55458	-0.828765
	7.08485	3.03671		7.08485	3.05949		7.08485	3.05469		7.08485	3.09977			6.56125	0.0176951		6.56458	-0.495106		6.56458	0.0150725		6.56125	-0.828624
	7.09205	3.03535		7.09205	3.06203		7.09205	3.05631		7.09205	3.0991			6.56792	0.0182167		6.57125	-0.497319		6.57125	0.0144467		6.56792	-0.828385
	7.09925	3.03375		7.09925	3.064		7.09925	3.05822		7.09925	3.09843			6.57458	0.0181794		6.57792	-0.498764		6.57792	0.0142306		6.57458	-0.828013
	7.10645	3.03202		7.10645	3.06534		7.10645	3.06011		7.10645	3.09786			6.58125	0.0181794		6.58458	-0.49939		6.58458	0.0142753		6.58125	-0.827767
	7.11365	3.03037		7.11365	3.06602		7.11365	3.06168		7.11365	3.09764			6.58792	0.0180826		6.59125	-0.498965		6.59125	0.0141859		6.58792	-0.828251
	7.12085	3.02895		7.12085	3.0661		7.12085	3.0628		7.12085	3.09806			6.59458	0.0174269		6.59792	-0.497751		6.59792	0.0141487		6.59458	-0.829116
	7.12805	3.02794		7.12805	3.06574		7.12805	3.06352		7.12805	3.09927			6.60125	0.0164956		6.60458	-0.496261		6.60458	0.0143945		6.60125	-0.829905
	7.13525	3.02755		7.13525	3.06512		7.13525	3.06407		7.13525	3.10128			6.60792	0.0159964		6.61125	-0.495195		6.61125	0.0148937		6.60792	-0.830196
	7.14245	3.02794		7.14245	3.06441		7.14245	3.06464		7.14245	3.10392			6.61458	0.0160336		6.61792	-0.494592		6.61792	0.0153705		6.61458	-0.830054
	7.14965	3.02915		7.14965	3.06366		7.14965	3.0654		7.14965	3.10695			6.62125	0.0162497		6.62458	-0.494078		6.62458	0.0158027		6.62125	-0.829808
	7.15685	3.03106		7.15685	3.06287		7.15685	3.06633		7.15685	3.11009			6.62792	0.0163391		6.63125	-0.49381		6.63125	0.0166818		6.62792	-0.829361
	7.16405	3.03341		7.16405	3.06202		7.16405	3.06735		7.16405	3.11297			6.63458	0.0165775		6.63792	-0.493921		6.63792	0.0177845		6.63458	-0.828847
	7.17125	3.03599		7.17125	3.06119		7.17125	3.06839		7.17125	3.1152			6.64125	0.0171959		6.64458	-0.494391		6.64458	0.0186339		6.64125	-0.828378
	7.17845	3.03863		7.17845	3.06051		7.17845	3.06942		7.17845	3.11645			6.64792	0.0176951		6.65125	-0.494801		6.65125	0.0193268		6.64792	-0.8284
	7.18565	3.04118		7.18565	3.06008		7.18565	3.0704		7.18565	3.11654			6.65458	0.0175387		6.65792	-0.495166		6.65792	0.0199154		6.65458	-0.829063
	7.19285	3.04344		7.19285	3.05995		7.19285	3.07127		7.19285	3.11545			6.66125	0.0165328		6.66458	-0.49565		6.66458	0.0201985		6.66125	-0.830367
	7.20005	3.0452		7.20005	3.06013		7.20005	3.07204		7.20005	3.11337			6.66792	0.0154451		6.67125	-0.496455		6.67125	0.019826		6.66792	-0.831962
	7.20725	3.04628		7.20725	3.06066		7.20725	3.07283		7.20725	3.1106			6.67458	0.0143051		6.67792	-0.497103		6.67792	0.0189692		6.67458	-0.833414
	7.21445	3.0466		7.21445	3.06154		7.21445	3.0739		7.21445	3.10744			6.68125	0.0134259		6.68458	-0.497527		6.68458	0.0181124		6.68125	-0.834756
	7.22165	3.04615		7.22165	3.06272		7.22165	3.07545		7.22165	3.10419			6.68792	0.0130013		6.69125	-0.498414		6.69125	0.0174344		6.68792	-0.836261
	7.22885	3.045		7.22885	3.06405		7.22885	3.07747		7.22885	3.10109			6.69458	0.013575		6.69792	-0.499927		6.69792	0.0170097		6.69458	-0.837758
	7.23605	3.04323		7.23605	3.06538		7.23605	3.07975		7.23605	3.09838			6.70125	0.0147		6.70458	-0.501305		6.70458	0.0171065		6.70125	-0.838555
	7.24325	3.04099		7.24325	3.06658		7.24325	3.08198		7.24325	3.09623			6.70792	0.0156164		6.71125	-0.5017		6.71125	0.0180006		6.70792	-0.838488
	7.25045	3.03846		7.25045	3.06761		7.25045	3.084		7.25045	3.0947			6.71458	0.016205		6.71792	-0.501506		6.71792	0.0196397		6.71458	-0.837833
	7.25765	3.03591		7.25765	3.06847		7.25765	3.08567		7.25765	3.0938			6.72125	0.0160709		6.72458	-0.50085		6.72458	0.0212416		6.72125	-0.836916
	7.26485	3.03365		7.26485	3.06922		7.26485	3.0869		7.26485	3.09348			6.72792	0.0154972		6.73125	-0.499234		6.73125	0.0217706		6.72792	-0.835858
	7.27205	3.03192		7.27205	3.06992		7.27205	3.08755		7.27205	3.09365			6.73458	0.0148192		6.73792	-0.496723		6.73792	0.0211		6.73458	-0.83515
	7.27925	3.03088		7.27925	3.07064		7.27925	3.08752		7.27925	3.09425			6.74125	0.0143945		6.74458	-0.494599		6.74458	0.0198558		6.74125	-0.835061
	7.28645	3.03056		7.28645	3.07147		7.28645	3.08689		7.28645	3.09519			6.74792	0.0142083		6.75125	-0.493765		6.75125	0.0185743		6.74792	-0.835538
	7.29365	3.03086		7.29365	3.0724		7.29365	3.08589		7.29365	3.09635			6.75458	0.0141561		6.75792	-0.493966		6.75792	0.0173971		6.75458	-0.836648
	7.30085	3.03163		7.30085	3.07334		7.30085	3.08483		7.30085	3.09758			6.76125	0.0143796		6.76458	-0.494599		6.76458	0.0162721		6.76125	-0.837907
	7.30805	3.03264		7.30805	3.07407		7.30805	3.08396		7.30805	3.09873			6.76792	0.0145957		6.77125	-0.495724		6.77125	0.0156909		6.76792	-0.838876
	7.31525	3.03366		7.31525	3.07438		7.31525	3.08347		7.31525	3.09958			6.77458	0.0144094		6.77792	-0.497393		6.77792	0.0156462		6.77458	-0.839174
	7.32245	3.03441		7.32245	3.07407		7.32245	3.08346		7.32245	3.09997			6.78125	0.0141114		6.78458	-0.498816		6.78458	0.0157952		6.78125	-0.839375
	7.32965	3.03472		7.32965	3.07308		7.32965	3.08394		7.32965	3.09979			6.78792	0.0136122		6.79125	-0.499398		6.79125	0.0155568		6.78792	-0.839695
	7.33685	3.03457		7.33685	3.07146		7.33685	3.08489		7.33685	3.09907			6.79458	0.0130981		6.79792	-0.499062		6.79792	0.0149012		6.79458	-0.840113
	7.34405	3.03409		7.34405	3.06941		7.34405	3.08614		7.34405	3.09796			6.80125	0.0126138		6.80458	-0.498675		6.80458	0.014022		6.80125	-0.840485
	7.35125	3.03353		7.35125	3.06721		7.35125	3.08747		7.35125	3.09667			6.80792	0.012584		6.81125	-0.498652		6.81125	0.0131056		6.80792	-0.84091
	7.35845	3.03307		7.35845	3.06519		7.35845	3.08862		7.35845	3.09536			6.81458	0.0130162		6.81792	-0.498712		6.81792	0.0125915		6.81458	-0.841409
	7.36565	3.03283		7.36565	3.06371		7.36565	3.0894		7.36565	3.09417			6.82125	0.0136271		6.82458	-0.498578		6.82458	0.0130683		6.82125	-0.841603
	7.37285	3.03289		7.37285	3.06308		7.37285	3.08978		7.37285	3.09322			6.82792	0.0145882		6.83125	-0.498362		6.83125	0.0142381		6.82792	-0.841469
	7.38005	3.03331		7.38005	3.06347		7.38005	3.08985		7.38005	3.09263			6.83458	0.0156835		6.83792	-0.498272		6.83792	0.0150725		6.83458	-0.840992
	7.38725	3.03413		7.38725	3.06489		7.38725	3.0898		7.38725	3.09246			6.84125	0.0165552		6.84458	-0.498332		6.84458	0.0153407		6.84125	-0.840895
	7.39445	3.03527		7.39445	3.06714		7.39445	3.0899		7.39445	3.09264			6.84792	0.0169724		6.85125	-0.497892		6.85125	0.0156313		6.84792	-0.841431
	7.40165	3.03664		7.40165	3.06996		7.40165	3.09038		7.40165	3.09301			6.85458	0.0169054		6.85792	-0.497207		6.85792	0.0163838		6.85458	-0.842609
	7.40885	3.03817		7.40885	3.07305		7.40885	3.09139		7.40885	3.09334			6.86125	0.0165701		6.86458	-0.496708		6.86458	0.0169948		6.86125	-0.844158
	7.41605	3.03984		7.41605	3.07614		7.41605	3.09295		7.41605	3.09349			6.86792	0.0158027		6.87125	-0.496872		6.87125	0.0170767		6.86792	-0.846133
	7.42325	3.04167		7.42325	3.0789		7.42325	3.09488		7.42325	3.09337			6.87458	0.0147074		6.87792	-0.497624		6.87792	0.0170395		6.87458	-0.848256
	7.43045	3.04363		7.43045	3.08103		7.43045	3.09693		7.43045	3.09302			6.88125	0.0135154		6.88458	-0.49828		6.88458	0.0171736		6.88125	-0.849724
	7.43765	3.04559		7.43765	3.08229		7.43765	3.09877		7.43765	3.09247			6.88792	0.0127777		6.89125	-0.498988		6.89125	0.017412		6.88792	-0.850089
	7.44485	3.04741		7.44485	3.08258		7.44485	3.10014		7.44485	3.09173			6.89458	0.0126734		6.89792	-0.499599		6.89792	0.0174418		6.89458	-0.849724
	7.45205	3.0489		7.45205	3.08201		7.45205	3.10087		7.45205	3.09082			6.90125	0.0127405		6.90458	-0.500225		6.90458	0.0171214		6.90125	-0.849098
	7.45925	3.04989		7.45925	3.08076		7.45925	3.10087		7.45925	3.0898			6.90792	0.012666		6.91125	-0.500478		6.91125	0.016652		6.90792	-0.848204
	7.46645	3.05012		7.46645	3.07903		7.46645	3.10022		7.46645	3.08886			6.91458	0.0124648		6.91792	-0.500232		6.91792	0.0162497		6.91458	-0.847332
	7.47365	3.0494		7.47365	3.07707		7.47365	3.09914		7.47365	3.08824			6.92125	0.012733		6.92458	-0.499718		6.92458	0.0162348		6.92125	-0.846922
	7.48085	3.04772		7.48085	3.07511		7.48085	3.09796		7.48085	3.08815			6.92792	0.0130609		6.93125	-0.49945		6.93125	0.0162348		6.92792	-0.847086
	7.48805	3.04527		7.48805	3.07333		7.48805	3.09695		7.48805	3.08865			6.93458	0.0129938		6.93792	-0.499614		6.93792	0.0156313		6.93458	-0.847533
	7.49525	3.04235		7.49525	3.07178		7.49525	3.09631		7.49525	3.0897			6.94125	0.0125393		6.94458	-0.500239		6.94458	0.0144318		6.94125	-0.848241
	7.50245	3.03923		7.50245	3.07037		7.50245	3.09608		7.50245	3.09122			6.94792	0.0125095		6.95125	-0.50129		6.95125	0.0135675		6.94792	-0.84912
	7.50965	3.03615		7.50965	3.06889		7.50965	3.09618		7.50965	3.09314			6.95458	0.0131354		6.95792	-0.502564		6.95792	0.0134632		6.95458	-0.849694
	7.51685	3.03335		7.51685	3.06721		7.51685	3.09637		7.51685	3.09527			6.96125	0.013873		6.96458	-0.503711		6.96458	0.013791		6.96125	-0.849634
	7.52405	3.03108		7.52405	3.06523		7.52405	3.09636		7.52405	3.09731			6.96792	0.0139326		6.97125	-0.504203		6.97125	0.0141934		6.96792	-0.849195
	7.53125	3.02955		7.53125	3.06302		7.53125	3.09595		7.53125	3.09891			6.97458	0.0135824		6.97792	-0.504062		6.97792	0.0146851		6.97458	-0.84886
	7.53845	3.02883		7.53845	3.0606		7.53845	3.09507		7.53845	3.09979			6.98125	0.0134259		6.98458	-0.503525		6.98458	0.015147		6.98125	-0.848725
	7.54565	3.02889		7.54565	3.0581		7.54565	3.09374		7.54565	3.09988			6.98792	0.0137016		6.99125	-0.50284		6.99125	0.0150353		6.98792	-0.848599
	7.55285	3.02969		7.55285	3.05567		7.55285	3.09206		7.55285	3.09924			6.99458	0.0140294		6.99792	-0.502408		6.99792	0.0146106		6.99458	-0.848562
	7.56005	3.03128		7.56005	3.05355		7.56005	3.09016		7.56005	3.09802			7.00125	0.0139996		7.00458	-0.502437		7.00458	0.01432		7.00125	-0.848994
	7.56725	3.03378		7.56725	3.05194		7.56725	3.08825		7.56725	3.09643			7.00792	0.0140443		7.01125	-0.502981		7.01125	0.0142306		7.00792	-0.84994
	7.57445	3.0372		7.57445	3.05089		7.57445	3.08653		7.57445	3.0948			7.01458	0.0142381		7.01792	-0.503965		7.01792	0.014171		7.01458	-0.851192
	7.58165	3.04133		7.58165	3.05023		7.58165	3.08512		7.58165	3.09348			7.02125	0.0146106		7.02458	-0.50471		7.02458	0.0142083		7.02125	-0.852622
	7.58885	3.04583		7.58885	3.04973		7.58885	3.08402		7.58885	3.09271			7.02792	0.0146031		7.03125	-0.505082		7.03125	0.0144318		7.02792	-0.854053
	7.59605	3.05023		7.59605	3.04925		7.59605	3.08312		7.59605	3.09257			7.03458	0.0143498		7.03792	-0.504792		7.03792	0.0142306		7.03458	-0.854984
	7.60325	3.05407		7.60325	3.04875		7.60325	3.08237		7.60325	3.09294			7.04125	0.0142828		7.04458	-0.504307		7.04458	0.0135824		7.04125	-0.854954
	7.61045	3.05693		7.61045	3.04825		7.61045	3.08185		7.61045	3.09369			7.04792	0.014469		7.05125	-0.503734		7.05125	0.0129491		7.04792	-0.854567
	7.61765	3.05849		7.61765	3.04763		7.61765	3.0817		7.61765	3.09467			7.05458	0.0147969		7.05792	-0.502974		7.05792	0.0127628		7.05458	-0.854075
	7.62485	3.05852		7.62485	3.04683		7.62485	3.08203		7.62485	3.09565			7.06125	0.0147521		7.06458	-0.502475		7.06458	0.0129193		7.06125	-0.853397
	7.63205	3.05701		7.63205	3.04589		7.63205	3.08293		7.63205	3.0964			7.06792	0.014402		7.07125	-0.502348		7.07125	0.0134557		7.06792	-0.852935
	7.63925	3.05422		7.63925	3.04502		7.63925	3.08443		7.63925	3.09674			7.07458	0.0139922		7.07792	-0.50272		7.07792	0.0146925		7.07458	-0.8533
	7.64645	3.0506		7.64645	3.04452		7.64645	3.08651		7.64645	3.09674			7.08125	0.0138581		7.08458	-0.502929		7.08458	0.0158995		7.08125	-0.854388
	7.65365	3.04666		7.65365	3.04461		7.65365	3.08902		7.65365	3.09668			7.08792	0.0141338		7.09125	-0.503026		7.09125	0.0166222		7.08792	-0.8552
	7.66085	3.04289		7.66085	3.04545		7.66085	3.09166		7.66085	3.09693			7.09458	0.0144765		7.09792	-0.503309		7.09792	0.0169426		7.09458	-0.855558
	7.66805	3.03967		7.66805	3.0472		7.66805	3.09407		7.66805	3.09765			7.10125	0.0147521		7.10458	-0.503965		7.10458	0.0172406		7.10125	-0.856012
	7.67525	3.0373		7.67525	3.04999		7.67525	3.09597		7.67525	3.09888			7.10792	0.0151023		7.11125	-0.504352		7.11125	0.0172779		7.10792	-0.856407
	7.68245	3.03595		7.68245	3.05385		7.68245	3.09714		7.68245	3.10048			7.11458	0.0158101		7.11792	-0.504456		7.11792	0.0170097		7.11458	-0.856504
	7.68965	3.03566		7.68965	3.05857		7.68965	3.09747		7.68965	3.1023			7.12125	0.0162348		7.12458	-0.504829		7.12458	0.0170022		7.12125	-0.856496
	7.69685	3.0363		7.69685	3.06371		7.69685	3.09698		7.69685	3.10407			7.12792	0.0157356		7.13125	-0.505812		7.13125	0.0170618		7.12792	-0.856914
	7.70405	3.03767		7.70405	3.06867		7.70405	3.0958		7.70405	3.10542			7.13458	0.0146702		7.13792	-0.506677		7.13792	0.0164956		7.13458	-0.857763
	7.71125	3.03952		7.71125	3.0728		7.71125	3.09418		7.71125	3.10599			7.14125	0.0140294		7.14458	-0.506684		7.14458	0.0152737		7.14125	-0.858299
	7.71845	3.04166		7.71845	3.07557		7.71845	3.09234		7.71845	3.10556			7.14792	0.0141934		7.15125	-0.506379		7.15125	0.0146925		7.14792	-0.858374
	7.72565	3.0439		7.72565	3.0766		7.72565	3.09043		7.72565	3.10422			7.15458	0.0141114		7.15792	-0.506207		7.15792	0.0146925		7.15458	-0.858396
	7.73285	3.04599		7.73285	3.07575		7.73285	3.08852		7.73285	3.10229			7.16125	0.0139251		7.16458	-0.505991		7.16458	0.0148565		7.16125	-0.858657
	7.74005	3.0477		7.74005	3.07317		7.74005	3.08673		7.74005	3.10023			7.16792	0.0143275		7.17125	-0.505626		7.17125	0.014931		7.16792	-0.858918
	7.74725	3.04893		7.74725	3.06922		7.74725	3.08516		7.74725	3.09849			7.17458	0.0157207		7.17792	-0.505581		7.17792	0.0154972		7.17458	-0.858873
	7.75445	3.04966		7.75445	3.06445		7.75445	3.08385		7.75445	3.09736			7.18125	0.0172257		7.18458	-0.505805		7.18458	0.016734		7.18125	-0.858739
	7.76165	3.05004		7.76165	3.05951		7.76165	3.08278		7.76165	3.097			7.18792	0.0177845		7.19125	-0.505671		7.19125	0.017643		7.18792	-0.858895
	7.76885	3.05024		7.76885	3.05497		7.76885	3.0818		7.76885	3.09739			7.19458	0.0181049		7.19792	-0.504836		7.19792	0.0181198		7.19458	-0.859387
	7.77605	3.05036		7.77605	3.05131		7.77605	3.08083		7.77605	3.09835			7.20125	0.0185221		7.20458	-0.503831		7.20458	0.0178665		7.20125	-0.859909
	7.78325	3.05048		7.78325	3.04874		7.78325	3.0799		7.78325	3.09964			7.20792	0.0189319		7.21125	-0.502735		7.21125	0.0174791		7.20792	-0.860251
	7.79045	3.05061		7.79045	3.04723		7.79045	3.07905		7.79045	3.10089			7.21458	0.0184998		7.21792	-0.501581		7.21792	0.0173375		7.21458	-0.860386
	7.79765	3.05079		7.79765	3.0466		7.79765	3.07832		7.79765	3.10171			7.22125	0.0174195		7.22458	-0.500791		7.22458	0.0174418		7.22125	-0.860795
	7.80485	3.05094		7.80485	3.04656		7.80485	3.07782		7.80485	3.1018			7.22792	0.0164807		7.23125	-0.500686		7.23125	0.017263		7.22792	-0.861593
	7.81205	3.05094		7.81205	3.04686		7.81205	3.07776		7.81205	3.101			7.23458	0.0155643		7.23792	-0.501528		7.23792	0.0164509		7.23458	-0.86239
	7.81925	3.05053		7.81925	3.04733		7.81925	3.07834		7.81925	3.09937			7.24125	0.0144392		7.24458	-0.502631		7.24458	0.0158548		7.24125	-0.862963
	7.82645	3.0495		7.82645	3.04785		7.82645	3.07965		7.82645	3.0971			7.24792	0.0130683		7.25125	-0.503607		7.25125	0.016287		7.24792	-0.863582
	7.83365	3.04772		7.83365	3.04843		7.83365	3.08155		7.83365	3.09443			7.25458	0.0122413		7.25792	-0.504009		7.25792	0.0171736		7.25458	-0.864431
	7.84085	3.04517		7.84085	3.04915		7.84085	3.08363		7.84085	3.09162			7.26125	0.0123009		7.26458	-0.503644		7.26458	0.0176877		7.26125	-0.864916
	7.84805	3.04188		7.84805	3.0502		7.84805	3.08548		7.84805	3.08896			7.26792	0.0127181		7.27125	-0.503227		7.27125	0.017859		7.26792	-0.864588
	7.85525	3.03796		7.85525	3.05173		7.85525	3.08658		7.85525	3.08679			7.27458	0.013046		7.27792	-0.502817		7.27792	0.0181496		7.27458	-0.863723
	7.86245	3.03356		7.86245	3.05384		7.86245	3.08652		7.86245	3.08543			7.28125	0.0133291		7.28458	-0.502847		7.28458	0.0184998		7.28125	-0.863105
	7.86965	3.02897		7.86965	3.05648		7.86965	3.08494		7.86965	3.085			7.28792	0.0137612		7.29125	-0.503235		7.29125	0.0182763		7.28792	-0.862859
	7.87685	3.02458		7.87685	3.05949		7.87685	3.08173		7.87685	3.08539			7.29458	0.0142008		7.29792	-0.504114		7.29792	0.0176579		7.29458	-0.862941
	7.88405	3.02076		7.88405	3.06258		7.88405	3.07716		7.88405	3.08637			7.30125	0.0143722		7.30458	-0.505373		7.30458	0.0171885		7.30125	-0.863299
	7.89125	3.01784		7.89125	3.06541		7.89125	3.07182		7.89125	3.08763			7.30792	0.0146553		7.31125	-0.506483		7.31125	0.017181		7.30792	-0.863783
	7.89845	3.01604		7.89845	3.06764		7.89845	3.06643		7.89845	3.08897			7.31458	0.0152141		7.31792	-0.506893		7.31792	0.0173375		7.31458	-0.864401
	7.90565	3.01543		7.90565	3.06906		7.90565	3.0616		7.90565	3.09017			7.32125	0.0155941		7.32458	-0.506543		7.32458	0.0172332		7.32125	-0.864856
	7.91285	3.01595		7.91285	3.06963		7.91285	3.05778		7.91285	3.09109			7.32792	0.0155568		7.33125	-0.50547		7.33125	0.0168681		7.32792	-0.865437
	7.92005	3.01735		7.92005	3.06942		7.92005	3.05529		7.92005	3.09165			7.33458	0.0151768		7.33792	-0.504248		7.33792	0.0167489		7.33458	-0.866123
	7.92725	3.01926		7.92725	3.06858		7.92725	3.05435		7.92725	3.09188			7.34125	0.0147969		7.34458	-0.503451		7.34458	0.0169873		7.34125	-0.866808
	7.93445	3.02128		7.93445	3.06731		7.93445	3.05496		7.93445	3.09193			7.34792	0.0143722		7.35125	-0.5031		7.35125	0.0174865		7.34792	-0.867747
	7.94165	3.0231		7.94165	3.06582		7.94165	3.05688		7.94165	3.092			7.35458	0.0139251		7.35792	-0.503324		7.35792	0.0180528		7.35458	-0.868909
	7.94885	3.02455		7.94885	3.06435		7.94885	3.0597		7.94885	3.09231			7.36125	0.0138134		7.36458	-0.503868		7.36458	0.0186786		7.36125	-0.870124
	7.95605	3.02563		7.95605	3.06305		7.95605	3.06297		7.95605	3.09291			7.36792	0.0142083		7.37125	-0.504971		7.37125	0.0194684		7.36792	-0.870824
	7.96325	3.02642		7.96325	3.06194		7.96325	3.06645		7.96325	3.0938			7.37458	0.0151917		7.37792	-0.506207		7.37792	0.0197217		7.37458	-0.871144
	7.97045	3.02715		7.97045	3.06091		7.97045	3.06998		7.97045	3.09483			7.38125	0.016503		7.38458	-0.507079		7.38458	0.0192076		7.38125	-0.871353
	7.97765	3.02813		7.97765	3.05983		7.97765	3.07342		7.97765	3.09588			7.38792	0.0174493		7.39125	-0.507571		7.39125	0.0181571		7.38792	-0.871442
	7.98485	3.02963		7.98485	3.05873		7.98485	3.07657		7.98485	3.09682			7.39458	0.0180155		7.39792	-0.507906		7.39792	0.0170395		7.39458	-0.871301
	7.99205	3.0318		7.99205	3.05771		7.99205	3.07915		7.99205	3.09761			7.40125	0.0183061		7.40458	-0.507973		7.40458	0.0162497		7.40125	-0.87101
	7.99925	3.0346		7.99925	3.05694		7.99925	3.08091		7.99925	3.09824			7.40792	0.0183433		7.41125	-0.507452		7.41125	0.0156537		7.40792	-0.870764
	8.00645	3.03778		8.00645	3.05656		8.00645	3.0817		8.00645	3.09877			7.41458	0.0175908		7.41792	-0.506625		7.41792	0.0154376		7.41458	-0.870332
	8.01365	3.04098		8.01365	3.05668		8.01365	3.08157		8.01365	3.09929			7.42125	0.0158399		7.42458	-0.506051		7.42458	0.0156984		7.42125	-0.869744
	8.02085	3.04381		8.02085	3.05733		8.02085	3.08065		8.02085	3.09989			7.42792	0.0140443		7.43125	-0.505641		7.43125	0.0160784		7.42792	-0.869431
	8.02805	3.0459		8.02805	3.05851		8.02805	3.0793		8.02805	3.10072			7.43458	0.0126064		7.43792	-0.505142		7.43792	0.0163615		7.43458	-0.869706
	8.03525	3.04699		8.03525	3.0601		8.03525	3.07783		8.03525	3.10186			7.44125	0.0115409		7.44458	-0.504851		7.44458	0.0162795		7.44125	-0.870377
	8.04245	3.04695		8.04245	3.0619		8.04245	3.07662		8.04245	3.10329			7.44792	0.0106618		7.45125	-0.505537		7.45125	0.0160411		7.44792	-0.871085
	8.04965	3.04582		8.04965	3.06365		8.04965	3.07603		8.04965	3.10478			7.45458	0.0102669		7.45792	-0.506572		7.45792	0.015676		7.45458	-0.871822
	8.05685	3.04379		8.05685	3.06509		8.05685	3.07633		8.05685	3.10598			7.46125	0.0103563		7.46458	-0.507683		7.46458	0.0152588		7.46125	-0.873037
	8.06405	3.0412		8.06405	3.06599		8.06405	3.07767		8.06405	3.10659			7.46792	0.0106543		7.47125	-0.508569		7.47125	0.0149757		7.46792	-0.874259
	8.07125	3.03837		8.07125	3.06626		8.07125	3.07994		8.07125	3.10645			7.47458	0.0109896		7.47792	-0.509515		7.47792	0.014931		7.47458	-0.875197
	8.07845	3.03559		8.07845	3.06595		8.07845	3.08288		8.07845	3.10555			7.48125	0.0114888		7.48458	-0.510126		7.48458	0.0153854		7.48125	-0.875913
	8.08565	3.03313		8.08565	3.06523		8.08565	3.08611		8.08565	3.10392			7.48792	0.0119358		7.49125	-0.509955		7.49125	0.0160709		7.48792	-0.87674
	8.09285	3.03114		8.09285	3.06431		8.09285	3.08934		8.09285	3.10168			7.49458	0.0119284		7.49792	-0.509515		7.49792	0.0167415		7.49458	-0.877634
	8.10005	3.02972		8.10005	3.06343		8.10005	3.09238		8.10005	3.09907			7.50125	0.0116602		7.50458	-0.508592		7.50458	0.0170544		7.50125	-0.87782
	8.10725	3.02884		8.10725	3.0628		8.10725	3.09513		8.10725	3.0965			7.50792	0.0113174		7.51125	-0.50763		7.51125	0.016883		7.50792	-0.877634
	8.11445	3.02843		8.11445	3.06263		8.11445	3.09747		8.11445	3.09445			7.51458	0.0114143		7.51792	-0.506721		7.51792	0.0165328		7.51458	-0.877276
	8.12165	3.02842		8.12165	3.06305		8.12165	3.0993		8.12165	3.09325			7.52125	0.0118166		7.52458	-0.506312		7.52458	0.0159219		7.52125	-0.876993
	8.12885	3.02881		8.12885	3.06408		8.12885	3.10054		8.12885	3.09304			7.52792	0.0127032		7.53125	-0.506282		7.53125	0.0154153		7.52792	-0.876494
	8.13605	3.02957		8.13605	3.06555		8.13605	3.10123		8.13605	3.09378			7.53458	0.0140071		7.53792	-0.506327		7.53792	0.0154749		7.53458	-0.876263
	8.14325	3.03065		8.14325	3.06717		8.14325	3.10145		8.14325	3.09547			7.54125	0.0154674		7.54458	-0.506692		7.54458	0.0161827		7.54125	-0.876673
	8.15045	3.03195		8.15045	3.0686		8.15045	3.10128		8.15045	3.09803			7.54792	0.0168532		7.55125	-0.507198		7.55125	0.0173002		7.54792	-0.877485
	8.15765	3.03342		8.15765	3.06954		8.15765	3.10077		8.15765	3.1013			7.55458	0.0176653		7.55792	-0.507601		7.55792	0.0180528		7.55458	-0.878476
	8.16485	3.03504		8.16485	3.0697		8.16485	3.10001		8.16485	3.10492			7.56125	0.0180751		7.56458	-0.507735		7.56458	0.0183508		7.56125	-0.879459
	8.17205	3.03683		8.17205	3.06886		8.17205	3.09917		8.17205	3.10853			7.56792	0.0182316		7.57125	-0.507697		7.57125	0.0182465		7.56792	-0.880316
	8.17925	3.03874		8.17925	3.06698		8.17925	3.09842		8.17925	3.11179			7.57458	0.0182837		7.57792	-0.507653		7.57792	0.0177845		7.57458	-0.880301
	8.18645	3.04066		8.18645	3.06425		8.18645	3.09796		8.18645	3.11444			7.58125	0.0183061		7.58458	-0.507385		7.58458	0.0174567		7.58125	-0.879571
	8.19365	3.04249		8.19365	3.06103		8.19365	3.09793		8.19365	3.11624			7.58792	0.0180826		7.59125	-0.507124		7.59125	0.0172779		7.58792	-0.878662
	8.20085	3.0442		8.20085	3.05773		8.20085	3.09839		8.20085	3.117			7.59458	0.0177771		7.59792	-0.507094		7.59792	0.017494		7.59458	-0.877984
	8.20805	3.04577		8.20805	3.05471		8.20805	3.09939		8.20805	3.11668			7.60125	0.0174716		7.60458	-0.507288		7.60458	0.0177994		7.60125	-0.877306
	8.21525	3.04719		8.21525	3.05224		8.21525	3.10094		8.21525	3.11542			7.60792	0.0172108		7.61125	-0.50763		7.61125	0.0181571		7.60792	-0.876568
	8.22245	3.04838		8.22245	3.05052		8.22245	3.10302		8.22245	3.11351			7.61458	0.0168234		7.61792	-0.508241		7.61792	0.0182465		7.61458	-0.876397
	8.22965	3.04933		8.22965	3.04968		8.22965	3.10546		8.22965	3.11137			7.62125	0.0160187		7.62458	-0.508972		7.62458	0.0179261		7.62125	-0.876904
	8.23685	3.04999		8.23685	3.04971		8.23685	3.10801		8.23685	3.10935			7.62792	0.0152662		7.63125	-0.509441		7.63125	0.0178963		7.62792	-0.877738
	8.24405	3.05039		8.24405	3.05048		8.24405	3.11046		8.24405	3.10773			7.63458	0.0146553		7.63792	-0.509292		7.63792	0.0185892		7.63458	-0.878707
	8.25125	3.05052		8.25125	3.05175		8.25125	3.11258		8.25125	3.10665			7.64125	0.0140369		7.64458	-0.509009		7.64458	0.0200123		7.64125	-0.879683
	8.25845	3.05032		8.25845	3.05333		8.25845	3.11428		8.25845	3.10613			7.64792	0.013411		7.65125	-0.50889		7.65125	0.0212491		7.64792	-0.88083
	8.26565	3.04972		8.26565	3.05508		8.26565	3.11543		8.26565	3.10609			7.65458	0.0132248		7.65792	-0.508763		7.65792	0.0220686		7.65458	-0.88203
	8.27285	3.04862		8.27285	3.0569		8.27285	3.11599		8.27285	3.10639			7.66125	0.0135973		7.66458	-0.508875		7.66458	0.0224411		7.66125	-0.882894
	8.28005	3.04697		8.28005	3.05867		8.28005	3.11606		8.28005	3.10682			7.66792	0.0139624		7.67125	-0.50953		7.67125	0.0222996		7.66792	-0.88349
	8.28725	3.04489		8.28725	3.06028		8.28725	3.11585		8.28725	3.10717			7.67458	0.0142083		7.67792	-0.510707		7.67792	0.0216961		7.67458	-0.883408
	8.29445	3.0426		8.29445	3.06165		8.29445	3.11569		8.29445	3.10724			7.68125	0.0148043		7.68458	-0.511818		7.68458	0.0210479		7.68125	-0.883169
	8.30165	3.04047		8.30165	3.06277		8.30165	3.11593		8.30165	3.1069			7.68792	0.0156537		7.69125	-0.512391		7.69125	0.0204965		7.68792	-0.882968
	8.30885	3.03885		8.30885	3.06362		8.30885	3.11688		8.30885	3.10612			7.69458	0.0160262		7.69792	-0.512592		7.69792	0.0197515		7.69458	-0.882626
	8.31605	3.03803		8.31605	3.06416		8.31605	3.11865		8.31605	3.10497			7.70125	0.0157133		7.70458	-0.512682		7.70458	0.0188202		7.70125	-0.882283
	8.32325	3.03826		8.32325	3.06434		8.32325	3.12119		8.32325	3.10361			7.70792	0.0152513		7.71125	-0.512399		7.71125	0.0179037		7.70792	-0.881851
	8.33045	3.03965		8.33045	3.06424		8.33045	3.12425		8.33045	3.1022			7.71458	0.0151992		7.71792	-0.512168		7.71792	0.0172034		7.71458	-0.881709
	8.33765	3.04216		8.33765	3.06397		8.33765	3.12756		8.33765	3.10093			7.72125	0.014782		7.72458	-0.511758		7.72458	0.0162423		7.72125	-0.88159
	8.34485	3.04554		8.34485	3.06367		8.34485	3.13084		8.34485	3.10007			7.72792	0.0138655		7.73125	-0.51146		7.73125	0.01546		7.72792	-0.88159
	8.35205	3.04937		8.35205	3.06343		8.35205	3.13389		8.35205	3.09986			7.73458	0.0128075		7.73792	-0.511162		7.73792	0.0153109		7.73458	-0.882044
	8.35925	3.05318		8.35925	3.06336		8.35925	3.13663		8.35925	3.10053			7.74125	0.012517		7.74458	-0.510737		7.74458	0.0155047		7.74125	-0.882842
	8.36645	3.05657		8.36645	3.06366		8.36645	3.13901		8.36645	3.10217			7.74792	0.012584		7.75125	-0.510447		7.75125	0.0155643		7.74792	-0.88349
	8.37365	3.05927		8.37365	3.06454		8.37365	3.1411		8.37365	3.10466			7.75458	0.0125766		7.75792	-0.510238		7.75792	0.0152364		7.75458	-0.883602
	8.38085	3.06113		8.38085	3.06611		8.38085	3.14312		8.38085	3.10774			7.76125	0.0129417		7.76458	-0.510395		7.76458	0.01546		7.76125	-0.883453
	8.38805	3.06211		8.38805	3.06828		8.38805	3.14543		8.38805	3.11103			7.76792	0.0138953		7.77125	-0.510961		7.77125	0.0160113		7.76792	-0.883378
	8.39525	3.06221		8.39525	3.07082		8.39525	3.1484		8.39525	3.11412			7.77458	0.0149533		7.77792	-0.511885		7.77792	0.0167415		7.77458	-0.883564
	8.40245	3.06153		8.40245	3.07342		8.40245	3.15226		8.40245	3.1166			7.78125	0.0153333		7.78458	-0.512928		7.78458	0.0176877		7.78125	-0.883862
	8.40965	3.06019		8.40965	3.07586		8.40965	3.15707		8.40965	3.11815			7.78792	0.0153705		7.79125	-0.513516		7.79125	0.0188574		7.78792	-0.884369
	8.41685	3.05834		8.41685	3.07791		8.41685	3.16268		8.41685	3.11856			7.79458	0.0152886		7.79792	-0.513554		7.79792	0.0201315		7.79458	-0.885315
	8.42405	3.0562		8.42405	3.07943		8.42405	3.1689		8.42405	3.11779			7.80125	0.0149757		7.80458	-0.513516		7.80458	0.0206381		7.80125	-0.886746
	8.43125	3.05399		8.43125	3.08026		8.43125	3.17551		8.43125	3.11598			7.80792	0.0139996		7.81125	-0.513539		7.81125	0.0203475		7.80792	-0.888333
	8.43845	3.05195		8.43845	3.08039		8.43845	3.18232		8.43845	3.11346			7.81458	0.0130013		7.81792	-0.513285		7.81792	0.0195429		7.81458	-0.889599
	8.44565	3.05038		8.44565	3.07993		8.44565	3.18906		8.44565	3.11066			7.82125	0.0127405		7.82458	-0.512771		7.82458	0.0186786		7.82125	-0.890575
	8.45285	3.0495		8.45285	3.07918		8.45285	3.19546		8.45285	3.10807			7.82792	0.0132471		7.83125	-0.512555		7.83125	0.0180751		7.82792	-0.891179
	8.46005	3.04953		8.46005	3.07843		8.46005	3.2013		8.46005	3.1061			7.83458	0.01394		7.83792	-0.512853		7.83792	0.0178069		7.83458	-0.891075
	8.46725	3.05051		8.46725	3.07792		8.46725	3.20641		8.46725	3.10498			7.84125	0.0142977		7.84458	-0.513032		7.84458	0.0179186		7.84125	-0.89027
	8.47445	3.05241		8.47445	3.07775		8.47445	3.21078		8.47445	3.10481			7.84792	0.0145957		7.85125	-0.512809		7.85125	0.0184849		7.84792	-0.889249
	8.48165	3.05505		8.48165	3.07789		8.48165	3.21445		8.48165	3.10552			7.85458	0.0150502		7.85792	-0.512779		7.85792	0.0193119		7.85458	-0.888363
	8.48885	3.05817		8.48885	3.07837		8.48885	3.21749		8.48885	3.10699			7.86125	0.0154078		7.86458	-0.512868		7.86458	0.0199452		7.86125	-0.887357
	8.49605	3.06141		8.49605	3.07915		8.49605	3.21998		8.49605	3.10903			7.86792	0.0154972		7.87125	-0.512905		7.87125	0.0204295		7.86792	-0.886343
	8.50325	3.06444		8.50325	3.08017		8.50325	3.22201		8.50325	3.11134			7.87458	0.0152215		7.87792	-0.512607		7.87792	0.0206009		7.87458	-0.885926
	8.51045	3.06699		8.51045	3.08132		8.51045	3.22372		8.51045	3.11358			7.88125	0.0151098		7.88458	-0.512451		7.88458	0.0206456		7.88125	-0.886425
	8.51765	3.06893		8.51765	3.08243		8.51765	3.22531		8.51765	3.11537			7.88792	0.0152141		7.89125	-0.512481		7.89125	0.0200346		7.88792	-0.887275
	8.52485	3.07021		8.52485	3.08341		8.52485	3.22701		8.52485	3.11652			7.89458	0.0152886		7.89792	-0.512458		7.89792	0.0191256		7.89458	-0.88796
	8.53205	3.07089		8.53205	3.08424		8.53205	3.22906		8.53205	3.11695			7.90125	0.0151321		7.90458	-0.512376		7.90458	0.0184029		7.90125	-0.888541
	8.53925	3.07112		8.53925	3.08496		8.53925	3.2316		8.53925	3.11667			7.90792	0.0146404		7.91125	-0.512443		7.91125	0.0179037		7.90792	-0.889406
	8.54645	3.07106		8.54645	3.08563		8.54645	3.2346		8.54645	3.11573			7.91458	0.0142455		7.91792	-0.512697		7.91792	0.0172704		7.91458	-0.890456
	8.55365	3.07084		8.55365	3.08626		8.55365	3.23787		8.55365	3.11424			7.92125	0.0137389		7.92458	-0.512905		7.92458	0.0166297		7.92125	-0.891455
	8.56085	3.07055		8.56085	3.08694		8.56085	3.24121		8.56085	3.11242			7.92792	0.0132546		7.93125	-0.512838		7.93125	0.0166222		7.92792	-0.892334
	8.56805	3.07023		8.56805	3.08775		8.56805	3.2445		8.56805	3.11061			7.93458	0.0128895		7.93792	-0.512794		7.93792	0.0170171		7.93458	-0.893131
	8.57525	3.06984		8.57525	3.0888		8.57525	3.24772		8.57525	3.10925			7.94125	0.0126064		7.94458	-0.513002		7.94458	0.0173151		7.94125	-0.893764
	8.58245	3.06938		8.58245	3.09013		8.58245	3.25083		8.58245	3.10871			7.94792	0.0125393		7.95125	-0.513062		7.95125	0.0170767		7.94792	-0.893861
	8.58965	3.06888		8.58965	3.09167		8.58965	3.25372		8.58965	3.10928			7.95458	0.0125319		7.95792	-0.512905		7.95792	0.0166595		7.95458	-0.893645
	8.59686	3.06843		8.59686	3.09322		8.59686	3.25624		8.59686	3.11108			7.96125	0.0127628		7.96458	-0.5126		7.96458	0.0160486		7.96125	-0.893064
	8.60406	3.06816		8.60406	3.09459		8.60406	3.25826		8.60406	3.11408			7.96792	0.0128597		7.97125	-0.512302		7.97125	0.0157133		7.96792	-0.892326
	8.61126	3.06819		8.61126	3.09559		8.61126	3.25968		8.61126	3.11798			7.97458	0.012897		7.97792	-0.511713		7.97792	0.0155792		7.97458	-0.891648
	8.61846	3.06861		8.61846	3.09607		8.61846	3.26042		8.61846	3.12232			7.98125	0.0131577		7.98458	-0.511564		7.98458	0.0154004		7.98125	-0.891469
	8.62566	3.06942		8.62566	3.09602		8.62566	3.26034		8.62566	3.12646			7.98792	0.0137165		7.99125	-0.512429		7.99125	0.0150427		7.98792	-0.891991
	8.63286	3.07057		8.63286	3.09544		8.63286	3.2593		8.63286	3.12979			7.99458	0.0143498		7.99792	-0.513799		7.99792	0.0147447		7.99458	-0.892967
	8.64006	3.07187		8.64006	3.0944		8.64006	3.25726		8.64006	3.13184			8.00125	0.0147372		8.00458	-0.514984		8.00458	0.0149235		8.00125	-0.894211
	8.64726	3.07311		8.64726	3.09309		8.64726	3.25447		8.64726	3.13231			8.00792	0.0152513		8.01125	-0.51637		8.01125	0.0151768		8.00792	-0.895321
	8.65446	3.07413		8.65446	3.09169		8.65446	3.25137		8.65446	3.13121			8.01458	0.0157952		8.01792	-0.518292		8.01792	0.015676		8.01458	-0.896044
	8.66166	3.07481		8.66166	3.09047		8.66166	3.24849		8.66166	3.12874			8.02125	0.0164211		8.02458	-0.519395		8.02458	0.0161752		8.02125	-0.896238
	8.66886	3.07511		8.66886	3.08961		8.66886	3.24635		8.66886	3.12535			8.02792	0.016816		8.03125	-0.519156		8.03125	0.0166893		8.02792	-0.896238
	8.67606	3.07503		8.67606	3.08921		8.67606	3.24526		8.67606	3.12158			8.03458	0.0170991		8.03792	-0.518642		8.03792	0.0170618		8.03458	-0.896186
	8.68326	3.07461		8.68326	3.08928		8.68326	3.24536		8.68326	3.118			8.04125	0.0173599		8.04458	-0.518821		8.04458	0.0172555		8.04125	-0.896059
	8.69046	3.07385		8.69046	3.0898		8.69046	3.24651		8.69046	3.11502			8.04792	0.017494		8.05125	-0.518925		8.05125	0.0175834		8.04792	-0.895962
	8.69766	3.07272		8.69766	3.0907		8.69766	3.24845		8.69766	3.11289			8.05458	0.0175834		8.05792	-0.518106		8.05792	0.0175759		8.05458	-0.896104
	8.70486	3.07113		8.70486	3.09185		8.70486	3.25081		8.70486	3.11171			8.06125	0.0171512		8.06458	-0.5171		8.06458	0.0176504		8.06125	-0.896402
	8.71206	3.06894		8.71206	3.09303		8.71206	3.25316		8.71206	3.11152			8.06792	0.0161752		8.07125	-0.516869		8.07125	0.0176951		8.06792	-0.896469
	8.71926	3.06608		8.71926	3.09395		8.71926	3.25516		8.71926	3.11223			8.07458	0.0151694		8.07792	-0.516959		8.07792	0.0178963		8.07458	-0.896044
	8.72646	3.06265		8.72646	3.09432		8.72646	3.25664		8.72646	3.11374			8.08125	0.0145137		8.08458	-0.516377		8.08458	0.0182316		8.08125	-0.895485
	8.73366	3.05892		8.73366	3.094		8.73366	3.25759		8.73366	3.11593			8.08792	0.0144914		8.09125	-0.515394		8.09125	0.0179932		8.08792	-0.89515
	8.74086	3.05531		8.74086	3.09308		8.74086	3.25826		8.74086	3.11863			8.09458	0.0145286		8.09792	-0.515051		8.09792	0.0173897		8.09458	-0.894867
	8.74806	3.05225		8.74806	3.09181		8.74806	3.25896		8.74806	3.12164			8.10125	0.0145957		8.10458	-0.515454		8.10458	0.0165775		8.10125	-0.894576
	8.75526	3.05014		8.75526	3.09052		8.75526	3.26004		8.75526	3.12475			8.10792	0.0146255		8.11125	-0.515565		8.11125	0.0161231		8.10792	-0.89433
	8.76246	3.04931		8.76246	3.08954		8.76246	3.26179		8.76246	3.12776			8.11458	0.0143945		8.11792	-0.514843		8.11792	0.0159889		8.11458	-0.894405
	8.76966	3.04993		8.76966	3.08922		8.76966	3.26437		8.76966	3.13053			8.12125	0.0139177		8.12458	-0.514179		8.12458	0.0158623		8.12125	-0.894643
	8.77686	3.05194		8.77686	3.08983		8.77686	3.26782		8.77686	3.13295			8.12792	0.0133216		8.13125	-0.514045		8.13125	0.0162125		8.12792	-0.895165
	8.78406	3.05503		8.78406	3.09154		8.78406	3.27201		8.78406	3.13491			8.13458	0.0128001		8.13792	-0.514232		8.13792	0.0169948		8.13458	-0.895947
	8.79126	3.05874		8.79126	3.09426		8.79126	3.27677		8.79126	3.13642			8.14125	0.012584		8.14458	-0.514261		8.14458	0.0178739		8.14125	-0.896804
	8.79846	3.06262		8.79846	3.09767		8.79846	3.28184		8.79846	3.13765			8.14792	0.0127554		8.15125	-0.514254		8.15125	0.0187382		8.14792	-0.897728
	8.80566	3.06627		8.80566	3.10125		8.80566	3.28707		8.80566	3.13888			8.15458	0.0131726		8.15792	-0.514671		8.15792	0.0193268		8.15458	-0.898398
	8.81286	3.06945		8.81286	3.10461		8.81286	3.29229		8.81286	3.14034			8.16125	0.0136048		8.16458	-0.515282		8.16458	0.0195354		8.16125	-0.898838
	8.82006	3.07198		8.82006	3.1075		8.82006	3.29745		8.82006	3.14216			8.16792	0.0136048		8.17125	-0.515759		8.17125	0.0188947		8.16792	-0.898801
	8.82726	3.07378		8.82726	3.10992		8.82726	3.30266		8.82726	3.14432			8.17458	0.0135899		8.17792	-0.515617		8.17792	0.0181198		8.17458	-0.89895
	8.83446	3.07491		8.83446	3.112		8.83446	3.30814		8.83446	3.14679			8.18125	0.0138506		8.18458	-0.515103		8.18458	0.0177026		8.18125	-0.899419
	8.84166	3.07553		8.84166	3.11393		8.84166	3.31427		8.84166	3.14951			8.18792	0.0143871		8.19125	-0.514381		8.19125	0.0172555		8.18792	-0.899911
[truncated: 2,521 more rows]

## Sheet: rep 3
2019-10-12
	TMR signals																			TMR signals
[truncated: 3,754 more rows]
