# Supplementary material for: Unstructured regions in IRE1α specify BiP-mediated destabilisation of the luminal domain dimer and repression of the UPR
Source: eLife. 2019 Dec 24;8:e50793. doi: 10.7554/eLife.50793 (PMC6996924; doi:10.7554/eLife.50793)
Supplement: Figure 2—source data 2. [file elife-50793-fig2-data2.xlsx]

## Sheet: Sheet1
		Anisotropy			Anisotropy
	[IRE1 LD Q105C ox. UK2304] (uM)	rep1	rep2	rep3
	340	0.244651	0.24785	0.242709
	300	0.24077	0.243897	0.241856
	200	0.219207	0.221937	0.220952
	100	0.175786	0.181003	0.180654
	75	0.156443	0.163069	0.161834
	50	0.132268	0.13569	0.136133
	40	0.116957	0.124842	0.120441
	30	0.100712	0.108815	0.103031
	20	0.080984	0.0884271	0.0863388
	10	0.056356	0.0633571	0.0604312
	7.5	0.0496105	0.0550627	0.0551526
	5	0.0390951	0.0450608	0.0453156
	4	0.0349378	0.0402413	0.0414468
	3	0.0310676	0.0382189	0.0370655
	2	0.0293008	0.0343174	0.0342251
	1	0.0227386	0.0290361	0.0288268
	0.75	0.0207656	0.0278707	0.0285765
	0.5	0.0194159	0.0251385	0.0254897
					Anisotropy
	[IRE1 LD wt UK2042] (uM)				rep1	rep2	rep3
	326.2				0.198766	0.201966	0.194065
	299.6				0.196895	0.200898	0.183638
	200.2				0.177258	0.173041	0.162842
	99.4				0.138043	0.139258	0.128445
	75.6				0.118871	0.120381	0.109913
	50.4				0.0989798	0.0992577	0.0878893
	40.6				0.0874232	0.0881793	0.081939
	29.4				0.0716487	0.0690231	0.0657553
	20.02				0.0571953	0.0554039	0.0484174
	9.94				0.0385555	0.0387998	0.02751
	7.56				0.0322976	0.0319415	0.0195268
	5.04				0.0288018	0.0301719	0.0142281
	4.06				0.0289824	0.0246635	0.0130768
	2.94				0.0219595	0.0212346	0.000557003
	2.002				0.0165094	0.018721	-0.00287494
	0.994				0.0150007	0.0184837	-0.00247756
	0.756				0.0125218	0.016199	-0.00176808
