# Supplementary material for: Unstructured regions in IRE1α specify BiP-mediated destabilisation of the luminal domain dimer and repression of the UPR
Source: eLife. 2019 Dec 24;8:e50793. doi: 10.7554/eLife.50793 (PMC6996924; doi:10.7554/eLife.50793)
Supplement: Figure 3—source data 1. [file elife-50793-fig3-data1.xlsx]

## Sheet: Sheet1
% of exchange in peptic peptides
		IRE1 wt (UK2042) alone 30s			IRE1 wt (UK2042) alone 300s
	Peptic peptide	rep1	rep2	rep3	rep1	rep2	rep3
	425-444	95.5503	95.1879	94.2755	95.1932	94.5307	94.1604
	410-443	94.9994	95.7144	93.677	94.6894	95.997	93.8789
	410-424	93.8891	95.1737	93.5974	94.0031	96.9596	94.1836
	379-404	93.9285	95.3303	92.2988	94.2572	95.0949	92.7235
	365-378	88.2616	89.3637	87.7656	94.3579	95.448	93.5385
	343-360	94.1279	95.1897	93.2963	93.2541	94.7747	92.7738
	317-335	96.5904	95.2313	94.4908	96.641	95.7257	94.5505
	303-316	81.7301	83.1296	82.0923	93.8872	93.9069	92.8632
	297-302	13.3838	13.1689	12.4735	68.5331	67.8328	67.5617
	288-296	64.4782	65.0112	64.574	89.2763	88.4652	88.8291
	280-287	39.6076	39.8665	39.5025	77.8603	78.631	78.2322
	259-279	95.9599	95.0827	94.3916	97.148	94.2373	94.2149
	253-258	74.3402	73.3068	73.3565	92.3736	91.7951	92.159
	241-248	27.3467	28.1788	27.8566	37.5273	37.5134	37.9422
	233-240	60.7033	61.945	62.1823	77.7995	76.4437	77.5747
	221-232	20.4368	20.2192	20.2894	25.1053	25.0082	25.2444
	209-221	37.0346	37.725	38.0536	44.0048	43.3088	43.3605
	196-208	40.4407	40.9996	40.7055	47.8299	47.7429	47.9254
	186-195	94.038	93.481	93.5891	93.4627	91.1927	94.4109
	176-183	19.7583	20.6664	20.3856	33.2026	33.3165	33.2371
	168-175	54.2662	57.0995	54.3684	84.9278	83.6156	81.5489
	157-168	1.113	1.06081	1.22173	2.69339	2.78311	2.93992
	147-157	79.8036	79.9046	79.4864	80.8161	81.2005	80.6419
	134-145	77.6526	78.5433	77.8204	93.7476	94.3084	92.9904
	130-134	5.42887	6.31446	6.34169	31.8265	33.6497	34.6803
	120-128	8.52524	8.70887	8.12473	27.6389	28.5428	29.0079
	107-119	43.254	44.5178	43.1395	67.1161	67.4753	67.6502
	96-106	14.7296	14.8314	15.0073	23.1655	24.0405	24.1326
	86-106	48.3084	49.3886	48.6174	57.0357	57.9735	56.9358
	77-85	9.52821	9.82465	9.47211	19.7342	19.6126	19.996
	46-59	44.3097	44.769	43.8698	45.1668	45.3505	45.2405
	37-45	13.7779	15.0919	13.0235	27.3931	28.0115	27.0453
	24-36	86.4835	86.4295	86.4732	91.7138	91.5443	91.6226
