# Supplementary material for: Unstructured regions in IRE1α specify BiP-mediated destabilisation of the luminal domain dimer and repression of the UPR
Source: eLife. 2019 Dec 24;8:e50793. doi: 10.7554/eLife.50793 (PMC6996924; doi:10.7554/eLife.50793)
Supplement: Figure 4—source data 1. [file elife-50793-fig4-data1.xlsx]

## Sheet: Table
		rep 1						rep 2						rep 3						rep 4
		wt3+stress	dloop repair + stress	drv repair + stress	both repair + stress			wt3+stress	dloop repair + stress	drv repair + stress	both repair + stress			wt3+stress	dloop repair + stress	drv repair + stress	both repair + stress			wt3+stress	dloop repair + stress	drv repair + stress	both repair + stress
Q2 Median GFP		1504	2183	2473	2252			1487	2421	2263	2413			1529	2274	2381	2162			1463	2219	2215	2429
Q2 Media Turq		3660	8191	7534	10323			3630	7671	7196	9779			3372	7509	7671	9699			3416	7658	6975	9083
Q3 Median GFP		1379						1379						1365						1345
Q3 Median Turq		209						200						211						210
		wt3	dloop repair	drv repair	both repair			wt3	dloop repair	drv repair	both repair			wt3	dloop repair	drv repair	both repair			wt3	dloop repair	drv repair	both repair
Q2 Median GFP		212	239	231	341			201	240	222	334			204	243	224	353			204	230	227	323
Q2 Media Turq		851	2465	2018	4950			846	2374	1896	4991			870	2461	1918	5785			881	2354	1790	5032
Q3 Median GFP		128						118						122						123
Q3 Median Turq		222						215						212						212
									Median GFP				Median Turq
								wt3	128	118	122	123	222	215	212	212
								dloop repair	239	240	243	230	2465	2374	2461	2354
								drv repair	231	222	224	227	2018	1896	1918	1790
								both repair	341	334	353	323	4950	4991	5785	5032
								wt3+stress	1504	1487	1529	1463	3660	3630	3372	3416
								dloop repair + stress	2183	2421	2274	2219	8191	7671	7509	7658
								drv repair + stress	2473	2263	2381	2215	7534	7196	7671	6975
								both repair + stress	2252	2413	2162	2429	10323	9779	9699	9083
								wt repair + stress	2518	2526	2658	2715	6077	5462	5756	5338
								empty vector repair + stress	1886	1838	1978	2004	205	192	206	199
								normalised	Median GFP				Median Turq
								wt3	1	1	1	1	1	1	1	1
								dloop repair	1.86719	2.0339	1.9918	1.86992	11.1036	11.0419	11.6085	11.1038
								drv repair	1.80469	1.88136	1.83607	1.84553	9.09009	8.8186	9.04717	8.4434
								both repair	2.66406	2.83051	2.89344	2.62602	22.2973	23.214	27.2877	23.7358
								wt3+stress	11.75	12.6017	12.5328	11.8943	16.4865	16.8837	15.9057	16.1132
								dloop repair + stress	17.0547	20.5169	18.6393	18.0407	36.8964	35.6791	35.4198	36.1226
								drv repair + stress	19.3203	19.178	19.5164	18.0081	33.9369	33.4698	36.184	32.9009
								both repair + stress	17.5938	20.4492	17.7213	19.748	46.5	45.4837	45.75	42.8443
								wt repair + stress	19.6719	21.4068	21.7869	22.0732	27.3739	25.4047	27.1509	25.1792
								empty vector repair + stress	14.7344	15.5763	16.2131	16.2927	0.923423	0.893023	0.971698	0.938679
