# Supplementary material for: Unstructured regions in IRE1α specify BiP-mediated destabilisation of the luminal domain dimer and repression of the UPR
Source: eLife. 2019 Dec 24;8:e50793. doi: 10.7554/eLife.50793 (PMC6996924; doi:10.7554/eLife.50793)
Supplement: Figure 4—source data 2. [file elife-50793-fig4-data2.xlsx]

## Sheet: Sheet1
	sample	IRE1 LD-GST wt			IRE1 LD-GST ∆loop			IRE1 LD-GST ∆tail			IRE1 LD-GST ∆∆
		rep1	rep2	rep3	rep1	rep2	rep3	rep1	rep2	rep3	rep1	rep2	rep3
	Ratio BiP/IRE1 signals	1.00111	1.04207	0.931623	0.767982	0.364738	0.513773	0.600642	0.446599	0.25183	0.178507	0.212548	0.158631
