# Supplementary material for: Unstructured regions in IRE1α specify BiP-mediated destabilisation of the luminal domain dimer and repression of the UPR
Source: eLife. 2019 Dec 24;8:e50793. doi: 10.7554/eLife.50793 (PMC6996924; doi:10.7554/eLife.50793)
Supplement: Figure 5—figure supplement 1—source data 1. [file elife-50793-fig5-figsupp1-data1.xlsx]

## Sheet: rep1
2019-07-31
raw data
J-IRE1 P108A		J-IRE1 Q105C ox.
Time (s)	Displacement	Time (s)	Displacement
0	0	0	0	equilibrate in reaction buffer
0.19	0.00080723	0.19	-0.00419075
0.39	0.00036306	0.39	-0.00462979
0.59	-0.00169449	0.59	-0.00582797
0.79	-0.00226742	0.79	-0.0057239
0.99	-0.00023312	0.99	-0.00684434
1.19	-0.00118202	1.19	-0.0049545
1.39	0.00110007	1.39	-0.00325763
1.59	0.00258962	1.59	-0.00868216
1.79	0.0003255	1.79	-0.00271291
1.99	-0.00277302	1.99	-0.00111878
2.19	-0.00189027	2.19	-0.00227942
2.39	0.0011154	2.39	-0.002986
2.59	-0.00302944	2.59	-0.00339587
2.79	0.00346804	2.79	-0.00177098
2.99	0.00226281	2.99	-0.00695587
3.19	-0.00036242	3.19	-0.00145253
3.39	-0.00231418	3.39	-0.00728975
3.59	0.00118846	3.59	-0.00416482
3.79	-0.00018469	3.79	0.0001821
3.99	0.0028221	3.99	-0.00656969
4.19	0.00236742	4.19	-0.00242955
4.39	0.00322191	4.39	0.00115923
4.59	0.00195085	4.59	0.00066572
4.79	0.00231022	4.79	0.00072103
4.99	0.00023045	4.99	-0.0021435
5.19	0.00098525	5.19	-0.00212269
5.39	0.00255235	5.39	-0.00444409
5.59	0.00202545	5.59	0.00402652
5.79	8.512e-05	5.79	-0.00335386
5.99	0.00309708	5.99	0.00234313
6.19	0.00109287	6.19	-0.00148848
6.39	-0.00246509	6.39	0.00181652
6.59	0.00110522	6.59	-0.00315879
6.79	0.00431993	6.79	0.00103907
6.99	0.00112137	6.99	0.0007363
7.19	-0.00289528	7.19	0.0005438
7.39	0.00343647	7.39	0.00053365
7.59	-0.00229779	7.59	-0.00272438
7.79	0.001424	7.79	-0.00069878
7.99	0.00059375	7.99	-0.00184826
8.19	0.00330647	8.19	-0.00070628
8.39	0.00298573	8.39	0.00106858
8.59	0.00468261	8.59	0.00182225
8.79	0.00227819	8.79	0.0022792
8.99	0.00146888	8.99	0.00327409
9.19	0.00173481	9.19	0.00129261
9.39	-0.00018153	9.39	0.00111007
9.59	0.00424854	9.59	0.00060969
9.79	0.00108164	9.79	-0.00088039
9.99	-0.00202684	9.99	0.00066018
10.19	-0.00143087	10.19	0.00112726
10.39	0.00321169	10.39	0.00157795
10.59	0.00351657	10.59	0.00077127
10.79	4.562e-05	10.79	-0.00306838
10.99	0.00261559	10.99	0.00319626
11.19	0.00231142	11.19	0.00240292
11.39	-7.476e-05	11.39	0.00439776
11.59	0.0043641	11.59	0.00552003
11.79	-0.00030832	11.79	0.00280651
11.99	0.00262852	11.99	0.00247971
12.19	0.00057518	12.19	0.00418191
12.39	0.00629282	12.39	0.00417212
12.59	0.00164851	12.59	0.0053633
12.79	0.00033015	12.79	0.00619699
12.99	0.00627711	12.99	0.00837177
13.19	0.0016029	13.19	0.00567803
13.39	0.00140065	13.39	0.00106332
13.59	0.00426009	13.59	0.00490506
13.79	-0.00103428	13.79	0.00244867
13.99	0.00486553	13.99	0.00329215
14.19	0.0030503	14.19	0.00715934
14.39	-0.00021528	14.39	0.00272847
14.59	0.00310277	14.59	0.00090811
14.79	0.0033913	14.79	0.0029765
14.99	0.00105494	14.99	0.00867948
15.19	0.00192739	15.19	-0.00135771
15.39	0.0017275	15.39	0.00189772
15.59	0.00370366	15.59	0.00821143
15.79	0.00334385	15.79	0.00344431
15.99	0.00127531	15.99	0.00628401
16.19	0.00324315	16.19	0.00294635
16.39	0.00089275	16.39	0.00596289
16.59	0.00599133	16.59	0.00468096
16.79	0.00090583	16.79	0.0066632
16.99	0.00342875	16.99	0.00326137
17.19	0.00289873	17.19	0.00784305
17.39	0.00268802	17.39	0.00276386
17.59	0.00168944	17.59	0.00183204
17.79	0.00234457	17.79	0.00228303
17.99	0.00063951	17.99	0.00873595
18.19	0.00380824	18.19	0.00555497
18.39	0.00515086	18.39	0.00460604
18.59	0.00532926	18.59	0.00402978
18.79	0.00334449	18.79	0.00504638
18.99	0.0006601	18.99	0.0084775
19.19	0.00260753	19.19	0.00330308
19.39	0.00465333	19.39	0.0033637
19.59	0.00278963	19.59	0.00895336
19.79	0.00305252	19.79	0.00663967
19.99	0.00156258	19.99	0.00641621
20.19	0.00523581	20.19	0.00744327
20.39	0.00179302	20.39	0.00598537
20.59	0.00306386	20.59	0.00769907
20.79	0.00215406	20.79	0.00680636
20.99	0.00566852	20.99	0.00701539
21.19	0.00459395	21.19	0.00576617
21.39	0.00127095	21.39	0.0057329
21.59	0.00566463	21.59	0.00724883
21.79	0.00439535	21.79	0.00403417
21.99	0.00193882	21.99	0.00445135
22.19	0.00371364	22.19	0.00467654
22.39	0.00506989	22.39	0.00180683
22.59	0.00638548	22.59	0.00657671
22.79	0.00266041	22.79	0.0096995
22.99	0.00308499	22.99	0.005021
23.19	0.00245914	23.19	0.00577849
23.39	0.00490944	23.39	0.00494448
23.59	0.00552689	23.59	0.0101932
23.79	0.00564675	23.79	0.00817388
23.99	0.00611357	23.99	0.00752337
24.19	0.00102207	24.19	0.00428194
24.39	0.00329645	24.39	0.00502118
24.59	0.0058654	24.59	0.00402355
24.79	-0.00098003	24.79	0.0087386
24.99	0.00153516	24.99	0.00855457
25.19	0.00111909	25.19	0.0065234
25.39	0.00388695	25.39	0.0106913
25.59	0.0043961	25.59	0.00915931
25.79	0.00356457	25.79	0.0123202
25.99	0.00379944	25.99	0.00658651
26.19	0.00424453	26.19	0.00933924
26.39	0.00213598	26.39	0.0118364
26.59	0.0051266	26.59	0.00963568
26.79	0.00311901	26.79	0.00788888
26.99	0.00265122	26.99	0.0060157
27.19	0.00319369	27.19	0.013841
27.39	0.00235406	27.39	0.0105349
27.59	0.00035843	27.59	0.00984145
27.79	0.00666936	27.79	0.00727744
27.99	0.00495962	27.99	0.00738761
28.19	0.0040577	28.19	0.0126748
28.39	0.00536491	28.39	0.00750687
28.59	0.00217516	28.59	0.00927537
28.79	0.00832568	28.79	0.0099571
28.99	0.00305802	28.99	0.00618229
29.19	0.00400346	29.19	0.0092989
29.39	0.00356156	29.39	0.0109846
29.59	0.0025526	29.59	0.00977857
29.79	0.00346055	29.79	0.00551052
29.99	0.0041718	29.99	0.00950923
30.19	0.0046403	30.19	0.0113827
30.39	0.00321862	30.39	0.0131328
30.59	0.00526835	30.59	0.00841895
30.79	0.00298255	30.79	0.00883177
30.99	0.00659754	30.99	0.00802641
31.19	0.00272441	31.19	0.00901477
31.39	0.00339339	31.39	0.00741871
31.59	0.00387558	31.59	0.00959749
31.79	0.00392579	31.79	0.014578
31.99	0.00470594	31.99	0.0144726
32.19	0.00578703	32.19	0.0103518
32.39	0.00245323	32.39	0.00915064
32.59	0.00178957	32.59	0.0157339
32.79	0.00501845	32.79	0.00990224
32.99	0.00605803	32.99	0.0114918
33.19	0.00473624	33.19	0.00799965
33.39	0.00750467	33.39	0.0119316
33.59	0.00560353	33.59	0.0114536
33.79	0.0041027	33.79	0.0113002
33.99	0.00373845	33.99	0.0142755
34.19	0.0014081	34.19	0.010815
34.39	0.00726327	34.39	0.0101131
34.59	0.00401971	34.59	0.00944123
34.79	0.00335042	34.79	0.0120869
34.99	0.0021842	34.99	0.0121288
35.19	0.00513505	35.19	0.0148486
35.39	0.00130023	35.39	0.0115088
35.59	0.0036041	35.59	0.0125473
35.79	0.00517932	35.79	0.0145732
35.99	0.00613656	35.99	0.00770281
36.19	0.00465051	36.19	0.00959016
36.39	0.00464983	36.39	0.0106609
36.59	0.00272437	36.59	0.0123633
36.79	0.00483387	36.79	0.0100989
36.99	0.00373304	36.99	0.0112128
37.19	0.00019675	37.19	0.0123725
37.39	0.00419032	37.39	0.0127075
37.59	0.00430471	37.59	0.014422
37.79	0.00237887	37.79	0.0120361
37.99	0.00501191	37.99	0.0113577
38.19	0.00155855	38.19	0.0117937
38.39	0.00438495	38.39	0.0157317
38.59	0.00422718	38.59	0.0069066
38.79	0.00232574	38.79	0.00965084
38.99	0.00273612	38.99	0.0133869
39.19	0.00593347	39.19	0.00915229
39.39	0.00398315	39.39	0.0120064
39.59	0.00220826	39.59	0.0123419
39.79	0.00381399	39.79	0.0109394
39.99	0.00343127	39.99	0.0105216
40.19	0.00112089	40.19	0.0125182
40.39	0.0036729	40.39	0.0148621
40.59	0.00603237	40.59	0.0140939
40.79	0.00229742	40.79	0.0132449
40.99	0.00719403	40.99	0.0128439
41.19	0.00425585	41.19	0.0173677
41.39	0.00492368	41.39	0.0123125
41.59	0.00172058	41.59	0.0113116
41.79	0.00271648	41.79	0.0109892
41.99	0.00401845	41.99	0.0119571
42.19	0.00487374	42.19	0.0124898
42.39	0.00598375	42.39	0.0097256
42.59	0.00337111	42.59	0.0116195
42.79	0.00550599	42.79	0.0137941
42.99	0.00475676	42.99	0.0137037
43.19	0.00586764	43.19	0.0154877
43.39	0.00517633	43.39	0.0131042
43.59	0.00218847	43.59	0.0136262
43.79	0.00440988	43.79	0.0138196
43.99	0.00385845	43.99	0.009886
44.19	0.00228213	44.19	0.0120289
44.39	0.00615546	44.39	0.0156672
44.59	0.00381152	44.59	0.0135582
44.79	0.00397155	44.79	0.0104117
44.99	0.00262674	44.99	0.0126018
45.19	-0.00095021	45.19	0.0126485
45.39	0.00442405	45.39	0.0120412
45.59	0.00220387	45.59	0.011865
45.79	0.00390334	45.79	0.0114349
45.99	0.00492775	45.99	0.0102566
46.19	0.00423019	46.19	0.0095828
46.39	0.00543807	46.39	0.01255
46.59	0.00247071	46.59	0.0118284
46.79	0.00406969	46.79	0.0148022
46.99	0.00553927	46.99	0.0142433
47.19	0.0038261	47.19	0.011517
47.39	0.00508684	47.39	0.0123157
47.59	0.00370017	47.59	0.0139503
47.79	0.00393748	47.79	0.00952496
47.99	0.00343626	47.99	0.0131591
48.19	0.00497106	48.19	0.0108728
48.39	0.00748378	48.39	0.0106532
48.59	0.0015931	48.59	0.0156947
48.79	0.00663592	48.79	0.0135751
48.99	0.00597675	48.99	0.0125476
49.19	0.00379212	49.19	0.00901915
49.39	0.00315692	49.39	0.0167109
49.59	0.00354474	49.59	0.0119865
49.79	0.00654034	49.79	0.0126563
49.99	0.00503919	49.99	0.0152693
50.19	0.00103531	50.19	0.00922209
50.39	0.00802247	50.39	0.0137854
50.59	0.00570717	50.59	0.0119144
50.79	0.00533282	50.79	0.011208
50.99	0.00343067	50.99	0.0135539
51.19	0.00357254	51.19	0.0124797
51.39	0.00216142	51.39	0.0165177
51.59	0.00319925	51.59	0.0142137
51.79	0.00502814	51.79	0.0128478
51.99	0.00731491	51.99	0.0142678
52.19	0.0030987	52.19	0.0128652
52.39	0.00343801	52.39	0.013783
52.59	0.00606289	52.59	0.0155795
52.79	0.00333291	52.79	0.0136462
52.99	0.0030608	52.99	0.0146276
53.19	0.00337708	53.19	0.0139444
53.39	0.00737588	53.39	0.0131992
53.59	0.00662135	53.59	0.0139246
53.79	0.0042669	53.79	0.0129287
53.99	0.00463474	53.99	0.012846
54.19	0.00731187	54.19	0.0182612
54.39	0.00417712	54.39	0.0158624
54.59	0.00553189	54.59	0.0109365
54.79	0.00313242	54.79	0.0128267
54.99	0.00232302	54.99	0.0161597
55.19	0.00345345	55.19	0.0127334
55.39	0.00239859	55.39	0.0155994
55.59	0.00455199	55.59	0.00990142
55.79	0.00576749	55.79	0.0185186
55.99	0.00243337	55.99	0.0131675
56.19	0.00422353	56.19	0.0125165
56.39	0.00405204	56.39	0.0101698
56.59	0.00333403	56.59	0.0141871
56.79	0.00540307	56.79	0.013201
56.99	0.0057023	56.99	0.0123223
57.19	0.00708761	57.19	0.0147575
57.39	0.0049188	57.39	0.0156063
57.59	0.00730464	57.59	0.0113434
57.79	0.00570421	57.79	0.0178393
57.99	0.00480226	57.99	0.0134813
58.19	0.00580619	58.19	0.0122662
58.39	0.00580654	58.39	0.0129234
58.59	0.0027304	58.59	0.0145603
58.79	0.00269817	58.79	0.0130105
58.99	0.00445474	58.99	0.015521
59.19	-6.914e-05	59.19	0.0134647
59.39	0.00331277	59.39	0.0135004
59.59	0.00433794	59.59	0.0159891
59.79	0.00515006	59.79	0.0117542
59.99	0.00339422	59.99	0.0137764
60.19	0.00275621	60.19	0.0148376
60.39	0.00487901	60.39	0.0150102
60.59	0.00300068	60.59	0.00965506
60.79	0.00120953	60.79	0.0137036
60.99	0.00319424	60.99	0.0136409
61.19	0.00104742	61.19	0.0155698
61.39	0.00662701	61.39	0.0159388
61.59	0.00571459	61.59	0.0189565
61.79	0.00471817	61.79	0.013361
61.99	0.00648326	61.99	0.0190539
62.19	0.00402043	62.19	0.0145595
62.39	0.00358424	62.39	0.016662
62.59	0.00389821	62.59	0.0164231
62.79	0.0036508	62.79	0.012796
62.99	0.00667271	62.99	0.0141627
63.19	0.00418024	63.19	0.0161457
63.39	0.00251269	63.39	0.015343
63.59	0.00561949	63.59	0.0164397
63.79	0.00299317	63.79	0.0171063
63.99	0.00333164	63.99	0.0153719
64.19	0.00681107	64.19	0.0165605
64.39	0.00282982	64.39	0.017355
64.59	0.00425994	64.59	0.0149628
64.79	0.00227849	64.79	0.0183363
64.99	0.00751417	64.99	0.0171157
65.19	0.00332798	65.19	0.0165714
65.39	0.00455779	65.39	0.0147505
65.59	0.00210832	65.59	0.0143579
65.79	0.0069168	65.79	0.0162472
65.99	0.00374638	65.99	0.0135381
66.19	0.00515285	66.19	0.0109699
66.39	0.0060369	66.39	0.0192365
66.59	0.00435796	66.59	0.0094674
66.79	0.00329271	66.79	0.0170692
66.99	0.00645857	66.99	0.0142599
67.19	0.00352706	67.19	0.0151442
67.39	0.00332968	67.39	0.0157192
67.59	0.00082718	67.59	0.0163403
67.79	0.00561573	67.79	0.0153571
67.99	0.00686904	67.99	0.0164644
68.19	0.00519398	68.19	0.0156783
68.39	0.00462445	68.39	0.0156585
68.59	0.00605581	68.59	0.0126106
68.79	0.003748	68.79	0.0153337
68.99	0.00650004	68.99	0.0149517
69.19	0.00599566	69.19	0.0167109
69.39	0.00600197	69.39	0.0159671
69.59	0.00453887	69.59	0.0164816
69.79	0.00430667	69.79	0.0151452
69.99	0.00263145	69.99	0.0170946
70.19	0.00240046	70.19	0.0166617
70.39	0.00214171	70.39	0.0172189
70.59	0.00087245	70.59	0.0146634
70.79	0.00349006	70.79	0.0159835
70.99	0.00149606	70.99	0.0152367
71.19	0.00584302	71.19	0.0140559
71.39	0.00260336	71.39	0.0184711
71.59	0.00470301	71.59	0.0177262
71.79	0.00312388	71.79	0.0119908
71.99	0.00655464	71.99	0.0159815
72.19	0.00443363	72.19	0.0133154
72.39	0.00953044	72.39	0.0181853
72.59	0.00268921	72.59	0.0130164
72.79	0.00220787	72.79	0.0189572
72.99	0.00144848	72.99	0.0181975
73.19	0.00280347	73.19	0.0150064
73.39	0.00185741	73.39	0.0163032
73.59	0.00505041	73.59	0.0176824
73.79	0.00384242	73.79	0.0184236
73.99	0.00209212	73.99	0.0136363
74.19	0.00546073	74.19	0.0174859
74.39	0.00476885	74.39	0.0157074
74.59	0.00492732	74.59	0.0100743
74.79	0.00399575	74.79	0.0206021
74.99	0.00372006	74.99	0.0178028
75.19	0.00554542	75.19	0.0128979
75.39	0.00707198	75.39	0.0164133
75.59	0.00720337	75.59	0.0157076
75.79	0.00346695	75.79	0.0149538
75.99	0.00553726	75.99	0.0150058
76.19	0.00179249	76.19	0.0181337
76.39	0.00427082	76.39	0.0156943
76.59	0.00632499	76.59	0.0173119
76.79	0.00734625	76.79	0.0182999
76.99	0.00212216	76.99	0.0166686
77.19	0.00560348	77.19	0.0160816
77.39	0.00585077	77.39	0.0172678
77.59	0.00279592	77.59	0.0164464
77.79	0.00575456	77.79	0.0173561
77.99	0.0031075	77.99	0.0177189
78.19	0.00201022	78.19	0.013555
78.39	0.00593979	78.39	0.0158951
78.59	0.00405196	78.59	0.0151787
78.79	0.0038253	78.79	0.0169709
78.99	0.00818728	78.99	0.0161976
79.19	0.00364511	79.19	0.0167251
79.39	0.00197654	79.39	0.0179014
79.59	0.00515118	79.59	0.0141443
79.79	0.00696456	79.79	0.0164338
79.99	0.00126847	79.99	0.0150355
80.19	0.00721699	80.19	0.0148701
80.39	0.00321886	80.39	0.0176552
80.59	0.00120334	80.59	0.0182534
80.79	0.00505867	80.79	0.0169863
80.99	0.00685726	80.99	0.0178531
81.19	0.00464463	81.19	0.0177703
81.39	0.00167984	81.39	0.0195569
81.59	0.00204742	81.59	0.0154658
81.79	0.0044256	81.79	0.0170134
81.99	0.00532818	81.99	0.0174273
82.19	0.00464066	82.19	0.0134712
82.39	0.00572498	82.39	0.017861
82.59	0.00734383	82.59	0.0169918
82.79	0.00451439	82.79	0.0126102
82.99	0.009278	82.99	0.0197175
83.19	0.00465022	83.19	0.0125477
83.39	0.00351448	83.39	0.0165063
83.59	0.00390028	83.59	0.0179099
83.79	0.00852627	83.79	0.0131833
83.99	0.0095991	83.99	0.0184085
84.19	0.00504135	84.19	0.0197053
84.39	0.00436192	84.39	0.014198
84.59	0.0039022	84.59	0.0168108
84.79	0.00722548	84.79	0.0199927
84.99	0.00337874	84.99	0.0175863
85.19	0.00451676	85.19	0.015469
85.39	0.00357622	85.39	0.0180479
85.59	0.00276746	85.59	0.0152094
85.79	0.00405235	85.79	0.015861
85.99	0.00097124	85.99	0.0186409
86.19	0.00303754	86.19	0.0172798
86.39	0.00277672	86.39	0.0139186
86.59	0.00313779	86.59	0.0183441
86.79	0.00215707	86.79	0.012515
86.99	0.00465684	86.99	0.0153016
87.19	0.00430276	87.19	0.0159153
87.39	0.0048213	87.39	0.0204033
87.59	0.00582678	87.59	0.018916
87.79	0.00382846	87.79	0.0162248
87.99	0.00254851	87.99	0.0153047
88.19	0.00415278	88.19	0.0176678
88.39	0.0020463	88.39	0.0159716
88.59	0.00185099	88.59	0.0153243
88.79	0.00321426	88.79	0.0162573
88.99	0.00261561	88.99	0.0131846
89.19	0.00353792	89.19	0.0185418
89.39	0.00435399	89.39	0.0142134
89.59	0.00346886	89.59	0.017037
89.79	0.00222865	89.79	0.0158707
89.99	0.00695412	89.99	0.0168643
90.19	0.00580527	90.19	0.017764
90.39	0.00044309	90.39	0.0144657
90.59	0.00390283	90.59	0.017245
90.79	0.00616537	90.79	0.0164997
90.99	0.00362667	90.99	0.0156518
91.19	0.00338652	91.19	0.0187425
91.39	0.00840075	91.39	0.0172811
91.59	0.00216286	91.59	0.0152209
91.79	0.00458351	91.79	0.0156116
91.99	0.00166708	91.99	0.015045
92.19	0.0067633	92.19	0.0151687
92.39	0.00627386	92.39	0.0155339
92.59	0.00062928	92.59	0.0173267
92.79	0.00590531	92.79	0.0115385
92.99	0.00454957	92.99	0.0184378
93.19	0.00343196	93.19	0.0186822
93.39	0.00426999	93.39	0.0153038
93.59	0.00407213	93.59	0.0219447
93.79	0.00130702	93.79	0.0174439
93.99	0.00129606	93.99	0.0163566
94.19	0.00376134	94.19	0.0141678
94.39	0.00306558	94.39	0.0173982
94.59	0.00471944	94.59	0.0155131
94.79	0.00255524	94.79	0.0177956
94.99	0.00746418	94.99	0.0179881
95.19	0.00385718	95.19	0.017186
95.39	0.00368524	95.39	0.0215489
95.59	0.00434172	95.59	0.0152696
95.79	0.00152549	95.79	0.0175282
95.99	0.0028004	95.99	0.018952
96.19	0.00458935	96.19	0.0174968
96.39	0.00850029	96.39	0.020106
96.59	0.0038048	96.59	0.0184388
96.79	0.00412055	96.79	0.0228903
96.99	0.00011106	96.99	0.0181435
97.19	0.00159855	97.19	0.0175946
97.39	0.0052205	97.39	0.0147285
97.59	0.0040263	97.59	0.0176067
97.79	0.00343451	97.79	0.0183392
97.99	0.00157154	97.99	0.0192789
98.19	0.00459868	98.19	0.0157965
98.39	0.00331651	98.39	0.0182406
98.59	0.00213203	98.59	0.0139111
98.79	0.00451154	98.79	0.0185233
98.99	0.00315437	98.99	0.0184178
99.19	0.0056603	99.19	0.0155994
99.39	0.00188374	99.39	0.0149958
99.59	0.00457374	99.59	0.0164469
99.79	0.00352582	99.79	0.0197336
99.99	0.00223641	99.99	0.017028
100.19	0.00338595	100.19	0.0161637
100.39	0.00396405	100.39	0.0167645
100.59	0.00559678	100.59	0.0171752
100.79	0.00554612	100.79	0.0174654
100.99	0.00310642	100.99	0.0155852
101.19	0.00389713	101.19	0.0141049
101.39	0.00647542	101.39	0.0182009
101.59	0.00185731	101.59	0.0193005
101.79	0.00405703	101.79	0.0145634
101.99	0.00847075	101.99	0.0165561
102.19	0.00021386	102.19	0.0169541
102.39	0.00554329	102.39	0.0226998
102.59	0.00733117	102.59	0.0187927
102.79	0.00479998	102.79	0.0153832
102.99	0.0038709	102.99	0.0196
103.19	0.00428699	103.19	0.0199996
103.39	0.0056746	103.39	0.0184769
103.59	0.00290521	103.59	0.0188483
103.79	0.00748342	103.79	0.0175445
103.99	0.00103469	103.99	0.0181875
104.19	0.00494144	104.19	0.0198697
104.39	0.00107618	104.39	0.0177266
104.59	0.00274091	104.59	0.0200139
104.79	0.004352	104.79	0.0172088
104.99	0.00106762	104.99	0.0187536
105.19	0.004946	105.19	0.0174605
105.39	0.00605242	105.39	0.0174121
105.59	0.00669283	105.59	0.0170622
105.79	0.00266207	105.79	0.0199077
105.99	0.00239602	105.99	0.0224652
106.19	0.00680315	106.19	0.017629
106.39	0.00190514	106.39	0.0176526
106.59	0.00614314	106.59	0.0207763
106.79	0.00688055	106.79	0.0187465
106.99	0.00603282	106.99	0.0208165
107.19	0.00507989	107.19	0.0207691
107.39	0.00533808	107.39	0.0171081
107.59	0.00288256	107.59	0.0189017
107.79	0.00179037	107.79	0.0190234
107.99	0.00388697	107.99	0.0189473
108.19	0.00160133	108.19	0.0177116
108.39	0.00494209	108.39	0.0184486
108.59	0.00266847	108.59	0.017205
108.79	0.00206235	108.79	0.0150025
108.99	0.00496423	108.99	0.0185655
109.19	0.0012775	109.19	0.0172754
109.39	0.00175676	109.39	0.0182952
109.59	0.00285216	109.59	0.0198408
109.79	0.00242701	109.79	0.0171985
109.99	0.00416663	109.99	0.0195059
110.19	0.00663476	110.19	0.0161058
110.39	0.00476655	110.39	0.0192333
110.59	0.00217711	110.59	0.0162552
110.79	0.00640259	110.79	0.0177887
110.99	0.0057159	110.99	0.0166257
111.19	0.0019906	111.19	0.0161593
111.39	0.00312832	111.39	0.0173729
111.59	0.00307712	111.59	0.0161595
111.79	-0.00046659	111.79	0.0172329
111.99	0.00431566	111.99	0.016235
112.19	0.00176349	112.19	0.0161065
112.39	0.00369696	112.39	0.017854
112.59	0.00376501	112.59	0.0165416
112.79	0.00323576	112.79	0.0174636
112.99	0.00293871	112.99	0.0162135
113.19	0.00407783	113.19	0.0155418
113.39	0.00095501	113.39	0.0170203
113.59	0.00801285	113.59	0.0192726
113.79	0.00312562	113.79	0.0177823
113.99	0.00499706	113.99	0.0185417
114.19	0.00607517	114.19	0.0182512
114.39	0.00179892	114.39	0.0162524
114.59	0.00493032	114.59	0.0208633
114.79	0.00017278	114.79	0.0162327
114.99	0.00613413	114.99	0.0171736
115.19	0.00485156	115.19	0.016572
115.39	0.00389493	115.39	0.0192421
115.59	0.00098891	115.59	0.0141403
115.79	0.00411217	115.79	0.0206143
115.99	0.00696342	115.99	0.017916
116.19	0.0025863	116.19	0.0195398
116.39	0.00371608	116.39	0.0156916
116.59	0.00147177	116.59	0.0156421
116.79	0.00477715	116.79	0.0187124
116.99	0.00338014	116.99	0.0167788
117.19	0.00264416	117.19	0.0153323
117.39	0.00480536	117.39	0.0191771
117.59	0.00188174	117.59	0.013944
117.79	0.00509124	117.79	0.0207094
117.99	-0.00105523	117.99	0.0164194
118.19	0.00313613	118.19	0.0177292
118.39	0.00357798	118.39	0.0154371
118.59	0.00501217	118.59	0.0176026
118.79	0.00652442	118.79	0.0170135
118.99	0.00288896	118.99	0.0211527
119.19	0.00387378	119.19	0.0159223
119.39	0.00340434	119.39	0.0200385
119.59	0.00559326	119.59	0.0169629
119.79	0.00567274	119.79	0.0194471
119.99	0.00548312	119.99	0.0185355
120.19	0.00446983	120.19	0.0164295
120.39	0.00452826	120.39	0.0212231
120.59	0.00587993	120.59	0.0146569
120.79	0.00198217	120.79	0.0177288
120.99	0.00158244	120.99	0.0197083
121.19	0.00270514	121.19	0.0147702
121.39	0.00531381	121.39	0.0197906
121.59	-0.00022296	121.59	0.0180631
121.79	0.00596162	121.79	0.0234684
121.99	0.00218997	121.99	0.0192053
122.19	0.00577648	122.19	0.0182097
122.39	0.00291594	122.39	0.020062
122.59	0.00544326	122.59	0.0171187
122.79	0.00415587	122.79	0.0223027
122.99	0.00181836	122.99	0.016953
123.19	0.00026264	123.19	0.0201398
123.39	0.00400318	123.39	0.0178398
123.59	0.00353291	123.59	0.0136058
123.79	-0.00055192	123.79	0.0181265
123.99	0.0019867	123.99	0.0140239
124.19	0.00109881	124.19	0.018473
124.39	0.00131242	124.39	0.0164434
124.59	0.00094162	124.59	0.0212595
124.79	0.00262613	124.79	0.0191184
124.99	0.00397651	124.99	0.0155333
125.19	0.00390498	125.19	0.0165301
125.39	0.00412366	125.39	0.0178033
125.59	0.00400349	125.59	0.0158065
125.79	0.00429396	125.79	0.0176161
125.99	0.00363993	125.99	0.0134556
126.19	0.0032309	126.19	0.0175528
126.39	0.00187793	126.39	0.0172168
126.59	0.00150617	126.59	0.0176262
126.79	0.00330083	126.79	0.0170658
126.99	0.00472136	126.99	0.0157299
127.19	0.00288123	127.19	0.0169553
127.39	0.00239209	127.39	0.0151157
127.59	0.00271683	127.59	0.0166142
127.79	0.00040443	127.79	0.0193192
127.99	0.00213951	127.99	0.0144141
128.19	0.00133873	128.19	0.0170116
128.39	0.00289068	128.39	0.0150952
128.59	-0.00046857	128.59	0.0132014
128.79	0.00058009	128.79	0.0197068
128.99	0.00228321	128.99	0.0150764
129.19	0.00362111	129.19	0.0168056
129.39	0.00462412	129.39	0.017792
129.59	0.00222396	129.59	0.0204803
129.79	0.00310725	129.79	0.0173454
129.99	0.00334198	129.99	0.0182634
130.19	-0.00041811	130.19	0.0201485
130.39	0.00202866	130.39	0.0174217
130.59	0.0026634	130.59	0.0168308
130.79	0.0014882	130.79	0.0195213
130.99	0.00228955	130.99	0.0175516
131.19	0.00270863	131.19	0.0198194
131.39	0.00445582	131.39	0.0170956
131.59	0.00379158	131.59	0.0208815
131.79	0.00406338	131.79	0.0177748
131.99	-0.00015701	131.99	0.017628
132.19	0.00400557	132.19	0.0210213
132.39	0.00100901	132.39	0.0147934
132.59	0.00153239	132.59	0.0155788
132.79	0.00167088	132.79	0.0179359
132.99	0.00070426	132.99	0.0165603
133.19	0.00281616	133.19	0.0192591
133.39	0.00205384	133.39	0.018186
133.59	0.00053553	133.59	0.0173973
133.79	0.00116857	133.79	0.016728
133.99	0.00066612	133.99	0.0210422
134.19	0.00361027	134.19	0.0144098
134.39	0.00159208	134.39	0.0161089
134.59	0.0040032	134.59	0.0197876
134.79	0.00493679	134.79	0.0136721
134.99	0.0024361	134.99	0.0199525
135.19	0.00332861	135.19	0.0167901
135.39	0.0009412	135.39	0.0181751
135.59	0.00077942	135.59	0.02207
135.79	0.00177598	135.79	0.0174793
135.99	0.00272449	135.99	0.0228043
136.19	0.00347717	136.19	0.0139215
136.39	0.00358904	136.39	0.0195295
136.59	0.0015909	136.59	0.0188779
136.79	0.00093886	136.79	0.0163907
136.99	0.00208637	136.99	0.020027
137.19	0.00095974	137.19	0.0157077
137.39	0.00541758	137.39	0.0163689
137.59	0.00551918	137.59	0.0171329
137.79	0.00194918	137.79	0.0193651
137.99	0.00700276	137.99	0.0199856
138.19	0.00208972	138.19	0.0175215
138.39	0.00304301	138.39	0.0183321
138.59	0.00215744	138.59	0.0174059
138.79	0.0043148	138.79	0.0171926
138.99	0.00367709	138.99	0.0193204
139.19	0.00137434	139.19	0.019708
139.39	0.00223394	139.39	0.0193331
139.59	0.00474868	139.59	0.0180546
139.79	0.00272599	139.79	0.0183545
139.99	0.00497425	139.99	0.0154078
140.19	0.00329121	140.19	0.0157423
140.39	0.00047469	140.39	0.0175865
140.59	0.00218154	140.59	0.0174163
140.79	0.00232973	140.79	0.0188925
140.99	0.00311228	140.99	0.0148043
141.19	0.00449951	141.19	0.0197196
141.39	0.00016214	141.39	0.0186134
141.59	0.00274492	141.59	0.0170863
141.79	0.00425439	141.79	0.0157837
141.99	0.00048251	141.99	0.0185584
142.19	0.00118143	142.19	0.0212171
142.39	0.00415406	142.39	0.0158001
142.59	-0.00016227	142.59	0.0173764
142.79	0.00099564	142.79	0.0135935
142.99	0.00298474	142.99	0.0175201
143.19	0.00188848	143.19	0.0147819
143.39	0.00022095	143.39	0.0190453
143.59	0.0026658	143.59	0.0188149
143.79	0.0034483	143.79	0.0193571
143.99	-0.00068497	143.99	0.0147669
144.19	0.00158879	144.19	0.0169182
144.39	0.00100918	144.39	0.0184742
144.59	0.00415825	144.59	0.0196545
144.79	0.00280937	144.79	0.0164791
144.99	-0.00042397	144.99	0.0204745
145.19	-0.00116997	145.19	0.0156752
145.39	0.00190214	145.39	0.0145316
145.59	0.00425208	145.59	0.0201193
145.79	0.00206363	145.79	0.0154096
145.99	0.00091999	145.99	0.0164414
146.19	0.00425361	146.19	0.0208973
146.39	0.00288248	146.39	0.019753
146.59	0.0060006	146.59	0.018865
146.79	-0.00019637	146.79	0.0147534
146.99	8.741e-05	146.99	0.0182483
147.19	-0.00010668	147.19	0.0180447
147.39	0.00251199	147.39	0.0172241
147.59	-0.00275221	147.59	0.0145682
147.79	0.0040081	147.79	0.0197777
147.99	0.00060568	147.99	0.0193251
148.19	0.0032915	148.19	0.0194379
148.39	0.00288781	148.39	0.020115
148.59	0.00311639	148.59	0.0201213
148.79	0.00429745	148.79	0.015901
148.99	0.00217157	148.99	0.0143296
149.19	-0.00025686	149.19	0.0210556
149.39	0.00102518	149.39	0.0161365
149.59	0.00329191	149.59	0.0155254
149.79	0.00433797	149.79	0.0154329
149.99	0.00227929	149.99	0.0192467
150.19	0.00513636	150.19	0.0174085
150.39	0.00138113	150.39	0.0188186
150.59	0.00128965	150.59	0.01588
150.79	0.00399988	150.79	0.0170804
150.99	0.00074074	150.99	0.0154297
151.19	0.00229861	151.19	0.0193739
151.39	0.00113586	151.39	0.0182493
151.59	0.00284541	151.59	0.0157455
151.79	0.00329202	151.79	0.0183754
151.99	0.00189491	151.99	0.0185321
152.19	-7.53e-06	152.19	0.0214609
152.39	0.00090653	152.39	0.0157245
152.59	0.00201752	152.59	0.0155319
152.79	0.00023931	152.79	0.0196639
152.99	0.00045291	152.99	0.0163266
153.19	0.0002817	153.19	0.0175977
153.39	0.00394954	153.39	0.0167972
153.59	0.00192932	153.59	0.0151893
153.79	0.00240403	153.79	0.0182768
153.99	0.0031718	153.99	0.0176571
154.19	0.00038098	154.19	0.0145677
154.39	0.00364182	154.39	0.0174936
154.59	0.00118993	154.59	0.0139659
154.79	0.00493627	154.79	0.0206707
154.99	0.0020111	154.99	0.0201684
155.19	0.00224415	155.19	0.0150935
155.39	0.00359914	155.39	0.0140075
155.59	0.00201284	155.59	0.0150474
155.79	0.00160142	155.79	0.020721
155.99	0.00234685	155.99	0.016767
156.19	-4.199e-05	156.19	0.0177704
156.39	0.00544982	156.39	0.0181375
156.59	0.00307027	156.59	0.0185342
156.79	0.00527756	156.79	0.0179469
156.99	0.00129458	156.99	0.0186466
157.19	0.0040171	157.19	0.0182014
157.39	0.00411585	157.39	0.0193104
157.59	0.00250526	157.59	0.0168802
157.79	0.00416269	157.79	0.0183729
157.99	0.00141712	157.99	0.018298
158.19	-0.00010015	158.19	0.0152522
158.39	0.00376778	158.39	0.0198656
158.59	0.00033251	158.59	0.0138502
158.79	0.00124225	158.79	0.0156102
158.99	0.00176028	158.99	0.0177057
159.19	0.00457258	159.19	0.0144769
159.39	0.00452588	159.39	0.0146613
159.59	0.00122963	159.59	0.0177799
159.79	-0.00018095	159.79	0.0187644
159.99	0.00369303	159.99	0.0198351
160.19	-0.00079606	160.19	0.0169491
160.39	0.00144041	160.39	0.0121155
160.59	0.00085765	160.59	0.015442
160.79	-0.00041692	160.79	0.0171469
160.99	-0.00027371	160.99	0.0158233
161.19	0.00436584	161.19	0.0158584
161.39	0.00119931	161.39	0.0157914
161.59	0.00079522	161.59	0.0145078
161.79	0.00262899	161.79	0.0162556
161.99	0.00193981	161.99	0.0149985
162.19	0.00145924	162.19	0.0168315
162.39	0.00432249	162.39	0.0165628
162.59	0.00303941	162.59	0.0160377
162.79	-2.625e-05	162.79	0.018497
162.99	0.00164863	162.99	0.0180643
163.19	-0.00021655	163.19	0.0184058
163.39	-5.935e-05	163.39	0.0158632
163.59	-0.00016097	163.59	0.0185641
163.79	-0.00130702	163.79	0.0182483
163.99	0.00552487	163.99	0.0194466
164.19	0.00053944	164.19	0.0159962
164.39	0.0040892	164.39	0.0142223
164.59	0.00224418	164.59	0.0182778
164.79	0.00427291	164.79	0.0160541
164.99	0.00028396	164.99	0.0209768
165.19	-0.00022313	165.19	0.0191998
165.39	0.00195735	165.39	0.0173539
165.59	-0.00174736	165.59	0.0161852
165.79	0.00178552	165.79	0.0186526
165.99	0.00022947	165.99	0.0134166
166.19	0.00059231	166.19	0.0200484
166.39	0.00044533	166.39	0.0166368
166.59	0.00172514	166.59	0.0148164
166.79	0.00040385	166.79	0.0143219
166.99	-0.0014839	166.99	0.0148957
167.19	0.00225757	167.19	0.0125679
167.39	0.00094696	167.39	0.0165955
167.59	-0.00021426	167.59	0.0161228
167.79	0.00278302	167.79	0.0160507
167.99	-0.00038013	167.99	0.0159774
168.19	0.00168135	168.19	0.0136689
168.39	0.00050549	168.39	0.0167337
168.59	0.00347325	168.59	0.0162778
168.79	0.00136404	168.79	0.0156039
168.99	-0.00365217	168.99	0.0175693
169.19	-2.357e-05	169.19	0.0159822
169.39	0.00208741	169.39	0.0175563
169.59	0.0006183	169.59	0.0184169
169.79	0.00257246	169.79	0.01335
169.99	0.00183113	169.99	0.0180458
170.19	0.00172732	170.19	0.0149771
170.39	0.00279906	170.39	0.0127501
170.59	0.00354941	170.59	0.0152237
170.79	0.00118758	170.79	0.0187068
170.99	-0.00068151	170.99	0.0162413
171.19	0.00296822	171.19	0.0141711
171.39	-0.00295265	171.39	0.0154975
171.59	0.00029534	171.59	0.0153957
171.79	-0.0005071	171.79	0.0157269
171.99	-0.00036072	171.99	0.0179455
172.19	0.00472999	172.19	0.0204328
172.39	0.00365881	172.39	0.0198884
172.59	-0.0004951	172.59	0.0178433
172.79	0.00033496	172.79	0.0154598
172.99	0.00067819	172.99	0.0145073
173.19	0.00357012	173.19	0.0166841
173.39	-0.00011476	173.39	0.0172387
173.59	0.00157877	173.59	0.0153103
173.79	0.00195226	173.79	0.0133055
173.99	0.00247636	173.99	0.0174291
174.19	-0.0020348	174.19	0.0153796
174.39	0.00083891	174.39	0.0173002
174.59	0.00102446	174.59	0.0175798
174.79	0.00101025	174.79	0.0154697
174.99	0.00163596	174.99	0.0171826
175.19	0.00011247	175.19	0.0174843
175.39	0.00312327	175.39	0.0139882
175.59	0.00288348	175.59	0.0181663
175.79	0.00377955	175.79	0.0183079
175.99	0.00394765	175.99	0.0214221
176.19	0.00022028	176.19	0.0128781
176.39	0.00137291	176.39	0.0175756
176.59	-0.00018301	176.59	0.0146671
176.79	0.0050555	176.79	0.0228469
176.99	0.00080759	176.99	0.0154063
177.19	0.00208726	177.19	0.0155859
177.39	0.00313206	177.39	0.020438
177.59	0.00014482	177.59	0.0130556
177.79	0.00020317	177.79	0.0159121
177.99	0.00137057	177.99	0.0180155
178.19	-0.00070926	178.19	0.0171712
178.39	-0.00044397	178.39	0.0112456
178.59	0.00396172	178.59	0.0175758
178.79	-0.00048259	178.79	0.0173304
178.99	-9.645e-05	178.99	0.0136479
179.19	0.00197579	179.19	0.0176563
179.39	-0.00176856	179.39	0.0165462
179.59	0.00102644	179.59	0.0146538
179.79	-0.00027443	179.79	0.0201512
179.99	0.00035957	179.99	0.0181075
180.19	-0.00072812	180.19	0.0150489
180.39	0.00263382	180.39	0.0178168
180.59	0.00050721	180.59	0.0177608
180.79	-0.00018552	180.79	0.0156568
180.99	0.00062883	180.99	0.0148388
181.19	0.00065927	181.19	0.0184013
181.39	0.00404575	181.39	0.0177129
181.59	-0.00015975	181.59	0.0161723
181.79	0.00042111	181.79	0.02088
181.99	0.00404912	181.99	0.0183967
182.19	0.00242493	182.19	0.0203626
182.39	0.00197636	182.39	0.019603
182.59	0.00321026	182.59	0.0165868
182.79	-0.00117514	182.79	0.0146019
182.99	-5.026e-05	182.99	0.0142508
183.19	0.00141517	183.19	0.0178375
183.39	-0.00103296	183.39	0.0207114
183.59	-0.00048087	183.59	0.0171845
183.79	0.00229276	183.79	0.0198297
183.99	-0.00089293	183.99	0.0196736
184.19	0.00583656	184.19	0.0179261
184.39	0.00443417	184.39	0.0213673
184.59	-0.00158542	184.59	0.0169186
184.79	-0.000502	184.79	0.0162944
184.99	-0.00058134	184.99	0.0166584
185.19	0.00224339	185.19	0.0156469
185.39	0.00434478	185.39	0.0148565
185.59	-0.00090139	185.59	0.014949
185.79	0.00171063	185.79	0.0173688
185.99	0.00019925	185.99	0.0195184
186.19	0.00024106	186.19	0.015604
186.39	0.00097061	186.39	0.0164353
186.59	-0.00194139	186.59	0.0162332
186.79	0.000171	186.79	0.0178151
186.99	0.00163674	186.99	0.0183001
187.19	0.00153987	187.19	0.0159416
187.39	-0.00198664	187.39	0.0186453
187.59	0.0021459	187.59	0.0170874
187.79	0.00134231	187.79	0.0168451
187.99	0.00144873	187.99	0.0169864
188.19	0.00372286	188.19	0.0153086
188.39	0.00241306	188.39	0.0153192
188.59	0.00307351	188.59	0.0186761
188.79	0.00364989	188.79	0.015651
188.99	1.165e-05	188.99	0.0150447
189.19	-6.926e-05	189.19	0.0179304
189.39	0.00144141	189.39	0.0160534
189.59	0.00170149	189.59	0.0161861
189.79	0.00231444	189.79	0.0181053
189.99	-0.00177528	189.99	0.0172211
190.19	-0.0003172	190.19	0.0172371
190.39	0.00096844	190.39	0.0168089
190.59	0.00025754	190.59	0.0203351
190.79	0.00060655	190.79	0.0179412
190.99	0.0016574	190.99	0.0171253
191.19	0.00207671	191.19	0.0128831
191.39	0.00234598	191.39	0.0159236
191.59	-0.00225792	191.59	0.0178943
191.79	-0.00167872	191.79	0.0159909
191.99	0.00069464	191.99	0.0125662
192.19	-0.00272461	192.19	0.0200867
192.39	-0.00113589	192.39	0.0139012
192.59	0.0039861	192.59	0.0184365
192.79	0.00171051	192.79	0.0144616
192.99	-0.00274439	192.99	0.0155629
193.19	0.00321236	193.19	0.0154813
193.39	-0.00287114	193.39	0.0186389
193.59	0.00238203	193.59	0.0179434
193.79	0.0017873	193.79	0.0178615
193.99	0.00173418	193.99	0.0170018
194.19	-0.00071952	194.19	0.0123342
194.39	0.0002168	194.39	0.016349
194.59	0.00054679	194.59	0.0148211
194.79	0.00295634	194.79	0.0154691
194.99	0.00378883	194.99	0.0180355
195.19	0.00236761	195.19	0.0171483
195.39	5.878e-05	195.39	0.0186446
195.59	-0.00111339	195.59	0.0162303
195.79	0.00260905	195.79	0.0157992
195.99	0.00012066	195.99	0.0183085
196.19	-0.00101107	196.19	0.0156346
196.39	0.00118738	196.39	0.0124243
196.59	0.00256756	196.59	0.0169059
196.79	0.00015006	196.79	0.0172558
196.99	5.794e-05	196.99	0.0189696
197.19	0.00118107	197.19	0.0176865
197.39	-0.00034082	197.39	0.0152531
197.59	0.0012174	197.59	0.0167917
197.79	0.0032129	197.79	0.0170911
197.99	0.00035706	197.99	0.0162639
198.19	-0.00071433	198.19	0.0157361
198.39	0.00133697	198.39	0.0139827
198.59	0.0003312	198.59	0.0185846
198.79	0.00022378	198.79	0.0138778
198.99	-0.00084016	198.99	0.0135979
199.19	0.00043882	199.19	0.0134542	load proteins on tip
199.39	-0.00247765	199.39	0.0148478
199.59	0.0008186	199.59	0.0186897
199.79	0.00172027	199.79	0.0175194
200	0.00703009	200	0.0277225
200.19	0.0200688	200.19	0.0378305
200.39	0.030412	200.39	0.050034
200.59	0.0461018	200.59	0.0624739
200.79	0.0620544	200.79	0.0722322
200.99	0.0730148	200.99	0.0823483
201.19	0.0811141	201.19	0.0921082
201.39	0.0928505	201.39	0.104587
201.59	0.100352	201.59	0.101718
201.79	0.10695	201.79	0.110926
201.99	0.111722	201.99	0.114994
202.19	0.117323	202.19	0.12132
202.39	0.120578	202.39	0.12166
202.59	0.124375	202.59	0.125192
202.79	0.126462	202.79	0.125747
202.99	0.130356	202.99	0.133406
203.19	0.133741	203.19	0.134876
203.39	0.13377	203.39	0.140874
203.59	0.138612	203.59	0.136994
203.79	0.141819	203.79	0.13939
203.99	0.142303	203.99	0.137556
204.19	0.143066	204.19	0.140228
204.39	0.142809	204.39	0.142911
204.59	0.145982	204.59	0.142729
204.79	0.144039	204.79	0.145388
204.99	0.14716	204.99	0.149425
205.19	0.14925	205.19	0.143342
205.39	0.149778	205.39	0.146993
205.59	0.151755	205.59	0.153796
205.79	0.15295	205.79	0.151245
205.99	0.155468	205.99	0.152304
206.19	0.153093	206.19	0.150882
206.39	0.154262	206.39	0.153371
206.59	0.157586	206.59	0.152678
206.79	0.157895	206.79	0.151422
206.99	0.159764	206.99	0.150624
207.19	0.158918	207.19	0.153759
207.39	0.16027	207.39	0.157
207.59	0.159306	207.59	0.160193
207.79	0.161572	207.79	0.157046
207.99	0.160307	207.99	0.155843
208.19	0.163727	208.19	0.154787
208.39	0.166308	208.39	0.157682
208.59	0.165142	208.59	0.16052
208.79	0.167669	208.79	0.160358
208.99	0.165881	208.99	0.162354
209.19	0.165021	209.19	0.16059
209.39	0.171517	209.39	0.164501
209.59	0.169847	209.59	0.165231
209.79	0.173851	209.79	0.164477
209.99	0.173723	209.99	0.160129
210.19	0.172383	210.19	0.16416
210.39	0.170483	210.39	0.170024
210.59	0.175513	210.59	0.167849
210.79	0.174281	210.79	0.170049
210.99	0.173116	210.99	0.168519
211.19	0.178682	211.19	0.166266
211.39	0.177607	211.39	0.168649
211.59	0.178049	211.59	0.171343
211.79	0.178563	211.79	0.171545
211.99	0.17925	211.99	0.169601
212.19	0.179778	212.19	0.171643
212.39	0.179174	212.39	0.172129
212.59	0.184121	212.59	0.171474
212.79	0.184135	212.79	0.173263
212.99	0.18451	212.99	0.176872
213.19	0.182684	213.19	0.177463
213.39	0.183821	213.39	0.179865
213.59	0.185299	213.59	0.179158
213.79	0.185809	213.79	0.176918
213.99	0.189937	213.99	0.177883
214.19	0.188108	214.19	0.181239
214.39	0.191851	214.39	0.177899
214.59	0.189999	214.59	0.176547
214.79	0.190381	214.79	0.179334
214.99	0.191799	214.99	0.182963
215.19	0.192653	215.19	0.185316
215.39	0.192504	215.39	0.182621
215.59	0.196512	215.59	0.183504
215.79	0.19804	215.79	0.18444
215.99	0.195757	215.99	0.184709
216.19	0.197775	216.19	0.187712
216.39	0.196294	216.39	0.188584
216.59	0.200189	216.59	0.186422
216.79	0.20346	216.79	0.190491
216.99	0.201464	216.99	0.191191
217.19	0.202242	217.19	0.189676
217.39	0.20331	217.39	0.188316
217.59	0.205382	217.59	0.192073
217.79	0.206107	217.79	0.188193
217.99	0.203743	217.99	0.19456
218.19	0.209266	218.19	0.194183
218.39	0.209465	218.39	0.19408
218.59	0.209324	218.59	0.196881
218.79	0.206154	218.79	0.197403
218.99	0.209553	218.99	0.198951
219.19	0.211825	219.19	0.199031
219.39	0.214758	219.39	0.197637
219.59	0.211122	219.59	0.198284
219.79	0.21296	219.79	0.201207
219.99	0.21294	219.99	0.199231
220.19	0.212303	220.19	0.198991
220.39	0.213618	220.39	0.198069
220.59	0.215725	220.59	0.205787
220.79	0.218015	220.79	0.206108
220.99	0.218227	220.99	0.201819
221.19	0.218679	221.19	0.204246
221.39	0.219762	221.39	0.207207
221.59	0.218192	221.59	0.208293
221.79	0.220144	221.79	0.204546
221.99	0.223264	221.99	0.210881
222.19	0.226343	222.19	0.210438
222.39	0.224508	222.39	0.206112
222.59	0.228207	222.59	0.211104
222.79	0.224655	222.79	0.211773
222.99	0.227876	222.99	0.211511
223.19	0.226284	223.19	0.214617
223.39	0.228061	223.39	0.211989
223.59	0.22891	223.59	0.211639
223.79	0.229491	223.79	0.213229
223.99	0.233576	223.99	0.216182
224.19	0.233086	224.19	0.217459
224.39	0.233752	224.39	0.219576
224.59	0.235172	224.59	0.218457
224.79	0.237306	224.79	0.217944
224.99	0.236046	224.99	0.218793
225.19	0.235423	225.19	0.218117
225.39	0.235749	225.39	0.219102
225.59	0.239083	225.59	0.219504
225.79	0.240664	225.79	0.222674
225.99	0.236069	225.99	0.222597
226.19	0.238985	226.19	0.223237
226.39	0.243108	226.39	0.223252
226.59	0.239118	226.59	0.225119
226.79	0.246343	226.79	0.225574
226.99	0.242573	226.99	0.227553
227.19	0.245073	227.19	0.226133
227.39	0.246082	227.39	0.225415
227.59	0.24714	227.59	0.225182
227.79	0.248877	227.79	0.229676
227.99	0.24987	227.99	0.22911
228.19	0.249354	228.19	0.230985
228.39	0.250223	228.39	0.230781
228.59	0.252224	228.59	0.234659
228.79	0.255319	228.79	0.232292
228.99	0.252279	228.99	0.231393
229.19	0.255078	229.19	0.239741
229.39	0.255391	229.39	0.235851
229.59	0.254412	229.59	0.238399
229.79	0.258869	229.79	0.238774
229.99	0.25289	229.99	0.237509
230.19	0.259491	230.19	0.239309
230.39	0.257416	230.39	0.23706
230.59	0.2602	230.59	0.236058
230.79	0.26235	230.79	0.240168
230.99	0.262819	230.99	0.238837
231.19	0.262258	231.19	0.242441
231.39	0.266634	231.39	0.246927
231.59	0.262701	231.59	0.241851
231.79	0.264752	231.79	0.248283
231.99	0.265627	231.99	0.243472
232.19	0.267802	232.19	0.250286
232.39	0.268913	232.39	0.247595
232.59	0.268878	232.59	0.245819
232.79	0.271494	232.79	0.248585
232.99	0.273515	232.99	0.252155
233.19	0.271939	233.19	0.251366
233.39	0.275853	233.39	0.249423
233.59	0.272353	233.59	0.251917
233.79	0.272982	233.79	0.24925
233.99	0.274759	233.99	0.254568
234.19	0.273855	234.19	0.255731
234.39	0.28008	234.39	0.255645
234.59	0.280065	234.59	0.256543
234.79	0.279282	234.79	0.259706
234.99	0.280422	234.99	0.254081
235.19	0.284196	235.19	0.257683
235.39	0.281862	235.39	0.260472
235.59	0.28318	235.59	0.258796
235.79	0.283063	235.79	0.263209
235.99	0.282527	235.99	0.259059
236.19	0.284698	236.19	0.262138
236.39	0.285114	236.39	0.260795
236.59	0.288725	236.59	0.262483
236.79	0.290219	236.79	0.261669
236.99	0.29063	236.99	0.263115
237.19	0.289808	237.19	0.267017
237.39	0.291389	237.39	0.262185
237.59	0.290421	237.59	0.266937
237.79	0.294519	237.79	0.267669
237.99	0.298401	237.99	0.269653
238.19	0.295432	238.19	0.266151
238.39	0.297183	238.39	0.267702
238.59	0.29996	238.59	0.268883
238.79	0.297498	238.79	0.273166
238.99	0.299925	238.99	0.273864
239.19	0.300319	239.19	0.274086
239.39	0.298328	239.39	0.272799
239.59	0.301	239.59	0.273023
239.79	0.302903	239.79	0.276577
239.99	0.302525	239.99	0.278793
240.19	0.305192	240.19	0.276561
240.39	0.305728	240.39	0.277348
240.59	0.303831	240.59	0.277078
240.79	0.306243	240.79	0.281217
240.99	0.307896	240.99	0.283137
241.19	0.306703	241.19	0.280142
241.39	0.310645	241.39	0.280411
241.59	0.308542	241.59	0.285796
241.79	0.310946	241.79	0.284959
241.99	0.312209	241.99	0.284536
242.19	0.316347	242.19	0.282459
242.39	0.315475	242.39	0.286879
242.59	0.314102	242.59	0.283503
242.79	0.31307	242.79	0.288156
242.99	0.317628	242.99	0.291486
243.19	0.320796	243.19	0.289822
243.39	0.319608	243.39	0.287703
243.59	0.317654	243.59	0.28952
243.79	0.317366	243.79	0.291103
243.99	0.319116	243.99	0.291223
244.19	0.319629	244.19	0.28784
244.39	0.320083	244.39	0.293298
244.59	0.328457	244.59	0.297587
244.79	0.324262	244.79	0.294963
244.99	0.327906	244.99	0.294376
245.19	0.327735	245.19	0.301027
245.39	0.328974	245.39	0.298703
245.59	0.327108	245.59	0.299481
245.79	0.329248	245.79	0.30324
245.99	0.328362	245.99	0.298568
246.19	0.330677	246.19	0.30232
246.39	0.332927	246.39	0.301409
246.59	0.333182	246.59	0.302522
246.79	0.335224	246.79	0.301194
246.99	0.336462	246.99	0.30621
247.19	0.338417	247.19	0.303408
247.39	0.339216	247.39	0.302198
247.59	0.335838	247.59	0.30849
247.79	0.340088	247.79	0.306171
247.99	0.342435	247.99	0.307441
248.19	0.34434	248.19	0.312479
248.39	0.341135	248.39	0.31302
248.59	0.345125	248.59	0.307805
248.79	0.343162	248.79	0.311066
248.99	0.344201	248.99	0.310489
249.19	0.345655	249.19	0.313668
249.39	0.343628	249.39	0.312193
249.59	0.348958	249.59	0.315953
249.79	0.349779	249.79	0.31432
249.99	0.3486	249.99	0.315638
250.19	0.350448	250.19	0.311363
250.39	0.348129	250.39	0.320233
250.59	0.35169	250.59	0.318544
250.79	0.353654	250.79	0.320102
250.99	0.359578	250.99	0.316087
251.19	0.358092	251.19	0.320195
251.39	0.356495	251.39	0.320864
251.59	0.352145	251.59	0.324609
251.79	0.358653	251.79	0.324516
251.99	0.358242	251.99	0.321776
252.19	0.359277	252.19	0.323704
252.39	0.361126	252.39	0.326286
252.59	0.358811	252.59	0.328388
252.79	0.361955	252.79	0.325249
252.99	0.364429	252.99	0.327231
253.19	0.3663	253.19	0.324799
253.39	0.364988	253.39	0.329381
253.59	0.365513	253.59	0.3297
253.79	0.36823	253.79	0.330378
253.99	0.367713	253.99	0.329476
254.19	0.367654	254.19	0.328274
254.39	0.369702	254.39	0.333852
254.59	0.370688	254.59	0.338916
254.79	0.371495	254.79	0.338481
254.99	0.373145	254.99	0.337375
255.19	0.374618	255.19	0.335579
255.39	0.374395	255.39	0.341247
255.59	0.375762	255.59	0.341763
255.79	0.376881	255.79	0.338166
255.99	0.378599	255.99	0.340497
256.19	0.375527	256.19	0.341227
256.39	0.380491	256.39	0.344485
256.59	0.379466	256.59	0.342775
256.79	0.37947	256.79	0.343069
256.99	0.38101	256.99	0.34402
257.19	0.386173	257.19	0.343944
257.39	0.381824	257.39	0.347359
257.59	0.386237	257.59	0.342395
257.79	0.385624	257.79	0.347423
257.99	0.391362	257.99	0.342671
258.19	0.387486	258.19	0.350038
258.39	0.387575	258.39	0.350041
258.59	0.388716	258.59	0.34908
258.79	0.390741	258.79	0.351966
258.99	0.391249	258.99	0.34956
259.19	0.393331	259.19	0.354553
259.39	0.393752	259.39	0.354084
259.59	0.393521	259.59	0.353504
259.79	0.393133	259.79	0.353476
259.99	0.394594	259.99	0.357143
260.19	0.397291	260.19	0.358033
260.39	0.400046	260.39	0.358579
260.59	0.398699	260.59	0.357835
260.79	0.402771	260.79	0.359295
260.99	0.400297	260.99	0.362889
261.19	0.402876	261.19	0.360032
261.39	0.403734	261.39	0.361634
261.59	0.406533	261.59	0.359553
261.79	0.402663	261.79	0.366737
261.99	0.404683	261.99	0.369617
262.19	0.404202	262.19	0.366419
262.39	0.409663	262.39	0.363451
262.59	0.411937	262.59	0.365691
262.79	0.409037	262.79	0.368204
262.99	0.41122	262.99	0.369285
263.19	0.408923	263.19	0.369756
263.39	0.413867	263.39	0.374077
263.59	0.411519	263.59	0.370871
263.79	0.4125	263.79	0.371276
263.99	0.417139	263.99	0.371506
264.19	0.416364	264.19	0.369479
264.39	0.417969	264.39	0.376791
264.59	0.420332	264.59	0.378276
264.79	0.418987	264.79	0.372797
264.99	0.420106	264.99	0.377923
265.19	0.423284	265.19	0.379159
265.39	0.425288	265.39	0.382401
265.59	0.422003	265.59	0.379363
265.79	0.424943	265.79	0.381898
265.99	0.426321	265.99	0.381784
266.19	0.428538	266.19	0.379823
266.39	0.428481	266.39	0.383961
266.59	0.431267	266.59	0.385441
266.79	0.428273	266.79	0.384866
266.99	0.427867	266.99	0.383151
267.19	0.431509	267.19	0.384144
267.39	0.43281	267.39	0.391006
267.59	0.431656	267.59	0.386254
267.79	0.433591	267.79	0.384677
267.99	0.436749	267.99	0.387666
268.19	0.436774	268.19	0.38573
268.39	0.435864	268.39	0.392039
268.59	0.439574	268.59	0.391751
268.79	0.438863	268.79	0.390943
268.99	0.435999	268.99	0.395258
269.19	0.441653	269.19	0.394742
269.39	0.443805	269.39	0.395962
269.59	0.440496	269.59	0.398438
269.79	0.445736	269.79	0.40349
269.99	0.444121	269.99	0.396572
270.19	0.448349	270.19	0.398806
270.39	0.440994	270.39	0.399285
270.59	0.448287	270.59	0.398055
270.79	0.451481	270.79	0.398466
270.99	0.449707	270.99	0.40307
271.19	0.45322	271.19	0.403705
271.39	0.451155	271.39	0.400817
271.59	0.449329	271.59	0.401527
271.79	0.453049	271.79	0.406739
271.99	0.453104	271.99	0.408584
272.19	0.456713	272.19	0.405806
272.39	0.458322	272.39	0.411051
272.59	0.455507	272.59	0.41254
272.79	0.460554	272.79	0.41107
272.99	0.458154	272.99	0.412824
273.19	0.461977	273.19	0.40961
273.39	0.460805	273.39	0.409327
273.59	0.461157	273.59	0.413924
273.79	0.464873	273.79	0.418129
273.99	0.465435	273.99	0.417174
274.19	0.462101	274.19	0.413521
274.39	0.464314	274.39	0.419862
274.59	0.465491	274.59	0.415123
274.79	0.469615	274.79	0.421321
274.99	0.467878	274.99	0.416961
275.19	0.470672	275.19	0.42066
275.39	0.471954	275.39	0.420847
275.59	0.469013	275.59	0.42323
275.79	0.469056	275.79	0.420865
275.99	0.474888	275.99	0.423054
276.19	0.472504	276.19	0.425011
276.39	0.476527	276.39	0.427282
276.59	0.475934	276.59	0.429277
276.79	0.478735	276.79	0.427352
276.99	0.478506	276.99	0.429122
277.19	0.479118	277.19	0.427611
277.39	0.481019	277.39	0.430441
277.59	0.484692	277.59	0.427132
277.79	0.484928	277.79	0.428171
277.99	0.483678	277.99	0.430952
278.19	0.484966	278.19	0.428766
278.39	0.487829	278.39	0.432564
278.59	0.488466	278.59	0.42999
278.79	0.487734	278.79	0.434381
278.99	0.488579	278.99	0.437356
279.19	0.489857	279.19	0.436166
279.39	0.491022	279.39	0.436726
279.59	0.489554	279.59	0.44098
279.79	0.492356	279.79	0.439635
279.99	0.493279	279.99	0.437318
280.19	0.493674	280.19	0.43947
280.39	0.495489	280.39	0.439533
280.59	0.49744	280.59	0.439083
280.79	0.494746	280.79	0.442706
280.99	0.495907	280.99	0.444434
281.19	0.49968	281.19	0.443172
281.39	0.500244	281.39	0.446633
281.59	0.501138	281.59	0.447107
281.79	0.502146	281.79	0.448391
281.99	0.500788	281.99	0.449476
282.19	0.5053	282.19	0.449647
282.39	0.503197	282.39	0.448865
282.59	0.505101	282.59	0.448176
282.79	0.508889	282.79	0.452244
282.99	0.509783	282.99	0.450918
283.19	0.5069	283.19	0.453778
283.39	0.510238	283.39	0.452271
283.59	0.512795	283.59	0.456076
283.79	0.512325	283.79	0.453603
283.99	0.511816	283.99	0.459783
284.19	0.514598	284.19	0.454133
284.39	0.515837	284.39	0.457008
284.59	0.516039	284.59	0.458217
284.79	0.515831	284.79	0.461103
284.99	0.516305	284.99	0.4635
285.19	0.517532	285.19	0.46545
285.39	0.518397	285.39	0.461931
285.59	0.52378	285.59	0.465685
285.79	0.520639	285.79	0.460933
285.99	0.520654	285.99	0.465164
286.19	0.522379	286.19	0.462265
286.39	0.525652	286.39	0.469579
286.59	0.521889	286.59	0.468715
286.79	0.525992	286.79	0.468387
286.99	0.525872	286.99	0.466933
287.19	0.529862	287.19	0.465091
287.39	0.530512	287.39	0.468311
287.59	0.529202	287.59	0.473061
287.79	0.531785	287.79	0.476954
287.99	0.534352	287.99	0.473445
288.19	0.529663	288.19	0.474355
288.39	0.530812	288.39	0.475061
288.59	0.535305	288.59	0.475097
288.79	0.536637	288.79	0.476108
288.99	0.536495	288.99	0.481163
289.19	0.538208	289.19	0.482169
289.39	0.537543	289.39	0.482761
289.59	0.537808	289.59	0.478966
289.79	0.542538	289.79	0.481919
289.99	0.540155	289.99	0.484127
290.19	0.546951	290.19	0.480605
290.39	0.541265	290.39	0.484604
290.59	0.543353	290.59	0.482539
290.79	0.545448	290.79	0.483427
290.99	0.547946	290.99	0.486609
291.19	0.546142	291.19	0.487504
291.39	0.548382	291.39	0.490482
291.59	0.551637	291.59	0.488777
291.79	0.550558	291.79	0.492779
291.99	0.55181	291.99	0.491948
292.19	0.554691	292.19	0.491974
292.39	0.551827	292.39	0.4922
292.59	0.553811	292.59	0.490129
292.79	0.557741	292.79	0.494358
292.99	0.554839	292.99	0.496638
293.19	0.561403	293.19	0.497475
293.39	0.559699	293.39	0.502054
293.59	0.561107	293.59	0.499318
293.79	0.55929	293.79	0.499242
293.99	0.562054	293.99	0.496698
294.19	0.561395	294.19	0.504743
294.39	0.561363	294.39	0.498949
294.59	0.563626	294.59	0.502474
294.79	0.563536	294.79	0.50282
294.99	0.562308	294.99	0.506345
295.19	0.566576	295.19	0.502375
295.39	0.568388	295.39	0.502993
295.59	0.571852	295.59	0.506095
295.79	0.569702	295.79	0.507358
295.99	0.571744	295.99	0.508082
296.19	0.573473	296.19	0.51041
296.39	0.572335	296.39	0.512215
296.59	0.573628	296.59	0.510828
296.79	0.574949	296.79	0.513437
296.99	0.57555	296.99	0.512151
297.19	0.578199	297.19	0.510873
297.39	0.577697	297.39	0.509974
297.59	0.580142	297.59	0.516954
297.79	0.580562	297.79	0.513969
297.99	0.581679	297.99	0.51853
298.19	0.583258	298.19	0.513513
298.39	0.584381	298.39	0.516654
298.59	0.58292	298.59	0.521794
298.79	0.586162	298.79	0.518418
298.99	0.583329	298.99	0.519799
299.19	0.588602	299.19	0.521554
299.39	0.585091	299.39	0.522773
299.59	0.585679	299.59	0.525169
299.79	0.591315	299.79	0.521967
299.99	0.591914	299.99	0.523958
300.19	0.591634	300.19	0.521757
300.39	0.593609	300.39	0.524023
300.59	0.595569	300.59	0.529911
300.79	0.59394	300.79	0.529432
300.99	0.597318	300.99	0.529734
301.19	0.593822	301.19	0.527101
301.39	0.595553	301.39	0.526561
301.59	0.595249	301.59	0.531909
301.79	0.596624	301.79	0.528853
301.99	0.597511	301.99	0.532803
302.19	0.60101	302.19	0.533543
302.39	0.603078	302.39	0.533804
302.59	0.600572	302.59	0.533163
302.79	0.602969	302.79	0.539743
302.99	0.610522	302.99	0.536117
303.19	0.606259	303.19	0.542416
303.39	0.60451	303.39	0.541172
303.59	0.605839	303.59	0.538441
303.79	0.610769	303.79	0.542339
303.99	0.609544	303.99	0.543025
304.19	0.610697	304.19	0.542633
304.39	0.61095	304.39	0.543031
304.59	0.609686	304.59	0.545271
304.79	0.614156	304.79	0.545174
304.99	0.617092	304.99	0.546128
305.19	0.612221	305.19	0.54721
305.39	0.611264	305.39	0.546592
305.59	0.617364	305.59	0.544581
305.79	0.619722	305.79	0.552524
305.99	0.621447	305.99	0.55303
306.19	0.618155	306.19	0.546977
306.39	0.619558	306.39	0.551121
306.59	0.625501	306.59	0.551866
306.79	0.623264	306.79	0.551617
306.99	0.625504	306.99	0.554727
307.19	0.624323	307.19	0.551494
307.39	0.625404	307.39	0.555694
307.59	0.627089	307.59	0.553833
307.79	0.62883	307.79	0.55746
307.99	0.629192	307.99	0.554538
308.19	0.628032	308.19	0.560318
308.39	0.630037	308.39	0.562072
308.59	0.632544	308.59	0.563467
308.79	0.63306	308.79	0.561238
308.99	0.636227	308.99	0.561206
309.19	0.63485	309.19	0.56257
309.39	0.635292	309.39	0.563963
309.59	0.636633	309.59	0.566483
309.79	0.636261	309.79	0.566745
309.99	0.638308	309.99	0.56478
310.19	0.638816	310.19	0.565914
310.39	0.64109	310.39	0.564802
310.59	0.643411	310.59	0.569025
310.79	0.643301	310.79	0.57045
310.99	0.64462	310.99	0.569877
311.19	0.640681	311.19	0.573073
311.39	0.642776	311.39	0.572799
311.59	0.647696	311.59	0.577958
311.79	0.645909	311.79	0.571053
311.99	0.647294	311.99	0.573047
312.19	0.650617	312.19	0.575667
312.39	0.651173	312.39	0.578004
312.59	0.648544	312.59	0.574615
312.79	0.655125	312.79	0.578966
312.99	0.652227	312.99	0.57674
313.19	0.652715	313.19	0.577093
313.39	0.655525	313.39	0.579603
313.59	0.65809	313.59	0.581961
313.79	0.655128	313.79	0.58206
313.99	0.653884	313.99	0.585567
314.19	0.657654	314.19	0.581094
314.39	0.656819	314.39	0.586083
314.59	0.660674	314.59	0.586024
314.79	0.66241	314.79	0.584416
314.99	0.665135	314.99	0.590109
315.19	0.66575	315.19	0.587112
315.39	0.663712	315.39	0.585056
315.59	0.666235	315.59	0.585199
315.79	0.664824	315.79	0.590824
315.99	0.667242	315.99	0.589631
316.19	0.663887	316.19	0.589876
316.39	0.667459	316.39	0.591965
316.59	0.667431	316.59	0.59427
316.79	0.668862	316.79	0.591701
316.99	0.671231	316.99	0.591426
317.19	0.671344	317.19	0.593254
317.39	0.672435	317.39	0.597602
317.59	0.674086	317.59	0.597264
317.79	0.67745	317.79	0.600223
317.99	0.676793	317.99	0.598891
318.19	0.676934	318.19	0.600327
318.39	0.679256	318.39	0.600373
318.59	0.68212	318.59	0.60031
318.79	0.680103	318.79	0.602212
318.99	0.680129	318.99	0.601588
319.19	0.684536	319.19	0.602227
319.39	0.684131	319.39	0.60939
319.59	0.685784	319.59	0.607067
319.79	0.684001	319.79	0.600809
319.99	0.684475	319.99	0.605867
320.19	0.684619	320.19	0.603708
320.39	0.68878	320.39	0.60997
320.59	0.686877	320.59	0.60921
320.79	0.6922	320.79	0.6146
320.99	0.687081	320.99	0.608497
321.19	0.690457	321.19	0.609561
321.39	0.690139	321.39	0.613787
321.59	0.692159	321.59	0.612371
321.79	0.692326	321.79	0.607701
321.99	0.696971	321.99	0.617576
322.19	0.697354	322.19	0.616644
322.39	0.699847	322.39	0.6172
322.59	0.696796	322.59	0.616063
322.79	0.702284	322.79	0.617873
322.99	0.701871	322.99	0.621961
323.19	0.702261	323.19	0.619087
323.39	0.701394	323.39	0.620614
323.59	0.702397	323.59	0.621087
323.79	0.703149	323.79	0.623242
323.99	0.707588	323.99	0.624716
324.19	0.707046	324.19	0.625038
324.39	0.708792	324.39	0.626961
324.59	0.705622	324.59	0.621914
324.79	0.711857	324.79	0.626352
324.99	0.70878	324.99	0.629201
325.19	0.711701	325.19	0.62949
325.39	0.709988	325.39	0.627204
325.59	0.712515	325.59	0.628449
325.79	0.714368	325.79	0.635024
325.99	0.713686	325.99	0.633093
326.19	0.717202	326.19	0.63345
326.39	0.718363	326.39	0.634736
326.59	0.716402	326.59	0.632118
326.79	0.719919	326.79	0.632859
326.99	0.72188	326.99	0.634983
327.19	0.722681	327.19	0.639703
327.39	0.721381	327.39	0.636791
327.59	0.724818	327.59	0.638424
327.79	0.724768	327.79	0.638205
327.99	0.725318	327.99	0.643095
328.19	0.726775	328.19	0.638252
328.39	0.728749	328.39	0.638267
328.59	0.728725	328.59	0.646028
328.79	0.726995	328.79	0.644745
328.99	0.73089	328.99	0.643922
329.19	0.729694	329.19	0.648004
329.39	0.731962	329.39	0.647245
329.59	0.732856	329.59	0.644732
329.79	0.732968	329.79	0.645927
329.99	0.735385	329.99	0.644789
330.19	0.735463	330.19	0.650656
330.39	0.735067	330.39	0.649252
330.59	0.733774	330.59	0.648901
330.79	0.740741	330.79	0.648954
330.99	0.738621	330.99	0.650153
331.19	0.739647	331.19	0.656338
331.39	0.745026	331.39	0.650168
331.59	0.744368	331.59	0.654182
331.79	0.741253	331.79	0.656199
331.99	0.745228	331.99	0.658266
332.19	0.747345	332.19	0.661504
332.39	0.748304	332.39	0.657515
332.59	0.748292	332.59	0.664762
332.79	0.747737	332.79	0.658923
332.99	0.749845	332.99	0.660302
333.19	0.746941	333.19	0.663535
333.39	0.750899	333.39	0.664945
333.59	0.753666	333.59	0.662933
333.79	0.752978	333.79	0.666213
333.99	0.754698	333.99	0.663264
334.19	0.755479	334.19	0.661726
334.39	0.756926	334.39	0.667615
334.59	0.758099	334.59	0.668066
334.79	0.75769	334.79	0.664301
334.99	0.760759	334.99	0.668341
335.19	0.759302	335.19	0.669364
335.39	0.762508	335.39	0.674828
335.59	0.759185	335.59	0.67331
335.79	0.761118	335.79	0.67387
335.99	0.763967	335.99	0.673271
336.19	0.763976	336.19	0.674503
336.39	0.769166	336.39	0.676248
336.59	0.766317	336.59	0.678277
336.79	0.770316	336.79	0.673814
336.99	0.768834	336.99	0.676418
337.19	0.766318	337.19	0.677893
337.39	0.769194	337.39	0.674982
337.59	0.77088	337.59	0.682207
337.79	0.770147	337.79	0.676288
337.99	0.771588	337.99	0.681486
338.19	0.776479	338.19	0.682041
338.39	0.776618	338.39	0.679982
338.59	0.777479	338.59	0.683761
338.79	0.775019	338.79	0.685091
338.99	0.778723	338.99	0.684251
339.19	0.776472	339.19	0.683829
339.39	0.777163	339.39	0.686269
339.59	0.781341	339.59	0.690165
339.79	0.780067	339.79	0.690214
339.99	0.77919	339.99	0.688695
340.19	0.782508	340.19	0.6914
340.39	0.783867	340.39	0.691246
340.59	0.786096	340.59	0.694921
340.79	0.785413	340.79	0.696849
340.99	0.787592	340.99	0.691567
341.19	0.788873	341.19	0.695393
341.39	0.790392	341.39	0.69586
341.59	0.793218	341.59	0.693806
341.79	0.791355	341.79	0.693686
341.99	0.790804	341.99	0.698134
342.19	0.790043	342.19	0.69609
342.39	0.793958	342.39	0.699902
342.59	0.793518	342.59	0.698701
342.79	0.794885	342.79	0.700938
342.99	0.798734	342.99	0.704804
343.19	0.794161	343.19	0.703094
343.39	0.797431	343.39	0.70017
343.59	0.797267	343.59	0.702298
343.79	0.800417	343.79	0.702487
343.99	0.801518	343.99	0.702667
344.19	0.802613	344.19	0.702683
344.39	0.803091	344.39	0.705747
344.59	0.801926	344.59	0.705941
344.79	0.802851	344.79	0.710628
344.99	0.809059	344.99	0.706825
345.19	0.804983	345.19	0.71187
345.39	0.807641	345.39	0.708954
345.59	0.813378	345.59	0.7118
345.79	0.809608	345.79	0.710822
345.99	0.810254	345.99	0.710196
346.19	0.813119	346.19	0.718132
346.39	0.81061	346.39	0.717118
346.59	0.813788	346.59	0.720973
346.79	0.817721	346.79	0.717043
346.99	0.818218	346.99	0.719877
347.19	0.817298	347.19	0.719185
347.39	0.817941	347.39	0.716924
347.59	0.818537	347.59	0.720014
347.79	0.821832	347.79	0.719993
347.99	0.821963	347.99	0.722471
348.19	0.822078	348.19	0.720774
348.39	0.82232	348.39	0.718733
348.59	0.82341	348.59	0.723224
348.79	0.827621	348.79	0.724447
348.99	0.828116	348.99	0.722341
349.19	0.825379	349.19	0.725803
349.39	0.826162	349.39	0.728461
349.59	0.828102	349.59	0.724531
349.79	0.827225	349.79	0.725735
349.99	0.826108	349.99	0.728636
350.19	0.83118	350.19	0.726395
350.39	0.82937	350.39	0.732854
350.59	0.834775	350.59	0.732487
350.79	0.835682	350.79	0.733634
350.99	0.835743	350.99	0.731735
351.19	0.835188	351.19	0.73452
351.39	0.838957	351.39	0.736911
351.59	0.839009	351.59	0.738128
351.79	0.834615	351.79	0.736586
351.99	0.840665	351.99	0.739351
352.19	0.838993	352.19	0.737047
352.39	0.838911	352.39	0.740437
352.59	0.84503	352.59	0.736592
352.79	0.845871	352.79	0.742226
352.99	0.844874	352.99	0.736902
353.19	0.848827	353.19	0.744419
353.39	0.845073	353.39	0.743996
353.59	0.842535	353.59	0.746384
353.79	0.847375	353.79	0.745498
353.99	0.849364	353.99	0.74554
354.19	0.84876	354.19	0.748378
354.39	0.850811	354.39	0.748449
354.59	0.850702	354.59	0.748624
354.79	0.854649	354.79	0.749662
354.99	0.852916	354.99	0.750037
355.19	0.852827	355.19	0.750412
355.39	0.855168	355.39	0.751005
355.59	0.85339	355.59	0.754301
355.79	0.853012	355.79	0.753876
355.99	0.860897	355.99	0.753292
356.19	0.857226	356.19	0.75356
356.39	0.85672	356.39	0.753074
356.59	0.858429	356.59	0.757653
356.79	0.86357	356.79	0.754796
356.99	0.864122	356.99	0.758726
357.19	0.865077	357.19	0.75688
357.39	0.861424	357.39	0.760201
357.59	0.869154	357.59	0.763035
357.79	0.865426	357.79	0.761914
357.99	0.868003	357.99	0.761329
358.19	0.867943	358.19	0.762683
358.39	0.866913	358.39	0.761711
358.59	0.868726	358.59	0.768227
358.79	0.872486	358.79	0.762734
358.99	0.870166	358.99	0.764548
359.19	0.874187	359.19	0.766145
359.39	0.872165	359.39	0.76742
359.59	0.874472	359.59	0.769315
359.79	0.876442	359.79	0.772165
359.99	0.879007	359.99	0.771524
360.19	0.875589	360.19	0.769355
360.39	0.878735	360.39	0.774595
360.59	0.882982	360.59	0.770594
360.79	0.878184	360.79	0.773155
360.99	0.883506	360.99	0.772624
361.19	0.884034	361.19	0.775923
361.39	0.885183	361.39	0.774094
361.59	0.885826	361.59	0.776465
361.79	0.884412	361.79	0.777085
361.99	0.883488	361.99	0.774199
362.19	0.88912	362.19	0.778215
362.39	0.886258	362.39	0.772854
362.59	0.886113	362.59	0.778966
362.79	0.889372	362.79	0.776944
362.99	0.891992	362.99	0.786823
363.19	0.89046	363.19	0.785557
363.39	0.893124	363.39	0.782221
363.59	0.894887	363.59	0.781812
363.79	0.894642	363.79	0.785725
363.99	0.895111	363.99	0.785173
364.19	0.898274	364.19	0.786825
364.39	0.896854	364.39	0.787144
364.59	0.898323	364.59	0.786423
364.79	0.898391	364.79	0.788447
364.99	0.903196	364.99	0.79053
365.19	0.900684	365.19	0.793695
365.39	0.898644	365.39	0.791021
365.59	0.905093	365.59	0.792427
365.79	0.903242	365.79	0.793408
365.99	0.903836	365.99	0.793017
366.19	0.907127	366.19	0.794686
366.39	0.904682	366.39	0.796357
366.59	0.910613	366.59	0.79787
366.79	0.907867	366.79	0.796812
366.99	0.908573	366.99	0.798491
367.19	0.909456	367.19	0.799409
367.39	0.911734	367.39	0.798755
367.59	0.915297	367.59	0.802625
367.79	0.913399	367.79	0.799565
367.99	0.916176	367.99	0.798811
368.19	0.914146	368.19	0.803384
368.39	0.915427	368.39	0.804299
368.59	0.919876	368.59	0.807149
368.79	0.917703	368.79	0.803703
368.99	0.919782	368.99	0.80204
369.19	0.916538	369.19	0.804485
369.39	0.919312	369.39	0.808545
369.59	0.923347	369.59	0.80639
369.79	0.923771	369.79	0.806628
369.99	0.924464	369.99	0.808922
370.19	0.923793	370.19	0.814393
370.39	0.925175	370.39	0.811362
370.59	0.928382	370.59	0.810732
370.79	0.923574	370.79	0.810733
370.99	0.928062	370.99	0.810661
371.19	0.929502	371.19	0.814756
371.39	0.933366	371.39	0.8173
371.59	0.929293	371.59	0.816208
371.79	0.927828	371.79	0.816768
371.99	0.933883	371.99	0.817232
372.19	0.935886	372.19	0.817106
372.39	0.934509	372.39	0.819247
372.59	0.93321	372.59	0.820125
372.79	0.931929	372.79	0.8224
372.99	0.939408	372.99	0.821509
373.19	0.939961	373.19	0.822961
373.39	0.941707	373.39	0.821295
373.59	0.936399	373.59	0.820963
373.79	0.941211	373.79	0.823252
373.99	0.943479	373.99	0.826044
374.19	0.942411	374.19	0.826591
374.39	0.943741	374.39	0.826447
374.59	0.942352	374.59	0.827642
374.79	0.948549	374.79	0.828862
374.99	0.947867	374.99	0.82796
375.19	0.947714	375.19	0.831433
375.39	0.949562	375.39	0.830823
375.59	0.952919	375.59	0.830622
375.79	0.951883	375.79	0.83241
375.99	0.953935	375.99	0.831938
376.19	0.953001	376.19	0.833303
376.39	0.954728	376.39	0.832641
376.59	0.954504	376.59	0.837509
376.79	0.951168	376.79	0.83351
376.99	0.953903	376.99	0.836726
377.19	0.956427	377.19	0.837696
377.39	0.95966	377.39	0.840473
377.59	0.96033	377.59	0.837148
377.79	0.959968	377.79	0.839934
377.99	0.958396	377.99	0.843307
378.19	0.967121	378.19	0.843095
378.39	0.961842	378.39	0.844238
378.59	0.965382	378.59	0.843426
378.79	0.964459	378.79	0.846255
378.99	0.964294	378.99	0.844598
379.19	0.96318	379.19	0.843112
379.39	0.966135	379.39	0.845998
379.59	0.967776	379.59	0.847134
379.79	0.96964	379.79	0.849057
379.99	0.964673	379.99	0.847985
380.19	0.969791	380.19	0.850134
380.39	0.970453	380.39	0.846561
380.59	0.972957	380.59	0.849442
380.79	0.973004	380.79	0.850044
380.99	0.973221	380.99	0.852913
381.19	0.976992	381.19	0.853127
381.39	0.972483	381.39	0.851427
381.59	0.97791	381.59	0.855656
381.79	0.979395	381.79	0.858015
381.99	0.981136	381.99	0.856059
382.19	0.977004	382.19	0.855279
382.39	0.981729	382.39	0.861227
382.59	0.981443	382.59	0.856125
382.79	0.984486	382.79	0.85841
382.99	0.984429	382.99	0.861639
383.19	0.984318	383.19	0.855849
383.39	0.987468	383.39	0.86154
383.59	0.987587	383.59	0.865851
383.79	0.987222	383.79	0.860759
383.99	0.992937	383.99	0.859399
384.19	0.989505	384.19	0.863647
384.39	0.990386	384.39	0.867737
384.59	0.991686	384.59	0.869676
384.79	0.990367	384.79	0.869307
384.99	0.99156	384.99	0.867015
385.19	0.997224	385.19	0.868816
385.39	0.993407	385.39	0.870701
385.59	0.992907	385.59	0.87058
385.79	0.996459	385.79	0.867521
385.99	0.997556	385.99	0.871322
386.19	1.00179	386.19	0.872769
386.39	0.997984	386.39	0.876625
386.59	1.00209	386.59	0.87593
386.79	1.00343	386.79	0.875857
386.99	1.00417	386.99	0.878143
387.19	1.00462	387.19	0.875134
387.39	1.00266	387.39	0.875415
387.59	1.00616	387.59	0.877709
387.79	1.00969	387.79	0.878647
387.99	1.00925	387.99	0.878094
388.19	1.00922	388.19	0.878842
388.39	1.00891	388.39	0.877655
388.59	1.00763	388.59	0.880597
388.79	1.01145	388.79	0.882703
388.99	1.01216	388.99	0.882607
389.19	1.01566	389.19	0.879302
389.39	1.0146	389.39	0.882722
389.59	1.01466	389.59	0.88944
389.79	1.01265	389.79	0.88605
389.99	1.01865	389.99	0.887014
390.19	1.0144	390.19	0.88835
390.39	1.02008	390.39	0.885185
390.59	1.01602	390.59	0.889747
390.79	1.01887	390.79	0.889271
390.99	1.0235	390.99	0.894729
391.19	1.02111	391.19	0.893329
391.39	1.0263	391.39	0.891276
391.59	1.02576	391.59	0.897395
391.79	1.02263	391.79	0.897337
391.99	1.02687	391.99	0.897439
392.19	1.0272	392.19	0.896911
392.39	1.03155	392.39	0.899724
392.59	1.02863	392.59	0.89603
392.79	1.02553	392.79	0.899843
392.99	1.03208	392.99	0.899412
393.19	1.0318	393.19	0.902893
393.39	1.03021	393.39	0.898055
393.59	1.03356	393.59	0.900856
393.79	1.03185	393.79	0.90353
393.99	1.03358	393.99	0.902881
394.19	1.0397	394.19	0.900763
394.39	1.03574	394.39	0.9063
394.59	1.03663	394.59	0.909357
394.79	1.03939	394.79	0.904408
394.99	1.03745	394.99	0.906977
395.19	1.03907	395.19	0.91008
395.39	1.03884	395.39	0.912558
395.59	1.04408	395.59	0.909416
395.79	1.04534	395.79	0.913657
395.99	1.04209	395.99	0.908786
396.19	1.04656	396.19	0.912556
396.39	1.04705	396.39	0.915728
396.59	1.04778	396.59	0.914943
396.79	1.04888	396.79	0.912634
396.99	1.04612	396.99	0.913709
397.19	1.0536	397.19	0.915777
397.39	1.0518	397.39	0.916116
397.59	1.04956	397.59	0.917838
397.79	1.05499	397.79	0.918769
397.99	1.05318	397.99	0.915563
398.19	1.05151	398.19	0.916753
398.39	1.05726	398.39	0.920741
398.59	1.05587	398.59	0.915873
398.79	1.05491	398.79	0.925399
398.99	1.05786	398.99	0.922614
[truncated: 24,773 more rows]

## Sheet: rep2
2019-07-31
raw data
J-IRE1 P108A		J-IRE1 Q105C ox.
Time (s)	Displacement	Time (s)	Displacement
0	0	0	0	equilibrate in reaction buffer
0.2	-0.00572522	0.2	0.00127819
0.4	-0.00157312	0.4	-0.00162075
0.6	-0.00189701	0.6	0.00420027
0.79	-0.00309832	0.79	-0.00181154
1	-0.0024935	1	-0.00046901
1.2	-0.00563317	1.2	-8.033e-05
1.39	-0.00290234	1.39	0.00263409
1.6	-0.00195445	1.6	0.00085247
1.79	-0.0023129	1.79	-0.00158172
2	0.00019372	2	-0.00356375
2.19	0.00136712	2.19	-0.00227803
2.39	-0.00050812	2.39	-0.00050263
2.59	0.0029868	2.59	-0.0014462
2.79	0.00063717	2.79	-0.00023082
2.99	-0.00172753	2.99	0.00053585
3.19	-0.00184509	3.19	0.00307731
3.39	-0.00194062	3.39	-0.00110748
3.59	-0.0005091	3.59	-0.00188542
3.79	-0.00373362	3.79	0.00086282
3.99	-0.00107632	3.99	0.00307774
4.19	-0.0010479	4.19	0.00023244
4.39	0.001776	4.39	-0.00396443
4.59	0.00043957	4.59	-0.00195749
4.8	7.459e-05	4.8	-0.00576401
4.99	0.00103726	4.99	-0.00087454
5.19	0.00181093	5.19	-0.00119723
5.39	0.00126368	5.39	-0.00396071
5.59	0.00137275	5.59	-0.00322742
5.79	0.00115678	5.79	0.00215719
5.99	-0.00142449	5.99	0.00094333
6.19	-0.00109196	6.19	-0.00123273
6.39	0.00211593	6.39	0.00297997
6.59	0.00029116	6.59	0.00122638
6.8	0.00272822	6.8	-0.00056621
6.99	-0.00135542	6.99	0.00067438
7.19	-0.00159931	7.19	0.00041592
7.39	0.00074868	7.39	0.00020595
7.59	-0.00058306	7.59	0.00191208
7.8	0.00421705	7.8	-0.00048871
7.99	0.00177456	7.99	-0.00486613
8.19	0.00142736	8.19	0.00162928
8.39	0.00241681	8.39	0.00464361
8.6	-0.0005152	8.6	-0.00056832
8.8	0.00064157	8.8	-0.0011378
8.99	0.00181004	8.99	0.00388966
9.19	0.00084842	9.19	-0.00040174
9.39	0.00452716	9.39	0.00301243
9.6	0.00045956	9.6	-0.0007415
9.79	0.0003707	9.79	0.00256133
9.99	0.00250965	9.99	0.00215053
10.19	-0.00258329	10.19	0.00092992
10.39	0.00272423	10.39	-1.87e-05
10.59	0.00385254	10.59	-0.0013229
10.79	0.00186532	10.79	0.00157137
10.99	0.00455013	10.99	0.00148556
11.19	0.00021215	11.19	0.00237747
11.39	-9.028e-05	11.39	-0.00038458
11.59	-0.00146528	11.59	0.00085945
11.79	0.00329116	11.79	0.00165624
11.99	0.00150057	11.99	0.0002601
12.19	0.00029187	12.19	0.00381048
12.39	-0.00022521	12.39	-0.00141602
12.59	0.00400317	12.59	0.0008336
12.8	-0.00215317	12.8	0.00538947
12.99	-0.0003486	12.99	0.00238209
13.19	0.00199669	13.19	0.0051994
13.39	0.00175453	13.39	-0.00049528
13.6	0.00410572	13.6	0.00408681
13.79	0.00279991	13.79	0.00289608
13.99	0.00240852	13.99	4.849e-05
14.19	0.00057946	14.19	-0.00103137
14.39	-0.00049051	14.39	0.00220441
14.6	-0.00184185	14.6	0.00019297
14.79	0.00271651	14.79	-0.0030584
14.99	-0.00065876	14.99	-0.00288
15.19	0.00119743	15.19	0.00321843
15.39	0.00194019	15.39	0.00142386
15.59	-0.0015776	15.59	-0.00202668
15.79	0.00278926	15.79	0.0026313
15.99	0.00254704	15.99	0.00347682
16.2	0.0034145	16.2	0.00165418
16.39	0.00131403	16.39	0.00246631
16.59	0.00142989	16.59	0.00239302
16.79	0.00372711	16.79	0.00275691
17	0.00307495	17	0.00130256
17.19	0.0032641	17.19	0.00105169
17.39	0.00389097	17.39	0.00111665
17.59	0.00352431	17.59	0.00384433
17.8	0.00453951	17.8	-0.00048179
17.99	0.00496196	17.99	0.00426263
18.19	0.00315007	18.19	0.0008801
18.39	0.0033245	18.39	0.00348488
18.59	0.00522615	18.59	-0.00188259
18.79	-0.00032004	18.79	0.00374828
19	0.0004104	19	0.00661101
19.2	0.00304454	19.2	-0.00054837
19.4	0.00241949	19.4	-0.00306371
19.6	0.0051646	19.6	-0.0004764
19.8	0.00385592	19.8	0.0025142
20	0.00362807	20	-0.00163947
20.2	-0.00115736	20.2	-0.0021867
20.4	0.00225905	20.4	0.00359051
20.6	0.00061038	20.6	-0.00153245
20.8	0.00109685	20.8	-0.00095812
21	0.00287432	21	0.0010097
21.19	-0.0001015	21.19	0.00364727
21.4	0.00391455	21.4	0.00144687
21.6	0.00061839	21.6	0.00185487
21.8	0.00236509	21.8	0.00567108
22	0.00471005	22	0.00275055
22.2	0.00313241	22.2	-0.00170069
22.4	0.00054415	22.4	0.00444394
22.6	0.00221653	22.6	0.00270377
22.8	0.00601265	22.8	0.00328165
22.99	0.0025949	22.99	0.00163492
23.2	0.004934	23.2	0.00116104
23.4	0.00296294	23.4	0.00031283
23.6	-3.33e-05	23.6	0.0091531
23.79	0.00332897	23.79	0.00037826
24	0.00482698	24	0.00194455
24.2	0.00026154	24.2	0.00127535
24.4	0.00649914	24.4	0.00230232
24.59	0.0038321	24.59	0.00403619
24.8	0.00498977	24.8	0.00812489
25	0.0103096	25	0.00325018
25.2	0.00533803	25.2	-0.00288286
25.4	0.00463939	25.4	0.00249933
25.6	0.00317241	25.6	0.00276199
25.8	0.00509789	25.8	0.00157511
25.99	0.0011869	25.99	0.00466896
26.19	0.00508238	26.19	0.00185646
26.4	0.00584618	26.4	-0.00110861
26.6	0.00424424	26.6	0.00265632
26.8	0.00438306	26.8	0.00550504
26.99	0.0040931	26.99	0.00402133
27.19	0.00468806	27.19	0.00159978
27.4	0.0037527	27.4	0.00051924
27.6	0.00502221	27.6	0.00193008
27.79	0.00180237	27.79	0.00655084
28	0.00522992	28	0.00254051
28.2	0.00371578	28.2	0.00313762
28.4	0.00379543	28.4	0.00412853
28.59	0.00573767	28.59	-0.0008999
28.79	0.00752592	28.79	0.00439683
29	0.00334587	29	0.0041268
29.2	0.00552652	29.2	0.0030153
29.39	0.00323204	29.39	0.00116294
29.59	0.00663576	29.59	0.00299969
29.8	0.0052916	29.8	0.00096603
30	0.00390674	30	0.0044922
30.19	0.00278516	30.19	0.00217962
30.39	0.00228721	30.39	0.00372367
30.59	0.00130756	30.59	0.00588701
30.8	0.00311806	30.8	0.00590541
30.99	0.00499277	30.99	0.00126405
31.19	0.00301655	31.19	0.00323415
31.4	0.00241455	31.4	0.00318376
31.6	0.00287507	31.6	-0.00027457
31.79	0.00083338	31.79	0.00501632
31.99	0.00343652	31.99	0.00227994
32.19	0.00829148	32.19	0.00147882
32.4	0.00764343	32.4	0.00120763
32.59	0.00762759	32.59	0.00309439
32.79	0.00288716	32.79	0.00728114
32.99	0.0057861	32.99	0.00094224
33.19	0.00120717	33.19	0.00160436
33.4	0.00277684	33.4	0.00146319
33.59	0.00207411	33.59	0.00390584
33.79	0.00341331	33.79	0.00315531
33.99	0.00137012	33.99	0.00339534
34.19	-0.00032733	34.19	-0.00148688
34.39	0.0025085	34.39	-0.00205089
34.59	0.00656664	34.59	0.00303083
34.79	0.00141246	34.79	0.00451158
34.99	0.00472984	34.99	0.00271973
35.19	0.00456901	35.19	0.00206673
35.39	0.00347708	35.39	0.00217343
35.59	0.00322787	35.59	0.00429179
35.79	0.00454102	35.79	0.00234817
35.99	0.00399045	35.99	0.00354913
36.19	0.0057772	36.19	0.00325391
36.39	0.00523585	36.39	0.00184849
36.59	0.00456039	36.59	0.00195451
36.79	0.00365441	36.79	0.00092305
36.99	0.00444498	36.99	0.00807784
37.19	0.00611245	37.19	0.00238821
37.39	0.0025759	37.39	0.00469547
37.59	0.0034543	37.59	-0.00102792
37.79	0.00454983	37.79	0.00335737
37.99	0.00862084	37.99	0.00227494
38.19	0.00320875	38.19	0.00233473
38.39	0.00524589	38.39	0.0041584
38.59	0.005988	38.59	0.0010896
38.79	0.00370951	38.79	0.00329313
38.99	0.00442234	38.99	2.853e-05
39.19	0.00240152	39.19	0.0018109
39.4	0.00332755	39.4	0.00184559
39.59	0.00479843	39.59	0.00603268
39.79	0.00331629	39.79	0.00423608
39.99	0.00810236	39.99	-0.00037352
40.19	0.00698506	40.19	0.00259061
40.4	0.00657794	40.4	0.00352099
40.59	0.00386184	40.59	0.00466989
40.79	0.00644694	40.79	0.00209893
40.99	0.00371885	40.99	0.00333805
41.19	0.00789838	41.19	0.00017614
41.4	0.00156799	41.4	-0.00033966
41.59	0.00702313	41.59	0.00369214
41.79	0.00733461	41.79	0.00802654
41.99	0.00409704	41.99	0.00167355
42.19	0.00375663	42.19	0.00736045
42.4	0.0068227	42.4	0.00750181
42.59	0.00961764	42.59	0.00125323
42.79	0.00771311	42.79	0.00439315
42.99	0.00817201	42.99	0.00259666
43.19	0.0037447	43.19	0.00092564
43.4	0.00548849	43.4	0.00457111
43.59	0.0048008	43.59	0.00468498
43.79	0.00514605	43.79	0.00292822
43.99	0.00581902	43.99	0.00231749
44.19	0.00873232	44.19	0.00647983
44.4	0.00693798	44.4	0.00637763
44.59	0.00396209	44.59	0.0045541
44.79	0.0040854	44.79	0.00387472
44.99	0.00368272	44.99	0.00455104
45.19	0.00731776	45.19	0.00384881
45.4	0.00398654	45.4	0.00504275
45.59	0.00884431	45.59	0.00617907
45.79	0.00377952	45.79	0.00589936
45.99	0.00611772	45.99	0.00332672
46.19	0.00928335	46.19	0.00058738
46.4	0.00524898	46.4	0.00642924
46.59	0.0100156	46.59	-0.00068393
46.79	0.00604846	46.79	0.00328244
46.99	0.00825403	46.99	0.00084225
47.19	0.00663408	47.19	0.00226105
47.39	0.00418528	47.39	0.00333647
47.59	0.0102279	47.59	0.00491853
47.79	0.00846026	47.79	0.00992725
47.99	0.00520406	47.99	0.00239235
48.19	0.00991223	48.19	0.00585552
48.4	0.00675982	48.4	0.00584655
48.59	0.00863803	48.59	0.00423802
48.79	0.00769135	48.79	0.0068151
48.99	0.00620695	48.99	0.00215369
49.19	0.00658849	49.19	0.00175102
49.4	0.00570722	49.4	0.00313256
49.59	0.00549777	49.59	0.0019681
49.79	0.00255361	49.79	0.00658689
49.99	0.00801282	49.99	0.00739177
50.19	0.00623855	50.19	0.00793981
50.4	0.00440822	50.4	0.00466489
50.59	0.00373032	50.59	0.00500291
50.79	0.00728643	50.79	0.00418194
50.99	0.00485936	50.99	0.00344847
51.19	0.0086939	51.19	0.00470524
51.39	0.0113996	51.39	0.00354195
51.59	0.0089934	51.59	0.0054137
51.79	0.00403007	51.79	0.00467105
51.99	0.00798422	51.99	0.00236983
52.19	0.00535724	52.19	-0.00044368
52.39	0.00589308	52.39	0.00093548
52.59	0.0085075	52.59	0.00693026
52.79	0.00709513	52.79	0.00412083
52.99	0.00340232	52.99	0.0037548
53.19	0.006755	53.19	0.00410254
53.39	0.00316774	53.39	0.00508521
53.59	0.00941441	53.59	0.00757479
53.79	0.00991343	53.79	0.00516266
53.99	0.0042373	53.99	0.00359395
54.19	0.00301165	54.19	0.00408244
54.4	0.00436639	54.4	0.00296633
54.59	0.00690524	54.59	0.00752301
54.79	0.00582835	54.79	0.00661733
54.99	0.00633417	54.99	0.00063098
55.19	0.00581565	55.19	0.0050868
55.4	0.00818469	55.4	0.00418836
55.59	0.00613837	55.59	0.00387138
55.79	0.00596488	55.79	0.00465313
55.99	0.00960609	55.99	0.00362183
56.19	0.00892305	56.19	0.00616486
56.39	0.00585814	56.39	0.0050354
56.59	0.00670133	56.59	0.00048411
56.79	0.00881689	56.79	0.00186325
56.99	0.011332	56.99	0.00479025
57.19	0.00637709	57.19	0.00708251
57.39	0.00268544	57.39	0.00332708
57.59	0.0100343	57.59	0.00659055
57.79	0.00599603	57.79	0.00116405
57.99	0.0110288	57.99	0.00261983
58.19	0.00795449	58.19	0.00464622
58.4	0.00927334	58.4	0.00228954
58.59	0.00586736	58.59	-0.00102958
58.79	0.00475813	58.79	0.00418672
58.99	0.00653333	58.99	0.00122838
59.19	0.00508714	59.19	0.00410989
59.4	0.00773469	59.4	0.00697215
59.59	0.00713626	59.59	0.00539771
59.79	0.00064952	59.79	0.00229466
59.99	0.00426396	59.99	0.00451867
60.19	0.00478469	60.19	0.00659612
60.39	0.00843939	60.39	0.00468766
60.59	0.00379899	60.59	0.00730628
60.79	0.00136228	60.79	0.00498459
60.99	0.00733333	60.99	0.00632717
61.19	0.00853686	61.19	0.00341222
61.4	0.00875001	61.4	0.00433787
61.59	0.00818009	61.59	0.0057663
61.79	0.00561985	61.79	0.0064855
61.99	0.00947475	61.99	0.00231891
62.19	0.00923822	62.19	0.00112875
62.4	0.0117798	62.4	0.00083268
62.59	0.00421939	62.59	0.00636679
62.79	0.00680863	62.79	0.00400913
62.99	0.00150697	62.99	0.0101002
63.19	0.00384486	63.19	0.00297998
63.4	0.0110579	63.4	0.00519876
63.59	0.0109925	63.59	0.00519638
63.79	0.00891977	63.79	0.00265092
63.99	0.00703947	63.99	0.00111522
64.19	0.00622352	64.19	0.00762342
64.4	0.0082295	64.4	0.00193086
64.59	0.00650854	64.59	0.00611937
64.8	0.00748722	64.8	0.00398837
65	0.00613136	65	0.00221235
65.19	0.00524313	65.19	0.00212963
65.39	0.00976957	65.39	0.005713
65.6	0.00619655	65.6	0.00262392
65.8	0.0105298	65.8	0.0009289
66	0.00725891	66	0.00518633
66.19	0.00742208	66.19	0.00293096
66.4	0.00769721	66.4	0.00372337
66.6	0.00658934	66.6	0.00288347
66.8	0.00867564	66.8	0.00354117
66.99	0.00310104	66.99	0.00161237
67.19	0.00602937	67.19	0.00331454
67.4	0.00675022	67.4	0.00362487
67.6	0.00383033	67.6	0.00151786
67.79	0.00496617	67.79	0.00419632
67.99	0.00707611	67.99	0.00494604
68.19	0.00619397	68.19	0.00449456
68.4	0.00652508	68.4	0.00596971
68.59	0.00608548	68.59	0.00774032
68.79	0.0114993	68.79	0.00346338
69	0.00848797	69	0.00410251
69.19	0.00986984	69.19	0.00546698
69.39	0.00748528	69.39	0.00260138
69.59	0.00408084	69.59	0.0019513
69.8	0.00650713	69.8	0.00676627
70	0.00744795	70	0.00208445
70.19	0.00850657	70.19	0.00253377
70.39	0.00553894	70.39	0.00651339
70.6	0.00330705	70.6	0.00303781
70.8	0.00779709	70.8	0.00323963
71	0.00522243	71	0.00330759
71.19	0.00858271	71.19	0.00605596
71.39	0.00167819	71.39	0.0022686
71.6	0.00383164	71.6	0.00622634
71.8	0.00916322	71.8	0.00165827
71.99	0.00563669	71.99	0.00318365
72.19	0.00778328	72.19	0.00324014
72.4	0.00289746	72.4	0.00341333
72.6	0.010389	72.6	0.00669274
72.79	0.00923532	72.79	-0.00041479
72.99	0.0099295	72.99	0.0018628
73.19	0.00707314	73.19	0.00466519
73.39	0.00775762	73.39	0.00156118
73.59	0.00567864	73.59	0.00569279
73.79	0.00852292	73.79	0.00384652
73.99	0.00900495	73.99	0.00445979
74.19	0.00815249	74.19	0.00312175
74.39	0.0104381	74.39	0.00297262
74.59	0.0108681	74.59	0.00195386
74.79	0.00632396	74.79	0.0061271
75	0.0072955	75	0.00397662
75.19	0.00521032	75.19	0.00024638
75.39	0.00991717	75.39	0.00161173
75.59	0.0042523	75.59	0.00285775
75.79	0.00974495	75.79	-0.00019991
75.99	0.0102494	75.99	0.00072844
76.19	0.00632798	76.19	0.00289931
76.39	0.00779622	76.39	0.00221471
76.6	0.00409065	76.6	0.00185946
76.8	0.0115308	76.8	0.00677791
76.99	0.00436228	76.99	0.0072539
77.19	0.0113615	77.19	0.00910858
77.4	0.00553953	77.4	0.0065678
77.6	0.00203839	77.6	0.00307224
77.8	0.00790788	77.8	0.00361012
78	0.00657186	78	8.713e-05
78.19	0.00785978	78.19	0.00238022
78.4	0.0090092	78.4	0.00552129
78.6	0.0119957	78.6	0.00272437
78.8	0.00581872	78.8	0.00256562
79	0.00677382	79	0.00341631
79.19	0.0115537	79.19	0.0038279
79.4	0.00766101	79.4	0.00611384
79.6	0.00715895	79.6	-0.00161219
79.8	0.00656387	79.8	0.00801928
80	0.00709899	80	-0.00037966
80.19	0.00747402	80.19	0.00282742
80.4	0.00655939	80.4	0.00532667
80.6	0.0064678	80.6	0.00531415
80.79	0.00622721	80.79	0.00158186
81	0.00848072	81	0.00178782
81.19	0.00971201	81.19	0.00216985
81.4	0.00748794	81.4	0.00156054
81.6	0.0105014	81.6	0.00769686
81.8	0.00743557	81.8	0.00198115
82	0.00887227	82	-0.00030849
82.19	0.0106449	82.19	0.00255459
82.39	0.00833056	82.39	0.00118233
82.59	0.00865793	82.59	0.00299707
82.8	0.00816557	82.8	0.00070986
83	0.00704476	83	0.00145005
83.19	0.00921616	83.19	0.00187519
83.39	0.00622676	83.39	0.0054166
83.6	0.00373964	83.6	0.00602507
83.8	0.00733766	83.8	0.00191133
83.99	0.0055217	83.99	0.00085922
84.19	0.00655593	84.19	0.00236636
84.4	0.011713	84.4	0.00184883
84.6	0.00574631	84.6	0.00405626
84.79	0.00729933	84.79	0.00345376
85	0.0085606	85	0.00332471
85.19	0.00930426	85.19	0.00436585
85.4	0.00824923	85.4	0.00427207
85.6	0.00881995	85.6	-0.00096958
85.79	0.00382994	85.79	0.00501315
86	0.0082111	86	0.00418196
86.19	0.00613373	86.19	0.00444135
86.4	0.00989256	86.4	0.00433773
86.59	0.00778498	86.59	0.00322526
86.8	0.0105463	86.8	-0.00107353
87	0.00891842	87	0.0039652
87.19	0.00602804	87.19	0.00744414
87.39	0.0122649	87.39	0.00088402
87.59	0.00872875	87.59	0.00237904
87.8	0.00735378	87.8	0.00179022
88	0.0100972	88	0.00648502
88.19	0.010673	88.19	0.00112642
88.39	0.0133832	88.39	0.00231155
88.6	0.00786918	88.6	0.00348211
88.8	0.0137675	88.8	0.00449699
88.99	0.00930011	88.99	0.00121186
89.19	0.0103157	89.19	-0.00011262
89.4	0.00793269	89.4	-0.0024496
89.6	0.00554659	89.6	0.00209849
89.79	0.0054719	89.79	0.00546119
89.99	0.00762027	89.99	0.00417371
90.19	0.0103172	90.19	0.00020063
90.4	0.00689036	90.4	0.00386746
90.6	0.0106579	90.6	0.00229554
90.79	0.00694509	90.79	0.00515797
90.99	0.008635	90.99	-0.00021001
91.19	0.00894702	91.19	0.0058941
91.4	0.00785301	91.4	0.00444384
91.59	0.00914952	91.59	0.00445863
91.79	0.0058115	91.79	0.00208333
92	0.0111612	92	0.00136162
92.19	0.00534267	92.19	0.0018321
92.39	0.00846779	92.39	0.00176738
92.59	0.00960376	92.59	0.00354044
92.79	0.00892592	92.79	0.00663569
92.99	0.0101019	92.99	0.00548213
93.19	0.00900079	93.19	-0.00164754
93.39	0.00893646	93.39	-0.00051767
93.6	0.00655753	93.6	-0.00108323
93.8	0.00822522	93.8	0.00095505
93.99	0.0125671	93.99	0.00296825
94.19	0.00900213	94.19	0.00307138
94.39	0.00553023	94.39	-0.00265601
94.6	0.00588802	94.6	0.00455477
94.79	0.0110493	94.79	0.00261313
94.99	0.00614025	94.99	0.0044144
95.19	0.0113974	95.19	0.00260401
95.4	0.00868271	95.4	0.00141048
95.6	0.0100187	95.6	0.00419228
95.79	0.00870184	95.79	0.00403935
95.99	0.0104399	95.99	0.00292091
96.19	0.00481381	96.19	0.00243086
96.39	0.00712793	96.39	0.00155397
96.59	0.00912314	96.59	0.00714449
96.79	0.0112421	96.79	-0.00031472
96.99	0.00848944	96.99	0.00311504
97.19	0.00897381	97.19	0.00377733
97.4	0.0107854	97.4	0.0037455
97.6	0.0106308	97.6	0.00168717
97.8	0.0113802	97.8	0.00330897
98	0.00530032	98	0.00232451
98.19	0.00537401	98.19	0.004513
98.4	0.00853902	98.4	0.00328746
98.6	0.00755439	98.6	-0.00063611
98.8	0.00792447	98.8	0.00166281
99	0.00893744	99	0.00304758
99.19	0.0107722	99.19	0.00503265
99.4	0.00846957	99.4	0.0031004
99.59	0.0106839	99.59	0.00360456
99.8	0.00639673	99.8	0.00392357
100	0.00999573	100	0.00240177
100.19	0.0101695	100.19	0.00259017
100.39	0.0103432	100.39	0.00326614
100.6	0.00902444	100.6	0.00152862
100.8	0.00754545	100.8	0.00502135
101	0.0105856	101	0.00268464
101.19	0.00744162	101.19	0.0053283
101.4	0.0106435	101.4	0.00483637
101.6	0.00559229	101.6	0.00527569
101.8	0.00849668	101.8	-0.00116943
101.99	0.00966175	101.99	0.00188481
102.19	0.00921143	102.19	0.00126396
102.4	0.0101229	102.4	0.00528199
102.6	0.00919232	102.6	0.00375
102.8	0.00702248	102.8	0.0033245
103	0.00581632	103	0.00213237
103.19	0.00421599	103.19	0.00327208
103.4	0.00878276	103.4	0.00035452
103.6	0.00818617	103.6	0.00532589
103.79	0.00627683	103.79	0.0078546
104	0.00834567	104	0.00387908
104.19	0.0113553	104.19	-0.0019414
104.4	0.00776614	104.4	0.0034319
104.59	0.00605558	104.59	-0.00100126
104.8	0.00940958	104.8	0.00560227
105	0.0112368	105	0.00289573
105.19	0.0106299	105.19	0.00148443
105.39	0.00854949	105.39	-0.00059624
105.6	0.0111422	105.6	-0.00045568
105.8	0.00952721	105.8	0.00550852
106	0.00890028	106	0.00307745
106.19	0.00844053	106.19	0.00272025
106.39	0.00717333	106.39	0.00206932
106.6	0.00975169	106.6	0.00546138
106.79	0.0115686	106.79	0.00180052
106.99	0.00702686	106.99	-0.00036583
107.19	0.0125542	107.19	0.00435462
107.4	0.0059296	107.4	0.00167041
107.6	0.00883309	107.6	0.00371109
107.79	0.00650848	107.79	0.0024594
107.99	0.00795031	107.99	0.00297219
108.19	0.0116209	108.19	-0.00201625
108.4	0.00519701	108.4	0.00591079
108.59	0.00817081	108.59	0.0038785
108.79	0.00991429	108.79	0.00322529
108.99	0.0118999	108.99	0.00068066
109.19	0.00854285	109.19	0.00524934
109.4	0.0089031	109.4	0.00347289
109.59	0.0103723	109.59	0.00378679
109.79	0.00833645	109.79	0.00530409
110	0.0089485	110	0.00421023
110.19	0.00784718	110.19	0.00350643
110.39	0.00822599	110.39	-0.0006934
110.59	0.00779307	110.59	0.00213761
110.8	0.0120057	110.8	0.00254902
110.99	0.0104382	110.99	0.00376695
111.19	0.011234	111.19	0.00363574
111.39	0.0127715	111.39	0.0042047
111.6	0.0109105	111.6	0.00349921
111.79	0.0120047	111.79	0.00440534
111.99	0.0071707	111.99	-0.00168755
112.19	0.0113521	112.19	0.00705707
112.4	0.00789555	112.4	0.00219755
112.6	0.00977456	112.6	0.00127666
112.79	0.00619271	112.79	-0.00063327
112.99	0.0100411	112.99	0.00396086
113.19	0.00998228	113.19	0.00102553
113.4	0.0114393	113.4	0.00144671
113.59	0.00915703	113.59	-0.0015938
113.79	0.00917267	113.79	0.0016932
113.99	0.00887447	113.99	0.00138695
114.19	0.00984588	114.19	-0.00014028
114.4	0.00902206	114.4	0.00683635
114.59	0.00892271	114.59	0.00149626
114.79	0.00724182	114.79	0.00105388
114.99	0.00462918	114.99	0.00206444
115.19	0.0106569	115.19	0.00374101
115.39	0.0127957	115.39	0.00774298
115.59	0.00888531	115.59	0.00342949
115.79	0.00974552	115.79	0.00229737
115.99	0.00728516	115.99	0.00188997
116.19	0.00848234	116.19	0.00297664
116.39	0.00696623	116.39	0.00132981
116.59	0.0100008	116.59	0.00254364
116.79	0.00820746	116.79	0.00273557
117	0.00948024	117	0.00354933
117.19	0.00669402	117.19	0.00370371
117.4	0.00777694	117.4	0.00228235
117.6	0.0102437	117.6	0.00243608
117.8	0.00715985	117.8	0.00097932
118	0.00776918	118	0.00350929
118.19	0.00951303	118.19	0.00271209
118.39	0.00721031	118.39	0.00153826
118.6	0.00461425	118.6	0.00309033
118.8	0.00927635	118.8	-0.00042133
119	0.00840808	119	0.00187675
119.19	0.0119999	119.19	0.00610056
119.4	0.00546401	119.4	0.00453691
119.6	0.00678079	119.6	0.00044384
119.8	0.0103005	119.8	0.00498196
120	0.0112472	120	0.0024627
120.19	0.00734796	120.19	8.472e-05
120.4	0.0128182	120.4	0.00219261
120.6	0.00836	120.6	0.00020538
120.8	0.00773493	120.8	0.00592824
121	0.00845202	121	0.00101673
121.19	0.00696967	121.19	1.149e-05
121.4	0.00677587	121.4	0.00371935
121.59	0.0106684	121.59	0.00336168
121.8	0.00895405	121.8	0.00560279
122	0.00518688	122	0.0002858
122.19	0.00480663	122.19	0.00380496
122.39	0.00385192	122.39	0.00403093
122.6	0.00746031	122.6	0.00132708
122.8	0.0072535	122.8	0.00163478
123	0.00544506	123	-0.00120779
123.19	0.0107643	123.19	0.00173392
123.39	0.010256	123.39	0.0040079
123.6	0.0112033	123.6	0.00289721
123.8	0.00683064	123.8	0.00160347
124	0.0119673	124	0.00072536
124.19	0.00682012	124.19	0.00336629
124.4	0.00824424	124.4	-0.00120504
124.6	0.00796219	124.6	0.00109114
124.8	0.0101108	124.8	0.0034532
124.99	0.0099202	124.99	0.00116774
125.19	0.00881426	125.19	1.34e-05
125.4	0.00973043	125.4	0.00090142
125.6	0.0094419	125.6	0.00194258
125.79	0.00864094	125.79	-0.00299524
125.99	0.00855564	125.99	0.0009167
126.19	0.0103696	126.19	0.00324481
126.4	0.00563963	126.4	0.00623996
126.59	0.00697912	126.59	0.00290477
126.79	0.0104493	126.79	0.00119367
127	0.00727453	127	0.00099728
127.19	0.00952842	127.19	-0.00014445
127.39	0.00538051	127.39	0.00031554
127.6	0.00619015	127.6	0.0049561
127.79	0.0102095	127.79	0.00274258
128	0.0120964	128	0.00027452
128.19	0.00994988	128.19	0.00144156
128.39	0.00836034	128.39	-0.00200661
128.59	0.00508633	128.59	0.00120504
128.79	0.00863429	128.79	-0.00032753
128.99	0.00861719	128.99	0.00196756
129.19	0.00337678	129.19	0.00206088
129.39	0.00865946	129.39	0.00318517
129.6	0.0108909	129.6	0.00074062
129.79	0.00934745	129.79	0.00279501
129.99	0.00661707	129.99	0.00341618
130.19	0.00456257	130.19	0.00016016
130.39	0.00975893	130.39	-0.0020714
130.59	0.00611427	130.59	0.00016924
130.79	0.00509199	130.79	0.00204755
130.99	0.00633237	130.99	-0.00034974
131.19	0.00709997	131.19	0.00357211
131.39	0.00991534	131.39	0.00081973
131.59	0.00756536	131.59	0.00406771
131.79	0.00972537	131.79	0.00084012
131.99	0.00733464	131.99	-0.00144355
132.19	0.00550041	132.19	0.00424236
132.39	0.00780951	132.39	-0.00306513
132.59	0.00811481	132.59	0.00196616
132.79	0.00751053	132.79	0.0020023
132.99	0.0103361	132.99	-0.00195995
133.19	0.00925457	133.19	0.00030685
133.39	0.00951174	133.39	0.00340756
133.59	0.00799816	133.59	0.00455716
133.79	0.00358242	133.79	0.00205757
133.99	0.0106196	133.99	-6.484e-05
134.19	0.00415587	134.19	0.00249378
134.39	0.00873057	134.39	0.00038114
134.59	0.00901309	134.59	0.00211977
134.79	0.00727434	134.79	0.0032066
134.99	0.00885752	134.99	-0.00089793
135.19	0.00469649	135.19	0.00232863
135.39	0.00665556	135.39	0.00643929
135.59	0.0067871	135.59	0.00723119
135.79	0.00615302	135.79	0.00277836
135.99	0.00606325	135.99	-0.00120188
136.19	0.00791205	136.19	-0.00284398
136.39	0.0117418	136.39	0.00142204
136.6	0.00883854	136.6	0.00489868
136.79	0.00734405	136.79	0.00164677
136.99	0.00495909	136.99	0.00403825
137.19	0.0068046	137.19	0.00155174
137.39	0.00986415	137.39	5.35e-05
137.6	0.00773946	137.6	-0.00123172
137.79	0.00940009	137.79	-0.00514278
137.99	0.00899016	137.99	0.00273661
138.19	0.00874873	138.19	0.00223342
138.39	0.00695384	138.39	0.00073164
138.6	0.00706769	138.6	0.00224571
138.79	0.00575016	138.79	0.00435945
138.99	0.011764	138.99	0.00095726
139.19	0.00702564	139.19	0.00376184
139.39	0.00586634	139.39	0.00196778
139.59	0.0121187	139.59	0.00457604
139.79	0.00678658	139.79	0.00176961
139.99	0.00991677	139.99	0.003423
140.19	0.00733105	140.19	0.00089898
140.39	0.00832301	140.39	-0.00066097
140.6	0.00645671	140.6	-0.00110104
140.79	0.00516178	140.79	0.00050109
140.99	0.00590177	140.99	0.0030709
141.19	0.0118517	141.19	0.00236173
141.39	0.00916891	141.39	0.00249072
141.6	0.0118346	141.6	0.00174669
141.79	0.0105937	141.79	4.157e-05
141.99	0.0080168	141.99	0.00240372
142.19	0.00715888	142.19	0.00114548
142.39	0.011429	142.39	-0.0024778
142.6	0.00987278	142.6	0.0033391
142.79	0.00984249	142.79	0.00409885
142.99	0.00545288	142.99	-0.00252879
143.19	0.00861222	143.19	0.00116654
143.39	0.00866841	143.39	0.00362213
143.6	0.00951564	143.6	0.00208223
143.79	0.0111996	143.79	0.00420139
143.99	0.0111012	143.99	0.00120859
144.19	0.00721957	144.19	0.00012099
144.39	0.00711208	144.39	0.0007602
144.59	0.00633362	144.59	0.00056589
144.79	0.012082	144.79	0.001965
144.99	0.0116829	144.99	0.00106816
145.19	0.00936365	145.19	0.00548996
145.39	0.007373	145.39	0.00552319
145.6	0.00876918	145.6	0.0015905
145.79	0.00772735	145.79	-0.00041572
145.99	0.00762019	145.99	-2.43e-06
146.19	0.00880952	146.19	-0.00096285
146.39	0.00404547	146.39	-0.00227504
146.6	0.00752491	146.6	-0.00051226
146.79	0.00751053	146.79	-0.00202238
146.99	0.0106259	146.99	0.00112688
147.19	0.00709854	147.19	-9.336e-05
147.39	0.00758385	147.39	0.00135224
147.6	0.00594012	147.6	0.00164228
147.79	0.00521109	147.79	0.00187945
147.99	0.0111829	147.99	0.00241232
148.19	0.00741351	148.19	-0.00096689
148.39	0.00743589	148.39	0.00333033
148.59	0.0105948	148.59	0.0048627
148.79	0.0081729	148.79	0.00385201
148.99	0.00687901	148.99	0.00253762
149.19	0.0111904	149.19	0.00138782
149.39	0.00771335	149.39	0.00206332
149.59	0.00840672	149.59	0.00095403
149.79	0.0096663	149.79	-0.00095816
149.99	0.0101657	149.99	0.0014509
150.19	0.00657304	150.19	0.00185929
150.39	0.00740958	150.39	0.00289473
150.59	0.00823659	150.59	-0.00016953
150.79	0.00691571	150.79	0.00169303
150.99	0.0116582	150.99	0.00600789
151.19	0.0108937	151.19	0.00293687
151.39	0.00615996	151.39	0.00350983
151.59	0.0081905	151.59	0.00050664
151.79	0.00456005	151.79	0.00254246
151.99	0.00499462	151.99	-0.00062369
152.19	0.0090193	152.19	0.00248168
152.39	0.00832274	152.39	-0.00392092
152.59	0.00859876	152.59	0.00329428
152.79	0.00975885	152.79	0.00355547
152.99	0.00652775	152.99	-0.00231922
153.19	0.00560899	153.19	0.00047794
153.39	0.00974628	153.39	0.0039808
153.59	0.00860683	153.59	-0.00097501
153.79	0.0080035	153.79	-0.00075913
153.99	0.00826637	153.99	-0.00389185
154.19	0.00573526	154.19	0.00226975
154.39	0.00766313	154.39	-0.00105074
154.59	0.00994873	154.59	0.00462478
154.79	0.00055831	154.79	0.00460779
154.99	0.00968351	154.99	0.0038229
155.19	0.00662443	155.19	0.00050048
155.39	0.0118952	155.39	0.00208659
155.59	0.00868919	155.59	0.00213596
155.79	0.0081302	155.79	0.00659039
155.99	0.00687854	155.99	0.00456483
156.19	0.00669932	156.19	0.00599922
156.39	0.00838699	156.39	0.00332965
156.6	0.00805257	156.6	0.00030189
156.79	0.00710303	156.79	7.042e-05
156.99	0.00850138	156.99	0.00076667
157.19	0.0111322	157.19	0.00027193
157.39	0.00857309	157.39	0.00017911
157.6	0.00866148	157.6	-0.00171464
157.79	0.00877702	157.79	0.00176433
157.99	0.00560442	157.99	-0.00438657
158.19	0.0064905	158.19	-0.00318743
158.39	0.00369465	158.39	0.00121486
158.59	0.00597843	158.59	0.00038762
158.79	0.00888842	158.79	0.0016231
158.99	0.00801603	158.99	-0.00133249
159.19	0.00623258	159.19	0.00092794
159.39	0.0090425	159.39	5.787e-05
159.6	0.00243408	159.6	0.0032713
159.79	0.00984451	159.79	0.00208434
159.99	0.00902447	159.99	0.0017459
160.19	0.0113904	160.19	-0.0010897
160.39	0.00648698	160.39	-0.00023382
160.6	0.00723395	160.6	-0.00112547
160.79	0.0104709	160.79	-0.00275861
160.99	0.00580326	160.99	-0.00204566
161.19	0.00782062	161.19	0.00472047
161.39	0.00553789	161.39	-0.0006789
161.6	0.0119477	161.6	-0.0007073
161.79	0.0106449	161.79	-0.00399588
161.99	0.00733614	161.99	0.00216881
162.19	0.00848672	162.19	-0.00172535
162.39	0.00834898	162.39	0.00076422
162.6	0.00685999	162.6	8.982e-05
162.79	0.0112545	162.79	0.00199248
162.99	0.00834554	162.99	0.00153697
163.19	0.00736863	163.19	-0.00173816
163.39	0.00874014	163.39	0.00052322
163.6	0.00340352	163.6	0.00068996
163.79	0.00803538	163.79	0.00315512
163.99	0.00867836	163.99	1.531e-05
164.19	0.00464351	164.19	0.00123658
164.39	0.00938248	164.39	0.0080127
164.6	0.0105921	164.6	0.00468264
164.79	0.0104772	164.79	-8.768e-05
164.99	0.00859778	164.99	0.0004923
165.19	0.010616	165.19	-0.00187807
165.39	0.00512311	165.39	-0.00147199
165.6	0.00789554	165.6	0.00048453
165.79	0.0079992	165.79	-0.00077046
165.99	0.0103951	165.99	0.00504239
166.19	0.0104116	166.19	0.00069362
166.39	0.00706259	166.39	-0.00280728
166.6	0.00766578	166.6	-0.00196784
166.79	0.0117161	166.79	0.00216295
166.99	0.00587886	166.99	0.00142364
167.19	0.00889291	167.19	0.00268227
167.39	0.0106243	167.39	-0.00183232
167.59	0.00768721	167.59	0.00236734
167.79	0.00980409	167.79	0.00384166
167.99	0.0038115	167.99	0.00098556
168.19	0.00133311	168.19	0.00039988
168.39	0.0058907	168.39	0.00240748
168.59	0.00894904	168.59	-0.0006866
168.79	0.00939173	168.79	-0.00189226
168.99	0.00954918	168.99	0.00337141
169.19	0.0106406	169.19	0.00087447
169.39	0.00701389	169.39	-0.00127975
169.59	0.00705732	169.59	-0.0023752
169.79	0.00894009	169.79	-0.00082289
169.99	0.00813417	169.99	-0.00106299
170.19	0.00855666	170.19	-0.00026889
170.39	0.00731021	170.39	0.00091067
170.59	0.00598093	170.59	-0.00171676
170.79	0.00954488	170.79	0.00224779
170.99	0.00827237	170.99	0.00218598
171.19	0.00665352	171.19	-0.00053159
171.39	0.00868652	171.39	-9.372e-05
171.59	0.00834353	171.59	-0.00283306
171.79	0.0094699	171.79	-0.00298552
171.99	0.00671012	171.99	-0.00257603
172.19	0.00869363	172.19	-0.00144016
172.39	0.00530006	172.39	5.092e-05
172.59	0.00532985	172.59	0.00049197
172.79	0.00697563	172.79	0.0007815
172.99	0.00871056	172.99	0.00083605
173.19	0.0076891	173.19	-0.00045037
173.39	0.00700158	173.39	-0.00239363
173.59	0.00756927	173.59	0.0014346
173.79	0.00508895	173.79	0.00060671
173.99	0.00535246	173.99	0.00311534
174.19	0.00840393	174.19	-0.0030516
174.39	0.00847713	174.39	0.00289505
174.59	0.00512858	174.59	0.00086737
174.79	0.00748184	174.79	-0.00348835
174.99	0.00418502	174.99	0.00179269
175.19	0.00610519	175.19	0.00146886
175.39	0.00927409	175.39	0.00103727
175.6	0.00859615	175.6	0.00379091
175.79	0.0058008	175.79	-0.00305236
175.99	0.00229851	175.99	-0.00240605
176.19	0.00659272	176.19	-0.00121822
176.39	0.0106641	176.39	-0.00225042
176.6	0.00524701	176.6	-0.00240991
176.79	0.00564667	176.79	0.00403152
176.99	0.00369097	176.99	-0.00044188
177.19	0.00738187	177.19	0.00031262
177.39	0.00775423	177.39	0.00143427
177.6	0.00777478	177.6	-0.00046624
177.79	0.00860509	177.79	-0.00172291
177.99	0.00703941	177.99	0.00040114
178.19	0.00396658	178.19	-0.00026883
178.39	0.00555347	178.39	0.00070219
178.6	0.00940426	178.6	-0.00173775
178.79	0.00964678	178.79	-0.00173914
178.99	0.00676583	178.99	-0.00118815
179.19	0.00729299	179.19	-0.00230358
179.39	0.00762508	179.39	-0.00178905
179.6	0.00715714	179.6	-0.00067005
179.79	0.00808507	179.79	0.00018958
179.99	0.00639118	179.99	-0.00022602
180.19	0.0087365	180.19	0.0015206
180.39	0.00603436	180.39	-0.0001951
180.59	0.00881804	180.59	0.00033685
180.79	0.00977887	180.79	-0.00248704
180.99	0.0088512	180.99	6e-06
181.19	0.0068596	181.19	-0.00171452
181.39	0.00627924	181.39	-0.00227888
181.6	0.00718402	181.6	-0.00075297
181.79	0.00798935	181.79	-0.00362006
181.99	0.0105972	181.99	0.00049542
182.19	0.0053034	182.19	-0.00054751
182.39	0.00662702	182.39	-0.0003728
182.6	0.00856991	182.6	-0.00167514
182.79	0.00891092	182.79	-0.00405891
182.99	0.00704	182.99	0.00126224
183.19	0.00908588	183.19	0.00121111
183.39	0.00462277	183.39	0.00436942
183.6	0.00632773	183.6	0.00179986
183.79	0.00767697	183.79	0.00096798
183.99	0.0076579	183.99	-0.00123825
184.19	0.00462884	184.19	-0.00157753
184.39	0.00670188	184.39	0.000588
184.59	0.00493785	184.59	-0.0001344
184.79	0.00704107	184.79	0.0009553
184.99	0.0109245	184.99	0.00077855
185.19	0.00674456	185.19	0.00220737
185.39	0.00775554	185.39	-0.00201318
185.59	0.0105965	185.59	-0.00284143
185.79	0.00607771	185.79	0.00338218
185.99	0.00652361	185.99	-0.00090853
186.19	0.0115245	186.19	0.00149929
186.39	0.0107663	186.39	-0.00440069
186.59	0.00698088	186.59	0.00121714
186.79	0.00544445	186.79	-0.00072108
186.99	0.00635633	186.99	-0.00011712
187.19	0.00588262	187.19	-0.00395184
187.39	0.00776489	187.39	-0.00216862
187.59	0.00771818	187.59	-0.00098714
187.79	0.00973379	187.79	0.00059587
187.99	0.00459363	187.99	-0.00230379
188.19	0.00591673	188.19	-0.0025605
188.39	0.00399088	188.39	-0.00161401
188.6	0.00193903	188.6	-0.0002426
188.79	0.00864998	188.79	0.00145939
188.99	0.00946042	188.99	-0.00130421
189.19	0.0067686	189.19	0.000834
189.39	0.00422334	189.39	-0.00045148
189.59	0.00882566	189.59	-0.0005445
189.79	0.00705032	189.79	0.0012934
189.99	0.00458518	189.99	0.00363272
190.19	0.00495123	190.19	-0.00438322
190.39	0.0123118	190.39	0.00192439
190.59	0.0076828	190.59	-0.00178003
190.79	0.00949524	190.79	-3.095e-05
190.99	0.00446782	190.99	0.0023296
191.19	0.0105136	191.19	-0.00136761
191.39	0.00481759	191.39	-0.00046846
191.59	0.00843913	191.59	0.00241721
191.79	0.00557373	191.79	-0.00107708
191.99	0.0100586	191.99	-0.00431057
192.19	0.00620089	192.19	0.00137661
192.39	0.00792125	192.39	0.00040941
192.59	0.00853316	192.59	-0.00031703
192.79	0.00699322	192.79	0.00184186
192.99	0.00899482	192.99	-0.00024651
193.19	0.00560983	193.19	-0.00072724
193.39	0.00932774	193.39	-0.00450659
193.59	0.00630469	193.59	-0.00113047
193.79	0.00417844	193.79	0.00077243
193.99	0.00791771	193.99	0.00302414
194.19	0.00888593	194.19	-0.00420172
194.39	0.0034968	194.39	6.55e-05
194.59	0.00961948	194.59	0.00029827
194.79	0.00698782	194.79	0.00215105
194.99	0.010268	194.99	-0.00404488
195.19	0.0102416	195.19	-0.00211362
195.39	0.00655519	195.39	-0.00138759
195.6	0.00757988	195.6	-0.00030741
195.79	0.00490875	195.79	-0.00163611
195.99	0.00421249	195.99	-0.00191853
196.19	0.00251814	196.19	-0.00132111
196.39	0.00758847	196.39	-0.00477281
196.6	0.00781836	196.6	-0.003181
196.79	0.00579243	196.79	0.00023008
196.99	0.00997864	196.99	-0.00288077
197.19	0.0108773	197.19	-0.00041832
197.39	0.00137347	197.39	-4.533e-05
197.6	0.00766472	197.6	0.00039676
197.79	0.00389352	197.79	-0.00593046
197.99	0.00644842	197.99	-0.00019754
198.19	0.00685427	198.19	0.00194285
198.39	0.00384962	198.39	0.00053998
198.59	0.00869425	198.59	-0.00154266
198.79	0.00506639	198.79	-0.00430602
198.99	0.00703322	198.99	0.00122298	loading of proteins on tip
199.19	0.00950649	199.19	-0.00200268
199.39	0.00763042	199.39	-0.00014811
199.6	0.00817611	199.6	0.000734
199.79	0.00535896	199.79	-0.00305161
200	0.206742	200	0.111568
200.19	0.236153	200.19	0.127505
200.39	0.257164	200.39	0.137144
200.6	0.270142	200.6	0.143249
200.79	0.274507	200.79	0.146758
200.99	0.283506	200.99	0.151014
201.19	0.282679	201.19	0.150568
201.39	0.286507	201.39	0.15375
201.59	0.290212	201.59	0.156819
201.79	0.293397	201.79	0.156943
201.99	0.299522	201.99	0.157174
202.19	0.294982	202.19	0.160221
202.39	0.29784	202.39	0.162627
202.59	0.30047	202.59	0.158331
202.79	0.299722	202.79	0.160439
202.99	0.299518	202.99	0.164618
203.19	0.30269	203.19	0.162056
203.39	0.300827	203.39	0.16565
203.6	0.30042	203.6	0.160874
203.79	0.2979	203.79	0.163261
203.99	0.300564	203.99	0.165337
204.19	0.30044	204.19	0.165716
204.39	0.305874	204.39	0.16132
204.6	0.30598	204.6	0.161569
204.79	0.302541	204.79	0.165569
204.99	0.303944	204.99	0.165982
205.19	0.300763	205.19	0.165492
205.39	0.302625	205.39	0.170954
205.6	0.307769	205.6	0.171157
205.79	0.305492	205.79	0.166516
205.99	0.306485	205.99	0.166373
206.19	0.305604	206.19	0.167565
206.39	0.306721	206.39	0.172158
206.6	0.306528	206.6	0.1695
206.79	0.304065	206.79	0.170628
206.99	0.304083	206.99	0.166596
207.19	0.307933	207.19	0.172219
207.39	0.307939	207.39	0.169649
207.6	0.307473	207.6	0.175681
207.79	0.310164	207.79	0.176489
207.99	0.30879	207.99	0.170493
208.19	0.307421	208.19	0.17445
208.39	0.309314	208.39	0.174291
208.6	0.308199	208.6	0.172254
208.79	0.311071	208.79	0.174171
208.99	0.31543	208.99	0.173468
209.19	0.315408	209.19	0.175067
209.39	0.312212	209.39	0.17624
209.59	0.316178	209.59	0.173235
209.79	0.314562	209.79	0.175785
209.99	0.307628	209.99	0.171821
210.19	0.314994	210.19	0.176318
210.39	0.311299	210.39	0.175441
210.59	0.316131	210.59	0.177909
210.79	0.315384	210.79	0.171359
210.99	0.312668	210.99	0.180034
211.19	0.313793	211.19	0.180424
211.39	0.321861	211.39	0.177343
211.6	0.318078	211.6	0.176818
211.79	0.314214	211.79	0.18009
211.99	0.31777	211.99	0.181846
212.19	0.319266	212.19	0.182546
212.39	0.321267	212.39	0.182836
212.6	0.316761	212.6	0.1801
212.79	0.320174	212.79	0.180372
212.99	0.319553	212.99	0.182433
213.19	0.322323	213.19	0.186316
213.39	0.318714	213.39	0.18511
213.6	0.319239	213.6	0.183759
213.79	0.323621	213.79	0.183985
213.99	0.324013	213.99	0.187025
214.19	0.324784	214.19	0.18675
214.39	0.322131	214.39	0.184982
214.59	0.324011	214.59	0.182723
214.79	0.324256	214.79	0.185593
214.99	0.323965	214.99	0.187253
215.19	0.323963	215.19	0.186886
215.39	0.322673	215.39	0.185141
215.59	0.326087	215.59	0.191601
215.79	0.325925	215.79	0.187424
215.99	0.323857	215.99	0.189718
216.19	0.328541	216.19	0.192965
216.39	0.329795	216.39	0.191143
216.6	0.328482	216.6	0.19055
216.79	0.32803	216.79	0.191669
216.99	0.328241	216.99	0.19441
217.19	0.330584	217.19	0.188837
217.39	0.330215	217.39	0.190549
217.6	0.331951	217.6	0.195387
217.79	0.328689	217.79	0.192635
217.99	0.33348	217.99	0.195051
218.19	0.330428	218.19	0.194981
218.39	0.334249	218.39	0.193185
218.59	0.329801	218.59	0.195575
218.79	0.33312	218.79	0.197408
218.99	0.32817	218.99	0.19682
219.19	0.333479	219.19	0.194703
219.39	0.332882	219.39	0.19549
219.59	0.331489	219.59	0.192872
219.79	0.335925	219.79	0.198411
219.99	0.330975	219.99	0.194185
220.19	0.337798	220.19	0.192957
220.39	0.340426	220.39	0.196015
220.59	0.335687	220.59	0.198477
220.79	0.334718	220.79	0.199757
220.99	0.338415	220.99	0.202165
221.19	0.334994	221.19	0.202428
221.39	0.336873	221.39	0.195569
221.6	0.338624	221.6	0.201559
221.79	0.337749	221.79	0.197163
221.99	0.339966	221.99	0.203099
222.19	0.341048	222.19	0.207641
222.39	0.340352	222.39	0.198207
222.59	0.33786	222.59	0.199372
222.79	0.342988	222.79	0.202664
222.99	0.342018	222.99	0.205393
223.19	0.345815	223.19	0.207693
223.39	0.341527	223.39	0.205885
223.59	0.340903	223.59	0.206346
223.79	0.342204	223.79	0.206018
223.99	0.33792	223.99	0.205509
224.19	0.343888	224.19	0.206024
224.39	0.341534	224.39	0.207686
224.59	0.341429	224.59	0.206794
224.79	0.345624	224.79	0.208278
224.99	0.347217	224.99	0.20959
225.19	0.345277	225.19	0.205818
225.39	0.345826	225.39	0.204046
225.6	0.349159	225.6	0.208559
225.79	0.344841	225.79	0.211932
225.99	0.344801	225.99	0.21201
226.19	0.347056	226.19	0.213842
226.39	0.349405	226.39	0.209634
226.6	0.345288	226.6	0.210687
226.79	0.348622	226.79	0.204822
226.99	0.351028	226.99	0.209033
227.19	0.347466	227.19	0.212949
227.39	0.351801	227.39	0.214346
227.6	0.352407	227.6	0.213299
227.79	0.35207	227.79	0.213356
227.99	0.351428	227.99	0.216302
228.19	0.348503	228.19	0.212204
228.39	0.352215	228.39	0.214285
228.6	0.350525	228.6	0.216349
228.79	0.352378	228.79	0.215294
229	0.353566	229	0.215611
229.19	0.356952	229.19	0.213317
229.39	0.353448	229.39	0.215278
229.6	0.354259	229.6	0.21583
229.79	0.353734	229.79	0.218409
229.99	0.349913	229.99	0.218394
230.19	0.352508	230.19	0.219709
230.39	0.359352	230.39	0.220301
230.6	0.356926	230.6	0.222439
230.79	0.357131	230.79	0.22187
230.99	0.357865	230.99	0.22008
231.19	0.361885	231.19	0.217269
231.39	0.360005	231.39	0.222083
231.59	0.360657	231.59	0.222867
231.79	0.359655	231.79	0.21698
231.99	0.360269	231.99	0.225414
232.19	0.35957	232.19	0.222572
232.39	0.361513	232.39	0.223916
232.6	0.363409	232.6	0.226097
232.79	0.360607	232.79	0.219969
232.99	0.360648	232.99	0.222833
233.19	0.363336	233.19	0.224976
233.39	0.360714	233.39	0.223701
233.6	0.365253	233.6	0.225003
233.79	0.364868	233.79	0.228978
233.99	0.366015	233.99	0.22725
234.19	0.359703	234.19	0.232201
234.39	0.364955	234.39	0.229528
234.6	0.364566	234.6	0.228529
234.79	0.366601	234.79	0.228886
234.99	0.366729	234.99	0.233949
235.19	0.366986	235.19	0.226574
235.39	0.361516	235.39	0.229712
235.6	0.365062	235.6	0.228458
235.79	0.366935	235.79	0.229346
235.99	0.370261	235.99	0.233017
236.19	0.363518	236.19	0.23477
236.39	0.371516	236.39	0.23367
236.59	0.372249	236.59	0.233223
236.79	0.374165	236.79	0.238651
236.99	0.367197	236.99	0.233614
237.19	0.37009	237.19	0.237293
237.39	0.36834	237.39	0.237285
237.59	0.371822	237.59	0.234527
237.79	0.374506	237.79	0.235982
237.99	0.36913	237.99	0.23482
238.19	0.376773	238.19	0.240143
238.39	0.373482	238.39	0.235154
238.6	0.369317	238.6	0.230926
238.79	0.376108	238.79	0.237941
238.99	0.373555	238.99	0.240094
239.19	0.375162	239.19	0.238645
239.39	0.374704	239.39	0.241169
239.59	0.374118	239.59	0.240021
239.79	0.374727	239.79	0.243088
239.99	0.378409	239.99	0.240148
240.19	0.377261	240.19	0.238825
240.39	0.372624	240.39	0.242404
240.59	0.379668	240.59	0.23696
240.79	0.37938	240.79	0.243377
240.99	0.380743	240.99	0.239576
241.19	0.376032	241.19	0.240878
241.39	0.376549	241.39	0.242767
241.59	0.380843	241.59	0.244198
241.79	0.382898	241.79	0.242765
241.99	0.380438	241.99	0.242341
242.19	0.380742	242.19	0.247871
242.39	0.384136	242.39	0.242271
242.59	0.380087	242.59	0.249405
242.79	0.381545	242.79	0.24882
242.99	0.385279	242.99	0.250214
243.19	0.383225	243.19	0.251013
243.39	0.383861	243.39	0.249387
243.59	0.387534	243.59	0.248105
243.79	0.387272	243.79	0.245088
243.99	0.388847	243.99	0.246589
244.19	0.385095	244.19	0.250964
244.39	0.38662	244.39	0.254492
244.59	0.394312	244.59	0.247456
244.79	0.389674	244.79	0.248406
244.99	0.387486	244.99	0.251881
245.19	0.393074	245.19	0.255029
245.39	0.388434	245.39	0.248796
245.6	0.388673	245.6	0.2503
245.79	0.392188	245.79	0.253169
245.99	0.38978	245.99	0.256009
246.19	0.390424	246.19	0.251825
246.39	0.391921	246.39	0.254693
246.6	0.39132	246.6	0.255134
246.79	0.395295	246.79	0.259185
246.99	0.393363	246.99	0.252122
247.19	0.393564	247.19	0.254945
247.39	0.400861	247.39	0.261126
247.6	0.394355	247.6	0.258696
247.79	0.39604	247.79	0.256985
247.99	0.39648	247.99	0.259737
248.19	0.395398	248.19	0.257723
248.39	0.397853	248.39	0.259337
248.6	0.396641	248.6	0.258909
248.79	0.398639	248.79	0.261777
248.99	0.401581	248.99	0.259276
249.19	0.397133	249.19	0.260538
249.39	0.397702	249.39	0.261042
249.6	0.398979	249.6	0.259407
249.79	0.402693	249.79	0.260598
249.99	0.403006	249.99	0.263276
250.19	0.400432	250.19	0.263377
250.39	0.397874	250.39	0.263193
250.6	0.398186	250.6	0.269205
250.79	0.402838	250.79	0.261121
250.99	0.402181	250.99	0.26555
251.19	0.402901	251.19	0.266251
251.39	0.407368	251.39	0.268431
251.6	0.404808	251.6	0.264067
251.79	0.406076	251.79	0.268732
251.99	0.407806	251.99	0.269047
252.19	0.404733	252.19	0.272025
252.39	0.406809	252.39	0.270402
252.6	0.406577	252.6	0.268686
252.79	0.409313	252.79	0.267069
252.99	0.407742	252.99	0.272522
253.19	0.403936	253.19	0.268007
253.39	0.406708	253.39	0.27077
253.59	0.408763	253.59	0.268082
253.79	0.407225	253.79	0.272543
253.99	0.407327	253.99	0.270221
254.19	0.408401	254.19	0.268264
254.39	0.411814	254.39	0.274428
254.6	0.410055	254.6	0.274674
254.79	0.407904	254.79	0.27678
254.99	0.409874	254.99	0.274826
255.19	0.413892	255.19	0.275452
255.39	0.410742	255.39	0.272717
255.6	0.412317	255.6	0.27238
255.79	0.416727	255.79	0.276659
255.99	0.413856	255.99	0.277549
256.2	0.412721	256.2	0.277987
256.39	0.412313	256.39	0.282614
256.59	0.412382	256.59	0.279715
256.79	0.412676	256.79	0.278195
256.99	0.418319	256.99	0.281443
257.19	0.418929	257.19	0.279078
257.39	0.415819	257.39	0.282147
257.59	0.417217	257.59	0.280299
257.79	0.412165	257.79	0.280982
257.99	0.417458	257.99	0.283987
258.19	0.417754	258.19	0.278794
258.39	0.419071	258.39	0.281439
258.59	0.419381	258.59	0.282302
258.79	0.421848	258.79	0.284082
258.99	0.418438	258.99	0.285023
259.2	0.416486	259.2	0.282934
259.39	0.422229	259.39	0.282849
259.6	0.420106	259.6	0.284012
259.79	0.417407	259.79	0.281345
259.99	0.425313	259.99	0.286888
260.2	0.426086	260.2	0.2858
260.39	0.424319	260.39	0.289283
260.59	0.423315	260.59	0.287234
260.79	0.426952	260.79	0.292182
260.99	0.423704	260.99	0.291248
261.2	0.426779	261.2	0.29018
261.39	0.424647	261.39	0.288982
261.59	0.424254	261.59	0.289866
261.79	0.42656	261.79	0.291826
261.99	0.426412	261.99	0.289339
262.19	0.425214	262.19	0.289942
262.39	0.429536	262.39	0.286272
262.59	0.42923	262.59	0.296523
262.79	0.428067	262.79	0.293511
262.99	0.430138	262.99	0.291518
263.19	0.426698	263.19	0.290053
263.39	0.429906	263.39	0.2922
263.59	0.430719	263.59	0.29264
263.79	0.430846	263.79	0.29758
263.99	0.432966	263.99	0.297331
264.19	0.431771	264.19	0.294606
264.39	0.434067	264.39	0.299949
264.6	0.43077	264.6	0.29499
264.79	0.430412	264.79	0.298907
264.99	0.437197	264.99	0.297521
265.2	0.434975	265.2	0.299106
265.39	0.434078	265.39	0.29951
265.6	0.436686	265.6	0.297968
265.79	0.441251	265.79	0.303503
265.99	0.437008	265.99	0.30188
266.2	0.436532	266.2	0.299853
266.39	0.43725	266.39	0.300796
266.6	0.4391	266.6	0.302544
266.79	0.437027	266.79	0.305085
266.99	0.439701	266.99	0.301505
267.2	0.440104	267.2	0.302999
267.39	0.440379	267.39	0.301392
267.6	0.445605	267.6	0.303758
267.79	0.440697	267.79	0.303327
267.99	0.447159	267.99	0.30476
268.2	0.441784	268.2	0.307571
268.39	0.443456	268.39	0.3078
268.6	0.443369	268.6	0.306015
268.79	0.446503	268.79	0.305758
268.99	0.444327	268.99	0.311849
269.19	0.443936	269.19	0.306566
269.39	0.444774	269.39	0.312038
269.59	0.447748	269.59	0.307764
269.79	0.443843	269.79	0.308265
269.99	0.444123	269.99	0.311514
270.2	0.443717	270.2	0.309389
270.39	0.444271	270.39	0.308413
270.59	0.45018	270.59	0.31098
270.79	0.453474	270.79	0.312609
270.99	0.452347	270.99	0.313046
271.2	0.446551	271.2	0.309188
271.39	0.449715	271.39	0.312858
271.6	0.445027	271.6	0.310728
271.79	0.449639	271.79	0.315316
271.99	0.446854	271.99	0.312594
272.2	0.452434	272.2	0.317249
272.39	0.452963	272.39	0.31543
272.6	0.455332	272.6	0.315174
272.79	0.454412	272.79	0.317138
272.99	0.459024	272.99	0.320597
273.2	0.452716	273.2	0.31745
273.39	0.453553	273.39	0.317943
273.6	0.450262	273.6	0.32414
273.79	0.450122	273.79	0.318482
273.99	0.455386	273.99	0.318478
274.19	0.453186	274.19	0.322471
274.39	0.457324	274.39	0.316878
274.6	0.452795	274.6	0.321947
274.79	0.456303	274.79	0.32123
274.99	0.455781	274.99	0.321843
275.2	0.458125	275.2	0.324721
275.39	0.460148	275.39	0.3295
275.59	0.45965	275.59	0.319252
275.79	0.463404	275.79	0.320024
275.99	0.457486	275.99	0.324104
276.2	0.459831	276.2	0.32963
276.39	0.460742	276.39	0.327773
276.6	0.458502	276.6	0.329767
276.79	0.460636	276.79	0.329302
276.99	0.460008	276.99	0.328251
277.19	0.463569	277.19	0.328999
277.39	0.466593	277.39	0.330532
277.59	0.46524	277.59	0.330793
277.79	0.45915	277.79	0.330183
277.99	0.467233	277.99	0.334066
278.19	0.467719	278.19	0.330933
278.39	0.464517	278.39	0.331846
278.59	0.467281	278.59	0.333118
278.79	0.467319	278.79	0.328367
278.99	0.463504	278.99	0.331051
279.19	0.466926	279.19	0.330151
279.39	0.460489	279.39	0.334765
279.59	0.46722	279.59	0.331047
279.79	0.466608	279.79	0.333477
279.99	0.472056	279.99	0.335492
280.19	0.475371	280.19	0.336159
280.39	0.474027	280.39	0.334764
280.59	0.47232	280.59	0.336779
280.79	0.471066	280.79	0.337868
280.99	0.474166	280.99	0.338542
281.2	0.470927	281.2	0.337295
281.39	0.475615	281.39	0.338417
281.59	0.473455	281.59	0.335504
281.79	0.472773	281.79	0.340012
281.99	0.475038	281.99	0.338959
282.19	0.474118	282.19	0.339922
282.39	0.473219	282.39	0.341678
282.59	0.472934	282.59	0.346963
282.79	0.482314	282.79	0.340799
282.99	0.479262	282.99	0.342477
283.2	0.474074	283.2	0.344713
283.39	0.478449	283.39	0.343151
283.6	0.477209	283.6	0.342827
283.79	0.479939	283.79	0.344147
283.99	0.478053	283.99	0.342927
284.2	0.477998	284.2	0.343549
284.39	0.481611	284.39	0.344074
284.6	0.481934	284.6	0.352783
284.79	0.483029	284.79	0.346608
284.99	0.484767	284.99	0.34883
285.2	0.480997	285.2	0.348458
285.39	0.484815	285.39	0.34671
285.6	0.483261	285.6	0.347999
285.79	0.484513	285.79	0.348523
285.99	0.484243	285.99	0.35078
286.19	0.48344	286.19	0.352373
286.39	0.483223	286.39	0.353501
286.59	0.480834	286.59	0.349615
286.79	0.485825	286.79	0.352784
286.99	0.488779	286.99	0.352148
287.2	0.487112	287.2	0.35041
287.39	0.4897	287.39	0.354419
287.6	0.485314	287.6	0.353073
287.79	0.492941	287.79	0.352433
288	0.486917	288	0.352962
288.2	0.488891	288.2	0.358476
288.39	0.487188	288.39	0.354785
288.6	0.487329	288.6	0.355178
288.79	0.489628	288.79	0.355591
288.99	0.492723	288.99	0.360918
289.2	0.491636	289.2	0.356446
289.39	0.492858	289.39	0.360595
289.6	0.493724	289.6	0.357089
289.79	0.491815	289.79	0.360285
289.99	0.488725	289.99	0.359795
290.2	0.494808	290.2	0.358538
290.39	0.493308	290.39	0.362648
290.6	0.49863	290.6	0.367196
290.79	0.500771	290.79	0.361657
290.99	0.498261	290.99	0.363255
291.19	0.493052	291.19	0.363797
291.39	0.499732	291.39	0.363172
291.59	0.496546	291.59	0.367948
291.79	0.503866	291.79	0.366468
291.99	0.501962	291.99	0.371715
292.2	0.500838	292.2	0.367868
292.39	0.49992	292.39	0.365507
292.59	0.500299	292.59	0.367385
292.79	0.497816	292.79	0.372053
292.99	0.500062	292.99	0.369752
293.2	0.503102	293.2	0.367554
293.39	0.499624	293.39	0.368787
293.6	0.499327	293.6	0.371332
293.79	0.505854	293.79	0.373874
293.99	0.506088	293.99	0.370451
294.2	0.504627	294.2	0.369051
294.39	0.507735	294.39	0.368261
294.6	0.506445	294.6	0.370759
294.79	0.501462	294.79	0.37249
294.99	0.506846	294.99	0.371584
295.2	0.508456	295.2	0.372596
295.39	0.509306	295.39	0.371575
295.59	0.505651	295.59	0.378147
295.79	0.505287	295.79	0.372044
295.99	0.510114	295.99	0.376966
296.19	0.508171	296.19	0.374433
296.39	0.510572	296.39	0.379903
296.59	0.513777	296.59	0.37501
296.79	0.510773	296.79	0.379408
296.99	0.51255	296.99	0.380209
297.19	0.508952	297.19	0.381
297.39	0.514614	297.39	0.379531
297.59	0.512669	297.59	0.378024
297.79	0.509948	297.79	0.380757
297.99	0.512115	297.99	0.381935
298.2	0.508923	298.2	0.384141
298.39	0.51582	298.39	0.379154
298.6	0.509941	298.6	0.382118
298.79	0.511318	298.79	0.382864
298.99	0.516913	298.99	0.385819
299.19	0.512706	299.19	0.382258
299.39	0.51728	299.39	0.382483
299.6	0.516937	299.6	0.385509
299.79	0.519954	299.79	0.385564
299.99	0.519174	299.99	0.383252
300.19	0.519257	300.19	0.388813
300.39	0.516301	300.39	0.388222
300.59	0.518112	300.59	0.387275
300.79	0.520569	300.79	0.388334
300.99	0.523147	300.99	0.384802
301.19	0.518178	301.19	0.388416
301.39	0.52474	301.39	0.386703
301.59	0.524291	301.59	0.38849
301.79	0.521657	301.79	0.391678
301.99	0.523575	301.99	0.392486
302.19	0.524649	302.19	0.390041
302.39	0.527872	302.39	0.392086
302.59	0.521357	302.59	0.392399
302.79	0.525024	302.79	0.39042
302.99	0.525119	302.99	0.390943
303.19	0.526224	303.19	0.393313
303.39	0.528092	303.39	0.393945
303.59	0.530703	303.59	0.396311
303.79	0.52488	303.79	0.39494
303.99	0.528428	303.99	0.391418
304.2	0.528708	304.2	0.396021
304.39	0.528454	304.39	0.398689
304.6	0.534425	304.6	0.392653
304.79	0.531406	304.79	0.398449
304.99	0.529939	304.99	0.402528
305.2	0.534173	305.2	0.397418
305.39	0.530247	305.39	0.398259
305.6	0.531686	305.6	0.40262
305.79	0.533508	305.79	0.403995
305.99	0.530397	305.99	0.401936
306.2	0.535428	306.2	0.400262
306.39	0.534597	306.39	0.405013
306.6	0.535963	306.6	0.402227
306.79	0.536531	306.79	0.408501
306.99	0.535325	306.99	0.406732
307.2	0.537149	307.2	0.403149
307.39	0.539564	307.39	0.401859
307.6	0.536384	307.6	0.405566
307.79	0.538051	307.79	0.40629
307.99	0.541948	307.99	0.404436
308.19	0.536906	308.19	0.413275
308.39	0.537843	308.39	0.4074
308.6	0.533953	308.6	0.407827
308.79	0.538962	308.79	0.406084
308.99	0.537904	308.99	0.408769
309.19	0.539563	309.19	0.40703
309.39	0.540876	309.39	0.412401
309.59	0.5404	309.59	0.410568
309.79	0.544452	309.79	0.406805
309.99	0.543911	309.99	0.410613
310.2	0.547882	310.2	0.415394
310.4	0.54206	310.4	0.414662
310.6	0.547805	310.6	0.413192
310.79	0.545673	310.79	0.410894
310.99	0.549424	310.99	0.416141
311.2	0.547306	311.2	0.413965
311.39	0.550531	311.39	0.413075
311.6	0.550861	311.6	0.41193
311.79	0.548404	311.79	0.415237
311.99	0.545173	311.99	0.41765
312.19	0.549387	312.19	0.418767
312.39	0.549014	312.39	0.416005
312.6	0.547744	312.6	0.414875
312.79	0.547367	312.79	0.421567
312.99	0.550624	312.99	0.421844
313.2	0.548846	313.2	0.422522
313.39	0.554071	313.39	0.420588
313.59	0.553153	313.59	0.422683
313.79	0.553375	313.79	0.418584
313.99	0.555936	313.99	0.422278
314.19	0.553535	314.19	0.421609
314.39	0.558221	314.39	0.424072
314.59	0.560194	314.59	0.424414
314.79	0.549502	314.79	0.422883
314.99	0.555939	314.99	0.42258
315.19	0.558782	315.19	0.427304
315.39	0.556629	315.39	0.424904
315.6	0.560708	315.6	0.4245
315.79	0.558638	315.79	0.425465
315.99	0.55958	315.99	0.426408
316.2	0.558401	316.2	0.43187
316.39	0.558488	316.39	0.423704
316.6	0.563729	316.6	0.427324
316.79	0.562967	316.79	0.425156
316.99	0.563546	316.99	0.427978
317.19	0.559121	317.19	0.431008
317.39	0.562809	317.39	0.428213
317.59	0.562022	317.59	0.436091
317.79	0.562212	317.79	0.431106
317.99	0.564624	317.99	0.434404
318.19	0.564021	318.19	0.431675
318.39	0.566077	318.39	0.43566
318.59	0.565551	318.59	0.433524
318.79	0.569641	318.79	0.432013
318.99	0.5667	318.99	0.434909
319.19	0.56387	319.19	0.43199
319.39	0.561902	319.39	0.435619
319.59	0.568693	319.59	0.439144
319.79	0.566913	319.79	0.434378
319.99	0.571234	319.99	0.434702
320.19	0.568043	320.19	0.441116
320.39	0.565732	320.39	0.441331
320.59	0.572506	320.59	0.438423
320.79	0.572283	320.79	0.443338
320.99	0.572137	320.99	0.435927
321.19	0.57053	321.19	0.437699
321.39	0.572873	321.39	0.442937
321.59	0.574873	321.59	0.442213
321.79	0.573108	321.79	0.445037
321.99	0.576608	321.99	0.440779
322.19	0.572303	322.19	0.444586
322.39	0.573875	322.39	0.440249
322.59	0.572964	322.59	0.44636
322.79	0.580467	322.79	0.44584
322.99	0.570812	322.99	0.443186
323.2	0.577659	323.2	0.451443
323.39	0.577391	323.39	0.445657
323.6	0.579196	323.6	0.447642
323.79	0.58104	323.79	0.450817
323.99	0.57747	323.99	0.447626
324.2	0.580052	324.2	0.44395
324.39	0.580891	324.39	0.449599
324.6	0.580981	324.6	0.451
324.79	0.580984	324.79	0.450404
324.99	0.58045	324.99	0.449038
325.2	0.581315	325.2	0.450734
325.39	0.584588	325.39	0.454325
325.59	0.588134	325.59	0.452335
325.79	0.585267	325.79	0.452692
325.99	0.58775	325.99	0.454539
326.2	0.587303	326.2	0.454643
326.39	0.586219	326.39	0.453427
326.6	0.583501	326.6	0.451835
326.79	0.58412	326.79	0.457347
326.99	0.584215	326.99	0.452985
327.2	0.579868	327.2	0.458162
327.39	0.588571	327.39	0.456252
327.6	0.587333	327.6	0.45874
327.79	0.588966	327.79	0.453068
327.99	0.590404	327.99	0.456892
328.2	0.590431	328.2	0.457839
328.39	0.592593	328.39	0.460034
328.6	0.584817	328.6	0.462176
328.79	0.588055	328.79	0.462366
328.99	0.589861	328.99	0.461737
329.19	0.593481	329.19	0.460187
329.39	0.593254	329.39	0.462972
329.6	0.587947	329.6	0.461236
329.79	0.592577	329.79	0.467425
329.99	0.59086	329.99	0.462481
330.19	0.591738	330.19	0.46445
330.39	0.593156	330.39	0.469422
330.6	0.595805	330.6	0.464808
330.79	0.597599	330.79	0.469464
330.99	0.602545	330.99	0.466645
331.19	0.59865	331.19	0.46964
331.39	0.596374	331.39	0.46918
331.59	0.596127	331.59	0.466433
331.79	0.600334	331.79	0.467842
331.99	0.600851	331.99	0.46787
332.2	0.600186	332.2	0.468009
332.39	0.598182	332.39	0.470406
332.6	0.601738	332.6	0.46764
332.79	0.607379	332.79	0.473291
332.99	0.60138	332.99	0.473157
333.2	0.602151	333.2	0.470946
333.39	0.602529	333.39	0.474645
333.6	0.604203	333.6	0.473442
333.79	0.602664	333.79	0.470282
333.99	0.601653	333.99	0.47178
334.2	0.602925	334.2	0.479411
334.39	0.606543	334.39	0.471677
334.6	0.604175	334.6	0.478428
334.79	0.603441	334.79	0.476424
334.99	0.608976	334.99	0.479958
335.19	0.605062	335.19	0.476135
335.39	0.60662	335.39	0.481258
335.59	0.607037	335.59	0.475224
335.79	0.605153	335.79	0.48371
335.99	0.608392	335.99	0.482867
336.19	0.607149	336.19	0.479402
336.39	0.608245	336.39	0.482256
336.59	0.613264	336.59	0.480412
336.79	0.610031	336.79	0.480077
336.99	0.61097	336.99	0.483696
337.2	0.608128	337.2	0.485192
337.39	0.610221	337.39	0.490269
337.6	0.617366	337.6	0.484528
337.79	0.614117	337.79	0.486458
337.99	0.60857	337.99	0.489936
338.19	0.610375	338.19	0.483291
338.39	0.615178	338.39	0.490588
338.6	0.609927	338.6	0.484502
338.79	0.61404	338.79	0.487905
338.99	0.620125	338.99	0.48824
339.19	0.614171	339.19	0.485971
339.39	0.619978	339.39	0.493111
339.6	0.618565	339.6	0.488896
339.79	0.618379	339.79	0.48945
339.99	0.618915	339.99	0.488582
340.19	0.615999	340.19	0.48942
340.39	0.619398	340.39	0.491485
340.59	0.621159	340.59	0.492132
340.79	0.623928	340.79	0.497335
340.99	0.618604	340.99	0.493743
341.19	0.620397	341.19	0.497142
341.39	0.625247	341.39	0.496098
341.6	0.623943	341.6	0.495101
341.79	0.617249	341.79	0.495119
341.99	0.625745	341.99	0.497797
342.19	0.62214	342.19	0.500181
342.39	0.623201	342.39	0.499045
342.59	0.630851	342.59	0.498227
342.79	0.629426	342.79	0.503715
342.99	0.627102	342.99	0.497992
343.2	0.630425	343.2	0.498785
343.39	0.629295	343.39	0.50058
343.6	0.628129	343.6	0.501926
343.79	0.629096	343.79	0.500984
343.99	0.627666	343.99	0.50204
344.2	0.628614	344.2	0.503422
344.39	0.62729	344.39	0.503544
344.6	0.631853	344.6	0.504265
344.79	0.632613	344.79	0.510095
344.99	0.632573	344.99	0.503931
345.2	0.633566	345.2	0.505862
345.39	0.635767	345.39	0.506096
345.6	0.630417	345.6	0.507145
345.79	0.630786	345.79	0.510147
345.99	0.633929	345.99	0.506164
346.2	0.636474	346.2	0.510773
346.39	0.634255	346.39	0.504869
346.6	0.635394	346.6	0.509636
346.79	0.637285	346.79	0.508875
346.99	0.637208	346.99	0.510838
347.19	0.639409	347.19	0.510671
347.39	0.635325	347.39	0.511297
347.6	0.640109	347.6	0.514741
347.79	0.63675	347.79	0.51579
347.99	0.641364	347.99	0.512108
348.2	0.640364	348.2	0.509485
348.39	0.64307	348.39	0.512936
348.59	0.643887	348.59	0.516209
348.79	0.644617	348.79	0.518435
348.99	0.64431	348.99	0.514331
349.19	0.648122	349.19	0.520162
349.39	0.644706	349.39	0.516109
349.6	0.64226	349.6	0.515825
349.79	0.644926	349.79	0.517187
349.99	0.642143	349.99	0.517453
350.2	0.646088	350.2	0.518523
350.39	0.644478	350.39	0.521339
350.6	0.646606	350.6	0.524409
350.79	0.645924	350.79	0.520455
350.99	0.646421	350.99	0.520889
351.2	0.647048	351.2	0.524922
351.39	0.649166	351.39	0.525222
351.6	0.649607	351.6	0.523973
351.79	0.650065	351.79	0.522475
351.99	0.648281	351.99	0.521308
352.19	0.653995	352.19	0.523018
352.39	0.648595	352.39	0.52859
352.59	0.653905	352.59	0.52322
352.79	0.65226	352.79	0.527144
352.99	0.649766	352.99	0.528113
353.2	0.649949	353.2	0.52659
353.39	0.650999	353.39	0.532032
353.59	0.657303	353.59	0.528655
353.79	0.652585	353.79	0.53124
353.99	0.65591	353.99	0.534129
354.2	0.65829	354.2	0.529457
354.39	0.655574	354.39	0.534729
354.6	0.656168	354.6	0.531979
354.79	0.655404	354.79	0.533235
354.99	0.654955	354.99	0.532375
355.2	0.658268	355.2	0.53598
355.39	0.653421	355.39	0.534119
355.6	0.659903	355.6	0.535781
355.79	0.660766	355.79	0.533924
355.99	0.665337	355.99	0.538962
356.19	0.656915	356.19	0.535262
356.39	0.661963	356.39	0.531128
356.6	0.663313	356.6	0.53704
356.79	0.662912	356.79	0.528544
356.99	0.660143	356.99	0.538216
357.19	0.664365	357.19	0.537898
357.39	0.663589	357.39	0.53843
357.59	0.663641	357.59	0.537434
357.79	0.660224	357.79	0.541301
357.99	0.666315	357.99	0.53886
358.19	0.668235	358.19	0.543165
358.39	0.666187	358.39	0.53954
358.59	0.665864	358.59	0.541763
358.79	0.664721	358.79	0.547707
358.99	0.665344	358.99	0.542785
359.19	0.665204	359.19	0.544457
359.39	0.670944	359.39	0.541197
359.6	0.670078	359.6	0.544164
359.79	0.667871	359.79	0.542708
359.99	0.672702	359.99	0.548315
360.19	0.670601	360.19	0.548164
360.39	0.672363	360.39	0.547913
360.59	0.675416	360.59	0.54964
360.79	0.672782	360.79	0.5467
360.99	0.674629	360.99	0.549662
361.19	0.672604	361.19	0.548662
361.39	0.672488	361.39	0.548849
361.59	0.674804	361.59	0.550407
361.79	0.676758	361.79	0.545769
361.99	0.67329	361.99	0.549685
362.19	0.677493	362.19	0.550883
362.39	0.676674	362.39	0.550026
362.6	0.679174	362.6	0.551542
362.79	0.679182	362.79	0.555845
362.99	0.676972	362.99	0.551902
363.2	0.68121	363.2	0.551661
363.39	0.683403	363.39	0.551139
363.6	0.676701	363.6	0.555569
363.79	0.676764	363.79	0.551463
363.99	0.680943	363.99	0.55723
364.19	0.680826	364.19	0.561073
364.39	0.68179	364.39	0.555806
364.6	0.679012	364.6	0.556964
364.79	0.685243	364.79	0.558514	wash in reaction buffer
364.99	0.681999	364.99	0.560979
365.2	0.686008	365.2	0.561375
365.39	0.684628	365.39	0.560558
365.59	0.67957	365.59	0.562263
365.79	0.693393	365.79	0.560357
365.99	0.68577	365.99	0.56285
366.2	0.688895	366.2	0.563133
366.39	0.690823	366.39	0.564294
366.6	0.68605	366.6	0.560754
366.79	0.689731	366.79	0.563624
366.99	0.68733	366.99	0.568418
367.2	0.688817	367.2	0.564319
367.39	0.690368	367.39	0.572709
367.6	0.685407	367.6	0.566947
367.79	0.689351	367.79	0.568242
367.99	0.68542	367.99	0.569158
368.19	0.682097	368.19	0.565232
368.39	0.691862	368.39	0.569826
368.6	0.69011	368.6	0.566889
368.79	0.6925	368.79	0.574593
368.99	0.697145	368.99	0.573006
369.19	0.698804	369.19	0.573961
369.39	0.695727	369.39	0.569437
369.59	0.695917	369.59	0.571737
369.79	0.694585	369.79	0.570315
369.99	0.699695	369.99	0.57426
370.2	0.69364	370.2	0.573563
370.39	0.700004	370.39	0.573049
370.59	0.698113	370.59	0.578156
370.79	0.698694	370.79	0.576922
370.99	0.699035	370.99	0.573015
371.2	0.697315	371.2	0.573992
371.39	0.699736	371.39	0.578982
371.59	0.70003	371.59	0.582898
371.79	0.70173	371.79	0.581891
371.99	0.696779	371.99	0.583159
372.2	0.700766	372.2	0.584286
372.39	0.698327	372.39	0.580851
372.6	0.701391	372.6	0.580285
372.79	0.70337	372.79	0.580587
372.99	0.69956	372.99	0.581264
373.19	0.703542	373.19	0.579892
373.39	0.699645	373.39	0.586618
373.59	0.706088	373.59	0.583008
373.79	0.705814	373.79	0.587224
373.99	0.705456	373.99	0.588168
374.2	0.70078	374.2	0.586669
374.39	0.711893	374.39	0.589943
374.59	0.708709	374.59	0.585481
374.79	0.705988	374.79	0.587914
374.99	0.705155	374.99	0.590905
375.19	0.711806	375.19	0.586395
375.4	0.522603	375.4	0.498996
375.59	0.479221	375.59	0.483661
375.79	0.456008	375.79	0.475718
375.99	0.441303	375.99	0.471948
376.19	0.432613	376.19	0.46723
376.39	0.434804	376.39	0.467458
376.59	0.430098	376.59	0.471322
376.79	0.430407	376.79	0.468099
376.99	0.428038	376.99	0.462202
377.19	0.425346	377.19	0.467528
377.39	0.429481	377.39	0.467628
377.59	0.429675	377.59	0.463853
377.79	0.428902	377.79	0.468929
377.99	0.42641	377.99	0.469713
378.19	0.425687	378.19	0.470207
378.39	0.429414	378.39	0.46776
378.59	0.429812	378.59	0.466538
378.79	0.425726	378.79	0.46808
378.99	0.425013	378.99	0.470713
379.19	0.425056	379.19	0.466635
379.39	0.429039	379.39	0.46984
379.59	0.433368	379.59	0.472385
379.79	0.42616	379.79	0.471445
379.99	0.428474	379.99	0.470191
380.19	0.432926	380.19	0.467444
380.39	0.427259	380.39	0.468614
380.59	0.429039	380.59	0.469089
380.79	0.432129	380.79	0.46463
380.99	0.43076	380.99	0.46849
381.19	0.42787	381.19	0.466533
381.39	0.432122	381.39	0.471144
381.59	0.43141	381.59	0.470392
381.79	0.426522	381.79	0.471804
381.99	0.429495	381.99	0.471502
382.19	0.427255	382.19	0.468191
382.39	0.432156	382.39	0.467439
382.59	0.429071	382.59	0.469768
382.79	0.426197	382.79	0.468232
382.99	0.429858	382.99	0.466724
383.19	0.430814	383.19	0.466754
383.39	0.42972	383.39	0.472131
383.59	0.428829	383.59	0.467718
383.79	0.430351	383.79	0.469672
383.99	0.431659	383.99	0.466329
384.19	0.432145	384.19	0.473538
384.39	0.432505	384.39	0.470019
384.59	0.429461	384.59	0.470832
384.79	0.430287	384.79	0.467811
384.99	0.428157	384.99	0.467907
385.19	0.429505	385.19	0.470328
385.39	0.433129	385.39	0.467996
385.59	0.432163	385.59	0.466519
385.79	0.428657	385.79	0.468387
385.99	0.436547	385.99	0.469593
386.19	0.430641	386.19	0.469295
386.39	0.428771	386.39	0.464636
386.59	0.429701	386.59	0.469991
386.79	0.429978	386.79	0.469747
386.99	0.428395	386.99	0.469995
387.19	0.430514	387.19	0.470545
387.39	0.433044	387.39	0.471951
387.59	0.435082	387.59	0.4702
387.79	0.430328	387.79	0.470177
387.99	0.435301	387.99	0.470549
388.19	0.43255	388.19	0.466823
388.39	0.431579	388.39	0.468222
388.59	0.430926	388.59	0.47275
388.79	0.430753	388.79	0.470432
388.99	0.431715	388.99	0.46895
389.19	0.43332	389.19	0.469339
389.39	0.428735	389.39	0.470605
389.59	0.430747	389.59	0.467568
389.79	0.433251	389.79	0.468727
389.99	0.42972	389.99	0.469374
390.19	0.434141	390.19	0.469621
390.39	0.431975	390.39	0.469358
390.59	0.431691	390.59	0.470052
390.79	0.432922	390.79	0.471682
390.99	0.434147	390.99	0.471282
391.19	0.431778	391.19	0.471152
391.39	0.431	391.39	0.468425
391.59	0.435863	391.59	0.471847
391.79	0.433903	391.79	0.47229
391.99	0.434172	391.99	0.472348
392.19	0.43525	392.19	0.471912
392.39	0.429833	392.39	0.469241
392.59	0.428874	392.59	0.472672
392.79	0.432035	392.79	0.470203
392.99	0.436709	392.99	0.469191
393.19	0.433329	393.19	0.470217
393.39	0.438301	393.39	0.471154
393.59	0.432507	393.59	0.468731
393.79	0.43705	393.79	0.469282
393.99	0.43681	393.99	0.471019
394.19	0.434186	394.19	0.473197
394.39	0.437413	394.39	0.470843
394.59	0.434361	394.59	0.472326
394.79	0.436275	394.79	0.474097
394.99	0.430823	394.99	0.470017
395.19	0.436447	395.19	0.465821
395.39	0.434875	395.39	0.468291
395.59	0.432415	395.59	0.472421
395.79	0.43282	395.79	0.474268
395.99	0.435306	395.99	0.473759
396.19	0.433936	396.19	0.47057
396.39	0.433706	396.39	0.47228
396.59	0.431712	396.59	0.469127
396.79	0.432934	396.79	0.471829
396.99	0.432812	396.99	0.468315
397.19	0.437501	397.19	0.467598
397.39	0.437306	397.39	0.468225
397.59	0.439216	397.59	0.471117
397.79	0.435117	397.79	0.471556
397.99	0.437857	397.99	0.469142
398.19	0.433188	398.19	0.474078
398.39	0.432364	398.39	0.467365
398.59	0.436188	398.59	0.468244
398.79	0.434736	398.79	0.473414
398.99	0.432991	398.99	0.4719
[truncated: 24,500 more rows]

## Sheet: rep3
2019-08-01
raw data
empty tip		J-IRE1 P108A		J-IRE1 Q105C ox.
Time (s)	Displacement	Time (s)	Displacement	Time (s)	Displacement
0	0	0	0	0	0	equilibrate in reaction buffer
0.2	0.00287217	0.2	-7.176e-05	0.2	0.0007658
0.4	0.0118147	0.4	0.0016851	0.4	-0.00300742
0.6	0.0237126	0.6	0.00013844	0.6	-0.00126649
0.8	0.0341195	0.8	0.00074206	0.8	-7.84e-05
1	0.0421006	1	-0.00022677	1	0.00066888
1.2	0.0532864	1.2	9.585e-05	1.2	0.00059541
1.39	0.0611038	1.39	0.00137954	1.39	0.00015391
1.6	0.0640887	1.6	0.00174639	1.6	6.134e-05
1.79	0.0775475	1.79	0.00358712	1.79	-0.00419964
2	0.0761332	2	0.00129158	2	0.00056908
2.19	0.0797436	2.19	-0.00038881	2.19	-0.00152064
2.39	0.086911	2.39	-0.00091986	2.39	0.00313344
2.59	0.0896557	2.59	0.00232443	2.59	-0.0014382
2.79	0.0918574	2.79	0.0016283	2.79	0.00123131
2.99	0.0943601	2.99	4.769e-05	2.99	-0.00494736
3.19	0.0971003	3.19	0.00020424	3.19	0.00529856
3.39	0.0949293	3.39	0.003956	3.39	0.00064972
3.59	0.0981723	3.59	0.00014746	3.59	-0.00155911
3.79	0.0977182	3.79	0.00286327	3.79	0.00405866
3.99	0.100948	3.99	0.00204824	3.99	0.00300708
4.19	0.100779	4.19	0.001353	4.19	-0.00203894
4.39	0.0991883	4.39	0.00116504	4.39	0.00157637
4.59	0.101125	4.59	0.00358822	4.59	0.00229349
4.8	0.101169	4.8	0.00189276	4.8	-0.00137456
4.99	0.104137	4.99	0.00038127	4.99	0.00296644
5.19	0.107494	5.19	0.00016385	5.19	-0.00148583
5.39	0.106073	5.39	0.00378286	5.39	-2.835e-05
5.59	0.107217	5.59	0.00546171	5.59	0.00068453
5.79	0.107668	5.79	0.00323359	5.79	0.00479085
5.99	0.108421	5.99	0.00048033	5.99	0.00335257
6.19	0.108785	6.19	0.0024165	6.19	0.00465652
6.39	0.112893	6.39	0.00376245	6.39	0.00147167
6.59	0.106572	6.59	0.00278741	6.59	0.00228545
6.79	0.109404	6.79	0.00484301	6.79	0.00448922
6.99	0.107719	6.99	0.0009844	6.99	0.00083369
7.19	0.108689	7.19	0.0017468	7.19	0.0001926
7.39	0.111483	7.39	0.00151334	7.39	0.00051729
7.59	0.107074	7.59	0.00275201	7.59	0.00459375
7.8	0.110016	7.8	0.00640309	7.8	0.00176588
7.99	0.107932	7.99	0.00244052	7.99	0.00516676
8.19	0.110522	8.19	0.00181035	8.19	0.0038135
8.39	0.109343	8.39	0.00020136	8.39	0.00388556
8.59	0.111756	8.59	0.00370006	8.59	0.00171689
8.8	0.111603	8.8	0.00104009	8.8	0.00158679
8.99	0.109654	8.99	0.0004683	8.99	-0.00252467
9.19	0.109685	9.19	0.00288173	9.19	0.00017898
9.39	0.109741	9.39	0.00259164	9.39	0.00464936
9.59	0.10891	9.59	0.00533916	9.59	0.00336901
9.8	0.110223	9.8	-0.00011945	9.8	0.00370435
9.99	0.10988	9.99	0.0013085	9.99	0.00212695
10.19	0.107373	10.19	4.475e-05	10.19	0.0014391
10.39	0.109587	10.39	-0.0006135	10.39	0.00271693
10.6	0.110276	10.6	0.00249343	10.6	0.00676518
10.79	0.111237	10.79	0.00316378	10.79	0.00117918
10.99	0.110312	10.99	0.0020046	10.99	0.00115644
11.19	0.10814	11.19	0.00372777	11.19	0.00523149
11.39	0.109519	11.39	0.00583293	11.39	0.0023754
11.59	0.110764	11.59	0.00329932	11.59	0.00371454
11.79	0.111811	11.79	0.00414761	11.79	0.00451699
11.99	0.108467	11.99	0.00493785	11.99	0.00603845
12.19	0.112876	12.19	0.00561664	12.19	0.0015011
12.39	0.107255	12.39	0.00069558	12.39	0.00161256
12.59	0.111414	12.59	0.00467849	12.59	0.0037657
12.8	0.1126	12.8	0.0031413	12.8	0.00458885
12.99	0.112298	12.99	0.00133571	12.99	-0.00147543
13.19	0.108161	13.19	0.00146752	13.19	0.00483525
13.39	0.107581	13.39	0.00731976	13.39	0.00337433
13.59	0.111186	13.59	0.00125006	13.59	0.00037396
13.8	0.108561	13.8	0.00098432	13.8	0.00506143
13.99	0.109091	13.99	0.00292582	13.99	0.00308242
14.19	0.108929	14.19	-0.00069178	14.19	0.00310302
14.39	0.113477	14.39	0.00423977	14.39	0.00781834
14.59	0.109928	14.59	0.00509224	14.59	0.00429797
14.79	0.113161	14.79	0.00099728	14.79	0.00270601
14.99	0.113049	14.99	0.00164238	14.99	-0.0012785
15.19	0.108237	15.19	0.00387985	15.19	0.00225404
15.39	0.112382	15.39	0.00605533	15.39	0.00423502
15.59	0.111645	15.59	0.00434749	15.59	0.00399493
15.79	0.109174	15.79	0.00481435	15.79	0.00288178
15.99	0.109923	15.99	0.00411909	15.99	0.0046935
16.19	0.113553	16.19	0.00256163	16.19	0.00381467
16.4	0.110413	16.4	0.0025748	16.4	0.00268375
16.59	0.111275	16.59	0.00336744	16.59	0.0024515
16.79	0.113797	16.79	0.00405893	16.79	0.00196032
16.99	0.114473	16.99	0.00364008	16.99	0.00024457
17.19	0.111648	17.19	0.00410406	17.19	0.00590104
17.39	0.113176	17.39	0.0042192	17.39	0.00512273
17.59	0.110386	17.59	0.0029849	17.59	0.0037021
17.79	0.111989	17.79	0.0013904	17.79	0.00552349
17.99	0.114756	17.99	0.00368938	17.99	0.00513502
18.19	0.108179	18.19	0.00378214	18.19	0.00580628
18.39	0.110794	18.39	0.0005797	18.39	0.00536348
18.59	0.110753	18.59	0.00292352	18.59	0.00467173
18.8	0.109826	18.8	0.003298	18.8	0.00676103
19	0.116762	19	0.00391564	19	0.00372176
19.2	0.1129	19.2	0.00232413	19.2	0.00495767
19.4	0.111354	19.4	0.00096525	19.4	0.00374894
19.6	0.113237	19.6	0.00127304	19.6	0.00554636
19.8	0.112269	19.8	0.00026692	19.8	0.00590759
20	0.116873	20	0.00185803	20	0.00435937
20.2	0.115043	20.2	0.00383633	20.2	0.00551515
20.4	0.110118	20.4	0.00238216	20.4	0.0062098
20.59	0.113659	20.59	0.00447233	20.59	0.00549938
20.8	0.111687	20.8	0.00504507	20.8	0.00574261
21	0.111603	21	0.00659593	21	0.00616548
21.2	0.110602	21.2	0.00294917	21.2	0.00593072
21.4	0.112897	21.4	0.00305381	21.4	0.00466898
21.6	0.115272	21.6	0.00283426	21.6	0.00787732
21.8	0.112181	21.8	0.00465209	21.8	0.00241324
21.99	0.113728	21.99	0.00509391	21.99	0.00821013
22.2	0.116047	22.2	0.00323501	22.2	0.00549183
22.4	0.112067	22.4	0.00701572	22.4	0.00701307
22.6	0.107258	22.6	0.00102924	22.6	0.00663459
22.79	0.110137	22.79	0.00364559	22.79	0.00304467
22.99	0.112473	22.99	0.00320787	22.99	0.00641568
23.2	0.108847	23.2	0.0019272	23.2	0.00943054
23.4	0.112151	23.4	0.00593393	23.4	0.00748306
23.6	0.1097	23.6	0.0017214	23.6	0.00558901
23.79	0.111777	23.79	0.00092311	23.79	0.00484373
24	0.112923	24	0.005467	24	0.00393265
24.2	0.11481	24.2	0.00261499	24.2	0.0069366
24.4	0.110713	24.4	0.00031118	24.4	0.00625597
24.59	0.111579	24.59	-0.00103254	24.59	0.00671806
24.8	0.111754	24.8	0.00182771	24.8	0.00939954
25	0.114783	25	0.00179254	25	0.0053562
25.19	0.111557	25.19	0.00193093	25.19	0.00469635
25.4	0.11621	25.4	0.00419726	25.4	0.00220528
25.59	0.115807	25.59	0.0047239	25.59	0.0039452
25.8	0.112657	25.8	0.00501139	25.8	0.00712363
26	0.11407	26	0.00453433	26	0.00185738
26.19	0.111346	26.19	0.00446246	26.19	0.00800869
26.4	0.113373	26.4	0.00473978	26.4	0.00309834
26.6	0.112035	26.6	0.00282184	26.6	0.00855933
26.8	0.114594	26.8	0.00363811	26.8	0.00418181
26.99	0.111797	26.99	0.00190406	26.99	0.0054377
27.2	0.110515	27.2	0.00362412	27.2	0.00262835
27.39	0.11479	27.39	0.00527082	27.39	0.00387583
27.6	0.11118	27.6	0.00299854	27.6	0.00587038
27.79	0.111027	27.79	0.00468406	27.79	0.00698479
27.99	0.112843	27.99	0.00123435	27.99	0.00564249
28.2	0.115285	28.2	0.00107551	28.2	0.00588178
28.4	0.113851	28.4	0.00048906	28.4	0.00427949
28.6	0.112674	28.6	0.00417502	28.6	0.00331093
28.79	0.11348	28.79	-0.00028605	28.79	0.00776522
29	0.113829	29	0.00242	29	0.00431138
29.19	0.111298	29.19	0.00367423	29.19	0.0100855
29.4	0.118195	29.4	-1.109e-05	29.4	0.0064698
29.59	0.116352	29.59	0.00246593	29.59	0.00776762
29.8	0.119199	29.8	0.00211715	29.8	0.00880585
30	0.116017	30	0.00026471	30	0.0101404
30.19	0.111485	30.19	0.00145594	30.19	0.00785514
30.4	0.114373	30.4	0.00140865	30.4	0.00797291
30.59	0.112542	30.59	0.00413577	30.59	0.00637619
30.8	0.111491	30.8	0.00555137	30.8	0.00662306
31	0.115238	31	0.00551743	31	0.00648788
31.19	0.116606	31.19	0.00202245	31.19	0.00741447
31.39	0.113404	31.39	0.00312835	31.39	0.00733283
31.6	0.111607	31.6	0.00071269	31.6	0.00659772
31.8	0.112569	31.8	0.00850244	31.8	0.00434256
31.99	0.113566	31.99	0.00313769	31.99	0.00546603
32.19	0.112109	32.19	0.0043801	32.19	0.00387929
32.39	0.11442	32.39	0.00132375	32.39	0.0043785
32.59	0.11494	32.59	0.00080578	32.59	0.00557534
32.79	0.11198	32.79	0.00477629	32.79	0.00714426
32.99	0.115836	32.99	-0.00050402	32.99	0.00530357
33.19	0.111928	33.19	0.0056201	33.19	0.00475659
33.39	0.114205	33.39	0.003134	33.39	0.0111489
33.59	0.11453	33.59	0.00150362	33.59	0.00687314
33.79	0.117336	33.79	0.0017618	33.79	0.00657033
33.99	0.110339	33.99	0.00499866	33.99	0.00533667
34.19	0.11366	34.19	0.00532174	34.19	0.00658484
34.39	0.113225	34.39	0.0032653	34.39	0.00638686
34.59	0.11317	34.59	0.0005319	34.59	0.00703125
34.79	0.115049	34.79	0.00763434	34.79	0.0092749
34.99	0.113506	34.99	0.00302297	34.99	0.00721569
35.19	0.115408	35.19	0.00289088	35.19	0.00543567
35.39	0.117209	35.39	0.00559589	35.39	0.00638004
35.59	0.118994	35.59	0.00503535	35.59	0.00613671
35.79	0.116737	35.79	0.00133646	35.79	0.00874756
35.99	0.113423	35.99	0.00249914	35.99	0.00284139
36.19	0.113646	36.19	0.00666388	36.19	0.00604313
36.39	0.115242	36.39	0.00366723	36.39	0.00949275
36.59	0.114284	36.59	0.00081302	36.59	0.00809685
36.79	0.117918	36.79	0.00671885	36.79	0.00728363
36.99	0.114503	36.99	0.00446738	36.99	0.00814853
37.19	0.112878	37.19	0.00153585	37.19	0.00796781
37.39	0.116408	37.39	0.00521516	37.39	0.00675226
37.59	0.115866	37.59	0.00569417	37.59	0.00536246
37.79	0.11135	37.79	0.00326503	37.79	0.00797774
37.99	0.118059	37.99	0.00401715	37.99	0.00652291
38.19	0.115103	38.19	0.00052216	38.19	0.00421854
38.4	0.115396	38.4	0.00153071	38.4	0.00995479
38.59	0.116732	38.59	0.00264623	38.59	0.00611392
38.79	0.114382	38.79	0.00311672	38.79	0.00531283
38.99	0.113128	38.99	0.00265552	38.99	0.00507065
39.19	0.113286	39.19	-0.00028814	39.19	0.00914682
39.4	0.112345	39.4	0.00466928	39.4	0.00689944
39.59	0.109066	39.59	-0.00173819	39.59	0.008163
39.79	0.115228	39.79	0.0018766	39.79	0.00648171
39.99	0.110575	39.99	0.00441762	39.99	0.006608
40.19	0.114454	40.19	0.0041208	40.19	0.00671112
40.4	0.11374	40.4	0.00234405	40.4	0.00568828
40.59	0.113334	40.59	0.00429368	40.59	0.00743351
40.79	0.113165	40.79	0.00088796	40.79	0.0068448
40.99	0.115718	40.99	0.00554799	40.99	0.00493313
41.19	0.114853	41.19	0.00081966	41.19	0.00930002
41.4	0.118074	41.4	0.00575519	41.4	0.00884115
41.59	0.116787	41.59	0.0039502	41.59	0.00502339
41.79	0.113709	41.79	0.00550921	41.79	0.00669128
41.99	0.114654	41.99	0.00326022	41.99	0.008758
42.19	0.115685	42.19	0.00700424	42.19	0.00632124
42.4	0.116081	42.4	0.00316465	42.4	0.00331819
42.59	0.113483	42.59	0.00316291	42.59	0.00229981
42.79	0.114568	42.79	0.0026785	42.79	0.00939596
42.99	0.117939	42.99	0.00539869	42.99	0.00863502
43.19	0.112673	43.19	0.00371286	43.19	0.00612182
43.4	0.115886	43.4	0.0008083	43.4	0.00718764
43.59	0.119485	43.59	0.00206339	43.59	0.00507129
43.79	0.116967	43.79	0.00410349	43.79	0.00883946
43.99	0.113236	43.99	0.00292718	43.99	0.00930183
44.19	0.115257	44.19	0.00210801	44.19	0.00461448
44.39	0.114203	44.39	0.00264866	44.39	0.00789256
44.59	0.117534	44.59	0.00259216	44.59	0.0102154
44.79	0.116951	44.79	0.00084692	44.79	0.00546349
44.99	0.112167	44.99	0.0018038	44.99	0.00903501
45.19	0.115834	45.19	0.00583472	45.19	0.00725658
45.4	0.113233	45.4	0.00465547	45.4	0.00797917
45.59	0.115023	45.59	0.00464916	45.59	0.0065381
45.79	0.11639	45.79	0.00307884	45.79	0.00625056
45.99	0.110325	45.99	0.00181662	45.99	0.00477169
46.19	0.117522	46.19	0.00594496	46.19	0.00972145
46.4	0.117456	46.4	0.00323735	46.4	0.00953946
46.59	0.117868	46.59	0.00448559	46.59	0.00662025
46.79	0.11416	46.79	0.00669852	46.79	0.00606245
46.99	0.115269	46.99	0.00203365	46.99	0.00337281
47.19	0.113093	47.19	0.00463937	47.19	0.00645256
47.39	0.113911	47.39	0.00543064	47.39	0.00727959
47.59	0.116301	47.59	0.00492543	47.59	0.00757666
47.79	0.113459	47.79	0.00127018	47.79	0.0102845
47.99	0.111779	47.99	0.00649329	47.99	0.00596198
48.19	0.113764	48.19	-0.00037511	48.19	0.00525687
48.4	0.115514	48.4	0.00430605	48.4	0.00621042
48.59	0.116067	48.59	0.00037329	48.59	0.00702685
48.79	0.115631	48.79	0.00448514	48.79	0.00768675
48.99	0.113477	48.99	0.00478148	48.99	0.00746959
49.19	0.11837	49.19	0.00239357	49.19	0.00641152
49.39	0.114499	49.39	-0.00011064	49.39	0.00707817
49.59	0.112824	49.59	0.00298865	49.59	0.00907204
49.79	0.113296	49.79	0.00348208	49.79	0.00811588
49.99	0.115749	49.99	0.00250888	49.99	0.00701518
50.19	0.116476	50.19	0.00324136	50.19	0.00882114
50.39	0.11854	50.39	0.00254047	50.39	0.00796652
50.59	0.115811	50.59	0.00434794	50.59	0.00614519
50.79	0.113889	50.79	0.00435513	50.79	0.00883357
50.99	0.11409	50.99	0.00111048	50.99	0.00751375
51.19	0.114609	51.19	0.0006137	51.19	0.00646867
51.4	0.117138	51.4	0.00392794	51.4	0.00875323
51.59	0.115982	51.59	0.00588091	51.59	0.00786014
51.79	0.120724	51.79	0.00348123	51.79	0.00848537
51.99	0.1144	51.99	0.00320074	51.99	0.00825351
52.19	0.113909	52.19	0.00483686	52.19	0.00923876
52.39	0.11704	52.39	0.00302725	52.39	0.00655427
52.59	0.114557	52.59	0.00043818	52.59	0.00725734
52.79	0.113926	52.79	0.00471162	52.79	0.0101156
52.99	0.114542	52.99	-0.00109293	52.99	0.00596881
53.19	0.115068	53.19	0.00222026	53.19	0.00954971
53.39	0.113892	53.39	0.00420324	53.39	0.00427377
53.59	0.11457	53.59	0.00395964	53.59	0.00875399
53.79	0.115891	53.79	0.00048045	53.79	0.00657204
53.99	0.115777	53.99	0.00179348	53.99	0.0051758
54.19	0.114655	54.19	0.00458392	54.19	0.00627995
54.39	0.114818	54.39	0.00556836	54.39	0.0050296
54.59	0.114873	54.59	-0.00045461	54.59	0.00939915
54.79	0.110943	54.79	0.00314344	54.79	0.00692757
54.99	0.116909	54.99	0.00323673	54.99	0.00467757
55.19	0.116658	55.19	0.00274557	55.19	0.0110682
55.39	0.115064	55.39	0.00218011	55.39	0.00822157
55.59	0.115994	55.59	0.00583886	55.59	0.00606692
55.79	0.116773	55.79	0.00344022	55.79	0.0116997
55.99	0.116851	55.99	0.00134407	55.99	0.00969922
56.19	0.116888	56.19	-0.00035545	56.19	0.0104061
56.39	0.115924	56.39	0.00171352	56.39	0.00868728
56.59	0.117292	56.59	-0.00169063	56.59	0.00676105
56.79	0.115484	56.79	0.00496178	56.79	0.00812881
56.99	0.115942	56.99	0.0003164	56.99	0.00552406
57.19	0.11679	57.19	0.00288866	57.19	0.00842885
57.39	0.114257	57.39	0.00422852	57.39	0.00242556
57.59	0.115364	57.59	0.00484947	57.59	0.00722736
57.79	0.116089	57.79	0.00395829	57.79	0.00664853
57.99	0.116757	57.99	-0.00021336	57.99	0.00456047
58.19	0.116769	58.19	0.0035665	58.19	0.00912532
58.4	0.116123	58.4	0.00213933	58.4	0.0112115
58.59	0.120847	58.59	0.00185649	58.59	0.00790578
58.79	0.11317	58.79	0.00210834	58.79	0.00689316
58.99	0.115334	58.99	0.00188937	58.99	0.00754528
59.19	0.114361	59.19	0.00176517	59.19	0.00860074
59.4	0.11733	59.4	0.00110857	59.4	0.00821737
59.59	0.114795	59.59	0.00234724	59.59	0.00937394
59.79	0.111289	59.79	0.00264607	59.79	0.00486341
59.99	0.116452	59.99	0.00315586	59.99	0.00583973
60.19	0.116077	60.19	0.00349137	60.19	0.00857703
60.4	0.114616	60.4	0.00238393	60.4	0.0114695
60.59	0.115313	60.59	0.00169052	60.59	0.00746746
60.79	0.117606	60.79	0.00319423	60.79	0.00859995
60.99	0.114115	60.99	0.00258819	60.99	0.00844704
61.19	0.115869	61.19	0.00217817	61.19	0.00522359
61.39	0.115164	61.39	0.00515162	61.39	0.00700634
61.59	0.113096	61.59	-0.00033561	61.59	0.0104283
61.79	0.115832	61.79	0.0040555	61.79	0.00889044
61.99	0.113295	61.99	0.00544174	61.99	0.00926135
62.19	0.114708	62.19	0.00057569	62.19	0.00597716
62.4	0.109434	62.4	0.00111644	62.4	0.00565049
62.59	0.113676	62.59	7.7e-07	62.59	0.00562315
62.79	0.115191	62.79	0.00192713	62.79	0.00927741
62.99	0.118266	62.99	0.00310832	62.99	0.00978451
63.19	0.11495	63.19	0.00502642	63.19	0.00678354
63.4	0.115582	63.4	-9.385e-05	63.4	0.00846271
63.59	0.115256	63.59	0.00033089	63.59	0.00433264
63.79	0.115486	63.79	0.00259461	63.79	0.00708654
63.99	0.11752	63.99	0.00392215	63.99	0.00808019
64.19	0.113703	64.19	0.00561045	64.19	0.00550867
64.4	0.116391	64.4	2.405e-05	64.4	0.00711931
64.59	0.116738	64.59	0.00537622	64.59	0.00426942
64.8	0.115933	64.8	0.00121744	64.8	0.00710428
65	0.116671	65	0.00362743	65	0.00719248
65.19	0.117639	65.19	0.00321721	65.19	0.00636973
65.4	0.116542	65.4	0.00571613	65.4	0.00792404
65.59	0.114304	65.59	0.00397421	65.59	0.00735072
65.8	0.116083	65.8	0.00548908	65.8	0.00562842
65.99	0.115101	65.99	0.00478471	65.99	0.00950537
66.19	0.115596	66.19	0.00270627	66.19	0.00745488
66.39	0.118452	66.39	0.00358164	66.39	0.00721691
66.6	0.111715	66.6	0.001006	66.6	0.00801875
66.8	0.116036	66.8	0.0014027	66.8	0.00772334
66.99	0.114502	66.99	0.00451633	66.99	0.00953314
67.19	0.115325	67.19	0.00217917	67.19	0.00705222
67.4	0.117325	67.4	0.00186535	67.4	0.00520879
67.6	0.117206	67.6	0.00227138	67.6	0.00767734
67.79	0.116447	67.79	0.004872	67.79	0.00670395
68	0.115774	68	0.00215853	68	0.00600956
68.19	0.11383	68.19	0.00167497	68.19	0.0050333
68.4	0.115142	68.4	0.00196686	68.4	0.00720306
68.6	0.114174	68.6	0.0062143	68.6	0.00910201
68.79	0.114513	68.79	0.00129615	68.79	0.0106139
69	0.114299	69	0.00284332	69	0.00904282
69.19	0.11825	69.19	0.00223308	69.19	0.00599805
69.4	0.115923	69.4	0.00260004	69.4	0.00552623
69.59	0.114933	69.59	0.00218974	69.59	0.00850554
69.8	0.11526	69.8	-0.00058401	69.8	0.00710055
70	0.115759	70	0.00265821	70	0.00503509
70.19	0.113265	70.19	-0.00098197	70.19	0.00898609
70.39	0.116415	70.39	0.00328236	70.39	0.00873683
70.59	0.115269	70.59	0.00478948	70.59	0.00733687
70.8	0.117987	70.8	0.00262758	70.8	0.00781013
70.99	0.114123	70.99	0.00197037	70.99	0.0100142
71.19	0.116307	71.19	0.00026009	71.19	0.00908581
71.39	0.116775	71.39	0.00026649	71.39	0.00684669
71.6	0.116596	71.6	0.00318781	71.6	0.00987168
71.8	0.114311	71.8	0.00364168	71.8	0.00705672
71.99	0.112444	71.99	0.00471149	71.99	0.0092943
72.19	0.119189	72.19	0.00287833	72.19	0.00764879
72.39	0.11621	72.39	0.00374106	72.39	0.00699295
72.6	0.115432	72.6	0.00231427	72.6	0.00278697
72.79	0.11254	72.79	0.0006089	72.79	0.00809948
72.99	0.120813	72.99	-0.00165526	72.99	0.00531058
73.19	0.11497	73.19	0.00298087	73.19	0.00576226
73.4	0.11529	73.4	0.00045321	73.4	0.00566919
73.59	0.114262	73.59	0.00103604	73.59	0.00788448
73.79	0.11526	73.79	0.00032052	73.79	0.00991848
73.99	0.119132	73.99	0.00101704	73.99	0.00865004
74.19	0.116607	74.19	0.00249183	74.19	0.00825822
74.39	0.113105	74.39	0.00439331	74.39	0.00740133
74.59	0.117488	74.59	0.00147893	74.59	0.00927538
74.8	0.116437	74.8	0.00072279	74.8	0.00653355
74.99	0.118073	74.99	0.00383162	74.99	0.00933974
75.19	0.114366	75.19	-0.00019169	75.19	0.00800199
75.39	0.116499	75.39	0.00198436	75.39	0.00815097
75.59	0.118675	75.59	0.00377728	75.59	0.011559
75.79	0.114881	75.79	0.00423202	75.79	0.00763239
75.99	0.11631	75.99	0.00464877	75.99	0.00726481
76.19	0.116343	76.19	-9.618e-05	76.19	0.00720839
76.39	0.113755	76.39	0.00248577	76.39	0.00846578
76.6	0.11598	76.6	0.00325312	76.6	0.0065636
76.79	0.115128	76.79	0.00531793	76.79	0.00655245
76.99	0.116618	76.99	0.0049786	76.99	0.00677111
77.19	0.111515	77.19	-0.00015233	77.19	0.00198089
77.4	0.114942	77.4	-0.00239557	77.4	0.0110428
77.6	0.112601	77.6	-0.00077716	77.6	0.00499125
77.8	0.116286	77.8	0.00084321	77.8	0.00633468
78	0.113025	78	-0.00033376	78	0.00434085
78.19	0.117518	78.19	0.00131866	78.19	0.010417
78.4	0.116785	78.4	0.00430208	78.4	0.00254479
78.6	0.114893	78.6	-0.00203668	78.6	0.00646316
78.8	0.117355	78.8	-0.00032556	78.8	0.00591332
79	0.115572	79	-0.00047	79	0.00636923
79.19	0.115718	79.19	0.00275351	79.19	0.00858052
79.39	0.113856	79.39	0.00195208	79.39	0.00732329
79.6	0.116207	79.6	0.00502656	79.6	0.00683758
79.8	0.114654	79.8	0.00212857	79.8	0.00429203
80	0.115617	80	0.004797	80	0.0088626
80.19	0.116177	80.19	0.00303038	80.19	0.00999981
80.4	0.117888	80.4	0.0047872	80.4	0.0040378
80.6	0.115032	80.6	0.00268473	80.6	0.00966723
80.8	0.116372	80.8	0.00402484	80.8	0.0076279
81	0.11545	81	-0.00180018	81	0.00622879
81.19	0.116038	81.19	0.00254576	81.19	0.0030986
81.4	0.115312	81.4	0.00167457	81.4	0.00539808
81.59	0.115733	81.59	0.00463286	81.59	0.010251
81.8	0.119053	81.8	0.00294909	81.8	0.00929268
82	0.113508	82	0.00174758	82	0.00413178
82.19	0.116967	82.19	0.00205873	82.19	0.00723168
82.4	0.115591	82.4	-0.00010445	82.4	0.00287286
82.59	0.112418	82.59	0.00134803	82.59	0.00676058
82.8	0.119523	82.8	0.00070011	82.8	0.00544896
83	0.117375	83	0.00179683	83	0.00386501
83.19	0.115711	83.19	0.00096868	83.19	0.00758562
83.39	0.116439	83.39	0.00269295	83.39	0.00815177
83.6	0.117545	83.6	-0.00195779	83.6	0.0115364
83.8	0.118517	83.8	0.00156702	83.8	0.00703891
84	0.116603	84	0.00150299	84	0.00561718
84.19	0.114844	84.19	-0.00117398	84.19	0.00599341
84.4	0.117752	84.4	0.0032343	84.4	0.00351257
84.6	0.114522	84.6	-0.00159284	84.6	0.00599997
84.79	0.115679	84.79	0.00058626	84.79	0.00677387
84.99	0.114479	84.99	0.00013121	84.99	0.00157885
85.19	0.115987	85.19	0.00060444	85.19	0.00928364
85.4	0.116642	85.4	0.00298788	85.4	0.0040613
85.6	0.120571	85.6	0.0021134	85.6	0.00815616
85.79	0.117966	85.79	0.00279991	85.79	0.00681826
86	0.115312	86	0.00065097	86	0.00924539
86.19	0.115123	86.19	0.00234335	86.19	0.00618586
86.4	0.116086	86.4	0.00064157	86.4	0.00346218
86.59	0.114017	86.59	0.0016257	86.59	0.00673239
86.8	0.114456	86.8	0.00123659	86.8	0.00822042
87	0.118383	87	-0.00040819	87	0.00472591
87.19	0.118216	87.19	0.00136255	87.19	0.00541314
87.39	0.114716	87.39	0.00440302	87.39	0.0089133
87.59	0.116033	87.59	0.00022197	87.59	0.00703287
87.8	0.114024	87.8	0.00177751	87.8	0.00627589
88	0.117387	88	-0.00041138	88	0.00453584
88.19	0.115579	88.19	0.00018916	88.19	0.00486846
88.39	0.118155	88.39	0.00023728	88.39	0.00588642
88.6	0.114841	88.6	0.00073333	88.6	0.00879105
88.8	0.118903	88.8	-0.00017229	88.8	0.00644619
88.99	0.112598	88.99	-0.00040223	88.99	0.0061596
89.19	0.120741	89.19	0.00221852	89.19	0.00844139
89.4	0.115118	89.4	0.00176694	89.4	0.00874327
89.6	0.11559	89.6	0.00100737	89.6	0.00562406
89.79	0.115877	89.79	0.00068566	89.79	0.00887723
89.99	0.113347	89.99	0.00388678	89.99	0.00585159
90.19	0.116859	90.19	0.00144596	90.19	0.00481524
90.4	0.116576	90.4	0.00142736	90.4	0.00801051
90.6	0.114127	90.6	0.00049459	90.6	0.00790585
90.79	0.116239	90.79	0.00406658	90.79	0.00599311
90.99	0.1142	90.99	0.00159318	90.99	0.00450713
91.19	0.115349	91.19	0.00240645	91.19	0.00600419
91.4	0.1161	91.4	-0.00066037	91.4	0.00604734
91.59	0.11848	91.59	0.00205129	91.59	0.00731225
91.8	0.115535	91.8	0.0008355	91.8	0.00543063
91.99	0.114318	91.99	0.00222191	91.99	0.00230539
92.19	0.114703	92.19	0.00333863	92.19	0.00693676
92.39	0.114502	92.39	0.00303398	92.39	0.00456234
92.59	0.115613	92.59	0.0017254	92.59	0.00384127
92.8	0.11862	92.8	0.00048009	92.8	0.00539559
93	0.11461	93	0.00214711	93	0.00817082
93.19	0.116466	93.19	0.00051369	93.19	0.00690402
93.39	0.111925	93.39	0.00068587	93.39	0.00580085
93.6	0.115853	93.6	-0.00209082	93.6	0.00779779
93.79	0.114153	93.79	-0.00093254	93.79	0.00295522
93.99	0.115637	93.99	-0.00041673	93.99	0.00652415
94.19	0.115847	94.19	0.00178757	94.19	0.00838733
94.39	0.116527	94.39	0.00262792	94.39	0.00875259
94.6	0.114159	94.6	0.00011664	94.6	0.00516534
94.79	0.117704	94.79	0.00441347	94.79	0.0098021
94.99	0.115395	94.99	0.00064074	94.99	0.0068634
95.19	0.118701	95.19	0.00418051	95.19	0.00750969
95.39	0.117309	95.39	0.00278604	95.39	0.00357299
95.59	0.11688	95.59	0.00250626	95.59	0.00615139
95.79	0.11584	95.79	0.00235618	95.79	0.00427893
95.99	0.116108	95.99	0.00299405	95.99	0.00710688
96.19	0.118267	96.19	0.00236729	96.19	0.00780116
96.39	0.114526	96.39	0.00431003	96.39	0.00580383
96.59	0.117214	96.59	0.00220135	96.59	0.00479748
96.79	0.113586	96.79	0.00077428	96.79	0.00895311
97	0.114198	97	0.00322323	97	0.00625991
97.19	0.114083	97.19	0.00128584	97.19	0.00789991
97.4	0.113042	97.4	0.00175613	97.4	0.00621075
97.6	0.115231	97.6	0.00249597	97.6	0.00784286
97.8	0.118538	97.8	0.00258074	97.8	0.00513709
98	0.114397	98	0.00025837	98	0.00422951
98.19	0.116681	98.19	1.939e-05	98.19	0.00531767
98.4	0.115975	98.4	0.00258135	98.4	0.00643488
98.59	0.117957	98.59	0.00300915	98.59	0.00743775
98.8	0.117437	98.8	-0.00248199	98.8	0.00934353
99	0.118582	99	0.00124877	99	0.00690801
99.19	0.11576	99.19	7.779e-05	99.19	0.00642872
99.4	0.116593	99.4	0.00023426	99.4	0.00761329
99.59	0.117438	99.59	0.00086541	99.59	0.00617304
99.8	0.116146	99.8	0.00183384	99.8	0.00274306
100	0.117005	100	-0.00138637	100	0.00878012
100.19	0.117579	100.19	0.0022894	100.19	0.00395558
100.39	0.114849	100.39	0.00359814	100.39	0.00755455
100.6	0.117163	100.6	0.00112664	100.6	0.00736486
100.8	0.112489	100.8	0.00219051	100.8	0.00413218
101	0.113394	101	-0.00161349	101	0.00572135
101.19	0.11382	101.19	0.00017519	101.19	0.00608719
101.39	0.116022	101.39	-0.00201622	101.39	0.00928112
101.6	0.115239	101.6	-0.00074627	101.6	0.00514938
101.8	0.115774	101.8	-0.0005608	101.8	0.00690966
102	0.116245	102	0.00384922	102	0.00794483
102.19	0.117703	102.19	0.00198843	102.19	0.00498186
102.4	0.115622	102.4	0.00273345	102.4	0.00616107
102.6	0.116979	102.6	0.00211878	102.6	0.00768987
102.79	0.114589	102.79	-0.00330231	102.79	0.0111579
103	0.111945	103	-0.00039473	103	0.00876103
103.19	0.117431	103.19	0.00146597	103.19	0.00475232
103.4	0.116971	103.4	-0.0002312	103.4	0.00617067
103.59	0.115845	103.59	-0.00092399	103.59	0.00898835
103.79	0.113869	103.79	-0.00078319	103.79	0.00496404
104	0.114653	104	3.99e-06	104	0.00827753
104.19	0.114691	104.19	-0.00219239	104.19	0.00730601
104.4	0.114154	104.4	0.00197425	104.4	0.0088746
104.59	0.119696	104.59	0.00127931	104.59	0.0056525
104.8	0.113416	104.8	0.00144328	104.8	0.00748586
105	0.117141	105	-0.00124058	105	0.00700477
105.19	0.11653	105.19	0.00314241	105.19	0.00605605
105.39	0.113863	105.39	-0.00032685	105.39	0.00488374
105.6	0.11382	105.6	-0.0011968	105.6	0.00732569
105.8	0.116404	105.8	0.00142551	105.8	0.00560046
106	0.114626	106	0.00118965	106	0.00377385
106.19	0.115974	106.19	0.00024949	106.19	0.00625748
106.39	0.116727	106.39	0.00329562	106.39	0.00778129
106.6	0.117835	106.6	0.00053	106.6	0.00921313
106.8	0.114969	106.8	-0.00051775	106.8	0.00527177
107	0.115505	107	0.00227212	107	0.00629286
107.19	0.116408	107.19	-0.0007688	107.19	0.00568201
107.4	0.115452	107.4	-0.00385078	107.4	0.0071712
107.6	0.116686	107.6	0.00426232	107.6	0.0072008
107.79	0.115268	107.79	0.00058565	107.79	0.00604343
107.99	0.11504	107.99	-0.00211149	107.99	0.00508324
108.19	0.114438	108.19	-0.00252632	108.19	0.00706324
108.4	0.111137	108.4	-0.00114487	108.4	0.00826837
108.59	0.112388	108.59	0.00230777	108.59	0.00504541
108.79	0.114103	108.79	-0.00023135	108.79	0.00289612
108.99	0.115318	108.99	-0.00072504	108.99	0.00383768
109.19	0.111194	109.19	-0.00173857	109.19	0.00493491
109.4	0.113483	109.4	-0.00048323	109.4	0.00637275
109.59	0.120789	109.59	9.438e-05	109.59	0.00809233
109.79	0.118404	109.79	-0.00249679	109.79	0.00506013
110	0.115489	110	-0.00081717	110	0.0047354
110.19	0.11745	110.19	0.00121522	110.19	0.00769848
110.39	0.114795	110.39	0.00193603	110.39	0.00539724
110.6	0.114506	110.6	0.00151454	110.6	0.0081794
110.79	0.115672	110.79	7.95e-06	110.79	0.00785052
110.99	0.112121	110.99	0.00096083	110.99	0.00234352
111.19	0.117304	111.19	-2.602e-05	111.19	0.00694368
111.39	0.117427	111.39	0.00033876	111.39	0.00503504
111.6	0.114723	111.6	0.00602435	111.6	0.00616412
111.8	0.115277	111.8	0.00192634	111.8	0.00670601
111.99	0.114177	111.99	0.00028779	111.99	0.00660544
112.19	0.115096	112.19	0.00175629	112.19	0.00643739
112.4	0.114501	112.4	0.00355219	112.4	0.00691078
112.6	0.114079	112.6	-0.00147477	112.6	0.00592963
112.79	0.112923	112.79	0.00107547	112.79	0.00623811
112.99	0.116517	112.99	-0.00170215	112.99	0.00738502
113.19	0.11496	113.19	0.00031728	113.19	0.00572066
113.4	0.111692	113.4	-0.00044893	113.4	0.00864994
113.59	0.115503	113.59	-0.00124189	113.59	0.00581061
113.79	0.111624	113.79	-0.00380241	113.79	0.00660742
113.99	0.117248	113.99	0.0002385	113.99	0.00245398
114.19	0.119096	114.19	0.0017239	114.19	0.0050797
114.39	0.116707	114.39	0.00324902	114.39	0.00584186
114.59	0.11479	114.59	-0.00266036	114.59	0.00713241
114.79	0.115726	114.79	0.0007772	114.79	0.00660567
115	0.119643	115	0.00150356	115	0.00613108
115.19	0.113476	115.19	0.00325721	115.19	0.00598966
115.39	0.113795	115.39	0.00182463	115.39	0.00570197
115.59	0.11685	115.59	-0.00070372	115.59	0.00772806
115.79	0.114408	115.79	0.00249621	115.79	0.00455065
115.99	0.113392	115.99	0.00046936	115.99	0.00766325
116.19	0.113402	116.19	0.00012154	116.19	0.00381697
116.39	0.114249	116.39	-0.00127926	116.39	0.00506647
116.6	0.117901	116.6	-0.00054532	116.6	0.00842973
116.8	0.113988	116.8	-0.00101174	116.8	0.00821273
117	0.116214	117	-0.00103279	117	0.0033787
117.19	0.114873	117.19	-0.00016622	117.19	0.00647099
117.39	0.113414	117.39	-0.00109741	117.39	0.00300411
117.6	0.112273	117.6	0.00212525	117.6	0.00332818
117.8	0.114457	117.8	-0.00569355	117.8	0.00450225
118	0.120904	118	0.00133472	118	0.00666769
118.19	0.111668	118.19	-0.00253501	118.19	0.00297462
118.39	0.115619	118.39	0.00042085	118.39	0.00677119
118.6	0.117807	118.6	8.674e-05	118.6	0.00334955
118.8	0.117009	118.8	0.00160518	118.8	0.00496325
119	0.117608	119	-0.00196451	119	0.00333252
119.19	0.117588	119.19	0.00170034	119.19	0.00572507
119.4	0.117215	119.4	0.00039622	119.4	0.00435257
119.6	0.115463	119.6	-0.00072258	119.6	0.00832254
119.8	0.118831	119.8	0.00266789	119.8	0.00529591
119.99	0.113929	119.99	0.00149943	119.99	0.00697868
120.19	0.116872	120.19	0.00148647	120.19	0.00513131
120.4	0.119945	120.4	0.00051232	120.4	0.00596849
120.6	0.116088	120.6	0.00040757	120.6	0.00570452
120.8	0.116497	120.8	0.00230023	120.8	0.00672506
121	0.116572	121	0.0013065	121	0.00498227
121.19	0.114708	121.19	0.00082257	121.19	0.0047415
121.4	0.118683	121.4	-0.00050529	121.4	0.00626515
121.59	0.118883	121.59	0.00016588	121.59	0.00214239
121.8	0.115482	121.8	0.00207404	121.8	0.00541246
122	0.115552	122	-0.00196331	122	0.00515377
122.19	0.115104	122.19	0.00157458	122.19	0.00500487
122.39	0.115046	122.39	-0.00105795	122.39	0.00585862
122.59	0.114569	122.59	-0.003074	122.59	0.00612605
122.8	0.11285	122.8	-0.00290838	122.8	0.00329489
123	0.109661	123	-0.00158096	123	0.00223627
123.19	0.11503	123.19	-0.00227921	123.19	0.00174099
123.39	0.114144	123.39	-0.00111985	123.39	0.00360299
123.6	0.114652	123.6	-0.00329958	123.6	0.00593937
123.8	0.11601	123.8	0.00088068	123.8	0.00601579
124	0.11602	124	-0.00403514	124	0.00519853
124.19	0.113645	124.19	-0.00490392	124.19	0.00523274
124.4	0.117502	124.4	2.602e-05	124.4	0.00544159
124.6	0.118312	124.6	-0.00337184	124.6	0.00825655
124.8	0.110419	124.8	0.00113308	124.8	0.00378659
124.99	0.113437	124.99	-0.00038886	124.99	0.00413647
125.19	0.11586	125.19	0.00030276	125.19	0.00309046
125.4	0.115968	125.4	0.00246003	125.4	0.00729265
125.6	0.114478	125.6	0.00048823	125.6	0.00152205
125.79	0.116327	125.79	-0.00187323	125.79	0.00623088
126	0.113042	126	-0.00104549	126	0.00324887
126.19	0.115222	126.19	-0.00107381	126.19	0.00484501
126.4	0.117404	126.4	0.0005302	126.4	0.00054464
126.59	0.114909	126.59	0.00129149	126.59	0.00269967
126.8	0.116162	126.8	0.00014074	126.8	0.00384729
126.99	0.117975	126.99	-0.00090079	126.99	0.00470741
127.19	0.113284	127.19	-0.00280395	127.19	0.00393123
127.39	0.116612	127.39	0.00037251	127.39	0.00158332
127.59	0.116084	127.59	-0.00223405	127.59	0.0063293
127.8	0.116866	127.8	-0.00226708	127.8	0.00418659
128	0.115443	128	-0.0015075	128	0.00418505
128.19	0.115647	128.19	0.00101558	128.19	0.0033309
128.39	0.112611	128.39	-0.00263105	128.39	0.00354352
128.6	0.114656	128.6	-5.896e-05	128.6	0.00472703
128.79	0.117179	128.79	-0.00446042	128.79	0.0126676
128.99	0.116476	128.99	-0.00108303	128.99	0.00696006
129.19	0.115556	129.19	-0.00310145	129.19	0.00627106
129.39	0.115398	129.39	-0.0006531	129.39	0.00824583
129.6	0.117673	129.6	-0.00399373	129.6	0.0052938
129.79	0.119836	129.79	0.00216582	129.79	0.0031519
129.99	0.115048	129.99	-0.00113738	129.99	0.00334671
130.19	0.111065	130.19	-0.00067545	130.19	0.00869559
130.39	0.114837	130.39	-0.00021428	130.39	0.0040266
130.59	0.119952	130.59	0.00030934	130.59	0.00540341
130.79	0.112851	130.79	0.00141527	130.79	0.00679432
130.99	0.113251	130.99	-0.00072721	130.99	0.00727076
131.19	0.115553	131.19	-0.00014451	131.19	0.00484975
131.39	0.117166	131.39	-0.00016569	131.39	0.00206295
131.59	0.117062	131.59	-0.00218448	131.59	0.00429845
131.79	0.111005	131.79	-0.00069295	131.79	0.00592226
131.99	0.116334	131.99	-0.00442482	131.99	0.00622148
132.19	0.116794	132.19	-0.00180539	132.19	0.00590296
132.39	0.115351	132.39	-0.00416143	132.39	0.00514611
132.59	0.114198	132.59	-0.00352998	132.59	0.00680183
132.79	0.117163	132.79	-0.00336997	132.79	0.00248871
132.99	0.11585	132.99	-0.00328469	132.99	0.00172054
133.19	0.117454	133.19	-0.00186595	133.19	0.00391484
133.39	0.117062	133.39	-0.00167058	133.39	0.00605831
133.59	0.113914	133.59	-0.00039398	133.59	0.00347327
133.79	0.115435	133.79	0.00053799	133.79	0.00357081
133.99	0.117689	133.99	-0.00067923	133.99	0.00276469
134.19	0.11514	134.19	-0.00122962	134.19	0.00558815
134.39	0.117389	134.39	-0.00152824	134.39	0.00373258
134.59	0.115531	134.59	0.00079239	134.59	0.00171617
134.79	0.11361	134.79	0.00213851	134.79	0.00593785
134.99	0.116225	134.99	-0.00023013	134.99	0.00602304
135.19	0.110153	135.19	0.00050668	135.19	0.00762461
135.39	0.116363	135.39	0.00265582	135.39	0.00916287
135.59	0.115519	135.59	0.00013102	135.59	0.00465965
135.79	0.116952	135.79	0.00014768	135.79	0.00781593
135.99	0.116159	135.99	0.00024096	135.99	0.00665033
136.19	0.113967	136.19	-0.00161167	136.19	0.00361419
136.39	0.114985	136.39	-0.00255949	136.39	0.00395018
136.6	0.113581	136.6	-0.00345234	136.6	0.00420817
136.79	0.116056	136.79	-0.00197137	136.79	0.00320657
136.99	0.117059	136.99	-0.00024688	136.99	0.00531715
137.19	0.115535	137.19	0.00014991	137.19	0.0043141
137.39	0.11862	137.39	-0.00103346	137.39	0.00556063
137.6	0.116535	137.6	0.00058848	137.6	0.00221597
137.79	0.112628	137.79	-0.00091774	137.79	0.00544199
137.99	0.113504	137.99	0.00062052	137.99	0.00545535
138.19	0.116563	138.19	-0.00153122	138.19	0.00354526
138.39	0.115765	138.39	-0.00101036	138.39	0.00513124
138.6	0.115699	138.6	-0.00135712	138.6	0.00126179
138.79	0.112667	138.79	-0.00236506	138.79	0.00071005
138.99	0.115914	138.99	-0.00103942	138.99	3.512e-05
139.19	0.116455	139.19	-0.00280495	139.19	0.00496969
139.39	0.116789	139.39	-0.00098478	139.39	0.00520123
139.6	0.113917	139.6	-0.00163428	139.6	0.00194732
139.79	0.113089	139.79	0.00017529	139.79	0.00251581
139.99	0.115251	139.99	-0.00175454	139.99	0.00299604
140.19	0.110675	140.19	-0.00280339	140.19	0.00304177
140.39	0.114853	140.39	-0.00040792	140.39	0.00736201
140.6	0.113407	140.6	-0.00090533	140.6	0.00251822
140.79	0.114763	140.79	-0.00107695	140.79	0.00688702
140.99	0.117325	140.99	-0.00214861	140.99	0.0042971
141.19	0.118065	141.19	-0.00257731	141.19	0.00532821
141.39	0.114794	141.39	-0.00267212	141.39	0.00570448
141.6	0.115986	141.6	0.00202273	141.6	0.0061032
141.79	0.114484	141.79	2.827e-05	141.79	0.00247937
141.99	0.112641	141.99	-0.00512731	141.99	0.00523546
142.19	0.113482	142.19	-0.00418091	142.19	0.00306244
142.39	0.114486	142.39	-0.00427368	142.39	0.00449515
142.6	0.11445	142.6	-0.00087953	142.6	0.00397541
142.79	0.117413	142.79	-0.00321408	142.79	0.00452122
142.99	0.114466	142.99	-0.00333242	142.99	0.00317412
143.19	0.115357	143.19	0.00053364	143.19	0.00624708
143.39	0.111146	143.39	-0.00248965	143.39	0.00521748
143.6	0.112071	143.6	-0.0046483	143.6	0.00273779
143.79	0.112869	143.79	-0.00220869	143.79	0.00474366
143.99	0.115661	143.99	-0.00222571	143.99	0.00389325
144.19	0.113929	144.19	-0.00190237	144.19	0.00496848
144.39	0.114082	144.39	0.00045905	144.39	0.00755214
144.59	0.112949	144.59	-0.00174433	144.59	0.00759062
144.79	0.116751	144.79	6.764e-05	144.79	0.00508451
144.99	0.114434	144.99	0.00066514	144.99	0.00274895
145.19	0.116134	145.19	-0.00255516	145.19	0.00763898
145.39	0.117123	145.39	0.00154247	145.39	0.00371041
145.6	0.111933	145.6	-0.00123762	145.6	0.00281657
145.79	0.117056	145.79	-0.00134979	145.79	0.0044649
145.99	0.117295	145.99	-0.00040242	145.99	0.00256434
146.19	0.115404	146.19	-0.00042699	146.19	0.00424774
146.39	0.114542	146.39	0.00329788	146.39	0.00918155
146.6	0.115228	146.6	-0.00348991	146.6	0.00579536
146.79	0.116399	146.79	-0.00358577	146.79	0.00714074
146.99	0.114797	146.99	-0.00291274	146.99	0.00387646
147.19	0.112556	147.19	-0.00322227	147.19	0.00255301
147.39	0.113364	147.39	-0.00200107	147.39	0.00657223
147.6	0.111774	147.6	0.00049146	147.6	0.00664889
147.79	0.116318	147.79	-0.00115513	147.79	0.00388991
147.99	0.115113	147.99	-0.001363	147.99	0.00288129
148.19	0.113067	148.19	-0.00221956	148.19	0.00434439
148.39	0.1131	148.39	0.0001113	148.39	0.00240337
148.6	0.116215	148.6	-0.00092678	148.6	0.00245797
148.79	0.117096	148.79	-0.0009117	148.79	0.00305906
148.99	0.112984	148.99	-0.00073096	148.99	0.00608377
149.19	0.114948	149.19	-0.00221607	149.19	0.00352779
149.39	0.116107	149.39	-0.00178272	149.39	0.00321935
149.59	0.113634	149.59	-0.00491447	149.59	0.00180565
149.79	0.117	149.79	-0.00270032	149.79	0.00070326
149.99	0.114281	149.99	-0.00153647	149.99	0.00388532
150.19	0.112996	150.19	-0.00149943	150.19	0.00325486
150.39	0.118451	150.39	0.00057699	150.39	0.00553383
150.59	0.113161	150.59	-0.00501296	150.59	0.00389352
150.79	0.114526	150.79	-0.00019155	150.79	0.0048926
150.99	0.117197	150.99	-0.00157224	150.99	0.00474499
151.19	0.115278	151.19	-0.0015829	151.19	0.00338603
151.39	0.114709	151.39	-0.00160672	151.39	0.00547686
151.59	0.113431	151.59	0.00199	151.59	0.00441779
151.79	0.116918	151.79	-0.00158498	151.79	0.00478605
151.99	0.113593	151.99	-0.00021057	151.99	0.00271298
152.19	0.119301	152.19	6.416e-05	152.19	0.00655756
152.39	0.114216	152.39	-6.438e-05	152.39	0.00367974
152.6	0.114814	152.6	-0.0028013	152.6	0.00232035
152.79	0.113738	152.79	-0.00281233	152.79	0.00099009
152.99	0.118221	152.99	-0.00159594	152.99	0.00417675
153.19	0.116433	153.19	0.00031354	153.19	0.00172956
153.39	0.116081	153.39	-0.00159722	153.39	0.00508746
153.59	0.116107	153.59	-0.00106646	153.59	0.00192057
153.79	0.114498	153.79	8.823e-05	153.79	0.00351673
153.99	0.110084	153.99	-0.00520756	153.99	0.00300726
154.19	0.11628	154.19	-0.00223862	154.19	0.00636208
154.39	0.114241	154.39	-0.00054014	154.39	0.00588923
154.59	0.113514	154.59	-0.00482991	154.59	0.00824806
154.79	0.113565	154.79	-0.00074669	154.79	0.00846834
154.99	0.115022	154.99	-0.00365372	154.99	0.0024211
155.19	0.117728	155.19	-0.00299404	155.19	0.00687124
155.39	0.114537	155.39	-0.00393399	155.39	0.00444186
155.59	0.111553	155.59	-0.00244008	155.59	0.00435943
155.79	0.113539	155.79	-0.00032182	155.79	0.00434964
155.99	0.112695	155.99	-0.00424832	155.99	0.00594319
156.19	0.111511	156.19	-0.00392445	156.19	0.0009182
156.39	0.115097	156.39	-0.00338922	156.39	0.00495804
156.6	0.11021	156.6	-0.00221608	156.6	0.00528404
156.79	0.113569	156.79	-0.00473797	156.79	0.00237386
156.99	0.11376	156.99	-0.00191686	156.99	0.00227772
157.19	0.115332	157.19	-0.00517999	157.19	0.00301817
157.39	0.115601	157.39	-0.00436809	157.39	0.00232281
157.6	0.116391	157.6	-0.00268401	157.6	0.00598307
157.79	0.117239	157.79	-0.00463416	157.79	0.00394797
157.99	0.113657	157.99	-0.00284353	157.99	0.00376628
158.19	0.114305	158.19	-0.00694356	158.19	0.00358065
158.39	0.115143	158.39	-0.00385287	158.39	0.00146502
158.6	0.116571	158.6	-0.00192523	158.6	0.0029523
158.79	0.116721	158.79	-0.00280887	158.79	0.00377788
158.99	0.115	158.99	0.00036519	158.99	0.00449429
159.19	0.113989	159.19	0.00034567	159.19	0.00046376
159.39	0.116279	159.39	-0.00314408	159.39	0.00498489
159.6	0.115801	159.6	-0.00120888	159.6	0.00858431
159.79	0.114372	159.79	-0.0004593	159.79	0.00640359
159.99	0.116682	159.99	-0.00412164	159.99	0.00521324
160.19	0.119685	160.19	0.00107349	160.19	0.00444267
160.39	0.11737	160.39	-0.00093055	160.39	0.00020912
160.6	0.115274	160.6	-0.00358212	160.6	0.00424726
160.79	0.112946	160.79	-0.00139531	160.79	0.0049161
160.99	0.117662	160.99	-0.00408577	160.99	0.00665052
161.19	0.116809	161.19	0.00018879	161.19	0.00506171
161.39	0.111959	161.39	-0.00329708	161.39	0.0033016
161.6	0.115348	161.6	5.462e-05	161.6	0.00370595
161.79	0.119456	161.79	-0.00321828	161.79	0.0068278
161.99	0.112196	161.99	-0.00199912	161.99	0.00381342
162.19	0.11637	162.19	-0.00482489	162.19	0.00093914
162.39	0.110466	162.39	-0.00333739	162.39	0.00462667
162.59	0.112869	162.59	-0.00433006	162.59	0.00587246
162.79	0.113531	162.79	-0.00304389	162.79	0.00406152
162.99	0.113655	162.99	-0.00063463	162.99	0.00360356
163.19	0.113556	163.19	-0.00096008	163.19	0.00158484
163.39	0.111958	163.39	-0.00392471	163.39	0.00239767
163.6	0.114247	163.6	-0.00321948	163.6	0.00366108
163.79	0.116489	163.79	-0.00143906	163.79	0.00203587
163.99	0.115419	163.99	0.00281533	163.99	0.00294671
164.19	0.114609	164.19	-0.00105407	164.19	0.00435401
164.39	0.1146	164.39	0.00184773	164.39	0.00432814
164.6	0.115463	164.6	-0.00151813	164.6	0.00550084
164.79	0.116492	164.79	-0.00223292	164.79	0.00283196
164.99	0.112827	164.99	-4.491e-05	164.99	0.00413247
165.19	0.116668	165.19	-0.00447674	165.19	0.00314399
165.39	0.11128	165.39	-0.0028278	165.39	0.00131597
165.59	0.114064	165.59	-0.00248936	165.59	0.00345207
165.79	0.113395	165.79	-0.00278283	165.79	0.0050265
165.99	0.114277	165.99	-0.0018449	165.99	0.0055996
166.19	0.113085	166.19	-0.0045551	166.19	0.00602357
166.39	0.113222	166.39	-0.00268856	166.39	0.00323957
166.59	0.112869	166.59	-0.00419109	166.59	0.00207173
166.79	0.115395	166.79	-0.00320654	166.79	0.00385239
166.99	0.116585	166.99	-0.00126775	166.99	0.00218692
167.19	0.114504	167.19	-0.00385161	167.19	0.00271645
167.39	0.114206	167.39	0.00081158	167.39	0.00380301
167.59	0.114246	167.59	-0.00025791	167.59	0.00597657
167.79	0.116353	167.79	-0.00654544	167.79	0.00267796
167.99	0.109839	167.99	-0.00374318	167.99	0.0023488
168.19	0.112969	168.19	-0.0064005	168.19	0.00070867
168.39	0.112699	168.39	-0.00355344	168.39	0.00213655
168.6	0.115804	168.6	-0.00341917	168.6	0.00606614
168.79	0.113146	168.79	-0.00103096	168.79	0.00416964
168.99	0.113422	168.99	-0.00104637	168.99	0.00725106
169.19	0.113159	169.19	-0.00275854	169.19	0.00336963
169.39	0.115287	169.39	-0.00104332	169.39	0.0027924
169.59	0.110507	169.59	-0.00011243	169.59	0.00259302
169.79	0.112439	169.79	-0.00106935	169.79	0.0036993
169.99	0.113816	169.99	-0.00221675	169.99	0.00572913
170.19	0.114508	170.19	-0.00155836	170.19	-0.00097418
170.39	0.113175	170.39	0.0012286	170.39	0.0046246
170.59	0.115695	170.59	-0.00061978	170.59	0.0053989
170.79	0.115173	170.79	-0.00190206	170.79	0.00120053
170.99	0.111936	170.99	-0.00095131	170.99	0.00403574
171.19	0.114713	171.19	-0.00392047	171.19	0.00524688
171.39	0.116303	171.39	-0.00230919	171.39	-0.00016976
171.59	0.113343	171.59	-0.00355219	171.59	0.00185221
171.79	0.1168	171.79	-0.00039276	171.79	0.00135924
171.99	0.11155	171.99	-0.00125894	171.99	0.00559738
172.19	0.11273	172.19	-0.00272266	172.19	0.00356885
172.39	0.116321	172.39	-0.00173988	172.39	0.00060864
172.59	0.11314	172.59	-0.0005539	172.59	0.00705304
172.79	0.11602	172.79	-0.00178624	172.79	0.00430543
172.99	0.115148	172.99	-0.00179811	172.99	0.00316935
173.19	0.113739	173.19	-0.00485713	173.19	0.00465413
173.39	0.115833	173.39	-0.00157882	173.39	0.00144271
173.59	0.11362	173.59	-0.00236884	173.59	0.00432737
173.79	0.113952	173.79	-0.00339425	173.79	0.00038954
173.99	0.115536	173.99	-0.00343032	173.99	0.00478876
174.19	0.112698	174.19	-0.00242275	174.19	0.00416156
174.39	0.111808	174.39	-0.00049126	174.39	0.00309315
174.59	0.117133	174.59	0.00136507	174.59	0.00388882
174.79	0.115678	174.79	0.00088862	174.79	-0.00015602
174.99	0.117102	174.99	-0.00085598	174.99	0.00309018
175.19	0.116305	175.19	-0.00262379	175.19	0.00533796
175.39	0.114442	175.39	-0.00545688	175.39	0.00611041
175.6	0.114695	175.6	-0.00322281	175.6	0.00306894
175.79	0.114625	175.79	-0.00265343	175.79	0.00600752
175.99	0.11335	175.99	-0.00017421	175.99	-0.00080594
176.19	0.111941	176.19	0.00060141	176.19	0.0030096
176.39	0.115057	176.39	-0.00198423	176.39	-0.00058346
176.6	0.113829	176.6	-0.00608114	176.6	0.00353309
176.79	0.113126	176.79	-0.00572163	176.79	0.00148792
176.99	0.110535	176.99	-0.00539101	176.99	-0.00106233
177.19	0.114955	177.19	-0.00162656	177.19	0.00089728
177.39	0.120086	177.39	-0.00225872	177.39	0.00306024
177.6	0.110916	177.6	-0.00241628	177.6	0.00223315
177.79	0.110766	177.79	0.00133307	177.79	0.00129488
177.99	0.113815	177.99	-0.00259256	177.99	0.0010528
178.19	0.112957	178.19	-0.0018351	178.19	0.00098733
178.39	0.115708	178.39	-0.00378059	178.39	0.00173386
178.6	0.115834	178.6	-0.00165551	178.6	0.0008705
178.79	0.110749	178.79	-0.0023947	178.79	0.00315319
178.99	0.114376	178.99	-0.0043801	178.99	0.00543136
179.19	0.118885	179.19	-0.00444673	179.19	0.00396663
179.39	0.116126	179.39	-0.00343098	179.39	0.00241723
179.6	0.111528	179.6	-0.00448181	179.6	0.00548707
179.79	0.112342	179.79	-0.00240092	179.79	0.00331593
179.99	0.118422	179.99	-0.00169423	179.99	0.00354929
180.19	0.112868	180.19	-0.00115298	180.19	-0.00014643
180.39	0.116754	180.39	-0.00148192	180.39	0.00365227
180.6	0.111985	180.6	-0.00209782	180.6	0.00526834
180.79	0.113258	180.79	-0.00243579	180.79	0.00502431
180.99	0.111955	180.99	-0.00102558	180.99	0.00256915
181.19	0.114502	181.19	-0.00413183	181.19	0.00632571
181.39	0.116812	181.39	-0.00240225	181.39	0.00625801
181.6	0.112085	181.6	-0.00224597	181.6	0.00272312
181.79	0.115824	181.79	-0.00388392	181.79	0.00096779
181.99	0.113172	181.99	-0.00357663	181.99	0.0016008
182.19	0.115907	182.19	-0.00447948	182.19	0.0006512
182.39	0.113515	182.39	-0.00160007	182.39	0.00081634
182.6	0.114248	182.6	-0.00380385	182.6	0.00174666
182.79	0.114548	182.79	-0.00288511	182.79	0.00240867
182.99	0.115272	182.99	-0.00201274	182.99	0.00322895
183.19	0.114899	183.19	-0.00398339	183.19	0.00518814
183.39	0.113045	183.39	-0.00281053	183.39	0.00374502
183.6	0.111983	183.6	-0.00570132	183.6	-0.00270868
183.79	0.112708	183.79	-0.00332554	183.79	0.00238799
183.99	0.115072	183.99	-0.00073752	183.99	0.00039383
184.19	0.110755	184.19	-0.00119573	184.19	0.00395646
184.39	0.115294	184.39	-0.00198918	184.39	0.00398979
184.59	0.113418	184.59	-0.00121203	184.59	-0.00072002
184.79	0.113198	184.79	-0.00347733	184.79	0.00333057
184.99	0.111657	184.99	-0.00260909	184.99	0.00280666
185.19	0.115401	185.19	-0.00219799	185.19	0.00200086
185.39	0.115883	185.39	-0.00516638	185.39	0.00362597
185.6	0.117506	185.6	0.00088511	185.6	-0.00015903
185.79	0.114965	185.79	-0.00211454	185.79	0.00228693
185.99	0.112948	185.99	-0.00035536	185.99	0.00264588
186.19	0.114979	186.19	-0.00746003	186.19	0.00420391
186.39	0.1162	186.39	-0.00438736	186.39	0.00465847
186.6	0.115774	186.6	-0.00194894	186.6	0.00131018
186.79	0.111194	186.79	-0.00285765	186.79	0.0030149
186.99	0.112097	186.99	-0.00140011	186.99	0.00398603
187.19	0.116196	187.19	-0.00656019	187.19	0.0004157
187.39	0.115577	187.39	-0.00615633	187.39	0.0011859
187.6	0.116996	187.6	-0.0032442	187.6	0.00140024
187.79	0.115181	187.79	-0.00482969	187.79	0.00340244
187.99	0.116031	187.99	-0.00239954	187.99	-0.00131941
188.19	0.117499	188.19	-0.00838472	188.19	0.00038714
188.39	0.115053	188.39	-0.00636295	188.39	-0.00278634
188.59	0.112941	188.59	-0.00356492	188.59	0.00199794
188.79	0.115316	188.79	-0.00411035	188.79	0.00244405
188.99	0.114015	188.99	-0.00060267	188.99	0.00138451
189.19	0.114138	189.19	-0.00421844	189.19	0.0013064
189.39	0.112592	189.39	-0.00347737	189.39	0.00363967
189.59	0.114318	189.59	-0.00347863	189.59	0.00384511
189.79	0.118619	189.79	-0.00042468	189.79	0.00398354
189.99	0.117017	189.99	-0.004034	189.99	0.00137052
190.19	0.111706	190.19	-0.00374154	190.19	0.00341347
190.39	0.11576	190.39	-0.00428801	190.39	0.00047599
190.59	0.112625	190.59	-0.00319302	190.59	0.00186612
190.79	0.11439	190.79	-0.00302099	190.79	0.00092806
190.99	0.11486	190.99	-0.00302773	190.99	0.00401723
191.19	0.116476	191.19	-0.00510884	191.19	0.00221145
191.39	0.114592	191.39	-0.00283269	191.39	0.0014989
191.59	0.114202	191.59	-0.00714439	191.59	-0.0004964
191.79	0.116637	191.79	0.00061714	191.79	-0.00079673
191.99	0.113441	191.99	-0.00231471	191.99	0.00049389
192.19	0.115388	192.19	-0.00480545	192.19	0.00394983
192.39	0.114417	192.39	-0.00695696	192.39	0.00134769
192.59	0.109305	192.59	-0.00494787	192.59	0.00194551
192.79	0.113396	192.79	-0.00188032	192.79	0.00265253
192.99	0.11107	192.99	-0.00182996	192.99	0.00265172
193.19	0.115916	193.19	-0.00307825	193.19	0.00514256
193.39	0.111915	193.39	-0.00544169	193.39	0.00230003
193.59	0.112997	193.59	-0.00362313	193.59	0.00342605
193.79	0.112678	193.79	-0.0042362	193.79	0.00264065
193.99	0.115469	193.99	-0.00162004	193.99	0.00234996
194.19	0.113543	194.19	-0.00084802	194.19	0.00352119
194.39	0.11371	194.39	-0.00510816	194.39	0.00180632
194.59	0.114817	194.59	-0.00360733	194.59	0.00153327
194.79	0.114482	194.79	-0.00348088	194.79	0.00347538
194.99	0.115712	194.99	-0.00469048	194.99	0.00453803
195.19	0.115934	195.19	-0.00170093	195.19	0.00480109
195.39	0.112972	195.39	-0.00482211	195.39	0.00397507
195.6	0.114798	195.6	-0.00547721	195.6	0.00288545
195.79	0.113685	195.79	-0.00239564	195.79	0.00093031
195.99	0.112308	195.99	0.00094264	195.99	0.00073395
196.19	0.116561	196.19	-0.00433084	196.19	0.00104884
196.39	0.114583	196.39	-0.00438381	196.39	-0.00015887
196.6	0.114766	196.6	-0.00715139	196.6	0.00169733
196.79	0.11213	196.79	-0.0100187	196.79	-0.00071839
196.99	0.120463	196.99	-0.00316802	196.99	0.00023223
197.19	0.113705	197.19	-0.00348396	197.19	0.00294362
197.39	0.112804	197.39	-0.00293393	197.39	0.00088769
197.59	0.113157	197.59	-0.00340784	197.59	0.00127315
197.79	0.114631	197.79	-0.0036217	197.79	0.002058
197.99	0.111839	197.99	-0.00351343	197.99	-0.00057234
198.19	0.114913	198.19	-0.00421634	198.19	0.00238671
198.39	0.112958	198.39	-0.00099431	198.39	0.00352973
198.6	0.117029	198.6	-0.00534613	198.6	-0.00102558
198.79	0.113821	198.79	-0.0043384	198.79	-0.00064356
198.99	0.116524	198.99	-0.00264654	198.99	0.00185084	loading of proteins on tip
199.19	0.112477	199.19	-0.00145499	199.19	0.0005247
199.39	0.114229	199.39	-0.0054191	199.39	0.0014691
199.6	0.114519	199.6	-1.09e-05	199.6	0.0015844
199.79	0.114012	199.79	-0.00461554	199.79	0.00185828
200	0.0993257	200	-0.03296	200	0.0434949
200.19	0.0953178	200.19	-0.0234487	200.19	0.0576244
200.39	0.0816954	200.39	-0.015877	200.39	0.0757253
200.59	0.0702984	200.59	0.00119052	200.59	0.0914071
200.79	0.0616878	200.79	0.00990409	200.79	0.108248
200.99	0.0502665	200.99	0.0272885	200.99	0.123493
201.19	0.0423424	201.19	0.0348026	201.19	0.13431
201.39	0.0387072	201.39	0.0450454	201.39	0.149743
201.59	0.0311276	201.59	0.0542078	201.59	0.155774
201.79	0.0257415	201.79	0.061964	201.79	0.165347
201.99	0.0249838	201.99	0.065856	201.99	0.170279
202.19	0.0207774	202.19	0.0750101	202.19	0.176662
202.39	0.0167369	202.39	0.0826082	202.39	0.188592
202.6	0.00843878	202.6	0.0868324	202.6	0.193985
202.79	0.0127403	202.79	0.0916558	202.79	0.201094
202.99	0.0119562	202.99	0.0917716	202.99	0.204283
203.19	0.00647572	203.19	0.0978146	203.19	0.205293
203.39	0.00604914	203.39	0.103314	203.39	0.209035
203.59	0.00146487	203.59	0.107375	203.59	0.215602
203.79	0.00089874	203.79	0.107989	203.79	0.212323
203.99	0.00134782	203.99	0.111454	203.99	0.219455
204.19	0.0017497	204.19	0.112568	204.19	0.223556
204.39	-0.00349384	204.39	0.117037	204.39	0.224223
204.59	-0.00223573	204.59	0.119653	204.59	0.22751
204.79	-0.00063504	204.79	0.120866	204.79	0.229078
204.99	-0.00029081	204.99	0.123556	204.99	0.234975
205.19	-0.00399515	205.19	0.129702	205.19	0.230107
205.39	-0.00508274	205.39	0.129243	205.39	0.237353
205.6	-0.00453674	205.6	0.125728	205.6	0.233029
205.79	-0.00548719	205.79	0.129674	205.79	0.237327
205.99	-0.00722322	205.99	0.129407	205.99	0.243286
206.19	-0.00637903	206.19	0.133867	206.19	0.238222
206.39	-0.0058678	206.39	0.131071	206.39	0.244925
206.6	-0.00800033	206.6	0.132348	206.6	0.241024
206.79	-0.00240455	206.79	0.13366	206.79	0.240106
206.99	-0.00111823	206.99	0.133484	206.99	0.242471
207.19	-0.00514967	207.19	0.136709	207.19	0.245724
207.39	-0.00279158	207.39	0.13895	207.39	0.24352
207.59	-0.00708672	207.59	0.140929	207.59	0.248576
207.79	-0.00605182	207.79	0.140298	207.79	0.248175
207.99	-0.00841038	207.99	0.14013	207.99	0.248136
208.19	-0.00564814	208.19	0.140079	208.19	0.246745
208.39	-0.00801714	208.39	0.139655	208.39	0.249629
208.59	-0.00658447	208.59	0.139787	208.59	0.251199
208.79	-0.00600459	208.79	0.142864	208.79	0.24994
208.99	-0.00162117	208.99	0.139762	208.99	0.250546
209.19	-0.00396954	209.19	0.142917	209.19	0.25298
209.39	-0.00380204	209.39	0.142825	209.39	0.251662
209.6	-0.00272028	209.6	0.141845	209.6	0.25006
209.79	-0.0077427	209.79	0.143257	209.79	0.253878
209.99	-0.00714487	209.99	0.146474	209.99	0.252053
210.19	-0.00786732	210.19	0.146924	210.19	0.254587
210.39	-0.00931998	210.39	0.144811	210.39	0.257949
210.6	-0.00865145	210.6	0.145648	210.6	0.255533
210.79	-0.00644962	210.79	0.149034	210.79	0.255231
210.99	-0.00657583	210.99	0.146802	210.99	0.260425
211.19	-0.010051	211.19	0.147923	211.19	0.257138
211.39	-0.00623952	211.39	0.147925	211.39	0.258145
211.6	-0.00543237	211.6	0.146796	211.6	0.259308
211.79	-0.00571032	211.79	0.151264	211.79	0.263164
211.99	-0.00739004	211.99	0.147046	211.99	0.260962
212.19	-0.0102413	212.19	0.153758	212.19	0.259057
212.39	-0.0092226	212.39	0.148052	212.39	0.257831
212.59	-0.00652658	212.59	0.150811	212.59	0.259939
212.79	-0.00696468	212.79	0.155322	212.79	0.263318
212.99	-0.00669136	212.99	0.150649	212.99	0.261178
213.19	-0.00643111	213.19	0.149643	213.19	0.25725
213.39	-0.0067962	213.39	0.151633	213.39	0.262483
213.6	-0.00585675	213.6	0.153586	213.6	0.26278
213.79	-0.00606936	213.79	0.153175	213.79	0.262773
213.99	-0.00322237	213.99	0.156717	213.99	0.266171
214.19	-0.0106329	214.19	0.155198	214.19	0.268353
214.39	-0.00927877	214.39	0.156357	214.39	0.265849
214.6	-0.00530988	214.6	0.159431	214.6	0.267435
214.79	-0.00629538	214.79	0.160609	214.79	0.26397
214.99	-0.00902466	214.99	0.156735	214.99	0.265863
215.19	-0.00491567	215.19	0.157216	215.19	0.268995
215.39	-0.00721262	215.39	0.158585	215.39	0.263556
215.6	-0.00727061	215.6	0.158353	215.6	0.268199
215.79	-0.00635569	215.79	0.160431	215.79	0.270103
215.99	-0.00889031	215.99	0.159623	215.99	0.26903
216.19	-0.00634102	216.19	0.161688	216.19	0.27062
216.39	-0.0084374	216.39	0.158565	216.39	0.270226
216.6	-0.00720433	216.6	0.157182	216.6	0.273412
216.79	-0.00611375	216.79	0.159649	216.79	0.274881
216.99	-0.00392766	216.99	0.161739	216.99	0.273667
217.19	-0.00651669	217.19	0.160636	217.19	0.270082
217.39	-0.00505885	217.39	0.160813	217.39	0.27361
217.59	-0.00507257	217.59	0.16301	217.59	0.277033
217.79	-0.00827166	217.79	0.162269	217.79	0.274218
217.99	-0.00790561	217.99	0.16476	217.99	0.274943
218.19	-0.00489816	218.19	0.165071	218.19	0.277556
218.39	-0.00468774	218.39	0.163271	218.39	0.272991
218.59	-0.00759192	218.59	0.168477	218.59	0.276106
218.79	-0.00814962	218.79	0.163181	218.79	0.275171
218.99	-0.00687612	218.99	0.16536	218.99	0.27752
219.19	-0.00434196	219.19	0.163095	219.19	0.274449
219.39	-0.00612393	219.39	0.163855	219.39	0.279591
219.6	-0.00708005	219.6	0.166012	219.6	0.279677
219.79	-0.00946093	219.79	0.168475	219.79	0.278431
219.99	-0.0111087	219.99	0.168318	219.99	0.275164
220.19	-0.00559574	220.19	0.16962	220.19	0.275837
220.39	-0.00758509	220.39	0.169944	220.39	0.284547
220.59	-0.00568453	220.59	0.169566	220.59	0.280706
220.79	-0.00636031	220.79	0.173343	220.79	0.284223
220.99	-0.00548527	220.99	0.172946	220.99	0.281117
221.19	-0.00621931	221.19	0.169027	221.19	0.283198
221.39	-0.00922337	221.39	0.172241	221.39	0.283041
221.6	-0.00802824	221.6	0.174145	221.6	0.286236
221.79	-0.00540686	221.79	0.170494	221.79	0.28319
221.99	-0.0064052	221.99	0.171499	221.99	0.283415
222.19	-0.00614079	222.19	0.173296	222.19	0.283675
222.39	-0.0087932	222.39	0.170978	222.39	0.28954
222.59	-0.00837137	222.59	0.176348	222.59	0.28197
222.79	-0.00525224	222.79	0.173777	222.79	0.286339
222.99	-0.00378379	222.99	0.171807	222.99	0.284644
223.19	-0.0071669	223.19	0.173158	223.19	0.288147
223.39	-0.0071401	223.39	0.173496	223.39	0.290511
223.59	-0.0084857	223.59	0.173406	223.59	0.290541
223.79	-0.00812026	223.79	0.176575	223.79	0.289348
223.99	-0.00857568	223.99	0.173722	223.99	0.290608
224.19	-0.00670997	224.19	0.177198	224.19	0.288478
224.39	-0.00706727	224.39	0.178542	224.39	0.288229
224.59	-0.00854028	224.59	0.173687	224.59	0.290106
224.79	-0.00720995	224.79	0.175728	224.79	0.295843
224.99	-0.00888716	224.99	0.178706	224.99	0.297709
225.19	-0.00776384	225.19	0.179705	225.19	0.290261
225.39	-0.00924493	225.39	0.179733	225.39	0.29388
225.6	-0.0094319	225.6	0.181332	225.6	0.293946
225.79	-0.0062501	225.79	0.178348	225.79	0.295732
225.99	-0.00977084	225.99	0.179711	225.99	0.294914
226.19	-0.00593111	226.19	0.179861	226.19	0.292562
226.39	-0.00682659	226.39	0.183909	226.39	0.296878
226.59	-0.00808162	226.59	0.182609	226.59	0.295369
226.79	-0.00740031	226.79	0.179545	226.79	0.294904
226.99	-0.0101316	226.99	0.181687	226.99	0.294219
227.19	-0.0079494	227.19	0.1823	227.19	0.297153
227.39	-0.00811175	227.39	0.183754	227.39	0.298168
227.6	-0.00840032	227.6	0.184738	227.6	0.298374
227.79	-0.00435418	227.79	0.185596	227.79	0.302929
227.99	-0.00992615	227.99	0.187875	227.99	0.298836
228.19	-0.00725026	228.19	0.183851	228.19	0.29887
228.39	-0.00264638	228.39	0.186175	228.39	0.303727
228.6	-0.0084848	228.6	0.184447	228.6	0.299989
228.79	-0.00632609	228.79	0.186341	228.79	0.30334
228.99	-0.00596144	228.99	0.186802	228.99	0.305083
229.19	-0.00303593	229.19	0.187579	229.19	0.302388
229.39	-0.00810781	229.39	0.190043	229.39	0.303453
229.6	-0.00872487	229.6	0.186451	229.6	0.306078
229.79	-0.00919052	229.79	0.188781	229.79	0.306134
229.99	-0.00676448	229.99	0.187293	229.99	0.306469
230.19	-0.00372368	230.19	0.187337	230.19	0.305405
230.39	-0.00633096	230.39	0.187424	230.39	0.303561
230.6	-0.00925245	230.6	0.192541	230.6	0.308545
230.79	-0.0073836	230.79	0.194522	230.79	0.307656
230.99	-0.00964743	230.99	0.190861	230.99	0.305388
231.19	-0.00615681	231.19	0.190741	231.19	0.30481
231.39	-0.00774767	231.39	0.19213	231.39	0.306247
231.59	-0.00667258	231.59	0.189887	231.59	0.309983
231.79	-0.00856354	231.79	0.190625	231.79	0.30795
231.99	-0.0090294	231.99	0.193843	231.99	0.309183
232.19	-0.00563184	232.19	0.194164	232.19	0.308491
232.39	-0.00592094	232.39	0.196443	232.39	0.312496
232.6	-0.00820092	232.6	0.195233	232.6	0.313261
232.79	-0.00944149	232.79	0.19288	232.79	0.313267
232.99	-0.00672422	232.99	0.194645	232.99	0.310367
233.19	-0.00394209	233.19	0.194564	233.19	0.312753
233.39	-0.00541289	233.39	0.196679	233.39	0.315157
233.6	-0.00723889	233.6	0.196736	233.6	0.315303
233.79	-0.00597591	233.79	0.199371	233.79	0.318258
233.99	-0.00706293	233.99	0.197476	233.99	0.319856
234.19	-0.00863075	234.19	0.196647	234.19	0.313362
234.39	-0.00877614	234.39	0.195223	234.39	0.313575
234.6	-0.00611159	234.6	0.203632	234.6	0.313103
234.79	-0.0100896	234.79	0.202148	234.79	0.316209
234.99	-0.00771019	234.99	0.198176	234.99	0.317261
235.19	-0.00727231	235.19	0.198777	235.19	0.315486
235.39	-0.00788101	235.39	0.201599	235.39	0.315914
235.6	-0.00839262	235.6	0.199061	235.6	0.321068
235.79	-0.00989844	235.79	0.204463	235.79	0.318488
235.99	-0.00606595	235.99	0.206167	235.99	0.318622
236.19	-0.00656045	236.19	0.201673	236.19	0.320199
236.39	-0.00560832	236.39	0.204302	236.39	0.321361
236.59	-0.00875667	236.59	0.203184	236.59	0.320346
236.79	-0.00713128	236.79	0.201709	236.79	0.320078
236.99	-0.0075318	236.99	0.203038	236.99	0.320387
237.19	-0.011756	237.19	0.205098	237.19	0.325825
237.39	-0.00698822	237.39	0.206825	237.39	0.324813
237.6	-0.0111462	237.6	0.208061	237.6	0.320998
237.79	-0.00859706	237.79	0.206828	237.79	0.325632
237.99	-0.00610713	237.99	0.208087	237.99	0.323739
238.19	-0.00763632	238.19	0.205033	238.19	0.326147
238.39	-0.00816255	238.39	0.207002	238.39	0.327047
238.6	-0.0118897	238.6	0.207012	238.6	0.323819
238.79	-0.00978937	238.79	0.208802	238.79	0.324598
238.99	-0.00614739	238.99	0.209662	238.99	0.328182
239.19	-0.00934861	239.19	0.207467	239.19	0.325846
239.39	-0.0128349	239.39	0.208346	239.39	0.328681
239.6	-0.00978002	239.6	0.208905	239.6	0.329078
239.79	-0.00913035	239.79	0.212136	239.79	0.329309
239.99	-0.00542695	239.99	0.209412	239.99	0.328659
240.19	-0.00869717	240.19	0.210261	240.19	0.327936
240.39	-0.00546998	240.39	0.209861	240.39	0.332004
240.59	-0.00329782	240.59	0.208969	240.59	0.331706
240.79	-0.00769221	240.79	0.211624	240.79	0.334714
240.99	-0.0110179	240.99	0.210447	240.99	0.331084
241.19	-0.00893389	241.19	0.211135	241.19	0.332683
241.39	-0.0100167	241.39	0.210677	241.39	0.334444
241.59	-0.00610663	241.59	0.212994	241.59	0.336856
241.79	-0.00775808	241.79	0.212953	241.79	0.336697
241.99	-0.00839096	241.99	0.215901	241.99	0.333021
242.19	-0.0121474	242.19	0.213422	242.19	0.334219
242.39	-0.00785677	242.39	0.215108	242.39	0.340964
242.59	-0.00792141	242.59	0.214078	242.59	0.336188
242.79	-0.00781877	242.79	0.21723	242.79	0.33521
242.99	-0.0105554	242.99	0.215264	242.99	0.33857
243.19	-0.00978895	243.19	0.21793	243.19	0.337489
243.39	-0.0103106	243.39	0.219032	243.39	0.3411
243.59	0.00034304	243.59	0.21725	243.59	0.33866
243.79	-0.004563	243.79	0.216679	243.79	0.340501
243.99	-0.00620848	243.99	0.219145	243.99	0.342381
244.19	-0.00654433	244.19	0.220403	244.19	0.343271
244.39	-0.00800881	244.39	0.222328	244.39	0.34115
244.59	-0.00872207	244.59	0.22242	244.59	0.34525
244.79	-0.00564987	244.79	0.218348	244.79	0.342766
244.99	-0.00906533	244.99	0.221021	244.99	0.348025
245.19	-0.00661324	245.19	0.2263	245.19	0.340281
245.39	-0.00635572	245.39	0.220619	245.39	0.343696
245.6	-0.00970826	245.6	0.222413	245.6	0.344031
245.79	-0.00838371	245.79	0.21963	245.79	0.344113
245.99	-0.00721917	245.99	0.221894	245.99	0.347937
246.19	-0.00758636	246.19	0.222545	246.19	0.34735
246.39	-0.0085347	246.39	0.225344	246.39	0.345585
246.6	-0.00656269	246.6	0.225248	246.6	0.347014
246.79	-0.00876524	246.79	0.226216	246.79	0.347013
246.99	-0.00978671	246.99	0.227271	246.99	0.347719
247.19	-0.00579635	247.19	0.224836	247.19	0.349907
247.39	-0.0070341	247.39	0.225492	247.39	0.348231
247.6	-0.00715709	247.6	0.228751	247.6	0.353124
247.79	-0.0081291	247.79	0.228795	247.79	0.351471
247.99	-0.0045248	247.99	0.226225	247.99	0.350686
248.19	-0.00840525	248.19	0.228517	248.19	0.353986
248.39	-0.00536888	248.39	0.225436	248.39	0.351472
248.59	-0.00692111	248.59	0.229224	248.59	0.351161
248.79	-0.00904661	248.79	0.23011	248.79	0.353088
248.99	-0.00774219	248.99	0.228142	248.99	0.353452
249.19	-0.00692219	249.19	0.231704	249.19	0.355959
249.39	-0.00673109	249.39	0.232809	249.39	0.356178
249.6	-0.00656137	249.6	0.23083	249.6	0.356939
249.79	-0.00538599	249.79	0.233854	249.79	0.35594
249.99	-0.00625367	249.99	0.231168	249.99	0.355386
250.19	-0.00823895	250.19	0.232566	250.19	0.358189
250.39	-0.0102509	250.39	0.231167	250.39	0.357287
250.6	-0.00438786	250.6	0.231963	250.6	0.358103
250.79	-0.00807714	250.79	0.234567	250.79	0.355724
250.99	-0.0112099	250.99	0.23526	250.99	0.358248
251.19	-0.00721596	251.19	0.236198	251.19	0.361192
251.39	-0.00704663	251.39	0.236825	251.39	0.359964
251.6	-0.00713013	251.6	0.236101	251.6	0.359778
251.79	-0.00756405	251.79	0.239102	251.79	0.356724
251.99	-0.00755143	251.99	0.237797	251.99	0.36273
252.19	-0.00722561	252.19	0.236345	252.19	0.358123
252.39	-0.00494917	252.39	0.235249	252.39	0.362028
252.6	-0.00857257	252.6	0.236017	252.6	0.360886
252.79	-0.00538477	252.79	0.237414	252.79	0.364423
252.99	-0.0078923	252.99	0.23541	252.99	0.368093
253.19	-0.00831822	253.19	0.23975	253.19	0.368036
253.39	-0.00598745	253.39	0.237714	253.39	0.365318
253.59	-0.0049664	253.59	0.237111	253.59	0.366232
253.79	-0.00617066	253.79	0.237755	253.79	0.367964
253.99	-0.00749106	253.99	0.241289	253.99	0.368233
254.19	-0.00538013	254.19	0.242841	254.19	0.368842
254.39	-0.00547966	254.39	0.243074	254.39	0.372297
254.6	-0.00815746	254.6	0.243319	254.6	0.362742
254.79	-0.00732936	254.79	0.239102	254.79	0.365936
254.99	-0.0053324	254.99	0.242411	254.99	0.367634
255.19	-0.00965648	255.19	0.244712	255.19	0.368897
255.39	-0.00788874	255.39	0.242054	255.39	0.366952
255.6	-0.00775966	255.6	0.242089	255.6	0.368053
255.79	-0.00951483	255.79	0.24375	255.79	0.374564
255.99	-0.00729746	255.99	0.246665	255.99	0.373836
256.2	-0.00851615	256.2	0.241466	256.2	0.374532
256.39	-0.00676846	256.39	0.248701	256.39	0.368367
256.6	-0.00939187	256.6	0.247576	256.6	0.37285
256.79	-0.00876585	256.79	0.24905	256.79	0.372714
256.99	-0.00850235	256.99	0.25128	256.99	0.375108
257.19	-0.00567179	257.19	0.247193	257.19	0.371403
257.39	-0.0067111	257.39	0.245608	257.39	0.375224
257.59	-0.0106751	257.59	0.247402	257.59	0.374045
257.79	-0.00712921	257.79	0.249464	257.79	0.377856
257.99	-0.00699301	257.99	0.248037	257.99	0.373884
258.2	-0.0105533	258.2	0.246536	258.2	0.378033
258.39	-0.0084822	258.39	0.250941	258.39	0.382634
258.59	-0.00798084	258.59	0.248444	258.59	0.37553
258.79	-0.00524501	258.79	0.25194	258.79	0.380599
258.99	-0.00832283	258.99	0.251514	258.99	0.380123
259.19	-0.00855985	259.19	0.2522	259.19	0.380832
259.39	-0.0085777	259.39	0.248574	259.39	0.37716
259.59	-0.00584414	259.59	0.252297	259.59	0.383978
259.79	-0.00676301	259.79	0.254421	259.79	0.384443
259.99	-0.010421	259.99	0.25191	259.99	0.385612
260.19	-0.00577766	260.19	0.253989	260.19	0.384179
260.39	-0.010335	260.39	0.25571	260.39	0.384744
260.6	-0.00605498	260.6	0.253237	260.6	0.384853
260.79	-0.00680543	260.79	0.258086	260.79	0.379582
260.99	-0.00932978	260.99	0.252587	260.99	0.388374
261.19	-0.00883857	261.19	0.257862	261.19	0.382962
261.39	-0.00708542	261.39	0.25892	261.39	0.384353
261.59	-0.00790571	261.59	0.254731	261.59	0.386724
261.79	-0.00829502	261.79	0.254988	261.79	0.386609
261.99	-0.00808413	261.99	0.257384	261.99	0.387121
262.19	-0.004892	262.19	0.256944	262.19	0.391129
262.39	-0.007088	262.39	0.259947	262.39	0.383556
262.59	-0.00648395	262.59	0.256968	262.59	0.390067
262.79	-0.00946544	262.79	0.261958	262.79	0.388843
262.99	-0.00724996	262.99	0.258851	262.99	0.388453
263.19	-0.00930668	263.19	0.259387	263.19	0.388821
263.39	-0.0120682	263.39	0.26053	263.39	0.38974
263.59	-0.0117691	263.59	0.262721	263.59	0.390226
263.79	-0.00573275	263.79	0.260096	263.79	0.394491
263.99	-0.00716821	263.99	0.264313	263.99	0.395122
264.19	-0.0103242	264.19	0.261941	264.19	0.393939
264.39	-0.00745495	264.39	0.26561	264.39	0.395258
264.6	-0.00703965	264.6	0.266168	264.6	0.393922
264.79	-0.0106924	264.79	0.264552	264.79	0.395298
264.99	-0.0095528	264.99	0.262943	264.99	0.393788
265.2	-0.00740877	265.2	0.263011	265.2	0.394692
265.39	-0.00743574	265.39	0.265036	265.39	0.398884
265.59	-0.00977493	265.59	0.265031	265.59	0.39861
265.79	-0.00882595	265.79	0.264489	265.79	0.39989
265.99	-0.00497839	265.99	0.267221	265.99	0.401828
266.2	-0.00585633	266.2	0.260927	266.2	0.397982
266.39	-0.00973439	266.39	0.268943	266.39	0.403365
266.59	-0.0079043	266.59	0.26696	266.59	0.404374
266.79	-0.00822346	266.79	0.268653	266.79	0.406632
266.99	-0.00712505	266.99	0.267856	266.99	0.404747
267.2	-0.00813459	267.2	0.268646	267.2	0.403274
267.39	-0.00707536	267.39	0.266618	267.39	0.400731
267.6	-0.00746317	267.6	0.267107	267.6	0.403269
267.79	-0.0102619	267.79	0.268953	267.79	0.39987
267.99	-0.00970697	267.99	0.273788	267.99	0.404446
268.19	-0.00675504	268.19	0.272731	268.19	0.405316
268.39	-0.00611587	268.39	0.27161	268.39	0.402846
268.6	-0.00580338	268.6	0.269728	268.6	0.402664
268.79	-0.00940155	268.79	0.274601	268.79	0.406044
268.99	-0.00777837	268.99	0.273214	268.99	0.404645
269.19	-0.00970548	269.19	0.276174	269.19	0.409801
269.39	-0.00773891	269.39	0.273458	269.39	0.410696
269.59	-0.00840326	269.59	0.274803	269.59	0.41513
269.79	-0.0100508	269.79	0.275389	269.79	0.407245
269.99	-0.0108565	269.99	0.276956	269.99	0.409263
270.2	-0.00765716	270.2	0.273012	270.2	0.414889
270.39	-0.00903315	270.39	0.277562	270.39	0.405938
270.59	-0.00995993	270.59	0.278618	270.59	0.41195
270.79	-0.00530655	270.79	0.280472	270.79	0.412597
270.99	-0.00831258	270.99	0.278783	270.99	0.40836
271.2	-0.00732057	271.2	0.276554	271.2	0.41519
271.39	-0.00930973	271.39	0.278949	271.39	0.40828
271.59	-0.00845856	271.59	0.279296	271.59	0.412186
271.79	-0.009712	271.79	0.27897	271.79	0.414502
271.99	-0.0079876	271.99	0.279651	271.99	0.416066
272.2	-0.0062607	272.2	0.27924	272.2	0.419044
272.39	-0.00858604	272.39	0.27926	272.39	0.414177
272.6	-0.00721183	272.6	0.280204	272.6	0.420174
272.79	-0.00925092	272.79	0.281087	272.79	0.415459
272.99	-0.00739239	272.99	0.28285	272.99	0.415216
273.2	-0.0113688	273.2	0.283984	273.2	0.420447
273.39	-0.0066426	273.39	0.281068	273.39	0.417
273.6	-0.00820539	273.6	0.282834	273.6	0.4188
273.79	-0.0112633	273.79	0.280755	273.79	0.422939
273.99	-0.00806192	273.99	0.284405	273.99	0.419591
274.19	-0.00871651	274.19	0.289441	274.19	0.420517
274.39	-0.00810611	274.39	0.283272	274.39	0.423777
274.59	-0.00751952	274.59	0.283903	274.59	0.424154
274.79	-0.0103181	274.79	0.285885	274.79	0.422483
274.99	-0.0081983	274.99	0.285696	274.99	0.421022
275.2	-0.00644897	275.2	0.290532	275.2	0.424976
275.39	-0.00917786	275.39	0.285222	275.39	0.428437
275.59	-0.0075963	275.59	0.289671	275.59	0.426416
275.79	-0.00805024	275.79	0.290662	275.79	0.423508
275.99	-0.00956507	275.99	0.290982	275.99	0.42649
276.19	-0.006276	276.19	0.289193	276.19	0.427139
276.39	-0.00776759	276.39	0.290252	276.39	0.422886
276.6	-0.00560195	276.6	0.287171	276.6	0.426909
276.79	-0.0114105	276.79	0.290234	276.79	0.428993
276.99	-0.00642714	276.99	0.293329	276.99	0.430173
277.19	-0.00798818	277.19	0.287375	277.19	0.425556
277.39	-0.00709461	277.39	0.291739	277.39	0.430314
277.6	-0.0112391	277.6	0.28988	277.6	0.429313
277.79	-0.00771481	277.79	0.295388	277.79	0.431672
277.99	-0.0116946	277.99	0.289177	277.99	0.431828
278.19	-0.00883241	278.19	0.290604	278.19	0.430406
278.39	-0.00941266	278.39	0.295596	278.39	0.435375
278.6	-0.00771218	278.6	0.294482	278.6	0.43569
278.79	-0.0109531	278.79	0.294464	278.79	0.436358
278.99	-0.00944127	278.99	0.295554	278.99	0.437291
279.19	-0.00777884	279.19	0.296972	279.19	0.433276
279.39	-0.0110251	279.39	0.295827	279.39	0.437478
279.59	-0.00811309	279.59	0.296961	279.59	0.434954
279.79	-0.00685621	279.79	0.299251	279.79	0.439656
279.99	-0.00981163	279.99	0.29702	279.99	0.437577
280.2	-0.0105685	280.2	0.296397	280.2	0.438061
280.39	-0.00849086	280.39	0.298679	280.39	0.440848
280.59	-0.00684148	280.59	0.29814	280.59	0.440914
280.79	-0.0117684	280.79	0.298284	280.79	0.44034
280.99	-0.00824767	280.99	0.300275	280.99	0.438429
281.19	-0.00862048	281.19	0.304299	281.19	0.440353
281.39	-0.0088149	281.39	0.303495	281.39	0.440253
281.6	-0.00867515	281.6	0.301842	281.6	0.440974
281.79	-0.00800527	281.79	0.299595	281.79	0.444848
281.99	-0.00805096	281.99	0.302331	281.99	0.440506
282.19	-0.00599078	282.19	0.304872	282.19	0.444039
282.39	-0.00799056	282.39	0.297064	282.39	0.441432
282.59	-0.010432	282.59	0.30359	282.59	0.443615
282.79	-0.00611535	282.79	0.304046	282.79	0.44857
282.99	-0.0046484	282.99	0.306306	282.99	0.445682
283.19	-0.0112723	283.19	0.30474	283.19	0.450978
283.39	-0.00794849	283.39	0.306892	283.39	0.449923
283.59	-0.00792977	283.59	0.30644	283.59	0.449167
283.79	-0.00979481	283.79	0.305224	283.79	0.449656
283.99	-0.00390174	283.99	0.305407	283.99	0.450629
284.2	-0.0112451	284.2	0.30793	284.2	0.449419
284.39	-0.00825377	284.39	0.311705	284.39	0.449048
284.6	-0.0077386	284.6	0.30902	284.6	0.445082
284.79	-0.00847629	284.79	0.307061	284.79	0.448074
284.99	-0.00859825	284.99	0.305073	284.99	0.450992
285.2	-0.0132975	285.2	0.309892	285.2	0.450489
285.39	-0.0114476	285.39	0.312526	285.39	0.450021
285.6	-0.00714204	285.6	0.310767	285.6	0.453481
285.79	-0.00996626	285.79	0.312032	285.79	0.454696
285.99	-0.0123254	285.99	0.311566	285.99	0.453501
286.2	-0.00897341	286.2	0.312758	286.2	0.456415
286.39	-0.00979857	286.39	0.309657	286.39	0.456968
286.6	-0.0100203	286.6	0.314488	286.6	0.457666
286.79	-0.0100322	286.79	0.313693	286.79	0.454652
286.99	-0.00884711	286.99	0.31504	286.99	0.454898
287.2	-0.00908097	287.2	0.312959	287.2	0.45554
287.39	-0.0091636	287.39	0.311368	287.39	0.458629
287.6	-0.00979233	287.6	0.312935	287.6	0.460865
287.79	-0.00701271	287.79	0.314479	287.79	0.461485
287.99	-0.00723615	287.99	0.317863	287.99	0.461171
288.2	-0.00518002	288.2	0.316673	288.2	0.461637
288.39	-0.00536984	288.39	0.318938	288.39	0.461404
288.59	-0.00961237	288.59	0.317272	288.59	0.458027
288.79	-0.00755222	288.79	0.317621	288.79	0.461299
288.99	-0.00843898	288.99	0.314424	288.99	0.462376
289.2	-0.0100541	289.2	0.319796	289.2	0.464436
289.39	-0.00832884	289.39	0.318224	289.39	0.464412
289.59	-0.00750413	289.59	0.31508	289.59	0.459884
289.79	-0.00770683	289.79	0.321108	289.79	0.465267
289.99	-0.0110756	289.99	0.322198	289.99	0.465067
290.2	-0.0102986	290.2	0.320508	290.2	0.469735
290.39	-0.00508887	290.39	0.319238	290.39	0.466393
290.6	-0.0060072	290.6	0.323323	290.6	0.471362
290.79	-0.00770539	290.79	0.319477	290.79	0.468336
290.99	-0.0052485	290.99	0.326273	290.99	0.467429
291.19	-0.00834376	291.19	0.323131	291.19	0.472153
291.39	-0.0105481	291.39	0.324531	291.39	0.468426
291.6	-0.00581495	291.6	0.324241	291.6	0.467523
291.79	-0.0107285	291.79	0.326166	291.79	0.470865
291.99	-0.00846908	291.99	0.322781	291.99	0.474266
292.2	-0.0097343	292.2	0.324297	292.2	0.47193
292.39	-0.00612152	292.39	0.324918	292.39	0.47196
292.6	-0.00802187	292.6	0.32647	292.6	0.473626
292.79	-0.00781809	292.79	0.326017	292.79	0.4733
292.99	-0.0122205	292.99	0.328453	292.99	0.474022
293.2	-0.00695349	293.2	0.332505	293.2	0.473726
293.39	-0.00830672	293.39	0.329079	293.39	0.476725
293.59	-0.008422	293.59	0.326724	293.59	0.472853
293.79	-0.0106834	293.79	0.32874	293.79	0.476916
293.99	-0.00853118	293.99	0.332769	293.99	0.475771
294.2	-0.00902681	294.2	0.3287	294.2	0.47996
294.39	-0.00968558	294.39	0.32934	294.39	0.479186
294.59	-0.00705779	294.59	0.331102	294.59	0.479654
294.79	-0.0085402	294.79	0.331364	294.79	0.478659
294.99	-0.00937124	294.99	0.335155	294.99	0.475032
295.19	-0.00608868	295.19	0.335269	295.19	0.480861
295.39	-0.0126277	295.39	0.332053	295.39	0.479271
295.6	-0.00829667	295.6	0.334778	295.6	0.484766
295.79	-0.00855679	295.79	0.334079	295.79	0.483576
295.99	-0.00776095	295.99	0.334259	295.99	0.485323
296.19	-0.00862404	296.19	0.333044	296.19	0.485571
296.39	-0.00896779	296.39	0.335105	296.39	0.479264
296.6	-0.00917699	296.6	0.336984	296.6	0.48224
296.79	-0.00825325	296.79	0.332688	296.79	0.483506
296.99	-0.00903495	296.99	0.335091	296.99	0.486799
297.2	-0.00625389	297.2	0.335764	297.2	0.488299
297.39	-0.0118771	297.39	0.338965	297.39	0.487594
297.6	-0.00892897	297.6	0.337923	297.6	0.486
297.79	-0.0104896	297.79	0.341308	297.79	0.486016
297.99	-0.00659609	297.99	0.337844	297.99	0.48972
298.19	-0.00785487	298.19	0.342351	298.19	0.487694
298.39	-0.00650107	298.39	0.339637	298.39	0.488316
298.59	-0.00785844	298.59	0.33876	298.59	0.493524
298.79	-0.00772855	298.79	0.343064	298.79	0.487567
298.99	-0.00898543	298.99	0.341895	298.99	0.489268
299.2	-0.00902263	299.2	0.344416	299.2	0.492311
299.39	-0.00924879	299.39	0.344499	299.39	0.492252
299.59	-0.010357	299.59	0.34042	299.59	0.493457
299.79	-0.0100732	299.79	0.342831	299.79	0.492854
299.99	-0.0100485	299.99	0.342253	299.99	0.48898
300.19	-0.00699351	300.19	0.345442	300.19	0.495312
300.39	-0.00908323	300.39	0.342024	300.39	0.492761
300.6	-0.00752535	300.6	0.343403	300.6	0.493694
300.79	-0.00928815	300.79	0.346959	300.79	0.497661
300.99	-0.00768268	300.99	0.347348	300.99	0.496176
301.19	-0.0104256	301.19	0.346053	301.19	0.49241
301.39	-0.010913	301.39	0.347937	301.39	0.499333
301.59	-0.0095764	301.59	0.346605	301.59	0.498527
301.79	-0.00851869	301.79	0.348748	301.79	0.501792
301.99	-0.0103182	301.99	0.346054	301.99	0.50134
302.19	-0.0107867	302.19	0.346889	302.19	0.500039
302.39	-0.00737841	302.39	0.350013	302.39	0.506223
302.59	-0.00908495	302.59	0.347812	302.59	0.499153
302.79	-0.00731428	302.79	0.354282	302.79	0.499333
302.99	-0.00847582	302.99	0.352543	302.99	0.502953
303.19	-0.0108859	303.19	0.352264	303.19	0.502206
303.39	-0.00932409	303.39	0.350747	303.39	0.504149
303.6	-0.00739909	303.6	0.352717	303.6	0.503927
303.79	-0.00724807	303.79	0.352763	303.79	0.503591
303.99	-0.00983579	303.99	0.351715	303.99	0.503756
304.2	-0.0131024	304.2	0.352172	304.2	0.505995
304.39	-0.0075022	304.39	0.352854	304.39	0.507702
304.6	-0.00979887	304.6	0.354242	304.6	0.505754
304.79	-0.0117909	304.79	0.352215	304.79	0.507189
304.99	-0.00838138	304.99	0.353494	304.99	0.511761
305.2	-0.011821	305.2	0.355364	305.2	0.507191
305.39	-0.00775052	305.39	0.356218	305.39	0.508126
305.59	-0.00965616	305.59	0.352651	305.59	0.50667
305.79	-0.00983163	305.79	0.356908	305.79	0.510948
305.99	-0.00952296	305.99	0.356639	305.99	0.512981
306.2	-0.0123745	306.2	0.35841	306.2	0.511905
306.39	-0.0119934	306.39	0.356453	306.39	0.515508
306.6	-0.0116022	306.6	0.357876	306.6	0.519178
306.79	-0.00886276	306.79	0.35955	306.79	0.51373
306.99	-0.00664612	306.99	0.359473	306.99	0.5144
307.19	-0.0103603	307.19	0.359836	307.19	0.518485
307.39	-0.00676467	307.39	0.359764	307.39	0.513738
307.6	-0.00944372	307.6	0.364206	307.6	0.517819
307.79	-0.0111687	307.79	0.361745	307.79	0.515862
307.99	-0.00832496	307.99	0.36465	307.99	0.520842
308.19	-0.0110317	308.19	0.362262	308.19	0.520511
308.39	-0.00756458	308.39	0.361876	308.39	0.523409
308.6	-0.00803336	308.6	0.363834	308.6	0.516079
308.79	-0.00867437	308.79	0.365266	308.79	0.518421
308.99	-0.0105526	308.99	0.363821	308.99	0.517672
309.19	-0.0100345	309.19	0.369685	309.19	0.519836
309.39	-0.00909132	309.39	0.36579	309.39	0.520979
309.6	-0.0112475	309.6	0.366799	309.6	0.518971
309.79	-0.00908731	309.79	0.367262	309.79	0.523082
309.99	-0.0108603	309.99	0.365782	309.99	0.524982
310.2	-0.00824819	310.2	0.366936	310.2	0.520726
310.39	-0.0118985	310.39	0.367623	310.39	0.52179
310.59	-0.0082462	310.59	0.36253	310.59	0.525366
310.79	-0.00838731	310.79	0.369438	310.79	0.524629
310.99	-0.010563	310.99	0.368615	310.99	0.526258
311.2	-0.0106856	311.2	0.372769	311.2	0.525364
311.39	-0.00891189	311.39	0.372149	311.39	0.52955
311.6	-0.00859222	311.6	0.369074	311.6	0.530089
311.79	-0.00661391	311.79	0.368626	311.79	0.530376
311.99	-0.0091674	311.99	0.369037	311.99	0.529816
312.19	-0.00668598	312.19	0.370935	312.19	0.529663
312.39	-0.0111401	312.39	0.370787	312.39	0.527063
312.6	-0.00522139	312.6	0.376579	312.6	0.526617
312.79	-0.00807178	312.79	0.3702	312.79	0.530549
312.99	-0.00830425	312.99	0.373581	312.99	0.52921
313.19	-0.00929512	313.19	0.373515	313.19	0.530477
313.39	-0.00791568	313.39	0.373979	313.39	0.529723
313.6	-0.0105155	313.6	0.375406	313.6	0.533452
313.79	-0.00425376	313.79	0.375764	313.79	0.531477
313.99	-0.00667603	313.99	0.376933	313.99	0.531905
314.2	-0.00919899	314.2	0.373486	314.2	0.537553
314.39	-0.00915943	314.39	0.375487	314.39	0.536453
314.6	-0.00950912	314.6	0.377889	314.6	0.539744
314.79	-0.00724541	314.79	0.3814	314.79	0.536385
314.99	-0.00968857	314.99	0.378627	314.99	0.537888
315.2	-0.0107582	315.2	0.381407	315.2	0.537944
315.39	-0.0135591	315.39	0.377731	315.39	0.538595
315.59	-0.0093003	315.59	0.376552	315.59	0.538892
315.79	-0.013268	315.79	0.378759	315.79	0.540434
315.99	-0.00745739	315.99	0.378968	315.99	0.541967
316.19	-0.0105055	316.19	0.381084	316.19	0.54289
316.39	-0.0121993	316.39	0.380278	316.39	0.541114
316.59	-0.00865691	316.59	0.37893	316.59	0.540627
316.79	-0.009088	316.79	0.383619	316.79	0.54084
316.99	-0.00771634	316.99	0.38384	316.99	0.544459
317.19	-0.0113501	317.19	0.384391	317.19	0.54115
317.39	-0.0091873	317.39	0.383206	317.39	0.545007
317.6	-0.0108045	317.6	0.384434	317.6	0.547843
317.79	-0.00814317	317.79	0.384446	317.79	0.546157
317.99	-0.00980742	317.99	0.381568	317.99	0.545255
318.19	-0.00783995	318.19	0.384736	318.19	0.547724
318.39	-0.0082043	318.39	0.390793	318.39	0.544662
318.6	-0.00688966	318.6	0.388336	318.6	0.548749
318.79	-0.00932575	318.79	0.388509	318.79	0.549062
318.99	-0.0115726	318.99	0.389893	318.99	0.550809
319.2	-0.0109313	319.2	0.385196	319.2	0.553162
319.39	-0.0110679	319.39	0.390024	319.39	0.550017
319.6	-0.00986007	319.6	0.391034	319.6	0.554661
319.79	-0.0130784	319.79	0.386676	319.79	0.548466
319.99	-0.00833449	319.99	0.391422	319.99	0.552182
320.19	-0.0110276	320.19	0.38982	320.19	0.553881
320.39	-0.00941551	320.39	0.391383	320.39	0.554488
320.59	-0.011439	320.59	0.39199	320.59	0.554827
320.79	-0.00673095	320.79	0.390374	320.79	0.551572
320.99	-0.0115628	320.99	0.395066	320.99	0.553348
321.19	-0.00722888	321.19	0.393109	321.19	0.555116
321.39	-0.0114044	321.39	0.395245	321.39	0.554614
321.59	-0.00854507	321.59	0.394011	321.59	0.559396
321.79	-0.00966991	321.79	0.392497	321.79	0.557583
321.99	-0.00948454	321.99	0.396064	321.99	0.559227
322.19	-0.0105097	322.19	0.395331	322.19	0.557183
322.39	-0.0083813	322.39	0.396445	322.39	0.558595
322.59	-0.00903864	322.59	0.396625	322.59	0.559916
322.79	-0.00646232	322.79	0.397165	322.79	0.561525
322.99	-0.00840397	322.99	0.396975	322.99	0.558266
323.2	-0.0133611	323.2	0.399467	323.2	0.563865
323.39	-0.0113469	323.39	0.400771	323.39	0.562464
323.6	-0.00910221	323.6	0.396983	323.6	0.561736
323.79	-0.00721717	323.79	0.395122	323.79	0.564812
323.99	-0.0108067	323.99	0.398878	323.99	0.566976
324.2	-0.00828659	324.2	0.399748	324.2	0.56276
324.39	-0.0126541	324.39	0.400777	324.39	0.56676
324.6	-0.011083	324.6	0.400121	324.6	0.565186
324.79	-0.0112609	324.79	0.40064	324.79	0.567709
324.99	-0.0104685	324.99	0.403425	324.99	0.564885
325.2	-0.00889297	325.2	0.40211	325.2	0.56895
325.39	-0.00921397	325.39	0.403119	325.39	0.564563
325.6	-0.0111248	325.6	0.40104	325.6	0.569888
325.79	-0.00768958	325.79	0.399661	325.79	0.569527
325.99	-0.00986923	325.99	0.402733	325.99	0.568679
326.2	-0.0109773	326.2	0.407432	326.2	0.572033
326.39	-0.00929783	326.39	0.405743	326.39	0.569111
326.6	-0.0108108	326.6	0.40975	326.6	0.573484
326.79	-0.0122787	326.79	0.405407	326.79	0.575425
326.99	-0.0082963	326.99	0.408066	326.99	0.575524
327.2	-0.0112583	327.2	0.406002	327.2	0.572901
327.39	-0.0080975	327.39	0.409077	327.39	0.572014
327.59	-0.00937463	327.59	0.410276	327.59	0.578159
327.79	-0.00827225	327.79	0.41247	327.79	0.576138
327.99	-0.0123795	327.99	0.408021	327.99	0.575049
328.2	-0.0111824	328.2	0.406622	328.2	0.578673
328.39	-0.00998309	328.39	0.407635	328.39	0.581471
328.59	-0.0085677	328.59	0.409529	328.59	0.574933
328.79	-0.0101265	328.79	0.414258	328.79	0.578611
328.99	-0.010167	328.99	0.41562	328.99	0.575651
329.2	-0.0133825	329.2	0.410661	329.2	0.577246
329.39	-0.0102866	329.39	0.411014	329.39	0.575945
329.6	-0.00736074	329.6	0.41175	329.6	0.580858
329.79	-0.0114385	329.79	0.41379	329.79	0.579984
329.99	-0.00842612	329.99	0.414436	329.99	0.582087
330.2	-0.00771923	330.2	0.413323	330.2	0.580543
330.39	-0.010657	330.39	0.412677	330.39	0.580623
330.6	-0.0109326	330.6	0.416063	330.6	0.587677
330.79	-0.010119	330.79	0.414286	330.79	0.583284
330.99	-0.0100753	330.99	0.418541	330.99	0.583965
331.19	-0.0121551	331.19	0.414864	331.19	0.584148
331.39	-0.0104111	331.39	0.419807	331.39	0.589156
331.6	-0.0124552	331.6	0.419381	331.6	0.585998
331.79	-0.0114121	331.79	0.41665	331.79	0.586039
331.99	-0.00949396	331.99	0.417735	331.99	0.587057
332.19	-0.0145223	332.19	0.420137	332.19	0.589492
332.39	-0.0114859	332.39	0.417687	332.39	0.591332
332.59	-0.0136684	332.59	0.419458	332.59	0.591952
332.79	-0.00770818	332.79	0.418349	332.79	0.587098
332.99	-0.00809058	332.99	0.419536	332.99	0.593867
333.2	-0.0107301	333.2	0.421818	333.2	0.591056
333.39	-0.0101893	333.39	0.423524	333.39	0.592725
333.59	-0.0111524	333.59	0.421916	333.59	0.589087
333.79	-0.0100341	333.79	0.421121	333.79	0.593111
333.99	-0.0111566	333.99	0.422579	333.99	0.590896
334.19	-0.0111785	334.19	0.427584	334.19	0.5949
334.39	-0.0104377	334.39	0.423858	334.39	0.599021
334.6	-0.010841	334.6	0.422991	334.6	0.597009
334.79	-0.0109401	334.79	0.425959	334.79	0.599498
334.99	-0.0105895	334.99	0.426458	334.99	0.599695
335.19	-0.00829569	335.19	0.43023	335.19	0.597938
335.39	-0.0127497	335.39	0.430185	335.39	0.592754
335.6	-0.00861516	335.6	0.425723	335.6	0.601202
335.79	-0.0105317	335.79	0.431341	335.79	0.6042
335.99	-0.0126904	335.99	0.43006	335.99	0.600262
336.19	-0.00853889	336.19	0.427716	336.19	0.598468
336.39	-0.00817569	336.39	0.431101	336.39	0.603173
336.59	-0.0129343	336.59	0.431396	336.59	0.600137
336.79	-0.0102238	336.79	0.428533	336.79	0.604577
336.99	-0.0109074	336.99	0.427965	336.99	0.604785
337.19	-0.0101097	337.19	0.424616	337.19	0.607593
337.39	-0.0106986	337.39	0.431747	337.39	0.603475
337.59	-0.009622	337.59	0.429024	337.59	0.605922
337.79	-0.00848291	337.79	0.433223	337.79	0.607403
337.99	-0.00972716	337.99	0.435724	337.99	0.609205
338.2	-0.0104947	338.2	0.436279	338.2	0.605602
338.39	-0.00925945	338.39	0.433325	338.39	0.60963
338.59	-0.0112638	338.59	0.433357	338.59	0.607728
338.79	-0.0133887	338.79	0.438414	338.79	0.606724
338.99	-0.00832296	338.99	0.43313	338.99	0.609665
339.19	-0.00999282	339.19	0.436982	339.19	0.607971
339.39	-0.0086933	339.39	0.436936	339.39	0.609348
339.6	-0.00899105	339.6	0.438261	339.6	0.610139
339.79	-0.0137441	339.79	0.439803	339.79	0.607946
339.99	-0.0118086	339.99	0.438718	339.99	0.614917
340.19	-0.00942094	340.19	0.437649	340.19	0.611748
340.39	-0.0135958	340.39	0.438846	340.39	0.611441
340.59	-0.00866825	340.59	0.43957	340.59	0.612231
340.79	-0.00984178	340.79	0.436529	340.79	0.616686
340.99	-0.0113446	340.99	0.438408	340.99	0.612308
341.19	-0.0111538	341.19	0.440993	341.19	0.613525
341.39	-0.0101068	341.39	0.440281	341.39	0.617951
341.59	-0.00993305	341.59	0.445643	341.59	0.614478
341.79	-0.0085231	341.79	0.44024	341.79	0.617406
341.99	-0.0105878	341.99	0.444374	341.99	0.617208
342.19	-0.00988454	342.19	0.439757	342.19	0.616583
342.39	-0.0123452	342.39	0.442555	342.39	0.618979
342.6	-0.00854643	342.6	0.447456	342.6	0.619821
342.79	-0.0113204	342.79	0.444207	342.79	0.619817
342.99	-0.00902794	342.99	0.442149	342.99	0.6191
343.2	-0.0103408	343.2	0.445995	343.2	0.618871
343.39	-0.010023	343.39	0.445141	343.39	0.623099
343.6	-0.0116781	343.6	0.446174	343.6	0.619865
343.79	-0.00841155	343.79	0.446118	343.79	0.620742
343.99	-0.007787	343.99	0.444844	343.99	0.622189
344.2	-0.0117261	344.2	0.451713	344.2	0.6254
344.39	-0.0122107	344.39	0.447575	344.39	0.6258
344.6	-0.00985009	344.6	0.448715	344.6	0.625966
344.79	-0.012493	344.79	0.447834	344.79	0.627453
344.99	-0.00714068	344.99	0.448833	344.99	0.625401
345.2	-0.00975816	345.2	0.451847	345.2	0.625535
345.39	-0.0106304	345.39	0.448875	345.39	0.626272
345.6	-0.0124475	345.6	0.453131	345.6	0.629211
345.79	-0.0118242	345.79	0.448984	345.79	0.631309
345.99	-0.0105973	345.99	0.448184	345.99	0.628232
346.2	-0.0104119	346.2	0.450975	346.2	0.630049
346.39	-0.00937023	346.39	0.456308	346.39	0.626953
346.59	-0.00714129	346.59	0.453696	346.59	0.63667
346.79	-0.0107996	346.79	0.451307	346.79	0.632756
346.99	-0.0066114	346.99	0.454789	346.99	0.636161
347.2	-0.0127832	347.2	0.456415	347.2	0.633968
347.39	-0.011924	347.39	0.455296	347.39	0.635019
347.6	-0.0120698	347.6	0.454001	347.6	0.633082
347.79	-0.00945733	347.79	0.456509	347.79	0.632947
347.99	-0.00948671	347.99	0.460134	347.99	0.637234
348.19	-0.011247	348.19	0.458066	348.19	0.635633
348.39	-0.0139084	348.39	0.455356	348.39	0.636915
348.6	-0.00939271	348.6	0.462399	348.6	0.63799
348.79	-0.0111538	348.79	0.459333	348.79	0.63992
348.99	-0.0110972	348.99	0.460839	348.99	0.637811
349.2	-0.00952013	349.2	0.460091	349.2	0.640968
349.39	-0.010114	349.39	0.459197	349.39	0.640614
349.6	-0.00716481	349.6	0.461723	349.6	0.64181
349.79	-0.00902731	349.79	0.461702	349.79	0.642671
349.99	-0.0108999	349.99	0.459027	349.99	0.642829
350.2	-0.010707	350.2	0.457914	350.2	0.641517
350.39	-0.0103801	350.39	0.459782	350.39	0.64774
350.59	-0.0125193	350.59	0.463253	350.59	0.645009
350.79	-0.0122174	350.79	0.464705	350.79	0.642483
350.99	-0.0101248	350.99	0.465522	350.99	0.645711
351.2	-0.00585286	351.2	0.46151	351.2	0.642513
351.39	-0.00806113	351.39	0.464885	351.39	0.644847
351.59	-0.00975854	351.59	0.467758	351.59	0.64345
351.79	-0.00739103	351.79	0.467274	351.79	0.645608
351.99	-0.0121692	351.99	0.466167	351.99	0.650286
352.2	-0.00827127	352.2	0.464699	352.2	0.649146
352.39	-0.00948903	352.39	0.463676	352.39	0.652296
352.6	-0.0107746	352.6	0.465576	352.6	0.648759
352.79	-0.00803947	352.79	0.465438	352.79	0.646272
352.99	-0.00798543	352.99	0.470455	352.99	0.651404
353.19	-0.0119443	353.19	0.468013	353.19	0.64757
353.39	-0.0124274	353.39	0.469927	353.39	0.656602
353.6	-0.00976516	353.6	0.467634	353.6	0.65375
353.79	-0.00942733	353.79	0.470646	353.79	0.65167
353.99	-0.00946905	353.99	0.471439	353.99	0.655633
354.2	-0.0101811	354.2	0.471322	354.2	0.655738
354.39	-0.00550304	354.39	0.476677	354.39	0.656573
354.6	-0.0111217	354.6	0.4722	354.6	0.653278
354.79	-0.00986697	354.79	0.472113	354.79	0.658164
354.99	-0.0120332	354.99	0.470136	354.99	0.657529
355.2	-0.00985607	355.2	0.473859	355.2	0.655745
355.39	-0.00710886	355.39	0.475441	355.39	0.66114
355.59	-0.00991849	355.59	0.47441	355.59	0.65473
355.79	-0.00931896	355.79	0.474325	355.79	0.660798
355.99	-0.00943473	355.99	0.47499	355.99	0.659406
356.2	-0.00768117	356.2	0.475671	356.2	0.660742
356.39	-0.00941317	356.39	0.477413	356.39	0.658602
356.59	-0.0107799	356.59	0.474952	356.59	0.664387
356.79	-0.0122996	356.79	0.475492	356.79	0.663636
356.99	-0.0104722	356.99	0.479263	356.99	0.664492
357.19	-0.00821443	357.19	0.481546	357.19	0.663123
357.39	-0.0126797	357.39	0.478345	357.39	0.667174
357.59	-0.00805096	357.59	0.478341	357.59	0.669742
357.79	-0.0134477	357.79	0.47948	357.79	0.665163
357.99	-0.00993769	357.99	0.479766	357.99	0.666921
358.19	-0.0101006	358.19	0.481906	358.19	0.662204
358.39	-0.0104529	358.39	0.480027	358.39	0.667111
358.59	-0.0097928	358.59	0.47983	358.59	0.667982
358.79	-0.0129441	358.79	0.479869	358.79	0.66899
358.99	-0.0112508	358.99	0.483571	358.99	0.667671
359.19	-0.00822293	359.19	0.481694	359.19	0.667879
359.39	-0.0106795	359.39	0.480989	359.39	0.672745
359.59	-0.0116309	359.59	0.485332	359.59	0.669182
359.79	-0.008418	359.79	0.483723	359.79	0.669585
359.99	-0.0122234	359.99	0.482015	359.99	0.668692
360.19	-0.0107017	360.19	0.486269	360.19	0.673363
360.39	-0.00845014	360.39	0.485498	360.39	0.675328
360.59	-0.01084	360.59	0.488338	360.59	0.673187
360.79	-0.0104245	360.79	0.485778	360.79	0.675443
360.99	-0.0106219	360.99	0.487577	360.99	0.673471
361.19	-0.00909121	361.19	0.487574	361.19	0.678587
361.39	-0.00962389	361.39	0.484979	361.39	0.679147
361.59	-0.0109	361.59	0.49003	361.59	0.676704
361.79	-0.0110785	361.79	0.490075	361.79	0.675996
361.99	-0.0102924	361.99	0.489305	361.99	0.673997
362.2	-0.0111918	362.2	0.494679	362.2	0.681033
362.39	-0.00634035	362.39	0.491444	362.39	0.674845
362.6	-0.00858274	362.6	0.489511	362.6	0.682182
362.79	-0.0119168	362.79	0.491476	362.79	0.681511
362.99	-0.00996385	362.99	0.494697	362.99	0.680592
363.2	-0.012037	363.2	0.492291	363.2	0.680953
363.39	-0.0090494	363.39	0.494624	363.39	0.679737
363.6	-0.00913534	363.6	0.494945	363.6	0.685398
363.79	-0.00954121	363.79	0.493306	363.79	0.685296
363.99	-0.0123531	363.99	0.492621	363.99	0.683326
364.2	-0.0127031	364.2	0.498953	364.2	0.690773
364.39	-0.0113458	364.39	0.495337	364.39	0.690769
364.6	-0.00909799	364.6	0.496792	364.6	0.688056
364.79	-0.00911999	364.79	0.498349	364.79	0.686767
364.99	-0.00911113	364.99	0.495528	364.99	0.683343
365.19	-0.00980927	365.19	0.499765	365.19	0.692606
365.39	-0.0116726	365.39	0.497693	365.39	0.691376
365.6	-0.0133763	365.6	0.501431	365.6	0.684699
365.79	-0.0107036	365.79	0.497691	365.79	0.686503
365.99	-0.0139111	365.99	0.499254	365.99	0.691645
366.19	-0.0104405	366.19	0.499575	366.19	0.6909
366.39	-0.0077934	366.39	0.500031	366.39	0.69707
366.6	-0.00996858	366.6	0.503134	366.6	0.692666
366.79	-0.0101279	366.79	0.501878	366.79	0.694165
366.99	-0.00903836	366.99	0.50068	366.99	0.69441
367.2	-0.0104091	367.2	0.50227	367.2	0.694623
367.39	-0.00984637	367.39	0.503362	367.39	0.69999
367.59	-0.0125571	367.59	0.502189	367.59	0.694022
367.79	-0.00818117	367.79	0.50775	367.79	0.695753
367.99	-0.00777311	367.99	0.504165	367.99	0.695478
368.2	-0.00946296	368.2	0.505018	368.2	0.69789
368.39	-0.0106586	368.39	0.506249	368.39	0.701868
368.59	-0.0124474	368.59	0.505243	368.59	0.695866
368.79	-0.0128243	368.79	0.506213	368.79	0.695521
368.99	-0.0100658	368.99	0.506618	368.99	0.705313
369.19	-0.00988884	369.19	0.509547	369.19	0.698383
369.39	-0.0117202	369.39	0.505832	369.39	0.704256
369.6	-0.0112442	369.6	0.509654	369.6	0.701726
369.79	-0.014585	369.79	0.51172	369.79	0.704926
369.99	-0.0119192	369.99	0.508824	369.99	0.704403
370.19	-0.0112072	370.19	0.510042	370.19	0.703815
370.39	-0.0105969	370.39	0.511314	370.39	0.704576
370.6	-0.00947462	370.6	0.51002	370.6	0.705593
370.79	-0.0100755	370.79	0.509388	370.79	0.70277
370.99	-0.0100538	370.99	0.512365	370.99	0.706957
371.19	-0.00886211	371.19	0.509423	371.19	0.704821
371.39	-0.0098565	371.39	0.510631	371.39	0.705293
371.6	-0.0112283	371.6	0.512118	371.6	0.710713
371.79	-0.0106325	371.79	0.511455	371.79	0.708774
371.99	-0.00725184	371.99	0.514035	371.99	0.71058
372.2	-0.0104175	372.2	0.515627	372.2	0.710863
372.39	-0.00866059	372.39	0.510914	372.39	0.708424
372.59	-0.00948002	372.59	0.517177	372.59	0.708658
372.79	-0.0109094	372.79	0.515891	372.79	0.707966
372.99	-0.0106399	372.99	0.516401	372.99	0.713861
373.2	-0.0088825	373.2	0.520553	373.2	0.716222
373.39	-0.0122006	373.39	0.519237	373.39	0.71051
373.59	-0.0111975	373.59	0.519618	373.59	0.717994
373.79	-0.00996915	373.79	0.517633	373.79	0.714383
373.99	-0.00789429	373.99	0.519462	373.99	0.715595
374.2	-0.00879612	374.2	0.515843	374.2	0.713468
374.39	-0.00843992	374.39	0.519324	374.39	0.714255
374.6	-0.0117465	374.6	0.519452	374.6	0.714988
374.79	-0.0086251	374.79	0.520667	374.79	0.716963
374.99	-0.0103419	374.99	0.522421	374.99	0.719605
375.19	-0.0086002	375.19	0.522146	375.19	0.717669
375.39	-0.0102056	375.39	0.522411	375.39	0.721112
375.59	-0.0125778	375.59	0.521436	375.59	0.716207
375.79	-0.0109486	375.79	0.523353	375.79	0.718431
375.99	-0.0100686	375.99	0.521772	375.99	0.722698
376.19	-0.0130903	376.19	0.524184	376.19	0.721085
376.39	-0.0101854	376.39	0.52501	376.39	0.723895
376.59	-0.00930645	376.59	0.526166	376.59	0.719536
376.79	-0.0115293	376.79	0.524537	376.79	0.725679
376.99	-0.0094308	376.99	0.524342	376.99	0.723694
377.2	-0.0116908	377.2	0.529496	377.2	0.724511
377.39	-0.00756759	377.39	0.526558	377.39	0.723756
377.59	-0.00978628	377.59	0.528915	377.59	0.725728
377.79	-0.0115912	377.79	0.531944	377.79	0.727694
377.99	-0.0123129	377.99	0.529701	377.99	0.725602
378.2	-0.00832805	378.2	0.52855	378.2	0.729612
378.39	-0.0105731	378.39	0.531723	378.39	0.72938
378.59	-0.0120487	378.59	0.530625	378.59	0.726946
378.79	-0.0117457	378.79	0.530478	378.79	0.731026
378.99	-0.00935969	378.99	0.531496	378.99	0.729722
379.2	-0.0105562	379.2	0.530015	379.2	0.729187
379.39	-0.0110979	379.39	0.531274	379.39	0.732488
379.59	-0.0101396	379.59	0.528636	379.59	0.732252
379.79	-0.0126898	379.79	0.5349	379.79	0.733339
379.99	-0.0100594	379.99	0.534508	379.99	0.730279
380.19	-0.0117611	380.19	0.53116	380.19	0.734142
380.39	-0.0117854	380.39	0.533458	380.39	0.736104
380.59	-0.00745127	380.59	0.535611	380.59	0.734579
380.79	-0.00825389	380.79	0.533565	380.79	0.734141
380.99	-0.0145617	380.99	0.533565	380.99	0.737343
381.19	-0.00911992	381.19	0.534697	381.19	0.737505
381.39	-0.0114445	381.39	0.535967	381.39	0.738511
381.6	-0.0102321	381.6	0.53902	381.6	0.737515
381.79	-0.00989271	381.79	0.534287	381.79	0.737245
381.99	-0.00866237	381.99	0.539045	381.99	0.738573
382.2	-0.0100926	382.2	0.536951	382.2	0.74198
382.39	-0.0121945	382.39	0.540045	382.39	0.741202
382.6	-0.0105036	382.6	0.543523	382.6	0.742228
382.79	-0.0127093	382.79	0.540108	382.79	0.742295
382.99	-0.00876229	382.99	0.540714	382.99	0.740236
383.19	-0.00904303	383.19	0.538417	383.19	0.744053
383.39	-0.00762564	383.39	0.539927	383.39	0.744551
383.6	-0.00748119	383.6	0.540611	383.6	0.744799
383.79	-0.00768312	383.79	0.540469	383.79	0.741237
383.99	-0.0100517	383.99	0.538256	383.99	0.74521
384.19	-0.0124857	384.19	0.544593	384.19	0.743193
384.39	-0.0153349	384.39	0.544348	384.39	0.744933
384.6	-0.011712	384.6	0.541836	384.6	0.747899
384.79	-0.0103973	384.79	0.545155	384.79	0.748848
384.99	-0.0115259	384.99	0.543349	384.99	0.744897
385.2	-0.0121865	385.2	0.544791	385.2	0.753779
385.39	-0.0116118	385.39	0.545625	385.39	0.755098
385.6	-0.0114684	385.6	0.545609	385.6	0.751061
385.79	-0.00910958	385.79	0.543688	385.79	0.75104
385.99	-0.0109088	385.99	0.544538	385.99	0.751251
386.2	-0.0118198	386.2	0.545712	386.2	0.751669
386.39	-0.010752	386.39	0.548102	386.39	0.749805
386.6	-0.00868118	386.6	0.548859	386.6	0.749798
386.79	-0.0135031	386.79	0.551732	386.79	0.749994
386.99	-0.00852194	386.99	0.549978	386.99	0.755528
387.2	-0.0107447	387.2	0.550327	387.2	0.752608
387.39	-0.010891	387.39	0.552532	387.39	0.753289
387.6	-0.0105894	387.6	0.554743	387.6	0.755581
387.79	-0.00971631	387.79	0.548997	387.79	0.756888
387.99	-0.0168015	387.99	0.551049	387.99	0.756018
388.19	-0.0126159	388.19	0.550983	388.19	0.753233
388.39	-0.0100036	388.39	0.554284	388.39	0.759212
388.6	-0.00857666	388.6	0.552688	388.6	0.757043
388.79	-0.00834067	388.79	0.552223	388.79	0.761669
388.99	-0.00921847	388.99	0.554403	388.99	0.763151
389.19	-0.0120672	389.19	0.556211	389.19	0.762029
389.39	-0.0124467	389.39	0.557844	389.39	0.765362
389.59	-0.0135106	389.59	0.555457	389.59	0.763945
389.79	-0.0113868	389.79	0.553045	389.79	0.765523
389.99	-0.0100745	389.99	0.5566	389.99	0.765784
390.2	-0.0155119	390.2	0.558749	390.2	0.765584
390.39	-0.00709914	390.39	0.559339	390.39	0.766098
390.6	-0.00821719	390.6	0.559755	390.6	0.764396
390.79	-0.0112535	390.79	0.562159	390.79	0.76601
390.99	-0.008433	390.99	0.557949	390.99	0.76786
391.2	-0.0124307	391.2	0.561138	391.2	0.769516
391.39	-0.0113585	391.39	0.560717	391.39	0.76559
391.6	-0.01195	391.6	0.561488	391.6	0.769071
391.79	-0.0117588	391.79	0.560384	391.79	0.766155
391.99	-0.0119639	391.99	0.562347	391.99	0.770774
392.2	-0.00873456	392.2	0.564111	392.2	0.766879
392.39	-0.00982005	392.39	0.559061	392.39	0.774577
392.6	-0.00876009	392.6	0.563502	392.6	0.769803
392.79	-0.00993118	392.79	0.563335	392.79	0.773144
392.99	-0.0129123	392.99	0.567012	392.99	0.773046
393.19	-0.0102872	393.19	0.563226	393.19	0.771404
393.39	-0.0112622	393.39	0.567142	393.39	0.773059
393.59	-0.0082136	393.59	0.564225	393.59	0.770651
393.79	-0.012654	393.79	0.567448	393.79	0.775432
393.99	-0.0107691	393.99	0.564083	393.99	0.776037
394.19	-0.0141539	394.19	0.566958	394.19	0.779545
394.39	-0.0123867	394.39	0.570307	394.39	0.77801
394.59	-0.0105162	394.59	0.567956	394.59	0.777495
394.79	-0.0122222	394.79	0.568673	394.79	0.778369
394.99	-0.00995423	394.99	0.572017	394.99	0.777871
395.2	-0.0134059	395.2	0.569133	395.2	0.778732
395.39	-0.0119256	395.39	0.573374	395.39	0.77827
395.59	-0.0112103	395.59	0.564257	395.59	0.780288
395.79	-0.00726341	395.79	0.573198	395.79	0.78133
395.99	-0.0119466	395.99	0.569636	395.99	0.782496
396.2	-0.00998572	396.2	0.57229	396.2	0.77997
396.39	-0.0106796	396.39	0.569557	396.39	0.785624
396.59	-0.00928851	396.59	0.572515	396.59	0.78067
396.79	-0.0120507	396.79	0.571727	396.79	0.782994
396.99	-0.0119231	396.99	0.572129	396.99	0.786782
397.19	-0.0121861	397.19	0.573545	397.19	0.784229
397.39	-0.0115622	397.39	0.575939	397.39	0.786561
397.59	-0.0120081	397.59	0.575756	397.59	0.785516
397.79	-0.00824982	397.79	0.578695	397.79	0.782834
397.99	-0.0101216	397.99	0.578673	397.99	0.781759
398.19	-0.0115134	398.19	0.577582	398.19	0.786295
398.39	-0.0125159	398.39	0.575621	398.39	0.788424
398.59	-0.0107351	398.59	0.574055	398.59	0.789856
398.79	-0.010037	398.79	0.578044	398.79	0.792179
398.99	-0.00931414	398.99	0.578228	398.99	0.792927
[truncated: 24,727 more rows]
