# Supplementary material for: Unstructured regions in IRE1α specify BiP-mediated destabilisation of the luminal domain dimer and repression of the UPR
Source: eLife. 2019 Dec 24;8:e50793. doi: 10.7554/eLife.50793 (PMC6996924; doi:10.7554/eLife.50793)
Supplement: Figure 5—figure supplement 1—source data 2. [file elife-50793-fig5-figsupp1-data2.xlsx]

## Sheet: titration 2076-TMR IRE1 wt TMR
run 81				run 80				run 79				run 78				run 77				run 76				run 75				run 74				run 73				run 72				run 71
0.15 uM IRE1 wt TMR				0.2 uM IRE1 wt TMR				0.25 uM IRE1 wt TMR				0.35 uM IRE1 wt TMR				0.5 uM IRE1 wt TMR				0.75 uM IRE1 wt TMR				1 uM IRE1 wt TMR				1.5 uM IRE1 wt TMR				2 uM IRE1 wt TMR				2.5 uM IRE1 wt TMR				3.5 uM IRE1 wt TMR
Time	Signal (TAM fluorescence)			Time	Signal (TAM fluorescence)			Time	Signal (TAM fluorescence)			Time	Signal (TAM fluorescence)			Time	Signal (TAM fluorescence)			Time	Signal (TAM fluorescence)			Time	Signal (TAM fluorescence)			Time	Signal (TAM fluorescence)			Time	Signal (TAM fluorescence)			Time	Signal (TAM fluorescence)			Time	Signal (TAM fluorescence)
		zeroed				zeroed				zeroed				zeroed				zeroed				zeroed				zeroed				zeroed				zeroed				zeroed				zeroed
0	4.19697	0		0	4.18246	0		0	4.16977	0		0	4.18405	0		0	4.18952	0		0	4.17994	0		0	4.15069	0		0	4.19094	0		0	4.1832	0		0	4.18638	0		0	4.24106	0
0.00720005	4.1983	0.00132918		0.00720005	4.18354	0.00107884		0.00720005	4.17385	0.00407696		0.00720005	4.18445	0.000399351		0.00720005	4.19149	0.00196695		0.00720005	4.18037	0.000423193		0.00720005	4.14912	-0.00157356		0.00720005	4.19208	0.00113845		0.00720005	4.18258	-0.000619888		0.00720005	4.18426	-0.00211596		0.00720005	4.24292	0.00186563
0.0144001	4.1984	0.00142455		0.0144001	4.18429	0.00182986		0.0144001	4.1785	0.00873208		0.0144001	4.18462	0.000566244		0.0144001	4.19289	0.00336766		0.0144001	4.1805	0.000560284		0.0144001	4.14816	-0.00252724		0.0144001	4.19294	0.00200272		0.0144001	4.18198	-0.0012219		0.0144001	4.18333	-0.00305176		0.0144001	4.24551	0.00445843
0.0216001	4.19716	0.000184774		0.0216001	4.1844	0.00193119		0.0216001	4.18333	0.013566		0.0216001	4.18447	0.000417232		0.0216001	4.19373	0.00420809		0.0216001	4.18017	0.000226498		0.0216001	4.14796	-0.00272393		0.0216001	4.19355	0.00261068		0.0216001	4.1815	-0.00169873		0.0216001	4.1837	-0.00268221		0.0216001	4.24861	0.00755787
0.0288002	4.19463	-0.00234246		0.0288002	4.18375	0.0012815		0.0288002	4.18794	0.0181735		0.0288002	4.18385	-0.000202656		0.0288002	4.19416	0.00463724		0.0288002	4.17919	-0.000756979		0.0288002	4.14851	-0.00218153		0.0288002	4.19399	0.00305176		0.0288002	4.1811	-0.00209808		0.0288002	4.18525	-0.00113249		0.0288002	4.25194	0.0108838
0.0360002	4.19106	-0.00591278		0.0360002	4.18238	-8.34465e-05		0.0360002	4.19193	0.022161		0.0360002	4.18269	-0.00135899		0.0360002	4.19441	0.00488758		0.0360002	4.17752	-0.00242591		0.0360002	4.14967	-0.00101924		0.0360002	4.19441	0.00347495		0.0360002	4.18067	-0.0025332		0.0360002	4.18761	0.00122786		0.0360002	4.25524	0.0141799
0.0432003	4.18677	-0.0102043		0.0432003	4.18048	-0.00198483		0.0432003	4.19495	0.025177		0.0432003	4.18106	-0.00299215		0.0432003	4.19458	0.00506043		0.0432003	4.1753	-0.0046432		0.0432003	4.15121	0.000518561		0.0432003	4.19509	0.00414848		0.0432003	4.18006	-0.00314713		0.0432003	4.19026	0.00388026		0.0432003	4.25821	0.0171542
0.0504003	4.18209	-0.0148773		0.0504003	4.17832	-0.00414848		0.0504003	4.19671	0.0269413		0.0504003	4.17916	-0.00488758		0.0504003	4.19464	0.00512004		0.0504003	4.17279	-0.00715256		0.0504003	4.15281	0.00212193		0.0504003	4.19624	0.00530481		0.0504003	4.1792	-0.00400543		0.0504003	4.19276	0.0063777		0.0504003	4.2605	0.019449
0.0576004	4.1773	-0.0196695		0.0576004	4.1762	-0.00626445		0.0576004	4.1971	0.0273347		0.0576004	4.17734	-0.00670552		0.0576004	4.19446	0.00494123		0.0576004	4.17029	-0.00964999		0.0576004	4.15419	0.00349879		0.0576004	4.19805	0.00711083		0.0576004	4.1781	-0.00510216		0.0576004	4.19483	0.00844598		0.0576004	4.26182	0.0207663
0.0648004	4.17266	-0.0243127		0.0648004	4.17444	-0.00802875		0.0648004	4.19623	0.0264645		0.0648004	4.17587	-0.00818372		0.0648004	4.19397	0.00444651		0.0648004	4.16818	-0.01176		0.0648004	4.15509	0.00440478		0.0648004	4.20043	0.00948906		0.0648004	4.17683	-0.00637174		0.0648004	4.19641	0.0100255		0.0648004	4.26205	0.0209987
0.0720005	4.16845	-0.0285208		0.0720005	4.17317	-0.00929236		0.0720005	4.19437	0.0245988		0.0720005	4.17488	-0.00917316		0.0720005	4.19312	0.00360012		0.0720005	4.16685	-0.0130892		0.0720005	4.1554	0.00470877		0.0720005	4.20303	0.0120878		0.0720005	4.17559	-0.00761151		0.0720005	4.19753	0.0111461		0.0720005	4.2614	0.0203431
0.0792005	4.16504	-0.0319362		0.0792005	4.17233	-0.0101388		0.0792005	4.1919	0.0221312		0.0792005	4.17441	-0.00963807		0.0792005	4.19191	0.00238419		0.0792005	4.16663	-0.0133097		0.0792005	4.15511	0.0044167		0.0792005	4.20542	0.014478		0.0792005	4.17464	-0.00856519		0.0792005	4.19829	0.011909		0.0792005	4.26018	0.0191271
0.0864006	4.16273	-0.0342429		0.0864006	4.17175	-0.010711		0.0864006	4.18922	0.019449		0.0864006	4.17442	-0.00963211		0.0864006	4.19025	0.000733137		0.0864006	4.16759	-0.0123501		0.0864006	4.15437	0.00367761		0.0864006	4.20721	0.0162661		0.0864006	4.17427	-0.00892878		0.0864006	4.19882	0.0124395		0.0864006	4.25873	0.0176787
0.0936006	4.16168	-0.0352919		0.0936006	4.17129	-0.0111759		0.0936006	4.18665	0.016886		0.0936006	4.17474	-0.00931025		0.0936006	4.18811	-0.00141263		0.0936006	4.16953	-0.0104129		0.0936006	4.15351	0.00282526		0.0936006	4.20812	0.017184		0.0936006	4.1747	-0.00849962		0.0936006	4.1993	0.0129163		0.0936006	4.25731	0.0162542
0.100801	4.1619	-0.0350714		0.100801	4.17086	-0.011605		0.100801	4.18451	0.0147462		0.100801	4.17516	-0.00889301		0.100801	4.18561	-0.00391603		0.100801	4.17202	-0.00792146		0.100801	4.15291	0.00221729		0.100801	4.20799	0.0170529		0.100801	4.17591	-0.00729561		0.100801	4.19988	0.0135005		0.100801	4.25606	0.0150084
0.108001	4.1633	-0.0336766		0.108001	4.17045	-0.0120103		0.108001	4.18301	0.0132442		0.108001	4.17538	-0.00867248		0.108001	4.18298	-0.00653863		0.108001	4.17444	-0.00550151		0.108001	4.15288	0.00218749		0.108001	4.20676	0.0158191		0.108001	4.17766	-0.00554323		0.108001	4.20068	0.0142992		0.108001	4.25514	0.0140846
0.115201	4.16572	-0.0312507		0.115201	4.17011	-0.012356		0.115201	4.18221	0.0124454		0.115201	4.17518	-0.00886917		0.115201	4.18056	-0.00895858		0.115201	4.1762	-0.00374317		0.115201	4.15362	0.00293255		0.115201	4.20452	0.0135779		0.115201	4.17963	-0.00357032		0.115201	4.2016	0.0152171		0.115201	4.25457	0.0135183
0.122401	4.16898	-0.0279963		0.122401	4.16989	-0.0125766		0.122401	4.18202	0.0122547		0.122401	4.17449	-0.00955462		0.122401	4.17861	-0.0109136		0.122401	4.17682	-0.00312328		0.122401	4.15519	0.00450015		0.122401	4.20157	0.0106275		0.122401	4.18139	-0.00181794		0.122401	4.20238	0.0160038		0.122401	4.25428	0.0132263
0.129601	4.17277	-0.0241995		0.129601	4.16996	-0.0125051		0.129601	4.18224	0.0124693		0.129601	4.17343	-0.0106156		0.129601	4.17728	-0.0122428		0.129601	4.17614	-0.00380278		0.129601	4.1575	0.00681281		0.129601	4.19829	0.00734925		0.129601	4.18249	-0.000715256		0.129601	4.20276	0.0163794		0.129601	4.25413	0.0130713
0.136801	4.17668	-0.0202954		0.136801	4.17059	-0.0118732		0.136801	4.18257	0.0127971		0.136801	4.1722	-0.0118494		0.136801	4.17669	-0.0128329		0.136801	4.17438	-0.00556707		0.136801	4.16044	0.00975132		0.136801	4.19503	0.00409484		0.136801	4.18249	-0.000715256		0.136801	4.20261	0.0162303		0.136801	4.254	0.0129402
0.144001	4.18024	-0.016731		0.144001	4.17207	-0.0103891		0.144001	4.18273	0.012964		0.144001	4.17102	-0.0130296		0.144001	4.17689	-0.0126302		0.144001	4.17202	-0.00792742		0.144001	4.16383	0.0131369		0.144001	4.19199	0.001055		0.144001	4.18109	-0.00211		0.144001	4.20204	0.0156581		0.144001	4.2539	0.0128448
0.151201	4.18308	-0.0138879		0.151201	4.17452	-0.00793934		0.151201	4.18252	0.0127554		0.151201	4.17004	-0.0140131		0.151201	4.17778	-0.0117362		0.151201	4.16961	-0.0103354		0.151201	4.16747	0.0167847		0.151201	4.18922	-0.00172257		0.151201	4.17832	-0.00488758		0.151201	4.20127	0.0148892		0.151201	4.25394	0.0128806
0.158401	4.18499	-0.0119865		0.158401	4.17789	-0.00457764		0.158401	4.18186	0.0120938		0.158401	4.16927	-0.014782		0.158401	4.17911	-0.0104129		0.158401	4.16758	-0.012362		0.158401	4.17119	0.020504		0.158401	4.18671	-0.00422597		0.158401	4.1745	-0.00870228		0.158401	4.20051	0.0141323		0.158401	4.25424	0.0131845
0.165601	4.18586	-0.0111163		0.165601	4.18192	-0.000542402		0.165601	4.18082	0.0110567		0.165601	4.1687	-0.0153482		0.165601	4.18044	-0.00907779		0.165601	4.16623	-0.0137091		0.165601	4.17477	0.0240803		0.165601	4.18457	-0.00637174		0.165601	4.17017	-0.0130296		0.165601	4.19989	0.0135064		0.165601	4.25496	0.0138998
0.172801	4.18565	-0.0113249		0.172801	4.18634	0.0038743		0.172801	4.17957	0.009799		0.172801	4.1683	-0.0157535		0.172801	4.1814	-0.00812411		0.172801	4.16575	-0.0141919		0.172801	4.17796	0.0272691		0.172801	4.1829	-0.00804067		0.172801	4.16586	-0.017345		0.172801	4.19956	0.0131786		0.172801	4.25621	0.0151515
0.180001	4.18441	-0.0125647		0.180001	4.19074	0.00827909		0.180001	4.1782	0.00843406		0.180001	4.16796	-0.0160873		0.180001	4.18171	-0.00781417		0.180001	4.16616	-0.0137806		0.180001	4.1805	0.0298142		0.180001	4.18181	-0.00913143		0.180001	4.16198	-0.0212193		0.180001	4.19967	0.0132918		0.180001	4.25804	0.0169814
0.187201	4.1823	-0.0146747		0.187201	4.19469	0.0122249		0.187201	4.17679	0.00702143		0.187201	4.16753	-0.0165224		0.187201	4.18131	-0.00820756		0.187201	4.16729	-0.0126481		0.187201	4.18221	0.0315189		0.187201	4.18133	-0.00961423		0.187201	4.159	-0.0242054		0.187201	4.20031	0.0139296		0.187201	4.26028	0.0192225
0.194401	4.17958	-0.0173867		0.194401	4.19768	0.0152171		0.194401	4.17538	0.0056088		0.194401	4.16679	-0.0172615		0.194401	4.18032	-0.009197		0.194401	4.16878	-0.0111639		0.194401	4.18295	0.032264		0.194401	4.18147	-0.00946522		0.194401	4.15736	-0.0258386		0.194401	4.20135	0.0149727		0.194401	4.26259	0.0215352
0.201601	4.17663	-0.0203431		0.201601	4.19928	0.0168204		0.201601	4.174	0.00423193		0.201601	4.16556	-0.0184894		0.201601	4.17892	-0.0106037		0.201601	4.17024	-0.00969768		0.201601	4.18273	0.0320435		0.201601	4.18227	-0.00867248		0.201601	4.15751	-0.0256956		0.201601	4.20247	0.0160933		0.201601	4.26458	0.02352
0.208801	4.17377	-0.0232041		0.208801	4.19926	0.0167966		0.208801	4.17263	0.00286102		0.208801	4.16381	-0.0202417		0.208801	4.17737	-0.0121474		0.208801	4.17154	-0.00839829		0.208801	4.18154	0.0308514		0.208801	4.18369	-0.00725389		0.208801	4.15956	-0.0236452		0.208801	4.2033	0.0169158		0.208801	4.26589	0.0248373
0.216001	4.17124	-0.0257313		0.216001	4.19759	0.0151277		0.216001	4.17112	0.00134707		0.216001	4.16165	-0.0223994		0.216001	4.17604	-0.0134766		0.216001	4.17278	-0.00716448		0.216001	4.17945	0.0287592		0.216001	4.18559	-0.00534654		0.216001	4.16333	-0.0198722		0.216001	4.20358	0.0172019		0.216001	4.26637	0.0253141
0.223201	4.16918	-0.0277877		0.223201	4.1945	0.0120342		0.223201	4.16923	-0.000536442		0.223201	4.1593	-0.0247478		0.223201	4.17528	-0.0142455		0.223201	4.17413	-0.00581145		0.223201	4.17659	0.0258982		0.223201	4.18772	-0.00321865		0.223201	4.1684	-0.0147998		0.223201	4.20327	0.016892		0.223201	4.26592	0.0248671
0.230401	4.16764	-0.0293314		0.230401	4.19036	0.00789762		0.230401	4.16685	-0.00291467		0.230401	4.15703	-0.0270188		0.230401	4.17533	-0.0141919		0.230401	4.17573	-0.00420809		0.230401	4.17324	0.0225484		0.230401	4.18974	-0.00120401		0.230401	4.17427	-0.00892878		0.230401	4.20251	0.016129		0.230401	4.26459	0.0235379
0.237602	4.16653	-0.0304461		0.237602	4.18565	0.00318885		0.237602	4.16408	-0.00568628		0.237602	4.15511	-0.0289381		0.237602	4.17629	-0.0132263		0.237602	4.17762	-0.00231862		0.237602	4.16964	0.0189543		0.237602	4.19135	0.000411272		0.237602	4.18041	-0.0027895		0.237602	4.20153	0.0151455		0.237602	4.26254	0.0214815
0.244802	4.16573	-0.0312388		0.244802	4.18093	-0.00153184		0.244802	4.16121	-0.00855327		0.244802	4.15387	-0.0301778		0.244802	4.17805	-0.0114679		0.244802	4.17979	-0.000154972		0.244802	4.16601	0.0153184		0.244802	4.19243	0.00149012		0.244802	4.18623	0.00302792		0.244802	4.20065	0.0142694		0.244802	4.26004	0.0189841
0.252002	4.16515	-0.031817		0.252002	4.1767	-0.00576377		0.252002	4.15863	-0.0111401		0.252002	4.15363	-0.0304222		0.252002	4.18041	-0.00910759		0.252002	4.18221	0.00226498		0.252002	4.16241	0.0117242		0.252002	4.19298	0.00204444		0.252002	4.19108	0.00787973		0.252002	4.20028	0.0138998		0.252002	4.25746	0.0164032
0.259202	4.16475	-0.0322223		0.259202	4.17339	-0.00907779		0.259202	4.15664	-0.0131249		0.259202	4.15459	-0.0294626		0.259202	4.18317	-0.00635386		0.259202	4.18485	0.00490546		0.259202	4.15889	0.0082016		0.259202	4.19308	0.00213981		0.259202	4.19441	0.0112116		0.259202	4.20083	0.0144541		0.259202	4.25513	0.0140786
0.266402	4.16449	-0.0324786		0.266402	4.17125	-0.0112176		0.266402	4.15549	-0.0142753		0.266402	4.15663	-0.0274241		0.266402	4.18611	-0.00341535		0.266402	4.18761	0.00766516		0.266402	4.15551	0.00482202		0.266402	4.19281	0.00186563		0.266402	4.19595	0.0127494		0.266402	4.20256	0.0161767		0.266402	4.25333	0.0122786
0.273602	4.16435	-0.0326216		0.273602	4.17038	-0.0120819		0.273602	4.15538	-0.0143886		0.273602	4.15935	-0.0247002		0.273602	4.18904	-0.000476837		0.273602	4.19031	0.0103712		0.273602	4.15239	0.00169873		0.273602	4.19219	0.00124574		0.273602	4.19576	0.0125527		0.273602	4.20541	0.0190258		0.273602	4.25217	0.0111103
0.280802	4.16435	-0.0326216		0.280802	4.17072	-0.0117481		0.280802	4.15643	-0.0133395		0.280802	4.16224	-0.0218093		0.280802	4.19176	0.00224113		0.280802	4.1928	0.0128567		0.280802	4.14966	-0.0010252		0.280802	4.19123	0.000292063		0.280802	4.19425	0.0110507		0.280802	4.20901	0.0226319		0.280802	4.25166	0.0106037
0.288002	4.16458	-0.0323892		0.288002	4.17202	-0.0104427		0.288002	4.15864	-0.0111282		0.288002	4.16487	-0.0191808		0.288002	4.19401	0.00448823		0.288002	4.19495	0.0150084		0.288002	4.14751	-0.00317693		0.288002	4.18996	-0.000983477		0.288002	4.19196	0.00875592		0.288002	4.21277	0.026387		0.288002	4.25174	0.0106812
0.295202	4.16523	-0.0317454		0.295202	4.17397	-0.00849366		0.295202	4.16176	-0.00801086		0.295202	4.16697	-0.0170827		0.295202	4.19554	0.00602007		0.295202	4.19675	0.0168085		0.295202	4.14615	-0.00453591		0.295202	4.18845	-0.00249147		0.295202	4.18935	0.00614524		0.295202	4.21593	0.029552		0.295202	4.25231	0.0112593
0.302402	4.16641	-0.0305593		0.302402	4.17615	-0.00631213		0.302402	4.16534	-0.00442863		0.302402	4.16843	-0.0156164		0.302402	4.19621	0.00668764		0.302402	4.19819	0.018245		0.302402	4.14578	-0.00490546		0.302402	4.18675	-0.00419021		0.302402	4.18671	0.00351071		0.302402	4.21783	0.0314474		0.302402	4.25329	0.0122368
0.309602	4.16806	-0.0289083		0.309602	4.17818	-0.00428557		0.309602	4.16893	-0.000840425		0.309602	4.16927	-0.014776		0.309602	4.19595	0.00642538		0.309602	4.19924	0.019294		0.309602	4.14646	-0.00423193		0.309602	4.1849	-0.00604391		0.309602	4.1842	0.000995398		0.309602	4.21792	0.0315428		0.309602	4.25456	0.0135064
0.316802	4.16995	-0.0270247		0.316802	4.17975	-0.00271201		0.316802	4.17215	0.00237823		0.316802	4.16965	-0.0143945		0.316802	4.19475	0.00523329		0.316802	4.19977	0.0198305		0.316802	4.14808	-0.00260472		0.316802	4.18292	-0.00802279		0.316802	4.18187	-0.00132918		0.316802	4.21602	0.0296414		0.316802	4.25587	0.0148177
0.324002	4.17186	-0.0251114		0.324002	4.18071	-0.00175238		0.324002	4.17477	0.00500679		0.324002	4.16991	-0.0141382		0.324002	4.19269	0.00317097		0.324002	4.19965	0.0197053		0.324002	4.15047	-0.000214576		0.324002	4.18084	-0.010103		0.324002	4.17975	-0.00345707		0.324002	4.21228	0.0259042		0.324002	4.25692	0.0158668
0.331202	4.17373	-0.0232399		0.331202	4.18104	-0.00142455		0.331202	4.17665	0.00688434		0.331202	4.17047	-0.0135839		0.331202	4.18991	0.000393391		0.331202	4.19879	0.018847		0.331202	4.1534	0.00271201		0.331202	4.17876	-0.0121832		0.331202	4.17776	-0.0054419		0.331202	4.20721	0.0208318		0.331202	4.25744	0.0163853
0.338402	4.17559	-0.0213861		0.338402	4.18084	-0.00162125		0.338402	4.17762	0.00784993		0.338402	4.17164	-0.0124097		0.338402	4.18665	-0.00286698		0.338402	4.19731	0.0173688		0.338402	4.15665	0.00596047		0.338402	4.17681	-0.0141323		0.338402	4.17586	-0.00734329		0.338402	4.2015	0.0151217		0.338402	4.25723	0.0161707
0.345602	4.1774	-0.0195682		0.345602	4.18031	-0.00215769		0.345602	4.17755	0.00777841		0.345602	4.17348	-0.0105679		0.345602	4.1833	-0.00622272		0.345602	4.19546	0.0155151		0.345602	4.15994	0.00925064		0.345602	4.17507	-0.0158668		0.345602	4.17414	-0.00906587		0.345602	4.19583	0.00944734		0.345602	4.25621	0.0151575
0.352802	4.17913	-0.0178397		0.352802	4.17963	-0.00283122		0.352802	4.17646	0.00668764		0.352802	4.17575	-0.00829697		0.352802	4.18028	-0.00924468		0.352802	4.1935	0.0135541		0.352802	4.16297	0.0122845		0.352802	4.17353	-0.0174105		0.352802	4.17292	-0.0102818		0.352802	4.19073	0.00435114		0.352802	4.25437	0.0133157
0.360002	4.18074	-0.0162303		0.360002	4.17905	-0.00341535		0.360002	4.17452	0.00475049		0.360002	4.17809	-0.00596047		0.360002	4.17801	-0.0115156		0.360002	4.19163	0.0116825		0.360002	4.16552	0.0148356		0.360002	4.17205	-0.0188887		0.360002	4.17267	-0.0105321		0.360002	4.18655	0.000172853		0.360002	4.25166	0.0106096
0.367202	4.18234	-0.0146329		0.367202	4.17868	-0.00378489		0.367202	4.17198	0.00221133		0.367202	4.18009	-0.00395775		0.367202	4.17674	-0.0127792		0.367202	4.19	0.0100613		0.367202	4.16753	0.0168443		0.367202	4.17054	-0.0204027		0.367202	4.17376	-0.00944734		0.367202	4.1834	-0.00298023		0.367202	4.24818	0.00712276
0.374402	4.18403	-0.0129402		0.374402	4.17857	-0.00389814		0.374402	4.16909	-0.000673532		0.374402	4.1815	-0.00255108		0.374402	4.17657	-0.0129521		0.374402	4.18883	0.00888705		0.374402	4.16905	0.0183642		0.374402	4.16893	-0.022006		0.374402	4.17629	-0.00690818		0.374402	4.18119	-0.0051856		0.374402	4.24418	0.00312328
0.381602	4.18585	-0.0111222		0.381602	4.17866	-0.00380278		0.381602	4.16611	-0.00365973		0.381602	4.18211	-0.00194311		0.381602	4.17746	-0.012064		0.381602	4.18822	0.00827312		0.381602	4.17014	0.019455		0.381602	4.16734	-0.0236034		0.381602	4.18011	-0.00309348		0.381602	4.1797	-0.00667572		0.381602	4.24004	-0.00101924
0.388802	4.18764	-0.00933409		0.388802	4.17885	-0.003618		0.388802	4.16332	-0.00644326		0.388802	4.18184	-0.00220537		0.388802	4.17928	-0.0102401		0.388802	4.18809	0.00814795		0.388802	4.17074	0.020051		0.388802	4.16588	-0.0250638		0.388802	4.18477	0.0015676		0.388802	4.17869	-0.007689		0.388802	4.23611	-0.00494123
0.396003	4.18918	-0.00779033		0.396003	4.17903	-0.00343323		0.396003	4.16107	-0.00870228		0.396003	4.18074	-0.00331402		0.396003	4.1818	-0.0077188		0.396003	4.18817	0.0082314		0.396003	4.1707	0.0200152		0.396003	4.16463	-0.0263095		0.396003	4.18982	0.00661612		0.396003	4.17796	-0.00841618		0.396003	4.23265	-0.00840425
0.403203	4.19028	-0.00668764		0.403203	4.17919	-0.00327826		0.403203	4.15969	-0.0100732		0.403203	4.17899	-0.00506043		0.403203	4.18469	-0.00483394		0.403203	4.18815	0.00820756		0.403203	4.16991	0.0192165		0.403203	4.1636	-0.0273347		0.403203	4.19474	0.0115335		0.403203	4.17747	-0.00891089		0.403203	4.22986	-0.0111938
0.410403	4.19083	-0.00613928		0.410403	4.17935	-0.00311136		0.410403	4.1594	-0.0103712		0.410403	4.17689	-0.00715852		0.410403	4.1875	-0.0020206		0.410403	4.18789	0.0079453		0.410403	4.16835	0.0176609		0.410403	4.16281	-0.0281274		0.410403	4.19906	0.0158608		0.410403	4.17724	-0.00913739		0.410403	4.22791	-0.0131428
0.417603	4.19079	-0.006181		0.417603	4.17963	-0.00283718		0.417603	4.16017	-0.00960231		0.417603	4.1747	-0.00934601		0.417603	4.18982	0.000298023		0.417603	4.18748	0.00753403		0.417603	4.16615	0.0154614		0.417603	4.16228	-0.0286579		0.417603	4.20244	0.0192344		0.417603	4.17738	-0.0090003		0.417603	4.22691	-0.0141501
0.424803	4.19023	-0.00674128		0.424803	4.18012	-0.00234246		0.424803	4.1618	-0.00796914		0.424803	4.17259	-0.011456		0.424803	4.19134	0.0018239		0.424803	4.18713	0.00718832		0.424803	4.16347	0.0127792		0.424803	4.16212	-0.0288188		0.424803	4.20464	0.0214398		0.424803	4.17794	-0.00844002		0.424803	4.22684	-0.0142157
0.432003	4.18928	-0.007689		0.432003	4.18094	-0.00152588		0.432003	4.16402	-0.00575185		0.432003	4.17061	-0.0134408		0.432003	4.19195	0.00243187		0.432003	4.18702	0.00708103		0.432003	4.16049	0.009799		0.432003	4.16242	-0.0285149		0.432003	4.20572	0.0225186		0.432003	4.17895	-0.00742674		0.432003	4.2276	-0.0134528
0.439203	4.18814	-0.00882745		0.439203	4.18209	-0.000375509		0.439203	4.16655	-0.00321865		0.439203	4.16878	-0.0152707		0.439203	4.19165	0.00213385		0.439203	4.18721	0.00726581		0.439203	4.15745	0.00676513		0.439203	4.16321	-0.0277281		0.439203	4.20588	0.0226796		0.439203	4.18041	-0.00596642		0.439203	4.22905	-0.0120044
0.446403	4.18699	-0.00998378		0.446403	4.18345	0.000983477		0.446403	4.16917	-0.000596046		0.446403	4.16714	-0.0169098		0.446403	4.19051	0.000989437		0.446403	4.18773	0.00779033		0.446403	4.15469	0.00399947		0.446403	4.16445	-0.0264883		0.446403	4.20538	0.0221729		0.446403	4.1823	-0.00408292		0.446403	4.231	-0.0100553
0.453603	4.18593	-0.0110447		0.453603	4.18478	0.00231266		0.453603	4.17165	0.00188351		0.453603	4.1657	-0.0183523		0.453603	4.18863	-0.00089407		0.453603	4.1886	0.00865459		0.453603	4.15263	0.00194311		0.453603	4.1661	-0.0248432		0.453603	4.20442	0.0212133		0.453603	4.18456	-0.00181794		0.453603	4.23322	-0.00783801
0.460803	4.185	-0.0119746		0.460803	4.18577	0.0033021		0.460803	4.17377	0.00399947		0.460803	4.16441	-0.0196397		0.460803	4.18616	-0.0033617		0.460803	4.18971	0.00976324		0.460803	4.15168	0.000989437		0.460803	4.1681	-0.0228405		0.460803	4.20313	0.0199258		0.460803	4.18712	0.000739098		0.460803	4.23535	-0.00571012
0.468003	4.18416	-0.012809		0.468003	4.1861	0.00363588		0.468003	4.17536	0.00559688		0.468003	4.1632	-0.0208497		0.468003	4.18334	-0.006181		0.468003	4.1908	0.01086		0.468003	4.15211	0.00141859		0.468003	4.17035	-0.0205874		0.468003	4.2016	0.018394		0.468003	4.18984	0.00345707		0.468003	4.23706	-0.00399947
0.475203	4.18333	-0.0136435		0.475203	4.18556	0.00309944		0.475203	4.17646	0.0066936		0.475203	4.16204	-0.022006		0.475203	4.18043	-0.00909567		0.475203	4.19156	0.0116169		0.475203	4.15397	0.00327826		0.475203	4.17266	-0.0182807		0.475203	4.19989	0.0166893		0.475203	4.19256	0.006181		0.475203	4.23812	-0.00293851
0.482403	4.18233	-0.0146389		0.482403	4.18404	0.00157952		0.482403	4.17721	0.00743866		0.482403	4.16102	-0.0230253		0.482403	4.17765	-0.0118732		0.482403	4.19176	0.0118196		0.482403	4.15715	0.00646114		0.482403	4.17472	-0.0162244		0.482403	4.19804	0.0148416		0.482403	4.19521	0.00882745		0.482403	4.23846	-0.0025928
0.489603	4.18104	-0.0159323		0.489603	4.18161	-0.000852346		0.489603	4.17777	0.0080049		0.489603	4.16024	-0.0238061		0.489603	4.17516	-0.0143647		0.489603	4.19141	0.0114679		0.489603	4.1614	0.010711		0.489603	4.17618	-0.0147641		0.489603	4.19605	0.0128508		0.489603	4.19773	0.0113487		0.489603	4.23816	-0.00289083
0.496803	4.17942	-0.0175536		0.496803	4.17853	-0.00393391		0.496803	4.17821	0.00844598		0.496803	4.15983	-0.0242233		0.496803	4.17307	-0.0164509		0.496803	4.19075	0.0108063		0.496803	4.16629	0.0156045		0.496803	4.17684	-0.0140965		0.496803	4.19391	0.010711		0.496803	4.20009	0.0137091		0.496803	4.23732	-0.00373721
0.504003	4.17755	-0.0194252		0.504003	4.17525	-0.00721216		0.504003	4.17856	0.00879168		0.504003	4.15981	-0.0242352		0.504003	4.17154	-0.0179768		0.504003	4.19011	0.0101626		0.504003	4.17134	0.020653		0.504003	4.17672	-0.0142217		0.504003	4.19166	0.0084579		0.504003	4.20214	0.0157595		0.504003	4.23613	-0.0049293
0.511203	4.17554	-0.0214338		0.511203	4.17227	-0.0101924		0.511203	4.17885	0.00908375		0.511203	4.16026	-0.0237882		0.511203	4.17067	-0.018847		0.511203	4.18978	0.00983477		0.511203	4.17601	0.025326		0.511203	4.17596	-0.0149786		0.511203	4.18934	0.00613928		0.511203	4.20365	0.0172734		0.511203	4.2348	-0.00625849
0.518403	4.1735	-0.0234723		0.518403	4.16998	-0.0124872		0.518403	4.17916	0.00939369		0.518403	4.16124	-0.0228047		0.518403	4.1705	-0.0190258		0.518403	4.19001	0.0100672		0.518403	4.17982	0.0291348		0.518403	4.17477	-0.0161707		0.518403	4.18707	0.00386834		0.518403	4.20446	0.0180781		0.518403	4.23356	-0.0074923
0.525603	4.17149	-0.025481		0.525603	4.16858	-0.0138879		0.525603	4.17947	0.00970364		0.525603	4.16287	-0.0211835		0.525603	4.17088	-0.0186443		0.525603	4.19093	0.0109851		0.525603	4.18243	0.0317454		0.525603	4.17338	-0.0175595		0.525603	4.185	0.0017941		0.525603	4.20456	0.0181794		0.525603	4.23256	-0.00849962
0.532803	4.16956	-0.0274122		0.532803	4.16815	-0.014317		0.532803	4.1796	0.00982881		0.532803	4.16512	-0.0189245		0.532803	4.1716	-0.0179172		0.532803	4.19247	0.0125229		0.532803	4.18369	0.0329971		0.532803	4.17206	-0.0188828		0.532803	4.18327	7.15256e-05		0.532803	4.2041	0.0177205		0.532803	4.23175	-0.00931025
0.540003	4.16769	-0.0292778		0.540003	4.16868	-0.0137806		0.540003	4.17925	0.00947714		0.540003	4.1679	-0.0161469		0.540003	4.17244	-0.0170827		0.540003	4.19434	0.0143945		0.540003	4.18364	0.0329554		0.540003	4.17106	-0.0198841		0.540003	4.18205	-0.00115037		0.540003	4.20327	0.016886		0.540003	4.23098	-0.0100732
0.547204	4.16585	-0.0311196		0.547204	4.17013	-0.0123382		0.547204	4.17821	0.00844002		0.547204	4.17096	-0.0130892		0.547204	4.17313	-0.0163913		0.547204	4.19607	0.0161231		0.547204	4.18264	0.0319481		0.547204	4.17058	-0.0203609		0.547204	4.18139	-0.00181198		0.547204	4.20218	0.0157952		0.547204	4.23012	-0.0109315
0.554404	4.16399	-0.0329792		0.554404	4.17235	-0.0101149		0.554404	4.17645	0.00668168		0.554404	4.17399	-0.0100613		0.554404	4.17348	-0.0160456		0.554404	4.19714	0.0171959		0.554404	4.18119	0.0304997		0.554404	4.17062	-0.0203192		0.554404	4.18125	-0.00195503		0.554404	4.20099	0.0146151		0.554404	4.22911	-0.0119448
0.561604	4.16216	-0.0348151		0.561604	4.17514	-0.00731945		0.561604	4.17408	0.00431538		0.561604	4.17677	-0.00728369		0.561604	4.1733	-0.0162244		0.561604	4.19717	0.0172317		0.561604	4.17988	0.0291884		0.561604	4.17094	-0.0200033		0.561604	4.18151	-0.00169277		0.561604	4.20004	0.0136614		0.561604	4.228	-0.0130594
0.568804	4.16049	-0.036478		0.568804	4.1783	-0.0041604		0.568804	4.17125	0.00148416		0.568804	4.17914	-0.00490546		0.568804	4.17257	-0.0169516		0.568804	4.19596	0.0160158		0.568804	4.17916	0.0284731		0.568804	4.1712	-0.0197411		0.568804	4.18203	-0.00116825		0.568804	4.19971	0.0133336		0.568804	4.22689	-0.0141621
0.576004	4.1593	-0.0376701		0.576004	4.18168	-0.000786781		0.576004	4.16815	-0.00162125		0.576004	4.18105	-0.00300407		0.576004	4.1715	-0.0180185		0.576004	4.19345	0.0135124		0.576004	4.17932	0.0286281		0.576004	4.1711	-0.0198364		0.576004	4.18277	-0.000435114		0.576004	4.20025	0.01387		0.576004	4.22598	-0.015074
0.583204	4.1589	-0.0380754		0.583204	4.18519	0.00272989		0.583204	4.16506	-0.00470877		0.583204	4.18243	-0.00162125		0.583204	4.17048	-0.0190437		0.583204	4.1898	0.00985861		0.583204	4.18037	0.0296772		0.583204	4.17045	-0.0204861		0.583204	4.18372	0.0005126		0.583204	4.20158	0.0151992		0.583204	4.22546	-0.0155926
0.590404	4.15955	-0.0374258		0.590404	4.18882	0.00635982		0.590404	4.16244	-0.00733137		0.590404	4.18326	-0.000786781		0.590404	4.16995	-0.0195682		0.590404	4.18536	0.00541806		0.590404	4.1821	0.0314116		0.590404	4.16913	-0.0218093		0.590404	4.18491	0.00170469		0.590404	4.20335	0.0169694		0.590404	4.22558	-0.0154734
0.597604	4.16132	-0.0356555		0.597604	4.19251	0.0100434		0.597604	4.16071	-0.00905991		0.597604	4.18354	-0.0005126		0.597604	4.17024	-0.0192761		0.597604	4.18069	0.000745058		0.597604	4.18408	0.0333905		0.597604	4.16703	-0.0239074		0.597604	4.18632	0.00311732		0.597604	4.20513	0.0187457		0.597604	4.22656	-0.0144958
0.604804	4.16411	-0.03286		0.604804	4.19617	0.0137091		0.604804	4.16011	-0.00965595		0.604804	4.18338	-0.000673533		0.604804	4.17156	-0.0179589		0.604804	4.1765	-0.00344515		0.604804	4.1857	0.0350118		0.604804	4.16418	-0.0267565		0.604804	4.18786	0.00466108		0.604804	4.20658	0.0202		0.604804	4.22852	-0.0125349
0.612004	4.16767	-0.0293016		0.612004	4.19977	0.0173032		0.612004	4.16062	-0.00914335		0.612004	4.18303	-0.00101924		0.612004	4.17393	-0.0155866		0.612004	4.17342	-0.00652075		0.612004	4.18634	0.0356495		0.612004	4.16081	-0.0301301		0.612004	4.18938	0.006181		0.612004	4.20738	0.0209987		0.612004	4.23142	-0.00963211
0.619204	4.17163	-0.0253439		0.619204	4.20321	0.0207484		0.619204	4.16207	-0.00769496		0.619204	4.18282	-0.00122786		0.619204	4.17727	-0.0122488		0.619204	4.17184	-0.00810027		0.619204	4.18556	0.0348747		0.619204	4.15732	-0.033623		0.619204	4.1907	0.00749826		0.619204	4.20724	0.0208557		0.619204	4.23501	-0.00604987
0.626404	4.17551	-0.0214577		0.626404	4.20645	0.0239909		0.626404	4.16425	-0.00551939		0.626404	4.18294	-0.00110865		0.626404	4.18132	-0.0082016		0.626404	4.17187	-0.00807047		0.626404	4.18324	0.0325501		0.626404	4.15419	-0.0367463		0.626404	4.1916	0.00839233		0.626404	4.20593	0.0195503		0.626404	4.23887	-0.00218749
0.633604	4.1788	-0.0181735		0.633604	4.20939	0.0269294		0.633604	4.16696	-0.00280738		0.633604	4.18336	-0.000685454		0.633604	4.18565	-0.00386834		0.633604	4.17336	-0.00658035		0.633604	4.17954	0.0288486		0.633604	4.15189	-0.039053		0.633604	4.1918	0.00859499		0.633604	4.20346	0.0170767		0.633604	4.2426	0.00154972
0.640804	4.18105	-0.0159264		0.640804	4.21194	0.0294745		0.640804	4.17003	0.00026226		0.640804	4.18395	-9.5368e-05		0.640804	4.18977	0.000244379		0.640804	4.17599	-0.00395179		0.640804	4.17489	0.0241995		0.640804	4.15072	-0.0402212		0.640804	4.19102	0.00781417		0.640804	4.20009	0.0137091		0.640804	4.24593	0.00487566
0.648004	4.18203	-0.0149369		0.648004	4.21398	0.031513		0.648004	4.1732	0.00343323		0.648004	4.18459	0.000542402		0.648004	4.19325	0.00372529		0.648004	4.17922	-0.000727177		0.648004	4.16993	0.0192404		0.648004	4.15089	-0.0400543		0.648004	4.18905	0.00584722		0.648004	4.19627	0.00989437		0.648004	4.24868	0.00762939
0.655204	4.18182	-0.0151515		0.655204	4.21536	0.0328958		0.655204	4.17622	0.00645518		0.655204	4.18527	0.00121594		0.655204	4.19585	0.00633001		0.655204	4.18236	0.00241399		0.655204	4.16541	0.0147164		0.655204	4.15248	-0.0384629		0.655204	4.18599	0.00278354		0.655204	4.1924	0.00602007		0.655204	4.25078	0.00972152
0.662404	4.18057	-0.0163972		0.662404	4.21584	0.0333726		0.662404	4.17889	0.00912547		0.662404	4.18597	0.00192523		0.662404	4.19751	0.00799298		0.662404	4.1847	0.00475645		0.662404	4.16197	0.0112832		0.662404	4.15545	-0.0354886		0.662404	4.18227	-0.000929832		0.662404	4.18885	0.00246763		0.662404	4.25211	0.0110507
0.669604	4.17851	-0.0184596		0.669604	4.21512	0.0326574		0.669604	4.18109	0.0113249		0.669604	4.18655	0.00250339		0.669604	4.19826	0.00873804		0.669604	4.1857	0.00575781		0.669604	4.16003	0.00934601		0.669604	4.1596	-0.0313401		0.669604	4.17854	-0.00466704		0.669604	4.18591	-0.000464916		0.669604	4.25264	0.0115812
0.676804	4.17578	-0.0211895		0.676804	4.21298	0.0305176		0.676804	4.18273	0.012958		0.676804	4.18668	0.00263452		0.676804	4.1981	0.00858307		0.676804	4.18512	0.00517964		0.676804	4.15962	0.00892878		0.676804	4.16454	-0.0263989		0.676804	4.17542	-0.00778437		0.676804	4.18388	-0.0025034		0.676804	4.25246	0.0114083
0.684004	4.17255	-0.024426		0.684004	4.20935	0.0268817		0.684004	4.18369	0.0139236		0.684004	4.18612	0.00207424		0.684004	4.19707	0.00755191		0.684004	4.18306	0.00311732		0.684004	4.16047	0.00978112		0.684004	4.16973	-0.0212133		0.684004	4.17337	-0.00983477		0.684004	4.18286	-0.00351667		0.684004	4.25184	0.0107884
0.691204	4.16903	-0.0279367		0.691204	4.20437	0.0219047		0.691204	4.18388	0.0141144		0.691204	4.18489	0.000840425		0.691204	4.19521	0.00568628		0.691204	4.17986	-8.34465e-05		0.691204	4.16217	0.0114858		0.691204	4.17458	-0.0163555		0.691204	4.17262	-0.0105858		0.691204	4.18289	-0.00349283		0.691204	4.25109	0.0100315
0.698404	4.1655	-0.0314713		0.698404	4.19842	0.0159562		0.698404	4.1833	0.0135303		0.698404	4.18319	-0.000858307		0.698404	4.19259	0.00306964		0.698404	4.17608	-0.00386238		0.698404	4.16424	0.0135481		0.698404	4.17866	-0.0122786		0.698404	4.17318	-0.0100195		0.698404	4.18384	-0.00253916		0.698404	4.25042	0.00936389
0.705605	4.16217	-0.0348032		0.705605	4.19201	0.0095427		0.705605	4.18205	0.0122845		0.705605	4.1812	-0.0028491		0.705605	4.18936	-0.000160933		0.705605	4.17232	-0.00762343		0.705605	4.16614	0.0154555		0.705605	4.18171	-0.00923276		0.705605	4.17485	-0.00835061		0.705605	4.18566	-0.000721216		0.705605	4.24995	0.00889301
0.712805	4.15924	-0.0377297		0.712805	4.18574	0.00327826		0.712805	4.18035	0.0105798		0.712805	4.17892	-0.00513196		0.712805	4.18568	-0.0038445		0.712805	4.16914	-0.0108063		0.712805	4.1674	0.0167072		0.712805	4.18366	-0.00727773		0.712805	4.17717	-0.00603199		0.712805	4.1883	0.00191927		0.712805	4.24975	0.00869036
0.720005	4.157	-0.0399709		0.720005	4.18018	-0.00228882		0.720005	4.17843	0.00866651		0.720005	4.17626	-0.00779033		0.720005	4.18174	-0.00778437		0.720005	4.16697	-0.0129759		0.720005	4.16763	0.0169396		0.720005	4.18459	-0.00634789		0.720005	4.17951	-0.00369549		0.720005	4.19161	0.00523329		0.720005	4.24986	0.00880957
0.727205	4.1558	-0.0411689		0.727205	4.17584	-0.00662804		0.727205	4.17655	0.00678301		0.727205	4.17322	-0.0108302		0.727205	4.17777	-0.011754		0.727205	4.16607	-0.013876		0.727205	4.16671	0.0160217		0.727205	4.18463	-0.00631213		0.727205	4.1813	-0.00190139		0.727205	4.19526	0.00887513		0.727205	4.25036	0.00930429
0.734405	4.156	-0.0409722		0.734405	4.17306	-0.00939965		0.734405	4.17486	0.00509024		0.734405	4.16995	-0.0140965		0.734405	4.17402	-0.0155032		0.734405	4.16648	-0.0134587		0.734405	4.16481	0.0141263		0.734405	4.18403	-0.00690818		0.734405	4.18223	-0.000971556		0.734405	4.19876	0.0123799		0.734405	4.25111	0.0100553
0.741605	4.15775	-0.0392199		0.741605	4.172	-0.0104606		0.741605	4.17342	0.0036478		0.741605	4.16659	-0.0174642		0.741605	4.17075	-0.0187695		0.741605	4.16808	-0.0118673		0.741605	4.16239	0.0117004		0.741605	4.18322	-0.0077188		0.741605	4.18229	-0.000917912		0.741605	4.20174	0.0153601		0.741605	4.25184	0.0107884
0.748805	4.16098	-0.0359952		0.748805	4.17245	-0.0100136		0.748805	4.17219	0.00242591		0.748805	4.16312	-0.0209272		0.748805	4.16818	-0.0213385		0.748805	4.1705	-0.00944138		0.748805	4.15999	0.00930428		0.748805	4.18264	-0.00829697		0.748805	4.18168	-0.00152588		0.748805	4.20396	0.0175834		0.748805	4.25218	0.0111222
0.756005	4.16538	-0.0315905		0.756005	4.174	-0.00846386		0.756005	4.17105	0.0012815		0.756005	4.15946	-0.0245869		0.756005	4.16647	-0.0230551		0.756005	4.17334	-0.00660419		0.756005	4.15811	0.00742078		0.756005	4.18251	-0.00843406		0.756005	4.18072	-0.00248551		0.756005	4.20535	0.0189662		0.756005	4.25179	0.0107348
0.763205	4.17053	-0.0264466		0.763205	4.17616	-0.00630021		0.763205	4.16986	9.5367e-05		0.763205	4.15554	-0.0285089		0.763205	4.16561	-0.0239134		0.763205	4.17611	-0.00383258		0.763205	4.15711	0.00642538		0.763205	4.1827	-0.00823736		0.763205	4.17976	-0.00344515		0.763205	4.20588	0.0195026		0.763205	4.2505	0.00944138
0.770405	4.17586	-0.021112		0.770405	4.17852	-0.00393987		0.770405	4.16862	-0.00115037		0.770405	4.15144	-0.0326097		0.770405	4.16545	-0.0240684		0.770405	4.17844	-0.00150204		0.770405	4.15727	0.00658631		0.770405	4.18296	-0.00798106		0.770405	4.17911	-0.00408888		0.770405	4.20555	0.0191748		0.770405	4.2483	0.00724792
0.777605	4.18073	-0.0162423		0.777605	4.18075	-0.00171065		0.777605	4.16743	-0.00234246		0.777605	4.14739	-0.0366628		0.777605	4.1658	-0.0237167		0.777605	4.18015	0.000208616		0.777605	4.15881	0.00811815		0.777605	4.18296	-0.00798106		0.777605	4.17897	-0.00423789		0.777605	4.20448	0.0181019		0.777605	4.24538	0.00432134
0.784805	4.18448	-0.0124931		0.784805	4.1826	0.000137091		0.784805	4.16646	-0.00330806		0.784805	4.14369	-0.0403583		0.784805	4.16645	-0.023073		0.784805	4.18119	0.0012517		0.784805	4.16177	0.0110805		0.784805	4.18251	-0.00843406		0.784805	4.17929	-0.00391603		0.784805	4.20293	0.0165462		0.784805	4.24196	0.00090003
0.792005	4.18664	-0.0103354		0.792005	4.18383	0.00137091		0.792005	4.16594	-0.00382662		0.792005	4.14068	-0.0433743		0.792005	4.16721	-0.022316		0.792005	4.18165	0.00170469		0.792005	4.16591	0.0152171		0.792005	4.18143	-0.00950694		0.792005	4.17988	-0.00331998		0.792005	4.20127	0.0148892		0.792005	4.23832	-0.00273585
0.799205	4.18701	-0.00995994		0.799205	4.18431	0.00184774		0.799205	4.16606	-0.00370741		0.799205	4.13868	-0.0453651		0.799205	4.16791	-0.0216067		0.799205	4.18164	0.00169277		0.799205	4.17064	0.0199556		0.799205	4.17957	-0.0113726		0.799205	4.18044	-0.0027597		0.799205	4.19983	0.0134468		0.799205	4.23473	-0.00633001
0.806405	4.18565	-0.0113189		0.806405	4.18404	0.00157356		0.806405	4.1669	-0.00287294		0.806405	4.13799	-0.0460565		0.806405	4.16844	-0.0210762		0.806405	4.1813	0.00135303		0.806405	4.17525	0.0245571		0.806405	4.17684	-0.0140965		0.806405	4.18073	-0.00247359		0.806405	4.19876	0.0123799		0.806405	4.23145	-0.00960231
0.813605	4.18273	-0.0142395		0.813605	4.1832	0.000739098		0.813605	4.1684	-0.00137091		0.813605	4.13877	-0.0452816		0.813605	4.16874	-0.0207841		0.813605	4.18074	0.000792742		0.813605	4.17911	0.0284195		0.813605	4.17345	-0.017494		0.813605	4.1806	-0.00260472		0.813605	4.198	0.0116229		0.813605	4.22876	-0.0122964
0.820805	4.17858	-0.018388		0.820805	4.18206	-0.000405312		0.820805	4.17035	0.000578165		0.820805	4.14099	-0.0430584		0.820805	4.16886	-0.020659		0.820805	4.18009	0.000143051		0.820805	4.1818	0.0311136		0.820805	4.16977	-0.0211716		0.820805	4.18003	-0.00317693		0.820805	4.19739	0.011009		0.820805	4.22683	-0.0142217
0.828005	4.17368	-0.0232875		0.828005	4.18093	-0.0015378		0.828005	4.17243	0.00265837		0.828005	4.14444	-0.0396073		0.828005	4.16905	-0.0204742		0.828005	4.1794	-0.000542402		0.828005	4.18309	0.0324011		0.828005	4.16627	-0.0246704		0.828005	4.1791	-0.0041008		0.828005	4.19676	0.0103831		0.828005	4.22577	-0.0152886
0.835205	4.1687	-0.0282705		0.835205	4.18009	-0.00237823		0.835205	4.17431	0.00454187		0.835205	4.1487	-0.0353515		0.835205	4.16951	-0.0200093		0.835205	4.17866	-0.0012815		0.835205	4.18283	0.0321448		0.835205	4.16325	-0.0276864		0.835205	4.17802	-0.00517964		0.835205	4.19603	0.00964999		0.835205	4.22549	-0.0155628
0.842405	4.16435	-0.0326216		0.842405	4.17979	-0.00267029		0.842405	4.17572	0.0059545		0.842405	4.15324	-0.0308096		0.842405	4.17046	-0.0190616		0.842405	4.17784	-0.00209808		0.842405	4.18105	0.0303626		0.842405	4.1609	-0.0300407		0.842405	4.17704	-0.00616312		0.842405	4.19514	0.00875592		0.842405	4.22588	-0.0151753
0.849605	4.16117	-0.0358045		0.849605	4.18024	-0.00222325		0.849605	4.17656	0.00678897		0.849605	4.15754	-0.0265121		0.849605	4.17196	-0.0175595		0.849605	4.17693	-0.003016		0.849605	4.17801	0.0273168		0.849605	4.15931	-0.0316322		0.849605	4.17637	-0.00683665		0.849605	4.19406	0.00767708		0.849605	4.22685	-0.0142038
0.856805	4.15947	-0.0375032		0.856805	4.18149	-0.000971556		0.856805	4.17688	0.00711083		0.856805	4.16117	-0.0228763		0.856805	4.17402	-0.0154972		0.856805	4.17593	-0.00401139		0.856805	4.17417	0.0234783		0.856805	4.1586	-0.0323355		0.856805	4.17609	-0.00711083		0.856805	4.19279	0.0064075		0.856805	4.22831	-0.0127494
0.864006	4.15937	-0.0376046		0.864006	4.18358	0.00111461		0.864006	4.17693	0.00715852		0.864006	4.16392	-0.0201285		0.864006	4.17657	-0.0129521		0.864006	4.175	-0.00494719		0.864006	4.17009	0.0194013		0.864006	4.15882	-0.032115		0.864006	4.17615	-0.00705719		0.864006	4.1914	0.00502467		0.864006	4.23011	-0.0109434
0.871206	4.16085	-0.0361204		0.871206	4.18645	0.00398755		0.871206	4.17699	0.00721812		0.871206	4.1658	-0.018245		0.871206	4.17938	-0.0101388		0.871206	4.17432	-0.00562668		0.871206	4.16622	0.015533		0.871206	4.15988	-0.03106		0.871206	4.17638	-0.00681877		0.871206	4.19009	0.00371337		0.871206	4.23201	-0.00904799
0.878406	4.16376	-0.0332117		0.878406	4.1899	0.00743866		0.878406	4.17729	0.00752211		0.878406	4.16701	-0.017035		0.878406	4.18217	-0.00734925		0.878406	4.17409	-0.00585318		0.878406	4.16285	0.0121653		0.878406	4.16151	-0.0294328		0.878406	4.17661	-0.00659227		0.878406	4.18911	0.00272989		0.878406	4.23365	-0.0074029
0.885606	4.16774	-0.0292301		0.885606	4.19362	0.011152		0.885606	4.17796	0.00818968		0.885606	4.16782	-0.0162244		0.885606	4.18457	-0.00495315		0.885606	4.17447	-0.00547171		0.885606	4.16018	0.00948906		0.885606	4.16338	-0.0275612		0.885606	4.17666	-0.00653863		0.885606	4.18868	0.00230074		0.885606	4.23473	-0.00632405
0.892806	4.17228	-0.0246942		0.892806	4.1972	0.0147343		0.892806	4.17895	0.00917911		0.892806	4.16851	-0.0155389		0.892806	4.18631	-0.00321269		0.892806	4.1755	-0.00444651		0.892806	4.15837	0.00768304		0.892806	4.1652	-0.0257432		0.892806	4.17644	-0.00675917		0.892806	4.18895	0.00257492		0.892806	4.23504	-0.00602007
0.900006	4.17684	-0.0201285		0.900006	4.20029	0.0178277		0.900006	4.18011	0.0103414		0.900006	4.16923	-0.0148177		0.900006	4.18729	-0.00222921		0.900006	4.17707	-0.00287294		0.900006	4.15754	0.00685453		0.900006	4.16671	-0.0242293		0.900006	4.17593	-0.00727773		0.900006	4.18994	0.00356436		0.900006	4.23451	-0.00654459
0.907206	4.18106	-0.0159085		0.907206	4.20272	0.0202537		0.907206	4.18124	0.0114739		0.907206	4.17007	-0.0139773		0.907206	4.18759	-0.00193119		0.907206	4.179	-0.000941753		0.907206	4.15774	0.00705123		0.907206	4.16777	-0.0231683		0.907206	4.17516	-0.00804067		0.907206	4.19155	0.00517368		0.907206	4.23321	-0.00784397
0.914406	4.18466	-0.0123084		0.914406	4.2044	0.0219345		0.914406	4.18211	0.0123441		0.914406	4.17104	-0.0130117		0.914406	4.18735	-0.00217557		0.914406	4.18105	0.00110865		0.914406	4.15889	0.0082016		0.914406	4.16835	-0.0225902		0.914406	4.17429	-0.00891685		0.914406	4.19357	0.00719428		0.914406	4.23136	-0.00969172
0.921606	4.18751	-0.00945926		0.921606	4.20525	0.0227869		0.921606	4.18257	0.0127971		0.921606	4.17212	-0.0119328		0.921606	4.18668	-0.00283718		0.921606	4.18295	0.00300407		0.921606	4.16082	0.0101328		0.921606	4.16855	-0.0223935		0.921606	4.17343	-0.00977516		0.921606	4.19576	0.00938177		0.921606	4.22938	-0.0116765
0.928806	4.18949	-0.00748038		0.928806	4.20516	0.0226915		0.928806	4.1826	0.0128329		0.928806	4.17328	-0.0107646		0.928806	4.18569	-0.00382662		0.928806	4.18445	0.00451207		0.928806	4.16331	0.0126183		0.928806	4.16864	-0.0223041		0.928806	4.17268	-0.0105202		0.928806	4.19787	0.0114918		0.928806	4.22777	-0.0132859
0.936006	4.19055	-0.00642538		0.936006	4.20405	0.0215828		0.936006	4.1824	0.0126362		0.936006	4.17449	-0.00956059		0.936006	4.18444	-0.00507832		0.936006	4.1854	0.00545979		0.936006	4.16614	0.0154495		0.936006	4.16897	-0.0219703		0.936006	4.17206	-0.0111461		0.936006	4.19967	0.0132859		0.936006	4.22706	-0.0139952
0.943206	4.19068	-0.00629425		0.943206	4.20205	0.0195861		0.943206	4.18219	0.0124216		0.943206	4.17572	-0.00832677		0.943206	4.18301	-0.00651479		0.943206	4.18565	0.00570416		0.943206	4.16903	0.0183403		0.943206	4.16988	-0.0210643		0.943206	4.17153	-0.0116765		0.943206	4.20089	0.0145078		0.943206	4.22758	-0.0134766
0.950406	4.18998	-0.00699162		0.950406	4.19942	0.0169575		0.950406	4.1821	0.0123322		0.950406	4.17703	-0.00702143		0.950406	4.1814	-0.00812411		0.950406	4.18513	0.00519156		0.950406	4.17165	0.020957		0.950406	4.17157	-0.0193715		0.950406	4.17108	-0.0121236		0.950406	4.20129	0.0149131		0.950406	4.22935	-0.0117004
0.957606	4.18853	-0.00844598		0.957606	4.19639	0.0139236		0.957606	4.18215	0.0123858		0.957606	4.17849	-0.00555515		0.957606	4.17955	-0.00997186		0.957606	4.18392	0.00397563		0.957606	4.17362	0.0229359		0.957606	4.17406	-0.01688		0.957606	4.17071	-0.0124931		0.957606	4.20071	0.0143349		0.957606	4.23219	-0.00886917
0.964806	4.18643	-0.0105381		0.964806	4.19303	0.0105619		0.964806	4.1823	0.0125289		0.964806	4.18013	-0.00392199		0.964806	4.17738	-0.0121415		0.964806	4.18217	0.00222921		0.964806	4.17467	0.0239849		0.964806	4.17717	-0.0137687		0.964806	4.17048	-0.0127256		0.964806	4.19917	0.0127852		0.964806	4.23566	-0.00540018
0.972006	4.18386	-0.013113		0.972006	4.1894	0.00693202		0.972006	4.18242	0.0126481		0.972006	4.18183	-0.00221729		0.972006	4.17489	-0.014627		0.972006	4.18007	0.00013113		0.972006	4.17465	0.0239611		0.972006	4.18063	-0.0103116		0.972006	4.1704	-0.0128031		0.972006	4.19691	0.0105262		0.972006	4.23928	-0.00177026
0.979206	4.181	-0.015974		0.979206	4.18556	0.00309944		0.979206	4.18238	0.0126123		0.979206	4.18341	-0.00064373		0.979206	4.1723	-0.0172198		0.979206	4.17776	-0.00218749		0.979206	4.17356	0.0228703		0.979206	4.18417	-0.00676513		0.979206	4.17047	-0.0127316		0.979206	4.19424	0.00786185		0.979206	4.24259	0.0015378
0.986406	4.17813	-0.018841		0.986406	4.18171	-0.000756979		0.986406	4.18203	0.0122607		0.986406	4.18463	0.000578165		0.986406	4.16992	-0.019598		0.986406	4.17525	-0.00469089		0.986406	4.17149	0.020802		0.986406	4.18761	-0.00332594		0.986406	4.17061	-0.0125885		0.986406	4.19149	0.00510812		0.986406	4.24518	0.00412464
0.993606	4.17559	-0.0213802		0.993606	4.17795	-0.00451207		0.993606	4.18117	0.0114024		0.993606	4.18533	0.0012815		0.993606	4.16807	-0.0214517		0.993606	4.17261	-0.00733733		0.993606	4.16861	0.0179172		0.993606	4.19084	-9.53674e-05		0.993606	4.17072	-0.0124812		0.993606	4.18888	0.00249743		0.993606	4.24682	0.00576377
1.00081	4.17367	-0.0232995		1.00081	4.17433	-0.00813603		1.00081	4.17973	0.0099659		1.00081	4.18541	0.00136495		1.00081	4.16688	-0.0226438		1.00081	4.1699	-0.0100434		1.00081	4.16521	0.0145257		1.00081	4.19388	0.00293851		1.00081	4.17075	-0.0124514		1.00081	4.18658	0.000202656		1.00081	4.24746	0.0064075
1.00801	4.17259	-0.0243843		1.00801	4.17081	-0.0116587		1.00801	4.17776	0.00799298		1.00801	4.18484	0.000792742		1.00801	4.16633	-0.0231862		1.00801	4.16726	-0.0126779		1.00801	4.16173	0.0110447		1.00801	4.1968	0.00585914		1.00801	4.17073	-0.0124693		1.00801	4.18483	-0.00154972		1.00801	4.24724	0.00618696
1.01521	4.17243	-0.0245392		1.01521	4.16751	-0.0149548		1.01521	4.17539	0.00562072		1.01521	4.18364	-0.000411272		1.01521	4.16642	-0.0231028		1.01521	4.16474	-0.0151992		1.01521	4.15866	0.00796914		1.01521	4.19975	0.00880957		1.01521	4.17074	-0.0124633		1.01521	4.18371	-0.00267029		1.01521	4.24639	0.00533462
1.02241	4.17323	-0.0237465		1.02241	4.16471	-0.0177503		1.02241	4.17283	0.00306368		1.02241	4.18189	-0.00215769		1.02241	4.16718	-0.0223458		1.02241	4.16235	-0.0175953		1.02241	4.15644	0.00575185		1.02241	4.20277	0.0118315		1.02241	4.17083	-0.0123739		1.02241	4.18316	-0.00321865		1.02241	4.24514	0.00408888
1.02961	4.17489	-0.0220835		1.02961	4.1627	-0.0197649		1.02961	4.17027	0.000500679		1.02961	4.17979	-0.00426173		1.02961	4.16864	-0.0208855		1.02961	4.16008	-0.0198662		1.02961	4.15542	0.00473261		1.02961	4.2057	0.0147581		1.02961	4.17108	-0.0121236		1.02961	4.18296	-0.00342131		1.02961	4.24364	0.00258684
1.03681	4.17727	-0.0196993		1.03681	4.16166	-0.020808		1.03681	4.16791	-0.00185967		1.03681	4.17756	-0.00649095		1.03681	4.17073	-0.0187874		1.03681	4.15799	-0.0219524		1.03681	4.15576	0.00507236		1.03681	4.20812	0.0171781		1.03681	4.17165	-0.0115573		1.03681	4.18286	-0.00352263		1.03681	4.24187	0.000816584
1.04401	4.18015	-0.0168264		1.04401	4.16155	-0.0209093		1.04401	4.16597	-0.00380278		1.04401	4.17537	-0.00867844		1.04401	4.17323	-0.0162899		1.04401	4.15619	-0.0237525		1.04401	4.15749	0.00680089		1.04401	4.20952	0.0185847		1.04401	4.17277	-0.0104308		1.04401	4.18276	-0.003618		1.04401	4.23971	-0.0013411
1.05121	4.18312	-0.0138521		1.05121	4.16229	-0.0201702		1.05121	4.16467	-0.00510216		1.05121	4.17332	-0.0107288		1.05121	4.17591	-0.0136137		1.05121	4.15477	-0.025171		1.05121	4.16044	0.00975132		1.05121	4.20952	0.0185788		1.05121	4.17463	-0.00857711		1.05121	4.18277	-0.00361204		1.05121	4.23716	-0.00389814
1.05841	4.18581	-0.0111639		1.05841	4.16369	-0.0187755		1.05841	4.16428	-0.00548959		1.05841	4.17145	-0.0125945		1.05841	4.17856	-0.0109613		1.05841	4.15378	-0.0261664		1.05841	4.16428	0.0135899		1.05841	4.20794	0.0170052		1.05841	4.17717	-0.00603795		1.05841	4.18305	-0.00332594		1.05841	4.23431	-0.00674129
1.06561	4.18795	-0.00902414		1.06561	4.16551	-0.0169516		1.06561	4.165	-0.00476837		1.06561	4.16986	-0.0141919		1.06561	4.18105	-0.00847578		1.06561	4.15323	-0.0267088		1.06561	4.16853	0.0178397		1.06561	4.20485	0.0139117		1.06561	4.18009	-0.00311136		1.06561	4.18374	-0.00264049		1.06561	4.23144	-0.00961423
1.07281	4.18947	-0.00749826		1.07281	4.16748	-0.0149846		1.07281	4.16694	-0.00283122		1.07281	4.16868	-0.015372		1.07281	4.18315	-0.00637174		1.07281	4.1532	-0.0267446		1.07281	4.17269	0.0220001		1.07281	4.20043	0.00949502		1.07281	4.18304	-0.000160933		1.07281	4.18493	-0.00144839		1.07281	4.22876	-0.0122905
1.08001	4.19047	-0.00650287		1.08001	4.16929	-0.0131786		1.08001	4.16999	0.000220537		1.08001	4.16804	-0.0160098		1.08001	4.18454	-0.00498295		1.08001	4.15367	-0.0262737		1.08001	4.17626	0.0255704		1.08001	4.19509	0.00414848		1.08001	4.18572	0.00252128		1.08001	4.18664	0.00026226		1.08001	4.22643	-0.014621
1.08721	4.19104	-0.00593662		1.08721	4.17072	-0.0117421		1.08721	4.17389	0.00412464		1.08721	4.1679	-0.0161469		1.08721	4.18491	-0.00460744		1.08721	4.15468	-0.0252664		1.08721	4.17881	0.0281215		1.08721	4.1894	-0.0015378		1.08721	4.18798	0.00477433		1.08721	4.18882	0.00243783		1.08721	4.22455	-0.0165045
1.09441	4.19126	-0.00571609		1.09441	4.17175	-0.0107169		1.09441	4.17825	0.00848174		1.09441	4.16815	-0.0159025		1.09441	4.18416	-0.00536442		1.09441	4.15621	-0.0237346		1.09441	4.18003	0.0293434		1.09441	4.18415	-0.00678897		1.09441	4.18962	0.00641346		1.09441	4.19123	0.00485182		1.09441	4.22321	-0.0178456
1.10161	4.19127	-0.0056982		1.10161	4.17246	-0.0100017		1.10161	4.1826	0.0128329		1.10161	4.16865	-0.0154018		1.10161	4.18248	-0.00704527		1.10161	4.15832	-0.0216186		1.10161	4.17986	0.0291705		1.10161	4.17993	-0.011009		1.10161	4.19044	0.00724196		1.10161	4.19355	0.00717044		1.10161	4.22245	-0.0186086
1.10881	4.19133	-0.0056386		1.10881	4.17299	-0.00947714		1.10881	4.18652	0.0167489		1.10881	4.16936	-0.0146866		1.10881	4.18025	-0.00926852		1.10881	4.16105	-0.0188887		1.10881	4.17843	0.027746		1.10881	4.17706	-0.0138819		1.10881	4.1903	0.00709891		1.10881	4.19537	0.00898838		1.10881	4.22214	-0.0189126
1.11601	4.1917	-0.00526905		1.11601	4.17337	-0.00908971		1.11601	4.18953	0.0197649		1.11601	4.1703	-0.0137508		1.11601	4.17797	-0.0115514		1.11601	4.16426	-0.015682		1.11601	4.17603	0.0253379		1.11601	4.17544	-0.0154972		1.11601	4.18926	0.00605583		1.11601	4.1963	0.00992417		1.11601	4.22201	-0.0190496
1.12321	4.19245	-0.00452399		1.12321	4.17362	-0.00883937		1.12321	4.1913	0.0215292		1.12321	4.17133	-0.0127196		1.12321	4.17603	-0.0134885		1.12321	4.16768	-0.0122666		1.12321	4.17296	0.0222743		1.12321	4.17489	-0.0160515		1.12321	4.18758	0.00438094		1.12321	4.19613	0.00975132		1.12321	4.22176	-0.019294
1.13041	4.19342	-0.00355244		1.13041	4.1737	-0.00876784		1.13041	4.1917	0.0219345		1.13041	4.17221	-0.0118434		1.13041	4.17477	-0.0147462		1.13041	4.17095	-0.00898838		1.13041	4.16955	0.0188589		1.13041	4.17519	-0.0157475		1.13041	4.18561	0.00240207		1.13041	4.19477	0.00839233		1.13041	4.22124	-0.0198126
1.13761	4.19429	-0.00268221		1.13761	4.17363	-0.00883341		1.13761	4.19099	0.0212193		1.13761	4.17272	-0.0113249		1.13761	4.17444	-0.01508		1.13761	4.17379	-0.00615716		1.13761	4.16611	0.0154257		1.13761	4.17619	-0.0147521		1.13761	4.18357	0.000363588		1.13761	4.1924	0.00602007		1.13761	4.22053	-0.0205278
1.14481	4.19487	-0.00209808		1.14481	4.17349	-0.00897646		1.14481	4.18965	0.0198781		1.14481	4.17286	-0.0111938		1.14481	4.17514	-0.0143826		1.14481	4.17604	-0.00389814		1.14481	4.163	0.0123143		1.14481	4.17761	-0.0133336		1.14481	4.18162	-0.00157952		1.14481	4.18934	0.00296235		1.14481	4.21982	-0.0212371
1.15201	4.19514	-0.00183582		1.15201	4.17333	-0.00913739		1.15201	4.1882	0.0184357		1.15201	4.17264	-0.0114143		1.15201	4.1768	-0.0127196		1.15201	4.17769	-0.00225306		1.15201	4.16054	0.00985265		1.15201	4.17911	-0.0118256		1.15201	4.17994	-0.00326633		1.15201	4.18603	-0.000345707		1.15201	4.2193	-0.0217557
1.15921	4.19517	-0.00180006		1.15921	4.17317	-0.00929832		1.15921	4.18704	0.0172734		1.15921	4.17207	-0.0119805		1.15921	4.1792	-0.0103235		1.15921	4.17877	-0.00117421		1.15921	4.15896	0.00826716		1.15921	4.18045	-0.0104904		1.15921	4.1787	-0.00450611		1.15921	4.18288	-0.00350475		1.15921	4.21906	-0.0219941
1.16641	4.19507	-0.00190139		1.16641	4.17303	-0.00943542		1.16641	4.18645	0.0166774		1.16641	4.17112	-0.0129342		1.16641	4.182	-0.00751615		1.16641	4.17936	-0.000584126		1.16641	4.15832	0.0076294		1.16641	4.1815	-0.00943542		1.16641	4.17801	-0.00519753		1.16641	4.18028	-0.00609756		1.16641	4.21906	-0.0220001
1.17361	4.19489	-0.0020802		1.17361	4.17295	-0.00951886		1.17361	4.18663	0.0168622		1.17361	4.16977	-0.0142753		1.17361	4.18494	-0.0045836		1.17361	4.17961	-0.000327826		1.17361	4.1585	0.00781417		1.17361	4.18231	-0.00862479		1.17361	4.17778	-0.00541806		1.17361	4.17861	-0.00777245		1.17361	4.21915	-0.0219047
1.18081	4.19475	-0.00222325		1.18081	4.17289	-0.00957847		1.18081	4.18769	0.0179172		1.18081	4.16828	-0.0157714		1.18081	4.18777	-0.00175238		1.18081	4.17975	-0.000196695		1.18081	4.15933	0.00863671		1.18081	4.18287	-0.00807047		1.18081	4.17775	-0.00545382		1.18081	4.17821	-0.00816584		1.18081	4.21926	-0.0217974
1.18801	4.1948	-0.00216961		1.18801	4.17277	-0.00969172		1.18801	4.18943	0.0196576		1.18801	4.16698	-0.0170708		1.18801	4.19037	0.000852346		1.18801	4.17994	-5.96046e-06		1.18801	4.16057	0.00987649		1.18801	4.18304	-0.00790358		1.18801	4.17758	-0.00562668		1.18801	4.17931	-0.00706911		1.18801	4.21931	-0.0217497
1.19521	4.19517	-0.00180006		1.19521	4.17249	-0.00997782		1.19521	4.1914	0.0216365		1.19521	4.16622	-0.0178337		1.19521	4.19273	0.00320673		1.19521	4.18022	0.000274181		1.19521	4.16203	0.0113428		1.19521	4.18261	-0.00833273		1.19521	4.17697	-0.00623465		1.19521	4.18195	-0.00443459		1.19521	4.21925	-0.0218034
1.20241	4.19581	-0.00116229		1.20241	4.17194	-0.0105262		1.20241	4.19313	0.023365		1.20241	4.16616	-0.0178874		1.20241	4.19486	0.00534058		1.20241	4.18044	0.000494719		1.20241	4.16351	0.012821		1.20241	4.18143	-0.00950694		1.20241	4.17579	-0.00741482		1.20241	4.1859	-0.000482798		1.20241	4.2191	-0.0219584
1.20961	4.19645	-0.000524521		1.20961	4.17112	-0.0113487		1.20961	4.19425	0.0244856		1.20961	4.16684	-0.0172138		1.20961	4.19679	0.00727177		1.20961	4.18035	0.000411272		1.20961	4.1648	0.0141144		1.20961	4.17951	-0.0114262		1.20961	4.17405	-0.00914931		1.20961	4.19075	0.00436902		1.20961	4.21894	-0.0221133
1.21681	4.19675	-0.000226498		1.21681	4.17011	-0.012356		1.21681	4.19461	0.0248432		1.21681	4.16816	-0.0158846		1.21681	4.19842	0.00889897		1.21681	4.17975	-0.000190735		1.21681	4.1657	0.0150084		1.21681	4.17704	-0.0138998		1.21681	4.17194	-0.0112653		1.21681	4.19587	0.00948906		1.21681	4.21897	-0.0220835
1.22401	4.1964	-0.000572205		1.22401	4.16914	-0.0133216		1.22401	4.19411	0.0243425		1.22401	4.16995	-0.0141025		1.22401	4.19958	0.0100553		1.22401	4.17855	-0.00138879		1.22401	4.16611	0.0154197		1.22401	4.17432	-0.0166237		1.22401	4.16972	-0.0134826		1.22401	4.20051	0.0141323		1.22401	4.21942	-0.0216365
1.23121	4.19525	-0.00172257		1.23121	4.16847	-0.0139892		1.23121	4.19269	0.0229239		1.23121	4.17183	-0.012219		1.23121	4.20012	0.0106037		1.23121	4.17683	-0.00311732		1.23121	4.16612	0.0154316		1.23121	4.17168	-0.0192642		1.23121	4.16772	-0.0154853		1.23121	4.20393	0.0175476		1.23121	4.2204	-0.020653
1.23841	4.19321	-0.00376105		1.23841	4.16842	-0.0140488		1.23841	4.19034	0.0205755		1.23841	4.17333	-0.0107229		1.23841	4.20004	0.0105143		1.23841	4.17473	-0.00521541		1.23841	4.16595	0.0152648		1.23841	4.16945	-0.0214875		1.23841	4.16621	-0.0169933		1.23841	4.20554	0.0191629		1.23841	4.22189	-0.0191629
1.24561	4.19029	-0.00668168		1.24561	4.16915	-0.0133097		1.24561	4.18725	0.017482		1.24561	4.17399	-0.0100553		1.24561	4.19938	0.00985861		1.24561	4.17241	-0.00752807		1.24561	4.16579	0.0151038		1.24561	4.16792	-0.0230193		1.24561	4.16537	-0.0178337		1.24561	4.20508	0.0187039		1.24561	4.22379	-0.0172675
1.25281	4.18658	-0.010395		1.25281	4.17074	-0.0117242		1.25281	4.18367	0.0139058		1.25281	4.17358	-0.0104666		1.25281	4.19821	0.00869036		1.25281	4.17007	-0.00987053		1.25281	4.16579	0.0150979		1.25281	4.16728	-0.023663		1.25281	4.16523	-0.0179768		1.25281	4.20263	0.0162542		1.25281	4.22596	-0.0150979
1.26001	4.18233	-0.0146449		1.26001	4.17302	-0.00944138		1.26001	4.17982	0.0100553		1.26001	4.17209	-0.0119627		1.26001	4.19659	0.00706911		1.26001	4.16791	-0.0120342		1.26001	4.16602	0.0153363		1.26001	4.1676	-0.0233352		1.26001	4.16564	-0.0175595		1.26001	4.1986	0.0122249		1.26001	4.22834	-0.0127137
1.26721	4.17795	-0.0190258		1.26721	4.17575	-0.00671744		1.26721	4.1758	0.00603199		1.26721	4.1697	-0.0143468		1.26721	4.19458	0.00505447		1.26721	4.16606	-0.0138819		1.26721	4.16662	0.0159264		1.26721	4.16874	-0.0221968		1.26721	4.16638	-0.0168204		1.26721	4.19371	0.00732541		1.26721	4.23091	-0.0101447
1.27441	4.17394	-0.0230312		1.27441	4.17862	-0.0038445		1.27441	4.17172	0.00194907		1.27441	4.16673	-0.0173151		1.27441	4.19238	0.00285506		1.27441	4.16456	-0.015384		1.27441	4.16773	0.017041		1.27441	4.17036	-0.0205755		1.27441	4.16715	-0.0160515		1.27441	4.18884	0.00246167		1.27441	4.23358	-0.00747442
1.28161	4.17075	-0.026226		1.28161	4.18138	-0.0010848		1.28161	4.16777	-0.00199676		1.28161	4.16359	-0.0204563		1.28161	4.19023	0.000709295		1.28161	4.16327	-0.0166714		1.28161	4.16947	0.0187814		1.28161	4.17201	-0.0189304		1.28161	4.16777	-0.0154316		1.28161	4.18488	-0.00150204		1.28161	4.23626	-0.00479817
1.28881	4.16868	-0.0282884		1.28881	4.18383	0.00136495		1.28881	4.16427	-0.00550151		1.28881	4.16074	-0.0233054		1.28881	4.18832	-0.00120401		1.28881	4.16203	-0.0179112		1.28881	4.17191	0.0212252		1.28881	4.17331	-0.0176251		1.28881	4.16817	-0.0150323		1.28881	4.18241	-0.00396967		1.28881	4.23881	-0.00224113
1.29601	4.16791	-0.0290632		1.29601	4.18585	0.00338554		1.29601	4.16148	-0.00828505		1.29601	4.15863	-0.0254214		1.29601	4.18664	-0.0028789		1.29601	4.16078	-0.0191629		1.29601	4.17504	0.0243545		1.29601	4.1741	-0.0168443		1.29601	4.16837	-0.0148356		1.29601	4.18161	-0.00477433		1.29601	4.24103	-2.98023e-05
1.30321	4.16848	-0.028491		1.30321	4.18749	0.00503063		1.30321	4.15965	-0.0101209		1.30321	4.15748	-0.0265658		1.30321	4.18512	-0.00439882		1.30321	4.1596	-0.0203431		1.30321	4.1788	0.0281155		1.30321	4.17436	-0.016582		1.30321	4.1684	-0.0148058		1.30321	4.18224	-0.00414252		1.30321	4.24258	0.00152588
1.31041	4.17035	-0.0266254		1.31041	4.18892	0.00645518		1.31041	4.15894	-0.0108302		1.31041	4.15729	-0.0267625		1.31041	4.18369	-0.00583529		1.31041	4.15871	-0.0212312		1.31041	4.18307	0.0323772		1.31041	4.17429	-0.0166476		1.31041	4.16823	-0.0149727		1.31041	4.18384	-0.00253916		1.31041	4.24309	0.00203252
1.31761	4.17333	-0.0236392		1.31761	4.19036	0.00789165		1.31761	4.15944	-0.0103235		1.31761	4.15778	-0.0262737		1.31761	4.18237	-0.0071466		1.31761	4.15829	-0.0216544		1.31761	4.18757	0.0368774		1.31761	4.1742	-0.0167429		1.31761	4.16784	-0.0153661		1.31761	4.18583	-0.000554323		1.31761	4.24222	0.00116229
1.32481	4.17703	-0.0199437		1.32481	4.19194	0.00947714		1.32481	4.16119	-0.00858307		1.32481	4.15862	-0.0254273		1.32481	4.18129	-0.0082314		1.32481	4.15848	-0.0214636		1.32481	4.19192	0.0412345		1.32481	4.17443	-0.0165105		1.32481	4.16715	-0.0160575		1.32481	4.1876	0.0012219		1.32481	4.23989	-0.00116825
1.33201	4.18093	-0.0160456		1.33201	4.19362	0.011158		1.33201	4.16389	-0.00587702		1.33201	4.15953	-0.0245154		1.33201	4.18049	-0.0090301		1.33201	4.15936	-0.0205874		1.33201	4.19573	0.0450373		1.33201	4.17531	-0.0156343		1.33201	4.16609	-0.0171125		1.33201	4.1886	0.00221729		1.33201	4.23627	-0.00478029
1.33921	4.1845	-0.0124753		1.33921	4.19514	0.0126779		1.33921	4.16713	-0.00264049		1.33921	4.1603	-0.0237525		1.33921	4.18006	-0.00945926		1.33921	4.16092	-0.0190258		1.33921	4.19862	0.0479281		1.33921	4.177	-0.0139356		1.33921	4.16465	-0.018549		1.33921	4.18853	0.00214577		1.33921	4.23186	-0.009197
1.34641	4.18733	-0.00964403		1.34641	4.19618	0.013715		1.34641	4.17039	0.000619888		1.34641	4.16074	-0.0233114		1.34641	4.18008	-0.00944138		1.34641	4.16296	-0.0169873		1.34641	4.20032	0.0496328		1.34641	4.17953	-0.0114083		1.34641	4.16294	-0.0202596		1.34641	4.18744	0.00106096		1.34641	4.22724	-0.0138164
1.35361	4.18916	-0.00780821		1.35361	4.19636	0.0138998		1.35361	4.17327	0.00349879		1.35361	4.16074	-0.0233054		1.35361	4.18069	-0.00882745		1.35361	4.16502	-0.014919		1.35361	4.20066	0.0499725		1.35361	4.1827	-0.00824332		1.35361	4.16125	-0.0219524		1.35361	4.18569	-0.000685453		1.35361	4.22312	-0.017935
1.36081	4.18985	-0.00711679		1.36081	4.19539	0.0129282		1.36081	4.17547	0.00570417		1.36081	4.16034	-0.0237048		1.36081	4.18203	-0.00748634		1.36081	4.16659	-0.0133514		1.36081	4.19961	0.0489175		1.36081	4.18622	-0.00471473		1.36081	4.15998	-0.0232279		1.36081	4.18375	-0.00262856		1.36081	4.22012	-0.0209391
1.36801	4.18924	-0.00773072		1.36801	4.19313	0.0106692		1.36801	4.1768	0.00702739		1.36801	4.15974	-0.0243127		1.36801	4.18408	-0.0054419		1.36801	4.16732	-0.0126183		1.36801	4.19732	0.0466287		1.36801	4.18974	-0.00119805		1.36801	4.15952	-0.0236809		1.36801	4.18199	-0.0043869		1.36801	4.21863	-0.0224233
1.37521	4.18726	-0.0097096		1.37521	4.18965	0.00718236		1.37521	4.17714	0.00736713		1.37521	4.15921	-0.0248432		1.37521	4.18663	-0.00289083		1.37521	4.16721	-0.0127316		1.37521	4.19419	0.0434995		1.37521	4.19286	0.00192523		1.37521	4.16021	-0.0229895		1.37521	4.18072	-0.00566244		1.37521	4.21879	-0.0222683
1.38241	4.18398	-0.0129879		1.38241	4.18527	0.00280738		1.38241	4.17653	0.00676513		1.38241	4.15896	-0.0250936		1.38241	4.18936	-0.000160933		1.38241	4.16653	-0.013417		1.38241	4.19081	0.0401258		1.38241	4.19523	0.00429153		1.38241	4.16219	-0.0210166		1.38241	4.18016	-0.00621676		1.38241	4.2204	-0.020659
1.38961	4.17967	-0.0172973		1.38961	4.1806	-0.00185966		1.38961	4.17517	0.00540614		1.38961	4.15911	-0.0249386		1.38961	4.19196	0.00243783		1.38961	4.16559	-0.0143528		1.38961	4.18784	0.0371516		1.38961	4.19663	0.00568628		1.38961	4.16536	-0.0178397		1.38961	4.18044	-0.00593662		1.38961	4.22305	-0.0180066
1.39681	4.17474	-0.0222325		1.39681	4.17629	-0.00616908		1.39681	4.17337	0.00360012		1.39681	4.15969	-0.0243545		1.39681	4.19415	0.00463128		1.39681	4.16468	-0.0152588		1.39681	4.18581	0.0351191		1.39681	4.19705	0.00610948		1.39681	4.16948	-0.013721		1.39681	4.18153	-0.00484586		1.39681	4.22618	-0.0148773
1.40401	4.16964	-0.0273287		1.40401	4.17288	-0.00958443		1.40401	4.17139	0.00162125		1.40401	4.16075	-0.0232995		1.40401	4.1957	0.006181		1.40401	4.16408	-0.0158608		1.40401	4.18501	0.0343204		1.40401	4.19677	0.00583529		1.40401	4.17407	-0.00913739		1.40401	4.1832	-0.00318289		1.40401	4.2292	-0.0118554
1.41121	4.16483	-0.0321448		1.41121	4.1707	-0.011766		1.41121	4.16946	-0.000309944		1.41121	4.16233	-0.0217199		1.41121	4.19637	0.00684857		1.41121	4.16406	-0.0158846		1.41121	4.18547	0.0347853		1.41121	4.19611	0.00517368		1.41121	4.17854	-0.00466704		1.41121	4.18513	-0.00124574		1.41121	4.23167	-0.00938773
1.41841	4.16071	-0.0362575		1.41841	4.16989	-0.0125706		1.41841	4.16778	-0.00198484		1.41841	4.1644	-0.0196457		1.41841	4.19604	0.00652075		1.41841	4.16476	-0.0151813		1.41841	4.18704	0.0363469		1.41841	4.19529	0.00435114		1.41841	4.18239	-0.000816584		1.41841	4.18707	0.000691414		1.41841	4.23343	-0.00762939
1.42561	4.15772	-0.0392497		1.42561	4.17035	-0.0121117		1.42561	4.1666	-0.00317097		1.42561	4.16688	-0.0171721		1.42561	4.1948	0.00527501		1.42561	4.16605	-0.0138879		1.42561	4.18929	0.0386		1.42561	4.19437	0.00343323		1.42561	4.18529	0.00208616		1.42561	4.18893	0.00254512		1.42561	4.23453	-0.00652671
1.43281	4.15616	-0.0408113		1.43281	4.17179	-0.0106692		1.43281	4.16612	-0.0036478		1.43281	4.16961	-0.0144422		1.43281	4.19292	0.00340343		1.43281	4.16749	-0.0124574		1.43281	4.19168	0.0409901		1.43281	4.19338	0.00243783		1.43281	4.18718	0.00397563		1.43281	4.19071	0.00433326		1.43281	4.23517	-0.00588894
1.44001	4.15612	-0.040853		1.44001	4.17376	-0.00870228		1.44001	4.16644	-0.00332594		1.44001	4.17253	-0.0115156		1.44001	4.19075	0.00123382		1.44001	4.16859	-0.0113487		1.44001	4.19357	0.0428796		1.44001	4.1924	0.00146031		1.44001	4.18818	0.00497699		1.44001	4.19248	0.00610352		1.44001	4.23551	-0.00554323
1.44721	4.15735	-0.0396192		1.44721	4.17578	-0.00668764		1.44721	4.16752	-0.0022471		1.44721	4.17563	-0.00841618		1.44721	4.18854	-0.000983477		1.44721	4.16914	-0.0108004		1.44721	4.19437	0.0436783		1.44721	4.19145	0.0005126		1.44721	4.18852	0.00531673		1.44721	4.19431	0.00792742		1.44721	4.23574	-0.00531077
1.45441	4.15938	-0.0375867		1.45441	4.17744	-0.00502467		1.45441	4.16918	-0.000584126		1.45441	4.17885	-0.00520349		1.45441	4.18642	-0.00309944		1.45441	4.16926	-0.0106812		1.45441	4.19376	0.0430703		1.45441	4.19041	-0.000530481		1.45441	4.18847	0.00526309		1.45441	4.19621	0.00983477		1.45441	4.23602	-0.00503063
1.46161	4.16163	-0.0353456		1.46161	4.17857	-0.00389814		1.46161	4.17123	0.00146627		1.46161	4.182	-0.00204444		1.46161	4.18455	-0.00497103		1.46161	4.16925	-0.0106931		1.46161	4.19168	0.0409901		1.46161	4.18901	-0.00192523		1.46161	4.18826	0.00506043		1.46161	4.19825	0.0118673		1.46161	4.23652	-0.00453591
1.46881	4.16364	-0.0333309		1.46881	4.17914	-0.00331998		1.46881	4.17341	0.00364184		1.46881	4.18483	0.000780821		1.46881	4.18307	-0.00644922		1.46881	4.16939	-0.01055		1.46881	4.18831	0.0376225		1.46881	4.18711	-0.00383258		1.46881	4.18801	0.00480413		1.46881	4.20043	0.0140488		1.46881	4.23729	-0.00376105
1.47601	4.16518	-0.0317931		1.47601	4.17925	-0.00321865		1.47601	4.17541	0.0056386		1.47601	4.1871	0.00305176		1.47601	4.18195	-0.00756979		1.47601	4.16983	-0.0101089		1.47601	4.18398	0.0332952		1.47601	4.18481	-0.00612736		1.47601	4.18767	0.00446439		1.47601	4.20265	0.0162721		1.47601	4.2383	-0.00275373
1.48321	4.16614	-0.0308335		1.48321	4.17893	-0.00353456		1.48321	4.17694	0.0071764		1.48321	4.18867	0.00462532		1.48321	4.18097	-0.00854731		1.48321	4.17066	-0.0092864		1.48321	4.17914	0.0284493		1.48321	4.18254	-0.00840425		1.48321	4.18711	0.0039041		1.48321	4.20471	0.0183284		1.48321	4.23941	-0.00164509
1.49041	4.16653	-0.0304461		1.49041	4.17825	-0.00421405		1.49041	4.17792	0.00815391		1.49041	4.18949	0.00543594		1.49041	4.17983	-0.00969172		1.49041	4.17185	-0.00809431		1.49041	4.17428	0.0235915		1.49041	4.18066	-0.0102758		1.49041	4.18618	0.00297427		1.49041	4.20625	0.0198722		1.49041	4.24046	-0.000596046
1.49761	4.16641	-0.0305593		1.49761	4.17728	-0.00517964		1.49761	4.1784	0.00863671		1.49761	4.18947	0.00542402		1.49761	4.17832	-0.0111997		1.49761	4.17333	-0.00661612		1.49761	4.16996	0.0192702		1.49761	4.17942	-0.0115156		1.49761	4.18484	0.00163913		1.49761	4.20693	0.0205457		1.49761	4.24135	0.000292063
1.50481	4.16604	-0.0309348		1.50481	4.17615	-0.00631809		1.50481	4.17863	0.00886321		1.50481	4.18863	0.00457764		1.50481	4.17649	-0.0130355		1.50481	4.17484	-0.00510216		1.50481	4.16659	0.0159025		1.50481	4.17883	-0.0121057		1.50481	4.18316	-4.76837e-05		1.50481	4.20649	0.0201106		1.50481	4.242	0.000941753
1.51201	4.16569	-0.0312865		1.51201	4.17495	-0.00751615		1.51201	4.1788	0.0090301		1.51201	4.18705	0.00299811		1.51201	4.17449	-0.0150263		1.51201	4.17608	-0.00386238		1.51201	4.16442	0.0137329		1.51201	4.17885	-0.0120938		1.51201	4.18125	-0.00195503		1.51201	4.20489	0.0185072		1.51201	4.24238	0.00132918
1.51921	4.16558	-0.0313878		1.51921	4.17374	-0.00872016		1.51921	4.17899	0.00922084		1.51921	4.18496	0.000905991		1.51921	4.17255	-0.0169694		1.51921	4.1768	-0.00314116		1.51921	4.16356	0.0128746		1.51921	4.17933	-0.011605		1.51921	4.17928	-0.00392795		1.51921	4.20223	0.0158489		1.51921	4.24255	0.00149012
1.52641	4.16576	-0.031215		1.52641	4.17261	-0.00985861		1.52641	4.1792	0.00942945		1.52641	4.18269	-0.00135899		1.52641	4.17077	-0.0187516		1.52641	4.17704	-0.00290275		1.52641	4.16402	0.0133336		1.52641	4.18006	-0.0108838		1.52641	4.1774	-0.00580549		1.52641	4.19873	0.0123501		1.52641	4.24261	0.00155568
1.53361	4.16603	-0.0309408		1.53361	4.17166	-0.0108004		1.53361	4.17933	0.00956655		1.53361	4.18056	-0.00349283		1.53361	4.16929	-0.0202298		1.53361	4.17711	-0.00283122		1.53361	4.16571	0.0150263		1.53361	4.18066	-0.0102818		1.53361	4.17572	-0.00748634		1.53361	4.19464	0.00825524		1.53361	4.24277	0.00171661
1.54081	4.16619	-0.0307798		1.54081	4.17109	-0.0113785		1.54081	4.17926	0.00949502		1.54081	4.17873	-0.00531673		1.54081	4.16826	-0.021261		1.54081	4.17747	-0.00246763		1.54081	4.16836	0.0176728		1.54081	4.18083	-0.0101089		1.54081	4.17432	-0.00888109		1.54081	4.19025	0.00386834		1.54081	4.24313	0.00207424
1.54801	4.1661	-0.0308692		1.54801	4.17104	-0.0114262		1.54801	4.17879	0.00901818		1.54801	4.17731	-0.00674129		1.54801	4.16781	-0.021708		1.54801	4.17851	-0.00143647		1.54801	4.17146	0.0207722		1.54801	4.18041	-0.0105321		1.54801	4.17321	-0.0099957		1.54801	4.18589	-0.000494719		1.54801	4.24369	0.00263453
1.55521	4.16583	-0.0311434		1.55521	4.17155	-0.0109136		1.55521	4.17768	0.0079155		1.55521	4.17629	-0.00776053		1.55521	4.16794	-0.0215769		1.55521	4.18039	0.000447035		1.55521	4.17442	0.0237346		1.55521	4.17944	-0.0115037		1.55521	4.17233	-0.0108719		1.55521	4.18186	-0.00451803		1.55521	4.2444	0.00334382
1.56241	4.16554	-0.0314355		1.56241	4.17252	-0.00994205		1.56241	4.17582	0.00604987		1.56241	4.17568	-0.00836849		1.56241	4.16853	-0.0209868		1.56241	4.18308	0.0031352		1.56241	4.17669	0.0260055		1.56241	4.1781	-0.0128388		1.56241	4.17155	-0.0116527		1.56241	4.17842	-0.00795722		1.56241	4.24511	0.00405908
1.56961	4.16539	-0.0315845		1.56961	4.1738	-0.00866055		1.56961	4.17327	0.00349879		1.56961	4.17553	-0.00852346		1.56961	4.16937	-0.0201523		1.56961	4.1863	0.00635386		1.56961	4.17789	0.0272036		1.56961	4.17663	-0.0143051		1.56961	4.17071	-0.0124931		1.56961	4.17569	-0.0106931		1.56961	4.24562	0.00455976
1.57681	4.16547	-0.0315011		1.57681	4.17521	-0.00725389		1.57681	4.17033	0.000560284		1.57681	4.17588	-0.0081718		1.57681	4.17028	-0.0192404		1.57681	4.18963	0.00969172		1.57681	4.17774	0.0270545		1.57681	4.17523	-0.0157058		1.57681	4.1697	-0.0135064		1.57681	4.17361	-0.0127733		1.57681	4.24561	0.00455379
1.58401	4.1658	-0.0311732		1.58401	4.17657	-0.00588894		1.58401	4.16741	-0.00235438		1.58401	4.1767	-0.00734925		1.58401	4.17117	-0.0183523		1.58401	4.19254	0.0126004		1.58401	4.17614	0.0254512		1.58401	4.17409	-0.0168502		1.58401	4.1685	-0.0146985		1.58401	4.17207	-0.0143051		1.58401	4.24473	0.00367761
1.59121	4.16635	-0.0306249		1.59121	4.17764	-0.00482202		1.59121	4.16495	-0.00482202		1.59121	4.17788	-0.00616908		1.59121	4.172	-0.0175238		1.59121	4.19441	0.014472		1.59121	4.17313	0.0224411		1.59121	4.17329	-0.0176489		1.59121	4.16726	-0.0159383		1.59121	4.17094	-0.0154436		1.59121	4.2428	0.00174642
1.59841	4.1671	-0.0298738		1.59841	4.17819	-0.00427365		1.59841	4.16319	-0.00658035		1.59841	4.17923	-0.00481606		1.59841	4.17273	-0.0167906		1.59841	4.1948	0.0148535		1.59841	4.16909	0.0184		1.59841	4.17284	-0.0181019		1.59841	4.16613	-0.0170767		1.59841	4.17015	-0.0162303		1.59841	4.23989	-0.00116825
1.60561	4.16794	-0.0290275		1.60561	4.17804	-0.00442266		1.60561	4.16222	-0.00755191		1.60561	4.18058	-0.00346899		1.60561	4.17331	-0.0162125		1.60561	4.1935	0.0135541		1.60561	4.16459	0.0138998		1.60561	4.17269	-0.0182509		1.60561	4.16524	-0.0179589		1.60561	4.16974	-0.0166357		1.60561	4.23634	-0.00471473
1.61281	4.16874	-0.0282347		1.61281	4.17719	-0.00527501		1.61281	4.16198	-0.00779033		1.61281	4.1818	-0.00225306		1.61281	4.17364	-0.0158787		1.61281	4.19067	0.0107288		1.61281	4.16028	0.00959039		1.61281	4.17281	-0.0181258		1.61281	4.16465	-0.0185549		1.61281	4.16982	-0.0165641		1.61281	4.23265	-0.00841022
1.62001	4.16926	-0.0277102		1.62001	4.17572	-0.00674129		1.62001	4.16236	-0.00740886		1.62001	4.18269	-0.00135899		1.62001	4.17364	-0.0158787		1.62001	4.18674	0.00680089		1.62001	4.15671	0.00602007		1.62001	4.17326	-0.0176787		1.62001	4.16439	-0.0188112		1.62001	4.17036	-0.0160158		1.62001	4.2293	-0.011754
1.62721	4.16937	-0.0276029		1.62721	4.17385	-0.00861883		1.62721	4.16322	-0.00655055		1.62721	4.18303	-0.00101924		1.62721	4.17331	-0.0162125		1.62721	4.18224	0.00230074		1.62721	4.15429	0.00360012		1.62721	4.17413	-0.0168145		1.62721	4.16452	-0.0186801		1.62721	4.17134	-0.0150442		1.62721	4.22671	-0.0143468
1.63441	4.16903	-0.0279367		1.63441	4.17178	-0.0106812		1.63441	4.16436	-0.0054121		1.63441	4.18257	-0.00147819		1.63441	4.17271	-0.0168145		1.63441	4.17776	-0.00218749		1.63441	4.15327	0.00258088		1.63441	4.17547	-0.0154734		1.63441	4.16511	-0.018096		1.63441	4.17263	-0.0137508		1.63441	4.22519	-0.0158668
1.64161	4.1684	-0.0285685		1.64161	4.16982	-0.0126421		1.64161	4.16555	-0.00421405		1.64161	4.18122	-0.00282526		1.64161	4.17203	-0.017494		1.64161	4.17386	-0.00607967		1.64161	4.15376	0.00306964		1.64161	4.1773	-0.0136375		1.64161	4.16605	-0.0171483		1.64161	4.17418	-0.0122011		1.64161	4.22485	-0.0162065
1.64881	4.1677	-0.0292718		1.64881	4.16831	-0.0141501		1.64881	4.16661	-0.00315905		1.64881	4.17911	-0.00493527		1.64881	4.17147	-0.0180542		1.64881	4.17101	-0.00893474		1.64881	4.15564	0.00494719		1.64881	4.17957	-0.0113726		1.64881	4.16712	-0.0160873		1.64881	4.17594	-0.0104368		1.64881	4.22556	-0.0154912
1.65601	4.16723	-0.0297427		1.65601	4.1676	-0.0148594		1.65601	4.1675	-0.00227094		1.65601	4.17662	-0.0074327		1.65601	4.17118	-0.0183403		1.65601	4.16936	-0.0105798		1.65601	4.1586	0.0079155		1.65601	4.18209	-0.00884533		1.65601	4.16797	-0.015229		1.65601	4.17792	-0.0084579		1.65601	4.22695	-0.0141025
1.66321	4.16723	-0.0297427		1.66321	4.16793	-0.0145376		1.66321	4.1683	-0.00147224		1.66321	4.17414	-0.00990629		1.66321	4.17128	-0.018239		1.66321	4.16879	-0.011152		1.66321	4.16228	0.0115871		1.66321	4.18462	-0.00632405		1.66321	4.1684	-0.0147998		1.66321	4.18003	-0.00635386		1.66321	4.22851	-0.0125468
1.67041	4.16779	-0.0291824		1.67041	4.16931	-0.0131547		1.67041	4.16906	-0.000703335		1.67041	4.17206	-0.0119925		1.67041	4.17181	-0.0177085		1.67041	4.16889	-0.0110567		1.67041	4.16633	0.0156403		1.67041	4.18682	-0.00411868		1.67041	4.16839	-0.0148118		1.67041	4.18218	-0.00419617		1.67041	4.22977	-0.0112891
1.67761	4.16886	-0.0281096		1.67761	4.1716	-0.01086		1.67761	4.16968	-8.9407e-05		1.67761	4.17057	-0.0134826		1.67761	4.17268	-0.0168443		1.67761	4.16916	-0.0107825		1.67761	4.17048	0.0197947		1.67761	4.18842	-0.00251532		1.67761	4.16807	-0.0151336		1.67761	4.18441	-0.00197291		1.67761	4.23048	-0.0105798
1.68481	4.17025	-0.0267208		1.68481	4.17453	-0.00793338		1.68481	4.16993	0.000160933		1.68481	4.16977	-0.0142813		1.68481	4.17368	-0.015837		1.68481	4.1692	-0.0107408		1.68481	4.1745	0.0238121		1.68481	4.18929	-0.00165105		1.68481	4.16757	-0.0156343		1.68481	4.18678	0.000399351		1.68481	4.23059	-0.0104666
1.69201	4.17176	-0.0252068		1.69201	4.17778	-0.00467896		1.69201	4.16967	-0.000101328		1.69201	4.16968	-0.0143647		1.69201	4.17454	-0.0149786		1.69201	4.16875	-0.0111938		1.69201	4.17808	0.0273883		1.69201	4.18939	-0.00154972		1.69201	4.16702	-0.0161827		1.69201	4.18937	0.00299215		1.69201	4.23028	-0.0107706
1.69921	4.17315	-0.023824		1.69921	4.18108	-0.00138879		1.69921	4.169	-0.0007689		1.69921	4.17023	-0.0138164		1.69921	4.17496	-0.0145614		1.69921	4.16772	-0.0122249		1.69921	4.18095	0.0302613		1.69921	4.18885	-0.00209212		1.69921	4.1666	-0.0166059		1.69921	4.19209	0.00571012		1.69921	4.2299	-0.011152
1.70641	4.1741	-0.0228763		1.70641	4.18409	0.00162125		1.70641	4.16821	-0.00156164		1.70641	4.17118	-0.0128686		1.70641	4.17479	-0.0147283		1.70641	4.1662	-0.0137389		1.70641	4.18297	0.0322819		1.70641	4.18789	-0.00305176		1.70641	4.16653	-0.0166714		1.70641	4.19471	0.00832677		1.70641	4.22982	-0.0112355
1.71361	4.1743	-0.0226676		1.71361	4.18658	0.00411868		1.71361	4.16759	-0.00218153		1.71361	4.17221	-0.0118375		1.71361	4.17406	-0.0154614		1.71361	4.16443	-0.0155151		1.71361	4.18416	0.033468		1.71361	4.18677	-0.00417233		1.71361	4.16703	-0.0161767		1.71361	4.19699	0.0106096		1.71361	4.23042	-0.0106394
1.72081	4.17361	-0.0233591		1.72081	4.18838	0.00591278		1.72081	4.16731	-0.00245571		1.72081	4.17311	-0.0109375		1.72081	4.17297	-0.0165462		1.72081	4.16272	-0.0172198		1.72081	4.18462	0.033927		1.72081	4.18571	-0.00522733		1.72081	4.16817	-0.0150323		1.72081	4.19883	0.0124454		1.72081	4.23192	-0.00913143
1.72801	4.17219	-0.0247836		1.72801	4.18943	0.00696778		1.72801	4.16748	-0.00228882		1.72801	4.17382	-0.0102282		1.72801	4.17182	-0.0177026		1.72801	4.16151	-0.0184298		1.72801	4.18451	0.0338197		1.72801	4.18482	-0.00611544		1.72801	4.1699	-0.0133038		1.72801	4.20015	0.0137687		1.72801	4.23439	-0.00666976
1.73521	4.17048	-0.0264943		1.73521	4.18978	0.00731945		1.73521	4.16819	-0.00157952		1.73521	4.17445	-0.00959635		1.73521	4.17094	-0.0185788		1.73521	4.16115	-0.0187933		1.73521	4.18397	0.0332773		1.73521	4.18403	-0.00690818		1.73521	4.172	-0.0111997		1.73521	4.20091	0.0145257		1.73521	4.23766	-0.00339746
1.74241	4.16896	-0.0280082		1.74241	4.1896	0.00714064		1.74241	4.16945	-0.000315905		1.74241	4.17519	-0.00885725		1.74241	4.17069	-0.0188351		1.74241	4.16185	-0.01809		1.74241	4.18309	0.0324011		1.74241	4.18316	-0.00777841		1.74241	4.17426	-0.0089407		1.74241	4.20108	0.0147045		1.74241	4.24142	0.000363588
1.74961	4.16801	-0.0289619		1.74961	4.18907	0.00660419		1.74961	4.17112	0.00134707		1.74961	4.17613	-0.0079155		1.74961	4.17123	-0.0182867		1.74961	4.1636	-0.0163376		1.74961	4.18204	0.031352		1.74961	4.18205	-0.00888705		1.74961	4.17655	-0.00665188		1.74961	4.20082	0.0144422		1.74961	4.24528	0.00422001
1.75681	4.16774	-0.0292301		1.75681	4.18838	0.00591278		1.75681	4.17277	0.00299811		1.75681	4.17722	-0.00682473		1.75681	4.17261	-0.0169098		1.75681	4.16621	-0.0137329		1.75681	4.181	0.030309		1.75681	4.1806	-0.0103414		1.75681	4.17879	-0.00441074		1.75681	4.20039	0.0140071		1.75681	4.2488	0.0077486
1.76401	4.16815	-0.0288248		1.76401	4.18768	0.00521541		1.76401	4.17391	0.00414252		1.76401	4.17841	-0.0056386		1.76401	4.17463	-0.0148952		1.76401	4.16936	-0.0105798		1.76401	4.18009	0.029397		1.76401	4.1787	-0.0122368		1.76401	4.181	-0.00219941		1.76401	4.20012	0.0137389		1.76401	4.2516	0.0105441
1.77121	4.16915	-0.0278175		1.77121	4.18709	0.00462532		1.77121	4.17417	0.00439882		1.77121	4.17956	-0.00449419		1.77121	4.17702	-0.0125051		1.77121	4.17275	-0.00718832		1.77121	4.17933	0.028646		1.77121	4.17635	-0.0145853		1.77121	4.18321	5.96046e-06		1.77121	4.20018	0.0137985		1.77121	4.25338	0.0123262
1.77841	4.17059	-0.026381		1.77841	4.18668	0.00421405		1.77841	4.17352	0.00374913		1.77841	4.18054	-0.00351071		1.77841	4.17952	-0.0100017		1.77841	4.17615	-0.00379086		1.77841	4.17866	0.0279725		1.77841	4.17367	-0.0172734		1.77841	4.18538	0.00217557		1.77841	4.20058	0.0141978		1.77841	4.254	0.0129461
1.78561	4.17221	-0.0247657		1.78561	4.18653	0.004071		1.78561	4.17216	0.00239015		1.78561	4.18118	-0.00286698		1.78561	4.18187	-0.00764728		1.78561	4.1793	-0.00063777		1.78561	4.17799	0.0273049		1.78561	4.17094	-0.0200033		1.78561	4.18745	0.00424385		1.78561	4.20124	0.0148594		1.78561	4.25341	0.012356
1.79281	4.1737	-0.0232697		1.79281	4.1867	0.00423193		1.79281	4.17045	0.000685453		1.79281	4.18128	-0.00277162		1.79281	4.18385	-0.00567436		1.79281	4.18198	0.00203848		1.79281	4.17736	0.0266671		1.79281	4.1686	-0.0223398		1.79281	4.18928	0.00607967		1.79281	4.20211	0.0157297		1.79281	4.25172	0.0106633
1.80001	4.17491	-0.0220656		1.80001	4.1871	0.00463128		1.80001	4.16878	-0.000989437		1.80001	4.18072	-0.00332594		1.80001	4.18522	-0.00430346		1.80001	4.18396	0.00401735		1.80001	4.17688	0.0261962		1.80001	4.16707	-0.0238657		1.80001	4.19078	0.00758171		1.80001	4.2031	0.0167191		1.80001	4.24911	0.00805855
1.80721	4.17581	-0.0211656		1.80721	4.18752	0.00506043		1.80721	4.16752	-0.0022471		1.80721	4.17956	-0.00449419		1.80721	4.18579	-0.00373125		1.80721	4.18513	0.00519156		1.80721	4.17672	0.0260293		1.80721	4.16663	-0.0243068		1.80721	4.19189	0.00869036		1.80721	4.20401	0.0176311		1.80721	4.24586	0.00480413
1.81441	4.17656	-0.0204146		1.81441	4.18773	0.00526309		1.81441	4.16702	-0.00274777		1.81441	4.17796	-0.00608563		1.81441	4.18548	-0.00404119		1.81441	4.18557	0.00562668		1.81441	4.17688	0.0261903		1.81441	4.16739	-0.0235498		1.81441	4.19254	0.00934005		1.81441	4.20458	0.0181973		1.81441	4.24224	0.00118017
1.82161	4.17728	-0.0196874		1.82161	4.18751	0.00504255		1.82161	4.1675	-0.00227094		1.82161	4.17613	-0.0079155		1.82161	4.18429	-0.00523329		1.82161	4.18547	0.00552535		1.82161	4.17729	0.0266016		1.82161	4.16929	-0.0216484		1.82161	4.19266	0.00945926		1.82161	4.20458	0.0182033		1.82161	4.23846	-0.00259876
1.82881	4.17801	-0.0189602		1.82881	4.18684	0.00438094		1.82881	4.16889	-0.000876188		1.82881	4.1742	-0.00985265		1.82881	4.18233	-0.00719428		1.82881	4.18507	0.005126		1.82881	4.17784	0.0271499		1.82881	4.17218	-0.0187576		1.82881	4.19218	0.00897646		1.82881	4.20393	0.0175536		1.82881	4.23475	-0.00630617
1.83601	4.17863	-0.0183403		1.83601	4.18583	0.00336766		1.83601	4.17088	0.00110865		1.83601	4.17224	-0.0118136		1.83601	4.17984	-0.00967979		1.83601	4.18456	0.00461936		1.83601	4.1784	0.0277162		1.83601	4.17577	-0.0151694		1.83601	4.19103	0.00782609		1.83601	4.20265	0.0162721		1.83601	4.23139	-0.00966191
1.84321	4.17897	-0.0180066		1.84321	4.18463	0.00216961		1.84321	4.17297	0.00320077		1.84321	4.17036	-0.0136852		1.84321	4.17718	-0.0123441		1.84321	4.18409	0.00414252		1.84321	4.1788	0.0281155		1.84321	4.1797	-0.0112355		1.84321	4.18925	0.00604391		1.84321	4.20079	0.0144064		1.84321	4.22869	-0.012368
1.85041	4.17885	-0.0181198		1.85041	4.18341	0.000941753		1.85041	4.17468	0.00491142		1.85041	4.16878	-0.0152707		1.85041	4.17467	-0.0148535		1.85041	4.1837	0.00375509		1.85041	4.1788	0.0281096		1.85041	4.18364	-0.00730157		1.85041	4.1869	0.00370145		1.85041	4.19838	0.0120044		1.85041	4.22689	-0.014168
1.85761	4.17824	-0.0187337		1.85761	4.1823	-0.000160933		1.85761	4.17564	0.00587106		1.85761	4.16769	-0.0163615		1.85761	4.17264	-0.016886		1.85761	4.18341	0.00346899		1.85761	4.17817	0.0274837		1.85761	4.1873	-0.00363588		1.85761	4.18412	0.000917912		1.85761	4.19554	0.00916123		1.85761	4.22611	-0.0149429
1.86481	4.1772	-0.0197709		1.86481	4.1815	-0.000959635		1.86481	4.17567	0.00590086		1.86481	4.16725	-0.0168025		1.86481	4.17128	-0.018245		1.86481	4.18313	0.00318289		1.86481	4.17686	0.0261664		1.86481	4.19055	-0.00038743		1.86481	4.18098	-0.00222325		1.86481	4.19247	0.00609159		1.86481	4.22636	-0.0146985
1.87201	4.17598	-0.0209928		1.87201	4.18119	-0.00127554		1.87201	4.17473	0.00495911		1.87201	4.16744	-0.0166059		1.87201	4.17072	-0.0188053		1.87201	4.18267	0.00272393		1.87201	4.175	0.0243068		1.87201	4.19328	0.0023365		1.87201	4.17761	-0.00559688		1.87201	4.18952	0.00314116		1.87201	4.2275	-0.0135601
1.87921	4.175	-0.0219703		1.87921	4.18141	-0.001055		1.87921	4.17294	0.00317097		1.87921	4.1682	-0.0158489		1.87921	4.17091	-0.0186086		1.87921	4.1818	0.0018537		1.87921	4.17291	0.0222206		1.87921	4.19534	0.00439882		1.87921	4.17418	-0.00902414		1.87921	4.18704	0.000655651		1.87921	4.22934	-0.0117123
1.88641	4.1747	-0.0222743		1.88641	4.18199	-0.000476837		1.88641	4.17053	0.000756979		1.88641	4.16946	-0.0145912		1.88641	4.17161	-0.0179112		1.88641	4.18034	0.000393391		1.88641	4.17091	0.0202239		1.88641	4.19655	0.0056088		1.88641	4.17098	-0.0122249		1.88641	4.18521	-0.00116825		1.88641	4.23161	-0.00944734
1.89361	4.17547	-0.0215054		1.89361	4.18262	0.000160933		1.89361	4.16775	-0.0020206		1.89361	4.17119	-0.0128567		1.89361	4.17231	-0.0172079		1.89361	4.17821	-0.0017345		1.89361	4.16927	0.0185788		1.89361	4.19679	0.00585318		1.89361	4.1683	-0.0149071		1.89361	4.18412	-0.00225902		1.89361	4.23396	-0.00709891
1.90081	4.17749	-0.0194848		1.90081	4.18294	0.000476837		1.90081	4.16487	-0.00489354		1.90081	4.17327	-0.0107765		1.90081	4.17244	-0.0170767		1.90081	4.17551	-0.00443459		1.90081	4.16816	0.0174761		1.90081	4.19604	0.00510216		1.90081	4.16641	-0.0167906		1.90081	4.18373	-0.00264645		1.90081	4.23608	-0.00497699
1.90801	4.18062	-0.0163555		1.90801	4.1827	0.000232458		1.90801	4.1622	-0.00756979		1.90801	4.17541	-0.00863671		1.90801	4.17157	-0.0179529		1.90801	4.17248	-0.0074625		1.90801	4.16775	0.0170588		1.90801	4.19437	0.00343323		1.90801	4.16545	-0.0177562		1.90801	4.18403	-0.00235438		1.90801	4.23774	-0.00331402
1.91521	4.1844	-0.0125706		1.91521	4.18179	-0.000673532		1.91521	4.16003	-0.00973344		1.91521	4.17722	-0.00683069		1.91521	4.16956	-0.0199616		1.91521	4.16944	-0.0105023		1.91521	4.16808	0.0173867		1.91521	4.19193	0.000989437		1.91521	4.16545	-0.0177562		1.91521	4.18497	-0.00141263		1.91521	4.23886	-0.00219345
1.92241	4.18823	-0.00873804		1.92241	4.18024	-0.00222325		1.92241	4.15868	-0.0110924		1.92241	4.17839	-0.00566244		1.92241	4.16662	-0.0229001		1.92241	4.1667	-0.0132382		1.92241	4.16913	0.0184417		1.92241	4.18886	-0.0020802		1.92241	4.16636	-0.0168383		1.92241	4.18648	9.53674e-05		1.92241	4.23943	-0.00162721
1.92961	4.1915	-0.00547171		1.92961	4.17808	-0.0043869		1.92961	4.15835	-0.0114203		1.92961	4.17888	-0.00517368		1.92961	4.16314	-0.026381		1.92961	4.16458	-0.0153661		1.92961	4.17076	0.0200748		1.92961	4.18541	-0.00553131		1.92961	4.16815	-0.0150502		1.92961	4.18842	0.00204444		1.92961	4.23952	-0.00153184
1.93681	4.19375	-0.00322461		1.93681	4.17539	-0.00706911		1.93681	4.15917	-0.0105977		1.93681	4.17883	-0.00521541		1.93681	4.15964	-0.0298798		1.93681	4.16325	-0.0166953		1.93681	4.17273	0.0220418		1.93681	4.18195	-0.00899434		1.93681	4.17069	-0.012511		1.93681	4.19074	0.00436306		1.93681	4.23924	-0.00181198
1.94401	4.19477	-0.00219941		1.94401	4.17237	-0.0100911		1.94401	4.16121	-0.00855327		1.94401	4.17842	-0.00563264		1.94401	4.15669	-0.0328302		1.94401	4.16288	-0.0170648		1.94401	4.17477	0.0240803		1.94401	4.17892	-0.0120223		1.94401	4.1738	-0.00939965		1.94401	4.19338	0.00699759		1.94401	4.23867	-0.00239015
1.95121	4.19456	-0.00240803		1.95121	4.16928	-0.0131845		1.95121	4.16445	-0.00531673		1.95121	4.17769	-0.00635982		1.95121	4.15485	-0.034672		1.95121	4.1635	-0.0164449		1.95121	4.17662	0.025928		1.95121	4.17672	-0.0142217		1.95121	4.1772	-0.00600219		1.95121	4.19624	0.00986457		1.95121	4.23778	-0.00327826
1.95841	4.19333	-0.00364184		1.95841	4.16634	-0.0161231		1.95841	4.16874	-0.0010252		1.95841	4.17665	-0.00739694		1.95841	4.15452	-0.0349998		1.95841	4.16501	-0.0149369		1.95841	4.17809	0.0274062		1.95841	4.17553	-0.0154138		1.95841	4.18051	-0.00268817		1.95841	4.19914	0.0127554		1.95841	4.2365	-0.00455976
1.96561	4.19145	-0.00551939		1.96561	4.16374	-0.0187278		1.96561	4.17378	0.00401139		1.96561	4.17543	-0.00861883		1.96561	4.15581	-0.0337124		1.96561	4.16726	-0.0126839		1.96561	4.17907	0.0283778		1.96561	4.17534	-0.0156045		1.96561	4.18341	0.000202656		1.96561	4.20173	0.0153542		1.96561	4.23465	-0.0064075
1.97281	4.18938	-0.00759363		1.97281	4.16161	-0.0208497		1.97281	4.1791	0.00933409		1.97281	4.17427	-0.00977516		1.97281	4.1585	-0.0310183		1.97281	4.17005	-0.00988841		1.97281	4.17943	0.0287414		1.97281	4.17608	-0.0148594		1.97281	4.18561	0.00240207		1.97281	4.20372	0.017345		1.97281	4.23216	-0.00889301
1.98001	4.18745	-0.00952482		1.98001	4.16018	-0.0222802		1.98001	4.18424	0.014472		1.98001	4.1734	-0.0106454		1.98001	4.16212	-0.0274003		1.98001	4.1732	-0.00674129		1.98001	4.17911	0.0284195		1.98001	4.17773	-0.0132143		1.98001	4.18693	0.00372529		1.98001	4.20488	0.0184953		1.98001	4.22907	-0.0119865
1.98721	4.18581	-0.011158		1.98721	4.15971	-0.0227571		1.98721	4.18875	0.0189781		1.98721	4.17287	-0.0111818		1.98721	4.1661	-0.0234187		1.98721	4.17646	-0.00348091		1.98721	4.17813	0.027442		1.98721	4.18017	-0.0107706		1.98721	4.18729	0.00408292		1.98721	4.20507	0.018692		1.98721	4.2255	-0.0155509
1.99441	4.18443	-0.0125408		1.99441	4.16042	-0.0220478		1.99441	4.19224	0.022471		1.99441	4.17266	-0.0113904		1.99441	4.17002	-0.0194967		1.99441	4.17956	-0.00038743		1.99441	4.17668	0.0259876		1.99441	4.18317	-0.00776649		1.99441	4.18664	0.00343919		1.99441	4.20431	0.0179291		1.99441	4.2217	-0.0193536
2.00161	4.18322	-0.0137508		2.00161	4.1624	-0.0200629		2.00161	4.19441	0.0246465		2.00161	4.17283	-0.0112236		2.00161	4.17359	-0.0159264		2.00161	4.1822	0.00225902		2.00161	4.17501	0.0243187		2.00161	4.18639	-0.00455379		2.00161	4.18507	0.00187159		2.00161	4.20267	0.0162899		2.00161	4.2179	-0.0231564
2.00881	4.18212	-0.0148475		2.00881	4.16569	-0.0167787		2.00881	4.19515	0.0253856		2.00881	4.17359	-0.0104606		2.00881	4.17669	-0.0128329		2.00881	4.18417	0.00423193		2.00881	4.17334	0.0226498		2.00881	4.1894	-0.00154376		2.00881	4.18277	-0.000435114		2.00881	4.20036	0.0139832		2.00881	4.21439	-0.0266671
2.01601	4.18116	-0.0158072		2.01601	4.17016	-0.0123084		2.01601	4.1946	0.0248313		2.01601	4.17517	-0.00888109		2.01601	4.17926	-0.010258		2.01601	4.18527	0.00532866		2.01601	4.17175	0.0210583		2.01601	4.19189	0.000953674		2.01601	4.18002	-0.00318289		2.01601	4.19762	0.0112355		2.01601	4.2115	-0.0295579
2.02321	4.1804	-0.0165701		2.02321	4.17559	-0.00687242		2.02321	4.19306	0.0232875		2.02321	4.17758	-0.00647306		2.02321	4.18134	-0.00818372		2.02321	4.18531	0.00537038		2.02321	4.17023	0.0195444		2.02321	4.19368	0.00273585		2.02321	4.17715	-0.00604987		2.02321	4.19463	0.00824928		2.02321	4.20949	-0.0315607
2.03041	4.17987	-0.0171006		2.03041	4.18157	-0.00089407		2.03041	4.19091	0.0211418		2.03041	4.18053	-0.00351667		2.03041	4.18295	-0.00657439		2.03041	4.18417	0.00422597		2.03041	4.16877	0.0180781		2.03041	4.19459	0.0036478		2.03041	4.17441	-0.00879169		2.03041	4.19148	0.00510216		2.03041	4.20856	-0.0324905
2.03761	4.17958	-0.0173867		2.03761	4.18751	0.00504255		2.03761	4.18846	0.018692		2.03761	4.1836	-0.000452995		2.03761	4.18413	-0.00539422		2.03761	4.18189	0.00194311		2.03761	4.16744	0.0167489		2.03761	4.19449	0.00354648		2.03761	4.17193	-0.0112772		2.03761	4.1882	0.0018239		2.03761	4.20878	-0.0322759
2.04481	4.17952	-0.0174522		2.04481	4.19282	0.0103533		2.04481	4.18592	0.0161529		2.04481	4.1863	0.00225305		2.04481	4.18487	-0.00464916		2.04481	4.17871	-0.00123382		2.04481	4.16637	0.015682		2.04481	4.19338	0.00243783		2.04481	4.16976	-0.0134408		2.04481	4.18483	-0.00154972		2.04481	4.21019	-0.0308633
2.05201	4.17956	-0.0174105		2.05201	4.19707	0.0146091		2.05201	4.18358	0.0138164		2.05201	4.18822	0.00416636		2.05201	4.18518	-0.00434518		2.05201	4.17508	-0.00486374		2.05201	4.16567	0.0149786		2.05201	4.19138	0.000441074		2.05201	4.16802	-0.0151873		2.05201	4.18142	-0.00495911		2.05201	4.21279	-0.0282645
2.05921	4.17947	-0.0174999		2.05921	4.20004	0.0175714		2.05921	4.1817	0.0119328		2.05921	4.18891	0.00485778		2.05921	4.18506	-0.00445843		2.05921	4.17145	-0.00849366		2.05921	4.16543	0.0147462		2.05921	4.18875	-0.00219345		2.05921	4.16682	-0.0163794		2.05921	4.1781	-0.00827909		2.05921	4.21653	-0.0245273
2.06641	4.17891	-0.0180662		2.06641	4.20157	0.0191092		2.06641	4.18037	0.0106037		2.06641	4.18797	0.00391602		2.06641	4.18468	-0.0048399		2.06641	4.16825	-0.0116944		2.06641	4.16576	0.015074		2.06641	4.18575	-0.0051856		2.06641	4.16637	-0.0168324		2.06641	4.17507	-0.011313		2.06641	4.22122	-0.0198364
2.07361	4.17753	-0.019443		2.07361	4.20162	0.0191569		2.07361	4.17953	0.00976324		2.07361	4.18519	0.00114441		2.07361	4.18426	-0.00525713		2.07361	4.16591	-0.0140369		2.07361	4.16678	0.0160873		2.07361	4.18264	-0.00829697		2.07361	4.16682	-0.0163853		2.07361	4.17261	-0.0137746		2.07361	4.22654	-0.0145197
2.08081	4.17519	-0.0217855		2.08081	4.20019	0.0177264		2.08081	4.179	0.00923276		2.08081	4.18073	-0.00331998		2.08081	4.18408	-0.0054419		2.08081	4.16485	-0.0150919		2.08081	4.16844	0.0177503		2.08081	4.17957	-0.0113666		2.08081	4.16828	-0.014925		2.08081	4.17109	-0.0152946		2.08081	4.2321	-0.00895262
2.08801	4.172	-0.0249684		2.08801	4.19742	0.0149548		2.08801	4.1787	0.00892878		2.08801	4.17508	-0.0089705		2.08801	4.18436	-0.00516176		2.08801	4.16543	-0.0145137		2.08801	4.17054	0.0198483		2.08801	4.17672	-0.0142217		2.08801	4.17088	-0.0123262		2.08801	4.17082	-0.0155568		2.08801	4.2375	-0.00355244
2.09521	4.16837	-0.0285983		2.09521	4.19355	0.0110865		2.09521	4.17857	0.00879765		2.09521	4.1689	-0.0151455		2.09521	4.18527	-0.00425577		2.09521	4.16777	-0.0121772		2.09521	4.1726	0.0219107		2.09521	4.17417	-0.0167668		2.09521	4.17473	-0.00846982		2.09521	4.17199	-0.0143945		2.09521	4.24234	0.0012815
2.10241	4.16487	-0.0320971		2.10241	4.18886	0.00639558		2.10241	4.17854	0.0087738		2.10241	4.16287	-0.0211835		2.10241	4.18686	-0.00266433		2.10241	4.17165	-0.00829101		2.10241	4.17408	0.0233948		2.10241	4.17204	-0.0189006		2.10241	4.17986	-0.00334382		2.10241	4.17452	-0.0118554		2.10241	4.24624	0.0051856
2.10961	4.16215	-0.034821		2.10961	4.18367	0.00120401		2.10961	4.17847	0.00870228		2.10961	4.15754	-0.0265062		2.10961	4.18906	-0.000464916		2.10961	4.17659	-0.00334978		2.10961	4.17457	0.0238836		2.10961	4.17038	-0.0205636		2.10961	4.18605	0.0028491		2.10961	4.1782	-0.00818372		2.10961	4.24895	0.00789165
2.11681	4.16075	-0.0362217		2.11681	4.17833	-0.0041306		2.11681	4.1782	0.00843406		2.11681	4.15341	-0.0306427		2.11681	4.19164	0.00212193		2.11681	4.18195	0.00200868		2.11681	4.17387	0.0231862		2.11681	4.16928	-0.0216603		2.11681	4.19288	0.00967383		2.11681	4.18261	-0.00376701		2.11681	4.25041	0.00935197
2.12401	4.16101	-0.0359595		2.12401	4.17332	-0.00914335		2.12401	4.17776	0.00799298		2.12401	4.15081	-0.0332356		2.12401	4.19434	0.00481606		2.12401	4.18708	0.00714064		2.12401	4.17203	0.0213385		2.12401	4.16885	-0.0220895		2.12401	4.19974	0.0165343		2.12401	4.18732	0.000935793		2.12401	4.25075	0.00969172
2.13121	4.16299	-0.0339806		2.13121	4.16906	-0.0133991		2.13121	4.17737	0.00759959		2.13121	4.14996	-0.0340879		2.13121	4.19689	0.00737309		2.13121	4.19133	0.0113904		2.13121	4.16925	0.0185609		2.13121	4.16915	-0.0217855		2.13121	4.20599	0.0227869		2.13121	4.19183	0.00545382		2.13121	4.25028	0.0092268
2.13841	4.16645	-0.0305235		2.13841	4.16589	-0.0165761		2.13841	4.17733	0.00756383		2.13841	4.15078	-0.0332713		2.13841	4.19924	0.00971556		2.13841	4.1942	0.0142574		2.13841	4.16593	0.0152409		2.13841	4.17009	-0.0208497		2.13841	4.211	0.0277996		2.13841	4.19578	0.00939965		2.13841	4.24935	0.00829697
2.14561	4.17092	-0.0260472		2.14561	4.16387	-0.0185907		2.14561	4.17789	0.00811815		2.14561	4.15302	-0.0310302		2.14561	4.20136	0.0118375		2.14561	4.19538	0.0154376		2.14561	4.16258	0.0118911		2.14561	4.17145	-0.0194907		2.14561	4.21432	0.0311196		2.14561	4.1989	0.0125229		2.14561	4.24823	0.00717044
2.15281	4.17581	-0.0211656		2.15281	4.16296	-0.0195026		2.15281	4.17908	0.00931621		2.15281	4.15632	-0.027734		2.15281	4.20324	0.013721		2.15281	4.19488	0.0149369		2.15281	4.15971	0.00901818		2.15281	4.17295	-0.0179946		2.15281	4.21569	0.0324845		2.15281	4.20112	0.0147402		2.15281	4.24711	0.00604987
2.16001	4.18042	-0.0165522		2.16001	4.16293	-0.0195324		2.16001	4.18083	0.0110626		2.16001	4.16035	-0.0236988		2.16001	4.20478	0.0152588		2.16001	4.19307	0.0131309		2.16001	4.15769	0.00699759		2.16001	4.17432	-0.0166178		2.16001	4.21515	0.0319421		2.16001	4.20246	0.0160813		2.16001	4.24612	0.00506043
2.16721	4.18416	-0.012815		2.16721	4.16344	-0.0190258		2.16721	4.18298	0.0132144		2.16721	4.16486	-0.0191867		2.16721	4.20587	0.0163496		2.16721	4.19056	0.0106215		2.16721	4.15663	0.00593662		2.16721	4.17536	-0.0155747		2.16721	4.21304	0.0298381		2.16721	4.20299	0.0166118		2.16721	4.24536	0.00430942
2.17441	4.18655	-0.0104249		2.17441	4.16402	-0.0184476		2.17441	4.18537	0.0156045		2.17441	4.16963	-0.0144184		2.17441	4.20641	0.016886		2.17441	4.18803	0.00808835		2.17441	4.15642	0.00572801		2.17441	4.17595	-0.0149906		2.17441	4.20989	0.026685		2.17441	4.20277	0.0163853		2.17441	4.24496	0.0039041
2.18161	4.18742	-0.00955462		2.18161	4.16418	-0.0182807		2.18161	4.18779	0.0180185		2.18161	4.1744	-0.00964999		2.18161	4.2063	0.0167787		2.18161	4.18604	0.00609756		2.18161	4.15682	0.00613332		2.18161	4.176	-0.0149429		2.18161	4.20628	0.0230789		2.18161	4.20179	0.0154138		2.18161	4.24491	0.00385642
2.18881	4.18684	-0.0101328		2.18881	4.16363	-0.0188291		2.18881	4.18993	0.0201583		2.18881	4.17889	-0.00516176		2.18881	4.20541	0.0158906		2.18881	4.18496	0.00501275		2.18881	4.15754	0.00685453		2.18881	4.17554	-0.0153959		2.18881	4.2028	0.019598		2.18881	4.20011	0.0137329		2.18881	4.24523	0.00417829
2.19601	4.18505	-0.0119209		2.19601	4.16235	-0.0201166		2.19601	4.19148	0.021714		2.19601	4.18279	-0.00125766		2.19601	4.20359	0.0140727		2.19601	4.18488	0.00494123		2.19601	4.15832	0.00763535		2.19601	4.1747	-0.0162423		2.19601	4.19986	0.0166595		2.19601	4.1978	0.0114202		2.19601	4.24591	0.00485182
2.20321	4.18237	-0.0146031		2.20321	4.16051	-0.0219524		2.20321	4.19232	0.0225484		2.20321	4.18589	0.00183582		2.20321	4.20082	0.011301		2.20321	4.18576	0.00581741		2.20321	4.15905	0.00836253		2.20321	4.17358	-0.0173628		2.20321	4.19765	0.0144422		2.20321	4.19502	0.00864267		2.20321	4.24694	0.00588298
2.21041	4.1791	-0.0178754		2.21041	4.1584	-0.0240624		2.21041	4.19253	0.0227571		2.21041	4.18802	0.00397563		2.21041	4.19729	0.00777245		2.21041	4.18736	0.00742078		2.21041	4.15969	0.0090003		2.21041	4.17231	-0.0186324		2.21041	4.19599	0.0127912		2.21041	4.19204	0.00566244		2.21041	4.24834	0.00728369
2.21761	4.17559	-0.0213802		2.21761	4.15621	-0.0262499		2.21761	4.19239	0.02262		2.21761	4.18909	0.00504255		2.21761	4.19338	0.00385642		2.21761	4.18936	0.00941753		2.21761	4.16029	0.00960231		2.21761	4.17102	-0.0199199		2.21761	4.19454	0.0113368		2.21761	4.18907	0.00269413		2.21761	4.25003	0.0089705
2.22481	4.17227	-0.0247061		2.22481	4.15415	-0.0283182		2.22481	4.19215	0.0223815		2.22481	4.18897	0.00491738		2.22481	4.18945	-7.15256e-05		2.22481	4.19139	0.0114441		2.22481	4.16095	0.010258		2.22481	4.16985	-0.0210941		2.22481	4.19286	0.00966191		2.22481	4.18631	-7.15256e-05		2.22481	4.25183	0.0107765
2.23201	4.16945	-0.0275195		2.23201	4.15241	-0.0300527		2.23201	4.19197	0.0222027		2.23201	4.18759	0.00354052		2.23201	4.18583	-0.00369549		2.23201	4.19311	0.0131667		2.23201	4.1617	0.011009		2.23201	4.16894	-0.0220001		2.23201	4.19065	0.00744462		2.23201	4.18391	-0.00247359		2.23201	4.25347	0.0124156
2.23921	4.16735	-0.0296175		2.23921	4.15125	-0.031215		2.23921	4.19188	0.0221133		2.23921	4.18502	0.000971556		2.23921	4.1827	-0.00682473		2.23921	4.19432	0.0143766		2.23921	4.16255	0.0118613		2.23921	4.16841	-0.0225306		2.23921	4.18776	0.00455976		2.23921	4.18207	-0.00430942		2.23921	4.25463	0.013572
2.24641	4.166	-0.0309706		2.24641	4.15081	-0.031656		2.24641	4.19189	0.0221193		2.24641	4.1815	-0.00254512		2.24641	4.18021	-0.00931025		2.24641	4.19493	0.0149846		2.24641	4.16343	0.0127375		2.24641	4.16825	-0.0226915		2.24641	4.18434	0.00113249		2.24641	4.18097	-0.0054121		2.24641	4.25499	0.0139356
2.25361	4.16536	-0.0316083		2.25361	4.15112	-0.0313461		2.25361	4.19199	0.0222206		2.25361	4.17743	-0.00661612		2.25361	4.17848	-0.0110447		2.25361	4.19492	0.0149786		2.25361	4.16416	0.0134707		2.25361	4.16837	-0.0225663		2.25361	4.18071	-0.00249147		2.25361	4.18059	-0.00578761		2.25361	4.25434	0.0132799
2.26081	4.16542	-0.0315547		2.26081	4.15218	-0.0302851		2.26081	4.19207	0.0222981		2.26081	4.17315	-0.0108957		2.26081	4.17749	-0.0120342		2.26081	4.19433	0.0143886		2.26081	4.16446	0.0137687		2.26081	4.16867	-0.0222743		2.26081	4.1774	-0.00580549		2.26081	4.18075	-0.00562668		2.26081	4.25262	0.0115693
2.26801	4.16609	-0.0308812		2.26801	4.15403	-0.0284374		2.26801	4.19196	0.0221908		2.26801	4.16899	-0.0150561		2.26801	4.17709	-0.0124276		2.26801	4.19316	0.0132143		2.26801	4.16405	0.0133574		2.26801	4.16902	-0.0219226		2.26801	4.17492	-0.00828505		2.26801	4.18112	-0.00525713		2.26801	4.25001	0.00895858
2.27521	4.16723	-0.0297427		2.27521	4.15673	-0.0257373		2.27521	4.19147	0.0217021		2.27521	4.16525	-0.0187993		2.27521	4.1771	-0.0124216		2.27521	4.19148	0.0115335		2.27521	4.16275	0.012064		2.27521	4.16936	-0.0215769		2.27521	4.17365	-0.00954866		2.27521	4.18143	-0.00495315		2.27521	4.24685	0.00579357
2.28241	4.16856	-0.0284135		2.28241	4.16025	-0.0222147		2.28241	4.19052	0.0207484		2.28241	4.16227	-0.0217795		2.28241	4.17728	-0.0122368		2.28241	4.18944	0.00950098		2.28241	4.16063	0.00994205		2.28241	4.16963	-0.0213146		2.28241	4.17376	-0.00944138		2.28241	4.18152	-0.00485778		2.28241	4.24353	0.00247359
2.28961	4.1698	-0.0271738		2.28961	4.16435	-0.0181139		2.28961	4.18912	0.0193477		2.28961	4.16036	-0.0236869		2.28961	4.17753	-0.0119865		2.28961	4.1873	0.00735521		2.28961	4.15791	0.00722408		2.28961	4.16968	-0.021255		2.28961	4.17517	-0.00803471		2.28961	4.18139	-0.00499487		2.28961	4.24038	-0.000673532
2.29681	4.17077	-0.0262022		2.29681	4.16858	-0.0138879		2.29681	4.18736	0.0175953		2.29681	4.15974	-0.0243068		2.29681	4.17781	-0.0117123		2.29681	4.18526	0.00531673		2.29681	4.15499	0.0042975		2.29681	4.16948	-0.0214577		2.29681	4.17765	-0.00555515		2.29681	4.18102	-0.00536442		2.29681	4.2377	-0.00335574
2.30401	4.1714	-0.0255764		2.30401	4.17241	-0.0100553		2.30401	4.18533	0.0155628		2.30401	4.16045	-0.0235975		2.30401	4.17809	-0.0114262		2.30401	4.18351	0.00356436		2.30401	4.15229	0.00160337		2.30401	4.16903	-0.0219047		2.30401	4.18086	-0.00234246		2.30401	4.18046	-0.0059247		2.30401	4.23568	-0.00537038
2.31121	4.17162	-0.0253499		2.31121	4.17537	-0.00709295		2.31121	4.18308	0.0133097		2.31121	4.16238	-0.0216722		2.31121	4.17842	-0.0111043		2.31121	4.18214	0.00219941		2.31121	4.15035	-0.000333786		2.31121	4.1685	-0.0224352		2.31121	4.18442	0.00121593		2.31121	4.17981	-0.00657439		2.31121	4.23438	-0.00667572
2.31841	4.17135	-0.0256181		2.31841	4.17714	-0.00532866		2.31841	4.18065	0.0108778		2.31841	4.16535	-0.0187039		2.31841	4.17877	-0.0107467		2.31841	4.18118	0.00123978		2.31841	4.14958	-0.00110865		2.31841	4.16812	-0.0228167		2.31841	4.18791	0.00470281		2.31841	4.17927	-0.00711083		2.31841	4.23361	-0.00744462
2.32561	4.17054	-0.0264347		2.32561	4.17759	-0.00487566		2.32561	4.17805	0.00827908		2.32561	4.16911	-0.0149429		2.32561	4.17917	-0.0103533		2.32561	4.18054	0.000596046		2.32561	4.15016	-0.000524521		2.32561	4.16802	-0.0229239		2.32561	4.19099	0.00778437		2.32561	4.17905	-0.00732541		2.32561	4.23299	-0.00806451
2.33281	4.16925	-0.0277221		2.33281	4.17688	-0.00558496		2.33281	4.17532	0.00555515		2.33281	4.17334	-0.010711		2.33281	4.1796	-0.00991821		2.33281	4.18002	7.7486e-05		2.33281	4.15196	0.00127554		2.33281	4.16819	-0.0227451		2.33281	4.19345	0.010252		2.33281	4.17927	-0.00711083		2.33281	4.23217	-0.00888705
2.34001	4.16779	-0.0291824		2.34001	4.17541	-0.00705123		2.34001	4.17258	0.00281334		2.34001	4.17768	-0.00637174		2.34001	4.18006	-0.00946522		2.34001	4.17933	-0.000607967		2.34001	4.15457	0.00388622		2.34001	4.1686	-0.0223398		2.34001	4.19521	0.0120044		2.34001	4.17991	-0.00647306		2.34001	4.23097	-0.0100851
2.34722	4.16652	-0.030452		2.34722	4.17377	-0.00869036		2.34722	4.16995	0.000178814		2.34722	4.18177	-0.0022769		2.34722	4.18045	-0.00907183		2.34722	4.17826	-0.00168681		2.34722	4.15751	0.00681877		2.34722	4.16926	-0.0216842		2.34722	4.19621	0.0130117		2.34722	4.18084	-0.00553727		2.34722	4.22946	-0.0115931
2.35442	4.16572	-0.0312507		2.35442	4.17257	-0.00989437		2.35442	4.1676	-0.00216961		2.35442	4.18536	0.0013113		2.35442	4.18065	-0.00887513		2.35442	4.17669	-0.00325441		2.35442	4.16033	0.00963807		2.35442	4.17023	-0.0207067		2.35442	4.19641	0.0132084		2.35442	4.1819	-0.00447631		2.35442	4.22781	-0.0132442
2.36162	4.16558	-0.0313878		2.36162	4.17227	-0.0101984		2.36162	4.16566	-0.00410676		2.36162	4.1883	0.00424981		2.36162	4.18048	-0.00904202		2.36162	4.17476	-0.0051856		2.36162	4.16269	0.0120044		2.36162	4.17159	-0.0193536		2.36162	4.19569	0.0124872		2.36162	4.18292	-0.00346303		2.36162	4.2262	-0.0148594
2.36882	4.16622	-0.030756		2.36882	4.17305	-0.00941157		2.36882	4.16423	-0.00553727		2.36882	4.1905	0.00644922		2.36882	4.17979	-0.00972748		2.36882	4.17274	-0.00720024		2.36882	4.16436	0.0136673		2.36882	4.17329	-0.0176489		2.36882	4.19397	0.0107706		2.36882	4.18375	-0.00263453		2.36882	4.22477	-0.016284
2.37602	4.16776	-0.0292122		2.37602	4.17482	-0.00764132		2.37602	4.16332	-0.00644922		2.37602	4.19191	0.00786185		2.37602	4.17854	-0.0109792		2.37602	4.17101	-0.00893474		2.37602	4.16515	0.0144601		2.37602	4.17528	-0.0156581		2.37602	4.19134	0.00814199		2.37602	4.18433	-0.0020504		2.37602	4.22373	-0.0173271
2.38322	4.17027	-0.0267029		2.38322	4.17723	-0.00523329		2.38322	4.16284	-0.00692606		2.38322	4.19253	0.00848174		2.38322	4.17674	-0.0127852		2.38322	4.16986	-0.0100791		2.38322	4.1651	0.0144064		2.38322	4.17752	-0.013423		2.38322	4.1881	0.0048995		2.38322	4.18467	-0.00171065		2.38322	4.22317	-0.0178874
2.39042	4.17359	-0.0233769		2.39042	4.17972	-0.00274777		2.39042	4.16262	-0.00715256		2.39042	4.19239	0.00834465		2.39042	4.17443	-0.0150919		2.39042	4.16951	-0.0104368		2.39042	4.16446	0.0137687		2.39042	4.17995	-0.0109851		2.39042	4.18463	0.00143051		2.39042	4.18477	-0.00160933		2.39042	4.22302	-0.0180304
2.39762	4.17738	-0.019592		2.39762	4.18171	-0.000756979		2.39762	4.16241	-0.00735521		2.39762	4.19156	0.00751019		2.39762	4.1717	-0.0178218		2.39762	4.16996	-0.00997782		2.39762	4.16359	0.0128984		2.39762	4.18246	-0.00848174		2.39762	4.18131	-0.00188947		2.39762	4.18464	-0.00174046		2.39762	4.22298	-0.0180781
2.40482	4.18117	-0.0158012		2.40482	4.18273	0.00026226		2.40482	4.16213	-0.00764131		2.40482	4.19007	0.00602007		2.40482	4.16866	-0.0208616		2.40482	4.17111	-0.00883341		2.40482	4.16276	0.0120699		2.40482	4.18481	-0.00612736		2.40482	4.17841	-0.00479221		2.40482	4.1843	-0.0020802		2.40482	4.22265	-0.0184059
2.41202	4.18466	-0.0123084		2.41202	4.18252	5.96046e-05		2.41202	4.16175	-0.00802279		2.41202	4.18801	0.00396371		2.41202	4.16546	-0.0240624		2.41202	4.17265	-0.00729561		2.41202	4.16204	0.0113487		2.41202	4.18679	-0.00415444		2.41202	4.1761	-0.00710487		2.41202	4.18382	-0.002563		2.41202	4.22177	-0.0192881
2.41922	4.18769	-0.0092864		2.41922	4.1811	-0.00136495		2.41922	4.1614	-0.00836849		2.41922	4.18557	0.00151992		2.41922	4.16229	-0.0272334		2.41922	4.17423	-0.00571609		2.41922	4.16138	0.0106871		2.41922	4.18821	-0.00272989		2.41922	4.17448	-0.00872612		2.41922	4.1833	-0.00308156		2.41922	4.22027	-0.0207841
2.42642	4.19018	-0.00679493		2.42642	4.17872	-0.00374317		2.42642	4.16124	-0.00852942		2.42642	4.18298	-0.00107288		2.42642	4.1594	-0.0301182		2.42642	4.17546	-0.00448227		2.42642	4.16071	0.0100195		2.42642	4.189	-0.00193715		2.42642	4.17357	-0.00963211		2.42642	4.18285	-0.00353456		2.42642	4.21826	-0.0227988
2.43362	4.19201	-0.00496507		2.43362	4.17579	-0.00666976		2.43362	4.16141	-0.00835657		2.43362	4.18053	-0.00352264		2.43362	4.15708	-0.0324428		2.43362	4.17608	-0.00386238		2.43362	4.16006	0.00936985		2.43362	4.18912	-0.00181794		2.43362	4.17322	-0.00998378		2.43362	4.18243	-0.00395179		2.43362	4.21587	-0.0251889
2.44082	4.19306	-0.00391006		2.44082	4.17281	-0.00964999		2.44082	4.16204	-0.00773072		2.44082	4.17843	-0.00562072		2.44082	4.15556	-0.0339627		2.44082	4.17602	-0.00392199		2.44082	4.15943	0.008744		2.44082	4.18854	-0.00239611		2.44082	4.17307	-0.0101328		2.44082	4.18193	-0.00445247		2.44082	4.21332	-0.02774
2.44802	4.19333	-0.00364184		2.44802	4.17027	-0.0121951		2.44802	4.16325	-0.00652075		2.44802	4.17684	-0.0072062		2.44802	4.15501	-0.0345111		2.44802	4.17542	-0.00452399		2.44802	4.15872	0.00803471		2.44802	4.18736	-0.00357628		2.44802	4.17267	-0.0105321		2.44802	4.18124	-0.00514388		2.44802	4.21092	-0.0301361
2.45522	4.19294	-0.00402927		2.45522	4.1685	-0.0139594		2.45522	4.16507	-0.00469685		2.45522	4.17585	-0.0082016		2.45522	4.15546	-0.0340641		2.45522	4.17459	-0.0053525		2.45522	4.15772	0.00702739		2.45522	4.18581	-0.00513196		2.45522	4.17168	-0.0115216		2.45522	4.1803	-0.00607967		2.45522	4.20904	-0.0320196
2.46242	4.19206	-0.00491142		2.46242	4.16768	-0.014782		2.46242	4.16734	-0.00242591		2.46242	4.1754	-0.00864863		2.46242	4.15685	-0.0326753		2.46242	4.17385	-0.00609159		2.46242	4.15632	0.00563264		2.46242	4.18414	-0.00680089		2.46242	4.16999	-0.0132143		2.46242	4.17916	-0.00721812		2.46242	4.20794	-0.0331163
2.46962	4.19077	-0.00619888		2.46962	4.16775	-0.0147104		2.46962	4.16973	-3.5763e-05		2.46962	4.1754	-0.00864863		2.46962	4.15909	-0.0304282		2.46962	4.17345	-0.00649095		2.46962	4.15469	0.00399947		2.46962	4.18255	-0.00838637		2.46962	4.16772	-0.0154853		2.46962	4.17783	-0.00854731		2.46962	4.20768	-0.0333726
2.47682	4.18909	-0.00787973		2.47682	4.1685	-0.0139594		2.47682	4.1719	0.00213385		2.47682	4.17561	-0.00844002		2.47682	4.16204	-0.0274777		2.47682	4.17348	-0.00646114		2.47682	4.1532	0.00251532		2.47682	4.18112	-0.00982285		2.47682	4.16512	-0.0180781		2.47682	4.17628	-0.010097		2.47682	4.20811	-0.0329494
2.48402	4.18706	-0.00991225		2.48402	4.16962	-0.0128448		2.48402	4.17368	0.00391006		2.48402	4.1757	-0.00834465		2.48402	4.16546	-0.0240564		2.48402	4.17388	-0.00606179		2.48402	4.15229	0.00160337		2.48402	4.1798	-0.0111401		2.48402	4.16251	-0.0206947		2.48402	4.17451	-0.0118673		2.48402	4.20901	-0.0320494
2.49122	4.18486	-0.0121117		2.49122	4.1707	-0.01176		2.49122	4.17505	0.00528097		2.49122	4.17545	-0.00860095		2.49122	4.16897	-0.0205517		2.49122	4.17444	-0.00550747		2.49122	4.15223	0.00154376		2.49122	4.1786	-0.0123441		2.49122	4.16019	-0.0230134		2.49122	4.17255	-0.0138283		2.49122	4.21022	-0.0308335
2.49842	4.18273	-0.0142395		2.49842	4.1714	-0.0110626		2.49842	4.17609	0.00632405		2.49842	4.17472	-0.00933409		2.49842	4.17212	-0.0173986		2.49842	4.17485	-0.00509024		2.49842	4.15318	0.00249147		2.49842	4.17751	-0.0134289		2.49842	4.15845	-0.0247538		2.49842	4.17059	-0.0157893		2.49842	4.21161	-0.0294447
2.50562	4.18091	-0.0160635		2.50562	4.17141	-0.0110507		2.50562	4.1769	0.00713468		2.50562	4.17352	-0.0105321		2.50562	4.1746	-0.014919		2.50562	4.17479	-0.0051558		2.50562	4.15516	0.00447035		2.50562	4.17658	-0.0143588		2.50562	4.15754	-0.0256658		2.50562	4.16881	-0.0175655		2.50562	4.21304	-0.0280201
2.51282	4.17956	-0.0174105		2.51282	4.17063	-0.0118375		2.51282	4.17754	0.00777245		2.51282	4.17194	-0.0121057		2.51282	4.17627	-0.0132501		2.51282	4.174	-0.00594258		2.51282	4.15812	0.00742674		2.51282	4.17582	-0.0151217		2.51282	4.15756	-0.0256479		2.51282	4.16738	-0.019002		2.51282	4.21434	-0.0267148
2.52002	4.17889	-0.0180781		2.52002	4.16911	-0.0133574		2.52002	4.1781	0.00833273		2.52002	4.17006	-0.0139892		2.52002	4.17714	-0.0123799		2.52002	4.17243	-0.00751019		2.52002	4.16176	0.0110745		2.52002	4.1752	-0.0157356		2.52002	4.1584	-0.0248015		2.52002	4.16632	-0.020057		2.52002	4.21546	-0.0256002
2.52722	4.1791	-0.0178695		2.52722	4.16708	-0.015384		2.52722	4.17867	0.00889897		2.52722	4.1679	-0.0161469		2.52722	4.17718	-0.0123382		2.52722	4.17029	-0.00964999		2.52722	4.16561	0.014919		2.52722	4.17475	-0.0161946		2.52722	4.15981	-0.0233948		2.52722	4.16563	-0.0207484		2.52722	4.21649	-0.024569
2.53442	4.1803	-0.0166714		2.53442	4.16492	-0.0175416		2.53442	4.17926	0.00949502		2.53442	4.1656	-0.0184536		2.53442	4.17638	-0.0131428		2.53442	4.168	-0.0119388		2.53442	4.16899	0.0183046		2.53442	4.17451	-0.016433		2.53442	4.16148	-0.0217259		2.53442	4.16523	-0.0211477		2.53442	4.21762	-0.0234365
2.54162	4.18242	-0.0145555		2.54162	4.16306	-0.0194013		2.54162	4.17979	0.0100255		2.54162	4.16334	-0.0207126		2.54162	4.17476	-0.0147581		2.54162	4.16611	-0.0138283		2.54162	4.17132	0.0206292		2.54162	4.17459	-0.0163496		2.54162	4.16319	-0.0200093		2.54162	4.165	-0.0213802		2.54162	4.21902	-0.0220358
2.54882	4.18517	-0.0118017		2.54882	4.16193	-0.0205338		2.54882	4.18001	0.010246		2.54882	4.16141	-0.0226378		2.54882	4.17261	-0.0169158		2.54882	4.16512	-0.0148237		2.54882	4.17221	0.0215173		2.54882	4.17513	-0.0158072		2.54882	4.16486	-0.0183403		2.54882	4.16476	-0.0216246		2.54882	4.2208	-0.0202537
2.55602	4.18815	-0.00882149		2.55602	4.16185	-0.0206172		2.55602	4.17968	0.00991225		2.55602	4.16012	-0.0239313		2.55602	4.17033	-0.0191927		2.55602	4.16529	-0.0146508		2.55602	4.17161	0.0209212		2.55602	4.17613	-0.0148058		2.55602	4.16645	-0.0167489		2.55602	4.1643	-0.0220835		2.55602	4.22297	-0.018084
2.56322	4.19098	-0.00599027		2.56322	4.16296	-0.0195026		2.56322	4.17864	0.00887513		2.56322	4.15962	-0.0244319		2.56322	4.16829	-0.0212312		2.56322	4.1667	-0.0132382		2.56322	4.16985	0.0191569		2.56322	4.17755	-0.0133872		2.56322	4.16797	-0.015229		2.56322	4.16355	-0.0228345		2.56322	4.22549	-0.0155687
2.57042	4.19328	-0.00369549		2.57042	4.16529	-0.0171781		2.57042	4.17688	0.00711679		2.57042	4.15999	-0.0240624		2.57042	4.16666	-0.0228643		2.57042	4.16918	-0.0107586		2.57042	4.16743	0.016737		2.57042	4.17925	-0.0116885		2.57042	4.16948	-0.013721		2.57042	4.16258	-0.0238001		2.57042	4.2282	-0.0128508
2.57762	4.19463	-0.00234246		2.57762	4.16869	-0.0137746		2.57762	4.17458	0.00481009		2.57762	4.16122	-0.0228286		2.57762	4.16546	-0.0240564		2.57762	4.17241	-0.00753403		2.57762	4.16496	0.0142694		2.57762	4.18113	-0.00980496		2.57762	4.17105	-0.0121534		2.57762	4.16167	-0.0247061		2.57762	4.23088	-0.0101745
2.58482	4.19473	-0.00224113		2.58482	4.17291	-0.00955462		2.58482	4.17195	0.00218153		2.58482	4.16327	-0.0207782		2.58482	4.16472	-0.0248015		2.58482	4.17594	-0.00400543		2.58482	4.16299	0.0123024		2.58482	4.18318	-0.00776052		2.58482	4.17274	-0.0104606		2.58482	4.16111	-0.0252664		2.58482	4.23319	-0.00786781
2.59202	4.19345	-0.00351667		2.59202	4.17762	-0.00484586		2.59202	4.16927	-0.000500679		2.59202	4.16598	-0.0180662		2.59202	4.16448	-0.0250399		2.59202	4.17925	-0.000691414		2.59202	4.16195	0.0112593		2.59202	4.18536	-0.00557899		2.59202	4.17455	-0.00864863		2.59202	4.16117	-0.0252128		2.59202	4.23484	-0.00621676
2.59922	4.19097	-0.00600219		2.59922	4.18246	0		2.59922	4.16679	-0.00298023		2.59922	4.16901	-0.0150383		2.59922	4.16476	-0.0247598		2.59922	4.18186	0.00191927		2.59922	4.16207	0.0113785		2.59922	4.18758	-0.00335574		2.59922	4.17635	-0.00684857		2.59922	4.16199	-0.0243902		2.59922	4.23564	-0.0054121
2.60642	4.18764	-0.00933409		2.60642	4.18714	0.004673		2.60642	4.16475	-0.00501871		2.60642	4.17187	-0.0121832		2.60642	4.16543	-0.0240922		2.60642	4.18354	0.00360012		2.60642	4.16338	0.0126958		2.60642	4.18967	-0.00126958		2.60642	4.17796	-0.00524521		2.60642	4.16363	-0.0227451		2.60642	4.23558	-0.00547767
2.61362	4.18389	-0.0130832		2.61362	4.19145	0.00898242		2.61362	4.16332	-0.00644922		2.61362	4.17411	-0.00994205		2.61362	4.16623	-0.0232935		2.61362	4.18437	0.00442863		2.61362	4.16566	0.0149667		2.61362	4.19149	0.000554323		2.61362	4.17914	-0.00405908		2.61362	4.16598	-0.0203967		2.61362	4.23471	-0.00634193
2.62082	4.18012	-0.0168562		2.62082	4.19523	0.0127614		2.62082	4.16255	-0.00721812		2.62082	4.17543	-0.00861883		2.62082	4.16697	-0.0225544		2.62082	4.18465	0.00470281		2.62082	4.16837	0.0176787		2.62082	4.19298	0.00203848		2.62082	4.17976	-0.00344515		2.62082	4.16874	-0.017643		2.62082	4.23318	-0.00787973
2.62802	4.17663	-0.0203431		2.62802	4.19829	0.015825		2.62802	4.16237	-0.00739694		2.62802	4.17582	-0.00822544		2.62802	4.16762	-0.0219047		2.62802	4.18473	0.00479221		2.62802	4.17098	0.0202894		2.62802	4.19408	0.00314116		2.62802	4.17968	-0.00352263		2.62802	4.17144	-0.0149369		2.62802	4.23107	-0.00998378
2.63522	4.17371	-0.0232637		2.63522	4.20043	0.0179648		2.63522	4.16259	-0.00718236		2.63522	4.17541	-0.00863671		2.63522	4.16827	-0.021255		2.63522	4.18491	0.00496507		2.63522	4.17307	0.0223815		2.63522	4.19472	0.00378489		2.63522	4.1789	-0.00430346		2.63522	4.17362	-0.0127614		2.63522	4.22851	-0.0125408
2.64242	4.17152	-0.0254512		2.64242	4.20151	0.0190437		2.64242	4.16299	-0.00678301		2.64242	4.17438	-0.00966787		2.64242	4.16901	-0.02051		2.64242	4.18541	0.00547171		2.64242	4.17443	0.0237405		2.64242	4.19481	0.0038743		2.64242	4.17749	-0.00571012		2.64242	4.17499	-0.0113904		2.64242	4.22556	-0.0154972
2.64962	4.17011	-0.0268579		2.64962	4.20148	0.0190139		2.64962	4.16342	-0.0063479		2.64962	4.17294	-0.0111103		2.64962	4.1699	-0.0196218		2.64962	4.18643	0.00648499		2.64962	4.17507	0.0243843		2.64962	4.19428	0.00334382		2.64962	4.17562	-0.00758767		2.64962	4.17556	-0.0108182		2.64962	4.22225	-0.0188053
2.65682	4.16939	-0.0275791		2.65682	4.20039	0.0179291		2.65682	4.16382	-0.00594854		2.65682	4.17124	-0.012809		2.65682	4.17093	-0.0185907		2.65682	4.18798	0.00804067		2.65682	4.17503	0.0243425		2.65682	4.19325	0.00231266		2.65682	4.17339	-0.00981092		2.65682	4.17551	-0.0108659		2.65682	4.21866	-0.0223935
2.66402	4.16926	-0.0277102		2.66402	4.19837	0.0159025		2.66402	4.16419	-0.005579		2.66402	4.16936	-0.0146866		2.66402	4.17208	-0.0174403		2.66402	4.1899	0.00995994		2.66402	4.17441	0.0237167		2.66402	4.19194	0.000995398		2.66402	4.17094	-0.0122666		2.66402	4.17513	-0.0112474		2.66402	4.21489	-0.0261664
2.67122	4.1696	-0.0273764		2.67122	4.19555	0.0130832		2.67122	4.16453	-0.00523329		2.67122	4.16735	-0.0167012		2.67122	4.17332	-0.0162005		2.67122	4.19176	0.0118196		2.67122	4.17337	0.0226855		2.67122	4.19056	-0.00038147		2.67122	4.16837	-0.0148296		2.67122	4.17465	-0.0117302		2.67122	4.21109	-0.0299692
2.67842	4.17032	-0.0266492		2.67842	4.19214	0.00967979		2.67842	4.16491	-0.00485778		2.67842	4.16519	-0.0188589		2.67842	4.17465	-0.0148714		2.67842	4.19317	0.0132263		2.67842	4.17219	0.0214994		2.67842	4.18924	-0.00169873		2.67842	4.16589	-0.0173151		2.67842	4.17421	-0.0121653		2.67842	4.20747	-0.0335813
2.68562	4.17144	-0.0255346		2.68562	4.18847	0.00600815		2.68562	4.16535	-0.00442266		2.68562	4.16293	-0.0211179		2.68562	4.17605	-0.0134706		2.68562	4.19389	0.0139475		2.68562	4.17112	0.0204265		2.68562	4.18804	-0.00289679		2.68562	4.16366	-0.0195444		2.68562	4.17391	-0.0124693		2.68562	4.20431	-0.0367403
2.69282	4.17297	-0.0240028		2.69282	4.18491	0.00244379		2.69282	4.16589	-0.00388026		2.69282	4.16065	-0.0234008		2.69282	4.17749	-0.0120282		2.69282	4.19391	0.0139654		2.69282	4.17033	0.0196397		2.69282	4.18705	-0.00389218		2.69282	4.16177	-0.0214338		2.69282	4.17376	-0.0126183		2.69282	4.20187	-0.0391841
2.70002	4.17491	-0.0220656		2.70002	4.18184	-0.000625849		2.70002	4.16651	-0.00325441		2.70002	4.15851	-0.0255346		2.70002	4.17899	-0.0105262		2.70002	4.19333	0.0133872		2.70002	4.16988	0.0191927		2.70002	4.18634	-0.00460148		2.70002	4.1602	-0.0230074		2.70002	4.17364	-0.0127375		2.70002	4.2004	-0.0406563
2.70722	4.17714	-0.0198305		2.70722	4.17957	-0.00289679		2.70722	4.16716	-0.00261068		2.70722	4.15675	-0.0272989		2.70722	4.18055	-0.0089705		2.70722	4.19231	0.012368		2.70722	4.16978	0.0190914		2.70722	4.18585	-0.00509024		2.70722	4.15891	-0.0242949		2.70722	4.17333	-0.0130475		2.70722	4.20002	-0.0410378
2.71442	4.17941	-0.0175655		2.71442	4.17822	-0.00424385		2.71442	4.16772	-0.00204444		2.71442	4.15569	-0.0283599		2.71442	4.18214	-0.00737906		2.71442	4.19109	0.0111461		2.71442	4.17004	0.0193536		2.71442	4.18537	-0.00556707		2.71442	4.15795	-0.0252485		2.71442	4.17266	-0.013715		2.71442	4.20067	-0.0403881
2.72162	4.1814	-0.0155687		2.72162	4.17775	-0.00471473		2.72162	4.16815	-0.00162125		2.72162	4.15558	-0.0284731		2.72162	4.18367	-0.00584722		2.72162	4.19	0.0100553		2.72162	4.17073	0.020045		2.72162	4.18459	-0.00635386		2.72162	4.1575	-0.0257015		2.72162	4.17165	-0.0147343		2.72162	4.20211	-0.0389457
2.72882	4.18285	-0.0141263		2.72882	4.17793	-0.00452995		2.72882	4.16843	-0.00133514		2.72882	4.15655	-0.0275016		2.72882	4.185	-0.00452399		2.72882	4.18941	0.00946522		2.72882	4.17184	0.0211537		2.72882	4.18326	-0.00767708		2.72882	4.15764	-0.0255644		2.72882	4.17057	-0.0158072		2.72882	4.20398	-0.03708
2.73602	4.1835	-0.0134766		2.73602	4.17857	-0.00389814		2.73602	4.16867	-0.00109673		2.73602	4.15847	-0.0255764		2.73602	4.18592	-0.00360012		2.73602	4.18949	0.0095427		2.73602	4.17328	0.0225961		2.73602	4.18132	-0.00962019		2.73602	4.15838	-0.0248194		2.73602	4.16988	-0.0164986		2.73602	4.20594	-0.0351131
2.74322	4.18323	-0.0137448		2.74322	4.17941	-0.00305772		2.74322	4.16888	-0.000888109		2.74322	4.16098	-0.023067		2.74322	4.18624	-0.00328422		2.74322	4.19017	0.0102282		2.74322	4.17486	0.0241756		2.74322	4.17883	-0.0121117		2.74322	4.15965	-0.0235498		2.74322	4.16992	-0.0164568		2.74322	4.20779	-0.0332654
2.75042	4.18195	-0.0150204		2.75042	4.18029	-0.00216961		2.75042	4.16908	-0.000685453		2.75042	4.16363	-0.0204206		2.75042	4.18583	-0.00368953		2.75042	4.19123	0.0112832		2.75042	4.17632	0.025636		2.75042	4.1759	-0.0150442		2.75042	4.16139	-0.0218093		2.75042	4.17091	-0.0154734		2.75042	4.20944	-0.0316143
2.75762	4.17969	-0.0172794		2.75762	4.18102	-0.00144243		2.75762	4.16927	-0.000494719		2.75762	4.166	-0.0180483		2.75762	4.18464	-0.00488162		2.75762	4.19238	0.0124335		2.75762	4.17742	0.0267327		2.75762	4.17271	-0.0182331		2.75762	4.16361	-0.019592		2.75762	4.17286	-0.0135243		2.75762	4.21091	-0.0301421
2.76482	4.17665	-0.0203252		2.76482	4.18148	-0.000983477		2.76482	4.16949	-0.000280142		2.76482	4.16785	-0.0161946		2.76482	4.18268	-0.00684261		2.76482	4.19337	0.0134289		2.76482	4.1779	0.0272155		2.76482	4.16954	-0.021404		2.76482	4.16629	-0.0169158		2.76482	4.17571	-0.0106692		2.76482	4.21225	-0.0288069
2.77202	4.17313	-0.0238419		2.77202	4.18169	-0.0007689		2.77202	4.16978	1.1921e-05		2.77202	4.16911	-0.0149369		2.77202	4.18015	-0.00936985		2.77202	4.1939	0.0139594		2.77202	4.17757	0.0268817		2.77202	4.1667	-0.0242412		2.77202	4.16931	-0.0138938		2.77202	4.17934	-0.00703931		2.77202	4.21356	-0.0274956
2.77922	4.16947	-0.0275016		2.77922	4.18185	-0.000613928		2.77922	4.17016	0.000393391		2.77922	4.16987	-0.0141799		2.77922	4.1774	-0.0121176		2.77922	4.19366	0.013715		2.77922	4.17624	0.0255466		2.77922	4.16452	-0.0264168		2.77922	4.17248	-0.0107229		2.77922	4.18347	-0.00291467		2.77922	4.21494	-0.0261128
2.78642	4.16594	-0.0310361		2.78642	4.18218	-0.000280142		2.78642	4.17064	0.000870228		2.78642	4.17033	-0.013715		2.78642	4.17487	-0.0146508		2.78642	4.1924	0.0124574		2.78642	4.1739	0.023216		2.78642	4.16322	-0.0277162		2.78642	4.17556	-0.00764132		2.78642	4.18764	0.00126362		2.78642	4.21649	-0.024569
2.79362	4.16276	-0.0342131		2.79362	4.18281	0.000345707		2.79362	4.17124	0.00147223		2.79362	4.17079	-0.013262		2.79362	4.17289	-0.0166297		2.79362	4.19011	0.0101626		2.79362	4.17078	0.0200927		2.79362	4.16293	-0.0280142		2.79362	4.17842	-0.00478625		2.79362	4.19145	0.00506639		2.79362	4.21821	-0.0228465
2.80082	4.1601	-0.0368714		2.80082	4.18366	0.00119209		2.80082	4.172	0.00223517		2.80082	4.17149	-0.0125587		2.80082	4.17163	-0.0178933		2.80082	4.18694	0.00699759		2.80082	4.16731	0.0166237		2.80082	4.16359	-0.0273526		2.80082	4.18094	-0.00226498		2.80082	4.19457	0.00818968		2.80082	4.22002	-0.0210345
2.80802	4.15808	-0.038892		2.80802	4.18453	0.00206828		2.80802	4.17295	0.00318289		2.80802	4.17258	-0.0114679		2.80802	4.17104	-0.0184834		2.80802	4.1832	0.00326037		2.80802	4.16402	0.0133336		2.80802	4.165	-0.0259399		2.80802	4.18309	-0.000113249		2.80802	4.19694	0.010556		2.80802	4.22176	-0.0193
2.81522	4.15677	-0.0401974		2.81522	4.18519	0.00272989		2.81522	4.17402	0.00424981		2.81522	4.17398	-0.0100672		2.81522	4.17092	-0.0186026		2.81522	4.17919	-0.000756979		2.81522	4.16138	0.0106871		2.81522	4.16689	-0.0240505		2.81522	4.18478	0.00157356		2.81522	4.19855	0.0121713		2.81522	4.22329	-0.0177622
2.82242	4.15619	-0.0407815		2.82242	4.18549	0.00302196		2.82242	4.17506	0.00529289		2.82242	4.1754	-0.00864863		2.82242	4.17103	-0.0184953		2.82242	4.1752	-0.00473857		2.82242	4.15968	0.00898838		2.82242	4.169	-0.0219405		2.82242	4.18588	0.00267625		2.82242	4.19939	0.0130057		2.82242	4.22462	-0.016439
2.82962	4.15637	-0.0406027		2.82962	4.18529	0.00282526		2.82962	4.17594	0.00616908		2.82962	4.17641	-0.00763536		2.82962	4.17105	-0.0184715		2.82962	4.17166	-0.00828505		2.82962	4.15902	0.00832677		2.82962	4.17113	-0.0198066		2.82962	4.18621	0.00300407		2.82962	4.19936	0.0129759		2.82962	4.22581	-0.0152409
2.83682	4.15733	-0.039643		2.83682	4.18455	0.00208616		2.83682	4.17653	0.00676513		2.83682	4.17663	-0.00741482		2.83682	4.17072	-0.0188053		2.83682	4.1689	-0.0110388		2.83682	4.15933	0.00863671		2.83682	4.17316	-0.0177801		2.83682	4.18556	0.00235438		2.83682	4.19847	0.0120878		2.83682	4.22701	-0.0140488
2.84402	4.15908	-0.0378907		2.84402	4.1833	0.000840425		2.84402	4.17681	0.00703931		2.84402	4.17587	-0.00818372		2.84402	4.16987	-0.0196517		2.84402	4.16715	-0.0127912		2.84402	4.16042	0.00972748		2.84402	4.17488	-0.0160635		2.84402	4.18379	0.000584126		2.84402	4.19687	0.0104904		2.84402	4.22829	-0.0127673
2.85122	4.16149	-0.0354767		2.85122	4.18168	-0.000786781		2.85122	4.17674	0.00697374		2.85122	4.17414	-0.00991225		2.85122	4.16855	-0.0209689		2.85122	4.16638	-0.013566		2.85122	4.162	0.011307		2.85122	4.17607	-0.0148714		2.85122	4.18087	-0.0023365		2.85122	4.19484	0.0084579		2.85122	4.22962	-0.0114381
2.85842	4.16433	-0.0326395		2.85842	4.17988	-0.00258088		2.85842	4.1764	0.00662804		2.85842	4.1717	-0.0123501		2.85842	4.16703	-0.0224888		2.85842	4.16636	-0.0135779		2.85842	4.16374	0.0130534		2.85842	4.17665	-0.0142872		2.85842	4.17691	-0.00628829		2.85842	4.19258	0.00620484		2.85842	4.23089	-0.0101626
2.86562	4.16728	-0.029695		2.86562	4.1782	-0.00426769		2.86562	4.17589	0.0061214		2.86562	4.16895	-0.0151038		2.86562	4.16572	-0.0238001		2.86562	4.16682	-0.0131249		2.86562	4.16536	0.0146687		2.86562	4.17668	-0.0142574		2.86562	4.17215	-0.0110567		2.86562	4.19016	0.00377893		2.86562	4.23194	-0.00911951
2.87282	4.16998	-0.026989		2.87282	4.17685	-0.00561476		2.87282	4.17537	0.00560284		2.87282	4.16629	-0.0177562		2.87282	4.16505	-0.0244677		2.87282	4.1674	-0.0125468		2.87282	4.16662	0.0159264		2.87282	4.17629	-0.0146508		2.87282	4.16693	-0.0162721		2.87282	4.18752	0.00113845		2.87282	4.23256	-0.00849366
2.88002	4.17212	-0.0248551		2.88002	4.17603	-0.00643134		2.88002	4.17491	0.00514388		2.88002	4.16419	-0.0198603		2.88002	4.16535	-0.0241756		2.88002	4.16777	-0.0121713		2.88002	4.16747	0.0167787		2.88002	4.1756	-0.0153363		2.88002	4.16178	-0.0214279		2.88002	4.18462	-0.00175834		2.88002	4.23262	-0.00844002
2.88722	4.17339	-0.0235856		2.88722	4.1759	-0.00656247		2.88722	4.17451	0.00474453		2.88722	4.16299	-0.0210643		2.88722	4.16669	-0.0228345		2.88722	4.16771	-0.0122309		2.88722	4.16799	0.0172973		2.88722	4.17472	-0.0162184		2.88722	4.15723	-0.0259757		2.88722	4.18148	-0.0048995		2.88722	4.23196	-0.00909567
2.89442	4.17359	-0.0233769		2.89442	4.17655	-0.00591874		2.89442	4.17408	0.00430942		2.89442	4.16283	-0.0212193		2.89442	4.16898	-0.0205457		2.89442	4.16715	-0.0127971		2.89442	4.16836	0.0176728		2.89442	4.1738	-0.0171363		2.89442	4.15382	-0.0293791		2.89442	4.17812	-0.0082612		2.89442	4.23057	-0.0104845
2.90162	4.17274	-0.0242293		2.90162	4.17798	-0.00448823		2.90162	4.17351	0.00374317		2.90162	4.16365	-0.0204027		2.90162	4.17197	-0.0175476		2.90162	4.16622	-0.013721		2.90162	4.16876	0.0180721		2.90162	4.17307	-0.0178695		2.90162	4.15187	-0.0313282		2.90162	4.17457	-0.0118136		2.90162	4.22856	-0.0124931
2.90882	4.17108	-0.0258923		2.90882	4.18013	-0.00233054		2.90882	4.17276	0.00299215		2.90882	4.16518	-0.0188708		2.90882	4.17542	-0.0141025		2.90882	4.16514	-0.0148058		2.90882	4.16924	0.0185549		2.90882	4.17274	-0.0181973		2.90882	4.15144	-0.0317633		2.90882	4.1709	-0.0154793		2.90882	4.2262	-0.0148594
2.91602	4.16903	-0.0279367		2.91602	4.18289	0.000423193		2.91602	4.17176	0.0019908		2.91602	4.16713	-0.0169158		2.91602	4.17902	-0.0105023		2.91602	4.1641	-0.0158429		2.91602	4.16982	0.0191331		2.91602	4.17292	-0.0180185		2.91602	4.15234	-0.0308633		2.91602	4.16732	-0.0190556		2.91602	4.22387	-0.01719
2.92322	4.16711	-0.0298619		2.92322	4.18603	0.00356436		2.92322	4.17048	0.000709295		2.92322	4.16926	-0.0147939		2.92322	4.18248	-0.00703931		2.92322	4.16328	-0.0166595		2.92322	4.17047	0.0197768		2.92322	4.17352	-0.0174165		2.92322	4.15419	-0.0290096		2.92322	4.16422	-0.022155		2.92322	4.22201	-0.0190496
2.93042	4.16574	-0.0312328		2.93042	4.18929	0.00683069		2.93042	4.16899	-0.00077486		2.93042	4.17129	-0.0127614		2.93042	4.18552	-0.00400543		2.93042	4.16282	-0.0171185		2.93042	4.17112	0.0204325		2.93042	4.17441	-0.0165343		2.93042	4.15657	-0.0266373		2.93042	4.16208	-0.0243008		2.93042	4.221	-0.020051
2.93762	4.16515	-0.031817		2.93762	4.1923	0.00984073		2.93762	4.16741	-0.00235438		2.93762	4.17302	-0.0110328		2.93762	4.1879	-0.00162125		2.93762	4.16284	-0.0171065		2.93762	4.1718	0.021112		2.93762	4.17539	-0.0155509		2.93762	4.15901	-0.0241935		2.93762	4.16127	-0.0251055		2.93762	4.22106	-0.0199974
2.94482	4.16543	-0.0315428		2.94482	4.19461	0.0121415		2.94482	4.16591	-0.00385642		2.94482	4.17429	-0.00976324		2.94482	4.18958	5.96046e-05		2.94482	4.16337	-0.0165761		2.94482	4.17249	0.0218034		2.94482	4.17625	-0.0146925		2.94482	4.1611	-0.0221014		2.94482	4.16197	-0.0244081		2.94482	4.22222	-0.0188351
2.95202	4.16651	-0.030458		2.95202	4.19567	0.0132084		2.95202	4.16465	-0.00512004		2.95202	4.17514	-0.00891089		2.95202	4.19068	0.00116229		2.95202	4.16438	-0.0155628		2.95202	4.17322	0.0225306		2.95202	4.17674	-0.0142038		2.95202	4.16259	-0.0206172		2.95202	4.16403	-0.0223458		2.95202	4.22437	-0.0166833
2.95922	4.16827	-0.0287056		2.95922	4.19517	0.0127017		2.95922	4.16373	-0.00603795		2.95922	4.17573	-0.00831485		2.95922	4.19136	0.00184178		2.95922	4.16588	-0.0140607		2.95922	4.17401	0.0233173		2.95922	4.17668	-0.0142634		2.95922	4.16336	-0.0198424		2.95922	4.16711	-0.0192702		2.95922	4.22726	-0.0137925
2.96642	4.17047	-0.0265002		2.96642	4.193	0.0105381		2.96642	4.16327	-0.00650287		2.96642	4.17624	-0.00781417		2.96642	4.19174	0.00222325		2.96642	4.16794	-0.0120044		2.96642	4.17489	0.0241995		2.96642	4.17604	-0.0149012		2.96642	4.1635	-0.0197053		2.96642	4.17074	-0.0156403		2.96642	4.23061	-0.0104427
2.97362	4.17286	-0.024116		2.97362	4.18935	0.00688434		2.97362	4.16332	-0.00644922		2.97362	4.17671	-0.00734329		2.97362	4.19188	0.00236034		2.97362	4.17067	-0.00926852		2.97362	4.17588	0.0251949		2.97362	4.17496	-0.01598		2.97362	4.16313	-0.0200748		2.97362	4.17448	-0.011903		2.97362	4.23402	-0.00703335
2.98082	4.17516	-0.0218093		2.98082	4.18457	0.00210404		2.98082	4.16393	-0.00583529		2.98082	4.17709	-0.00695586		2.98082	4.19185	0.00233054		2.98082	4.17413	-0.00581145		2.98082	4.17691	0.026226		2.98082	4.1737	-0.0172436		2.98082	4.16249	-0.0207126		2.98082	4.17788	-0.00849962		2.98082	4.23709	-0.00396967
2.98802	4.17726	-0.0197113		2.98802	4.17911	-0.00334978		2.98802	4.16514	-0.00463128		2.98802	4.1773	-0.00674725		2.98802	4.19176	0.00224113		2.98802	4.17818	-0.0017643		2.98802	4.17778	0.0270963		2.98802	4.17251	-0.0184298		2.98802	4.16185	-0.0213563		2.98802	4.18056	-0.00581741		2.98802	4.2394	-0.00165105
2.99522	4.1792	-0.0177741		2.99522	4.17356	-0.00889897		2.99522	4.16691	-0.00285506		2.99522	4.17724	-0.00681281		2.99522	4.19176	0.00224113		2.99522	4.18252	0.00257492		2.99522	4.17823	0.0275433		2.99522	4.17169	-0.0192463		2.99522	4.16149	-0.021714		2.99522	4.1823	-0.00408292		2.99522	4.24073	-0.000327826
3.00242	4.18107	-0.0159025		3.00242	4.16862	-0.0138402		3.00242	4.16922	-0.000548363		3.00242	4.17681	-0.00724196		3.00242	4.19192	0.00239611		3.00242	4.18668	0.00674129		3.00242	4.17798	0.027293		3.00242	4.1715	-0.0194371		3.00242	4.16169	-0.0215173		3.00242	4.18305	-0.00332594		3.00242	4.24101	-4.76837e-05
3.00962	4.18294	-0.0140309		3.00962	4.165	-0.0174642		3.00962	4.17198	0.00221133		3.00962	4.17588	-0.0081718		3.00962	4.19214	0.00261664		3.00962	4.19016	0.0102222		3.00962	4.17693	0.0262439		3.00962	4.17212	-0.0188172		3.00962	4.16263	-0.0205755		3.00962	4.18298	-0.00339746		3.00962	4.24043	-0.000625849
3.01682	4.18473	-0.0122428		3.01682	4.16326	-0.0192046		3.01682	4.17512	0.0053525		3.01682	4.17433	-0.00972152		3.01682	4.19227	0.00274777		3.01682	4.19248	0.0125349		3.01682	4.17511	0.02442		3.01682	4.17354	-0.0173986		3.01682	4.16434	-0.0188589		3.01682	4.18229	-0.00408888		3.01682	4.2393	-0.00175834
3.02402	4.18618	-0.0107944		3.02402	4.16363	-0.0188351		3.02402	4.17849	0.00872612		3.02402	4.17211	-0.0119388		3.02402	4.19218	0.00265837		3.02402	4.19329	0.0133514		3.02402	4.17269	0.0220001		3.02402	4.17554	-0.0153959		3.02402	4.16677	-0.016433		3.02402	4.18115	-0.00522733		3.02402	4.23794	-0.00311732
3.03122	4.18705	-0.00992417		3.03122	4.16603	-0.016433		3.03122	4.18184	0.0120759		3.03122	4.16938	-0.0146687		3.03122	4.19187	0.00234842		3.03122	4.19248	0.0125408		3.03122	4.16991	0.0192165		3.03122	4.17781	-0.0131309		3.03122	4.16976	-0.0134408		3.03122	4.17967	-0.00670552		3.03122	4.23667	-0.00438094
3.03842	4.18717	-0.009799		3.03842	4.17006	-0.0124037		3.03842	4.18483	0.0150621		3.03842	4.1665	-0.0175476		3.03842	4.19144	0.00191927		3.03842	4.19015	0.0102103		3.03842	4.16704	0.0163496		3.03842	4.18004	-0.0108957		3.03842	4.17318	-0.0100195		3.03842	4.17792	-0.0084579		3.03842	4.23579	-0.00526905
3.04562	4.18649	-0.0104785		3.04562	4.17516	-0.00730753		3.04562	4.18706	0.0172913		3.04562	4.16391	-0.0201344		3.04562	4.19101	0.00148416		3.04562	4.18662	0.00667572		3.04562	4.16438	0.0136912		3.04562	4.18201	-0.00892878		3.04562	4.17688	-0.00632405		3.04562	4.17597	-0.010407		3.04562	4.23543	-0.00562072
3.05282	4.18504	-0.0119269		3.05282	4.18065	-0.00181198		3.05282	4.18821	0.0184417		3.05282	4.16206	-0.0219882		3.05282	4.19062	0.00110269		3.05282	4.18234	0.00240207		3.05282	4.16219	0.0114977		3.05282	4.18354	-0.0074029		3.05282	4.18063	-0.00256896		3.05282	4.1739	-0.0124812		3.05282	4.23559	-0.00546575
3.06002	4.18293	-0.0140429		3.06002	4.18584	0.00337362		3.06002	4.18809	0.0183225		3.06002	4.1612	-0.0228524		3.06002	4.19039	0.000870228		3.06002	4.1779	-0.00203848		3.06002	4.16055	0.00985861		3.06002	4.18453	-0.00641346		3.06002	4.1842	0.00100136		3.06002	4.17174	-0.0146449		3.06002	4.23599	-0.00506639
3.06722	4.1804	-0.0165761		3.06722	4.19008	0.00761151		3.06722	4.18656	0.0167906		3.06722	4.16143	-0.02262		3.06722	4.19044	0.000917912		3.06722	4.17383	-0.00610948		3.06722	4.1594	0.00870824		3.06722	4.185	-0.00593662		3.06722	4.18735	0.00414848		3.06722	4.16957	-0.0168085		3.06722	4.23621	-0.00484586
3.07442	4.17789	-0.0190794		3.07442	4.19292	0.0104606		3.07442	4.18358	0.0138164		3.07442	4.16268	-0.0213683		3.07442	4.19093	0.00140667		3.07442	4.17051	-0.00942945		3.07442	4.15851	0.00782609		3.07442	4.18509	-0.00584722		3.07442	4.18988	0.00667572		3.07442	4.16753	-0.018847		3.07442	4.2359	-0.0051558
3.08162	4.17598	-0.0209868		3.08162	4.19413	0.0116706		3.08162	4.1793	0.00953674		3.08162	4.16474	-0.0193059		3.08162	4.19191	0.00239015		3.08162	4.16812	-0.0118196		3.08162	4.15769	0.00699759		3.08162	4.18492	-0.00602007		3.08162	4.19179	0.00858307		3.08162	4.16582	-0.0205636		3.08162	4.23489	-0.00616908
3.08882	4.17514	-0.0218272		3.08882	4.19374	0.0112772		3.08882	4.17411	0.00434518		3.08882	4.16729	-0.0167608		3.08882	4.19327	0.00374913		3.08882	4.1666	-0.0133395		3.08882	4.15677	0.00607967		3.08882	4.1845	-0.00644326		3.08882	4.19314	0.00993609		3.08882	4.16462	-0.0217617		3.08882	4.23326	-0.00779033
3.09602	4.17554	-0.0214279		3.09602	4.19198	0.00951886		3.09602	4.16866	-0.00110865		3.09602	4.16988	-0.014174		3.09602	4.19472	0.00519753		3.09602	4.1658	-0.0141382		3.09602	4.15571	0.00502467		3.09602	4.18376	-0.00718236		3.09602	4.19399	0.0107884		3.09602	4.16409	-0.0222862		3.09602	4.23127	-0.00978112
3.10322	4.177	-0.0199735		3.10322	4.18924	0.00677705		3.10322	4.16375	-0.00602007		3.10322	4.1721	-0.0119448		3.10322	4.19595	0.00643134		3.10322	4.16557	-0.0143707		3.10322	4.15453	0.0038445		3.10322	4.1826	-0.00834465		3.10322	4.19431	0.0111043		3.10322	4.16428	-0.0221014		3.10322	4.22925	-0.0118017
3.11042	4.17916	-0.0178099		3.11042	4.18592	0.00345707		3.11042	4.16011	-0.00966191		3.11042	4.17373	-0.0103176		3.11042	4.19672	0.00720024		3.11042	4.16579	-0.0141501		3.11042	4.15334	0.00264645		3.11042	4.181	-0.00993609		3.11042	4.19402	0.0108182		3.11042	4.16511	-0.0212669		3.11042	4.22764	-0.013417
3.11762	4.18169	-0.0152826		3.11762	4.18235	-0.000113249		3.11762	4.15829	-0.0114739		3.11762	4.17475	-0.00929833		3.11762	4.19686	0.00733733		3.11762	4.16636	-0.0135839		3.11762	4.15232	0.00163317		3.11762	4.17907	-0.0118673		3.11762	4.19318	0.00997782		3.11762	4.16648	-0.019902		3.11762	4.22686	-0.0141919
3.12482	4.18426	-0.0127077		3.12482	4.17879	-0.00367761		3.12482	4.15863	-0.0111341		3.12482	4.17539	-0.00866056		3.12482	4.19627	0.00674725		3.12482	4.16714	-0.0128031		3.12482	4.15179	0.00109673		3.12482	4.17706	-0.013876		3.12482	4.19201	0.00880361		3.12482	4.16821	-0.0181675		3.12482	4.22725	-0.0138044
3.13202	4.18655	-0.0104189		3.13202	4.17541	-0.00705123		3.13202	4.16116	-0.00861287		3.13202	4.17597	-0.00808239		3.13202	4.19494	0.00541806		3.13202	4.16794	-0.0120044		3.13202	4.15204	0.00134707		3.13202	4.1753	-0.0156403		3.13202	4.19077	0.00756979		3.13202	4.17012	-0.0162601		3.13202	4.22881	-0.0122488
3.13922	4.18825	-0.00872612		3.13922	4.17244	-0.0100255		3.13922	4.16557	-0.00419617		3.13922	4.17683	-0.00721812		3.13922	4.193	0.00348091		3.13922	4.16856	-0.0113845		3.13922	4.15322	0.0025332		3.13922	4.17413	-0.0168085		3.13922	4.18968	0.00647902		3.13922	4.172	-0.0143826		3.13922	4.2312	-0.00985265
3.14642	4.18917	-0.00780225		3.14642	4.17004	-0.0124276		3.14642	4.17127	0.00150204		3.14642	4.17824	-0.00581145		3.14642	4.19072	0.00119805		3.14642	4.16884	-0.0111043		3.14642	4.15533	0.00463724		3.14642	4.17388	-0.0170588		3.14642	4.18882	0.00561476		3.14642	4.1737	-0.0126779		3.14642	4.23387	-0.00718236
3.15362	4.18937	-0.00760555		3.15362	4.16827	-0.0141919		3.15362	4.17736	0.00759363		3.15362	4.1803	-0.00374913		3.15362	4.1884	-0.00112057		3.15362	4.16865	-0.0112891		3.15362	4.15806	0.0073731		3.15362	4.17475	-0.0161946		3.15362	4.18821	0.00500679		3.15362	4.1752	-0.0111759		3.15362	4.23625	-0.00481009
3.16082	4.18903	-0.0079453		3.16082	4.16711	-0.0153542		3.16082	4.18286	0.0130892		3.16082	4.18292	-0.00113249		3.16082	4.18636	-0.00316501		3.16082	4.16792	-0.0120223		3.16082	4.16107	0.0103831		3.16082	4.17674	-0.0142038		3.16082	4.1879	0.00469685		3.16082	4.17654	-0.00984073		3.16082	4.23785	-0.00320077
3.16802	4.18835	-0.00861883		3.16802	4.16647	-0.0159919		3.16802	4.1869	0.0171304		3.16802	4.18579	0.00174046		3.16802	4.18488	-0.0046432		3.16802	4.1666	-0.0133455		3.16802	4.16396	0.013274		3.16802	4.17959	-0.0113487		3.16802	4.18785	0.0046432		3.16802	4.17775	-0.00863075		3.16802	4.23843	-0.0026226
3.17522	4.18742	-0.00955462		3.17522	4.16629	-0.0161707		3.17522	4.18893	0.0191629		3.17522	4.18856	0.00450611		3.17522	4.18416	-0.00535846		3.17522	4.16472	-0.015223		3.17522	4.16638	0.0156939		3.17522	4.18286	-0.00808239		3.17522	4.18786	0.00466108		3.17522	4.17886	-0.00752211		3.17522	4.2379	-0.00315309
3.18242	4.18626	-0.010711		3.18242	4.16654	-0.0159264		3.18242	4.18882	0.0190556		3.18242	4.19081	0.00675917		3.18242	4.18432	-0.00520349		3.18242	4.16247	-0.0174701		3.18242	4.168	0.0173151		3.18242	4.18591	-0.00503063		3.18242	4.18763	0.00442863		3.18242	4.17986	-0.00652075		3.18242	4.23638	-0.00467896
3.18962	4.18492	-0.0120521		3.18962	4.16709	-0.015372		3.18962	4.18679	0.0170231		3.18962	4.19223	0.00817776		3.18962	4.18524	-0.00428557		3.18962	4.1602	-0.019747		3.18962	4.16855	0.0178576		3.18962	4.18818	-0.0027597		3.18962	4.18686	0.00365376		3.18962	4.18067	-0.00571012		3.18962	4.23412	-0.00693798
3.19682	4.18347	-0.0135064		3.19682	4.16776	-0.0147045		3.19682	4.18328	0.0135124		3.19682	4.19258	0.00852942		3.19682	4.1867	-0.00282526		3.19682	4.15831	-0.0216365		3.19682	4.16788	0.01719		3.19682	4.18929	-0.00165105		3.19682	4.1854	0.00219345		3.19682	4.18116	-0.00522137		3.19682	4.2315	-0.00955462
3.20402	4.18194	-0.0150323		3.20402	4.16833	-0.0141382		3.20402	4.17888	0.00910759		3.20402	4.19177	0.0077188		3.20402	4.1884	-0.00112057		3.20402	4.15722	-0.0227213		3.20402	4.16613	0.0154376		3.20402	4.18915	-0.00178814		3.20402	4.18332	0.000119209		3.20402	4.18116	-0.00522137		3.20402	4.22893	-0.0121295
3.21122	4.18039	-0.016582		3.21122	4.16873	-0.0137389		3.21122	4.17426	0.00449419		3.21122	4.18981	0.00576377		3.21122	4.19005	0.000530481		3.21122	4.15722	-0.0227273		3.21122	4.16362	0.0129282		3.21122	4.18794	-0.00299811		3.21122	4.18081	-0.00239611		3.21122	4.18055	-0.00582933		3.21122	4.22663	-0.0144243
3.21842	4.17894	-0.0180364		3.21842	4.16902	-0.0134468		3.21842	4.17008	0.000315905		3.21842	4.18689	0.00284314		3.21842	4.19137	0.0018537		3.21842	4.15839	-0.021553		3.21842	4.16079	0.010103		3.21842	4.18596	-0.00497699		3.21842	4.1781	-0.00510216		3.21842	4.17938	-0.00699759		3.21842	4.22467	-0.0163853
3.22562	4.17776	-0.0192165		3.22562	4.16933	-0.0131309		3.22562	4.16681	-0.00296235		3.22562	4.18327	-0.00077486		3.22562	4.19215	0.00262856		3.22562	4.1607	-0.0192404		3.22562	4.15809	0.00739694		3.22562	4.18357	-0.00736713		3.22562	4.1755	-0.00770092		3.22562	4.17787	-0.00850558		3.22562	4.22298	-0.0180721
3.23282	4.17702	-0.0199497		3.23282	4.16978	-0.0126839		3.23282	4.16461	-0.00516176		3.23282	4.17924	-0.00481009		3.23282	4.19226	0.00273585		3.23282	4.16393	-0.0160098		3.23282	4.15584	0.0051558		3.23282	4.18113	-0.00980496		3.23282	4.17331	-0.00989437		3.23282	4.17634	-0.0100374		3.23282	4.22149	-0.0195622
3.24002	4.17674	-0.0202358		3.24002	4.17038	-0.0120878		3.24002	4.16338	-0.00638366		3.24002	4.17507	-0.00898242		3.24002	4.19171	0.00219345		3.24002	4.16776	-0.0121832		3.24002	4.15439	0.00370145		3.24002	4.17897	-0.0119686		3.24002	4.17168	-0.0115216		3.24002	4.17514	-0.0112414		3.24002	4.22017	-0.0208855
3.24722	4.17669	-0.0202775		3.24722	4.17116	-0.011307		3.24722	4.16285	-0.00691414		3.24722	4.17103	-0.0130177		3.24722	4.19074	0.00121593		3.24722	4.17178	-0.00816584		3.24722	4.15399	0.0033021		3.24722	4.17732	-0.0136197		3.24722	4.17062	-0.0125825		3.24722	4.17461	-0.011766		3.24722	4.21903	-0.0220299
3.25442	4.17661	-0.0203609		3.25442	4.17217	-0.0102937		3.25442	4.16276	-0.00700951		3.25442	4.1674	-0.0166535		3.25442	4.18965	0.00012517		3.25442	4.17559	-0.0043571		3.25442	4.1548	0.00410676		3.25442	4.17623	-0.0147104		3.25442	4.16996	-0.0132442		3.25442	4.17502	-0.0113606		3.25442	4.21802	-0.0230312
3.26162	4.17625	-0.0207245		3.26162	4.1734	-0.00906587		3.26162	4.16281	-0.00695586		3.26162	4.16441	-0.0196397		3.26162	4.18873	-0.000786781		3.26162	4.17883	-0.00110865		3.26162	4.15683	0.00613928		3.26162	4.1756	-0.0153422		3.26162	4.16948	-0.0137269		3.26162	4.17641	-0.00997186		3.26162	4.21716	-0.0238955
3.26882	4.17548	-0.0214875		3.26882	4.17475	-0.0077188		3.26882	4.16278	-0.00698566		3.26882	4.16232	-0.0217319		3.26882	4.1882	-0.00131726		3.26882	4.18131	0.00136495		3.26882	4.15995	0.00926256		3.26882	4.17522	-0.0157177		3.26882	4.16896	-0.0142455		3.26882	4.17858	-0.00779629		3.26882	4.21647	-0.0245869
3.27602	4.17427	-0.0227034		3.27602	4.17604	-0.00641942		3.27602	4.16249	-0.00727773		3.27602	4.16127	-0.0227749		3.27602	4.18816	-0.00136495		3.27602	4.18291	0.00296831		3.27602	4.16392	0.0132322		3.27602	4.17497	-0.015974		3.27602	4.16821	-0.0149906		3.27602	4.18119	-0.00519156		3.27602	4.21602	-0.025034
3.28322	4.17264	-0.0243366		3.28322	4.1772	-0.00526309		3.28322	4.16185	-0.00792146		3.28322	4.16135	-0.0227034		3.28322	4.18861	-0.000911951		3.28322	4.1837	0.00376105		3.28322	4.16841	0.0177205		3.28322	4.17482	-0.0161231		3.28322	4.16713	-0.0160754		3.28322	4.18386	-0.00252128		3.28322	4.21585	-0.0252008
3.29042	4.17078	-0.0261962		3.29042	4.1782	-0.00426173		3.29042	4.16092	-0.00885129		3.29042	4.16248	-0.021565		3.29042	4.18953	1.19209e-05		3.29042	4.18383	0.00389218		3.29042	4.17297	0.0222862		3.29042	4.17486	-0.0160754		3.29042	4.16563	-0.0175774		3.29042	4.18629	-8.9407e-05		3.29042	4.21588	-0.025171
3.29762	4.16906	-0.0279129		3.29762	4.17911	-0.00334978		3.29762	4.15991	-0.00985861		3.29762	4.16446	-0.019592		3.29762	4.19076	0.00123978		3.29762	4.18348	0.00354052		3.29762	4.1771	0.0264108		3.29762	4.1752	-0.0157416		3.29762	4.16376	-0.019443		3.29762	4.18834	0.00196099		3.29762	4.21596	-0.0250995
3.30482	4.16796	-0.0290155		3.30482	4.18003	-0.00243187		3.30482	4.1591	-0.0106692		3.30482	4.16682	-0.0172257		3.30482	4.19203	0.00250936		3.30482	4.18277	0.00283122		3.30482	4.18034	0.0296474		3.30482	4.17582	-0.0151157		3.30482	4.16169	-0.0215113		3.30482	4.18998	0.00360012		3.30482	4.21594	-0.0251114
3.31202	4.16783	-0.0291407		3.31202	4.18102	-0.00144839		3.31202	4.15877	-0.0109971		3.31202	4.16911	-0.0149429		3.31202	4.19297	0.00345111		3.31202	4.18178	0.00183582		3.31202	4.18232	0.0316322		3.31202	4.17667	-0.0142694		3.31202	4.15962	-0.0235856		3.31202	4.19124	0.00485778		3.31202	4.21582	-0.0252306
3.31922	4.16877	-0.0282049		3.31922	4.18211	-0.000357628		3.31922	4.15919	-0.0105798		3.31922	4.17087	-0.0131786		3.31922	4.19328	0.00375509		3.31922	4.18057	0.000631809		3.31922	4.18289	0.0322044		3.31922	4.17762	-0.0133216		3.31922	4.15773	-0.025475		3.31922	4.19225	0.0058651		3.31922	4.21562	-0.0254393
3.32642	4.17058	-0.026387		3.32642	4.18335	0.000882149		3.32642	4.16052	-0.00925064		3.32642	4.17185	-0.0122011		3.32642	4.19288	0.0033617		3.32642	4.17929	-0.000649691		3.32642	4.18203	0.0313461		3.32642	4.1786	-0.0123441		3.32642	4.15627	-0.0269353		3.32642	4.19314	0.00675917		3.32642	4.21527	-0.025785
3.33362	4.17294	-0.0240326		3.33362	4.18472	0.00225902		3.33362	4.16287	-0.00690222		3.33362	4.17203	-0.0120163		3.33362	4.19197	0.00244975		3.33362	4.1781	-0.00184178		3.33362	4.17988	0.0291884		3.33362	4.17958	-0.0113606		3.33362	4.15542	-0.0277817		3.33362	4.19402	0.00764132		3.33362	4.21472	-0.0263333
3.34082	4.17547	-0.0214994		3.34082	4.18618	0.00371337		3.34082	4.16627	-0.00349879		3.34082	4.1716	-0.0124514		3.34082	4.19079	0.00126958		3.34082	4.17712	-0.00282526		3.34082	4.17674	0.0260532		3.34082	4.1806	-0.0103354		3.34082	4.15535	-0.0278533		3.34082	4.19486	0.00847578		3.34082	4.21396	-0.0270903
3.34802	4.17781	-0.0191569		3.34802	4.18759	0.005126		3.34802	4.17063	0.000858307		3.34802	4.17076	-0.0132859		3.34802	4.18959	7.15256e-05		3.34802	4.17641	-0.00352859		3.34802	4.17307	0.0223815		3.34802	4.18171	-0.00923276		3.34802	4.15611	-0.0270903		3.34802	4.19551	0.00913143		3.34802	4.2131	-0.0279546
3.35522	4.17966	-0.0173151		3.35522	4.18884	0.0063777		3.35522	4.1757	0.00593066		3.35522	4.1698	-0.0142515		3.35522	4.18859	-0.000935793		3.35522	4.17605	-0.00389218		3.35522	4.16934	0.0186503		3.35522	4.18291	-0.00802875		3.35522	4.15769	-0.0255108		3.35522	4.19583	0.00944734		3.35522	4.21229	-0.0287652
3.36242	4.18077	-0.0162065		3.36242	4.18988	0.00741482		3.36242	4.1811	0.0113308		3.36242	4.16898	-0.015074		3.36242	4.18803	-0.00149012		3.36242	4.1761	-0.0038445		3.36242	4.1659	0.0152111		3.36242	4.18419	-0.00674725		3.36242	4.15992	-0.0232816		3.36242	4.19571	0.00932813		3.36242	4.21164	-0.0294149
3.36962	4.1811	-0.0158727		3.36962	4.19073	0.0082612		3.36962	4.1864	0.0166297		3.36962	4.16843	-0.0156164		3.36962	4.18826	-0.00126362		3.36962	4.17664	-0.0033021		3.36962	4.163	0.0123084		3.36962	4.18549	-0.00544786		3.36962	4.16256	-0.020647		3.36962	4.19515	0.00876784		3.36962	4.21124	-0.0298202
3.37682	4.18077	-0.0162005		3.37682	4.19143	0.00896454		3.37682	4.19123	0.0214577		3.37682	4.16819	-0.0158608		3.37682	4.18944	-7.7486e-05		3.37682	4.17771	-0.00223517		3.37682	4.16075	0.0100613		3.37682	4.18676	-0.00417829		3.37682	4.16527	-0.017935		3.37682	4.19416	0.00777841		3.37682	4.21116	-0.0298917
3.38402	4.17998	-0.0169873		3.38402	4.19206	0.00959635		3.38402	4.1953	0.0255287		3.38402	4.16802	-0.0160277		3.38402	4.19141	0.00188947		3.38402	4.17925	-0.000691414		3.38402	4.1593	0.00861287		3.38402	4.18794	-0.00299811		3.38402	4.16769	-0.0155091		3.38402	4.19273	0.00634789		3.38402	4.21156	-0.0294983
3.39122	4.17896	-0.0180125		3.39122	4.19265	0.0101864		3.39122	4.19838	0.0286102		3.39122	4.16757	-0.0164747		3.39122	4.19363	0.00411272		3.39122	4.18113	0.00119209		3.39122	4.15869	0.00799894		3.39122	4.18901	-0.00192523		3.39122	4.16949	-0.013715		3.39122	4.19081	0.00443459		3.39122	4.21252	-0.0285327
3.39842	4.17793	-0.0190437		3.39842	4.19326	0.0108004		3.39842	4.20029	0.0305235		3.39842	4.16656	-0.017494		3.39842	4.19552	0.00599623		3.39842	4.18322	0.00327826		3.39842	4.15883	0.00814199		3.39842	4.18996	-0.000983477		3.39842	4.17042	-0.0127792		3.39842	4.18845	0.00206828		3.39842	4.21403	-0.0270247
3.40562	4.17715	-0.0198185		3.40562	4.1939	0.0114322		3.40562	4.20092	0.0311494		3.40562	4.16484	-0.0192046		3.40562	4.19667	0.0071466		3.40562	4.18543	0.00548959		3.40562	4.15954	0.00885129		3.40562	4.19078	-0.000160933		3.40562	4.17042	-0.0127792		3.40562	4.18574	-0.00063777		3.40562	4.21593	-0.0251234
3.41282	4.17687	-0.0201046		3.41282	4.19446	0.0119984		3.41282	4.2003	0.0305355		3.41282	4.16256	-0.0214934		3.41282	4.19689	0.00736713		3.41282	4.18766	0.00771284		3.41282	4.16062	0.00993013		3.41282	4.19155	0.000613928		3.41282	4.16964	-0.0135601		3.41282	4.18289	-0.00349283		3.41282	4.21803	-0.0230253
3.42002	4.17722	-0.019753		3.42002	4.19477	0.0123024		3.42002	4.19859	0.0288248		3.42002	4.15989	-0.0241637		3.42002	4.19614	0.00661612		3.42002	4.18972	0.00977516		3.42002	4.16195	0.0112593		3.42002	4.19238	0.00144243		3.42002	4.1684	-0.0148058		3.42002	4.1801	-0.00628233		3.42002	4.22015	-0.0209033
3.42722	4.17828	-0.018692		3.42722	4.1945	0.0120401		3.42722	4.19595	0.0261784		3.42722	4.1571	-0.0269473		3.42722	4.19444	0.00492334		3.42722	4.19136	0.0114143		3.42722	4.16346	0.0127733		3.42722	4.19337	0.00243187		3.42722	4.16707	-0.016135		3.42722	4.17764	-0.00873804		3.42722	4.22217	-0.0188828
3.43442	4.18009	-0.01688		3.43442	4.19344	0.0109792		3.43442	4.19248	0.0227153		3.43442	4.1545	-0.029552		3.43442	4.19201	0.00249147		3.43442	4.19229	0.0123501		3.43442	4.16505	0.0143647		3.43442	4.19452	0.00357628		3.43442	4.16591	-0.0172913		3.43442	4.17582	-0.010556		3.43442	4.224	-0.0170588
3.44162	4.1827	-0.0142753		3.44162	4.19145	0.00898838		3.44162	4.18832	0.018549		3.44162	4.15242	-0.0316322		3.44162	4.18931	-0.000214577		3.44162	4.19234	0.0123978		3.44162	4.16658	0.0158906		3.44162	4.19563	0.00469089		3.44162	4.16502	-0.0181794		3.44162	4.175	-0.0113785		3.44162	4.22557	-0.0154853
3.44882	4.18606	-0.0109076		3.44882	4.18857	0.00610352		3.44882	4.1837	0.0139296		3.44882	4.15117	-0.0328839		3.44882	4.18684	-0.00268221		3.44882	4.19143	0.0114858		3.44882	4.16787	0.0171781		3.44882	4.19636	0.00542402		3.44882	4.16434	-0.0188649		3.44882	4.17542	-0.0109553		3.44882	4.22692	-0.0141323
3.45602	4.19002	-0.00695586		3.45602	4.18499	0.00252128		3.45602	4.17901	0.00924468		3.45602	4.15096	-0.0330925		3.45602	4.18501	-0.00451207		3.45602	4.1896	0.00966191		3.45602	4.16886	0.0181735		3.45602	4.19627	0.00533462		3.45602	4.16373	-0.0194728		3.45602	4.17711	-0.00926852		3.45602	4.2281	-0.012958
3.46322	4.19416	-0.00280738		3.46322	4.18103	-0.00143647		3.46322	4.1747	0.0049293		3.46322	4.15189	-0.0321627		3.46322	4.18394	-0.00558496		3.46322	4.18701	0.00706911		3.46322	4.16957	0.0188828		3.46322	4.19503	0.00408888		3.46322	4.16306	-0.0201404		3.46322	4.17975	-0.006634		3.46322	4.2291	-0.0119507
3.47042	4.1981	0.00112653		3.47042	4.1771	-0.00536442		3.47042	4.17112	0.00134707		3.47042	4.15395	-0.0300944		3.47042	4.18347	-0.00605583		3.47042	4.18393	0.00398755		3.47042	4.16997	0.0192821		3.47042	4.19244	0.00150204		3.47042	4.16218	-0.0210226		3.47042	4.18279	-0.0035882		3.47042	4.22989	-0.0111699
3.47762	4.20143	0.00445843		3.47762	4.17363	-0.00883341		3.47762	4.16842	-0.00134707		3.47762	4.15706	-0.026989		3.47762	4.18339	-0.00612736		3.47762	4.18082	0.000882149		3.47762	4.16995	0.0192583		3.47762	4.18866	-0.0022769		3.47762	4.16096	-0.0222445		3.47762	4.18562	-0.000756979		3.47762	4.23037	-0.0106871
3.48482	4.20392	0.00694394		3.48482	4.17095	-0.0115156		3.48482	4.16663	-0.0031352		3.48482	4.16098	-0.023067		3.48482	4.18344	-0.00607967		3.48482	4.17827	-0.00167489		3.48482	4.16936	0.0186741		3.48482	4.18404	-0.00689626		3.48482	4.15941	-0.0237882		3.48482	4.18776	0.00137687		3.48482	4.2305	-0.010556
3.49202	4.20541	0.00844002		3.49202	4.16918	-0.0132799		3.49202	4.16567	-0.00409484		3.49202	4.16535	-0.018698		3.49202	4.18332	-0.00619888		3.49202	4.17678	-0.00315905		3.49202	4.16819	0.0174999		3.49202	4.17916	-0.0117838		3.49202	4.15784	-0.0253677		3.49202	4.1889	0.00252128		3.49202	4.23031	-0.0107467
3.49922	4.20583	0.00885725		3.49922	4.16828	-0.0141799		3.49922	4.16541	-0.00436306		3.49922	4.16976	-0.0142932		3.49922	4.18283	-0.00668764		3.49922	4.17663	-0.00331402		3.49922	4.16644	0.0157535		3.49922	4.1746	-0.0163376		3.49922	4.15665	-0.0265539		3.49922	4.18898	0.00260472		3.49922	4.22988	-0.0111759
3.50642	4.2051	0.00813007		3.50642	4.168	-0.014466		3.50642	4.16566	-0.00410676		3.50642	4.17383	-0.0102162		3.50642	4.18194	-0.00758171		3.50642	4.17771	-0.00222921		3.50642	4.1642	0.0135064		3.50642	4.17094	-0.0199974		3.50642	4.15636	-0.02684		3.50642	4.18819	0.00181198		3.50642	4.22933	-0.0117242
3.51362	4.20326	0.00628829		3.51362	4.16805	-0.0144184		3.51362	4.16618	-0.0035882		3.51362	4.1773	-0.00675321		3.51362	4.18086	-0.00866055		3.51362	4.17967	-0.000274181		3.51362	4.16151	0.0108182		3.51362	4.16861	-0.0223339		3.51362	4.15726	-0.0259459		3.51362	4.18692	0.000536442		3.51362	4.22881	-0.0122488
3.52082	4.20038	0.00340939		3.52082	4.16815	-0.014317		3.52082	4.16672	-0.0030458		3.52082	4.17997	-0.00407696		3.52082	4.17987	-0.00965595		3.52082	4.18199	0.00204444		3.52082	4.15848	0.00779033		3.52082	4.16781	-0.0231326		3.52082	4.15936	-0.0238419		3.52082	4.18569	-0.000691414		3.52082	4.22847	-0.0125885
3.52802	4.19664	-0.000333786		3.52802	4.16817	-0.0142932		3.52802	4.16716	-0.00260472		3.52802	4.18177	-0.00228286		3.52802	4.17915	-0.0103712		3.52802	4.18416	0.00422001		3.52802	4.15527	0.0045836		3.52802	4.16846	-0.0224769		3.52802	4.16255	-0.020653		3.52802	4.18495	-0.00143051		3.52802	4.22838	-0.0126779
3.53522	4.19222	-0.00475049		3.53522	4.16816	-0.0143051		3.53522	4.1676	-0.00216961		3.53522	4.18273	-0.00131726		3.53522	4.17875	-0.0107706		3.53522	4.18572	0.00578165		3.53522	4.15214	0.00144839		3.53522	4.17024	-0.0207007		3.53522	4.16659	-0.0166118		3.53522	4.18488	-0.00150204		3.53522	4.22847	-0.0125885
3.54242	4.18735	-0.00962019		3.54242	4.16832	-0.0141442		3.54242	4.16824	-0.00153184		3.54242	4.18309	-0.000959635		3.54242	4.17868	-0.0108421		3.54242	4.18633	0.00638366		3.54242	4.1493	-0.00138879		3.54242	4.17265	-0.0182867		3.54242	4.17118	-0.0120223		3.54242	4.18531	-0.00106692		3.54242	4.22855	-0.0125051
3.54962	4.1823	-0.0146747		3.54962	4.16892	-0.0135422		3.54962	4.16924	-0.000524521		3.54962	4.18318	-0.000870228		3.54962	4.17899	-0.0105321		3.54962	4.18583	0.00588894		3.54962	4.14694	-0.00374913		3.54962	4.1752	-0.0157416		3.54962	4.17593	-0.00727773		3.54962	4.18586	-0.00051856		3.54962	4.22843	-0.0126243
3.55682	4.17742	-0.0195563		3.55682	4.1702	-0.0122607		3.55682	4.17063	0.000858307		3.55682	4.18335	-0.000697374		3.55682	4.1797	-0.00982285		3.55682	4.18439	0.00444651		3.55682	4.14516	-0.00552535		3.55682	4.17749	-0.0134468		3.55682	4.18032	-0.00288486		3.55682	4.18607	-0.000309944		3.55682	4.22792	-0.0131309
3.56402	4.17316	-0.0238121		3.56402	4.17229	-0.0101745		3.56402	4.17221	0.00244379		3.56402	4.18387	-0.000178814		3.56402	4.18073	-0.00879169		3.56402	4.18237	0.00243187		3.56402	4.14407	-0.00662208		3.56402	4.17933	-0.011605		3.56402	4.1839	0.000697374		3.56402	4.1856	-0.000780821		3.56402	4.22699	-0.0140607
3.57122	4.17008	-0.0268877		3.57122	4.17514	-0.00732541		3.57122	4.17377	0.00400543		3.57122	4.18479	0.000739097		3.57122	4.1819	-0.00761747		3.57122	4.18024	0.000298023		3.57122	4.14369	-0.00700355		3.57122	4.18063	-0.0103116		3.57122	4.18642	0.00321865		3.57122	4.18426	-0.00211596		3.57122	4.22563	-0.0154257
3.57842	4.16861	-0.0283659		3.57842	4.17853	-0.00393391		3.57842	4.17508	0.00531077		3.57842	4.18606	0.00201464		3.57842	4.18309	-0.00643134		3.57842	4.17829	-0.00165105		3.57842	4.14398	-0.00671148		3.57842	4.18136	-0.00958443		3.57842	4.1878	0.00459552		3.57842	4.18215	-0.00422597		3.57842	4.2239	-0.0171542
3.58562	4.1689	-0.0280678		3.58562	4.18209	-0.000369549		3.58562	4.17593	0.00615716		3.58562	4.18761	0.0035584		3.58562	4.18425	-0.00527501		3.58562	4.17662	-0.00332594		3.58562	4.14482	-0.00587106		3.58562	4.18155	-0.00938773		3.58562	4.18805	0.00484586		3.58562	4.17965	-0.00672936		3.58562	4.22198	-0.0190735
3.59282	4.17085	-0.0261247		3.59282	4.18542	0.00295639		3.59282	4.17619	0.00642538		3.59282	4.18935	0.00529885		3.59282	4.18537	-0.00415444		3.59282	4.17507	-0.00487566		3.59282	4.14603	-0.00465512		3.59282	4.18133	-0.00961423		3.59282	4.18722	0.00401735		3.59282	4.17736	-0.00902414		3.59282	4.2201	-0.020951
3.60002	4.17406	-0.022912		3.60002	4.18816	0.00569224		3.60002	4.17587	0.00610352		3.60002	4.19117	0.00712276		3.60002	4.18633	-0.00318885		3.60002	4.17342	-0.00652671		3.60002	4.14748	-0.00321269		3.60002	4.18082	-0.0101149		3.60002	4.18543	0.00222921		3.60002	4.17585	-0.0105262		3.60002	4.21853	-0.0225246
3.60722	4.17798	-0.01899		3.60722	4.19021	0.0077486		3.60722	4.17511	0.00534654		3.60722	4.19294	0.00889301		3.60722	4.18689	-0.00262856		3.60722	4.17144	-0.00850558		3.60722	4.14904	-0.00164509		3.60722	4.18025	-0.0106931		3.60722	4.18286	-0.000339746		3.60722	4.17551	-0.0108719		3.60722	4.21736	-0.0236928
3.61442	4.18196	-0.0150084		3.61442	4.19171	0.00924468		3.61442	4.1742	0.00443459		3.61442	4.19445	0.010401		3.61442	4.18675	-0.00277162		3.61442	4.169	-0.0109434		3.61442	4.15067	-1.7881e-05		3.61442	4.17975	-0.0111938		3.61442	4.17981	-0.0033915		3.61442	4.17632	-0.0100553		3.61442	4.21658	-0.0244796
3.62162	4.1853	-0.0116706		3.62162	4.19292	0.0104606		3.62162	4.1734	0.00363588		3.62162	4.19555	0.0115037		3.62162	4.18578	-0.00374317		3.62162	4.16612	-0.0138223		3.62162	4.15232	0.00163317		3.62162	4.17939	-0.0115514		3.62162	4.17653	-0.00666976		3.62162	4.17796	-0.00841618		3.62162	4.21604	-0.0250161
3.62882	4.18736	-0.00961423		3.62882	4.19412	0.0116527		3.62882	4.17294	0.00317097		3.62882	4.1962	0.0121474		3.62882	4.18404	-0.00548363		3.62882	4.16298	-0.0169635		3.62882	4.15398	0.00329018		3.62882	4.17913	-0.0118136		3.62882	4.17328	-0.00991821		3.62882	4.17992	-0.00646114		3.62882	4.21569	-0.0253618
3.63602	4.18777	-0.009197		3.63602	4.19549	0.0130236		3.63602	4.17295	0.00317693		3.63602	4.19638	0.0123262		3.63602	4.18169	-0.00783205		3.63602	4.15992	-0.0200272		3.63602	4.15566	0.00497103		3.63602	4.17882	-0.0121176		3.63602	4.1703	-0.0129044		3.63602	4.18154	-0.0048399		3.63602	4.21554	-0.0255167
3.64322	4.18653	-0.0104427		3.64322	4.19708	0.0146151		3.64322	4.17346	0.00369549		3.64322	4.19608	0.0120342		3.64322	4.17901	-0.0105143		3.64322	4.15736	-0.0225842		3.64322	4.15739	0.00669956		3.64322	4.17827	-0.012666		3.64322	4.16782	-0.015378		3.64322	4.18221	-0.00417233		3.64322	4.21559	-0.0254691
3.65042	4.18392	-0.0130475		3.65042	4.19888	0.0164151		3.65042	4.17444	0.00466704		3.65042	4.1953	0.0112534		3.65042	4.17628	-0.0132382		3.65042	4.1558	-0.0241458		3.65042	4.15914	0.00845194		3.65042	4.17733	-0.0136077		3.65042	4.16607	-0.0171363		3.65042	4.18153	-0.00484586		3.65042	4.21578	-0.0252783
3.65762	4.18041	-0.0165582		3.65762	4.20074	0.0182807		3.65762	4.17567	0.00590086		3.65762	4.19406	0.0100136		3.65762	4.17387	-0.0156462		3.65762	4.15556	-0.0243783		3.65762	4.16086	0.0101686		3.65762	4.17596	-0.0149846		3.65762	4.16514	-0.0180662		3.65762	4.17942	-0.00695586		3.65762	4.21596	-0.0250995
3.66482	4.17653	-0.0204444		3.66482	4.20243	0.0199676		3.66482	4.17693	0.00716448		3.66482	4.19244	0.00839233		3.66482	4.17213	-0.0173867		3.66482	4.15676	-0.0231862		3.66482	4.16238	0.0116944		3.66482	4.17417	-0.0167727		3.66482	4.16495	-0.0182569		3.66482	4.1762	-0.0101805		3.66482	4.21598	-0.0250757
3.67202	4.17276	-0.0242114		3.67202	4.20366	0.0211954		3.67202	4.17811	0.00834465		3.67202	4.19053	0.00647902		3.67202	4.17131	-0.0182152		3.67202	4.15918	-0.0207603		3.67202	4.16349	0.0128031		3.67202	4.17209	-0.018847		3.67202	4.16536	-0.0178397		3.67202	4.17243	-0.0139475		3.67202	4.21574	-0.0253141
3.67922	4.16956	-0.0274122		3.67922	4.20427	0.0218034		3.67922	4.17922	0.0094533		3.67922	4.18838	0.00433326		3.67922	4.17144	-0.018084		3.67922	4.16247	-0.0174701		3.67922	4.16402	0.0133276		3.67922	4.16993	-0.0210106		3.67922	4.16625	-0.0169516		3.67922	4.16883	-0.0175476		3.67922	4.21516	-0.0258982
3.68642	4.16727	-0.029701		3.68642	4.20423	0.0217676		3.68642	4.18032	0.01055		3.68642	4.18609	0.00204444		3.68642	4.17233	-0.01719		3.68642	4.16622	-0.013721		3.68642	4.16396	0.013268		3.68642	4.16795	-0.0229895		3.68642	4.16752	-0.0156879		3.68642	4.16604	-0.0203371		3.68642	4.21416	-0.0268936
3.69362	4.16603	-0.0309408		3.69362	4.20363	0.0211656		3.69362	4.1814	0.0116348		3.69362	4.18379	-0.0002563		3.69362	4.17368	-0.0158429		3.69362	4.17013	-0.00981092		3.69362	4.16348	0.0127912		3.69362	4.16654	-0.0243962		3.69362	4.16908	-0.0141263		3.69362	4.16455	-0.0218272		3.69362	4.21274	-0.0283182
3.70082	4.16574	-0.0312269		3.70082	4.20257	0.0201106		3.70082	4.1824	0.0126302		3.70082	4.18169	-0.00235438		3.70082	4.17514	-0.0143766		3.70082	4.17399	-0.0059545		3.70082	4.16292	0.0122309		3.70082	4.16602	-0.0249207		3.70082	4.17087	-0.0123322		3.70082	4.16453	-0.0218451		3.70082	4.211	-0.0300527
3.70802	4.16619	-0.0307858		3.70802	4.2011	0.0186324		3.70802	4.18323	0.0134587		3.70802	4.17998	-0.004071		3.70802	4.17646	-0.0130653		3.70802	4.1776	-0.00234246		3.70802	4.16268	0.0119925		3.70802	4.16657	-0.0243664		3.70802	4.17284	-0.0103652		3.70802	4.16588	-0.020498		3.70802	4.20918	-0.0318766
3.71522	4.16711	-0.0298619		3.71522	4.19916	0.0166953		3.71522	4.18393	0.0141621		3.71522	4.17876	-0.00529289		3.71522	4.1774	-0.0121236		3.71522	4.18081	0.000864267		3.71522	4.16316	0.0124693		3.71522	4.16818	-0.0227571		3.71522	4.17495	-0.00825524		3.71522	4.16823	-0.0181496		3.71522	4.20757	-0.0334859
3.72242	4.16836	-0.0286102		3.72242	4.19673	0.0142634		3.72242	4.18463	0.0148594		3.72242	4.17814	-0.00590682		3.72242	4.17785	-0.0116706		3.72242	4.1835	0.0035584		3.72242	4.16468	0.0139952		3.72242	4.17062	-0.0203192		3.72242	4.17717	-0.00603795		3.72242	4.17114	-0.0152349		3.72242	4.20642	-0.0346363
3.72962	4.16981	-0.0271618		3.72962	4.19381	0.0113428		3.72962	4.18535	0.0155866		3.72962	4.17824	-0.00581145		3.72962	4.17777	-0.011754		3.72962	4.18566	0.00571609		3.72962	4.16741	0.0167251		3.72962	4.17361	-0.017333		3.72962	4.17939	-0.0038147		3.72962	4.1742	-0.0121772		3.72962	4.20583	-0.0352204
3.73682	4.17133	-0.0256419		3.73682	4.19047	0.0080049		3.73682	4.18597	0.0162065		3.73682	4.17906	-0.00498891		3.73682	4.17717	-0.0123501		3.73682	4.18735	0.00740886		3.73682	4.17126	0.0205696		3.73682	4.17681	-0.0141323		3.73682	4.18139	-0.00181198		3.73682	4.17705	-0.00933409		3.73682	4.20586	-0.0351965
3.74402	4.1728	-0.0241697		3.74402	4.1869	0.00444055		3.74402	4.18625	0.0164807		3.74402	4.1804	-0.0036478		3.74402	4.17622	-0.0133038		3.74402	4.18861	0.00866652		3.74402	4.17587	0.025183		3.74402	4.1799	-0.0110388		3.74402	4.18287	-0.000333786		3.74402	4.17941	-0.00696778		3.74402	4.20647	-0.0345886
3.75122	4.1742	-0.022769		3.75122	4.18338	0.000911951		3.75122	4.18589	0.0161171		3.75122	4.18181	-0.00223517		3.75122	4.1751	-0.0144243		3.75122	4.18936	0.00941753		3.75122	4.18067	0.0299811		3.75122	4.18258	-0.00836253		3.75122	4.18355	0.000351667		3.75122	4.18118	-0.00519753		3.75122	4.20761	-0.0334501
3.75842	4.17559	-0.0213861		3.75842	4.18024	-0.00222325		3.75842	4.18473	0.0149667		3.75842	4.18279	-0.00126362		3.75842	4.17399	-0.015527		3.75842	4.18952	0.00957847		3.75842	4.18497	0.0342786		3.75842	4.18459	-0.00634789		3.75842	4.18327	7.15256e-05		3.75842	4.18242	-0.00395775		3.75842	4.20919	-0.0318646
3.76562	4.17709	-0.0198841		3.76562	4.17789	-0.00457168		3.76562	4.18271	0.0129402		3.76562	4.18293	-0.00111461		3.76562	4.17305	-0.0164688		3.76562	4.1891	0.00915527		3.76562	4.18813	0.0374377		3.76562	4.1858	-0.00513792		3.76562	4.18207	-0.00113249		3.76562	4.18336	-0.00302196		3.76562	4.2111	-0.0299513
3.77282	4.17874	-0.0182331		3.77282	4.17668	-0.00578761		3.77282	4.17987	0.010103		3.77282	4.18215	-0.00189543		3.77282	4.17235	-0.0171721		3.77282	4.18822	0.00827909		3.77282	4.18965	0.0389636		3.77282	4.18621	-0.00472665		3.77282	4.18016	-0.00303984		3.77282	4.18424	-0.00213981		3.77282	4.2133	-0.0277579
3.78002	4.18051	-0.0164568		3.78002	4.17674	-0.00572205		3.78002	4.17639	0.00662208		3.78002	4.1805	-0.00355244		3.78002	4.1719	-0.0176191		3.78002	4.18711	0.00716448		3.78002	4.18932	0.0386357		3.78002	4.18586	-0.00507832		3.78002	4.17795	-0.00525713		3.78002	4.1852	-0.00118017		3.78002	4.21578	-0.0252724
3.78722	4.18232	-0.0146508		3.78722	4.17804	-0.00442863		3.78722	4.17258	0.00280738		3.78722	4.17808	-0.00596643		3.78722	4.17172	-0.0177979		3.78722	4.18591	0.00597239		3.78722	4.18715	0.0364602		3.78722	4.18484	-0.00610352		3.78722	4.17589	-0.00731349		3.78722	4.18618	-0.000196695		3.78722	4.2186	-0.022459
3.79442	4.18405	-0.0129223		3.79442	4.18023	-0.00222921		3.79442	4.16885	-0.000917912		3.79442	4.17513	-0.00892282		3.79442	4.17179	-0.0177324		3.79442	4.18473	0.00479221		3.79442	4.18339	0.0327051		3.79442	4.18324	-0.00769496		3.79442	4.17446	-0.00873804		3.79442	4.18707	0.000685453		3.79442	4.22165	-0.0194013
3.80162	4.18562	-0.0113547		3.80162	4.18283	0.000369549		3.80162	4.16566	-0.00411272		3.80162	4.17195	-0.0120997		3.80162	4.17203	-0.017488		3.80162	4.18363	0.00368953		3.80162	4.17855	0.0278592		3.80162	4.18122	-0.00972152		3.80162	4.17407	-0.00913739		3.80162	4.1877	0.00132322		3.80162	4.22472	-0.0163376
3.80882	4.18695	-0.0100195		3.80882	4.18527	0.00280142		3.80882	4.16334	-0.00643134		3.80882	4.16893	-0.0151157		3.80882	4.17234	-0.0171781		3.80882	4.18271	0.00277162		3.80882	4.17322	0.0225306		3.80882	4.17893	-0.0120103		3.80882	4.17491	-0.00829697		3.80882	4.18798	0.0015974		3.80882	4.22745	-0.0136077
3.81602	4.18798	-0.00899434		3.81602	4.18703	0.00456572		3.81602	4.16209	-0.00767708		3.81602	4.16639	-0.0176549		3.81602	4.17258	-0.0169456		3.81602	4.18209	0.00215173		3.81602	4.16798	0.0172913		3.81602	4.17657	-0.0143707		3.81602	4.17699	-0.0062108		3.81602	4.18779	0.00140667		3.81602	4.22949	-0.0115633
3.82322	4.18865	-0.00832081		3.82322	4.18779	0.00532866		3.82322	4.16191	-0.00785589		3.82322	4.1644	-0.0196457		3.82322	4.17264	-0.01688		3.82322	4.18181	0.00187159		3.82322	4.16327	0.0125766		3.82322	4.1743	-0.0166416		3.82322	4.18009	-0.00311732		3.82322	4.18693	0.000554323		3.82322	4.23059	-0.0104606
3.83042	4.18898	-0.00798702		3.83042	4.18747	0.00500679		3.83042	4.16257	-0.00719428		3.83042	4.16282	-0.0212312		3.83042	4.17249	-0.017029		3.83042	4.18183	0.00188947		3.83042	4.15935	0.00866055		3.83042	4.17228	-0.0186622		3.83042	4.18378	0.000572205		3.83042	4.18529	-0.00109076		3.83042	4.23068	-0.0103772
3.83762	4.18906	-0.00790954		3.83762	4.18623	0.00376701		3.83762	4.16374	-0.00602603		3.83762	4.16141	-0.0226378		3.83762	4.17213	-0.0173926		3.83762	4.18202	0.0020802		3.83762	4.15637	0.00568032		3.83762	4.17069	-0.0202477		3.83762	4.18752	0.00431538		3.83762	4.18283	-0.00354648		3.83762	4.22978	-0.0112772
3.84482	4.189	-0.0079751		3.84482	4.18444	0.00197887		3.84482	4.16515	-0.00461936		3.84482	4.16003	-0.0240147		3.84482	4.1715	-0.0180244		3.84482	4.18224	0.00230074		3.84482	4.15431	0.003618		3.84482	4.16971	-0.0212312		3.84482	4.19077	0.00756979		3.84482	4.17981	-0.00656843		3.84482	4.22807	-0.0129819
3.85202	4.18894	-0.00802875		3.85202	4.18261	0.000149012		3.85202	4.16665	-0.00311732		3.85202	4.15865	-0.0254035		3.85202	4.17051	-0.0190139		3.85202	4.18236	0.00241399		3.85202	4.15305	0.00236034		3.85202	4.16936	-0.0215828		3.85202	4.19307	0.00987053		3.85202	4.17653	-0.00985265		3.85202	4.22582	-0.0152349
3.85922	4.18895	-0.00802278		3.85922	4.18124	-0.00122786		3.85922	4.16831	-0.00145435		3.85922	4.15733	-0.0267208		3.85922	4.16909	-0.0204325		3.85922	4.18217	0.00222921		3.85922	4.15238	0.00168681		3.85922	4.16954	-0.021404		3.85922	4.19409	0.0108898		3.85922	4.17326	-0.013119		3.85922	4.22332	-0.0177324
3.86642	4.18896	-0.00801086		3.86642	4.18069	-0.00177026		3.86642	4.17022	0.000447035		3.86642	4.1562	-0.0278473		3.86642	4.16728	-0.0222385		3.86642	4.18151	0.0015676		3.86642	4.15212	0.00143051		3.86642	4.17007	-0.0208735		3.86642	4.19365	0.0104487		3.86642	4.17019	-0.0161946		3.86642	4.22086	-0.0202
3.87362	4.18878	-0.00818968		3.87362	4.18117	-0.00129342		3.87362	4.17241	0.00264645		3.87362	4.15541	-0.02864		3.87362	4.16521	-0.0243127		3.87362	4.18019	0.000244379		3.87362	4.15217	0.00147819		3.87362	4.17079	-0.0201523		3.87362	4.19179	0.00858307		3.87362	4.16746	-0.0189185		3.87362	4.21864	-0.0224113
3.88082	4.18818	-0.00879168		3.88082	4.18261	0.000143051		3.88082	4.17491	0.00514388		3.88082	4.15512	-0.0289261		3.88082	4.16301	-0.0265062		3.88082	4.17817	-0.00177026		3.88082	4.15248	0.00178814		3.88082	4.17165	-0.019294		3.88082	4.18873	0.00553131		3.88082	4.16536	-0.0210166		3.88082	4.21672	-0.0243306
3.88802	4.18702	-0.00995398		3.88802	4.18468	0.00221133		3.88802	4.17761	0.00783801		3.88802	4.15548	-0.0285685		3.88802	4.16087	-0.028652		3.88802	4.1756	-0.00433922		3.88802	4.15303	0.00234246		3.88802	4.17262	-0.0183165		3.88802	4.18492	0.00171661		3.88802	4.16421	-0.0221729		3.88802	4.21501	-0.0260472
3.89522	4.18524	-0.0117302		3.89522	4.1869	0.00444055		3.89522	4.18037	0.0105977		3.89522	4.15656	-0.0274897		3.89522	4.15905	-0.0304759		3.89522	4.1728	-0.0071466		3.89522	4.15382	0.00312924		3.89522	4.1737	-0.0172436		3.89522	4.1808	-0.00240207		3.89522	4.16423	-0.0221491		3.89522	4.21329	-0.0277698
3.90242	4.18286	-0.0141144		3.90242	4.18878	0.00631809		3.90242	4.18295	0.0131786		3.90242	4.15833	-0.0257194		3.90242	4.15792	-0.0316024		3.90242	4.17014	-0.00980496		3.90242	4.15479	0.0041008		3.90242	4.17486	-0.0160754		3.90242	4.17681	-0.00639558		3.90242	4.16545	-0.0209272		3.90242	4.21141	-0.0296414
3.90963	4.17998	-0.0169933		3.90963	4.18992	0.00745654		3.90963	4.185	0.015229		3.90963	4.16065	-0.0234008		3.90963	4.15787	-0.0316501		3.90963	4.16799	-0.0119567		3.90963	4.15591	0.00522137		3.90963	4.17612	-0.0148177		3.90963	4.17324	-0.0099659		3.90963	4.16774	-0.0186443		3.90963	4.20936	-0.0316918
3.91683	4.1769	-0.0200689		3.91683	4.19008	0.00761747		3.91683	4.18622	0.0164509		3.91683	4.16331	-0.0207365		3.91683	4.15912	-0.0304043		3.91683	4.16661	-0.0133336		3.91683	4.15713	0.0064373		3.91683	4.17755	-0.0133932		3.91683	4.17034	-0.0128627		3.91683	4.17086	-0.015521		3.91683	4.20725	-0.0338018
3.92403	4.1741	-0.0228763		3.92403	4.18921	0.00674725		3.92403	4.1865	0.016731		3.92403	4.16611	-0.017935		3.92403	4.16163	-0.027889		3.92403	4.16607	-0.013876		3.92403	4.15832	0.0076294		3.92403	4.17916	-0.0117838		3.92403	4.16824	-0.0149667		3.92403	4.1746	-0.0117779		3.92403	4.20531	-0.0357449
3.93123	4.17202	-0.0249505		3.93123	4.18749	0.00503063		3.93123	4.18599	0.0162184		3.93123	4.16889	-0.0151634		3.93123	4.1652	-0.0243247		3.93123	4.16625	-0.0136912		3.93123	4.15931	0.00862479		3.93123	4.18092	-0.0100195		3.93123	4.16691	-0.0162899		3.93123	4.17866	-0.00772476		3.93123	4.20376	-0.0372946
3.93843	4.171	-0.0259757		3.93843	4.1853	0.00283122		3.93843	4.18506	0.0152946		3.93843	4.17148	-0.0125706		3.93843	4.16946	-0.020057		3.93843	4.16694	-0.0129998		3.93843	4.15995	0.00926256		3.93843	4.18277	-0.0081718		3.93843	4.16619	-0.0170112		3.93843	4.18261	-0.00377297		3.93843	4.20284	-0.0382125
3.94563	4.171	-0.0259697		3.94563	4.18312	0.000655651		3.94563	4.18417	0.0144064		3.94563	4.17379	-0.010258		3.94563	4.17406	-0.0154614		3.94563	4.16784	-0.0121057		3.94563	4.1602	0.00950694		3.94563	4.18455	-0.00638962		3.94563	4.16578	-0.0174224		3.94563	4.18602	-0.000363588		3.94563	4.20269	-0.0383675
3.95283	4.17185	-0.0251174		3.95283	4.18145	-0.00101328		3.95283	4.18366	0.0138938		3.95283	4.17569	-0.00835657		3.95283	4.1786	-0.0109255		3.95283	4.16862	-0.0113189		3.95283	4.16009	0.00940561		3.95283	4.18613	-0.00481009		3.95283	4.16538	-0.0178218		3.95283	4.18856	0.00218153		3.95283	4.20327	-0.0377893
3.96003	4.17323	-0.0237465		3.96003	4.18063	-0.00182986		3.96003	4.18373	0.0139654		3.96003	4.17707	-0.0069797		3.96003	4.18273	-0.00678897		3.96003	4.16909	-0.010854		3.96003	4.15971	0.00901818		3.96003	4.18739	-0.00354648		3.96003	4.16479	-0.0184119		3.96003	4.19015	0.00377297		3.96003	4.20437	-0.0366867
3.96723	4.17475	-0.0222206		3.96723	4.18082	-0.00163913		3.96723	4.18442	0.0146508		3.96723	4.17781	-0.00623465		3.96723	4.18624	-0.00327826		3.96723	4.16921	-0.0107348		3.96723	4.15902	0.00832677		3.96723	4.18825	-0.00269413		3.96723	4.16396	-0.0192404		3.96723	4.19091	0.00452995		3.96723	4.2056	-0.0354588
3.97443	4.17605	-0.0209212		3.97443	4.18197	-0.000494719		3.97443	4.18561	0.0158429		3.97443	4.17783	-0.00622272		3.97443	4.18906	-0.000464916		3.97443	4.16918	-0.0107586		3.97443	4.158	0.00730753		3.97443	4.18862	-0.00231862		3.97443	4.16285	-0.020355		3.97443	4.19104	0.00465512		3.97443	4.20645	-0.0346005
3.98163	4.1768	-0.0201702		3.98163	4.18379	0.00132918		3.98163	4.18706	0.0172913		3.98163	4.17709	-0.00695586		3.98163	4.19123	0.00171065		3.98163	4.16937	-0.0105739		3.98163	4.15675	0.00606179		3.98163	4.18845	-0.00249147		3.98163	4.16138	-0.0218213		3.98163	4.19071	0.0043273		3.98163	4.20644	-0.0346184
3.98883	4.17689	-0.0200808		3.98883	4.18587	0.00340343		3.98883	4.18845	0.0186861		3.98883	4.17569	-0.00836253		3.98883	4.19295	0.00343323		3.98883	4.17011	-0.00983477		3.98883	4.15544	0.00475049		3.98883	4.18761	-0.0033319		3.98883	4.15952	-0.0236869		3.98883	4.19005	0.00366569		3.98883	4.20526	-0.0357985
3.99603	4.1764	-0.0205696		3.99603	4.18773	0.00526309		3.99603	4.18957	0.0198066		3.99603	4.1738	-0.010252		3.99603	4.19439	0.0048697		3.99603	4.17159	-0.00835061		3.99603	4.15426	0.00357628		3.99603	4.18596	-0.00498295		3.99603	4.15727	-0.025934		3.99603	4.18912	0.00273585		3.99603	4.20291	-0.038147
4.00323	4.17559	-0.0213802		4.00323	4.1889	0.00643134		4.00323	4.19037	0.0205994		4.00323	4.17173	-0.0123203		4.00323	4.19569	0.00616908		4.00323	4.17379	-0.0061512		4.00323	4.15334	0.00264645		4.00323	4.18339	-0.00754595		4.00323	4.15477	-0.0284374		4.00323	4.18795	0.00157356		4.00323	4.19978	-0.0412703
4.01043	4.17472	-0.0222564		4.01043	4.18903	0.00656247		4.01043	4.19095	0.0211775		4.01043	4.16981	-0.0142396		4.01043	4.1969	0.00737906		4.01043	4.17656	-0.00337958		4.01043	4.15266	0.00197291		4.01043	4.17991	-0.0110269		4.01043	4.15217	-0.0310361		4.01043	4.18649	0.000107288		4.01043	4.19654	-0.0445187
4.01763	4.17396	-0.0230074		4.01763	4.18791	0.00544786		4.01763	4.19151	0.0217378		4.01763	4.16831	-0.0157356		4.01763	4.19797	0.00844598		4.01763	4.17958	-0.000363588		4.01763	4.1523	0.00160933		4.01763	4.17567	-0.0152707		4.01763	4.14961	-0.0335932		4.01763	4.18458	-0.00180006		4.01763	4.19398	-0.0470757
4.02483	4.1734	-0.0235736		4.02483	4.18553	0.00306964		4.02483	4.19225	0.0224769		4.02483	4.16744	-0.0166059		4.02483	4.19884	0.00932217		4.02483	4.18237	0.00243187		4.02483	4.15241	0.00171661		4.02483	4.17092	-0.0200152		4.02483	4.14724	-0.0359595		4.02483	4.18209	-0.00428557		4.02483	4.19285	-0.0482082
4.03203	4.17297	-0.0239968		4.03203	4.18207	-0.000393391		4.03203	4.19333	0.0235617		4.03203	4.16737	-0.0166833		4.03203	4.19953	0.0100076		4.03203	4.18437	0.00442863		4.03203	4.15316	0.00247359		4.03203	4.16607	-0.024873		4.03203	4.14529	-0.0379086		4.03203	4.17903	-0.00734925		4.03203	4.19372	-0.047332
4.03923	4.17254	-0.0244319		4.03923	4.1779	-0.00456572		4.03923	4.19478	0.0250161		4.03923	4.16821	-0.015837		4.03923	4.20014	0.0106156		4.03923	4.18506	0.00512004		4.03923	4.15463	0.00394583		4.03923	4.16157	-0.0293732		4.03923	4.14404	-0.0391662		4.03923	4.17554	-0.0108421		4.03923	4.19691	-0.0441492
4.04643	4.17185	-0.0251234		4.04643	4.17356	-0.00889897		4.04643	4.19649	0.0267267		4.04643	4.17002	-0.014025		4.04643	4.20086	0.0113368		4.04643	4.18419	0.00424385		4.04643	4.1567	0.00601411		4.04643	4.15792	-0.033021		4.04643	4.14376	-0.0394464		4.04643	4.17193	-0.0144482		4.04643	4.2023	-0.0387549
4.05363	4.17066	-0.0263155		4.05363	4.16969	-0.0127733		4.05363	4.19822	0.0284493		4.05363	4.17266	-0.0113845		4.05363	4.20182	0.0122964		4.05363	4.18178	0.00183582		4.05363	4.1591	0.00841618		4.05363	4.15553	-0.0354052		4.05363	4.14455	-0.0386536		4.05363	4.16858	-0.0178039		4.05363	4.20938	-0.0316739
4.06083	4.16882	-0.0281513		4.06083	4.16682	-0.0156462		4.06083	4.19968	0.0299156		4.06083	4.17583	-0.00821948		4.06083	4.20309	0.013572		4.06083	4.17811	-0.00182986		4.06083	4.16156	0.0108719		4.06083	4.15463	-0.0363052		4.06083	4.14634	-0.0368655		4.06083	4.16577	-0.0206113		4.06083	4.21724	-0.0238121
4.06803	4.16636	-0.030607		4.06803	4.16533	-0.0171304		4.06803	4.20074	0.0309765		4.06803	4.17917	-0.00487566		4.06803	4.2046	0.015074		4.06803	4.17355	-0.00638962		4.06803	4.16375	0.0130594		4.06803	4.15516	-0.0357747		4.06803	4.14898	-0.034225		4.06803	4.16375	-0.0226319		4.06803	4.22484	-0.0162125
4.07523	4.16344	-0.0335336		4.07523	4.16535	-0.0171125		4.07523	4.20138	0.0316143		4.07523	4.18245	-0.00159741		4.07523	4.20613	0.0166059		4.07523	4.16853	-0.0114083		4.07523	4.16532	0.0146329		4.07523	4.15686	-0.0340819		4.07523	4.1523	-0.030905		4.07523	4.16268	-0.0236988		4.07523	4.23131	-0.00974536
4.08243	4.1603	-0.0366688		4.08243	4.16677	-0.0156939		4.08243	4.20167	0.0319064		4.08243	4.18548	0.00143051		4.08243	4.2074	0.0178814		4.08243	4.1635	-0.0164449		4.08243	4.16596	0.0152707		4.08243	4.15934	-0.0315964		4.08243	4.15617	-0.0270367		4.08243	4.16262	-0.0237644		4.08243	4.23608	-0.00497699
4.08963	4.15727	-0.0397027		4.08963	4.16932	-0.0131488		4.08963	4.20172	0.031954		4.08963	4.18804	0.00399351		4.08963	4.20811	0.0185907		4.08963	4.15895	-0.0209928		4.08963	4.16546	0.01477		4.08963	4.16226	-0.0286818		4.08963	4.16036	-0.0228465		4.08963	4.16338	-0.0229955		4.08963	4.23886	-0.00219345
4.09683	4.15472	-0.0422537		4.09683	4.17258	-0.00988245		4.09683	4.20163	0.0318587		4.09683	4.18993	0.00587702		4.09683	4.20792	0.018394		4.09683	4.15529	-0.0246525		4.09683	4.16384	0.0131547		4.09683	4.16526	-0.0256777		4.09683	4.16465	-0.018549		4.09683	4.16464	-0.0217378		4.09683	4.23961	-0.00144243
4.10403	4.15301	-0.0439644		4.10403	4.1761	-0.00636578		4.10403	4.20144	0.0316739		4.10403	4.19099	0.00694394		4.10403	4.20657	0.0170469		4.10403	4.15278	-0.0271618		4.10403	4.16142	0.0107288		4.10403	4.16808	-0.0228643		4.10403	4.16886	-0.0143468		4.10403	4.16597	-0.0204146		4.10403	4.23848	-0.00257492
4.11123	4.15239	-0.0445843		4.11123	4.17937	-0.00309348		4.11123	4.20113	0.031358		4.11123	4.19129	0.00724196		4.11123	4.20402	0.0144958		4.11123	4.1515	-0.0284433		4.11123	4.15871	0.00801683		4.11123	4.17055	-0.0203907		4.11123	4.17281	-0.0103891		4.11123	4.167	-0.0193775		4.11123	4.23585	-0.00520945
4.11843	4.15292	-0.0440478		4.11843	4.18198	-0.000488758		4.11843	4.20049	0.0307262		4.11843	4.19103	0.0069797		4.11843	4.20049	0.0109673		4.11843	4.15141	-0.0285327		4.11843	4.15635	0.00566244		4.11843	4.17268	-0.0182629		4.11843	4.1764	-0.00680685		4.11843	4.16756	-0.0188231		4.11843	4.23223	-0.00882149
4.12563	4.15453	-0.0424445		4.12563	4.18365	0.00118613		4.12563	4.1992	0.0294328		4.12563	4.19044	0.00639558		4.12563	4.19643	0.00690818		4.12563	4.15247	-0.0274718		4.12563	4.15494	0.00424981		4.12563	4.17455	-0.0163913		4.12563	4.17938	-0.00382066		4.12563	4.16753	-0.018847		4.12563	4.22812	-0.0129402
4.13283	4.15698	-0.0399888		4.13283	4.1844	0.00193715		4.13283	4.19699	0.0272214		4.13283	4.18972	0.0056684		4.13283	4.19239	0.00287294		4.13283	4.15463	-0.0253141		4.13283	4.15483	0.00414252		4.13283	4.17615	-0.0147879		4.13283	4.18152	-0.00168085		4.13283	4.16691	-0.0194669		4.13283	4.22372	-0.017339
4.14003	4.16002	-0.0369489		4.14003	4.18442	0.00195503		4.14003	4.19379	0.0240266		4.14003	4.18894	0.00489354		4.14003	4.18887	-0.000649691		4.14003	4.15776	-0.0221789		4.14003	4.15611	0.00542402		4.14003	4.17734	-0.0136018		4.14003	4.18264	-0.000566244		4.14003	4.16586	-0.0205159		4.14003	4.21909	-0.0219643
4.14723	4.16334	-0.0336289		4.14723	4.18398	0.00151396		4.14723	4.18981	0.0200391		4.14723	4.18821	0.0041604		4.14723	4.1862	-0.00331998		4.14723	4.16163	-0.0183165		4.14723	4.1586	0.00790954		4.14723	4.17789	-0.0130534		4.14723	4.18273	-0.000476837		4.14723	4.16468	-0.0217021		4.14723	4.21429	-0.0267625
4.15443	4.16665	-0.0303209		4.15443	4.18333	0.000870228		4.15443	4.18533	0.0155628		4.15443	4.18762	0.00357032		4.15443	4.18454	-0.00498295		4.15443	4.16588	-0.0140667		4.15443	4.16182	0.0111341		4.15443	4.17766	-0.0132799		4.15443	4.18193	-0.00126958		4.15443	4.16372	-0.0226617		4.15443	4.20955	-0.0315011
4.16163	4.16971	-0.0272632		4.16163	4.1827	0.000232458		4.16163	4.18077	0.011003		4.16163	4.18725	0.00320077		4.16163	4.18383	-0.00568628		4.16163	4.17013	-0.00981092		4.16163	4.16512	0.0144303		4.16163	4.17665	-0.0142932		4.16163	4.18046	-0.00274777		4.16163	4.16325	-0.0231326		4.16163	4.20525	-0.0358045
4.16883	4.17238	-0.0245929		4.16883	4.18226	-0.000202656		4.16883	4.17657	0.00680685		4.16883	4.18708	0.00302792		4.16883	4.18388	-0.0056386		4.16883	4.17407	-0.00587702		4.16883	4.16777	0.0170827		4.16883	4.17495	-0.015986		4.16883	4.17854	-0.00466704		4.16883	4.16334	-0.0230432		4.16883	4.20178	-0.0392795
4.17603	4.1746	-0.0223756		4.17603	4.18215	-0.000315905		4.17603	4.17326	0.00349283		4.17603	4.18704	0.00299215		4.17603	4.18434	-0.0051856		4.17603	4.17745	-0.00249743		4.17603	4.16921	0.0185251		4.17603	4.17269	-0.0182509		4.17603	4.1764	-0.00680089		4.17603	4.16403	-0.0223458		4.17603	4.1994	-0.0416517
4.18323	4.17638	-0.0205934		4.18323	4.18243	-3.57628e-05		4.18323	4.17128	0.001508		4.18323	4.18708	0.00302792		4.18323	4.18475	-0.00477433		4.18323	4.18013	0.000190735		4.18323	4.16917	0.0184834		4.18323	4.17007	-0.0208676		4.18323	4.1743	-0.00890493		4.18323	4.16539	-0.0209928		4.18323	4.19827	-0.0427842
4.19043	4.17771	-0.0192583		4.19043	4.18304	0.000578165		4.19043	4.17084	0.00106692		4.19043	4.18722	0.00317097		4.19043	4.18476	-0.00475645		4.19043	4.18206	0.00212193		4.19043	4.16768	0.0169873		4.19043	4.16746	-0.0234783		4.19043	4.1724	-0.0108063		4.19043	4.16738	-0.018996		4.19043	4.19843	-0.0426233
4.19763	4.17855	-0.0184178		4.19763	4.18384	0.00137687		4.19763	4.17182	0.0020504		4.19763	4.18759	0.00354052		4.19763	4.18417	-0.00534654		4.19763	4.18322	0.00327826		4.19763	4.16497	0.0142813		4.19763	4.16533	-0.0256062		4.19763	4.1707	-0.0124991		4.19763	4.16986	-0.0165164		4.19763	4.19981	-0.0412405
4.20483	4.17879	-0.0181854		4.20483	4.18462	0.00215173		4.20483	4.17387	0.0041008		4.20483	4.18829	0.00424385		4.20483	4.18301	-0.00650883		4.20483	4.18366	0.00371337		4.20483	4.16149	0.0108063		4.20483	4.16405	-0.0268936		4.20483	4.16913	-0.0140727		4.20483	4.17249	-0.0138879		4.20483	4.20219	-0.0388622
4.21203	4.17827	-0.018698		4.21203	4.18516	0.00269413		4.21203	4.17646	0.0066936		4.21203	4.18935	0.00530481		4.21203	4.18154	-0.00798106		4.21203	4.18354	0.00360012		4.21203	4.15782	0.00712872		4.21203	4.16373	-0.0272095		4.21203	4.16751	-0.0156939		4.21203	4.17499	-0.0113904		4.21203	4.20514	-0.0359178
4.21923	4.17688	-0.0200868		4.21923	4.18528	0.0028193		4.21923	4.17906	0.00929236		4.21923	4.19067	0.00662208		4.21923	4.18014	-0.00938177		4.21923	4.18312	0.00317693		4.21923	4.15452	0.00383258		4.21923	4.16427	-0.0266731		4.21923	4.16579	-0.0174105		4.21923	4.17724	-0.00913739		4.21923	4.20813	-0.0329256
4.22643	4.17459	-0.0223815		4.22643	4.18491	0.00244975		4.22643	4.18116	0.0113964		4.22643	4.19206	0.00801086		4.22643	4.17914	-0.0103772		4.22643	4.18264	0.00269413		4.22643	4.15214	0.00144839		4.22643	4.16549	-0.0254512		4.22643	4.16409	-0.0191152		4.22643	4.17925	-0.00712872		4.22643	4.21071	-0.0303447
4.23363	4.17145	-0.0255167		4.23363	4.18404	0.00157356		4.23363	4.18237	0.0126004		4.23363	4.1933	0.00925064		4.23363	4.17884	-0.0106812		4.23363	4.1822	0.00225902		4.23363	4.15096	0.000268221		4.23363	4.16722	-0.0237226		4.23363	4.1626	-0.0205994		4.23363	4.18091	-0.00547171		4.23363	4.21267	-0.0283897
4.24083	4.16765	-0.0293255		4.24083	4.18271	0.00025034		4.24083	4.1824	0.0126302		4.24083	4.19418	0.0101328		4.24083	4.17935	-0.0101745		4.24083	4.18176	0.00181794		4.24083	4.15106	0.000375509		4.24083	4.16926	-0.0216842		4.24083	4.16158	-0.0216186		4.24083	4.18192	-0.00445843		4.24083	4.21404	-0.0270128
4.24803	4.16346	-0.0335157		4.24803	4.18106	-0.00140071		4.24803	4.18125	0.0114858		4.24803	4.19446	0.0104129		4.24803	4.18069	-0.00883341		4.24803	4.18112	0.00118017		4.24803	4.15241	0.00171661		4.24803	4.17133	-0.0196099		4.24803	4.16123	-0.0219703		4.24803	4.18198	-0.00440478		4.24803	4.215	-0.0260532
4.25523	4.1593	-0.0376761		4.25523	4.17926	-0.00320077		4.25523	4.17919	0.00941753		4.25523	4.19391	0.00986457		4.25523	4.18271	-0.00681281		4.25523	4.18013	0.000184774		4.25523	4.15484	0.00415444		4.25523	4.17313	-0.0178099		4.25523	4.16164	-0.021565		4.25523	4.18096	-0.00541806		4.25523	4.21578	-0.0252724
4.26243	4.15563	-0.0413418		4.26243	4.17755	-0.00491142		4.26243	4.17663	0.00686049		4.26243	4.19241	0.00836253		4.26243	4.18506	-0.00446439		4.26243	4.17867	-0.00126958		4.26243	4.15816	0.00747442		4.26243	4.17454	-0.0163972		4.26243	4.16279	-0.0204086		4.26243	4.179	-0.00737906		4.26243	4.21658	-0.0244737
4.26963	4.15289	-0.0440836		4.26963	4.17622	-0.00624061		4.26963	4.17403	0.00426173		4.26963	4.19003	0.00598431		4.26963	4.18726	-0.00226498		4.26963	4.17677	-0.00317693		4.26963	4.16206	0.0113666		4.26963	4.17563	-0.0153124		4.26963	4.16452	-0.0186861		4.26963	4.17625	-0.0101328		4.26963	4.21756	-0.0234962
4.27683	4.15137	-0.0455976		4.27683	4.17549	-0.00697374		4.27683	4.17178	0.00201464		4.27683	4.18704	0.00298619		4.27683	4.18888	-0.00064373		4.27683	4.17442	-0.00552535		4.27683	4.16612	0.0154316		4.27683	4.1765	-0.0144422		4.27683	4.16649	-0.0167131		4.27683	4.17283	-0.0135481		4.27683	4.21885	-0.0222087
4.28403	4.1512	-0.0457764		4.28403	4.17542	-0.00704527		4.28403	4.17014	0.000369549		4.28403	4.18389	-0.000160933		4.28403	4.18969	0.000166893		4.28403	4.17171	-0.00823736		4.28403	4.16994	0.0192523		4.28403	4.17719	-0.0137448		4.28403	4.16825	-0.0149488		4.28403	4.16889	-0.017488		4.28403	4.22047	-0.0205874
4.29123	4.15231	-0.0446618		4.29123	4.17585	-0.00661016		4.29123	4.16926	-0.000506639		4.29123	4.18104	-0.00301003		4.29123	4.1897	0.000178814		4.29123	4.16874	-0.0111997		4.29123	4.17318	0.0224948		4.29123	4.17759	-0.0133514		4.29123	4.1694	-0.0137985		4.29123	4.16475	-0.0216305		4.29123	4.22235	-0.0187099
4.29843	4.15449	-0.0424802		4.29843	4.17656	-0.00590086		4.29843	4.1692	-0.000572205		4.29843	4.17891	-0.00513792		4.29843	4.18906	-0.000458956		4.29843	4.16576	-0.0141799		4.29843	4.17556	0.024873		4.29843	4.17755	-0.0133932		4.29843	4.16968	-0.0135183		4.29843	4.161	-0.0253797		4.29843	4.22435	-0.0167072
4.30563	4.15733	-0.039643		4.30563	4.1773	-0.00516176		4.30563	4.16985	8.3447e-05		4.30563	4.17777	-0.00627637		4.30563	4.18802	-0.00150204		4.30563	4.16304	-0.0169039		4.30563	4.1769	0.0262141		4.30563	4.17696	-0.0139832		4.30563	4.16912	-0.0140846		4.30563	4.15826	-0.0281155		4.30563	4.22632	-0.0147343
4.31283	4.16024	-0.0367284		4.31283	4.17796	-0.00450015		4.31283	4.17103	0.00126362		4.31283	4.17773	-0.00632405		4.31283	4.18684	-0.00268221		4.31283	4.16086	-0.0190794		4.31283	4.17712	0.0264347		4.31283	4.17578	-0.0151575		4.31283	4.16791	-0.0152886		4.31283	4.15695	-0.0294328		4.31283	4.22814	-0.0129163
4.32003	4.16263	-0.0343382		4.32003	4.17854	-0.00392795		4.32003	4.17247	0.00270605		4.32003	4.17863	-0.00542402		4.32003	4.18581	-0.00371337		4.32003	4.15944	-0.020498		4.32003	4.17626	0.0255704		4.32003	4.17399	-0.0169456		4.32003	4.16644	-0.0167668		4.32003	4.15706	-0.0293195		4.32003	4.22969	-0.0113666
4.32723	4.16405	-0.0329256		4.32723	4.17904	-0.00342727		4.32723	4.1739	0.0041306		4.32723	4.18018	-0.00386834		4.32723	4.18517	-0.00435114		4.32723	4.15889	-0.0210524		4.32723	4.17447	0.0237823		4.32723	4.17159	-0.0193536		4.32723	4.16504	-0.0181675		4.32723	4.15839	-0.0279903		4.32723	4.23089	-0.0101686
4.33443	4.16428	-0.0326872		4.33443	4.17957	-0.00289679		4.33443	4.17507	0.00530481		4.33443	4.18197	-0.0020802		4.33443	4.185	-0.00451803		4.33443	4.15918	-0.0207663		4.33443	4.172	0.0213087		4.33443	4.16855	-0.0223875		4.33443	4.16402	-0.0191808		4.33443	4.16061	-0.0257671		4.33443	4.23166	-0.00939965
4.34163	4.1634	-0.0335753		4.34163	4.18031	-0.00215173		4.34163	4.17575	0.00597835		4.34163	4.18348	-0.000566244		4.34163	4.18516	-0.00436306		4.34163	4.16023	-0.0197172		4.34163	4.16903	0.0183463		4.34163	4.16499	-0.0259459		4.34163	4.16356	-0.0196397		4.34163	4.16343	-0.0229537		4.34163	4.23194	-0.00911951
4.34883	4.1616	-0.0353754		4.34883	4.18149	-0.000977516		4.34883	4.1757	0.00593662		4.34883	4.18425	0.000202656		4.34883	4.18535	-0.00416636		4.34883	4.16189	-0.0180542		4.34883	4.16577	0.0150859		4.34883	4.16114	-0.0298023		4.34883	4.1636	-0.019598		4.34883	4.16642	-0.0199616		4.34883	4.23174	-0.00931621
4.35603	4.15929	-0.0376821		4.35603	4.18326	0.000798702		4.35603	4.1748	0.00503063		4.35603	4.18398	-7.1526e-05		4.35603	4.18531	-0.00420809		4.35603	4.16403	-0.0159144		4.35603	4.16242	0.0117302		4.35603	4.15729	-0.0336528		4.35603	4.1639	-0.0193		4.35603	4.16914	-0.0172377		4.35603	4.23112	-0.00993609
4.36323	4.15704	-0.0399351		4.36323	4.18558	0.00311732		4.36323	4.17299	0.00321865		4.36323	4.18258	-0.00147224		4.36323	4.18488	-0.00463724		4.36323	4.16648	-0.0134587		4.36323	4.15921	0.00852346		4.36323	4.15382	-0.0371218		4.36323	4.16411	-0.0190914		4.36323	4.17122	-0.0151575		4.36323	4.23013	-0.0109255
4.37043	4.15544	-0.0415325		4.37043	4.18816	0.0056982		4.37043	4.17038	0.000607967		4.37043	4.18027	-0.00377894		4.37043	4.18409	-0.00543594		4.37043	4.16906	-0.0108838		4.37043	4.15643	0.00573993		4.37043	4.15109	-0.0398457		4.37043	4.16397	-0.0192344		4.37043	4.17254	-0.0138402		4.37043	4.22884	-0.012213
4.37763	4.15494	-0.0420332		4.37763	4.19056	0.00809431		4.37763	4.16717	-0.00259876		4.37763	4.17741	-0.00663996		4.37763	4.18299	-0.00653267		4.37763	4.17152	-0.00842214		4.37763	4.15428	0.00359416		4.37763	4.14939	-0.0415504		4.37763	4.16342	-0.0197828		4.37763	4.17327	-0.013113		4.37763	4.22727	-0.0137866
4.38483	4.15565	-0.0413179		4.38483	4.19238	0.00991225		4.38483	4.16372	-0.00604987		4.38483	4.17437	-0.00967979		4.38483	4.18168	-0.00783801		4.38483	4.17364	-0.00630021		4.38483	4.15295	0.00225902		4.38483	4.14886	-0.0420749		4.38483	4.16254	-0.0206649		4.38483	4.17382	-0.0125587		4.38483	4.22541	-0.0156462
4.39203	4.15732	-0.039649		4.39203	4.19335	0.0108898		4.39203	4.16048	-0.00929236		4.39203	4.17143	-0.0126183		4.39203	4.18026	-0.00926256		4.39203	4.17529	-0.00465512		4.39203	4.15252	0.00183582		4.39203	4.1496	-0.0413418		4.39203	4.16148	-0.0217199		4.39203	4.1746	-0.0117838		4.39203	4.22322	-0.0178397
4.39923	4.15949	-0.0374794		4.39923	4.1934	0.0109375		4.39923	4.15792	-0.0118434		4.39923	4.16881	-0.0152349		4.39923	4.17892	-0.0106037		4.39923	4.17639	-0.00355244		4.39923	4.15306	0.00237226		4.39923	4.15158	-0.0393629		4.39923	4.16045	-0.0227571		4.39923	4.17584	-0.0105441		4.39923	4.22062	-0.0204325
4.40643	4.16165	-0.0353217		4.40643	4.19258	0.0101149		4.40643	4.15646	-0.0133097		4.40643	4.16673	-0.0173211		4.40643	4.17788	-0.0116408		4.40643	4.17693	-0.003016		4.40643	4.1545	0.0038147		4.40643	4.15469	-0.0362456		4.40643	4.15964	-0.0235677		4.40643	4.17762	-0.00876188		4.40643	4.21758	-0.0234723
4.41363	4.16331	-0.0336587		4.41363	4.19105	0.00858307		4.41363	4.1562	-0.013566		4.41363	4.16537	-0.0186801		4.41363	4.17737	-0.0121474		4.41363	4.17688	-0.00306368		4.41363	4.1567	0.00601411		4.41363	4.15866	-0.0322819		4.41363	4.15925	-0.0239551		4.41363	4.17985	-0.00653267		4.41363	4.21415	-0.0269055
4.42083	4.1641	-0.032872		4.42083	4.18904	0.00658035		4.42083	4.15699	-0.0127792		4.42083	4.16484	-0.0192106		4.42083	4.17753	-0.0119865		4.42083	4.17627	-0.00367761		4.42083	4.1594	0.00870824		4.42083	4.163	-0.0279367		4.42083	4.15939	-0.0238121		4.42083	4.18238	-0.00399947		4.42083	4.2105	-0.0305593
4.42803	4.16374	-0.0332296		4.42803	4.1869	0.00444055		4.42803	4.15851	-0.0112593		4.42803	4.16516	-0.0188887		4.42803	4.17841	-0.0111103		4.42803	4.17513	-0.00481606		4.42803	4.16224	0.0115514		4.42803	4.16722	-0.0237226		4.42803	4.15995	-0.0232577		4.42803	4.18497	-0.00140667		4.42803	4.20685	-0.0342071
4.43523	4.16223	-0.0347435		4.43523	4.18489	0.00242591		4.43523	4.16039	-0.00938177		4.43523	4.16631	-0.0177443		4.43523	4.17998	-0.00953674		4.43523	4.17358	-0.00636578		4.43523	4.16489	0.0142038		4.43523	4.17085	-0.0200868		4.43523	4.16059	-0.022614		4.43523	4.18733	0.000947714		4.43523	4.20349	-0.0375628
4.44243	4.15979	-0.0371814		4.44243	4.1831	0.000631809		4.44243	4.16228	-0.0074923		4.44243	4.16825	-0.0157952		4.44243	4.18221	-0.00731349		4.44243	4.17173	-0.00821352		4.44243	4.16705	0.0163615		4.44243	4.17364	-0.0172973		4.44243	4.16098	-0.0222206		4.44243	4.18918	0.00280142		4.44243	4.20067	-0.0403821
4.44963	4.15691	-0.0400603		4.44963	4.18143	-0.00103712		4.44963	4.16388	-0.00588894		4.44963	4.17098	-0.0130653		4.44963	4.18493	-0.00458956		4.44963	4.16974	-0.0102043		4.44963	4.16853	0.0178397		4.44963	4.17548	-0.0154555		4.44963	4.16095	-0.0222504		4.44963	4.19035	0.00396967		4.44963	4.19861	-0.0424445
4.45683	4.15413	-0.0428438		4.45683	4.17969	-0.00277758		4.45683	4.16501	-0.00476241		4.45683	4.17441	-0.00964403		4.45683	4.18784	-0.00168085		4.45683	4.16771	-0.0122309		4.45683	4.16926	0.0185668		4.45683	4.17636	-0.0145793		4.45683	4.16053	-0.0226736		4.45683	4.19083	0.00445247		4.45683	4.19747	-0.0435829
4.46403	4.1519	-0.0450671		4.46403	4.17771	-0.00475049		4.46403	4.1656	-0.00417232		4.46403	4.17829	-0.00575781		4.46403	4.1905	0.000983477		4.46403	4.16571	-0.0142276		4.46403	4.16929	0.0185966		4.46403	4.17637	-0.0145674		4.46403	4.15987	-0.0233293		4.46403	4.19069	0.00430942		4.46403	4.19732	-0.0437379
4.47123	4.15055	-0.0464261		4.47123	4.17548	-0.0069797		4.47123	4.16583	-0.00393987		4.47123	4.18227	-0.00178218		4.47123	4.19248	0.00296235		4.47123	4.16372	-0.0162184		4.47123	4.16873	0.0180364		4.47123	4.17572	-0.015223		4.47123	4.15918	-0.0240266		4.47123	4.19004	0.00365973		4.47123	4.19809	-0.042963
4.47843	4.15018	-0.0467956		4.47843	4.17309	-0.00937581		4.47843	4.16604	-0.00372529		4.47843	4.18591	0.00186562		4.47843	4.19342	0.00389814		4.47843	4.16173	-0.0182152		4.47843	4.16775	0.0170588		4.47843	4.17465	-0.0162899		4.47843	4.15866	-0.0245392		4.47843	4.18894	0.002563		4.47843	4.19962	-0.0414371
4.48563	4.15079	-0.0461817		4.48563	4.17069	-0.0117719		4.48563	4.16657	-0.00319481		4.48563	4.18881	0.00475645		4.48563	4.19315	0.00362992		4.48563	4.15974	-0.020206		4.48563	4.16663	0.0159442		4.48563	4.17342	-0.0175238		4.48563	4.15853	-0.0246704		4.48563	4.18745	0.00106692		4.48563	4.20171	-0.039345
4.49283	4.15226	-0.0447154		4.49283	4.16858	-0.0138819		4.49283	4.16758	-0.00218749		4.49283	4.19064	0.00658631		4.49283	4.19168	0.00216365		4.49283	4.15788	-0.0220597		4.49283	4.16566	0.0149667		4.49283	4.17215	-0.0187933		4.49283	4.15888	-0.0243247		4.49283	4.18556	-0.000816584		4.49283	4.20418	-0.0368774
4.50003	4.15435	-0.0426233		4.50003	4.16708	-0.015384		4.50003	4.16905	-0.000715256		4.50003	4.19126	0.00721216		4.50003	4.18918	-0.000339746		4.50003	4.15633	-0.0236094		4.50003	4.16508	0.0143945		4.50003	4.17084	-0.0201046		4.50003	4.15965	-0.0235498		4.50003	4.18332	-0.00305772		4.50003	4.20684	-0.0342131
4.50723	4.15676	-0.0402093		4.50723	4.16647	-0.0159919		4.50723	4.17082	0.00104904		4.50723	4.19066	0.00661015		4.50723	4.18595	-0.00357032		4.50723	4.15523	-0.0247121		4.50723	4.16508	0.0143945		4.50723	4.16939	-0.021553		4.50723	4.16059	-0.022608		4.50723	4.18074	-0.0056386		4.50723	4.20945	-0.0316024
4.51443	4.15917	-0.0378013		4.51443	4.1669	-0.0155628		4.51443	4.17271	0.00294447		4.51443	4.18894	0.00489354		4.51443	4.18236	-0.00715852		4.51443	4.15471	-0.0252306		4.51443	4.16577	0.01508		4.51443	4.16775	-0.0231862		4.51443	4.16138	-0.0218213		4.51443	4.1779	-0.00847578		4.51443	4.21168	-0.0293791
4.52163	4.16128	-0.0356913		4.52163	4.16831	-0.0141501		4.52163	4.17461	0.00484586		4.52163	4.18631	0.00226498		4.52163	4.17879	-0.0107288		4.52163	4.15491	-0.025034		4.52163	4.16723	0.0165463		4.52163	4.16598	-0.0249624		4.52163	4.1617	-0.0214994		4.52163	4.17501	-0.0113726		4.52163	4.21324	-0.0278175
4.52883	4.16292	-0.0340521		4.52883	4.17054	-0.0119209		4.52883	4.17644	0.00667572		4.52883	4.18316	-0.00089407		4.52883	4.17556	-0.0139654		4.52883	4.15604	-0.0239074		4.52883	4.16956	0.0188708		4.52883	4.1642	-0.0267386		4.52883	4.16136	-0.0218391		4.52883	4.17235	-0.0140309		4.52883	4.21394	-0.0271201
4.53603	4.16405	-0.0329196		4.53603	4.17335	-0.00911355		4.53603	4.17816	0.00839233		4.53603	4.17991	-0.00414252		4.53603	4.17289	-0.0166357		4.53603	4.15823	-0.021714		4.53603	4.17272	0.0220299		4.53603	4.16262	-0.0283182		4.53603	4.1603	-0.0229001		4.53603	4.17022	-0.0161648		4.53603	4.21373	-0.0273287
4.54323	4.16476	-0.0322163		4.54323	4.17646	-0.00600219		4.54323	4.17975	0.00997782		4.54323	4.17706	-0.00698566		4.54323	4.17082	-0.018698		4.54323	4.1615	-0.0184417		4.54323	4.17647	0.025779		4.54323	4.16147	-0.0294745		4.54323	4.15861	-0.0245929		4.54323	4.16889	-0.017494		4.54323	4.21271	-0.028342
4.55043	4.16512	-0.0318468		4.55043	4.17949	-0.00297427		4.55043	4.18119	0.0114202		4.55043	4.17498	-0.00907183		4.55043	4.16932	-0.020206		4.55043	4.16568	-0.0142634		4.55043	4.18044	0.0297487		4.55043	4.16099	-0.0299513		4.55043	4.15654	-0.0266612		4.55043	4.16854	-0.0178397		4.55043	4.21112	-0.0299394
4.55763	4.16525	-0.0317216		4.55763	4.18208	-0.00038743		4.55763	4.1825	0.0127316		4.55763	4.1738	-0.010246		4.55763	4.16822	-0.0213027		4.55763	4.17042	-0.00952482		4.55763	4.18421	0.0335217		4.55763	4.16139	-0.029546		4.55763	4.15441	-0.028795		4.55763	4.16923	-0.0171483		4.55763	4.20921	-0.0318408
4.56483	4.16516	-0.031811		4.56483	4.1839	0.00143647		4.56483	4.18367	0.0139058		4.56483	4.17359	-0.0104606		4.56483	4.16741	-0.0221074		4.56483	4.1753	-0.0046432		4.56483	4.18736	0.0366747		4.56483	4.16276	-0.0281811		4.56483	4.15253	-0.0306726		4.56483	4.17091	-0.0154674		4.56483	4.20735	-0.0337064
4.57203	4.16484	-0.0321269		4.57203	4.18481	0.00234246		4.57203	4.1847	0.014931		4.57203	4.1743	-0.00974536		4.57203	4.16681	-0.0227153		4.57203	4.17991	-2.98023e-05		4.57203	4.1895	0.0388086		4.57203	4.16495	-0.0259876		4.57203	4.15111	-0.0320971		4.57203	4.17336	-0.0130236		4.57203	4.20582	-0.0352323
4.57923	4.16427	-0.0327051		4.57923	4.18475	0.00228882		4.57923	4.18549	0.0157237		4.57923	4.17578	-0.00827313		4.57923	4.16635	-0.0231683		4.57923	4.18378	0.00383258		4.57923	4.19018	0.0394881		4.57923	4.1676	-0.0233412		4.57923	4.15024	-0.0329614		4.57923	4.17616	-0.0102162		4.57923	4.2048	-0.0362515
4.58643	4.16335	-0.033623		4.58643	4.18376	0.00129342		4.58643	4.18594	0.0161767		4.58643	4.17773	-0.00632405		4.58643	4.16603	-0.0234902		4.58643	4.18644	0.00649691		4.58643	4.18912	0.0384331		4.58643	4.17025	-0.0206888		4.58643	4.14991	-0.0332892		4.58643	4.17887	-0.00751019		4.58643	4.20433	-0.0367284
4.59363	4.16195	-0.0350177		4.59363	4.18193	-0.000530481		4.59363	4.18594	0.0161707		4.59363	4.17971	-0.00433922		4.59363	4.16587	-0.0236511		4.59363	4.18761	0.00767112		4.59363	4.18631	0.0356197		4.59363	4.17251	-0.0184298		4.59363	4.1501	-0.0330985		4.59363	4.18106	-0.00532269		4.59363	4.20429	-0.0367701
4.60083	4.16005	-0.0369191		4.60083	4.17952	-0.00294447		4.60083	4.18547	0.0156999		4.60083	4.18137	-0.00268221		4.60083	4.16587	-0.0236511		4.60083	4.1872	0.00725985		4.60083	4.18205	0.031364		4.60083	4.17412	-0.0168204		4.60083	4.15075	-0.0324547		4.60083	4.18248	-0.00389814		4.60083	4.2045	-0.0365555
4.60803	4.15772	-0.0392556		4.60803	4.17687	-0.00559092		4.60803	4.18466	0.0148892		4.60803	4.18252	-0.00153184		4.60803	4.16602	-0.0234962		4.60803	4.18537	0.00542402		4.60803	4.17693	0.0262439		4.60803	4.1749	-0.0160396		4.60803	4.1518	-0.0313997		4.60803	4.18304	-0.00334382		4.60803	4.20482	-0.0362396
4.61523	4.15521	-0.041765		4.61523	4.17439	-0.00807643		4.61523	4.18372	0.0139534		4.61523	4.18318	-0.000870228		4.61523	4.16632	-0.0232041		4.61523	4.18249	0.00255108		4.61523	4.17163	0.0209391		4.61523	4.17476	-0.0161827		4.61523	4.15325	-0.0299513		4.61523	4.18268	-0.00369549		4.61523	4.20516	-0.0358999
4.62243	4.15284	-0.0441313		4.62243	4.17243	-0.0100374		4.62243	4.18285	0.0130773		4.62243	4.18347	-0.000578165		4.62243	4.16672	-0.0228047		4.62243	4.17908	-0.000858307		4.62243	4.16681	0.0161231		4.62243	4.1737	-0.0172377		4.62243	4.15512	-0.0280857		4.62243	4.18147	-0.00490546		4.62243	4.20551	-0.0355422
4.62963	4.151	-0.0459671		4.62963	4.17128	-0.0111878		4.62963	4.18206	0.0122905		4.62963	4.18357	-0.000482798		4.62963	4.16727	-0.0222504		4.62963	4.1757	-0.00424385		4.62963	4.1631	0.0124156		4.62963	4.17194	-0.018996		4.62963	4.1574	-0.0258029		4.62963	4.17959	-0.00678897		4.62963	4.20598	-0.0350773
4.63683	4.15007	-0.0468969		4.63683	4.1711	-0.0113606		4.63683	4.18127	0.0114977		4.63683	4.18369	-0.000357628		4.63683	4.16803	-0.0214875		4.63683	4.17291	-0.00703335		4.63683	4.16096	0.0102758		4.63683	4.16984	-0.0211		4.63683	4.16003	-0.0231743		4.63683	4.17736	-0.00902414		4.63683	4.20666	-0.0343978
4.64403	4.15032	-0.0466526		4.64403	4.17192	-0.0105441		4.64403	4.18031	0.0105441		4.64403	4.18413	7.7486e-05		4.64403	4.16908	-0.0204384		4.64403	4.17117	-0.00876784		4.64403	4.16057	0.00987649		4.64403	4.16785	-0.0230908		4.64403	4.16285	-0.020355		4.64403	4.17512	-0.0112593		4.64403	4.20761	-0.0334501
4.65123	4.15183	-0.0451446		4.65123	4.17356	-0.00889897		4.65123	4.17908	0.00931621		4.65123	4.18511	0.00106096		4.65123	4.17043	-0.0190914		4.65123	4.17067	-0.00927448		4.65123	4.16175	0.0110626		4.65123	4.16629	-0.0246525		4.65123	4.16567	-0.0175297		4.65123	4.17312	-0.0132561		4.65123	4.20877	-0.0322878
4.65843	4.15438	-0.0425875		4.65843	4.17576	-0.00669956		4.65843	4.17754	0.00777245		4.65843	4.18661	0.002563		4.65843	4.17206	-0.0174582		4.65843	4.17135	-0.00859499		4.65843	4.16406	0.0133693		4.65843	4.16535	-0.0255942		4.65843	4.16831	-0.0148892		4.65843	4.17144	-0.0149429		4.65843	4.21003	-0.0310242
4.66563	4.15758	-0.0393867		4.66563	4.17824	-0.00422001		4.66563	4.17567	0.00590682		4.66563	4.18832	0.00427365		4.66563	4.17397	-0.0155509		4.66563	4.17293	-0.00700951		4.66563	4.1669	0.0162065		4.66563	4.16511	-0.0258267		4.66563	4.17054	-0.01266		4.66563	4.17012	-0.0162601		4.66563	4.21129	-0.0297606
4.67283	4.16092	-0.0360489		4.67283	4.18076	-0.00170469		4.67283	4.17353	0.00376105		4.67283	4.18979	0.00573993		4.67283	4.17613	-0.0133872		4.67283	4.17506	-0.00488758		4.67283	4.16966	0.0189722		4.67283	4.16566	-0.0252843		4.67283	4.17215	-0.0110567		4.67283	4.16929	-0.0170887		4.67283	4.21247	-0.0285804
4.68003	4.16395	-0.033021		4.68003	4.18303	0.000566244		4.68003	4.17122	0.00144839		4.68003	4.19064	0.00658631		4.68003	4.1785	-0.0110209		4.68003	4.1773	-0.00264645		4.68003	4.17188	0.0211954		4.68003	4.16699	-0.0239491		4.68003	4.17303	-0.0101745		4.68003	4.16909	-0.0172913		4.68003	4.21352	-0.0275373
4.68723	4.16628	-0.0306904		4.68723	4.18471	0.0022471		4.68723	4.16887	-0.00090003		4.68723	4.19067	0.00661611		4.68723	4.1809	-0.00862479		4.68723	4.17925	-0.000691414		4.68723	4.1733	0.022608		4.68723	4.16898	-0.0219643		4.68723	4.17331	-0.00988841		4.68723	4.16951	-0.0168741		4.68723	4.21433	-0.0267267
4.69443	4.16763	-0.0293434		4.69443	4.18549	0.00302196		4.69443	4.16663	-0.0031352		4.69443	4.1898	0.00575185		4.69443	4.18309	-0.00643134		4.69443	4.18054	0.000602007		4.69443	4.17383	0.0231385		4.69443	4.17128	-0.0196576		4.69443	4.17327	-0.00993609		4.69443	4.17035	-0.0160277		4.69443	4.21488	-0.0261724
4.70163	4.16784	-0.0291288		4.70163	4.18528	0.00281334		4.70163	4.16461	-0.00516176		4.70163	4.18802	0.00396967		4.70163	4.18482	-0.00469685		4.70163	4.18094	0.00100136		4.70163	4.17362	0.0229359		4.70163	4.17345	-0.017488		4.70163	4.17317	-0.0100374		4.70163	4.17138	-0.0149965		4.70163	4.21522	-0.0258327
4.70883	4.16704	-0.0299275		4.70883	4.18424	0.00177622		4.70883	4.16283	-0.00693798		4.70883	4.18538	0.00133514		4.70883	4.18593	-0.0035882		4.70883	4.18047	0.000530481		4.70883	4.17298	0.0222921		4.70883	4.17503	-0.0159085		4.70883	4.17315	-0.0100553		4.70883	4.17243	-0.0139475		4.70883	4.2154	-0.0256538
4.71603	4.16563	-0.0313401		4.71603	4.18264	0.000172853		4.71603	4.16133	-0.00843406		4.71603	4.18212	-0.00193119		4.71603	4.1863	-0.00321865		4.71603	4.17938	-0.000566244		4.71603	4.17227	0.0215769		4.71603	4.17573	-0.0152111		4.71603	4.17325	-0.00994802		4.71603	4.1734	-0.0129819		4.71603	4.21534	-0.0257134
4.72323	4.16413	-0.0328422		4.72323	4.1807	-0.0017643		4.72323	4.1601	-0.00966787		4.72323	4.17858	-0.00547171		4.72323	4.18583	-0.00369549		4.72323	4.17802	-0.00192523		4.72323	4.17182	0.0211358		4.72323	4.17537	-0.0155687		4.72323	4.17348	-0.00972748		4.72323	4.17422	-0.0121593		4.72323	4.21478	-0.0262737
4.73043	4.16301	-0.0339568		4.73043	4.17857	-0.00389218		4.73043	4.15911	-0.0106573		4.73043	4.17515	-0.00889897		4.73043	4.1844	-0.00512004		4.73043	4.17672	-0.00321865		4.73043	4.17193	0.0212431		4.73043	4.174	-0.0169396		4.73043	4.17377	-0.00942945		4.73043	4.17478	-0.0115991		4.73043	4.21347	-0.027585
4.73763	4.1626	-0.034374		4.73763	4.17649	-0.00597835		4.73763	4.15842	-0.0113487		4.73763	4.17206	-0.0119865		4.73763	4.18196	-0.00756383		4.73763	4.17573	-0.00421405		4.73763	4.17271	0.022018		4.73763	4.17179	-0.019151		4.73763	4.17405	-0.00915527		4.73763	4.17505	-0.0113308		4.73763	4.21132	-0.0297368
4.74483	4.163	-0.0339746		4.74483	4.17477	-0.007689		4.74483	4.15819	-0.0115812		4.74483	4.1694	-0.0146508		4.74483	4.17858	-0.0109434		4.74483	4.17523	-0.00471473		4.74483	4.17411	0.0234246		4.74483	4.16908	-0.021863		4.74483	4.17415	-0.00904799		4.74483	4.17511	-0.0112712		4.74483	4.20852	-0.0325382
4.75203	4.16425	-0.0327229		4.75203	4.17377	-0.00869036		4.75203	4.15865	-0.0111222		4.75203	4.16721	-0.0168443		4.75203	4.17449	-0.0150323		4.75203	4.17535	-0.00459552		4.75203	4.17596	0.0252724		4.75203	4.16639	-0.0245512		4.75203	4.17404	-0.00916719		4.75203	4.17516	-0.0112236		4.75203	4.20542	-0.0356376
4.75923	4.16628	-0.0306904		4.75923	4.17359	-0.00886917		4.75923	4.15996	-0.00981093		4.75923	4.16558	-0.0184715		4.75923	4.1701	-0.0194252		4.75923	4.17606	-0.00388622		4.75923	4.17792	0.0272274		4.75923	4.16424	-0.0266969		4.75923	4.17374	-0.00945926		4.75923	4.17537	-0.011009		4.75923	4.20234	-0.0387132
4.76643	4.16891	-0.0280619		4.76643	4.17413	-0.00833869		4.76643	4.16211	-0.0076592		4.76643	4.1647	-0.0193477		4.76643	4.16583	-0.0236869		4.76643	4.17711	-0.00283718		4.76643	4.1796	0.0289142		4.76643	4.16303	-0.0279069		4.76643	4.17345	-0.00975132		4.76643	4.17584	-0.0105441		4.76643	4.19963	-0.0414252
4.77363	4.17179	-0.025177		4.77363	4.17512	-0.00734329		4.77363	4.16492	-0.00485182		4.77363	4.16467	-0.0193775		4.77363	4.16215	-0.0273705		4.77363	4.17811	-0.00182986		4.77363	4.18057	0.0298798		4.77363	4.16292	-0.0280201		4.77363	4.17331	-0.00988841		4.77363	4.17653	-0.00985265		4.77363	4.19769	-0.0433683
4.78083	4.17449	-0.0224769		4.78083	4.17639	-0.00607371		4.78083	4.16819	-0.00157356		4.78083	4.16547	-0.0185788		4.78083	4.15949	-0.0300288		4.78083	4.17874	-0.00119805		4.78083	4.18042	0.0297308		4.78083	4.16381	-0.0271261		4.78083	4.17339	-0.00981688		4.78083	4.17734	-0.00903606		4.78083	4.1969	-0.0441551
4.78803	4.17663	-0.0203431		4.78803	4.17774	-0.00472069		4.78803	4.1718	0.00203252		4.78803	4.16691	-0.0171363		4.78803	4.15822	-0.0313044		4.78803	4.17884	-0.00110269		4.78803	4.17892	0.0282347		4.78803	4.16548	-0.0254631		4.78803	4.17368	-0.00952482		4.78803	4.17812	-0.0082612		4.78803	4.19749	-0.043565
4.79523	4.17796	-0.0190079		4.79523	4.17895	-0.00351667		4.79523	4.1756	0.00583529		4.79523	4.16874	-0.0153065		4.79523	4.15856	-0.0309587		4.79523	4.17835	-0.0015974		4.79523	4.17613	0.0254393		4.79523	4.1676	-0.0233352		4.79523	4.1742	-0.0090003		4.79523	4.17863	-0.0077486		4.79523	4.19929	-0.041765
4.80243	4.17843	-0.018537		4.80243	4.17967	-0.00279546		4.80243	4.17946	0.00969171		4.80243	4.17064	-0.0134051		4.80243	4.16054	-0.0289857		4.80243	4.17721	-0.00273585		4.80243	4.17238	0.0216961		4.80243	4.1699	-0.0210404		4.80243	4.17491	-0.00829101		4.80243	4.17867	-0.00771284		4.80243	4.20178	-0.0392735
4.80963	4.17802	-0.0189483		4.80963	4.17961	-0.00285506		4.80963	4.18316	0.0133872		4.80963	4.17223	-0.0118196		4.80963	4.16387	-0.0256479		4.80963	4.17541	-0.00452995		4.80963	4.16826	0.0175715		4.80963	4.1721	-0.0188351		4.80963	4.17573	-0.00746846		4.80963	4.17805	-0.00833273		4.80963	4.20437	-0.0366807
4.81683	4.17672	-0.0202477		4.81683	4.17867	-0.00379682		4.81683	4.18653	0.0167668		4.81683	4.17311	-0.0109375		4.81683	4.16812	-0.0213981		4.81683	4.17306	-0.00688434		4.81683	4.16445	0.0137627		4.81683	4.17412	-0.0168204		4.81683	4.17657	-0.00662804		4.81683	4.17675	-0.00963211		4.81683	4.20669	-0.0343621
4.82403	4.17455	-0.0224173		4.82403	4.17694	-0.00552535		4.82403	4.18947	0.0197053		4.82403	4.17304	-0.011009		4.82403	4.17272	-0.0168025		4.82403	4.17042	-0.00952482		4.82403	4.16163	0.0109375		4.82403	4.17599	-0.0149488		4.82403	4.17739	-0.00581741		4.82403	4.17488	-0.0114977		4.82403	4.20864	-0.032419
4.83123	4.17162	-0.0253499		4.83123	4.17458	-0.00787973		4.83123	4.19189	0.0221193		4.83123	4.17198	-0.0120699		4.83123	4.17716	-0.012362		4.83123	4.16777	-0.0121713		4.83123	4.16037	0.00968575		4.83123	4.17783	-0.013113		4.83123	4.17821	-0.00499487		4.83123	4.1727	-0.0136793		4.83123	4.21025	-0.0308037
4.83843	4.16813	-0.0288367		4.83843	4.17185	-0.0106156		4.83843	4.19363	0.0238597		4.83843	4.17014	-0.0139058		4.83843	4.18106	-0.00846386		4.83843	4.16534	-0.0146031		4.83843	4.16107	0.0103831		4.83843	4.17979	-0.0111461		4.83843	4.17913	-0.004071		4.83843	4.17051	-0.0158727		4.83843	4.21163	-0.0294209
4.84563	4.16434	-0.0326276		4.84563	4.16898	-0.0134885		4.84563	4.19454	0.0247717		4.84563	4.16784	-0.0162065		4.84563	4.18419	-0.00533462		4.84563	4.16326	-0.0166833		4.84563	4.16379	0.0131011		4.84563	4.18193	-0.00900626		4.84563	4.1802	-0.00300407		4.84563	4.16861	-0.0177741		4.84563	4.21283	-0.0282288
4.85283	4.16051	-0.0364602		4.85283	4.16629	-0.0161707		4.85283	4.19449	0.024724		4.85283	4.16548	-0.0185668		4.85283	4.18645	-0.00306964		4.85283	4.16169	-0.0182509		4.85283	4.16816	0.0174761		4.85283	4.18414	-0.00679493		4.85283	4.18138	-0.0018239		4.85283	4.16721	-0.0191689		4.85283	4.21391	-0.0271499
4.86003	4.15688	-0.040096		4.86003	4.16415	-0.0183165		4.86003	4.19356	0.0237942		4.86003	4.16349	-0.0205636		4.86003	4.18789	-0.00162721		4.86003	4.16092	-0.0190198		4.86003	4.17349	0.0228047		4.86003	4.18613	-0.00481009		4.86003	4.18258	-0.000625849		4.86003	4.16641	-0.0199735		4.86003	4.21494	-0.0261188
4.86723	4.15367	-0.0433028		4.86723	4.16277	-0.0196934		4.86723	4.19203	0.0222623		4.86723	4.16219	-0.021857		4.86723	4.18862	-0.000905991		4.86723	4.16131	-0.0186324		4.86723	4.17891	0.0282228		4.86723	4.18746	-0.00348091		4.86723	4.18364	0.000441074		4.86723	4.16618	-0.0202		4.86723	4.2159	-0.0251591
4.87443	4.15117	-0.0458062		4.87443	4.16225	-0.0202119		4.87443	4.1903	0.0205338		4.87443	4.16176	-0.0222921		4.87443	4.18878	-0.000745058		4.87443	4.16309	-0.0168502		4.87443	4.18365	0.0329614		4.87443	4.18767	-0.00326633		4.87443	4.18445	0.00124574		4.87443	4.16644	-0.0199437		4.87443	4.21652	-0.0245333
4.88163	4.14959	-0.0473857		4.88163	4.16257	-0.019896		4.88163	4.18878	0.0190139		4.88163	4.1621	-0.0219464		4.88163	4.18853	-0.000995398		4.88163	4.16633	-0.0136077		4.88163	4.18717	0.036484		4.88163	4.18652	-0.00442266		4.88163	4.18484	0.00163913		4.88163	4.16695	-0.0194311		4.88163	4.21643	-0.0246286
4.88883	4.14906	-0.0479162		4.88883	4.16366	-0.0188053		4.88883	4.18773	0.0179648		4.88883	4.163	-0.0210464		4.88883	4.18797	-0.00154972		4.88883	4.17082	-0.00911951		4.88883	4.18921	0.0385165		4.88883	4.18393	-0.00700951		4.88883	4.18474	0.0015378		4.88883	4.16746	-0.0189245		4.88883	4.21519	-0.0258625
4.89603	4.14956	-0.0474155		4.89603	4.16541	-0.0170529		4.89603	4.18731	0.0175416		4.89603	4.16424	-0.0198126		4.89603	4.18722	-0.00230074		4.89603	4.17609	-0.00385046		4.89603	4.18971	0.0390172		4.89603	4.1801	-0.0108361		4.89603	4.1841	0.00089407		4.89603	4.16763	-0.0187516		4.89603	4.21267	-0.0283837
4.90323	4.15094	-0.0460267		4.90323	4.16763	-0.0148296		4.90323	4.1876	0.0178277		4.90323	4.16561	-0.0184417		4.90323	4.18639	-0.00312924		4.90323	4.18153	0.00158548		4.90323	4.18884	0.038147		4.90323	4.17539	-0.0155449		4.90323	4.18291	-0.000292063		4.90323	4.16731	-0.0190675		4.90323	4.20901	-0.0320435
4.91043	4.153	-0.0439763		4.91043	4.17005	-0.0124097		4.91043	4.18858	0.0188112		4.91043	4.16697	-0.0170827		4.91043	4.18563	-0.00388622		4.91043	4.18644	0.00649691		4.91043	4.18695	0.0362635		4.91043	4.17033	-0.0206053		4.91043	4.1812	-0.00200272		4.91043	4.16654	-0.0198424		4.91043	4.20467	-0.0363827
4.91763	4.15552	-0.0414491		4.91763	4.17236	-0.010103		4.91763	4.19011	0.0203431		4.91763	4.16816	-0.0158846		4.91763	4.1851	-0.00442266		4.91763	4.19016	0.0102222		4.91763	4.18453	0.0338376		4.91763	4.16559	-0.0253499		4.91763	4.17904	-0.0041604		4.91763	4.16548	-0.0208974		4.91763	4.20029	-0.0407696
4.92483	4.15835	-0.0386178		4.92483	4.17431	-0.00815392		4.92483	4.19186	0.0220895		4.92483	4.16908	-0.0149667		4.92483	4.18488	-0.00463724		4.92483	4.19222	0.0122786		4.92483	4.18194	0.0312507		4.92483	4.16185	-0.029093		4.92483	4.17654	-0.0066638		4.92483	4.16437	-0.022012		4.92483	4.19658	-0.044471
4.93203	4.16136	-0.0356078		4.93203	4.1757	-0.00676513		4.93203	4.19345	0.0236869		4.93203	4.16968	-0.0143647		4.93203	4.18499	-0.00453591		4.93203	4.19236	0.0124156		4.93203	4.17947	0.0287771		4.93203	4.15961	-0.0313342		4.93203	4.17387	-0.00932813		4.93203	4.16339	-0.0229895		4.93203	4.19425	-0.0468016
4.93923	4.16447	-0.0325024		4.93923	4.17638	-0.00608563		4.93923	4.19461	0.0248432		4.93923	4.16997	-0.0140786		4.93923	4.1853	-0.00422597		4.93923	4.19065	0.010705		4.93923	4.17725	0.0265658		4.93923	4.15905	-0.0318885		4.93923	4.17129	-0.011915		4.93923	4.16273	-0.0236511		4.93923	4.19381	-0.0472486
4.94643	4.16765	-0.0293195		4.94643	4.17624	-0.00622272		4.94643	4.19522	0.0254512		4.94643	4.16997	-0.0140786		4.94643	4.18565	-0.0038743		4.94643	4.18752	0.00758171		4.94643	4.1755	0.0248075		4.94643	4.16012	-0.0308216		4.94643	4.16908	-0.0141203		4.94643	4.16256	-0.023824		4.94643	4.19547	-0.0455856
4.95363	4.17086	-0.0261128		4.95363	4.17528	-0.00718236		4.95363	4.19526	0.0254869		4.95363	4.16965	-0.0144005		4.95363	4.18584	-0.00367761		4.95363	4.18368	0.00373721		4.95363	4.17439	0.0237048		4.95363	4.16254	-0.0283957		4.95363	4.1676	-0.0156045		4.95363	4.16299	-0.0233889		4.95363	4.1991	-0.0419557
4.96083	4.174	-0.0229716		4.96083	4.17361	-0.00885725		4.96083	4.19469	0.0249267		4.96083	4.16901	-0.0150442		4.96083	4.18572	-0.00379682		4.96083	4.17987	-7.15256e-05		4.96083	4.17416	0.0234723		4.96083	4.16603	-0.0249088		4.96083	4.16713	-0.0160694		4.96083	4.16403	-0.0223517		4.96083	4.20427	-0.036788
4.96803	4.17691	-0.020057		4.96803	4.17143	-0.0110388		4.96803	4.19348	0.0237167		4.96803	4.16815	-0.0159025		4.96803	4.18516	-0.00436306		4.96803	4.1767	-0.00324249		4.96803	4.17485	0.0241637		4.96803	4.1702	-0.0207365		4.96803	4.1678	-0.0154078		4.96803	4.16551	-0.0208676		4.96803	4.21028	-0.0307739
4.97523	4.17936	-0.0176132		4.97523	4.16906	-0.0133991		4.97523	4.19165	0.0218868		4.97523	4.16731	-0.0167429		4.97523	4.18409	-0.00542998		4.97523	4.17447	-0.00547171		4.97523	4.17642	0.0257313		4.97523	4.17468	-0.0162601		4.97523	4.16947	-0.0137329		4.97523	4.16723	-0.019151		4.97523	4.2163	-0.0247598
4.98243	4.1811	-0.0158668		4.98243	4.16692	-0.0155389		4.98243	4.18937	0.019604		4.98243	4.16674	-0.0173092		4.98243	4.18258	-0.00693798		4.98243	4.17321	-0.00673532		4.98243	4.17871	0.0280201		4.98243	4.17909	-0.0118494		4.98243	4.17185	-0.0113487		4.98243	4.1689	-0.017482		4.98243	4.22151	-0.0195444
4.98963	4.18195	-0.0150263		4.98963	4.16541	-0.0170529		4.98963	4.18691	0.0171423		4.98963	4.16663	-0.0174224		4.98963	4.18077	-0.00874996		4.98963	4.17286	-0.00708699		4.98963	4.18144	0.03075		4.98963	4.18314	-0.00780225		4.98963	4.17447	-0.00873208		4.98963	4.17027	-0.0161111		4.98963	4.22532	-0.0157356
4.99683	4.18181	-0.0151634		4.99683	4.16486	-0.0176013		4.99683	4.18451	0.0147402		4.99683	4.16707	-0.0169814		4.99683	4.17884	-0.0106812		4.99683	4.17327	-0.00666976		4.99683	4.1842	0.0335157		4.99683	4.1866	-0.00433922		4.99683	4.17677	-0.0064373		4.99683	4.17116	-0.015223		4.99683	4.22741	-0.0136435
5.00403	4.18076	-0.0162125		5.00403	4.16549	-0.0169694		5.00403	4.18231	0.0125468		5.00403	4.16805	-0.0159979		5.00403	4.17696	-0.0125647		5.00403	4.17422	-0.00572205		5.00403	4.18643	0.0357389		5.00403	4.18932	-0.00162125		5.00403	4.17818	-0.00501871		5.00403	4.17148	-0.0148952		5.00403	4.22778	-0.013274
5.01123	4.17904	-0.0179291		5.01123	4.16728	-0.0151813		5.01123	4.18038	0.0106096		5.01123	4.16952	-0.0145257		5.01123	4.17522	-0.0143051		5.01123	4.17532	-0.00462532		5.01123	4.18757	0.0368774		5.01123	4.1912	0.0002563		5.01123	4.17828	-0.00492334		5.01123	4.1713	-0.01508		5.01123	4.22665	-0.0144005
5.01843	4.17702	-0.0199497		5.01843	4.17008	-0.0123799		5.01843	4.17872	0.00895262		5.01843	4.17136	-0.0126898		5.01843	4.17368	-0.015837		5.01843	4.17613	-0.0038147		5.01843	4.18724	0.0365555		5.01843	4.19219	0.00124574		5.01843	4.17682	-0.00638366		5.01843	4.17073	-0.0156522		5.01843	4.22436	-0.0166953
5.02563	4.17508	-0.0218868		5.02563	4.17363	-0.00883341		5.02563	4.1773	0.00752807		5.02563	4.17332	-0.0107288		5.02563	4.17241	-0.0171065		5.02563	4.17627	-0.00367165		5.02563	4.18546	0.0347734		5.02563	4.1922	0.00126362		5.02563	4.17385	-0.00935793		5.02563	4.16992	-0.0164628		5.02563	4.22128	-0.0197768
5.03283	4.17352	-0.0234485		5.03283	4.17758	-0.00488162		5.03283	4.17596	0.00619292		5.03283	4.17512	-0.00892878		5.03283	4.17151	-0.0180066		5.03283	4.17554	-0.00439882		5.03283	4.18252	0.0318289		5.03283	4.19117	0.000232458		5.03283	4.16967	-0.0135362		5.03283	4.16904	-0.017339		5.03283	4.21779	-0.0232637
5.04003	4.17249	-0.0244796		5.04003	4.18147	-0.000995398		5.04003	4.17449	0.00472665		5.04003	4.17655	-0.00749826		5.04003	4.1711	-0.0184238		5.04003	4.17387	-0.00606775		5.04003	4.17889	0.0282049		5.04003	4.18901	-0.00193119		5.04003	4.16474	-0.0184655		5.04003	4.16829	-0.01809		5.04003	4.21425	-0.0268102
5.04723	4.17199	-0.0249803		5.04723	4.18481	0.00234842		5.04723	4.17268	0.00290871		5.04723	4.17751	-0.00653863		5.04723	4.17122	-0.0183046		5.04723	4.17123	-0.00870824		5.04723	4.17514	0.0244498		5.04723	4.18581	-0.00513196		5.04723	4.15958	-0.0236273		5.04723	4.16787	-0.0185132		5.04723	4.21093	-0.0301301
5.05443	4.17192	-0.0250518		5.05443	4.18722	0.00475645		5.05443	4.17047	0.000703335		5.05443	4.17804	-0.00600815		5.05443	4.17189	-0.0176311		5.05443	4.16768	-0.0122607		5.05443	4.17171	0.0210226		5.05443	4.18183	-0.00910759		5.05443	4.15463	-0.0285685		5.05443	4.16792	-0.0184596		5.05443	4.20806	-0.0329971
5.06163	4.17202	-0.0249565		5.06163	4.1885	0.00603199		5.06163	4.16809	-0.00168085		5.06163	4.17826	-0.00578761		5.06163	4.17311	-0.0164092		5.06163	4.16345	-0.0164926		5.06163	4.16894	0.0182509		5.06163	4.17743	-0.0135064		5.06163	4.15035	-0.0328541		5.06163	4.16846	-0.0179172		5.06163	4.20582	-0.0352383
5.06883	4.17199	-0.0249863		5.06883	4.18869	0.00622272		5.06883	4.16591	-0.00386238		5.06883	4.17833	-0.00572205		5.06883	4.17491	-0.0146091		5.06883	4.15903	-0.0209153		5.06883	4.16697	0.016278		5.06883	4.17293	-0.0180066		5.06883	4.14707	-0.0361323		5.06883	4.1694	-0.0169814		5.06883	4.20429	-0.0367641
5.07603	4.17148	-0.0254869		5.07603	4.18797	0.00550747		5.07603	4.16433	-0.00543594		5.07603	4.17842	-0.00563264		5.07603	4.17728	-0.0122368		5.07603	4.15505	-0.0248969		5.07603	4.1657	0.0150144		5.07603	4.16864	-0.0223041		5.07603	4.14513	-0.0380695		5.07603	4.17058	-0.0158012		5.07603	4.20353	-0.0375271
5.08323	4.17031	-0.0266612		5.08323	4.18658	0.00411868		5.08323	4.1636	-0.00616312		5.08323	4.1787	-0.00534654		5.08323	4.18013	-0.00938773		5.08323	4.15215	-0.0277936		5.08323	4.16483	0.0141442		5.08323	4.16484	-0.0260949		5.08323	4.14475	-0.0384569		5.08323	4.1719	-0.014478		5.08323	4.20356	-0.0374973
5.09043	4.1684	-0.0285685		5.09043	4.18476	0.00230074		5.09043	4.16383	-0.00594258		5.09043	4.17928	-0.00477433		5.09043	4.18325	-0.00627041		5.09043	4.15071	-0.0292361		5.09043	4.16398	0.0132918		5.09043	4.16195	-0.0289917		5.09043	4.14597	-0.0372291		5.09043	4.17326	-0.013119		5.09043	4.20436	-0.0366926
5.09763	4.16589	-0.0310779		5.09763	4.18276	0.000292063		5.09763	4.16495	-0.00481606		5.09763	4.18013	-0.00392199		5.09763	4.18634	-0.00317693		5.09763	4.15078	-0.0291586		5.09763	4.16287	0.0121772		5.09763	4.16027	-0.0306726		5.09763	4.14873	-0.0344694		5.09763	4.17449	-0.0118852		5.09763	4.20589	-0.0351608
5.10483	4.16298	-0.0339925		5.10483	4.18074	-0.00172257		5.10483	4.1668	-0.00296831		5.10483	4.18113	-0.00292063		5.10483	4.18918	-0.000339746		5.10483	4.15216	-0.0277817		5.10483	4.16145	0.0107586		5.10483	4.15995	-0.0309944		5.10483	4.15286	-0.0303388		5.10483	4.17539	-0.0109911		5.10483	4.20795	-0.0331044
5.11203	4.15989	-0.037086		5.11203	4.17877	-0.00368953		5.11203	4.16909	-0.000679493		5.11203	4.18206	-0.0019908		5.11203	4.19161	0.00208616		5.11203	4.15441	-0.0255346		5.11203	4.15992	0.00923276		5.11203	4.16092	-0.0300229		5.11203	4.15815	-0.0250578		5.11203	4.17581	-0.0105739		5.11203	4.21015	-0.030905
5.11923	4.15682	-0.0401497		5.11923	4.17682	-0.00564456		5.11923	4.17142	0.00165105		5.11923	4.18265	-0.00139475		5.11923	4.1935	0.00398159		5.11923	4.15704	-0.0229061		5.11923	4.15862	0.00792742		5.11923	4.163	-0.0279427		5.11923	4.16426	-0.0189424		5.11923	4.17577	-0.0106096		5.11923	4.21206	-0.0289977
5.12643	4.15404	-0.0429273		5.12643	4.1748	-0.00766516		5.12643	4.17346	0.00368953		5.12643	4.18262	-0.00143051		5.12643	4.19474	0.00521541		5.12643	4.15956	-0.0203848		5.12643	4.15786	0.00717044		5.12643	4.166	-0.0249445		5.12643	4.17076	-0.0124395		5.12643	4.17545	-0.0109315		5.12643	4.21339	-0.0276625
5.13363	4.15187	-0.0451028		5.13363	4.17276	-0.00970364		5.13363	4.17506	0.00529289		5.13363	4.18174	-0.00231266		5.13363	4.19521	0.00568628		5.13363	4.16158	-0.0183642		5.13363	4.15785	0.00716448		5.13363	4.16966	-0.0212789		5.13363	4.17714	-0.00606179		5.13363	4.17505	-0.0113308		5.13363	4.21408	-0.0269771
5.14083	4.15061	-0.0463665		5.14083	4.17088	-0.0115812		5.14083	4.17636	0.00659227		5.14083	4.1799	-0.00414848		5.14083	4.19492	0.00540018		5.14083	4.16291	-0.017029		5.14083	4.15865	0.00795722		5.14083	4.1737	-0.0172377		5.14083	4.18292	-0.000280142		5.14083	4.17473	-0.0116467		5.14083	4.21421	-0.0268459
5.14803	4.15043	-0.0465393		5.14803	4.16941	-0.0130534		5.14803	4.17763	0.00786185		5.14803	4.1772	-0.00684857		5.14803	4.19405	0.00452399		5.14803	4.16367	-0.0162721		5.14803	4.16008	0.00939369		5.14803	4.17773	-0.0132143		5.14803	4.18769	0.00448823		5.14803	4.17463	-0.0117481		5.14803	4.21385	-0.0272036
5.15523	4.15136	-0.0456095		5.15523	4.16862	-0.0138402		5.15523	4.17908	0.00931621		5.15523	4.17392	-0.0101268		5.15523	4.19285	0.0033319		5.15523	4.16423	-0.0157118		5.15523	4.16192	0.0112295		5.15523	4.1814	-0.00953674		5.15523	4.19107	0.00786781		5.15523	4.17492	-0.011456		5.15523	4.21298	-0.0280738
5.16243	4.15335	-0.0436246		5.16243	4.16871	-0.0137568		5.16243	4.18074	0.0109732		5.16243	4.1704	-0.0136495		5.16243	4.19155	0.00203252		5.16243	4.16504	-0.0149012		5.16243	4.16383	0.0131369		5.16243	4.18458	-0.00635982		5.16243	4.19272	0.0095129		5.16243	4.17576	-0.0106215		5.16243	4.21154	-0.0295103
5.16963	4.15629	-0.0406861		5.16963	4.16974	-0.0127196		5.16963	4.18246	0.0126958		5.16963	4.16698	-0.0170648		5.16963	4.19018	0.000661612		5.16963	4.16647	-0.0134706		5.16963	4.16554	0.0148475		5.16963	4.18726	-0.00368357		5.16963	4.19241	0.00920892		5.16963	4.17713	-0.00925064		5.16963	4.20967	-0.0313878
5.17683	4.16005	-0.0369251		5.17683	4.17169	-0.0107765		5.17683	4.18407	0.0142992		5.17683	4.164	-0.020051		5.17683	4.1886	-0.000917912		5.17683	4.16858	-0.0113666		5.17683	4.16681	0.0161231		5.17683	4.18947	-0.00146627		5.17683	4.19015	0.0069499		5.17683	4.1788	-0.00758171		5.17683	4.20758	-0.033474
5.18403	4.16431	-0.0326633		5.18403	4.17432	-0.00814795		5.18403	4.1854	0.0156343		5.18403	4.16172	-0.0223339		5.18403	4.18661	-0.00291467		5.18403	4.17121	-0.00873208		5.18403	4.1675	0.0168145		5.18403	4.19124	0.000303984		5.18403	4.18619	0.00298619		5.18403	4.18032	-0.00605583		5.18403	4.20549	-0.0355661
5.19123	4.16863	-0.028342		5.19123	4.17727	-0.00519753		5.19123	4.18634	0.0165701		5.19123	4.16035	-0.0236988		5.19123	4.18404	-0.00547767		5.19123	4.17416	-0.00578165		5.19123	4.16754	0.0168502		5.19123	4.19258	0.00163913		5.19123	4.18094	-0.00225902		5.19123	4.1813	-0.00507832		5.19123	4.20344	-0.0376105
5.19843	4.17256	-0.0244141		5.19843	4.18008	-0.00238419		5.19843	4.18671	0.0169456		5.19843	4.16001	-0.0240386		5.19843	4.18087	-0.00865459		5.19843	4.17727	-0.00267625		5.19843	4.16698	0.0162899		5.19843	4.19354	0.00259876		5.19843	4.17497	-0.0082314		5.19843	4.18148	-0.0048995		5.19843	4.2014	-0.039655
5.20563	4.17576	-0.0212133		5.20563	4.18239	-7.7486e-05		5.20563	4.18642	0.0166476		5.20563	4.16067	-0.0233769		5.20563	4.17714	-0.0123858		5.20563	4.18041	0.000470877		5.20563	4.16595	0.0152648		5.20563	4.19426	0.00331998		5.20563	4.1689	-0.0143051		5.20563	4.18077	-0.00561476		5.20563	4.19942	-0.0416338
5.21283	4.17811	-0.0188649		5.21283	4.18398	0.00151992		5.21283	4.18557	0.0158012		5.21283	4.16217	-0.0218749		5.21283	4.17303	-0.0164926		5.21283	4.18346	0.00351667		5.21283	4.16459	0.0139058		5.21283	4.19481	0.00386834		5.21283	4.16347	-0.0197351		5.21283	4.17922	-0.00715852		5.21283	4.19779	-0.043267
5.22003	4.17958	-0.0173926		5.22003	4.18485	0.00238419		5.22003	4.18454	0.01477		5.22003	4.1643	-0.019753		5.22003	4.16887	-0.020647		5.22003	4.18619	0.00624657		5.22003	4.16294	0.0122488		5.22003	4.19518	0.00423789		5.22003	4.15936	-0.0238419		5.22003	4.17699	-0.00938773		5.22003	4.19685	-0.0442088
5.22723	4.1802	-0.0167727		5.22723	4.18512	0.00265241		5.22723	4.18378	0.0140131		5.22723	4.16682	-0.0172317		5.22723	4.16519	-0.0243306		5.22723	4.18841	0.00846386		5.22723	4.16099	0.0103056		5.22723	4.19525	0.00430942		5.22723	4.15703	-0.0261724		5.22723	4.17433	-0.0120461		5.22723	4.19676	-0.0442982
5.23443	4.18003	-0.0169456		5.23443	4.18489	0.00242591		5.23443	4.18365	0.0138819		5.23443	4.16953	-0.0145197		5.23443	4.16257	-0.0269473		5.23443	4.18999	0.0100493		5.23443	4.15885	0.00816584		5.23443	4.19494	0.00399947		5.23443	4.15647	-0.0267327		5.23443	4.17172	-0.0146627		5.23443	4.19741	-0.0436425
5.24163	4.17919	-0.0177801		5.24163	4.1843	0.00183582		5.24163	4.18424	0.014472		5.24163	4.17227	-0.0117779		5.24163	4.16153	-0.0279903		5.24163	4.1909	0.0109553		5.24163	4.15676	0.00606775		5.24163	4.19424	0.00329614		5.24163	4.15734	-0.0258625		5.24163	4.16967	-0.0167072		5.24163	4.19855	-0.0425041
5.24883	4.17793	-0.0190377		5.24883	4.18347	0.00100136		5.24883	4.18547	0.0157058		5.24883	4.17489	-0.00915527		5.24883	4.1623	-0.0272214		5.24883	4.19096	0.0110149		5.24883	4.15499	0.0042975		5.24883	4.19313	0.00219345		5.24883	4.1591	-0.0241041		5.24883	4.16862	-0.0177562		5.24883	4.19997	-0.0410855
5.25603	4.17649	-0.0204861		5.25603	4.18253	6.55651e-05		5.25603	4.18723	0.0174582		5.25603	4.1772	-0.00684857		5.25603	4.16479	-0.02473		5.25603	4.18993	0.00998378		5.25603	4.15378	0.00309348		5.25603	4.19168	0.000739098		5.25603	4.16117	-0.0220358		5.25603	4.1688	-0.0175774		5.25603	4.20154	-0.0395119
5.26323	4.17501	-0.0219584		5.26323	4.18156	-0.00090003		5.26323	4.18929	0.0195205		5.26323	4.17904	-0.00500679		5.26323	4.16865	-0.0208735		5.26323	4.18759	0.00764728		5.26323	4.15324	0.00255108		5.26323	4.18991	-0.0010252		5.26323	4.163	-0.020206		5.26323	4.17016	-0.0162184		5.26323	4.20313	-0.0379205
5.27043	4.17357	-0.0234008		5.27043	4.18053	-0.00193715		5.27043	4.19134	0.0215769		5.27043	4.18028	-0.00376701		5.27043	4.17337	-0.0161469		5.27043	4.18397	0.00402927		5.27043	4.15335	0.00266433		5.27043	4.18794	-0.00299811		5.27043	4.16412	-0.0190794		5.27043	4.17252	-0.013864		5.27043	4.20453	-0.0365257
5.27763	4.17215	-0.0248194		5.27763	4.17928	-0.00318289		5.27763	4.19295	0.0231862		5.27763	4.18094	-0.00311136		5.27763	4.17844	-0.0110805		5.27763	4.17941	-0.000530481		5.27763	4.15405	0.0033617		5.27763	4.18589	-0.00504851		5.27763	4.16429	-0.0189126		5.27763	4.17556	-0.0108182		5.27763	4.20547	-0.0355899
5.28483	4.17077	-0.0262022		5.28483	4.17768	-0.00478625		5.28483	4.19371	0.0239432		5.28483	4.18112	-0.00293255		5.28483	4.1833	-0.00622272		5.28483	4.17447	-0.00547171		5.28483	4.15522	0.00452995		5.28483	4.18383	-0.00710487		5.28483	4.16357	-0.0196338		5.28483	4.17897	-0.00740886		5.28483	4.20581	-0.0352502
5.29203	4.16949	-0.0274777		5.29203	4.17569	-0.00677109		5.29203	4.19341	0.0236392		5.29203	4.18097	-0.0030756		5.29203	4.18745	-0.00206828		5.29203	4.16976	-0.0101805		5.29203	4.1567	0.00600815		5.29203	4.18177	-0.00917315		5.29203	4.16231	-0.0208914		5.29203	4.18236	-0.00402331		5.29203	4.20559	-0.0354648
5.29923	4.16844	-0.0285327		5.29923	4.17339	-0.00907183		5.29923	4.19209	0.0223219		5.29923	4.18063	-0.00341535		5.29923	4.19059	0.00107288		5.29923	4.16585	-0.0140965		5.29923	4.15827	0.00758171		5.29923	4.1796	-0.0113428		5.29923	4.16099	-0.0222147		5.29923	4.18532	-0.001055		5.29923	4.20501	-0.0360429
5.30643	4.16767	-0.0293016		5.30643	4.17091	-0.0115514		5.30643	4.18991	0.0201464		5.30643	4.18018	-0.0038743		5.30643	4.1926	0.0030756		5.30643	4.16318	-0.0167668		5.30643	4.15977	0.00907779		5.30643	4.17727	-0.0136673		5.30643	4.16003	-0.0231743		5.30643	4.18761	0.00122786		5.30643	4.20424	-0.0368178
5.31363	4.16719	-0.0297785		5.31363	4.16842	-0.0140429		5.31363	4.1871	0.017333		5.31363	4.17965	-0.00439882		5.31363	4.1935	0.00398159		5.31363	4.16204	-0.0178993		5.31363	4.16113	0.0104368		5.31363	4.17482	-0.0161171		5.31363	4.15974	-0.0234604		5.31363	4.18904	0.00266433		5.31363	4.20333	-0.0377238
5.32083	4.16699	-0.0299811		5.32083	4.16616	-0.0163078		5.32083	4.18388	0.0141144		5.32083	4.1792	-0.00485182		5.32083	4.19339	0.00386834		5.32083	4.16247	-0.0174701		5.32083	4.16248	0.0117898		5.32083	4.17233	-0.0186145		5.32083	4.1603	-0.0229061		5.32083	4.18962	0.00324249		5.32083	4.20226	-0.0387967
5.32803	4.16703	-0.0299454		5.32803	4.16442	-0.0180423		5.32803	4.18056	0.0107944		5.32803	4.17895	-0.00510216		5.32803	4.19237	0.0028491		5.32803	4.1642	-0.0157416		5.32803	4.16402	0.0133336		5.32803	4.16991	-0.0210345		5.32803	4.16174	-0.0214636		5.32803	4.18939	0.00301003		5.32803	4.20099	-0.0400662
5.33523	4.16725	-0.0297189		5.33523	4.16353	-0.0189304		5.33523	4.17749	0.0077188		5.33523	4.17902	-0.00503063		5.33523	4.19062	0.00109673		5.33523	4.16672	-0.0132263		5.33523	4.16586	0.0151753		5.33523	4.16774	-0.0232041		5.33523	4.16401	-0.0191927		5.33523	4.1885	0.00212193		5.33523	4.19959	-0.041461
5.34243	4.16761	-0.0293612		5.34243	4.16371	-0.0187576		5.34243	4.17497	0.00520349		5.34243	4.17947	-0.00457764		5.34243	4.18832	-0.00120401		5.34243	4.16936	-0.0105798		5.34243	4.16795	0.0172615		5.34243	4.16609	-0.0248492		5.34243	4.16696	-0.0162423		5.34243	4.18715	0.00077486		5.34243	4.19818	-0.0428736
5.34963	4.168	-0.0289738		5.34963	4.16498	-0.017482		5.34963	4.17318	0.00341535		5.34963	4.18032	-0.00373125		5.34963	4.18571	-0.0038147		5.34963	4.17146	-0.00848174		5.34963	4.17008	0.0193954		5.34963	4.16535	-0.0255942		5.34963	4.17039	-0.012809		5.34963	4.18555	-0.000828505		5.34963	4.19683	-0.0442207
5.35683	4.16828	-0.0286937		5.35683	4.16719	-0.0152707		5.35683	4.17212	0.00234842		5.35683	4.18157	-0.00247955		5.35683	4.18295	-0.00657439		5.35683	4.17246	-0.00748634		5.35683	4.17204	0.0213504		5.35683	4.16583	-0.0251055		5.35683	4.17409	-0.00911355		5.35683	4.1838	-0.00258088		5.35683	4.19558	-0.0454724
5.36403	4.16839	-0.0285804		5.36403	4.17003	-0.0124335		5.36403	4.17166	0.00189543		5.36403	4.18325	-0.000798702		5.36403	4.18012	-0.00939965		5.36403	4.17205	-0.00789165		5.36403	4.17368	0.0229955		5.36403	4.16767	-0.0232697		5.36403	4.17784	-0.00535846		5.36403	4.18184	-0.00454187		5.36403	4.19443	-0.0466228
5.37123	4.16837	-0.0286043		5.37123	4.17312	-0.00934005		5.37123	4.17169	0.00191927		5.37123	4.18532	0.00127554		5.37123	4.17733	-0.0121951		5.37123	4.17029	-0.00965595		5.37123	4.17488	0.0241935		5.37123	4.1707	-0.0202417		5.37123	4.18143	-0.00177026		5.37123	4.17958	-0.00679493		5.37123	4.19346	-0.0475943
5.37843	4.16837	-0.0286043		5.37843	4.17609	-0.00637174		5.37843	4.17204	0.0022769		5.37843	4.18771	0.00365972		5.37843	4.17473	-0.0147879		5.37843	4.1675	-0.0124395		5.37843	4.17552	0.0248313		5.37843	4.17453	-0.0164092		5.37843	4.18466	0.00145435		5.37843	4.17701	-0.00936985		5.37843	4.19282	-0.048238
5.38563	4.1686	-0.0283718		5.38563	4.17865	-0.0038147		5.38563	4.17262	0.00285506		5.38563	4.19019	0.00614524		5.38563	4.17247	-0.0170529		5.38563	4.16421	-0.0157356		5.38563	4.1756	0.0249088		5.38563	4.17868	-0.0122547		5.38563	4.18734	0.00413656		5.38563	4.1742	-0.0121832		5.38563	4.19264	-0.0484169
5.39283	4.16917	-0.0277996		5.39283	4.18062	-0.00184178		5.39283	4.17334	0.00357628		5.39283	4.19242	0.00836849		5.39283	4.17053	-0.01899		5.39283	4.16097	-0.0189722		5.39283	4.1753	0.0246108		5.39283	4.18267	-0.00826716		5.39283	4.18931	0.00610352		5.39283	4.17127	-0.0151098		5.39283	4.19291	-0.0481427
5.40003	4.17009	-0.0268817		5.40003	4.18194	-0.000524521		5.40003	4.17416	0.00439286		5.40003	4.19395	0.00990033		5.40003	4.1688	-0.0207186		5.40003	4.15833	-0.0216126		5.40003	4.17501	0.0243247		5.40003	4.18595	-0.00498891		5.40003	4.19044	0.00724196		5.40003	4.16836	-0.0180244		5.40003	4.19351	-0.0475407
5.40723	4.17131	-0.0256598		5.40723	4.1827	0.000238419		5.40723	4.1751	0.00533462		5.40723	4.19438	0.0103295		5.40723	4.16715	-0.0223696		5.40723	4.15671	-0.0232339		5.40723	4.17514	0.0244498		5.40723	4.18797	-0.00296831		5.40723	4.19067	0.00746846		5.40723	4.16554	-0.0208437		5.40723	4.19425	-0.0468016
5.41443	4.17279	-0.0241816		5.41443	4.18309	0.000625849		5.41443	4.17622	0.00645518		5.41443	4.1934	0.00934601		5.41443	4.16555	-0.023967		5.41443	4.15635	-0.0235975		5.41443	4.17586	0.025171		5.41443	4.18831	-0.00262856		5.41443	4.19005	0.00684261		5.41443	4.16291	-0.0234723		5.41443	4.195	-0.0460505
5.42163	4.17449	-0.0224829		5.42163	4.18324	0.000780821		5.42163	4.17757	0.00780225		5.42163	4.19093	0.00688434		5.42163	4.16412	-0.0254035		5.42163	4.15721	-0.0227332		5.42163	4.17712	0.0264347		5.42163	4.18682	-0.00411868		5.42163	4.1888	0.00559688		5.42163	4.16062	-0.0257552		5.42163	4.19569	-0.0453651
5.42883	4.17631	-0.020659		5.42883	4.18323	0.000762939		5.42883	4.17917	0.00939965		5.42883	4.18714	0.00309348		5.42883	4.16303	-0.0264943		5.42883	4.15898	-0.020963		5.42883	4.17872	0.0280321		5.42883	4.18374	-0.00720024		5.42883	4.18724	0.00404119		5.42883	4.15879	-0.027591		5.42883	4.19622	-0.0448346
5.43603	4.17811	-0.0188649		5.43603	4.18298	0.0005126		5.43603	4.181	0.0112295		5.43603	4.18237	-0.00167489		5.43603	4.1624	-0.0271261		5.43603	4.16122	-0.0187218		5.43603	4.18039	0.029701		5.43603	4.17955	-0.0113904		5.43603	4.18567	0.00246763		5.43603	4.15741	-0.0289738		5.43603	4.19647	-0.0445843
5.44323	4.17973	-0.0172436		5.44323	4.18238	-8.34465e-05		5.44323	4.18293	0.0131667		5.44323	4.17715	-0.00690222		5.44323	4.16229	-0.0272274		5.44323	4.16352	-0.0164211		5.44323	4.18185	0.0311613		5.44323	4.17477	-0.0161648		5.44323	4.18425	0.00104308		5.44323	4.15629	-0.0300944		5.44323	4.19636	-0.0446916
5.45043	4.18116	-0.0158131		5.45043	4.18136	-0.00110269		5.45043	4.18474	0.0149727		5.45043	4.17214	-0.011909		5.45043	4.16275	-0.0267684		5.45043	4.16564	-0.0143051		5.45043	4.18273	0.0320435		5.45043	4.16989	-0.0210524		5.45043	4.18301	-0.000190735		5.45043	4.15517	-0.031209		5.45043	4.19593	-0.0451207
5.45763	4.18244	-0.0145316		5.45763	4.17998	-0.00247955		5.45763	4.18612	0.0163555		5.45763	4.16803	-0.0160217		5.45763	4.16384	-0.0256836		5.45763	4.16749	-0.0124574		5.45763	4.18274	0.0320554		5.45763	4.16527	-0.0256717		5.45763	4.18191	-0.00129342		5.45763	4.15386	-0.0325203		5.45763	4.19533	-0.0457227
5.46483	4.18364	-0.0133276		5.46483	4.17837	-0.00409484		5.46483	4.18683	0.0170588		5.46483	4.16538	-0.0186682		5.46483	4.16561	-0.0239074		5.46483	4.16908	-0.01086		5.46483	4.18169	0.0310063		5.46483	4.16123	-0.0297129		5.46483	4.18088	-0.00232458		5.46483	4.15238	-0.0340044		5.46483	4.1948	-0.0462532
5.47204	4.18482	-0.0121534		5.47204	4.1767	-0.00576377		5.47204	4.18677	0.0169992		5.47204	4.16445	-0.019604		5.47204	4.16803	-0.0214875		5.47204	4.17053	-0.00941753		5.47204	4.17969	0.0290036		5.47204	4.15793	-0.0330091		5.47204	4.17979	-0.00340939		5.47204	4.15088	-0.0355005		5.47204	4.19458	-0.0464737
5.47924	4.18602	-0.0109553		5.47924	4.17523	-0.00723004		5.47924	4.18599	0.0162244		5.47924	4.16509	-0.0189602		5.47924	4.17093	-0.0185907		5.47924	4.17191	-0.00802875		5.47924	4.17696	0.0262678		5.47924	4.15543	-0.0355124		5.47924	4.17853	-0.004673		5.47924	4.14965	-0.0367343		5.47924	4.19486	-0.0461936
5.48644	4.18734	-0.00963211		5.48644	4.17426	-0.0082016		5.48644	4.18467	0.0149012		5.48644	4.16684	-0.0172079		5.48644	4.17404	-0.0154853		5.48644	4.17336	-0.00658035		5.48644	4.17385	0.0231624		5.48644	4.15361	-0.0373304		5.48644	4.17696	-0.00624657		5.48644	4.14889	-0.0374854		5.48644	4.19573	-0.0453234
5.49364	4.18895	-0.00802278		5.49364	4.17404	-0.0084281		5.49364	4.183	0.0132322		5.49364	4.16911	-0.0149369		5.49364	4.17711	-0.0124156		5.49364	4.17488	-0.00506043		5.49364	4.1707	0.0200093		5.49364	4.15236	-0.0385761		5.49364	4.17501	-0.00819564		5.49364	4.14879	-0.0375926		5.49364	4.19718	-0.043875
5.50084	4.19088	-0.0060916		5.50084	4.17459	-0.00787377		5.50084	4.18124	0.0114739		5.50084	4.17132	-0.0127316		5.50084	4.18003	-0.00949502		5.50084	4.17635	-0.0035882		5.50084	4.16786	0.0171721		5.50084	4.15161	-0.0393271		5.50084	4.17276	-0.0104427		5.50084	4.14941	-0.0369728		5.50084	4.19913	-0.0419259
5.50804	4.19306	-0.00391602		5.50804	4.17573	-0.00672936		5.50804	4.17967	0.00990033		5.50804	4.17308	-0.0109732		5.50804	4.18276	-0.00676513		5.50804	4.17755	-0.00239611		5.50804	4.16564	0.0149548		5.50804	4.15136	-0.0395775		5.50804	4.17044	-0.0127673		5.50804	4.15075	-0.0356317		5.50804	4.20142	-0.0396311
5.51524	4.19527	-0.00170469		5.51524	4.17707	-0.00539422		5.51524	4.17851	0.00873804		5.51524	4.1742	-0.00985265		5.51524	4.18528	-0.00423789		5.51524	4.17821	-0.00172853		5.51524	4.16425	0.0135601		5.51524	4.15165	-0.0392914		5.51524	4.16829	-0.0149131		5.51524	4.15269	-0.0336885		5.51524	4.20381	-0.0372469
5.52244	4.19724	0.000268221		5.52244	4.17824	-0.00422001		5.52244	4.17779	0.00802278		5.52244	4.17472	-0.00933409		5.52244	4.18755	-0.00196695		5.52244	4.17814	-0.00180006		5.52244	4.16375	0.0130594		5.52244	4.15261	-0.0383258		5.52244	4.16647	-0.016737		5.52244	4.15504	-0.0313401		5.52244	4.20593	-0.035125
5.52964	4.19869	0.00171661		5.52964	4.17898	-0.00348687		5.52964	4.17733	0.00756383		5.52964	4.17492	-0.00913143		5.52964	4.18949	-2.98023e-05		5.52964	4.17724	-0.00270605		5.52964	4.16408	0.0133872		5.52964	4.15435	-0.0365853		5.52964	4.16496	-0.018245		5.52964	4.15753	-0.0288486		5.52964	4.20747	-0.0335813
5.53684	4.19932	0.00234842		5.53684	4.17913	-0.0033319		5.53684	4.17681	0.00704527		5.53684	4.17521	-0.00883937		5.53684	4.19114	0.00162125		5.53684	4.17545	-0.00449419		5.53684	4.16508	0.0143886		5.53684	4.15688	-0.0340581		5.53684	4.16368	-0.0195205		5.53684	4.15994	-0.0264406		5.53684	4.20828	-0.0327766
5.54404	4.19894	0.00196695		5.54404	4.17861	-0.00385046		5.54404	4.17597	0.00619888		5.54404	4.17599	-0.00805855		5.54404	4.19264	0.00312328		5.54404	4.17281	-0.00712872		5.54404	4.16654	0.0158548		5.54404	4.15999	-0.0309467		5.54404	4.16258	-0.0206232		5.54404	4.16211	-0.0242651		5.54404	4.20843	-0.0326216
5.55124	4.19748	0.0005126		5.55124	4.17746	-0.00500679		5.55124	4.17467	0.00490546		5.55124	4.17753	-0.00652075		5.55124	4.19419	0.004673		5.55124	4.16943	-0.0105083		5.55124	4.16821	0.0175238		5.55124	4.16331	-0.0276327		5.55124	4.16163	-0.0215709		5.55124	4.16402	-0.0223637		5.55124	4.20819	-0.032866
5.55844	4.19513	-0.00184178		5.55844	4.17587	-0.00659823		5.55844	4.17295	0.00318289		5.55844	4.17984	-0.00421405		5.55844	4.19589	0.00636578		5.55844	4.16556	-0.0143826		5.55844	4.16981	0.0191212		5.55844	4.16637	-0.024569		5.55844	4.1608	-0.0223994		5.55844	4.16568	-0.0207007		5.55844	4.20778	-0.0332713
5.56564	4.19227	-0.00469685		5.56564	4.17421	-0.00825524		5.56564	4.17089	0.00112057		5.56564	4.18268	-0.00137091		5.56564	4.19771	0.00818968		5.56564	4.1615	-0.0184417		5.56564	4.17106	0.0203729		5.56564	4.16878	-0.022155		5.56564	4.16005	-0.0231564		5.56564	4.1672	-0.0191808		5.56564	4.20741	-0.0336468
5.57284	4.18938	-0.00759363		5.57284	4.17285	-0.00961423		5.57284	4.16867	-0.00109673		5.57284	4.18566	0.00160932		5.57284	4.19957	0.0100493		5.57284	4.15759	-0.0223517		5.57284	4.17172	0.0210285		5.57284	4.17031	-0.0206292		5.57284	4.15929	-0.0239134		5.57284	4.16863	-0.0177503		5.57284	4.20715	-0.0339091
5.58004	4.18688	-0.0100911		5.58004	4.17198	-0.0104845		5.58004	4.16662	-0.00314712		5.58004	4.18839	0.00434518		5.58004	4.20139	0.0118673		5.58004	4.15412	-0.0258207		5.58004	4.17163	0.0209451		5.58004	4.17078	-0.0201643		5.58004	4.15854	-0.0246644		5.58004	4.16998	-0.0164032		5.58004	4.20706	-0.0339985
5.58724	4.18508	-0.0118911		5.58724	4.17153	-0.0109315		5.58724	4.16518	-0.00458956		5.58724	4.19061	0.00655651		5.58724	4.20313	0.0136077		5.58724	4.15135	-0.0285923		5.58724	4.17081	0.0201225		5.58724	4.1702	-0.0207365		5.58724	4.15789	-0.0253141		5.58724	4.17114	-0.0152349		5.58724	4.20715	-0.0339031
5.59444	4.18408	-0.0128925		5.59444	4.17125	-0.0112116		5.59444	4.16476	-0.00500679		5.59444	4.19221	0.00815988		5.59444	4.20468	0.0151634		5.59444	4.14947	-0.0304699		5.59444	4.16936	0.0186741		5.59444	4.16878	-0.022155		5.59444	4.15751	-0.0256956		5.59444	4.17208	-0.0142992		5.59444	4.20733	-0.0337243
5.60164	4.18377	-0.0132024		5.60164	4.17087	-0.0115931		5.60164	4.16558	-0.00419021		5.60164	4.19327	0.00922084		5.60164	4.20591	0.0163913		5.60164	4.14862	-0.0313222		5.60164	4.16746	0.0167668		5.60164	4.16698	-0.0239611		5.60164	4.15749	-0.0257134		5.60164	4.17277	-0.0136077		5.60164	4.20738	-0.0336766
5.60884	4.18382	-0.0131547		5.60884	4.17017	-0.0122964		5.60884	4.16757	-0.00219345		5.60884	4.19396	0.00991225		5.60884	4.20667	0.0171483		5.60884	4.14883	-0.0311136		5.60884	4.1653	0.0146091		5.60884	4.16535	-0.0255883		5.60884	4.15779	-0.0254095		5.60884	4.17328	-0.0130951		5.60884	4.20714	-0.033915
5.61604	4.1838	-0.0131726		5.61604	4.16906	-0.0134051		5.61604	4.17055	0.000780821		5.61604	4.19447	0.0104189		5.61604	4.20688	0.0173569		5.61604	4.14996	-0.0299811		5.61604	4.1631	0.0124156		5.61604	4.1644	-0.026536		5.61604	4.15828	-0.0249267		5.61604	4.1737	-0.0126779		5.61604	4.20662	-0.0344336
5.62324	4.18333	-0.0136375		5.62324	4.16752	-0.0149429		5.62324	4.17417	0.00440478		5.62324	4.19496	0.0109077		5.62324	4.20665	0.0171244		5.62324	4.15173	-0.0282109		5.62324	4.16107	0.0103831		5.62324	4.1644	-0.026536		5.62324	4.15877	-0.0244319		5.62324	4.17407	-0.0123143		5.62324	4.20605	-0.0350058
5.63044	4.1822	-0.014776		5.63044	4.16563	-0.0168383		5.63044	4.17812	0.00835061		5.63044	4.19543	0.0113785		5.63044	4.20616	0.0166357		5.63044	4.15381	-0.0261307		5.63044	4.15935	0.00866055		5.63044	4.16536	-0.0255764		5.63044	4.15916	-0.0240445		5.63044	4.1743	-0.0120759		5.63044	4.20572	-0.0353336
5.63764	4.18037	-0.0165999		5.63764	4.16352	-0.0189424		5.63764	4.182	0.0122309		5.63764	4.1957	0.0116467		5.63764	4.20557	0.0160456		5.63764	4.15587	-0.0240684		5.63764	4.15801	0.00731945		5.63764	4.16708	-0.0238597		5.63764	4.15934	-0.0238597		5.63764	4.17433	-0.0120461		5.63764	4.20585	-0.0352025
5.64484	4.17806	-0.0189126		5.64484	4.16145	-0.0210106		5.64484	4.18549	0.0157237		5.64484	4.1954	0.0113547		5.64484	4.20495	0.0154257		5.64484	4.15776	-0.0221848		5.64484	4.15704	0.0063479		5.64484	4.16926	-0.0216782		5.64484	4.15919	-0.0240088		5.64484	4.17411	-0.0122666		5.64484	4.2065	-0.0345588
5.65204	4.17559	-0.0213861		5.65204	4.15971	-0.0227511		5.65204	4.18842	0.0186563		5.65204	4.19419	0.0101387		5.65204	4.20431	0.0147879		5.65204	4.15938	-0.0205576		5.65204	4.15639	0.0056982		5.65204	4.17158	-0.0193596		5.65204	4.15856	-0.0246406		5.65204	4.17373	-0.0126481		5.65204	4.20759	-0.033468
5.65924	4.17336	-0.0236154		5.65924	4.15856	-0.0239015		5.65924	4.19081	0.0210464		5.65924	4.19186	0.00780821		5.65924	4.20364	0.0141144		5.65924	4.16074	-0.0192046		5.65924	4.15604	0.0053525		5.65924	4.17368	-0.0172555		5.65924	4.1573	-0.0258982		5.65924	4.1733	-0.0130773		5.65924	4.209	-0.0320554
5.66644	4.17169	-0.0252843		5.66644	4.15815	-0.0243127		5.66644	4.1928	0.0230312		5.66644	4.18848	0.00443459		5.66644	4.20293	0.013411		5.66644	4.16179	-0.0181496		5.66644	4.15604	0.00534654		5.66644	4.17529	-0.0156462		5.66644	4.15539	-0.0278175		5.66644	4.17295	-0.0134349		5.66644	4.21057	-0.0304878
5.67364	4.17072	-0.0262558		5.67364	4.15843	-0.0240326		5.67364	4.19456	0.0247955		5.67364	4.18442	0.000369549		5.67364	4.20212	0.0125945		5.67364	4.16253	-0.0174105		5.67364	4.15648	0.00579357		5.67364	4.17619	-0.0147462		5.67364	4.15286	-0.0303388		5.67364	4.1727	-0.0136793		5.67364	4.21204	-0.0290155
5.68084	4.17043	-0.0265419		5.68084	4.15925	-0.02321		5.68084	4.19623	0.0264585		5.68084	4.18015	-0.00389814		5.68084	4.20103	0.0115097		5.68084	4.16298	-0.0169635		5.68084	4.15748	0.00679493		5.68084	4.17636	-0.0145793		5.68084	4.14989	-0.033313		5.68084	4.17262	-0.0137627		5.68084	4.2131	-0.0279546
5.68804	4.17071	-0.0262618		5.68804	4.16045	-0.022012		5.68804	4.19788	0.0281095		5.68804	4.17621	-0.00783801		5.68804	4.19952	0.0099957		5.68804	4.1632	-0.0167429		5.68804	4.1591	0.00841022		5.68804	4.176	-0.0149429		5.68804	4.14671	-0.03649		5.68804	4.17277	-0.0136077		5.68804	4.21348	-0.0275791
5.69524	4.17143	-0.0255406		5.69524	4.16198	-0.0204802		5.69524	4.19952	0.0297487		5.69524	4.17307	-0.0109792		5.69524	4.19757	0.00805259		5.69524	4.16321	-0.016737		5.69524	4.16121	0.0105262		5.69524	4.17539	-0.0155449		5.69524	4.14365	-0.0395536		5.69524	4.17315	-0.0132322		5.69524	4.21309	-0.0279665
5.70244	4.17252	-0.0244558		5.70244	4.16386	-0.0186086		5.70244	4.20102	0.0312507		5.70244	4.17105	-0.0129998		5.70244	4.19532	0.00579953		5.70244	4.16291	-0.017035		5.70244	4.1636	0.0129104		5.70244	4.17481	-0.016129		5.70244	4.14112	-0.0420868		5.70244	4.17359	-0.0127852		5.70244	4.21211	-0.02895
5.70964	4.17391	-0.023061		5.70964	4.16605	-0.0164092		5.70964	4.20213	0.0323653		5.70964	4.17028	-0.0137687		5.70964	4.19293	0.00340939		5.70964	4.16224	-0.0177026		5.70964	4.16588	0.0151932		5.70964	4.17439	-0.0165522		5.70964	4.13948	-0.043726		5.70964	4.1738	-0.0125825		5.70964	4.21086	-0.0301957
5.71684	4.17557	-0.0213981		5.71684	4.16843	-0.0140309		5.71684	4.20258	0.0328124		5.71684	4.17063	-0.013417		5.71684	4.19043	0.000911951		5.71684	4.16126	-0.0186801		5.71684	4.16768	0.0169933		5.71684	4.17415	-0.0167906		5.71684	4.13902	-0.044179		5.71684	4.17348	-0.0128984		5.71684	4.20972	-0.0313342
5.72404	4.17755	-0.0194192		5.72404	4.1707	-0.01176		5.72404	4.20217	0.0324011		5.72404	4.17167	-0.0123799		5.72404	4.18782	-0.00169873		5.72404	4.16025	-0.0196934		5.72404	4.16857	0.0178814		5.72404	4.17413	-0.0168145		5.72404	4.13987	-0.0433326		5.72404	4.17255	-0.0138342		5.72404	4.20895	-0.0321031
5.73124	4.17992	-0.0170529		5.73124	4.17258	-0.00988245		5.73124	4.20083	0.03106		5.73124	4.17283	-0.0112176		5.73124	4.18512	-0.00439882		5.73124	4.15954	-0.0204027		5.73124	4.16819	0.0175059		5.73124	4.17427	-0.0166655		5.73124	4.14203	-0.0411689		5.73124	4.17112	-0.0152588		5.73124	4.20862	-0.0324368
5.73844	4.18271	-0.0142574		5.73844	4.17385	-0.00861883		5.73844	4.1986	0.0288367		5.73844	4.17354	-0.0105143		5.73844	4.18249	-0.00703335		5.73844	4.15943	-0.0205159		5.73844	4.16639	0.0156999		5.73844	4.17449	-0.0164449		5.73844	4.14535	-0.0378489		5.73844	4.16949	-0.016892		5.73844	4.20865	-0.0324011
5.74564	4.18584	-0.0111341		5.74564	4.1744	-0.00806451		5.74564	4.19562	0.0258565		5.74564	4.17342	-0.0106335		5.74564	4.18011	-0.00941157		5.74564	4.16003	-0.019908		5.74564	4.16326	0.0125706		5.74564	4.17452	-0.0164151		5.74564	4.14951	-0.0336945		5.74564	4.16794	-0.0184357		5.74564	4.20893	-0.0321269
5.75284	4.18902	-0.00795126		5.75284	4.17418	-0.00827909		5.75284	4.19206	0.0222921		5.75284	4.17238	-0.0116646		5.75284	4.1782	-0.0113189		5.75284	4.16142	-0.0185192		5.75284	4.15915	0.00846386		5.75284	4.17411	-0.0168264		5.75284	4.15395	-0.029254		5.75284	4.16681	-0.0195742		5.75284	4.20929	-0.0317693
5.76004	4.19191	-0.00506639		5.76004	4.1732	-0.00926256		5.76004	4.18817	0.0184059		5.76004	4.17059	-0.0134587		5.76004	4.1769	-0.0126183		5.76004	4.16359	-0.0163555		5.76004	4.1545	0.0038147		5.76004	4.1731	-0.0178397		5.76004	4.1581	-0.0251055		5.76004	4.16633	-0.020045		5.76004	4.20955	-0.031507
5.76724	4.19415	-0.0028193		5.76724	4.17156	-0.0109017		5.76724	4.1842	0.0144362		5.76724	4.16831	-0.0157416		5.76724	4.17634	-0.0131786		5.76724	4.16637	-0.013572		5.76724	4.14968	-0.00100732		5.76724	4.17151	-0.0194252		5.76724	4.16148	-0.0217259		5.76724	4.16669	-0.0196874		5.76724	4.20946	-0.0315905
5.77444	4.19552	-0.00145435		5.77444	4.16958	-0.0128806		5.77444	4.18034	0.0105679		5.77444	4.16587	-0.0181794		5.77444	4.17658	-0.0129402		5.77444	4.16949	-0.0104547		5.77444	4.14502	-0.0056684		5.77444	4.16952	-0.0214159		5.77444	4.16383	-0.0193715		5.77444	4.16784	-0.018537		5.77444	4.20879	-0.03227
5.78164	4.1959	-0.00107288		5.78164	4.16774	-0.0147223		5.78164	4.17669	0.00692606		5.78164	4.16362	-0.0204265		5.78164	4.17759	-0.0119328		5.78164	4.17254	-0.0074029		5.78164	4.14086	-0.00982881		5.78164	4.16734	-0.0235975		5.78164	4.16512	-0.018084		5.78164	4.1695	-0.01688		5.78164	4.20739	-0.0336647
5.78884	4.19531	-0.00166297		5.78884	4.16653	-0.0159383		5.78884	4.17333	0.0035584		5.78884	4.16189	-0.022155		5.78884	4.17916	-0.0103652		5.78884	4.17517	-0.00476837		5.78884	4.13753	-0.0131607		5.78884	4.16523	-0.0257075		5.78884	4.16536	-0.0178456		5.78884	4.17129	-0.0150859		5.78884	4.20547	-0.0355899
5.79604	4.19387	-0.00309944		5.79604	4.16628	-0.0161827		5.79604	4.17024	0.000476837		5.79604	4.16099	-0.0230551		5.79604	4.18094	-0.00857711		5.79604	4.17719	-0.00274777		5.79604	4.13522	-0.0154674		5.79604	4.16352	-0.0274181		5.79604	4.16466	-0.018543		5.79604	4.17286	-0.0135183		5.79604	4.20346	-0.0375986
5.80324	4.19179	-0.0051856		5.80324	4.16717	-0.0152946		5.80324	4.16743	-0.00234246		5.80324	4.1611	-0.0229478		5.80324	4.18251	-0.00700951		5.80324	4.17861	-0.00132918		5.80324	4.13395	-0.016737		5.80324	4.16263	-0.0283062		5.80324	4.16321	-0.0199914		5.80324	4.174	-0.0123799		5.80324	4.20192	-0.0391304
5.81044	4.1893	-0.00767112		5.81044	4.16914	-0.0133216		5.81044	4.16487	-0.00489354		5.81044	4.16225	-0.0217974		5.81044	4.18344	-0.00608563		5.81044	4.17957	-0.000375509		5.81044	4.13365	-0.017035		5.81044	4.16293	-0.0280082		5.81044	4.16136	-0.0218391		5.81044	4.17466	-0.0117242		5.81044	4.20126	-0.0397921
5.81764	4.18668	-0.0102937		5.81764	4.17205	-0.0104129		5.81764	4.1627	-0.00706911		5.81764	4.16428	-0.0197709		5.81764	4.18344	-0.00608563		5.81764	4.18019	0.000244379		5.81764	4.13433	-0.0163555		5.81764	4.16459	-0.0263512		5.81764	4.15962	-0.0235856		5.81764	4.17484	-0.0115395		5.81764	4.20163	-0.0394225
5.82484	4.1841	-0.0128746		5.82484	4.17567	-0.00679493		5.82484	4.16111	-0.00866056		5.82484	4.16694	-0.0171125		5.82484	4.1825	-0.00702143		5.82484	4.18062	0.000673532		5.82484	4.13613	-0.0145614		5.82484	4.16749	-0.0234544		5.82484	4.15841	-0.0247896		5.82484	4.17462	-0.01176		5.82484	4.20304	-0.0380158
5.83204	4.18161	-0.0153661		5.83204	4.1797	-0.0027597		5.83204	4.16031	-0.0094533		5.83204	4.17004	-0.0140071		5.83204	4.1809	-0.00861883		5.83204	4.18091	0.000965595		5.83204	4.13915	-0.0115395		5.83204	4.17123	-0.0197053		5.83204	4.15804	-0.0251651		5.83204	4.1741	-0.0122845		5.83204	4.20544	-0.0356197
5.83924	4.17918	-0.017792		5.83924	4.18379	0.00132322		5.83924	4.16036	-0.00940561		5.83924	4.17349	-0.010556		5.83924	4.17911	-0.010407		5.83924	4.18101	0.00106692		5.83924	4.14326	-0.0074327		5.83924	4.17537	-0.0155687		5.83924	4.15856	-0.0246465		5.83924	4.17336	-0.0130177		5.83924	4.20867	-0.0323892
5.84644	4.17673	-0.0202417		5.84644	4.18754	0.00507832		5.84644	4.16116	-0.00860691		5.84644	4.17724	-0.00680685		5.84644	4.17761	-0.011915		5.84644	4.1808	0.000858307		5.84644	4.1481	-0.00258684		5.84644	4.17944	-0.0114977		5.84644	4.15991	-0.0232935		5.84644	4.17252	-0.013864		5.84644	4.21234	-0.0287116
5.85364	4.17421	-0.0227571		5.85364	4.19064	0.0081718		5.85364	4.1625	-0.00727177		5.85364	4.18117	-0.0028789		5.85364	4.17668	-0.0128448		5.85364	4.18006	0.000119209		5.85364	4.15317	0.00248551		5.85364	4.18304	-0.00790358		5.85364	4.16197	-0.0212312		5.85364	4.17163	-0.0147462		5.85364	4.21588	-0.025171
5.86084	4.17162	-0.0253558		5.86084	4.19284	0.0103712		5.86084	4.16418	-0.00559092		5.86084	4.1851	0.001055		5.86084	4.17653	-0.0129938		5.86084	4.17859	-0.00135303		5.86084	4.15803	0.00734329		5.86084	4.18583	-0.00510812		5.86084	4.16459	-0.0186086		5.86084	4.17075	-0.0156283		5.86084	4.21867	-0.0223815
5.86804	4.16892	-0.0280559		5.86804	4.19399	0.0115216		5.86804	4.16604	-0.00373125		5.86804	4.18885	0.00480413		5.86804	4.17719	-0.0123322		5.86804	4.17633	-0.00361204		5.86804	4.16234	0.0116467		5.86804	4.18762	-0.00331998		5.86804	4.16749	-0.0157177		5.86804	4.16986	-0.0165164		5.86804	4.22038	-0.0206769
5.87524	4.1661	-0.0308752		5.87524	4.19402	0.0115514		5.87524	4.16789	-0.00187755		5.87524	4.19233	0.00828505		5.87524	4.17856	-0.0109613		5.87524	4.17339	-0.00655055		5.87524	4.16588	0.0151932		5.87524	4.18842	-0.00252128		5.87524	4.17016	-0.0130475		5.87524	4.16895	-0.0174344		5.87524	4.22101	-0.020045
5.88244	4.1632	-0.033772		5.88244	4.19296	0.0104964		5.88244	4.16954	-0.000226498		5.88244	4.1955	0.0114501		5.88244	4.18031	-0.00920892		5.88244	4.17014	-0.009799		5.88244	4.1685	0.0178158		5.88244	4.18847	-0.00246763		5.88244	4.1721	-0.0111043		5.88244	4.16805	-0.0183284		5.88244	4.22086	-0.0202
5.88964	4.16031	-0.0366628		5.88964	4.19098	0.0085175		5.88964	4.17089	0.00112057		5.88964	4.19821	0.0141621		5.88964	4.18199	-0.00753403		5.88964	4.16711	-0.0128329		5.88964	4.17015	0.0194609		5.88964	4.18815	-0.0027895		5.88964	4.17299	-0.0102162		5.88964	4.16724	-0.0191391		5.88964	4.22016	-0.0208914
5.89684	4.15757	-0.0394046		5.89684	4.18839	0.0059247		5.89684	4.17199	0.00221729		5.89684	4.20021	0.0161648		5.89684	4.18318	-0.00634193		5.89684	4.16486	-0.01508		5.89684	4.17089	0.0202		5.89684	4.18776	-0.00317693		5.89684	4.17284	-0.0103593		5.89684	4.16655	-0.0198305		5.89684	4.21915	-0.0219047
5.90404	4.15515	-0.0418186		5.90404	4.18558	0.00311732		5.90404	4.17306	0.00329614		5.90404	4.20122	0.0171661		5.90404	4.18372	-0.00580549		5.90404	4.16389	-0.0160575		5.90404	4.17101	0.0203192		5.90404	4.18748	-0.00346303		5.90404	4.17195	-0.0112534		5.90404	4.16599	-0.0203907		5.90404	4.21789	-0.0231624
5.91124	4.15328	-0.0436962		5.91124	4.18295	0.000482798		5.91124	4.17441	0.00463724		5.91124	4.20105	0.0169992		5.91124	4.18372	-0.00580549		5.91124	4.16451	-0.0154376		5.91124	4.17091	0.0202179		5.91124	4.18726	-0.00368357		5.91124	4.17065	-0.0125527		5.91124	4.16548	-0.0209033		5.91124	4.21643	-0.0246286
5.91844	4.15218	-0.0447869		5.91844	4.18085	-0.00161529		5.91844	4.17622	0.00645518		5.91844	4.19974	0.0156879		5.91844	4.18352	-0.00599623		5.91844	4.16675	-0.0131965		5.91844	4.17095	0.0202656		5.91844	4.1869	-0.00403523		5.91844	4.16927	-0.0139356		5.91844	4.16496	-0.0214159		5.91844	4.21477	-0.0262856
5.92564	4.15214	-0.0448346		5.92564	4.17959	-0.00287294		5.92564	4.17859	0.00882149		5.92564	4.19741	0.0133574		5.92564	4.18349	-0.00603199		5.92564	4.17038	-0.00956655		5.92564	4.1714	0.0207067		5.92564	4.18616	-0.00478029		5.92564	4.16814	-0.0150621		5.92564	4.16442	-0.0219584		5.92564	4.21283	-0.0282228
5.93284	4.15321	-0.0437617		5.93284	4.17941	-0.00305176		5.93284	4.18139	0.0116169		5.93284	4.19422	0.0101745		5.93284	4.18383	-0.00569224		5.93284	4.17491	-0.00503659		5.93284	4.17226	0.0215709		5.93284	4.18472	-0.00621676		5.93284	4.16766	-0.0155389		5.93284	4.16387	-0.0225127		5.93284	4.2105	-0.0305533
5.94004	4.15525	-0.0417173		5.94004	4.18042	-0.00204444		5.94004	4.18438	0.0146091		5.94004	4.19033	0.00628233		5.94004	4.18457	-0.00495315		5.94004	4.17966	-0.000280142		5.94004	4.17347	0.0227809		5.94004	4.1824	-0.00853539		5.94004	4.16816	-0.0150442		5.94004	4.16338	-0.0230014		5.94004	4.20771	-0.0333428
5.94724	4.15793	-0.039041		5.94724	4.18251	4.76837e-05		5.94724	4.18728	0.0175118		5.94724	4.18593	0.00187755		5.94724	4.18562	-0.00389814		5.94724	4.18391	0.00396967		5.94724	4.17495	0.0242651		5.94724	4.17916	-0.0117779		5.94724	4.1697	-0.0135005		5.94724	4.16304	-0.0233352		5.94724	4.2046	-0.0364542
5.95444	4.16081	-0.0361621		5.95444	4.1854	0.00293851		5.95444	4.18983	0.020057		5.95444	4.18127	-0.00277758		5.95444	4.18674	-0.00277758		5.95444	4.18704	0.00709891		5.95444	4.17671	0.0260174		5.95444	4.17519	-0.0157535		5.95444	4.17204	-0.011158		5.95444	4.16295	-0.0234306		5.95444	4.20153	-0.0395298
5.96164	4.16347	-0.0335038		5.96164	4.1887	0.00623465		5.96164	4.1918	0.0220299		5.96164	4.17659	-0.00745654		5.96164	4.18765	-0.00187159		5.96164	4.18867	0.00873208		5.96164	4.17873	0.028044		5.96164	4.17084	-0.0200987		5.96164	4.17477	-0.00843406		5.96164	4.1631	-0.0232816		5.96164	4.19896	-0.0420988
5.96884	4.16554	-0.0314295		5.96884	4.19205	0.00958443		5.96884	4.19304	0.0232697		5.96884	4.17203	-0.0120223		5.96884	4.18801	-0.001508		5.96884	4.18873	0.00879169		5.96884	4.181	0.030309		5.96884	4.16661	-0.0243306		5.96884	4.17752	-0.00568628		5.96884	4.16344	-0.0229359		5.96884	4.19741	-0.0436485
5.97604	4.1667	-0.0302672		5.97604	4.19511	0.0126481		5.97604	4.19344	0.023669		5.97604	4.16758	-0.0164688		5.97604	4.18753	-0.0019908		5.97604	4.18743	0.0074923		5.97604	4.18335	0.0326574		5.97604	4.16299	-0.0279546		5.97604	4.18	-0.00320077		5.97604	4.16396	-0.0224233		5.97604	4.19725	-0.0438035
5.98324	4.16678	-0.0301898		5.98324	4.19755	0.0150859		5.98324	4.19303	0.0232577		5.98324	4.16327	-0.0207841		5.98324	4.18606	-0.00345707		5.98324	4.18518	0.00523329		5.98324	4.18562	0.0349283		5.98324	4.16039	-0.0305474		5.98324	4.18201	-0.00119209		5.98324	4.16462	-0.0217617		5.98324	4.19869	-0.042367
5.99044	4.16589	-0.0310838		5.99044	4.19906	0.0165939		5.99044	4.19194	0.022167		5.99044	4.15913	-0.0249147		5.99044	4.18368	-0.00584126		5.99044	4.1825	0.00255704		5.99044	4.18773	0.0370443		5.99044	4.15909	-0.0318527		5.99044	4.18333	0.00012517		5.99044	4.16545	-0.0209332		5.99044	4.20167	-0.0393867
5.99764	4.16437	-0.0325978		5.99764	4.19942	0.0169575		5.99764	4.19048	0.0207126		5.99764	4.15531	-0.0287414		5.99764	4.18077	-0.00874996		5.99764	4.17998	3.57628e-05		5.99764	4.18971	0.0390172		5.99764	4.15912	-0.0318229		5.99764	4.18382	0.000619888		5.99764	4.1664	-0.0199795		5.99764	4.20583	-0.0352263
6.00484	4.16272	-0.0342488		6.00484	4.1986	0.016135		6.00484	4.18899	0.0192225		6.00484	4.15192	-0.0321269		6.00484	4.17788	-0.0116408		6.00484	4.17815	-0.0017941		6.00484	4.19157	0.0408769		6.00484	4.1603	-0.0306368		6.00484	4.18361	0.000405312		6.00484	4.16736	-0.0190198		6.00484	4.21067	-0.0303805
6.01204	4.16133	-0.0356376		6.01204	4.19672	0.0142515		6.01204	4.18771	0.017941		6.01204	4.14911	-0.0349402		6.01204	4.17558	-0.0139415		6.01204	4.17737	-0.00256896		6.01204	4.19325	0.0425637		6.01204	4.16232	-0.0286162		6.01204	4.18305	-0.000154972		6.01204	4.16824	-0.0181377		6.01204	4.21565	-0.0254035
6.01924	4.16046	-0.0365078		6.01924	4.19397	0.0115037		6.01924	4.18671	0.0169456		6.01924	4.14701	-0.0370383		6.01924	4.1743	-0.0152171		6.01924	4.17774	-0.00219941		6.01924	4.19463	0.0439405		6.01924	4.16488	-0.0260592		6.01924	4.18255	-0.000649691		6.01924	4.16903	-0.017345		6.01924	4.2203	-0.0207543
6.02644	4.16025	-0.0367224		6.02644	4.19058	0.00811219		6.02644	4.18597	0.0162005		6.02644	4.14585	-0.0381947		6.02644	4.17428	-0.0152409		6.02644	4.1791	-0.000846386		6.02644	4.19558	0.0448883		6.02644	4.1678	-0.0231385		6.02644	4.18246	-0.000745058		6.02644	4.16974	-0.0166416		6.02644	4.22431	-0.0167489
6.03364	4.1608	-0.0361681		6.03364	4.18681	0.00434518		6.03364	4.18544	0.015676		6.03364	4.14589	-0.0381589		6.03364	4.17561	-0.0139117		6.03364	4.18107	0.00112653		6.03364	4.19607	0.045377		6.03364	4.17109	-0.0198543		6.03364	4.18296	-0.000238419		6.03364	4.17032	-0.0160575		6.03364	4.22748	-0.013572
6.04084	4.16215	-0.034821		6.04084	4.18297	0.000506639		6.04084	4.18518	0.0154078		6.04084	4.14733	-0.0367224		6.04084	4.17822	-0.011301		6.04084	4.18327	0.0033319		6.04084	4.19616	0.0454664		6.04084	4.17482	-0.0161171		6.04084	4.18416	0.000959635		6.04084	4.17071	-0.0156701		6.04084	4.22975	-0.011301
6.04804	4.16417	-0.0328064		6.04804	4.17938	-0.00308156		6.04804	4.18517	0.0154018		6.04804	4.15022	-0.0338256		6.04804	4.18188	-0.00764132		6.04804	4.18537	0.00542998		6.04804	4.19589	0.0451982		6.04804	4.17906	-0.0118792		6.04804	4.18606	0.00286102		6.04804	4.17086	-0.0155151		6.04804	4.23119	-0.00986457
6.05524	4.16656	-0.0304103		6.05524	4.17631	-0.0061512		6.05524	4.18534	0.0155687		6.05524	4.15449	-0.0295579		6.05524	4.18607	-0.00345111		6.05524	4.18715	0.0072062		6.05524	4.19533	0.0446439		6.05524	4.18376	-0.00718236		6.05524	4.18848	0.00528097		6.05524	4.17086	-0.0155151		6.05524	4.23196	-0.00909567
6.06244	4.16904	-0.0279307		6.06244	4.17392	-0.00854135		6.06244	4.18553	0.0157654		6.06244	4.15983	-0.0242233		6.06244	4.19011	0.000590086		6.06244	4.18851	0.00857115		6.06244	4.19452	0.0438273		6.06244	4.18875	-0.00219345		6.06244	4.19099	0.00779033		6.06244	4.17086	-0.015521		6.06244	4.23228	-0.00877976
6.06964	4.17138	-0.0255942		6.06964	4.1723	-0.0101686		6.06964	4.18565	0.0158846		6.06964	4.16578	-0.0182688		6.06964	4.19331	0.00379086		6.06964	4.18949	0.0095427		6.06964	4.1935	0.042814		6.06964	4.19376	0.0028193		6.06964	4.19308	0.00987649		6.06964	4.17106	-0.0153244		6.06964	4.23233	-0.00872612
6.07684	4.17352	-0.0234485		6.07684	4.17147	-0.0109971		6.07684	4.1858	0.0160277		6.07684	4.17174	-0.0123143		6.07684	4.1952	0.00567436		6.07684	4.19017	0.0102282		6.07684	4.19235	0.0416636		6.07684	4.19843	0.0074923		6.07684	4.19431	0.0111103		6.07684	4.17165	-0.0147343		6.07684	4.23228	-0.00877976
6.08404	4.17543	-0.0215411		6.08404	4.17147	-0.0109911		6.08404	4.18618	0.0164092		6.08404	4.177	-0.00705123		6.08404	4.19558	0.00605583		6.08404	4.19074	0.0107944		6.08404	4.19109	0.040406		6.08404	4.20231	0.0113726		6.08404	4.19449	0.0112832		6.08404	4.17281	-0.013572		6.08404	4.23226	-0.00879765
6.09124	4.17705	-0.0199258		6.09124	4.17229	-0.0101745		6.09124	4.18699	0.0172257		6.09124	4.18097	-0.0030756		6.09124	4.19456	0.00504255		6.09124	4.19134	0.0113964		6.09124	4.18973	0.039041		6.09124	4.20493	0.0139892		6.09124	4.1936	0.0103951		6.09124	4.17467	-0.0117064		6.09124	4.23244	-0.00861883
6.09844	4.17833	-0.0186384		6.09844	4.17385	-0.00861883		6.09844	4.18826	0.0184953		6.09844	4.18327	-0.000780821		6.09844	4.19244	0.00292063		6.09844	4.19207	0.0121295		6.09844	4.18831	0.0376165		6.09844	4.20595	0.0150144		6.09844	4.19183	0.00863075		6.09844	4.17727	-0.00910759		6.09844	4.23294	-0.00811815
6.10564	4.17936	-0.0176132		6.10564	4.17604	-0.00642538		6.10564	4.18981	0.0200391		6.10564	4.18377	-0.000280142		6.10564	4.18966	0.000137091		6.10564	4.19295	0.0130117		6.10564	4.18684	0.0361502		6.10564	4.20538	0.0144422		6.10564	4.18946	0.00625849		6.10564	4.1805	-0.00587702		6.10564	4.23375	-0.00730157
6.11284	4.18031	-0.0166595		6.11284	4.17877	-0.00369549		6.11284	4.1914	0.0216365		6.11284	4.18261	-0.00144243		6.11284	4.18678	-0.00274181		6.11284	4.19393	0.0139892		6.11284	4.18536	0.034672		6.11284	4.20353	0.0125885		6.11284	4.1869	0.00369549		6.11284	4.18417	-0.00221133		6.11284	4.2348	-0.00625253
6.12004	4.18137	-0.0155985		6.12004	4.18189	-0.000578165		6.12004	4.19284	0.023067		6.12004	4.18018	-0.00386834		6.12004	4.18442	-0.00510216		6.12004	4.19492	0.0149727		6.12004	4.18389	0.0332057		6.12004	4.20094	0.0099957		6.12004	4.18463	0.00142455		6.12004	4.18805	0.00167489		6.12004	4.236	-0.00505447
6.12724	4.18255	-0.0144243		6.12724	4.18522	0.00275373		6.12724	4.19395	0.0241816		6.12724	4.17708	-0.00696778		6.12724	4.18311	-0.00641346		6.12724	4.19586	0.0159204		6.12724	4.18246	0.0317752		6.12724	4.19815	0.0072062		6.12724	4.18314	-5.96046e-05		6.12724	4.19195	0.00556707		6.12724	4.23728	-0.00377893
6.13444	4.18367	-0.0132978		6.13444	4.18852	0.00605583		6.13444	4.19457	0.0248015		6.13444	4.17398	-0.0100672		6.13444	4.18315	-0.00637174		6.13444	4.19674	0.0167966		6.13444	4.18116	0.0304699		6.13444	4.1956	0.00466108		6.13444	4.18273	-0.000476837		6.13444	4.1957	0.00932217		6.13444	4.23857	-0.00248551
6.14164	4.18449	-0.0124812		6.14164	4.19153	0.00906587		6.14164	4.1945	0.0247359		6.14164	4.1715	-0.0125527		6.14164	4.18448	-0.00504255		6.14164	4.19757	0.0176251		6.14164	4.18009	0.029403		6.14164	4.19364	0.00270009		6.14164	4.18347	0.00026226		6.14164	4.1992	0.012821		6.14164	4.23983	-0.00122786
6.14884	4.18478	-0.0121951		6.14884	4.19399	0.0115275		6.14884	4.1936	0.0238299		6.14884	4.16996	-0.0140905		6.14884	4.18671	-0.00280738		6.14884	4.19837	0.0184238		6.14884	4.17939	0.0286996		6.14884	4.19249	0.00154972		6.14884	4.18523	0.00202656		6.14884	4.20237	0.015986		6.14884	4.241	-5.36442e-05
6.15604	4.18432	-0.0126481		6.15604	4.19573	0.013268		6.15604	4.19186	0.0220895		6.15604	4.16946	-0.0145912		6.15604	4.18927	-0.00025034		6.15604	4.19922	0.0192821		6.15604	4.17909	0.0284016		6.15604	4.19225	0.00130534		6.15604	4.18782	0.00461936		6.15604	4.20519	0.0188053		6.15604	4.24206	0.00100136
6.16324	4.18299	-0.0139832		6.16324	4.19668	0.0142157		6.16324	4.18948	0.0197113		6.16324	4.16988	-0.014174		6.16324	4.19158	0.00205636		6.16324	4.20016	0.0202179		6.16324	4.17915	0.0284612		6.16324	4.19284	0.00190139		6.16324	4.19102	0.00782013		6.16324	4.20768	0.0212967		6.16324	4.24303	0.00197887
6.17044	4.18071	-0.0162661		6.17044	4.19685	0.0143826		6.17044	4.1868	0.017029		6.17044	4.17096	-0.0130892		6.17044	4.19325	0.00372529		6.17044	4.2012	0.021255		6.17044	4.17947	0.0287831		6.17044	4.19405	0.0031054		6.17044	4.19456	0.0113606		6.17044	4.20989	0.023514		6.17044	4.24398	0.00292659
6.17764	4.17761	-0.0193596		6.17764	4.19634	0.013876		6.17764	4.18416	0.0143945		6.17764	4.17238	-0.0116646		6.17764	4.19407	0.00454783		6.17764	4.20226	0.0223219		6.17764	4.17993	0.029242		6.17764	4.19554	0.00460148		6.17764	4.19813	0.014931		6.17764	4.21181	0.0254333		6.17764	4.24502	0.00396371
6.18484	4.17412	-0.0228524		6.18484	4.19534	0.0128746		6.18484	4.18184	0.0120759		6.18484	4.17381	-0.0102401		6.18484	4.19402	0.00449419		6.18484	4.20336	0.0234127		6.18484	4.18043	0.0297368		6.18484	4.19706	0.0061214		6.18484	4.2014	0.0181973		6.18484	4.21332	0.0269353		6.18484	4.2463	0.00524521
6.19204	4.17081	-0.0261605		6.19204	4.19407	0.011611		6.19204	4.18001	0.0102401		6.19204	4.17497	-0.00907779		6.19204	4.19322	0.00370145		6.19204	4.20449	0.0245452		6.19204	4.18089	0.0302017		6.19204	4.1984	0.0074625		6.19204	4.20407	0.0208676		6.19204	4.21427	0.027895		6.19204	4.24799	0.00693798
6.19924	4.16824	-0.0287354		6.19924	4.19275	0.0102878		6.19924	4.17877	0.0090003		6.19924	4.17579	-0.00825524		6.19924	4.19198	0.00246167		6.19924	4.20577	0.0258267		6.19924	4.18128	0.0305891		6.19924	4.19942	0.00847578		6.19924	4.20592	0.0227213		6.19924	4.21469	0.0283062		6.19924	4.25029	0.00923276
6.20644	4.16676	-0.0302136		6.20644	4.1915	0.00903606		6.20644	4.17821	0.00844002		6.20644	4.17629	-0.00776053		6.20644	4.19079	0.00126958		6.20644	4.20725	0.0273049		6.20644	4.18159	0.030899		6.20644	4.19996	0.00902414		6.20644	4.20684	0.0236332		6.20644	4.21467	0.0282943		6.20644	4.25334	0.0122845
6.21364	4.16655	-0.0304222		6.21364	4.19037	0.00790358		6.21364	4.17831	0.00854135		6.21364	4.17656	-0.0074923		6.21364	4.19011	0.000584126		6.21364	4.20888	0.0289381		6.21364	4.18186	0.0311732		6.21364	4.19997	0.0090301		6.21364	4.20675	0.0235498		6.21364	4.21446	0.0280797		6.21364	4.25721	0.0161588
6.22084	4.16761	-0.0293612		6.22084	4.18942	0.00695586		6.22084	4.17897	0.009197		6.22084	4.17672	-0.00733137		6.22084	4.19019	0.000667572		6.22084	4.21054	0.0305951		6.22084	4.18221	0.0315249		6.22084	4.19946	0.0085175		6.22084	4.2057	0.0225008		6.22084	4.21421	0.0278294		6.22084	4.26188	0.0208259
6.22804	4.1698	-0.0271678		6.22804	4.18873	0.00627041		6.22804	4.17994	0.0101745		6.22804	4.1769	-0.0071466		6.22804	4.19099	0.00146627		6.22804	4.21212	0.0321746		6.22804	4.18286	0.0321686		6.22804	4.19857	0.00762939		6.22804	4.20386	0.020653		6.22804	4.21411	0.0277281		6.22804	4.26713	0.0260711
6.23524	4.17277	-0.0242054		6.23524	4.18843	0.00596642		6.23524	4.18094	0.0111699		6.23524	4.17728	-0.00676513		6.23524	4.1922	0.00268221		6.23524	4.21357	0.0336289		6.23524	4.18404	0.0333548		6.23524	4.19753	0.00658631		6.23524	4.20152	0.0183165		6.23524	4.21439	0.0280142		6.23524	4.27255	0.0314951
6.24244	4.17594	-0.0210285		6.24244	4.18853	0.00606775		6.24244	4.18168	0.011915		6.24244	4.17796	-0.0060916		6.24244	4.19351	0.00399351		6.24244	4.21482	0.0348747		6.24244	4.18602	0.0353277		6.24244	4.19655	0.00561476		6.24244	4.19913	0.0159264		6.24244	4.21538	0.0290036		6.24244	4.27766	0.0366092
6.24964	4.1787	-0.0182748		6.24964	4.18903	0.00656843		6.24964	4.18203	0.0122607		6.24964	4.17879	-0.00526309		6.24964	4.19472	0.00520349		6.24964	4.21569	0.0357509		6.24964	4.18885	0.0381649		6.24964	4.19586	0.00491738		6.24964	4.19713	0.0139296		6.24964	4.21734	0.0309646		6.24964	4.28202	0.0409663
6.25684	4.18061	-0.0163615		6.25684	4.18991	0.00745058		6.25684	4.18195	0.0121772		6.25684	4.17957	-0.00448227		6.25684	4.1957	0.006181		6.25684	4.21599	0.0360489		6.25684	4.19244	0.0417471		6.25684	4.19554	0.00460148		6.25684	4.1959	0.0127017		6.25684	4.22033	0.0339508		6.25684	4.28537	0.0443101
6.26404	4.18149	-0.0154853		6.26404	4.19122	0.00875592		6.26404	4.18152	0.0117481		6.26404	4.18009	-0.00395775		6.26404	4.19633	0.00681281		6.26404	4.21554	0.0356019		6.26404	4.19649	0.0458002		6.26404	4.19567	0.00472665		6.26404	4.1957	0.0124931		6.26404	4.22419	0.0378132		6.26404	4.28766	0.0466049
6.27124	4.18143	-0.0155449		6.27124	4.19297	0.0105083		6.27124	4.18087	0.0111043		6.27124	4.18025	-0.00379682		6.27124	4.19651	0.00698566		6.27124	4.21433	0.0343859		6.27124	4.20063	0.0499368		6.27124	4.1962	0.00526309		6.27124	4.19662	0.013417		6.27124	4.22865	0.0422716		6.27124	4.28911	0.0480592
6.27844	4.18061	-0.0163615		6.27844	4.19509	0.0126302		6.27844	4.18018	0.010407		6.27844	4.17997	-0.00407696		6.27844	4.19632	0.00679493		6.27844	4.21245	0.0325084		6.27844	4.20446	0.0537693		6.27844	4.19708	0.00613928		6.27844	4.19862	0.0154197		6.27844	4.23345	0.0470698		6.27844	4.29004	0.0489891
6.28564	4.17928	-0.0176907		6.28564	4.19737	0.0149012		6.28564	4.17956	0.00979304		6.28564	4.17917	-0.00487566		6.28564	4.19608	0.00655651		6.28564	4.21001	0.0300646		6.28564	4.20765	0.0569582		6.28564	4.19818	0.007236		6.28564	4.20145	0.018245		6.28564	4.23834	0.0519633		6.28564	4.29082	0.0497639
6.29284	4.17782	-0.019151		6.29284	4.19954	0.0170767		6.29284	4.17912	0.00935197		6.29284	4.1778	-0.00625253		6.29284	4.19624	0.0067234		6.29284	4.2071	0.0271559		6.29284	4.20992	0.0592351		6.29284	4.19934	0.00839829		6.29284	4.20467	0.0214696		6.29284	4.24302	0.0566423		6.29284	4.29175	0.0506997
6.30004	4.17675	-0.0202179		6.30004	4.20151	0.0190437		6.30004	4.1788	0.00903606		6.30004	4.17601	-0.00804067		6.30004	4.19711	0.00758767		6.30004	4.20387	0.0239253		6.30004	4.21119	0.0605047		6.30004	4.2005	0.00956059		6.30004	4.20781	0.0246108		6.30004	4.24709	0.0607073		6.30004	4.29312	0.0520647
6.30724	4.17654	-0.0204325		6.30724	4.20323	0.0207663		6.30724	4.1785	0.00873208		6.30724	4.17416	-0.00988841		6.30724	4.19867	0.00914931		6.30724	4.2006	0.020653		6.30724	4.21154	0.0608563		6.30724	4.20166	0.0107229		6.30724	4.21045	0.0272512		6.30724	4.25015	0.063771		6.30724	4.29508	0.0540257
6.31444	4.17746	-0.0195086		6.31444	4.20468	0.0222147		6.31444	4.17803	0.0082612		6.31444	4.17271	-0.0113368		6.31444	4.20077	0.0112534		6.31444	4.19761	0.0176668		6.31444	4.21128	0.0605881		6.31444	4.20294	0.0120044		6.31444	4.2124	0.0291944		6.31444	4.25188	0.0654995		6.31444	4.29773	0.0566721
6.32164	4.17951	-0.0174642		6.32164	4.20577	0.0233054		6.32164	4.17722	0.00745654		6.32164	4.17195	-0.0120997		6.32164	4.2033	0.0137806		6.32164	4.19526	0.0153184		6.32164	4.21081	0.0601232		6.32164	4.2045	0.0135601		6.32164	4.21363	0.0304222		6.32164	4.25221	0.0658333		6.32164	4.30102	0.0599682
6.32884	4.18243	-0.0145435		6.32884	4.20645	0.0239849		6.32884	4.17592	0.0061512		6.32884	4.17202	-0.0120282		6.32884	4.20623	0.0167072		6.32884	4.19382	0.013876		6.32884	4.21056	0.0598729		6.32884	4.20639	0.0154495		6.32884	4.21426	0.03106		6.32884	4.25125	0.0648677		6.32884	4.30486	0.0638008
6.33604	4.1858	-0.0111759		6.33604	4.20678	0.0243127		6.33604	4.174	0.00423193		6.33604	4.17295	-0.0111043		6.33604	4.20948	0.0199556		6.33604	4.19343	0.0134826		6.33604	4.21078	0.0600934		6.33604	4.20858	0.017637		6.33604	4.21451	0.0313044		6.33604	4.24918	0.0627995		6.33604	4.30907	0.0680149
6.34324	4.18915	-0.00782609		6.34324	4.20686	0.0243962		6.34324	4.17146	0.00169277		6.34324	4.1747	-0.00935197		6.34324	4.21288	0.0233591		6.34324	4.19409	0.0141501		6.34324	4.21151	0.0608206		6.34324	4.21103	0.0200868		6.34324	4.21465	0.0314474		6.34324	4.24631	0.0599265		6.34324	4.31358	0.0725269
6.35044	4.19198	-0.00498891		6.35044	4.20678	0.0243187		6.35044	4.1685	-0.00126958		6.35044	4.17715	-0.00690222		6.35044	4.2162	0.026679		6.35044	4.19566	0.0157177		6.35044	4.21252	0.0618279		6.35044	4.21368	0.0227392		6.35044	4.21503	0.0318289		6.35044	4.243	0.0566244		6.35044	4.31838	0.0773251
6.35764	4.1939	-0.00306964		6.35764	4.20654	0.0240803		6.35764	4.16548	-0.00428557		6.35764	4.17997	-0.00407696		6.35764	4.21932	0.0298023		6.35764	4.19781	0.0178635		6.35764	4.21349	0.0628054		6.35764	4.21647	0.0255287		6.35764	4.21597	0.0327647		6.35764	4.23976	0.0533819		6.35764	4.32343	0.0823736
6.36484	4.19462	-0.00234842		6.36484	4.20612	0.0236571		6.36484	4.16282	-0.0069499		6.36484	4.18274	-0.00130534		6.36484	4.22235	0.0328243		6.36484	4.20014	0.0201941		6.36484	4.21409	0.0634015		6.36484	4.2192	0.0282645		6.36484	4.21762	0.0344217		6.36484	4.23723	0.0508487		6.36484	4.32853	0.0874758
6.37204	4.19405	-0.00292659		6.37204	4.20551	0.0230432		6.37204	4.16082	-0.00895262		6.37204	4.1851	0.00104904		6.37204	4.22539	0.0358641		6.37204	4.20226	0.0223219		6.37204	4.21405	0.0633657		6.37204	4.22159	0.0306487		6.37204	4.21995	0.0367463		6.37204	4.23598	0.049597		6.37204	4.33333	0.092274
6.37924	4.19226	-0.00470877		6.37924	4.20476	0.0222981		6.37924	4.15966	-0.0101089		6.37924	4.18692	0.00287294		6.37924	4.22842	0.038898		6.37924	4.20384	0.0238955		6.37924	4.21324	0.0625551		6.37924	4.22335	0.032407		6.37924	4.22273	0.0395238		6.37924	4.23639	0.0500143		6.37924	4.33748	0.0964284
6.38644	4.18957	-0.00739694		6.38644	4.20389	0.0214279		6.38644	4.15953	-0.0102401		6.38644	4.18824	0.00419021		6.38644	4.23126	0.0417411		6.38644	4.20461	0.0246644		6.38644	4.21169	0.0609994		6.38644	4.22429	0.0333548		6.38644	4.22556	0.042361		6.38644	4.23853	0.0521481		6.38644	4.3408	0.0997484
6.39364	4.18642	-0.010556		6.39364	4.20284	0.0203788		6.39364	4.1606	-0.00916719		6.39364	4.18912	0.00507236		6.39364	4.23371	0.0441849		6.39364	4.20445	0.0245035		6.39364	4.20962	0.0589311		6.39364	4.22447	0.0335336		6.39364	4.22807	0.0448644		6.39364	4.24218	0.0558019		6.39364	4.3433	0.10224
6.40084	4.18329	-0.0136793		6.40084	4.20162	0.0191569		6.40084	4.16295	-0.00681877		6.40084	4.18959	0.00553727		6.40084	4.23568	0.0461578		6.40084	4.20343	0.0234842		6.40084	4.20748	0.0567913		6.40084	4.224	0.0330567		6.40084	4.22984	0.0466347		6.40084	4.24701	0.0606298		6.40084	4.34506	0.104004
6.40804	4.18059	-0.0163853		6.40804	4.20029	0.0178218		6.40804	4.16644	-0.0033319		6.40804	4.1897	0.00565052		6.40804	4.23723	0.0477076		6.40804	4.20186	0.0219166		6.40804	4.20581	0.0551164		6.40804	4.22303	0.0320911		6.40804	4.2306	0.0473976		6.40804	4.25267	0.0662863		6.40804	4.34628	0.105226
6.41524	4.17849	-0.0184834		6.41524	4.19898	0.0165164		6.41524	4.17069	0.000923872		6.41524	4.18962	0.00556707		6.41524	4.23839	0.0488698		6.41524	4.20021	0.0202656		6.41524	4.20505	0.0543654		6.41524	4.22173	0.0307918		6.41524	4.2302	0.0469923		6.41524	4.25869	0.0723124		6.41524	4.34719	0.106132
6.42244	4.17702	-0.0199497		6.42244	4.19785	0.0153899		6.42244	4.17527	0.00550151		6.42244	4.18959	0.00554323		6.42244	4.23909	0.0495732		6.42244	4.19897	0.0190318		6.42244	4.20547	0.0547826		6.42244	4.22028	0.0293374		6.42244	4.22871	0.0455022		6.42244	4.26451	0.0781298		6.42244	4.34811	0.107056
6.42964	4.17615	-0.0208199		6.42964	4.19706	0.0145912		6.42964	4.17982	0.0100493		6.42964	4.18975	0.0056982		6.42964	4.23925	0.0497282		6.42964	4.19853	0.0185907		6.42964	4.20717	0.0564814		6.42964	4.21887	0.0279307		6.42964	4.2264	0.0432014		6.42964	4.26953	0.0831544		6.42964	4.34935	0.108296
6.43684	4.17588	-0.0210941		6.43684	4.19668	0.0142157		6.43684	4.18407	0.0142992		6.43684	4.19007	0.00602007		6.43684	4.23889	0.0493646		6.43684	4.19912	0.0191748		6.43684	4.21011	0.0594199		6.43684	4.21769	0.0267506		6.43684	4.22376	0.040561		6.43684	4.27336	0.0869811		6.43684	4.35107	0.110012
6.44404	4.17612	-0.0208497		6.44404	4.19685	0.0143886		6.44404	4.1877	0.0179291		6.44404	4.19042	0.00637174		6.44404	4.23814	0.0486195		6.44404	4.2008	0.0208616		6.44404	4.2141	0.0634134		6.44404	4.21682	0.0258803		6.44404	4.22131	0.0381052		6.44404	4.27594	0.0895619		6.44404	4.35317	0.112116
6.45124	4.17672	-0.0202477		6.45124	4.19767	0.0152111		6.45124	4.1904	0.0206292		6.45124	4.19072	0.00666976		6.45124	4.23722	0.0476956		6.45124	4.20349	0.0235438		6.45124	4.21872	0.0680268		6.45124	4.21627	0.025332		6.45124	4.21953	0.036329		6.45124	4.27748	0.0910997		6.45124	4.35547	0.114411
6.45844	4.17745	-0.0195205		6.45844	4.19912	0.0166535		6.45844	4.19185	0.0220776		6.45844	4.19095	0.00689626		6.45844	4.23621	0.0466883		6.45844	4.20689	0.0269473		6.45844	4.22333	0.0726402		6.45844	4.21595	0.0250101		6.45844	4.21879	0.035584		6.45844	4.27822	0.0918388		6.45844	4.35768	0.116628
6.46564	4.17807	-0.0189006		6.46564	4.20101	0.018549		6.46564	4.19194	0.0221729		6.46564	4.19109	0.00703931		6.46564	4.23511	0.0455856		6.46564	4.21063	0.0306904		6.46564	4.22736	0.0766754		6.46564	4.21581	0.0248671		6.46564	4.21922	0.0360131		6.46564	4.27836	0.0919759		6.46564	4.35961	0.118554
6.47284	4.17843	-0.018537		6.47284	4.20309	0.0206292		6.47284	4.19071	0.0209451		6.47284	4.19108	0.00703335		6.47284	4.23388	0.0443578		6.47284	4.21427	0.0343263		6.47284	4.23044	0.079751		6.47284	4.21584	0.0249028		6.47284	4.22076	0.0375569		6.47284	4.27803	0.0916481		6.47284	4.36104	0.119984
6.48004	4.17846	-0.0185072		6.48004	4.20502	0.0225604		6.48004	4.18832	0.0185549		6.48004	4.19082	0.00677109		6.48004	4.23253	0.0430048		6.48004	4.21746	0.0375211		6.48004	4.23236	0.0816762		6.48004	4.21619	0.0252485		6.48004	4.22317	0.0399649		6.48004	4.27751	0.0911295		6.48004	4.36181	0.120759
6.48724	4.17808	-0.0188887		6.48724	4.20649	0.0240266		6.48724	4.18488	0.0151157		6.48724	4.19022	0.00617504		6.48724	4.2311	0.0415742		6.48724	4.21999	0.0400484		6.48724	4.23303	0.0823438		6.48724	4.21703	0.026089		6.48724	4.2261	0.0428975		6.48724	4.2771	0.0907242		6.48724	4.36186	0.120807
6.49444	4.17721	-0.0197589		6.49444	4.20723	0.0247657		6.49444	4.18063	0.0108659		6.49444	4.18928	0.00523329		6.49444	4.22962	0.040102		6.49444	4.22182	0.0418782		6.49444	4.23234	0.0816524		6.49444	4.21852	0.0275791		6.49444	4.22923	0.0460267		6.49444	4.27703	0.0906527		6.49444	4.36129	0.120234
6.50164	4.17585	-0.0211239		6.50164	4.20705	0.0245869		6.50164	4.1759	0.00612736		6.50164	4.18802	0.00396967		6.50164	4.22811	0.038588		6.50164	4.22308	0.0431359		6.50164	4.23032	0.0796318		6.50164	4.22071	0.0297725		6.50164	4.23234	0.0491381		6.50164	4.27727	0.0908911		6.50164	4.36026	0.119209
6.50884	4.1741	-0.0228703		6.50884	4.20592	0.0234544		6.50884	4.17114	0.00137091		6.50884	4.18649	0.00244379		6.50884	4.22654	0.0370204		6.50884	4.22395	0.0440061		6.50884	4.2273	0.0766098		6.50884	4.22344	0.0325024		6.50884	4.23533	0.0521302		6.50884	4.27765	0.0912666		6.50884	4.35902	0.117964
6.51604	4.17221	-0.0247598		6.51604	4.20396	0.0214994		6.51604	4.16682	-0.00294447		6.51604	4.1848	0.000751018		6.51604	4.22501	0.0354886		6.51604	4.22459	0.0446498		6.51604	4.2238	0.0731111		6.51604	4.22636	0.035423		6.51604	4.23819	0.0549853		6.51604	4.27797	0.0915945		6.51604	4.35771	0.116652
6.52324	4.17047	-0.0265002		6.52324	4.20145	0.01899		6.52324	4.16335	-0.00641942		6.52324	4.18305	-0.000995398		6.52324	4.22363	0.0341117		6.52324	4.22504	0.0450969		6.52324	4.22041	0.0697255		6.52324	4.22902	0.0380754		6.52324	4.24087	0.0576675		6.52324	4.27808	0.0917017		6.52324	4.35641	0.115359
6.53044	4.16914	-0.0278294		6.53044	4.19874	0.0162721		6.53044	4.16107	-0.00870228		6.53044	4.18134	-0.00270605		6.53044	4.22255	0.0330269		6.53044	4.22518	0.0452399		6.53044	4.21755	0.0668645		6.53044	4.23095	0.0400066		6.53044	4.24334	0.0601411		6.53044	4.27779	0.0914097		6.53044	4.35521	0.114155
6.53764	4.16838	-0.0285923		6.53764	4.19614	0.0136793		6.53764	4.16025	-0.00951886		6.53764	4.1797	-0.00435114		6.53764	4.22187	0.0323534		6.53764	4.22488	0.0449359		6.53764	4.21547	0.0647843		6.53764	4.23179	0.0408471		6.53764	4.24557	0.0623643		6.53764	4.27685	0.0904739		6.53764	4.35409	0.113034
6.54484	4.16828	-0.0286937		6.54484	4.19392	0.011456		6.54484	4.16113	-0.00863671		6.54484	4.17815	-0.00590086		6.54484	4.2217	0.0321746		6.54484	4.22398	0.0440419		6.54484	4.21433	0.0636458		6.54484	4.23134	0.0404		6.54484	4.24752	0.0643134		6.54484	4.2751	0.0887156		6.54484	4.35306	0.112009
6.55204	4.16886	-0.0281096		6.55204	4.19223	0.0097692		6.55204	4.16378	-0.00599027		6.55204	4.17674	-0.00730753		6.55204	4.22198	0.0324607		6.55204	4.22243	0.0424922		6.55204	4.21421	0.0635207		6.55204	4.22954	0.0386		6.55204	4.24913	0.0659287		6.55204	4.27246	0.086081		6.55204	4.35216	0.111109
6.55924	4.17013	-0.02684		6.55924	4.19116	0.00869632		6.55924	4.16802	-0.00174642		6.55924	4.1756	-0.00845194		6.55924	4.22261	0.0330925		6.55924	4.22025	0.0403047		6.55924	4.21503	0.0643432		6.55924	4.22657	0.0356317		6.55924	4.25026	0.0670552		6.55924	4.26912	0.0827372		6.55924	4.35144	0.110382
6.56644	4.17201	-0.0249624		6.56644	4.19064	0.00817776		6.56644	4.17348	0.00371337		6.56644	4.1748	-0.00925064		6.56644	4.22335	0.0338256		6.56644	4.21751	0.0375628		6.56644	4.21657	0.065881		6.56644	4.22283	0.0318944		6.56644	4.25074	0.067538		6.56644	4.26542	0.0790358		6.56644	4.35099	0.109935
6.57364	4.17437	-0.0226021		6.57364	4.19053	0.00806451		6.57364	4.17968	0.00991225		6.57364	4.17442	-0.00962615		6.57364	4.22384	0.0343144		6.57364	4.21447	0.034523		6.57364	4.21844	0.0677526		6.57364	4.21891	0.0279725		6.57364	4.25051	0.0673056		6.57364	4.2618	0.0754237		6.57364	4.35092	0.109863
6.58084	4.17702	-0.0199497		6.58084	4.19065	0.00818372		6.58084	4.18612	0.0163496		6.58084	4.17446	-0.00958443		6.58084	4.22379	0.0342667		6.58084	4.21149	0.0315428		6.58084	4.22022	0.0695348		6.58084	4.21535	0.0244081		6.58084	4.24966	0.0664592		6.58084	4.25879	0.0724077		6.58084	4.35135	0.110298
6.58804	4.17977	-0.0172019		6.58804	4.19082	0.00835657		6.58804	4.19226	0.0224948		6.58804	4.17498	-0.00907183		6.58804	4.22295	0.0334322		6.58804	4.20896	0.0290215		6.58804	4.22154	0.070852		6.58804	4.21252	0.0215769		6.58804	4.2484	0.0652015		6.58804	4.2568	0.0704169		6.58804	4.35241	0.111353
6.59524	4.1824	-0.0145674		6.59524	4.19098	0.00851154		6.59524	4.19756	0.0277936		6.59524	4.17605	-0.00799894		6.59524	4.22117	0.0316501		6.59524	4.20721	0.0272632		6.59524	4.22214	0.071454		6.59524	4.21055	0.0196099		6.59524	4.24694	0.0637412		6.59524	4.25613	0.0697494		6.59524	4.35408	0.113022
6.60244	4.18467	-0.0123024		6.60244	4.19108	0.00861883		6.60244	4.2015	0.0317276		6.60244	4.17775	-0.00630021		6.60244	4.21842	0.0288963		6.60244	4.20635	0.0264049		6.60244	4.22196	0.0712752		6.60244	4.20941	0.0184655		6.60244	4.24541	0.0622034		6.60244	4.2569	0.0705183		6.60244	4.35619	0.115132
6.60964	4.1863	-0.0106692		6.60964	4.19111	0.00864863		6.60964	4.20369	0.033921		6.60964	4.18004	-0.00400543		6.60964	4.21479	0.0252664		6.60964	4.20635	0.0264108		6.60964	4.22114	0.0704527		6.60964	4.20901	0.0180721		6.60964	4.24386	0.0606596		6.60964	4.259	0.0726223		6.60964	4.3584	0.11735
6.61684	4.18705	-0.00991821		6.61684	4.19095	0.00848174		6.61684	4.20406	0.0342965		6.61684	4.18282	-0.00123382		6.61684	4.21058	0.0210583		6.61684	4.20712	0.0271797		6.61684	4.21992	0.0692308		6.61684	4.20929	0.0183463		6.61684	4.2424	0.0591934		6.61684	4.26212	0.0757396		6.61684	4.36029	0.119233
6.62404	4.18684	-0.0101328		6.62404	4.19047	0.00801086		6.62404	4.20282	0.0330508		6.62404	4.18576	0.00171065		6.62404	4.20625	0.0167251		6.62404	4.20849	0.0285447		6.62404	4.21853	0.067842		6.62404	4.21023	0.0192881		6.62404	4.24111	0.0579059		6.62404	4.26576	0.0793755		6.62404	4.3614	0.120342
6.63124	4.18575	-0.0112176		6.63124	4.18963	0.00717044		6.63124	4.20035	0.0305772		6.63124	4.18853	0.00448227		6.63124	4.20228	0.0127614		6.63124	4.21028	0.0303328		6.63124	4.21714	0.0664532		6.63124	4.2119	0.020963		6.63124	4.24011	0.0569046		6.63124	4.26926	0.0828803		6.63124	4.36144	0.120384
6.63844	4.18403	-0.0129402		6.63844	4.18846	0.00599623		6.63844	4.19711	0.0273466		6.63844	4.19078	0.00672936		6.63844	4.19908	0.00955462		6.63844	4.2123	0.0323594		6.63844	4.21585	0.0651598		6.63844	4.21442	0.0234842		6.63844	4.23942	0.0562131		6.63844	4.27204	0.0856578		6.63844	4.36028	0.119221
6.64564	4.18202	-0.0149548		6.64564	4.18707	0.00460148		6.64564	4.19367	0.0239015		6.64564	4.19222	0.00816584		6.64564	4.19688	0.00736117		6.64564	4.21437	0.0344276		6.64564	4.2147	0.0640094		6.64564	4.21797	0.0270307		6.64564	4.23902	0.0558197		6.64564	4.27363	0.0872493		6.64564	4.35795	0.116897
6.65284	4.18004	-0.0169277		6.65284	4.18558	0.00311136		6.65284	4.19061	0.0208437		6.65284	4.19268	0.00863075		6.65284	4.1958	0.00627637		6.65284	4.21624	0.0362933		6.65284	4.21371	0.063026		6.65284	4.22267	0.0317335		6.65284	4.2389	0.0556946		6.65284	4.2738	0.0874162		6.65284	4.35465	0.113595
6.66004	4.17844	-0.0185311		6.66004	4.18417	0.00170469		6.66004	4.18848	0.0187159		6.66004	4.19211	0.00806451		6.66004	4.19583	0.00631213		6.66004	4.21769	0.0377476		6.66004	4.21285	0.0621617		6.66004	4.22848	0.037545		6.66004	4.23914	0.055933		6.66004	4.27251	0.0861287		6.66004	4.3507	0.109643
6.66724	4.17745	-0.0195265		6.66724	4.18307	0.000602007		6.66724	4.18761	0.0178397		6.66724	4.1905	0.00645518		6.66724	4.19691	0.00739098		6.66724	4.21857	0.0386298		6.66724	4.212	0.0613093		6.66724	4.23508	0.0441432		6.66724	4.23988	0.0566721		6.66724	4.26998	0.0835955		6.66724	4.34655	0.105494
6.67444	4.17707	-0.019902		6.67444	4.18248	1.19209e-05		6.67444	4.18802	0.0182509		6.67444	4.18799	0.00393987		6.67444	4.19882	0.00929832		6.67444	4.21883	0.0388861		6.67444	4.21107	0.0603795		6.67444	4.24189	0.0509501		6.67444	4.24121	0.0580072		6.67444	4.26663	0.0802457		6.67444	4.34275	0.101691
6.68164	4.17711	-0.0198603		6.68164	4.18249	2.98023e-05		6.68164	4.18953	0.0197589		6.68164	4.18488	0.000828504		6.68164	4.20124	0.0117183		6.68164	4.21849	0.0385463		6.68164	4.21002	0.0593305		6.68164	4.24814	0.0571966		6.68164	4.24313	0.0599265		6.68164	4.26308	0.0766993		6.68164	4.33976	0.0987053
6.68884	4.17721	-0.0197649		6.68884	4.18301	0.000548363		6.68884	4.19175	0.0219822		6.68884	4.18164	-0.00241399		6.68884	4.20377	0.0142455		6.68884	4.2176	0.0376582		6.68884	4.20889	0.058198		6.68884	4.25304	0.0621021		6.68884	4.24545	0.0622511		6.68884	4.25997	0.0735879		6.68884	4.33792	0.0968635
6.69604	4.17696	-0.0200152		6.69604	4.18367	0.00120997		6.69604	4.19425	0.0244856		6.69604	4.17871	-0.00533462		6.69604	4.20603	0.0165045		6.69604	4.2163	0.0363588		6.69604	4.20784	0.0571549		6.69604	4.25594	0.0650048		6.69604	4.24798	0.0647783		6.69604	4.25777	0.0713944		6.69604	4.33736	0.0963032
6.70324	4.17613	-0.0208378		6.70324	4.18402	0.00155568		6.70324	4.19655	0.0267804		6.70324	4.17644	-0.00760555		6.70324	4.2077	0.0181794		6.70324	4.21476	0.0348151		6.70324	4.20703	0.0563443		6.70324	4.25639	0.0654519		6.70324	4.2505	0.0672936		6.70324	4.25677	0.0703931		6.70324	4.33806	0.0970006
6.71044	4.17463	-0.0223458		6.71044	4.18367	0.00120997		6.71044	4.19821	0.0284374		6.71044	4.17492	-0.00913143		6.71044	4.20861	0.0190854		6.71044	4.21323	0.0332832		6.71044	4.20657	0.0558794		6.71044	4.25431	0.0633657		6.71044	4.25282	0.0696123		6.71044	4.25705	0.0706732		6.71044	4.3399	0.0988424
6.71764	4.17249	-0.0244856		6.71764	4.18243	-2.98023e-05		6.71764	4.19896	0.0291884		6.71764	4.17412	-0.00993013		6.71764	4.20861	0.0190854		6.71764	4.21193	0.0319898		6.71764	4.20644	0.0557482		6.71764	4.25	0.0590563		6.71764	4.2547	0.0715017		6.71764	4.25849	0.0721097		6.71764	4.34272	0.101668
6.72484	4.16995	-0.0270247		6.72484	4.18032	-0.00214577		6.72484	4.1988	0.0290334		6.72484	4.17402	-0.0100255		6.72484	4.20765	0.0181317		6.72484	4.21103	0.0310898		6.72484	4.20657	0.0558794		6.72484	4.24414	0.0532031		6.72484	4.25593	0.0727296		6.72484	4.2608	0.0744164		6.72484	4.34632	0.105262
6.73204	4.16736	-0.0296116		6.73204	4.1775	-0.00496507		6.73204	4.19791	0.0281394		6.73204	4.17453	-0.00951886		6.73204	4.20581	0.016284		6.73204	4.21058	0.0306368		6.73204	4.20689	0.0562012		6.73204	4.2376	0.0466585		6.73204	4.2564	0.0731945		6.73204	4.26344	0.0770569		6.73204	4.35039	0.109333
6.73924	4.16514	-0.0318348		6.73924	4.17433	-0.00813007		6.73924	4.19649	0.0267267		6.73924	4.17538	-0.00867248		6.73924	4.2033	0.0137806		6.73924	4.21061	0.0306666		6.73924	4.20744	0.0567496		6.73924	4.2312	0.040257		6.73924	4.25621	0.0730038		6.73924	4.2658	0.0794172		6.73924	4.35459	0.113535
6.74644	4.16356	-0.0334144		6.74644	4.17129	-0.0111699		6.74644	4.19479	0.025022		6.74644	4.17615	-0.00789762		6.74644	4.20058	0.0110567		6.74644	4.21116	0.0312209		6.74644	4.2083	0.0576139		6.74644	4.22556	0.0346184		6.74644	4.25567	0.0724673		6.74644	4.26737	0.0809908		6.74644	4.35857	0.117511
6.75364	4.16269	-0.0342846		6.75364	4.1689	-0.0135601		6.75364	4.19302	0.0232518		6.75364	4.17638	-0.00767112		6.75364	4.19807	0.00855327		6.75364	4.21227	0.0323296		6.75364	4.20956	0.0588715		6.75364	4.22103	0.0300884		6.75364	4.25519	0.0719905		6.75364	4.26791	0.0815332		6.75364	4.36198	0.120926
6.76084	4.16244	-0.034529		6.76084	4.16753	-0.014931		6.76084	4.19149	0.0217199		6.76084	4.17578	-0.00826716		6.76084	4.19618	0.00665784		6.76084	4.21391	0.0339687		6.76084	4.21125	0.0605643		6.76084	4.2177	0.0267565		6.76084	4.25509	0.0718832		6.76084	4.26746	0.0810802		6.76084	4.36462	0.12356
6.76804	4.16268	-0.0342965		6.76804	4.16721	-0.0152528		6.76804	4.19044	0.0206709		6.76804	4.17433	-0.00971556		6.76804	4.19515	0.00563264		6.76804	4.21598	0.036037		6.76804	4.21339	0.0626981		6.76804	4.21539	0.0244498		6.76804	4.25556	0.0723541		6.76804	4.26623	0.0798523		6.76804	4.3664	0.125343
6.77524	4.16325	-0.0337243		6.77524	4.16765	-0.0148177		6.77524	4.18995	0.0201821		6.77524	4.17221	-0.0118375		6.77524	4.19508	0.00556111		6.77524	4.21831	0.0383675		6.77524	4.21598	0.0652909		6.77524	4.21375	0.0228107		6.77524	4.25664	0.0734389		6.77524	4.26458	0.0782013		6.77524	4.36732	0.126266
6.78244	4.16403	-0.0329435		6.78244	4.16838	-0.0140846		6.78244	4.18984	0.0200748		6.78244	4.16965	-0.0143945		6.78244	4.19598	0.00646114		6.78244	4.22071	0.0407696		6.78244	4.21904	0.0683546		6.78244	4.21227	0.0213325		6.78244	4.25828	0.0750721		6.78244	4.26292	0.0765383		6.78244	4.36743	0.12638
6.78964	4.1649	-0.0320673		6.78964	4.16899	-0.0134766		6.78964	4.18983	0.020057		6.78964	4.16695	-0.0171006		6.78964	4.1977	0.00817776		6.78964	4.22288	0.0429392		6.78964	4.22248	0.0717938		6.78964	4.21054	0.019598		6.78964	4.26027	0.0770688		6.78964	4.26179	0.0754058		6.78964	4.36678	0.125724
6.79684	4.16582	-0.0311553		6.79684	4.16917	-0.0132918		6.79684	4.18968	0.0199139		6.79684	4.16448	-0.0195682		6.79684	4.19997	0.0104487		6.79684	4.22444	0.0444949		6.79684	4.22608	0.075388		6.79684	4.20834	0.0173986		6.79684	4.26238	0.0791788		6.79684	4.26161	0.075227		6.79684	4.3655	0.124443
6.80404	4.16684	-0.0301301		6.80404	4.16877	-0.0136912		6.80404	4.18929	0.0195265		6.80404	4.16275	-0.0212967		6.80404	4.20245	0.0129282		6.80404	4.22503	0.045085		6.80404	4.22946	0.0787735		6.80404	4.20574	0.0147998		6.80404	4.26425	0.0810504		6.80404	4.26258	0.0762045		6.80404	4.36387	0.122815
6.81124	4.16811	-0.0288606		6.81124	4.1678	-0.0146627		6.81124	4.18861	0.018841		6.81124	4.16221	-0.0218391		6.81124	4.20479	0.0152707		6.81124	4.2244	0.0444531		6.81124	4.23229	0.0816047		6.81124	4.20305	0.0121057		6.81124	4.26554	0.0823379		6.81124	4.26459	0.0782073		6.81124	4.36223	0.12117
6.81844	4.16973	-0.0272453		6.81844	4.16651	-0.0159562		6.81844	4.18756	0.017792		6.81844	4.16309	-0.020957		6.81844	4.20677	0.0172496		6.81844	4.22249	0.0425518		6.81844	4.2343	0.0836134		6.81844	4.20063	0.00968575		6.81844	4.26602	0.0828207		6.81844	4.26723	0.0808537		6.81844	4.3608	0.119746
6.82564	4.17161	-0.0253618		6.82564	4.16541	-0.0170588		6.82564	4.18615	0.0163853		6.82564	4.16529	-0.0187576		6.82564	4.20833	0.0188112		6.82564	4.21944	0.039494		6.82564	4.23532	0.0846326		6.82564	4.19883	0.00789165		6.82564	4.26568	0.0824749		6.82564	4.27009	0.0837088		6.82564	4.35967	0.118613
6.83284	4.17358	-0.0233948		6.83284	4.16505	-0.0174105		6.83284	4.18451	0.0147462		6.83284	4.16843	-0.0156224		6.83284	4.20954	0.0200152		6.83284	4.21543	0.0354886		6.83284	4.23527	0.084585		6.83284	4.19791	0.00697374		6.83284	4.26467	0.0814676		6.83284	4.27274	0.0863612		6.83284	4.35871	0.11766
6.84004	4.17542	-0.021553		6.84004	4.16586	-0.0165999		6.84004	4.18289	0.013119		6.84004	4.17206	-0.0119925		6.84004	4.21047	0.020951		6.84004	4.21076	0.0308216		6.84004	4.23412	0.0834346		6.84004	4.19801	0.00706911		6.84004	4.26327	0.0800669		6.84004	4.2749	0.0885248		6.84004	4.35777	0.116712
6.84724	4.17703	-0.0199437		6.84724	4.16794	-0.0145197		6.84724	4.18147	0.0117004		6.84724	4.17572	-0.00832677		6.84724	4.21119	0.0216722		6.84724	4.20585	0.0259101		6.84724	4.23196	0.0812709		6.84724	4.19908	0.00813603		6.84724	4.26174	0.078541		6.84724	4.27636	0.0899792		6.84724	4.35668	0.115627
6.85444	4.17836	-0.0186145		6.85444	4.17116	-0.011307		6.85444	4.18034	0.0105679		6.85444	4.17896	-0.00509024		6.85444	4.21164	0.0221193		6.85444	4.20112	0.0211775		6.85444	4.229	0.0783086		6.85444	4.20092	0.00998378		6.85444	4.2603	0.0770926		6.85444	4.27709	0.0907063		6.85444	4.35535	0.114292
6.86164	4.1794	-0.0175714		6.86164	4.17514	-0.00732541		6.86164	4.17948	0.0097096		6.86164	4.18131	-0.00274181		6.86164	4.21174	0.0222206		6.86164	4.19695	0.0170112		6.86164	4.22553	0.0748396		6.86164	4.20327	0.0123262		6.86164	4.25915	0.0759482		6.86164	4.27724	0.0908554		6.86164	4.35362	0.112569
6.86884	4.1801	-0.0168741		6.86884	4.17941	-0.00305176		6.86884	4.17885	0.00907779		6.86884	4.18245	-0.00160337		6.86884	4.21146	0.0219345		6.86884	4.19359	0.0136435		6.86884	4.22189	0.0712037		6.86884	4.20579	0.0148535		6.86884	4.2585	0.0752926		6.86884	4.27712	0.0907421		6.86884	4.3514	0.11034
6.87604	4.18043	-0.0165462		6.87604	4.18336	0.00090003		6.87604	4.17838	0.00860691		6.87604	4.18231	-0.0017345		6.87604	4.21083	0.0213087		6.87604	4.19109	0.011152		6.87604	4.2184	0.0677109		6.87604	4.20827	0.0173271		6.87604	4.25844	0.0752389		6.87604	4.27709	0.0907063		6.87604	4.34859	0.107533
6.88324	4.18042	-0.0165522		6.88324	4.18644	0.00397563		6.88324	4.17796	0.00819564		6.88324	4.18113	-0.00291467		6.88324	4.20997	0.0204504		6.88324	4.18953	0.00958443		6.88324	4.21533	0.0646412		6.88324	4.21056	0.0196218		6.88324	4.25897	0.0757635		6.88324	4.27732	0.0909448		6.88324	4.34527	0.104213
6.89044	4.18022	-0.0167549		6.89044	4.18829	0.00582933		6.89044	4.17753	0.00776053		6.89044	4.17932	-0.00472665		6.89044	4.20902	0.0195026		6.89044	4.18899	0.00904799		6.89044	4.21293	0.0622451		6.89044	4.21266	0.0217199		6.89044	4.25991	0.0767052		6.89044	4.27787	0.0914931		6.89044	4.34164	0.100589
6.89764	4.17996	-0.0170112		6.89764	4.18895	0.00648499		6.89764	4.17706	0.00729561		6.89764	4.17728	-0.00677109		6.89764	4.20815	0.0186324		6.89764	4.18954	0.00960231		6.89764	4.21136	0.0606716		6.89764	4.21461	0.023669		6.89764	4.26101	0.0778079		6.89764	4.2786	0.0922203		6.89764	4.33803	0.0969708
6.90484	4.17972	-0.0172555		6.90484	4.18868	0.00621676		6.90484	4.1767	0.00693202		6.90484	4.17535	-0.00870228		6.90484	4.20759	0.0180721		6.90484	4.19123	0.0112891		6.90484	4.21062	0.0599325		6.90484	4.21644	0.0255048		6.90484	4.26195	0.0787437		6.90484	4.2793	0.0929177		6.90484	4.33469	0.0936389
6.91204	4.1795	-0.0174761		6.91204	4.18783	0.00536442		6.91204	4.17659	0.00682473		6.91204	4.17381	-0.0102401		6.91204	4.20763	0.0181079		6.91204	4.19396	0.0140131		6.91204	4.21062	0.0599325		6.91204	4.2181	0.0271618		6.91204	4.26235	0.079143		6.91204	4.27973	0.0933528		6.91204	4.33191	0.0908554
6.91924	4.17929	-0.0176847		6.91924	4.1867	0.00423193		6.91924	4.1768	0.00703335		6.91924	4.1729	-0.0111461		6.91924	4.20845	0.0189304		6.91924	4.19751	0.0175655		6.91924	4.21118	0.0604868		6.91924	4.21942	0.0284791		6.91924	4.2619	0.078702		6.91924	4.27971	0.093329		6.91924	4.32985	0.088799
6.92644	4.17911	-0.0178576		6.92644	4.18552	0.00305772		6.92644	4.17731	0.00753999		6.92644	4.17278	-0.0112653		6.92644	4.21005	0.0205338		6.92644	4.20155	0.0216067		6.92644	4.21201	0.0613213		6.92644	4.22016	0.0292242		6.92644	4.26045	0.0772476		6.92644	4.27921	0.0928342		6.92644	4.32861	0.0875592
6.93364	4.17907	-0.0178993		6.93364	4.18456	0.00209808		6.93364	4.1781	0.00833273		6.93364	4.17347	-0.0105798		6.93364	4.21216	0.0226438		6.93364	4.20564	0.0257015		6.93364	4.21282	0.0621319		6.93364	4.22013	0.0291944		6.93364	4.25802	0.0748158		6.93364	4.27845	0.0920713		6.93364	4.32827	0.0872135
6.94084	4.17919	-0.0177801		6.94084	4.184	0.00153184		6.94084	4.17917	0.00939965		6.94084	4.17485	-0.00920296		6.94084	4.21436	0.0248432		6.94084	4.20932	0.0293732		6.94084	4.21327	0.0625789		6.94084	4.21924	0.0283003		6.94084	4.25483	0.0716269		6.94084	4.27774	0.091356		6.94084	4.32884	0.0877857
6.94804	4.17942	-0.0175476		6.94804	4.18382	0.00135899		6.94804	4.18044	0.0106752		6.94804	4.17675	-0.00730157		6.94804	4.21618	0.0266612		6.94804	4.21211	0.0321686		6.94804	4.21308	0.0623941		6.94804	4.21751	0.0265658		6.94804	4.25126	0.0680566		6.94804	4.27734	0.0909626		6.94804	4.33027	0.0892162
6.95524	4.17958	-0.0173867		6.95524	4.18385	0.00138283		6.95524	4.18171	0.0119448		6.95524	4.17897	-0.00507832		6.95524	4.21723	0.0277042		6.95524	4.21368	0.0337422		6.95524	4.21215	0.0614583		6.95524	4.21513	0.0241935		6.95524	4.24778	0.0645816		6.95524	4.27739	0.0910103		6.95524	4.33246	0.0914097
6.96244	4.17945	-0.0175178		6.96244	4.18382	0.00135899		6.96244	4.18273	0.012958		6.96244	4.18131	-0.00274181		6.96244	4.21723	0.0277102		6.96244	4.21383	0.0338852		6.96244	4.21044	0.0597477		6.96244	4.21245	0.0215113		6.96244	4.24497	0.0617683		6.96244	4.27784	0.0914633		6.96244	4.33524	0.0941813
6.96964	4.1789	-0.0180721		6.96964	4.18366	0.00119209		6.96964	4.18329	0.0135243		6.96964	4.18359	-0.000458956		6.96964	4.2161	0.0265777		6.96964	4.21247	0.0325322		6.96964	4.20804	0.0573516		6.96964	4.20986	0.0189245		6.96964	4.24334	0.0601351		6.96964	4.27855	0.0921667		6.96964	4.33841	0.0973523
6.97684	4.17789	-0.0190854		6.97684	4.18348	0.00101328		6.97684	4.1833	0.0135362		6.97684	4.18568	0.00163317		6.97684	4.21391	0.0243843		6.97684	4.20976	0.0298142		6.97684	4.20516	0.0544667		6.97684	4.2078	0.0168562		6.97684	4.2432	0.0599921		6.97684	4.27933	0.0929475		6.97684	4.34187	0.100815
6.98404	4.17654	-0.0204325		6.98404	4.18354	0.00107884		6.98404	4.18268	0.0129104		6.98404	4.18751	0.00346303		6.98404	4.21088	0.0213623		6.98404	4.20603	0.026089		6.98404	4.20215	0.0514567		6.98404	4.20659	0.0156462		6.98404	4.24448	0.0612795		6.98404	4.2799	0.0935197		6.98404	4.34562	0.104564
6.99124	4.17504	-0.0219345		6.99124	4.184	0.00153184		6.99124	4.18138	0.011611		6.99124	4.18898	0.0049293		6.99124	4.20737	0.0178456		6.99124	4.20181	0.021863		6.99124	4.19948	0.0487924		6.99124	4.20642	0.0154793		6.99124	4.24682	0.063616		6.99124	4.27992	0.0935376		6.99124	4.34973	0.108671
6.99844	4.17356	-0.0234067		6.99844	4.18484	0.00237823		6.99844	4.17948	0.0097096		6.99844	4.19001	0.00596046		6.99844	4.20374	0.0142217		6.99844	4.19761	0.0176668		6.99844	4.19757	0.0468791		6.99844	4.20733	0.0163913		6.99844	4.24967	0.0664651		6.99844	4.27908	0.0926971		6.99844	4.35424	0.113183
7.00564	4.17234	-0.0246346		7.00564	4.18591	0.00345111		7.00564	4.17719	0.00742674		7.00564	4.19052	0.00647306		7.00564	4.20041	0.0108898		7.00564	4.19382	0.013876		7.00564	4.19661	0.0459254		7.00564	4.20921	0.0182688		7.00564	4.25247	0.0692666		7.00564	4.2773	0.0909209		7.00564	4.3591	0.118047
7.01284	4.17157	-0.0253975		7.01284	4.18707	0.00460744		7.01284	4.17484	0.00507235		7.01284	4.19056	0.00651479		7.01284	4.19771	0.00818968		7.01284	4.19067	0.0107288		7.01284	4.19667	0.045979		7.01284	4.21186	0.0209212		7.01284	4.25477	0.0715673		7.01284	4.27473	0.088352		7.01284	4.36413	0.123072
7.02004	4.17148	-0.0254869		7.02004	4.18821	0.00574589		7.02004	4.17268	0.00291467		7.02004	4.19025	0.00620484		7.02004	4.1958	0.00628233		7.02004	4.1883	0.00835657		7.02004	4.19763	0.0469387		7.02004	4.21507	0.024128		7.02004	4.25622	0.0730217		7.02004	4.27164	0.0852585		7.02004	4.36904	0.127983
7.02724	4.17215	-0.0248194		7.02724	4.18922	0.00675917		7.02724	4.17095	0.00118613		7.02724	4.18977	0.00571608		7.02724	4.19471	0.0051856		7.02724	4.18681	0.00686646		7.02724	4.19931	0.0486255		7.02724	4.21864	0.0276983		7.02724	4.25663	0.073427		7.02724	4.26831	0.0819266		7.02724	4.37356	0.132501
7.03445	4.17337	-0.0235975		7.03445	4.18999	0.00752807		7.03445	4.1699	0.00013113		7.03445	4.18924	0.00519156		7.03445	4.19441	0.00489354		7.03445	4.18623	0.00628829		7.03445	4.20148	0.0507951		7.03445	4.22239	0.0314474		7.03445	4.25602	0.072813		7.03445	4.26493	0.078553		7.03445	4.37739	0.13634
7.04165	4.17477	-0.0221968		7.04165	4.19038	0.0079155		7.04165	4.16971	-5.3644e-05		7.04165	4.18878	0.00472665		7.04165	4.19492	0.00540018		7.04165	4.18643	0.00648499		7.04165	4.20384	0.0531495		7.04165	4.22609	0.0351548		7.04165	4.25472	0.0715137		7.04165	4.26173	0.0753462		7.04165	4.3803	0.139242
7.04885	4.17596	-0.0210106		7.04885	4.19033	0.00786185		7.04885	4.17044	0.000667572		7.04885	4.18847	0.00442266		7.04885	4.19623	0.00671148		7.04885	4.18715	0.0072062		7.04885	4.20613	0.0554442		7.04885	4.22958	0.0386357		7.04885	4.25323	0.0700235		7.04885	4.2589	0.072521		7.04885	4.38202	0.140965
7.05605	4.17668	-0.0202954		7.05605	4.18999	0.00752807		7.05605	4.17178	0.00201464		7.05605	4.18841	0.0043571		7.05605	4.19824	0.00872016		7.05605	4.18808	0.00814199		7.05605	4.20828	0.05759		7.05605	4.23263	0.0416934		7.05605	4.25202	0.0688136		7.05605	4.25676	0.0703812		7.05605	4.38242	0.141364
7.06325	4.17686	-0.0201106		7.06325	4.18971	0.00724196		7.06325	4.17324	0.00347495		7.06325	4.18856	0.00450611		7.06325	4.20074	0.0112236		7.06325	4.18901	0.00906587		7.06325	4.21038	0.0596881		7.06325	4.23519	0.0442505		7.06325	4.2514	0.0681937		7.06325	4.2556	0.0692189		7.06325	4.38154	0.140482
7.07045	4.17657	-0.0204027		7.07045	4.18977	0.00730753		7.07045	4.17435	0.00457764		7.07045	4.18872	0.00466704		7.07045	4.20346	0.0139415		7.07045	4.18986	0.00991821		7.07045	4.21256	0.0618756		7.07045	4.2372	0.0462651		7.07045	4.25145	0.0682473		7.07045	4.2557	0.0693202		7.07045	4.3796	0.138545
7.07765	4.17587	-0.0211		7.07765	4.19034	0.00787973		7.07765	4.17488	0.00510812		7.07765	4.18858	0.00452995		7.07765	4.20616	0.0166357		7.07765	4.19064	0.010699		7.07765	4.21497	0.0642836		7.07765	4.23871	0.0477672		7.07765	4.25213	0.0689268		7.07765	4.25721	0.0708282		7.07765	4.37702	0.135964
7.08485	4.175	-0.0219703		7.08485	4.19134	0.00888109		7.08485	4.17483	0.00506043		7.08485	4.18785	0.00379682		7.08485	4.20861	0.0190914		7.08485	4.19132	0.0113785		7.08485	4.21764	0.0669539		7.08485	4.23974	0.0488043		7.08485	4.25332	0.0701189		7.08485	4.26016	0.0737846		7.08485	4.37422	0.133169
7.09205	4.17434	-0.0226319		7.09205	4.1926	0.0101328		7.09205	4.17434	0.00457168		7.09205	4.18631	0.00225902		7.09205	4.21064	0.0211239		7.09205	4.19181	0.0118673		7.09205	4.22046	0.0697732		7.09205	4.24045	0.0495076		7.09205	4.25479	0.0715911		7.09205	4.26447	0.078094		7.09205	4.37158	0.130528
7.09925	4.17432	-0.0226498		7.09925	4.19397	0.0115097		7.09925	4.17357	0.00380278		7.09925	4.18384	-0.000208616		7.09925	4.21205	0.0225306		7.09925	4.19205	0.0121117		7.09925	4.22317	0.0724792		7.09925	4.24097	0.0500262		7.09925	4.25625	0.0730455		7.09925	4.26992	0.0835419		7.09925	4.36937	0.128311
7.10645	4.17523	-0.0217378		7.10645	4.19536	0.0128925		7.10645	4.17278	0.00301003		7.10645	4.18041	-0.00364184		7.10645	4.21274	0.023222		7.10645	4.1921	0.0121593		7.10645	4.22535	0.0746608		7.10645	4.24147	0.0505269		7.10645	4.25746	0.0742614		7.10645	4.27617	0.0897944		7.10645	4.3678	0.126749
7.11365	4.17708	-0.019896		7.11365	4.19656	0.0140965		7.11365	4.17227	0.00250339		7.11365	4.17611	-0.00793934		7.11365	4.21271	0.0231922		7.11365	4.19217	0.0122249		7.11365	4.22661	0.0759244		7.11365	4.24195	0.0510097		7.11365	4.25843	0.075227		7.11365	4.28277	0.0963867		7.11365	4.36709	0.126034
7.12085	4.17953	-0.0174403		7.12085	4.1973	0.0148356		7.12085	4.17236	0.0025928		7.12085	4.17122	-0.0128329		7.12085	4.21208	0.0225604		7.12085	4.19248	0.0125408		7.12085	4.22672	0.0760317		7.12085	4.24226	0.0513196		7.12085	4.25929	0.0760853		7.12085	4.28913	0.102752		7.12085	4.36729	0.126231
7.12805	4.18221	-0.0147641		7.12805	4.19729	0.0148237		7.12805	4.17312	0.00334978		7.12805	4.1661	-0.0179529		7.12805	4.21109	0.021565		7.12805	4.19325	0.0133097		7.12805	4.22565	0.0749648		7.12805	4.24221	0.051266		7.12805	4.26024	0.077039		7.12805	4.29474	0.108361		7.12805	4.36828	0.12722
7.13525	4.18465	-0.0123262		7.13525	4.19638	0.0139117		7.13525	4.17432	0.00454783		7.13525	4.16117	-0.0228822		7.13525	4.21	0.0204742		7.13525	4.19461	0.0146627		7.13525	4.2236	0.0729084		7.13525	4.24167	0.0507295		7.13525	4.26139	0.0781834		7.13525	4.29928	0.112903		7.13525	4.36983	0.12877
7.14245	4.1864	-0.0105739		7.14245	4.19458	0.0121117		7.14245	4.17554	0.00577569		7.14245	4.15682	-0.0272274		7.14245	4.20908	0.0195563		7.14245	4.19671	0.0167668		7.14245	4.22085	0.0701606		7.14245	4.24066	0.0497222		7.14245	4.26274	0.0795364		7.14245	4.30264	0.116265		7.14245	4.37168	0.130624
7.14965	4.18702	-0.00995398		7.14965	4.19199	0.00953078		7.14965	4.17642	0.00665188		7.14965	4.15348	-0.0305653		7.14965	4.20855	0.0190258		7.14965	4.19975	0.0198066		7.14965	4.21777	0.067085		7.14965	4.23926	0.0483155		7.14965	4.26431	0.081104		7.14965	4.30494	0.11856		7.14965	4.37367	0.132614
7.15685	4.1862	-0.0107706		7.15685	4.18872	0.00625849		7.15685	4.17675	0.00698566		7.15685	4.15158	-0.0324666		7.15685	4.20848	0.0189602		7.15685	4.20381	0.0238717		7.15685	4.21479	0.0641048		7.15685	4.23747	0.0465333		7.15685	4.26609	0.0828862		7.15685	4.30638	0.119996		7.15685	4.37574	0.134683
7.16405	4.18392	-0.0130534		7.16405	4.18487	0.00240803		7.16405	4.17657	0.00680685		7.16405	4.15142	-0.0326335		7.16405	4.20889	0.0193715		7.16405	4.20876	0.0288188		7.16405	4.21227	0.0615835		7.16405	4.23543	0.0444889		7.16405	4.26794	0.0847399		7.16405	4.30719	0.120813		7.16405	4.37782	0.136763
7.17125	4.18053	-0.0164449		7.17125	4.1806	-0.00186563		7.17125	4.17603	0.00625849		7.17125	4.15304	-0.0310123		7.17125	4.2098	0.0202775		7.17125	4.21413	0.0341833		7.17125	4.21038	0.0596941		7.17125	4.23335	0.0424087		7.17125	4.26962	0.0864148		7.17125	4.30762	0.121236		7.17125	4.37982	0.138766
7.17845	4.17665	-0.0203252		7.17845	4.17617	-0.00629425		7.17845	4.17534	0.00556707		7.17845	4.15624	-0.0278056		7.17845	4.21116	0.0216365		7.17845	4.21932	0.0393808		7.17845	4.20903	0.058341		7.17845	4.2316	0.0406563		7.17845	4.27083	0.0876248		7.17845	4.30788	0.121504		7.17845	4.38175	0.140691
7.18565	4.17293	-0.0240445		7.18565	4.17185	-0.0106096		7.18565	4.17476	0.00498891		7.18565	4.1607	-0.0233471		7.18565	4.21287	0.0233531		7.18565	4.22378	0.0438333		7.18565	4.20794	0.0572503		7.18565	4.23046	0.0395238		7.18565	4.27143	0.0882268		7.18565	4.30824	0.121856		7.18565	4.38365	0.142598
7.19285	4.16989	-0.0270844		7.19285	4.16787	-0.0145972		7.19285	4.1746	0.00482798		7.19285	4.16602	-0.0180244		7.19285	4.21473	0.0252128		7.19285	4.22705	0.0471115		7.19285	4.20684	0.0561535		7.19285	4.23009	0.0391483		7.19285	4.27148	0.0882804		7.19285	4.30887	0.122488		7.19285	4.38565	0.144595
7.20005	4.16788	-0.029093		7.20005	4.16439	-0.0180721		7.20005	4.17503	0.00526309		7.20005	4.17175	-0.0123024		7.20005	4.21647	0.0269532		7.20005	4.22887	0.0489295		7.20005	4.2056	0.0549078		7.20005	4.23043	0.0394881		7.20005	4.27117	0.0879705		7.20005	4.30989	0.123513		7.20005	4.38775	0.146699
7.20725	4.16718	-0.0297904		7.20725	4.16157	-0.0208974		7.20725	4.17612	0.00635385		7.20725	4.17726	-0.00678897		7.20725	4.21799	0.0284672		7.20725	4.22907	0.0491321		7.20725	4.2042	0.0535131		7.20725	4.23136	0.0404239		7.20725	4.27063	0.0874281		7.20725	4.31125	0.124866		7.20725	4.38986	0.148803
7.21445	4.16791	-0.0290632		7.21445	4.15951	-0.0229537		7.21445	4.17768	0.0079155		7.21445	4.18188	-0.00216961		7.21445	4.21932	0.0297964		7.21445	4.22772	0.0477731		7.21445	4.20273	0.0520408		7.21445	4.23275	0.0418127		7.21445	4.26992	0.0867188		7.21445	4.31269	0.126314		7.21445	4.39187	0.150818
7.22165	4.17005	-0.0269234		7.22165	4.15829	-0.0241697		7.22165	4.17942	0.00964999		7.22165	4.18505	0.00100136		7.22165	4.22052	0.0309944		7.22165	4.22514	0.0451982		7.22165	4.20133	0.0506401		7.22165	4.23441	0.0434697		7.22165	4.26908	0.0858724		7.22165	4.31394	0.12756		7.22165	4.39379	0.152737
7.22885	4.17331	-0.023663		7.22885	4.15794	-0.0245214		7.22885	4.18099	0.0112236		7.22885	4.18653	0.00247955		7.22885	4.22161	0.0320911		7.22885	4.22198	0.0420332		7.22885	4.20022	0.0495315		7.22885	4.23604	0.0451028		7.22885	4.26811	0.0849068		7.22885	4.31471	0.128329		7.22885	4.39568	0.154626
7.23605	4.17722	-0.019753		7.23605	4.15842	-0.0240445		7.23605	4.18217	0.0124037		7.23605	4.18639	0.00234246		7.23605	4.22258	0.0330567		7.23605	4.21896	0.0390172		7.23605	4.19964	0.0489533		7.23605	4.23729	0.0463486		7.23605	4.26705	0.0838518		7.23605	4.3148	0.128424		7.23605	4.39758	0.156528
7.24325	4.18127	-0.0156999		7.24325	4.15961	-0.0228584		7.24325	4.18289	0.0131249		7.24325	4.18493	0.000882149		7.24325	4.22344	0.033915		7.24325	4.21669	0.0367463		7.24325	4.19977	0.0490844		7.24325	4.23789	0.0469506		7.24325	4.2659	0.0826955		7.24325	4.314	0.12762		7.24325	4.39956	0.158507
7.25045	4.18507	-0.011903		7.25045	4.16133	-0.0211358		7.25045	4.18323	0.0134647		7.25045	4.18252	-0.00153184		7.25045	4.22432	0.0348032		7.25045	4.21548	0.0355363		7.25045	4.2007	0.0500083		7.25045	4.23772	0.0467837		7.25045	4.26461	0.081408		7.25045	4.3121	0.125718		7.25045	4.40171	0.160652
7.25765	4.18835	-0.00862479		7.25765	4.16336	-0.0191033		7.25765	4.18336	0.0135958		7.25765	4.17964	-0.00440478		7.25765	4.22539	0.0358641		7.25765	4.21541	0.0354707		7.25765	4.2024	0.051707		7.25765	4.23689	0.0459552		7.25765	4.26316	0.0799596		7.25765	4.30894	0.122565		7.25765	4.40411	0.163054
7.26485	4.19096	-0.00601411		7.26485	4.16548	-0.0169814		7.26485	4.18351	0.0137448		7.26485	4.17686	-0.00718832		7.26485	4.22664	0.0371218		7.26485	4.21634	0.0363946		7.26485	4.20482	0.054127		7.26485	4.23567	0.0447273		7.26485	4.26163	0.0784278		7.26485	4.3046	0.11822		7.26485	4.40681	0.165755
7.27205	4.19279	-0.00417829		7.27205	4.1675	-0.0149667		7.27205	4.18383	0.0140667		7.27205	4.1747	-0.00935197		7.27205	4.22797	0.038445		7.27205	4.21799	0.0380456		7.27205	4.20788	0.0571907		7.27205	4.23443	0.0434935		7.27205	4.26017	0.0769675		7.27205	4.29941	0.113028		7.27205	4.40969	0.168639
7.27925	4.19383	-0.00314116		7.27925	4.1693	-0.0131607		7.27925	4.18442	0.0146568		7.27925	4.17348	-0.0105739		7.27925	4.22914	0.0396192		7.27925	4.21991	0.0399709		7.27925	4.21149	0.0607967		7.27925	4.23361	0.042671		7.27925	4.25898	0.0757754		7.27925	4.29388	0.107503		7.27925	4.4125	0.171441
7.28645	4.19415	-0.00282526		7.28645	4.17088	-0.0115812		7.28645	4.1853	0.015533		7.28645	4.17321	-0.0108421		7.28645	4.22996	0.0404358		7.28645	4.2216	0.0416577		7.28645	4.21548	0.0647902		7.28645	4.23356	0.0426233		7.28645	4.25825	0.0750482		7.28645	4.28858	0.102198		7.28645	4.41495	0.173897
7.29365	4.19398	-0.00299215		7.29365	4.17238	-0.0100791		7.29365	4.18639	0.0166178		7.29365	4.17367	-0.0103772		7.29365	4.23028	0.0407636		7.29365	4.22259	0.0426471		7.29365	4.21972	0.0690281		7.29365	4.23446	0.0435233		7.29365	4.25811	0.0749052		7.29365	4.28392	0.097537		7.29365	4.41686	0.175804
7.30085	4.1936	-0.00337362		7.30085	4.17405	-0.00841618		7.30085	4.18756	0.017792		7.30085	4.17455	-0.00950098		7.30085	4.23002	0.0404954		7.30085	4.22264	0.0426948		7.30085	4.22401	0.0733197		7.30085	4.23625	0.0453115		7.30085	4.25855	0.0753462		7.30085	4.28027	0.0938892		7.30085	4.41815	0.177091
7.30805	4.19322	-0.00375509		7.30805	4.17613	-0.00633597		7.30805	4.18873	0.0189662		7.30805	4.1756	-0.00845194		7.30805	4.22906	0.0395358		7.30805	4.22172	0.0417769		7.30805	4.22814	0.0774562		7.30805	4.23863	0.0476897		7.30805	4.25953	0.0763297		7.30805	4.27797	0.0915945		7.30805	4.41883	0.177771
7.31525	4.19291	-0.00405908		7.31525	4.17871	-0.00374913		7.31525	4.18983	0.020057		7.31525	4.17666	-0.00739098		7.31525	4.22736	0.037843		7.31525	4.22003	0.0400841		7.31525	4.23186	0.0811756		7.31525	4.24117	0.0502288		7.31525	4.26096	0.0777543		7.31525	4.27728	0.090903		7.31525	4.41896	0.177908
7.32245	4.19264	-0.00433326		7.32245	4.18175	-0.000715256		7.32245	4.19083	0.0210583		7.32245	4.17764	-0.0064075		7.32245	4.22503	0.0355065		7.32245	4.21789	0.0379443		7.32245	4.2349	0.0842094		7.32245	4.2434	0.052458		7.32245	4.26266	0.079459		7.32245	4.27834	0.091958		7.32245	4.4187	0.177646
7.32965	4.19225	-0.00472069		7.32965	4.18498	0.00251532		7.32965	4.19174	0.0219762		7.32965	4.17854	-0.00550747		7.32965	4.22229	0.0327706		7.32965	4.21567	0.035727		7.32965	4.237	0.0863135		7.32965	4.24495	0.0540137		7.32965	4.26451	0.0813067		7.32965	4.28103	0.0946522		7.32965	4.41821	0.177151
7.33685	4.19157	-0.00540018		7.33685	4.18807	0.0056088		7.33685	4.19262	0.0228524		7.33685	4.17939	-0.00466108		7.33685	4.21951	0.0299931		7.33685	4.21377	0.0338316		7.33685	4.23809	0.0874043		7.33685	4.24565	0.0547111		7.33685	4.26636	0.0831604		7.33685	4.28511	0.0987291		7.33685	4.41756	0.176507
7.34405	4.1904	-0.00656843		7.34405	4.19064	0.0081718		7.34405	4.19343	0.023663		7.34405	4.18035	-0.00370145		7.34405	4.21708	0.0275612		7.34405	4.21246	0.0325203		7.34405	4.23827	0.0875771		7.34405	4.24551	0.0545681		7.34405	4.26807	0.0848711		7.34405	4.29024	0.103861		7.34405	4.41681	0.175756
7.35125	4.18857	-0.00840425		7.35125	4.19227	0.00980496		7.35125	4.19413	0.0243604		7.35125	4.18163	-0.00241995		7.35125	4.21532	0.0257969		7.35125	4.21181	0.0318646		7.35125	4.23773	0.0870407		7.35125	4.24472	0.0537813		7.35125	4.26952	0.0863135		7.35125	4.29607	0.10969		7.35125	4.41587	0.174814
7.35845	4.18599	-0.0109792		7.35845	4.19266	0.0101924		7.35845	4.19465	0.024879		7.35845	4.18338	-0.000673533		7.35845	4.21441	0.0248909		7.35845	4.21168	0.0317395		7.35845	4.23678	0.0860929		7.35845	4.24359	0.0526488		7.35845	4.27047	0.0872672		7.35845	4.30219	0.115806		7.35845	4.41461	0.173557
7.36565	4.18274	-0.0142336		7.36565	4.19176	0.00929236		7.36565	4.19489	0.0251174		7.36565	4.18561	0.00155568		7.36565	4.21447	0.0249505		7.36565	4.21193	0.0319839		7.36565	4.23571	0.0850201		7.36565	4.2425	0.051558		7.36565	4.27083	0.0876248		7.36565	4.30816	0.121778		7.36565	4.41292	0.171864
7.37285	4.17898	-0.0179946		7.37285	4.18983	0.00736713		7.37285	4.19478	0.0250101		7.37285	4.18817	0.00411868		7.37285	4.2155	0.0259817		7.37285	4.21241	0.0324667		7.37285	4.2348	0.0841141		7.37285	4.24175	0.050813		7.37285	4.2706	0.0873923		7.37285	4.31358	0.127202		7.37285	4.41074	0.169683
7.38005	4.17495	-0.022018		7.38005	4.18731	0.00484586		7.38005	4.19429	0.0245214		7.38005	4.1909	0.00685453		7.38005	4.21744	0.0279188		7.38005	4.21303	0.0330865		7.38005	4.23433	0.0836432		7.38005	4.24158	0.0506401		7.38005	4.26998	0.0867784		7.38005	4.31818	0.131804		7.38005	4.40821	0.167155
7.38725	4.17098	-0.0259936		7.38725	4.18464	0.00217557		7.38725	4.19343	0.0236571		7.38725	4.19367	0.00962019		7.38725	4.22012	0.030601		7.38725	4.21373	0.0337839		7.38725	4.23445	0.0837624		7.38725	4.242	0.0510573		7.38725	4.26929	0.086087		7.38725	4.32188	0.135499		7.38725	4.40571	0.164658
7.39445	4.16738	-0.0295877		7.39445	4.18212	-0.000345707		7.39445	4.19232	0.0225484		7.39445	4.19638	0.0123262		7.39445	4.22329	0.033766		7.39445	4.21446	0.034517		7.39445	4.23514	0.0844479		7.39445	4.2429	0.0519574		7.39445	4.26887	0.0856638		7.39445	4.32473	0.138348		7.39445	4.40378	0.162721
7.40165	4.16455	-0.032419		7.40165	4.17994	-0.00252724		7.40165	4.19117	0.021404		7.40165	4.19888	0.0148356		7.40165	4.22661	0.037086		7.40165	4.21525	0.0353038		7.40165	4.23617	0.085485		7.40165	4.24414	0.0532031		7.40165	4.26899	0.085783		7.40165	4.32681	0.140435		7.40165	4.40292	0.161868
7.40885	4.1628	-0.0341713		7.40885	4.1782	-0.00426173		7.40885	4.19019	0.0204265		7.40885	4.20094	0.016892		7.40885	4.22974	0.0402212		7.40885	4.21616	0.0362158		7.40885	4.23726	0.0865698		7.40885	4.24569	0.0547469		7.40885	4.26994	0.0867367		7.40885	4.3283	0.141919		7.40885	4.40359	0.162536
7.41605	4.1623	-0.034672		7.41605	4.1769	-0.00556111		7.41605	4.18952	0.019747		7.41605	4.20223	0.0181794		7.41605	4.23244	0.0429213		7.41605	4.21728	0.0373363		7.41605	4.23811	0.0874221		7.41605	4.2475	0.0565588		7.41605	4.27192	0.0887156		7.41605	4.32935	0.142968		7.41605	4.40611	0.165057
7.42325	4.16301	-0.0339568		7.42325	4.17576	-0.00669956		7.42325	4.18918	0.0194132		7.42325	4.20245	0.0184		7.42325	4.23445	0.044924		7.42325	4.21856	0.0386178		7.42325	4.23856	0.0878751		7.42325	4.24958	0.058639		7.42325	4.27493	0.0917315		7.42325	4.33016	0.143784		7.42325	4.41061	0.169551
7.43045	4.16473	-0.0322461		7.43045	4.17439	-0.00807643		7.43045	4.18916	0.0193894		7.43045	4.20144	0.0173867		7.43045	4.23554	0.0460148		7.43045	4.21979	0.0398457		7.43045	4.23847	0.0877798		7.43045	4.25186	0.0609219		7.43045	4.27868	0.0954747		7.43045	4.3308	0.144422		7.43045	4.4169	0.175846
7.43765	4.16712	-0.02985		7.43765	4.1724	-0.0100672		7.43765	4.18942	0.0196517		7.43765	4.19914	0.0150919		7.43765	4.23554	0.0460207		7.43765	4.22062	0.0406802		7.43765	4.2377	0.0870109		7.43765	4.25426	0.063324		7.43765	4.28262	0.0994205		7.43765	4.33111	0.144732		7.43765	4.42439	0.183338
7.44485	4.16979	-0.0271857		7.44485	4.16966	-0.0128031		7.44485	4.18988	0.0201166		7.44485	4.19565	0.011605		7.44485	4.23436	0.0448406		7.44485	4.22077	0.0408232		7.44485	4.23618	0.0854909		7.44485	4.25668	0.0657439		7.44485	4.28612	0.102919		7.44485	4.33077	0.144386		7.44485	4.43212	0.191063
7.45205	4.17222	-0.0247538		7.45205	4.1664	-0.0160635		7.45205	4.19044	0.0206709		7.45205	4.19118	0.00712871		7.45205	4.23209	0.0425696		7.45205	4.22007	0.0401318		7.45205	4.23397	0.0832796		7.45205	4.25899	0.0680506		7.45205	4.28861	0.105405		7.45205	4.32951	0.143129		7.45205	4.43901	0.197953
7.45925	4.17389	-0.0230849		7.45925	4.16296	-0.0195086		7.45925	4.19094	0.0211716		7.45925	4.18615	0.00209808		7.45925	4.22897	0.0394523		7.45925	4.21865	0.0387073		7.45925	4.23121	0.0805259		7.45925	4.26101	0.0700712		7.45925	4.28975	0.106543		7.45925	4.32733	0.140947		7.45925	4.44418	0.203127
7.46645	4.17433	-0.0226378		7.46645	4.15969	-0.022769		7.46645	4.19128	0.0215113		7.46645	4.18118	-0.00286698		7.46645	4.22529	0.0357687		7.46645	4.21672	0.036782		7.46645	4.22813	0.0774443		7.46645	4.26252	0.0715852		7.46645	4.2894	0.106198		7.46645	4.32444	0.138062		7.46645	4.447	0.205946
7.47365	4.17336	-0.0236154		7.47365	4.15695	-0.0255108		7.47365	4.19144	0.0216722		7.47365	4.17702	-0.00703335		7.47365	4.2213	0.0317812		7.47365	4.21458	0.0346422		7.47365	4.22489	0.0742018		7.47365	4.26337	0.0724316		7.47365	4.28764	0.104439		7.47365	4.32118	0.134802		7.47365	4.44713	0.206071
7.48085	4.17105	-0.0259221		7.48085	4.15508	-0.0273824		7.48085	4.19146	0.0216901		7.48085	4.17417	-0.00987649		7.48085	4.21725	0.0277281		7.48085	4.21255	0.0326097		7.48085	4.22167	0.0709772		7.48085	4.26344	0.0724971		7.48085	4.28472	0.101513		7.48085	4.31791	0.13153		7.48085	4.44452	0.203466
7.48805	4.16781	-0.0291586		7.48805	4.1545	-0.0279665		7.48805	4.19133	0.021565		7.48805	4.17284	-0.0112057		7.48805	4.21343	0.0239074		7.48805	4.21092	0.0309765		7.48805	4.21867	0.0679791		7.48805	4.26273	0.0717878		7.48805	4.28094	0.0977397		7.48805	4.31499	0.128609		7.48805	4.43957	0.198519
7.49525	4.16424	-0.0327289		7.49525	4.1555	-0.0269592		7.49525	4.19106	0.0212908		7.49525	4.17286	-0.0111938		7.49525	4.21022	0.0207007		7.49525	4.20997	0.0300288		7.49525	4.21612	0.065434		7.49525	4.26137	0.0704348		7.49525	4.27672	0.0935137		7.49525	4.31281	0.126427		7.49525	4.43307	0.19201
7.50245	4.16099	-0.0359774		7.50245	4.15817	-0.0242949		7.50245	4.19062	0.0208557		7.50245	4.17382	-0.0102341		7.50245	4.20794	0.0184238		7.50245	4.20986	0.0299156		7.50245	4.21423	0.0635445		7.50245	4.2596	0.0686586		7.50245	4.27248	0.0892818		7.50245	4.3117	0.125319		7.50245	4.42603	0.184977
7.50965	4.15869	-0.0382841		7.50965	4.16223	-0.0202298		7.50965	4.19008	0.0203133		7.50965	4.17524	-0.00880957		7.50965	4.20668	0.0171542		7.50965	4.21051	0.0305712		7.50965	4.21306	0.0623703		7.50965	4.25768	0.0667453		7.50965	4.26863	0.0854313		7.50965	4.31183	0.12545		7.50965	4.41949	0.178438
7.51685	4.15779	-0.0391841		7.51685	4.16726	-0.0152051		7.51685	4.18952	0.019753		7.51685	4.17674	-0.00730753		7.51685	4.20625	0.016731		7.51685	4.21169	0.0317514		7.51685	4.21256	0.0618756		7.51685	4.25586	0.0649154		7.51685	4.26548	0.0822723		7.51685	4.31304	0.12666		7.51685	4.41423	0.173175
7.52405	4.15851	-0.0384629		7.52405	4.17282	-0.00964403		7.52405	4.18907	0.0193059		7.52405	4.17801	-0.00604391		7.52405	4.20647	0.0169516		7.52405	4.21311	0.033164		7.52405	4.21258	0.0618875		7.52405	4.25417	0.0632346		7.52405	4.26312	0.0799179		7.52405	4.31491	0.128525		7.52405	4.41072	0.169665
7.53125	4.16079	-0.036186		7.53125	4.17856	-0.0039041		7.53125	4.18886	0.0190914		7.53125	4.17891	-0.00513792		7.53125	4.20712	0.0176013		7.53125	4.2145	0.0345588		7.53125	4.21289	0.0621974		7.53125	4.25257	0.0616312		7.53125	4.26151	0.0783086		7.53125	4.31698	0.1306		7.53125	4.40913	0.168079
7.53845	4.1643	-0.0326753		7.53845	4.18413	0.00166297		7.53845	4.18894	0.0191748		7.53845	4.17948	-0.00457168		7.53845	4.20802	0.0184953		7.53845	4.21571	0.0357628		7.53845	4.21326	0.062567		7.53845	4.25094	0.059998		7.53845	4.26056	0.0773609		7.53845	4.31895	0.132567		7.53845	4.40939	0.168335
7.54565	4.16859	-0.0283778		7.54565	4.18914	0.00667572		7.54565	4.18934	0.0195682		7.54565	4.17989	-0.00415444		7.54565	4.20884	0.0193179		7.54565	4.21661	0.0366688		7.54565	4.21341	0.062722		7.54565	4.24915	0.0582099		7.54565	4.26021	0.0770032		7.54565	4.3207	0.134319		7.54565	4.41112	0.170064
7.55285	4.17317	-0.0238001		7.55285	4.19322	0.0107527		7.55285	4.1899	0.0201344		7.55285	4.1804	-0.00365377		7.55285	4.2091	0.0195742		7.55285	4.21718	0.037235		7.55285	4.21313	0.0624418		7.55285	4.24709	0.0561476		7.55285	4.26039	0.0771821		7.55285	4.32222	0.135845		7.55285	4.41374	0.172681
7.56005	4.17759	-0.0193775		7.56005	4.1961	0.0136316		7.56005	4.19045	0.0206828		7.56005	4.18113	-0.00292063		7.56005	4.20837	0.0188529		7.56005	4.2174	0.0374615		7.56005	4.2123	0.0616133		7.56005	4.24465	0.0537097		7.56005	4.26103	0.0778258		7.56005	4.32361	0.137228		7.56005	4.41647	0.175411
7.56725	4.1815	-0.0154674		7.56725	4.19783	0.0153661		7.56725	4.19078	0.0210106		7.56725	4.18212	-0.00193119		7.56725	4.20654	0.0170171		7.56725	4.21732	0.0373781		7.56725	4.21095	0.0602663		7.56725	4.24179	0.0508487		7.56725	4.26196	0.0787616		7.56725	4.32496	0.138581		7.56725	4.41858	0.177521
7.57445	4.18468	-0.0122964		7.57445	4.19864	0.0161767		7.57445	4.19075	0.0209808		7.57445	4.18321	-0.000840426		7.57445	4.2038	0.0142753		7.57445	4.21689	0.0369489		7.57445	4.20927	0.0585794		7.57445	4.23866	0.0477195		7.57445	4.26305	0.0798464		7.57445	4.32648	0.140101		7.57445	4.41953	0.178474
7.58165	4.18701	-0.0099659		7.58165	4.19877	0.0163078		7.58165	4.19029	0.0205219		7.58165	4.18413	7.7486e-05		7.58165	4.20052	0.011003		7.58165	4.21603	0.0360906		7.58165	4.20748	0.0567913		7.58165	4.2356	0.0446558		7.58165	4.26419	0.0809848		7.58165	4.32839	0.142014		7.58165	4.41912	0.178063
7.58885	4.18858	-0.00839233		7.58885	4.1984	0.0159323		7.58885	4.18934	0.0195682		7.58885	4.18466	0.000607967		7.58885	4.19713	0.00761151		7.58885	4.21465	0.0347078		7.58885	4.20582	0.0551343		7.58885	4.23294	0.0419974		7.58885	4.2654	0.0821948		7.58885	4.33085	0.14447		7.58885	4.41742	0.176364
7.59605	4.18959	-0.00738502		7.59605	4.19756	0.0150979		7.59605	4.18786	0.018096		7.59605	4.18471	0.000655651		7.59605	4.19394	0.00442266		7.59605	4.21273	0.0327826		7.59605	4.20449	0.0538051		7.59605	4.2309	0.0399649		7.59605	4.26675	0.0835478		7.59605	4.33376	0.147378		7.59605	4.41468	0.173628
7.60325	4.19024	-0.00672936		7.60325	4.19629	0.0138283		7.60325	4.18597	0.0162005		7.60325	4.18439	0.000339746		7.60325	4.19128	0.00175834		7.60325	4.21028	0.0303328		7.60325	4.20359	0.0529051		7.60325	4.22959	0.0386536		7.60325	4.26831	0.0851095		7.60325	4.33682	0.150436		7.60325	4.41126	0.170201
7.61045	4.19073	-0.00624657		7.61045	4.19469	0.0122309		7.61045	4.18381	0.0140429		7.61045	4.18395	-0.000101328		7.61045	4.18947	-5.36442e-05		7.61045	4.20735	0.0274062		7.61045	4.20316	0.05247		7.61045	4.22904	0.0381052		7.61045	4.27008	0.0868738		7.61045	4.33967	0.153285		7.61045	4.40753	0.16647
7.61765	4.19114	-0.00582933		7.61765	4.19288	0.0104189		7.61765	4.18159	0.0118256		7.61765	4.18366	-0.000393391		7.61765	4.18878	-0.000745058		7.61765	4.20408	0.0241339		7.61765	4.20318	0.0524938		7.61765	4.22932	0.0383794		7.61765	4.27198	0.0887752		7.61765	4.34193	0.15555		7.61765	4.40394	0.162882
7.62485	4.1916	-0.00537634		7.62485	4.19093	0.00846386		7.62485	4.17939	0.00962019		7.62485	4.18369	-0.000357628		7.62485	4.18926	-0.0002563		7.62485	4.20069	0.0207484		7.62485	4.20363	0.0529408		7.62485	4.2304	0.0394583		7.62485	4.27391	0.0907063		7.62485	4.34328	0.156897		7.62485	4.4009	0.159848
7.63205	4.19229	-0.00468492		7.63205	4.18881	0.00634193		7.63205	4.17713	0.00736117		7.63205	4.1842	0.000154972		7.63205	4.19074	0.00121593		7.63205	4.19758	0.017637		7.63205	4.20442	0.0537336		7.63205	4.2321	0.041163		7.63205	4.27576	0.0925541		7.63205	4.34331	0.156933		7.63205	4.39867	0.157619
7.63925	4.1934	-0.00357628		7.63925	4.18649	0.00402927		7.63925	4.17472	0.00495315		7.63925	4.18526	0.00120997		7.63925	4.19285	0.00332594		7.63925	4.19522	0.0152767		7.63925	4.2054	0.0547111		7.63925	4.23421	0.043267		7.63925	4.27748	0.0942767		7.63925	4.34168	0.1553		7.63925	4.39723	0.156176
7.64645	4.195	-0.00196695		7.64645	4.18404	0.00157356		7.64645	4.17213	0.00236034		7.64645	4.18689	0.00283718		7.64645	4.19521	0.00569224		7.64645	4.194	0.0140548		7.64645	4.20637	0.0556767		7.64645	4.23654	0.0456035		7.64645	4.27905	0.0958443		7.64645	4.33814	0.151759		7.64645	4.39631	0.155258
7.65365	4.19704	6.5565e-05		7.65365	4.18162	-0.000840425		7.65365	4.16936	-0.000411272		7.65365	4.189	0.00495315		7.65365	4.19757	0.00804663		7.65365	4.19413	0.0141919		7.65365	4.20715	0.0564575		7.65365	4.23906	0.0481188		7.65365	4.28044	0.097239		7.65365	4.33277	0.146389		7.65365	4.39562	0.154567
7.66085	4.19927	0.00229478		7.66085	4.17953	-0.00293851		7.66085	4.16653	-0.00323653		7.66085	4.19138	0.00733137		7.66085	4.19982	0.0102997		7.66085	4.19569	0.0157475		7.66085	4.20766	0.0569761		7.66085	4.24172	0.0507832		7.66085	4.28163	0.0984251		7.66085	4.32593	0.139552		7.66085	4.39496	0.153905
7.66805	4.20145	0.00448227		7.66805	4.17792	-0.00454783		7.66805	4.16385	-0.00591874		7.66805	4.19373	0.00967979		7.66805	4.202	0.0124753		7.66805	4.19858	0.0186324		7.66805	4.20792	0.0572264		7.66805	4.24438	0.0534415		7.66805	4.28253	0.0993311		7.66805	4.31812	0.131738		7.66805	4.39426	0.153202
7.67525	4.20347	0.00649691		7.67525	4.17681	-0.00565052		7.67525	4.16157	-0.00819564		7.67525	4.19576	0.0117064		7.67525	4.20417	0.0146508		7.67525	4.20256	0.022614		7.67525	4.20786	0.0571668		7.67525	4.24677	0.0558317		7.67525	4.28311	0.0999033		7.67525	4.30983	0.123447		7.67525	4.39354	0.152487
7.68245	4.20521	0.00824332		7.68245	4.17613	-0.00633597		7.68245	4.15991	-0.00985861		7.68245	4.19724	0.0131905		7.68245	4.20644	0.0169158		7.68245	4.2073	0.0273585		7.68245	4.20746	0.0567675		7.68245	4.24865	0.0577092		7.68245	4.2833	0.1001		7.68245	4.30154	0.115162		7.68245	4.39292	0.151867
7.68965	4.20657	0.00959635		7.68965	4.17574	-0.0067234		7.68965	4.15899	-0.0107765		7.68965	4.198	0.0139475		7.68965	4.20882	0.0193		7.68965	4.21233	0.0323892		7.68965	4.2068	0.0561118		7.68965	4.24984	0.0589013		7.68965	4.283	0.099802		7.68965	4.29382	0.107437		7.68965	4.39253	0.151479
7.69685	4.20746	0.0104904		7.69685	4.17564	-0.00682473		7.69685	4.15877	-0.011003		7.69685	4.19791	0.0138581		7.69685	4.21131	0.0217855		7.69685	4.21719	0.0372469		7.69685	4.20617	0.055486		7.69685	4.25028	0.0593424		7.69685	4.28207	0.0988662		7.69685	4.28716	0.10078		7.69685	4.39257	0.151515
7.70405	4.20789	0.0109136		7.70405	4.17586	-0.00660419		7.70405	4.15913	-0.0106394		7.70405	4.19686	0.012809		7.70405	4.21384	0.0243187		7.70405	4.22148	0.0415325		7.70405	4.20604	0.0553489		7.70405	4.25001	0.0590742		7.70405	4.28033	0.0971258		7.70405	4.28195	0.0955701		7.70405	4.39318	0.152123
7.71125	4.20792	0.0109494		7.71125	4.17642	-0.00604391		7.71125	4.15996	-0.00980496		7.71125	4.19482	0.0107706		7.71125	4.21632	0.0267982		7.71125	4.22494	0.0450015		7.71125	4.20673	0.0560403		7.71125	4.24914	0.0582039		7.71125	4.27772	0.0945151		7.71125	4.27833	0.0919461		7.71125	4.39439	0.153339
7.71845	4.20774	0.0107646		7.71845	4.1773	-0.00516176		7.71845	4.16114	-0.00863075		7.71845	4.19186	0.00781417		7.71845	4.21854	0.0290215		7.71845	4.2275	0.0475526		7.71845	4.20834	0.0576496		7.71845	4.24783	0.0568926		7.71845	4.27431	0.0911117		7.71845	4.27621	0.0898302		7.71845	4.39612	0.155061
7.72565	4.2074	0.0104249		7.72565	4.17848	-0.00398159		7.72565	4.16248	-0.00728965		7.72565	4.1882	0.00414848		7.72565	4.22022	0.0307024		7.72565	4.22911	0.0491679		7.72565	4.21078	0.0600874		7.72565	4.24627	0.055331		7.72565	4.27035	0.087148		7.72565	4.27545	0.0890672		7.72565	4.39814	0.157088
7.73285	4.20682	0.00985265		7.73285	4.17998	-0.00247955		7.73285	4.16383	-0.00594258		7.73285	4.18418	0.00013113		7.73285	4.22097	0.0314474		7.73285	4.2299	0.0499606		7.73285	4.21387	0.0631809		7.73285	4.24461	0.053668		7.73285	4.26626	0.0830531		7.73285	4.27589	0.0895083		7.73285	4.40025	0.159192
7.74005	4.20584	0.00886917		7.74005	4.18186	-0.000602007		7.74005	4.16515	-0.0046134		7.74005	4.18022	-0.00383258		7.74005	4.22053	0.0310123		7.74005	4.23	0.0500619		7.74005	4.21744	0.0667512		7.74005	4.24291	0.0519753		7.74005	4.26249	0.0792861		7.74005	4.2774	0.0910163		7.74005	4.4022	0.161147
7.74725	4.20426	0.00728369		7.74725	4.18411	0.00164509		7.74725	4.16657	-0.00320077		7.74725	4.17671	-0.00734329		7.74725	4.21897	0.0294507		7.74725	4.2296	0.0496566		7.74725	4.22112	0.0704348		7.74725	4.24125	0.0503063		7.74725	4.25948	0.0762761		7.74725	4.27977	0.0933945		7.74725	4.40382	0.162762
7.75445	4.20195	0.00498295		7.75445	4.18658	0.00411868		7.75445	4.16822	-0.00154972		7.75445	4.17396	-0.0100911		7.75445	4.21658	0.0270545		7.75445	4.22885	0.0489116		7.75445	4.22438	0.0736952		7.75445	4.23964	0.048697		7.75445	4.25748	0.0742733		7.75445	4.28274	0.0963628		7.75445	4.40497	0.163913
7.76165	4.19893	0.00196099		7.76165	4.18906	0.00659227		7.76165	4.17014	0.000369549		7.76165	4.17213	-0.011915		7.76165	4.21373	0.0242054		7.76165	4.22786	0.0479162		7.76165	4.22668	0.07599		7.76165	4.23816	0.0472188		7.76165	4.25654	0.0733376		7.76165	4.28596	0.0995815		7.76165	4.40565	0.164592
7.76885	4.19527	-0.00169873		7.76885	4.19129	0.00882149		7.76885	4.17215	0.00237823		7.76885	4.17129	-0.0127614		7.76885	4.2107	0.0211835		7.76885	4.2267	0.0467539		7.76885	4.22772	0.0770271		7.76885	4.23691	0.0459731		7.76885	4.25655	0.0733495		7.76885	4.28908	0.102705		7.76885	4.40587	0.164819
7.77605	4.19119	-0.00578165		7.77605	4.19307	0.0106037		7.77605	4.17401	0.00424385		7.77605	4.17138	-0.0126719		7.77605	4.20762	0.018096		7.77605	4.22547	0.045526		7.77605	4.22754	0.0768542		7.77605	4.23604	0.0451028		7.77605	4.25727	0.0740647		7.77605	4.29178	0.105405		7.77605	4.40566	0.164604
7.78325	4.18699	-0.00997782		7.78325	4.19432	0.0118554		7.78325	4.17551	0.00573993		7.78325	4.17231	-0.0117421		7.78325	4.20457	0.0150442		7.78325	4.22433	0.0443876		7.78325	4.22645	0.0757635		7.78325	4.23573	0.0447869		7.78325	4.25836	0.0751555		7.78325	4.29378	0.107402		7.78325	4.40491	0.163853
7.79045	4.18303	-0.0139415		7.79045	4.19508	0.0126183		7.79045	4.17653	0.00675917		7.79045	4.17394	-0.0101089		7.79045	4.20169	0.0121653		7.79045	4.22342	0.0434756		7.79045	4.22477	0.0740826		7.79045	4.23617	0.045234		7.79045	4.25938	0.0761747		7.79045	4.29486	0.10848		7.79045	4.40353	0.16247
7.79765	4.17957	-0.0173986		7.79765	4.19549	0.0130296		7.79765	4.17701	0.00724196		7.79765	4.1761	-0.00795126		7.79765	4.19903	0.00950694		7.79765	4.2228	0.0428557		7.79765	4.22285	0.0721574		7.79765	4.2375	0.0465572		7.79765	4.25985	0.0766456		7.79765	4.29497	0.108588		7.79765	4.40143	0.160378
7.80485	4.17678	-0.0201941		7.80485	4.19568	0.0132203		7.80485	4.17687	0.00710487		7.80485	4.17855	-0.00550151		7.80485	4.19642	0.00689626		7.80485	4.22242	0.0424802		7.80485	4.22104	0.0703514		7.80485	4.23964	0.048703		7.80485	4.25951	0.0763059		7.80485	4.29417	0.107789		7.80485	4.39867	0.157619
7.81205	4.1747	-0.0222743		7.81205	4.19573	0.013268		7.81205	4.17609	0.00631809		7.81205	4.18105	-0.00300407		7.81205	4.19357	0.00405312		7.81205	4.22217	0.0422239		7.81205	4.21974	0.069052		7.81205	4.2424	0.0514627		7.81205	4.25841	0.0752032		7.81205	4.2927	0.106323		7.81205	4.3954	0.15434
7.81925	4.1733	-0.023669		7.81925	4.19567	0.0132024		7.81925	4.1747	0.00493526		7.81925	4.18338	-0.000673533		7.81925	4.19028	0.000762939		7.81925	4.2219	0.0419557		7.81925	4.21917	0.0684798		7.81925	4.24541	0.0544727		7.81925	4.25697	0.0737667		7.81925	4.29091	0.104529		7.81925	4.39182	0.150764
7.82645	4.17256	-0.0244141		7.82645	4.19551	0.0130475		7.82645	4.17289	0.00311732		7.82645	4.18544	0.00138879		7.82645	4.18667	-0.00285506		7.82645	4.2215	0.0415564		7.82645	4.21925	0.0685632		7.82645	4.24829	0.0573516		7.82645	4.25575	0.0725508		7.82645	4.28919	0.102806		7.82645	4.3883	0.147241
7.83365	4.17233	-0.0246406		7.83365	4.19533	0.0128627		7.83365	4.17092	0.00115633		7.83365	4.18718	0.0031352		7.83365	4.18312	-0.00640154		7.83365	4.22083	0.0408828		7.83365	4.21969	0.0689983		7.83365	4.25072	0.0597775		7.83365	4.25526	0.072062		7.83365	4.288	0.10162		7.83365	4.3853	0.144249
7.84085	4.17235	-0.0246167		7.84085	4.19512	0.01266		7.84085	4.16914	-0.000631809		7.84085	4.18863	0.0045836		7.84085	4.18008	-0.00944138		7.84085	4.21975	0.0398099		7.84085	4.22015	0.0694633		7.84085	4.25248	0.0615418		7.84085	4.25585	0.0726461		7.84085	4.28768	0.101298		7.84085	4.38331	0.142258
7.84805	4.17238	-0.0245929		7.84805	4.19485	0.0123858		7.84805	4.16785	-0.00191927		7.84805	4.1898	0.00575185		7.84805	4.17783	-0.0116944		7.84805	4.21823	0.0382841		7.84805	4.22047	0.0697792		7.84805	4.25351	0.062573		7.84805	4.25767	0.07447		7.84805	4.28836	0.101978		7.84805	4.38272	0.141668
7.85525	4.17222	-0.0247478		7.85525	4.19437	0.011903		7.85525	4.16731	-0.00246167		7.85525	4.19074	0.0066936		7.85525	4.17649	-0.0130355		7.85525	4.21629	0.0363469		7.85525	4.22068	0.0699937		7.85525	4.25383	0.0628948		7.85525	4.26078	0.0775754		7.85525	4.29003	0.103647		7.85525	4.38367	0.14261
7.86245	4.17182	-0.0251532		7.86245	4.19356	0.0110924		7.86245	4.16773	-0.00203848		7.86245	4.19153	0.00748038		7.86245	4.17616	-0.0133634		7.86245	4.21411	0.0341654		7.86245	4.22092	0.0702322		7.86245	4.25355	0.0626087		7.86245	4.26499	0.0817835		7.86245	4.29253	0.10615		7.86245	4.38606	0.145
7.86965	4.17112	-0.0258505		7.86965	4.19251	0.0100434		7.86965	4.16927	-0.000500679		7.86965	4.19222	0.00816584		7.86965	4.17694	-0.0125766		7.86965	4.21184	0.0319004		7.86965	4.22132	0.0706315		7.86965	4.2528	0.0618637		7.86965	4.26984	0.0866354		7.86965	4.29566	0.109279		7.86965	4.38961	0.148553
7.87685	4.17007	-0.0268996		7.87685	4.19143	0.00896454		7.87685	4.17203	0.00226498		7.87685	4.19276	0.0087142		7.87685	4.17888	-0.0106394		7.87685	4.20961	0.0296712		7.87685	4.22201	0.0713229		7.87685	4.25174	0.0607967		7.87685	4.27469	0.0914872		7.87685	4.29915	0.112766		7.87685	4.39387	0.152814
7.88405	4.16865	-0.0283241		7.88405	4.19055	0.00808835		7.88405	4.176	0.00623465		7.88405	4.19305	0.0090003		7.88405	4.18183	-0.007689		7.88405	4.2074	0.0274539		7.88405	4.22313	0.0724375		7.88405	4.2504	0.0594616		7.88405	4.27893	0.095731		7.88405	4.30273	0.116348		7.88405	4.3983	0.157243
7.89125	4.16697	-0.030005		7.89125	4.18995	0.00748634		7.89125	4.18096	0.0111938		7.89125	4.19286	0.00881553		7.89125	4.18552	-0.00400543		7.89125	4.20512	0.025177		7.89125	4.22465	0.0739634		7.89125	4.24883	0.057894		7.89125	4.28227	0.0990629		7.89125	4.30613	0.119752		7.89125	4.40233	0.161272
7.89845	4.16532	-0.0316501		7.89845	4.1895	0.00703335		7.89845	4.18649	0.0167251		7.89845	4.19208	0.00802875		7.89845	4.18968	0.000154972		7.89845	4.20274	0.0227928		7.89845	4.22642	0.0757277		7.89845	4.24702	0.056076		7.89845	4.28463	0.101423		7.89845	4.30928	0.122899		7.89845	4.40563	0.164574
7.90565	4.16408	-0.0328898		7.90565	4.18907	0.00661016		7.90565	4.19202	0.0222564		7.90565	4.19065	0.00659823		7.90565	4.19417	0.00464916		7.90565	4.20028	0.0203371		7.90565	4.22803	0.077343		7.90565	4.24502	0.0540853		7.90565	4.28617	0.102967		7.90565	4.31218	0.125802		7.90565	4.40815	0.167096
7.91285	4.1636	-0.0333726		7.91285	4.18866	0.00619292		7.91285	4.19698	0.0272095		7.91285	4.18862	0.00456572		7.91285	4.19888	0.00935793		7.91285	4.19793	0.0179827		7.91285	4.22904	0.0783563		7.91285	4.24299	0.0520468		7.91285	4.28711	0.103909		7.91285	4.31494	0.128561		7.91285	4.41006	0.169009
7.92005	4.16417	-0.0328004		7.92005	4.18831	0.00584722		7.92005	4.20093	0.0311613		7.92005	4.18611	0.00206232		7.92005	4.20365	0.0141263		7.92005	4.19589	0.0159502		7.92005	4.22915	0.0784576		7.92005	4.24111	0.0501692		7.92005	4.28767	0.104463		7.92005	4.31767	0.131285		7.92005	4.41169	0.17063
7.92725	4.16597	-0.0310063		7.92725	4.18808	0.00562072		7.92725	4.2036	0.0338316		7.92725	4.18327	-0.00077486		7.92725	4.20824	0.0187159		7.92725	4.19439	0.0144482		7.92725	4.22831	0.0776231		7.92725	4.23962	0.0486791		7.92725	4.28806	0.104856		7.92725	4.32034	0.133955		7.92725	4.41335	0.172299
7.93445	4.16895	-0.0280201		7.93445	4.1879	0.00543594		7.93445	4.20486	0.0350893		7.93445	4.18033	-0.00371933		7.93445	4.21242	0.0228941		7.93445	4.1936	0.0136614		7.93445	4.22688	0.0761867		7.93445	4.23874	0.0478029		7.93445	4.2885	0.105298		7.93445	4.32291	0.13653		7.93445	4.41545	0.174391
7.94165	4.17295	-0.0240266		7.94165	4.18768	0.00521541		7.94165	4.20468	0.0349164		7.94165	4.17757	-0.00647902		7.94165	4.21603	0.0265062		7.94165	4.19372	0.0137746		7.94165	4.2254	0.0747085		7.94165	4.23865	0.0477135		7.94165	4.2891	0.1059		7.94165	4.32529	0.138915		7.94165	4.41831	0.177258
7.94885	4.17759	-0.0193834		7.94885	4.18747	0.00500679		7.94885	4.2032	0.0334322		7.94885	4.17532	-0.00872612		7.94885	4.21906	0.0295341		7.94885	4.1949	0.0149608		7.94885	4.22456	0.073874		7.94885	4.23939	0.0484467		7.94885	4.28986	0.106657		7.94885	4.32735	0.140971		7.94885	4.42213	0.181079
7.95605	4.18246	-0.0145078		7.95605	4.18747	0.00500679		7.95605	4.20067	0.030899		7.95605	4.17387	-0.0101805		7.95605	4.22153	0.0320137		7.95605	4.19723	0.0172913		7.95605	4.22496	0.0742733		7.95605	4.24088	0.0499427		7.95605	4.2907	0.107497		7.95605	4.32892	0.142539		7.95605	4.42683	0.185776
7.96325	4.18716	-0.00981092		7.96325	4.18783	0.00537038		7.96325	4.19742	0.0276566		7.96325	4.17336	-0.0106931		7.96325	4.22351	0.0339925		7.96325	4.2006	0.020653		7.96325	4.22694	0.0762522		7.96325	4.24291	0.0519753		7.96325	4.29155	0.108343		7.96325	4.3299	0.143522		7.96325	4.43215	0.191092
7.97045	4.19126	-0.00571609		7.97045	4.1885	0.00603199		7.97045	4.19384	0.0240684		7.97045	4.1738	-0.010246		7.97045	4.225	0.0354826		7.97045	4.20467	0.024724		7.97045	4.2305	0.0798106		7.97045	4.24525	0.0543058		7.97045	4.29243	0.109226		7.97045	4.33032	0.143939		7.97045	4.43772	0.196666
7.97765	4.19438	-0.0025928		7.97765	4.18919	0.0067234		7.97765	4.19021	0.0204444		7.97765	4.17516	-0.00889301		7.97765	4.22603	0.0365078		7.97765	4.209	0.0290573		7.97765	4.23527	0.084579		7.97765	4.24766	0.0567198		7.97765	4.29345	0.110245		7.97765	4.33034	0.143957		7.97765	4.44329	0.202239
7.98485	4.19628	-0.000691414		7.98485	4.18956	0.00709891		7.98485	4.18677	0.0170052		7.98485	4.17732	-0.00672936		7.98485	4.22655	0.0370264		7.98485	4.21318	0.0332355		7.98485	4.24057	0.0898838		7.98485	4.25014	0.0591993		7.98485	4.29471	0.111502		7.98485	4.33021	0.143832		7.98485	4.44869	0.207639
7.99205	4.19686	-0.000113249		7.99205	4.18946	0.00699162		7.99205	4.18368	0.0139117		7.99205	4.18006	-0.00398755		7.99205	4.22648	0.0369608		7.99205	4.21691	0.0369668		7.99205	4.24566	0.0949681		7.99205	4.25279	0.0618517		7.99205	4.29625	0.113046		7.99205	4.33012	0.143743		7.99205	4.45386	0.212801
7.99925	4.19613	-0.000846386		7.99925	4.18888	0.00641942		7.99925	4.18112	0.0113547		7.99925	4.18297	-0.00107884		7.99925	4.22574	0.0362217		7.99925	4.21995	0.0400066		7.99925	4.24982	0.0991285		7.99925	4.25579	0.0648499		7.99925	4.29798	0.114781		7.99925	4.33016	0.143778		7.99925	4.45881	0.21776
8.00645	4.19413	-0.00283718		8.00645	4.18795	0.00548363		8.00645	4.17929	0.00951886		8.00645	4.18554	0.00149012		8.00645	4.22427	0.0347495		8.00645	4.22209	0.0421464		8.00645	4.25251	0.101817		8.00645	4.25923	0.068295		8.00645	4.29977	0.116563		8.00645	4.3303	0.143915		8.00645	4.4637	0.222647
8.01365	4.19101	-0.00596642		8.01365	4.18679	0.0043273		8.01365	4.17828	0.00851154		8.01365	4.18726	0.00320673		8.01365	4.22217	0.0326514		8.01365	4.22314	0.0432014		8.01365	4.25349	0.102806		8.01365	4.26309	0.0721514		8.01365	4.30146	0.118262		8.01365	4.33045	0.14407		8.01365	4.46874	0.227684
8.02085	4.18698	-0.00998974		8.02085	4.18561	0.00314713		8.02085	4.17807	0.00830293		8.02085	4.18779	0.00374317		8.02085	4.21974	0.0302196		8.02085	4.2231	0.0431597		8.02085	4.25286	0.102168		8.02085	4.26721	0.0762701		8.02085	4.30297	0.119764		8.02085	4.33054	0.14416		8.02085	4.47407	0.233012
8.02805	4.18249	-0.014478		8.02805	4.18471	0.00224113		8.02805	4.17852	0.00875592		8.02805	4.18704	0.00298619		8.02805	4.21745	0.0279307		8.02805	4.22211	0.0421703		8.02805	4.25097	0.100279		8.02805	4.27139	0.0804484		8.02805	4.30418	0.120974		8.02805	4.33044	0.144064		8.02805	4.47971	0.238651
8.03525	4.17808	-0.0188887		8.03525	4.1844	0.00193715		8.03525	4.17948	0.00971556		8.03525	4.18509	0.00104308		8.03525	4.21578	0.0262618		8.03525	4.22046	0.0405133		8.03525	4.2483	0.0976145		8.03525	4.27538	0.0844419		8.03525	4.305	0.121796		8.03525	4.33011	0.143731		8.03525	4.48551	0.244457
8.04245	4.17429	-0.0226796		8.04245	4.18489	0.00242591		8.04245	4.18084	0.0110745		8.04245	4.18221	-0.00183582		8.04245	4.21512	0.0255942		8.04245	4.21847	0.0385225		8.04245	4.24525	0.0945568		8.04245	4.27888	0.0879407		8.04245	4.30542	0.122219		8.04245	4.32959	0.143212		8.04245	4.49129	0.250238
8.04965	4.17164	-0.025332		8.04965	4.18607	0.00360608		8.04965	4.18248	0.0127137		8.04965	4.17886	-0.00519157		8.04965	4.21564	0.0261188		8.04965	4.21645	0.0365078		8.04965	4.24204	0.0913501		8.04965	4.28154	0.0905991		8.04965	4.30553	0.122327		8.04965	4.32912	0.142741		8.04965	4.49688	0.255823
8.05685	4.17053	-0.0264406		8.05685	4.1876	0.00513792		8.05685	4.18424	0.014472		8.05685	4.1756	-0.00845194		8.05685	4.21731	0.0277877		8.05685	4.21469	0.0347495		8.05685	4.2388	0.0881135		8.05685	4.2831	0.0921607		8.05685	4.30553	0.122327		8.05685	4.32906	0.142676		8.05685	4.50211	0.261056
8.06405	4.17119	-0.025779		8.06405	4.18897	0.00650883		8.06405	4.18594	0.0161767		8.06405	4.173	-0.0110447		8.06405	4.21983	0.030309		8.06405	4.21348	0.0335395		8.06405	4.23573	0.0850379		8.06405	4.2836	0.0926554		8.06405	4.30562	0.122416		8.06405	4.32973	0.143349		8.06405	4.50688	0.265825
8.07125	4.17354	-0.0234306		8.07125	4.18974	0.00727773		8.07125	4.18754	0.0177681		8.07125	4.17149	-0.0125587		8.07125	4.2227	0.0331819		8.07125	4.21304	0.0330985		8.07125	4.23306	0.0823736		8.07125	4.28336	0.092417		8.07125	4.30592	0.122714		8.07125	4.33138	0.145		8.07125	4.51108	0.270021
8.07845	4.17715	-0.0198185		8.07845	4.18959	0.00712276		8.07845	4.1891	0.0193357		8.07845	4.1712	-0.0128508		8.07845	4.22533	0.0358045		8.07845	4.21348	0.0335336		8.07845	4.23108	0.0803888		8.07845	4.28297	0.0920296		8.07845	4.30645	0.12325		8.07845	4.33406	0.147676		8.07845	4.51473	0.273675
8.08565	4.18146	-0.0155091		8.08565	4.18839	0.0059247		8.08565	4.1908	0.0210285		8.08565	4.17207	-0.0119805		8.08565	4.22714	0.0376165		8.08565	4.21475	0.0348032		8.08565	4.23	0.0793159		8.08565	4.28293	0.0919878		8.08565	4.30726	0.124055		8.08565	4.33769	0.151312		8.08565	4.51804	0.276989
8.09285	4.18589	-0.0110865		8.09285	4.1862	0.00373125		8.09285	4.19272	0.0229537		8.09285	4.17382	-0.0102282		8.09285	4.22783	0.0383139		8.09285	4.21673	0.036788		8.09285	4.23004	0.0793517		8.09285	4.28352	0.0925839		8.09285	4.30844	0.125241		8.09285	4.34217	0.155789		8.09285	4.52134	0.280285
8.10005	4.18994	-0.00702739		8.10005	4.18329	0.000822544		8.10005	4.19483	0.0250578		8.10005	4.176	-0.00804663		8.10005	4.22739	0.0378728		8.10005	4.21921	0.0392675		8.10005	4.23137	0.0806808		8.10005	4.28486	0.093925		8.10005	4.31013	0.126922		8.10005	4.34739	0.16101		8.10005	4.5249	0.283849
8.10725	4.19327	-0.00370145		8.10725	4.1801	-0.00236034		8.10725	4.19697	0.0272036		8.10725	4.17804	-0.00600815		8.10725	4.22609	0.0365734		8.10725	4.22189	0.0419438		8.10725	4.23414	0.0834465		8.10725	4.28695	0.0960112		8.10725	4.31234	0.129133		8.10725	4.35336	0.166982		8.10725	4.52886	0.287807
8.11445	4.19559	-0.00137687		8.11445	4.17719	-0.00526905		8.11445	4.19899	0.0292182		8.11445	4.17938	-0.00466704		8.11445	4.22435	0.034827		8.11445	4.22446	0.0445187		8.11445	4.23828	0.087589		8.11445	4.28972	0.0987768		8.11445	4.31506	0.131857		8.11445	4.36014	0.173759		8.11445	4.53321	0.292158
8.12165	4.19686	-0.000107288		8.12165	4.17509	-0.00737309		8.12165	4.20061	0.0308454		8.12165	4.17972	-0.00433326		8.12165	4.2226	0.0330746		8.12165	4.22661	0.0466704		8.12165	4.24343	0.0927389		8.12165	4.29291	0.101972		8.12165	4.31824	0.13504		8.12165	4.36783	0.181454		8.12165	4.5379	0.296843
8.12885	4.19724	0.000268221		8.12885	4.17415	-0.00831485		8.12885	4.20151	0.0317395		8.12885	4.17903	-0.00501871		8.12885	4.22118	0.031656		8.12885	4.22813	0.0481904		8.12885	4.24902	0.0983298		8.12885	4.29606	0.105125		8.12885	4.32189	0.138682		8.12885	4.37651	0.190127		8.12885	4.54286	0.301808
8.13605	4.19708	0.000113249		8.13605	4.17449	-0.0079751		8.13605	4.20133	0.0315607		8.13605	4.17758	-0.00647306		8.13605	4.2203	0.0307798		8.13605	4.22895	0.0490069		8.13605	4.25439	0.1037		8.13605	4.29866	0.107723		8.13605	4.32603	0.142831		8.13605	4.38609	0.199711		8.13605	4.54803	0.306976
8.14325	4.19669	-0.000280142		8.14325	4.17606	-0.00640154		8.14325	4.19984	0.0300765		8.14325	4.17567	-0.00838041		8.14325	4.22003	0.0305116		8.14325	4.22918	0.0492334		8.14325	4.25897	0.108278		8.14325	4.30036	0.109422		8.14325	4.33068	0.14748		8.14325	4.39637	0.209993		8.14325	4.55325	0.312191
8.15045	4.19618	-0.000792742		8.15045	4.17868	-0.00377893		8.15045	4.19708	0.0273108		8.15045	4.17364	-0.010407		8.15045	4.22032	0.0308037		8.15045	4.22907	0.0491261		8.15045	4.26234	0.111651		8.15045	4.30113	0.110191		8.15045	4.33571	0.152504		8.15045	4.40696	0.220585		8.15045	4.55829	0.317234
8.15765	4.19554	-0.00143647		8.15765	4.18211	-0.000357628		8.15765	4.19328	0.0235081		8.15765	4.17184	-0.012207		8.15765	4.22106	0.0315428		8.15765	4.22893	0.0489891		8.15765	4.2643	0.113606		8.15765	4.30117	0.110233		8.15765	4.34092	0.157714		8.15765	4.41731	0.230932		8.15765	4.56302	0.321966
8.16485	4.19466	-0.00231266		8.16485	4.18591	0.00345111		8.16485	4.18888	0.0191092		8.16485	4.17066	-0.0133872		8.16485	4.22215	0.0326335		8.16485	4.22909	0.04915		8.16485	4.26482	0.114131		8.16485	4.30073	0.109786		8.16485	4.34612	0.162917		8.16485	4.42685	0.240469		8.16485	4.56755	0.326496
8.17205	4.19352	-0.00345111		8.17205	4.18963	0.00717044		8.17205	4.18437	0.0146031		8.17205	4.17045	-0.0135958		8.17205	4.2235	0.0339746		8.17205	4.22984	0.049895		8.17205	4.26416	0.113475		8.17205	4.30002	0.109076		8.17205	4.35119	0.16799		8.17205	4.43509	0.248712		8.17205	4.5722	0.331146
8.17925	4.19206	-0.00491142		8.17925	4.19279	0.0103235		8.17925	4.18024	0.0104725		8.17925	4.17131	-0.0127375		8.17925	4.22494	0.0354171		8.17925	4.23132	0.0513792		8.17925	4.26278	0.112087		8.17925	4.29925	0.108314		8.17925	4.35613	0.172931		8.17925	4.44182	0.255436		8.17925	4.57747	0.336415
8.18645	4.19024	-0.00673532		8.18645	4.19509	0.0126302		8.18645	4.17691	0.00714064		8.18645	4.17301	-0.0110388		8.18645	4.22634	0.0368178		8.18645	4.2335	0.0535548		8.18645	4.26119	0.110501		8.18645	4.29869	0.107753		8.18645	4.36094	0.177741		8.18645	4.44708	0.260705		8.18645	4.58381	0.342751
8.19365	4.18805	-0.00892281		8.19365	4.19643	0.0139654		8.19365	4.17466	0.00489354		8.19365	4.1751	-0.00894666		8.19365	4.22758	0.0380635		8.19365	4.23613	0.0561833		8.19365	4.2599	0.109214		8.19365	4.2986	0.107658		8.19365	4.36559	0.18239		8.19365	4.45124	0.264859		8.19365	4.59157	0.350511
8.20085	4.18555	-0.0114202		8.20085	4.19679	0.014323		8.20085	4.17355	0.00378489		8.20085	4.17717	-0.00688434		8.20085	4.22862	0.0390947		8.20085	4.23887	0.0589311		8.20085	4.25926	0.10857		8.20085	4.29916	0.108218		8.20085	4.37005	0.186849		8.20085	4.45469	0.26831		8.20085	4.60098	0.359923
8.20805	4.18289	-0.0140786		8.20805	4.19625	0.0137866		8.20805	4.17345	0.00368357		8.20805	4.17897	-0.00508428		8.20805	4.22945	0.0399292		8.20805	4.24137	0.0614285		8.20805	4.25942	0.108731		8.20805	4.30051	0.109571		8.20805	4.37428	0.191081		8.20805	4.45789	0.271505		8.20805	4.61211	0.371057
8.21525	4.18019	-0.0167787		8.21525	4.19503	0.0125647		8.21525	4.17401	0.00424385		8.21525	4.18041	-0.00363588		8.21525	4.23006	0.0405371		8.21525	4.24337	0.0634313		8.21525	4.26043	0.109738		8.21525	4.30274	0.1118		8.21525	4.37833	0.195128		8.21525	4.46119	0.274813		8.21525	4.62488	0.383824
8.22245	4.17755	-0.0194252		8.22245	4.19343	0.0109673		8.22245	4.1748	0.00503063		8.22245	4.18144	-0.00260472		8.22245	4.23038	0.040859		8.22245	4.24485	0.0649035		8.22245	4.2622	0.111508		8.22245	4.30597	0.115031		8.22245	4.38228	0.19908		8.22245	4.46486	0.278485		8.22245	4.63893	0.397873
8.22965	4.17506	-0.0219166		8.22965	4.19177	0.00930429		8.22965	4.17539	0.00562072		8.22965	4.18202	-0.00203252		8.22965	4.23036	0.0408411		8.22965	4.24595	0.0660121		8.22965	4.26458	0.113887		8.22965	4.31033	0.119394		8.22965	4.38617	0.202966		8.22965	4.46908	0.282705		8.22965	4.6537	0.412649
8.23685	4.17289	-0.0240862		8.23685	4.19025	0.00779033		8.23685	4.17545	0.00568032		8.23685	4.1822	-0.00184774		8.23685	4.23005	0.0405252		8.23685	4.247	0.0670612		8.23685	4.26735	0.116664		8.23685	4.31591	0.124973		8.23685	4.38994	0.206733		8.23685	4.47394	0.287563		8.23685	4.66844	0.427389
8.24405	4.17127	-0.0257015		8.24405	4.18891	0.00644326		8.24405	4.17477	0.00500083		8.24405	4.18219	-0.00185967		8.24405	4.22953	0.0400126		8.24405	4.2484	0.0684559		8.24405	4.27029	0.119603		8.24405	4.32264	0.131696		8.24405	4.39351	0.210303		8.24405	4.47941	0.293028		8.24405	4.68241	0.441355
8.25125	4.1705	-0.0264704		8.25125	4.18764	0.00517368		8.25125	4.17333	0.00356436		8.25125	4.18226	-0.00178814		8.25125	4.22896	0.0394344		8.25125	4.25054	0.0705957		8.25125	4.27318	0.122494		8.25125	4.33024	0.139302		8.25125	4.39693	0.21373		8.25125	4.48548	0.299096		8.25125	4.69503	0.453979
8.25845	4.1708	-0.0261724		8.25845	4.18632	0.00385642		8.25845	4.17132	0.00154972		8.25845	4.18261	-0.00144243		8.25845	4.22832	0.0388026		8.25845	4.25367	0.0737309		8.25845	4.27584	0.125152		8.25845	4.33829	0.147349		8.25845	4.40041	0.217205		8.25845	4.49213	0.305748		8.25845	4.70603	0.46497
8.26565	4.1723	-0.0246763		8.26565	4.18473	0.00226498		8.26565	4.16909	-0.000673532		8.26565	4.18329	-0.000756979		8.26565	4.22757	0.0380516		8.26565	4.25786	0.0779212		8.26565	4.27811	0.127423		8.26565	4.34623	0.155288		8.26565	4.40416	0.220954		8.26565	4.49942	0.313038		8.26565	4.71539	0.474334
8.27285	4.17503	-0.0219405		8.27285	4.18261	0.000149012		8.27285	4.16718	-0.0025928		8.27285	4.18429	0.000244379		8.27285	4.22668	0.0371575		8.27285	4.26297	0.0830293		8.27285	4.27995	0.129265		8.27285	4.35352	0.162578		8.27285	4.40837	0.225168		8.27285	4.50741	0.321031		8.27285	4.72338	0.482327
8.28005	4.17891	-0.0180662		8.28005	4.17986	-0.00260472		8.28005	4.16608	-0.00368953		8.28005	4.18555	0.00149608		8.28005	4.22568	0.0361621		8.28005	4.26867	0.0887275		8.28005	4.28146	0.130773		8.28005	4.35966	0.168723		8.28005	4.41315	0.229943		8.28005	4.51611	0.329727		8.28005	4.73037	0.489312
8.28725	4.18355	-0.013423		8.28725	4.17661	-0.00585318		8.28725	4.16622	-0.00355244		8.28725	4.18698	0.00292659		8.28725	4.22471	0.0351846		8.28725	4.27455	0.0946105		8.28725	4.28278	0.132096		8.28725	4.36437	0.173426		8.28725	4.41861	0.235409		8.28725	4.52542	0.339037		8.28725	4.73686	0.495803
8.29445	4.18835	-0.00861883		8.29445	4.17332	-0.00914335		8.29445	4.16781	-0.00195503		8.29445	4.18845	0.00440478		8.29445	4.22386	0.0343382		8.29445	4.28012	0.100178		8.29445	4.28407	0.133383		8.29445	4.3675	0.176561		8.29445	4.42494	0.241733		8.29445	4.5352	0.348818		8.29445	4.74346	0.502402
8.30165	4.19256	-0.00441074		8.30165	4.1706	-0.0118613		8.30165	4.17089	0.00112057		8.30165	4.18978	0.00572801		8.30165	4.2232	0.0336766		8.30165	4.28484	0.104898		8.30165	4.28544	0.134754		8.30165	4.36931	0.178367		8.30165	4.43215	0.248951		8.30165	4.54528	0.358897		8.30165	4.75078	0.509721
8.30885	4.19549	-0.00147819		8.30885	4.16898	-0.0134826		8.30885	4.17527	0.00550151		8.30885	4.19074	0.00668764		8.30885	4.22274	0.0332236		8.30885	4.2883	0.108361		8.30885	4.28709	0.136405		8.30885	4.37026	0.179321		8.30885	4.44011	0.256908		8.30885	4.55552	0.369143		8.30885	4.75928	0.518221
8.31605	4.1967	-0.000274181		8.31605	4.16885	-0.0136137		8.31605	4.18053	0.0107586		8.31605	4.19122	0.00717044		8.31605	4.22254	0.033021		8.31605	4.29034	0.1104		8.31605	4.28931	0.138617		8.31605	4.37099	0.180048		8.31605	4.4485	0.2653		8.31605	4.56579	0.379413		8.31605	4.76912	0.528067
8.32325	4.19603	-0.000941753		8.32325	4.17037	-0.0120938		8.32325	4.18605	0.016278		8.32325	4.19115	0.00710487		8.32325	4.22268	0.0331581		8.32325	4.2911	0.111157		8.32325	4.29241	0.141722		8.32325	4.37207	0.181133		8.32325	4.45704	0.273836		8.32325	4.57595	0.38957		8.32325	4.78019	0.539136
8.33045	4.19366	-0.00330806		8.33045	4.17346	-0.0090003		8.33045	4.19106	0.0212967		8.33045	4.19053	0.00648499		8.33045	4.2233	0.033778		8.33045	4.29088	0.110936		8.33045	4.29652	0.145829		8.33045	4.37385	0.182909		8.33045	4.46554	0.282341		8.33045	4.58588	0.3995		8.33045	4.79217	0.551111
8.33765	4.19007	-0.00690222		8.33765	4.17773	-0.00473261		8.33765	4.19489	0.0251174		8.33765	4.18944	0.00539422		8.33765	4.22451	0.0349939		8.33765	4.28996	0.110018		8.33765	4.30152	0.150836		8.33765	4.37642	0.185484		8.33765	4.47393	0.290728		8.33765	4.59556	0.40918		8.33765	4.80475	0.563699
8.34485	4.18595	-0.0110209		8.34485	4.18243	-3.57628e-05		8.34485	4.19704	0.0272751		8.34485	4.18802	0.00396967		8.34485	4.22633	0.0368059		8.34485	4.28856	0.108618		8.34485	4.30719	0.156498		8.34485	4.37975	0.18881		8.34485	4.48201	0.298804		8.34485	4.60499	0.418609		8.34485	4.81771	0.576651
8.35205	4.18217	-0.0147998		8.35205	4.18673	0.00426173		8.35205	4.19733	0.0275612		8.35205	4.18646	0.00241399		8.35205	4.22865	0.0391245		8.35205	4.2869	0.106955		8.35205	4.31328	0.162596		8.35205	4.38368	0.192744		8.35205	4.48961	0.306404		8.35205	4.61417	0.427788		8.35205	4.83089	0.589836
8.35925	4.17956	-0.0174165		8.35925	4.18997	0.00750422		8.35925	4.19587	0.0261009		8.35925	4.185	0.000947714		8.35925	4.23129	0.041765		8.35925	4.28529	0.105351		8.35925	4.31962	0.168931		8.35925	4.38794	0.197005		8.35925	4.49657	0.313365		8.35925	4.62309	0.436705		8.35925	4.84432	0.603265
8.36645	4.17867	-0.0183046		8.36645	4.19183	0.00936389		8.36645	4.19304	0.0232756		8.36645	4.18379	-0.0002563		8.36645	4.23407	0.0445485		8.36645	4.28402	0.104082		8.36645	4.32592	0.175232		8.36645	4.39214	0.201201		8.36645	4.50284	0.319642		8.36645	4.63172	0.445342		8.36645	4.85808	0.617027
8.37365	4.17972	-0.0172555		8.37365	4.19236	0.00989437		8.37365	4.18946	0.0196934		8.37365	4.18298	-0.00107288		8.37365	4.23689	0.0473738		8.37365	4.2832	0.103253		8.37365	4.33173	0.181037		8.37365	4.39578	0.204843		8.37365	4.50844	0.325233		8.37365	4.64011	0.453728		8.37365	4.87226	0.631207
8.38085	4.18252	-0.0144541		8.38085	4.19196	0.00950098		8.38085	4.18583	0.0160635		8.38085	4.18264	-0.00141263		8.38085	4.23973	0.050205		8.38085	4.28268	0.102735		8.38085	4.33657	0.185877		8.38085	4.39851	0.207567		8.38085	4.5133	0.330096		8.38085	4.64821	0.461835		8.38085	4.88687	0.645816
8.38805	4.18658	-0.0103891		8.38805	4.19123	0.00876188		8.38805	4.18288	0.013113		8.38805	4.18277	-0.00127554		8.38805	4.24246	0.0529408		8.38805	4.2823	0.102359		8.38805	4.34006	0.18937		8.38805	4.4002	0.20926		8.38805	4.51736	0.334162		8.38805	4.65604	0.469661		8.38805	4.90175	0.6607
8.39525	4.19122	-0.00575185		8.39525	4.19074	0.00827312		8.39525	4.18116	0.0113964		8.39525	4.18336	-0.000685454		8.39525	4.24498	0.0554621		8.39525	4.28208	0.102139		8.39525	4.342	0.191313		8.39525	4.40097	0.210029		8.39525	4.52066	0.337458		8.39525	4.66353	0.477147		8.39525	4.91654	0.675488
8.40245	4.19565	-0.00131726		8.40245	4.19092	0.0084579		8.40245	4.18099	0.0112176		8.40245	4.18437	0.000315905		8.40245	4.24722	0.0577033		8.40245	4.28212	0.10218		8.40245	4.34232	0.191629		8.40245	4.401	0.210059		8.40245	4.52335	0.340146		8.40245	4.67061	0.484234		8.40245	4.9307	0.68965
8.40965	4.19909	0.00211597		8.40965	4.19189	0.00942945		8.40965	4.18236	0.0125945		8.40965	4.18572	0.00166893		8.40965	4.24929	0.0597715		8.40965	4.28252	0.102574		8.40965	4.34105	0.190365		8.40965	4.40052	0.209576		8.40965	4.5257	0.342494		8.40965	4.67721	0.490832		8.40965	4.94364	0.702584
8.41685	4.20086	0.00389218		8.41685	4.19344	0.0109732		8.41685	4.185	0.0152349		8.41685	4.18737	0.00331998		8.41685	4.25143	0.0619054		8.41685	4.28323	0.103289		8.41685	4.33834	0.187653		8.41685	4.39984	0.208896		8.41685	4.52793	0.344729		8.41685	4.68318	0.496805		8.41685	4.95476	0.7137
8.42405	4.20063	0.00365377		8.42405	4.19518	0.0127196		8.42405	4.18848	0.0187099		8.42405	4.18919	0.00514388		8.42405	4.25379	0.0642717		8.42405	4.28416	0.104213		8.42405	4.33449	0.183797		8.42405	4.39935	0.208414		8.42405	4.53019	0.346982		8.42405	4.6884	0.50202		8.42405	4.96375	0.722694
8.43125	4.19835	0.00137687		8.43125	4.19671	0.0142455		8.43125	4.19223	0.022465		8.43125	4.19098	0.00693202		8.43125	4.25632	0.0667989		8.43125	4.28525	0.105304		8.43125	4.32988	0.179189		8.43125	4.39954	0.208604		8.43125	4.53247	0.349265		8.43125	4.69282	0.506443		8.43125	4.97069	0.729638
8.43845	4.19437	-0.00260472		8.43845	4.19761	0.0151455		8.43845	4.19576	0.0259876		8.43845	4.19248	0.00843406		8.43845	4.25875	0.0692248		8.43845	4.28647	0.106525		8.43845	4.32497	0.174284		8.43845	4.40071	0.209767		8.43845	4.53475	0.351542		8.43845	4.69654	0.510162		8.43845	4.97597	0.734919
8.44565	4.18926	-0.00770688		8.44565	4.19764	0.0151753		8.44565	4.19861	0.0288427		8.44565	4.19356	0.00950694		8.44565	4.26082	0.0712991		8.44565	4.28776	0.107819		8.44565	4.32026	0.169575		8.44565	4.40285	0.211912		8.44565	4.53694	0.353736		8.44565	4.69975	0.513369		8.44565	4.98019	0.739133
8.45285	4.18378	-0.0131905		8.45285	4.19677	0.0143051		8.45285	4.20057	0.0307977		8.45285	4.19418	0.0101328		8.45285	4.26238	0.0728548		8.45285	4.28901	0.109071		8.45285	4.31623	0.165546		8.45285	4.4058	0.214863		8.45285	4.53892	0.355721		8.45285	4.70269	0.516307		8.45285	4.98396	0.7429
8.46005	4.17872	-0.0182509		8.46005	4.19528	0.012821		8.46005	4.20158	0.031811		8.46005	4.19446	0.010407		8.46005	4.26338	0.0738561		8.46005	4.29014	0.110197		8.46005	4.31337	0.162679		8.46005	4.40924	0.218302		8.46005	4.54062	0.357413		8.46005	4.70555	0.519174		8.46005	4.98782	0.746769
8.46725	4.17483	-0.0221372		8.46725	4.19373	0.0112653		8.46725	4.20176	0.0319898		8.46725	4.19449	0.0104368		8.46725	4.26382	0.0742972		8.46725	4.29119	0.111252		8.46725	4.31197	0.161278		8.46725	4.41284	0.221902		8.46725	4.54201	0.358808		8.46725	4.70859	0.522214		8.46725	4.9922	0.75115
8.47445	4.17263	-0.0243425		8.47445	4.19261	0.0101447		8.47445	4.20132	0.0315547		8.47445	4.19443	0.0103772		8.47445	4.26378	0.0742614		8.47445	4.29232	0.112379		8.47445	4.31212	0.161427		8.47445	4.41619	0.225252		8.47445	4.54323	0.36003		8.47445	4.71203	0.525647		8.47445	4.99732	0.75627
8.48165	4.17224	-0.02473		8.48165	4.19223	0.0097692		8.48165	4.20048	0.0307143		8.48165	4.19452	0.0104666		8.48165	4.26347	0.0739455		8.48165	4.29358	0.113642		8.48165	4.31371	0.163019		8.48165	4.4189	0.227958		8.48165	4.54451	0.361311		8.48165	4.71598	0.529599		8.48165	5.00313	0.762075
8.48885	4.17344	-0.0235319		8.48885	4.19268	0.0102162		8.48885	4.19946	0.029695		8.48885	4.19502	0.0109732		8.48885	4.26326	0.0737369		8.48885	4.29499	0.115043		8.48885	4.31654	0.16585		8.48885	4.4207	0.229758		8.48885	4.54611	0.362903		8.48885	4.72036	0.53398		8.48885	5.00936	0.768304
8.49605	4.17571	-0.021261		8.49605	4.19381	0.0113428		8.49605	4.19845	0.0286818		8.49605	4.1962	0.0121474		8.49605	4.26354	0.074017		8.49605	4.29649	0.116551		8.49605	4.32037	0.169683		8.49605	4.42164	0.2307		8.49605	4.5482	0.365001		8.49605	4.72489	0.53851		8.49605	5.01563	0.774574
8.50325	4.17843	-0.018543		8.50325	4.19542	0.0129521		8.50325	4.19759	0.0278234		8.50325	4.19815	0.0140965		8.50325	4.26453	0.0750065		8.50325	4.29813	0.118184		8.50325	4.32487	0.174183		8.50325	4.42202	0.231081		8.50325	4.55092	0.367713		8.50325	4.72913	0.542748		8.50325	5.02164	0.780582
8.51045	4.18099	-0.015986		8.51045	4.19729	0.0148237		8.51045	4.197	0.0272334		8.51045	4.20077	0.0167251		8.51045	4.26618	0.0766575		8.51045	4.29987	0.119925		8.51045	4.32965	0.178957		8.51045	4.42223	0.23129		8.51045	4.55422	0.371021		8.51045	4.73266	0.546277		8.51045	5.02722	0.786161
8.51765	4.18285	-0.0141263		8.51765	4.19911	0.0166416		8.51765	4.19674	0.0269711		8.51765	4.20383	0.0197828		8.51765	4.26819	0.0786722		8.51765	4.30164	0.121695		8.51765	4.33427	0.183582		8.51765	4.42264	0.231701		8.51765	4.55796	0.374752		8.51765	4.73512	0.548744		8.51765	5.03228	0.791228
8.52485	4.18359	-0.0133812		8.52485	4.20055	0.018084		8.52485	4.19685	0.0270784		8.52485	4.20695	0.0229001		8.52485	4.27015	0.0806272		8.52485	4.30332	0.123382		8.52485	4.33841	0.187719		8.52485	4.42353	0.232595		8.52485	4.56187	0.378668		8.52485	4.73635	0.549966		8.52485	5.03677	0.795716
8.53205	4.18305	-0.0139236		8.53205	4.20132	0.0188529		8.53205	4.19731	0.0275373		8.53205	4.20972	0.0256658		8.53205	4.27157	0.0820458		8.53205	4.30481	0.124866		8.53205	4.34189	0.191206		8.53205	4.4252	0.234264		8.53205	4.56564	0.382435		8.53205	4.73628	0.549901		8.53205	5.04064	0.799584
8.53925	4.18137	-0.0155985		8.53925	4.20126	0.0187933		8.53925	4.1981	0.0283301		8.53925	4.21174	0.0276923		8.53925	4.272	0.0824749		8.53925	4.30607	0.126123		8.53925	4.3447	0.194007		8.53925	4.42791	0.23697		8.53925	4.56899	0.385791		8.53925	4.73504	0.548661		8.53925	5.04391	0.802851
8.54645	4.17901	-0.0179589		8.54645	4.20034	0.0178754		8.54645	4.19918	0.0294089		8.54645	4.21265	0.0285983		8.54645	4.27117	0.0816464		8.54645	4.30716	0.127214		8.54645	4.34686	0.196171		8.54645	4.43166	0.240719		8.54645	4.57168	0.388473		8.54645	4.73287	0.546485		8.54645	5.0467	0.80564
8.55365	4.17655	-0.0204265		8.55365	4.19861	0.0161469		8.55365	4.20042	0.0306547		8.55365	4.21215	0.0281036		8.55365	4.26908	0.0795603		8.55365	4.3081	0.128156		8.55365	4.3484	0.197715		8.55365	4.43617	0.245231		8.55365	4.57354	0.390339		8.55365	4.73021	0.543827		8.55365	5.04915	0.808096
8.56085	4.17445	-0.0225186		8.56085	4.19608	0.0136197		8.56085	4.20166	0.0318944		8.56085	4.2101	0.0260532		8.56085	4.26599	0.0764728		8.56085	4.30886	0.128913		8.56085	4.34934	0.19865		8.56085	4.44096	0.250018		8.56085	4.57454	0.39134		8.56085	4.72764	0.541264		8.56085	5.05128	0.810224
8.56805	4.17307	-0.0239015		8.56805	4.1928	0.0103354		8.56805	4.20269	0.0329196		8.56805	4.20657	0.0225186		8.56805	4.26229	0.0727713		8.56805	4.30931	0.129366		8.56805	4.34969	0.199002		8.56805	4.44549	0.254548		8.56805	4.57469	0.391483		8.56805	4.72575	0.539374		8.56805	5.05299	0.811934
8.57525	4.17261	-0.0243604		8.57525	4.18885	0.00638366		8.57525	4.20331	0.0335455		8.57525	4.20187	0.0178158		8.57525	4.25838	0.0688612		8.57525	4.30933	0.129384		8.57525	4.34949	0.198805		8.57525	4.4493	0.258356		8.57525	4.57404	0.39084		8.57525	4.72493	0.538546		8.57525	5.05416	0.813109
8.58245	4.1732	-0.0237763		8.58245	4.18447	0.00200868		8.58245	4.20348	0.0337124		8.58245	4.19651	0.0124574		8.58245	4.25458	0.0650585		8.58245	4.30878	0.128835		8.58245	4.34877	0.198084		8.58245	4.45201	0.261068		8.58245	4.5727	0.389498		8.58245	4.72522	0.538838		8.58245	5.0548	0.81374
8.58965	4.1749	-0.0220716		8.58965	4.18006	-0.00240803		8.58965	4.20324	0.033468		8.58965	4.19115	0.00710487		8.58965	4.25114	0.0616193		8.58965	4.30757	0.127625		8.58965	4.34761	0.196922		8.58965	4.45328	0.262338		8.58965	4.57081	0.387609		8.58965	4.72645	0.540066		8.58965	5.05494	0.813884
8.59686	4.17761	-0.0193655		8.59686	4.17602	-0.00644326		8.59686	4.20272	0.0329554		8.59686	4.18648	0.00242591		8.59686	4.24824	0.0587165		8.59686	4.30563	0.125688		8.59686	4.34611	0.19542		8.59686	4.45287	0.261933		8.59686	4.56865	0.385445		8.59686	4.72834	0.541955		8.59686	5.05468	0.813627
8.60406	4.18102	-0.0159562		8.60406	4.17271	-0.00975132		8.60406	4.20203	0.032264		8.60406	4.18303	-0.00101924		8.60406	4.24591	0.056392		8.60406	4.30294	0.123		8.60406	4.34446	0.193775		8.60406	4.45082	0.259882		8.60406	4.56657	0.383371		8.60406	4.73062	0.544238		8.60406	5.05415	0.813097
8.61126	4.18468	-0.0122905		8.61126	4.17029	-0.0121713		8.61126	4.20121	0.0314414		8.61126	4.18119	-0.00286102		8.61126	4.24403	0.0545084		8.61126	4.29961	0.119668		8.61126	4.34288	0.192195		8.61126	4.44752	0.25658		8.61126	4.56491	0.381702		8.61126	4.73298	0.546604		8.61126	5.05354	0.812489
8.61846	4.18816	-0.00881553		8.61846	4.1688	-0.0136673		8.61846	4.20033	0.0305653		8.61846	4.18103	-0.003016		8.61846	4.24234	0.0528216		8.61846	4.29585	0.115907		8.61846	4.34161	0.190926		8.61846	4.44366	0.252718		8.61846	4.56387	0.380671		8.61846	4.73504	0.548661		8.61846	5.05321	0.812155
8.62566	4.1911	-0.00587106		8.62566	4.16811	-0.0143588		8.62566	4.19956	0.0297904		8.62566	4.18235	-0.00169873		8.62566	4.24063	0.051111		8.62566	4.29199	0.112051		8.62566	4.3409	0.19021		8.62566	4.43999	0.249052		8.62566	4.56358	0.380379		8.62566	4.73643	0.55005		8.62566	5.05357	0.812519
8.63286	4.19328	-0.00369549		8.63286	4.16806	-0.0144064		8.63286	4.19895	0.0291824		8.63286	4.18468	0.000625849		8.63286	4.23881	0.0492871		8.63286	4.28843	0.108486		8.63286	4.34093	0.19024		8.63286	4.43716	0.246221		8.63286	4.56405	0.38085		8.63286	4.73701	0.550628		8.63286	5.05497	0.813913
8.64006	4.1945	-0.00246763		8.64006	4.16838	-0.0140846		8.64006	4.19843	0.0286639		8.64006	4.18746	0.00340939		8.64006	4.23694	0.0474155		8.64006	4.28552	0.105578		8.64006	4.34176	0.191069		8.64006	4.43565	0.244713		8.64006	4.56527	0.382072		8.64006	4.73694	0.550562		8.64006	5.05757	0.816512
8.64726	4.19463	-0.00234246		8.64726	4.16875	-0.0137091		8.64726	4.19779	0.0280201		8.64726	4.19027	0.00622272		8.64726	4.23515	0.0456274		8.64726	4.28359	0.103647		8.64726	4.34328	0.192589		8.64726	4.43578	0.244844		8.64726	4.56714	0.383937		8.64726	4.73667	0.550288		8.64726	5.06142	0.820363
8.65446	4.19363	-0.00334382		8.65446	4.16894	-0.0135243		8.65446	4.19689	0.0271201		8.65446	4.19285	0.00880361		8.65446	4.23353	0.0440121		8.65446	4.28287	0.102925		8.65446	4.34532	0.194627		8.65446	4.43765	0.24671		8.65446	4.56945	0.386244		8.65446	4.73674	0.550359		8.65446	5.06645	0.825393
8.66166	4.19165	-0.00531673		8.66166	4.16882	-0.0136435		8.66166	4.19575	0.0259817		8.66166	4.19514	0.0110865		8.66166	4.23216	0.0426412		8.66166	4.28347	0.103527		8.66166	4.34765	0.196964		8.66166	4.44114	0.250202		8.66166	4.57203	0.388831		8.66166	4.73766	0.551277		8.66166	5.07253	0.831473
8.66886	4.18903	-0.0079453		8.66886	4.16848	-0.0139832		8.66886	4.19456	0.0247896		8.66886	4.19713	0.0130832		8.66886	4.23113	0.04161		8.66886	4.28528	0.105333		8.66886	4.35014	0.199449		8.66886	4.44589	0.254953		8.66886	4.57495	0.391746		8.66886	4.73995	0.553566		8.66886	5.07951	0.838459
8.67606	4.18615	-0.0108242		8.67606	4.16815	-0.014317		8.67606	4.19345	0.0236869		8.67606	4.19891	0.0148654		8.67606	4.23061	0.0410855		8.67606	4.28806	0.108117		8.67606	4.35266	0.201976		8.67606	4.45145	0.260514		8.67606	4.57846	0.395256		8.67606	4.74412	0.557739		8.67606	5.08733	0.846279
8.68326	4.18335	-0.0136256		8.68326	4.16805	-0.0144184		8.68326	4.19246	0.0226915		8.68326	4.20056	0.0165105		8.68326	4.2308	0.0412762		8.68326	4.29156	0.111616		8.68326	4.3552	0.204509		8.68326	4.4574	0.266463		8.68326	4.58298	0.399774		8.68326	4.7507	0.564325		8.68326	5.0961	0.855041
8.69046	4.18082	-0.0161469		8.69046	4.1684	-0.0140667		8.69046	4.19161	0.0218451		8.69046	4.20207	0.0180244		8.69046	4.2319	0.0423789		8.69046	4.29559	0.115651		8.69046	4.35773	0.207043		8.69046	4.46352	0.272584		8.69046	4.58887	0.405663		8.69046	4.76006	0.573677		8.69046	5.10613	0.865078
8.69766	4.17868	-0.0182867		8.69766	4.16932	-0.0131488		8.69766	4.19099	0.0212193		8.69766	4.2033	0.0192523		8.69766	4.23403	0.0445068		8.69766	4.30003	0.120085		8.69766	4.36034	0.209653		8.69766	4.4698	0.27886		8.69766	4.59637	0.413167		8.69766	4.77228	0.585902		8.69766	5.11791	0.87685
8.70486	4.17694	-0.0200331		8.70486	4.17081	-0.0116527		8.70486	4.19072	0.020951		8.70486	4.2039	0.0198543		8.70486	4.23722	0.0477016		8.70486	4.3047	0.124758		8.70486	4.36314	0.212455		8.70486	4.47637	0.285435		8.70486	4.60562	0.422418		8.70486	4.78718	0.600803		8.70486	5.13191	0.890857
8.71206	4.17559	-0.0213802		8.71206	4.17279	-0.00967383		8.71206	4.19082	0.0210524		8.71206	4.2035	0.019449		8.71206	4.24145	0.0519335		8.71206	4.30943	0.129491		8.71206	4.36625	0.21556		8.71206	4.48341	0.292474		8.71206	4.61661	0.433409		8.71206	4.8044	0.618023		8.71206	5.14869	0.907636
8.71926	4.17458	-0.0223875		8.71926	4.17507	-0.00739694		8.71926	4.19117	0.0213981		8.71926	4.20186	0.0178099		8.71926	4.24662	0.0571012		8.71926	4.31408	0.13414		8.71926	4.36968	0.218987		8.71926	4.49105	0.300109		8.71926	4.62921	0.446004		8.71926	4.82357	0.637186		8.71926	5.16862	0.927562
8.72646	4.17381	-0.0231624		8.72646	4.1774	-0.00506043		8.72646	4.19157	0.0218034		8.72646	4.19917	0.0151157		8.72646	4.2525	0.0629783		8.72646	4.31861	0.138664		8.72646	4.37344	0.222749		8.72646	4.4993	0.308365		8.72646	4.64314	0.459939		8.72646	4.84432	0.65794		8.72646	5.19193	0.950873
8.73366	4.17311	-0.0238657		8.73366	4.17961	-0.00285506		8.73366	4.19194	0.0221729		8.73366	4.1959	0.0118554		8.73366	4.2589	0.0693798		8.73366	4.32301	0.143063		8.73366	4.3776	0.226915		8.73366	4.5082	0.317258		8.73366	4.65811	0.474912		8.73366	4.86642	0.680035		8.73366	5.21867	0.977612
8.74086	4.17235	-0.0246167		8.74086	4.18159	-0.000876188		8.74086	4.19235	0.0225842		8.74086	4.19282	0.00876784		8.74086	4.26564	0.0761151		8.74086	4.32725	0.147307		8.74086	4.38236	0.231671		8.74086	4.51772	0.326782		8.74086	4.6739	0.490701		8.74086	4.88971	0.703335		8.74086	5.24872	1.00766
8.74806	4.17153	-0.0254393		8.74806	4.18329	0.000828505		8.74806	4.19297	0.0232041		8.74806	4.19058	0.00652671		8.74806	4.27255	0.0830293		8.74806	4.33139	0.151449		8.74806	4.38802	0.237328		8.74806	4.52793	0.336987		8.74806	4.69046	0.507259		8.74806	4.91425	0.727874		8.74806	5.28185	1.0408
8.75526	4.17076	-0.0262141		8.75526	4.18472	0.00225306		8.75526	4.19395	0.0241816		8.75526	4.18968	0.00562668		8.75526	4.27948	0.0899553		8.75526	4.33563	0.155687		8.75526	4.3949	0.244212		8.75526	4.53889	0.347948		8.75526	4.70792	0.524718		8.75526	4.9403	0.753915		8.75526	5.31783	1.07678
8.76246	4.17018	-0.0267923		8.76246	4.18587	0.00340343		8.76246	4.19541	0.0256419		8.76246	4.19028	0.00622868		8.76246	4.28621	0.0966847		8.76246	4.34035	0.160408		8.76246	4.40333	0.252646		8.76246	4.5507	0.359756		8.76246	4.72657	0.543368		8.76246	4.96829	0.781912		8.76246	5.35644	1.11539
8.76966	4.16995	-0.0270188		8.76966	4.18673	0.00426173		8.76966	4.19738	0.0276148		8.76966	4.19226	0.00820756		8.76966	4.29259	0.103068		8.76966	4.34595	0.166011		8.76966	4.41358	0.262892		8.76966	4.56362	0.372684		8.76966	4.74691	0.563711		8.76966	4.99875	0.81237		8.76966	5.39761	1.15656
8.77686	4.17019	-0.0267804		8.77686	4.18731	0.00484586		8.77686	4.19983	0.0300586		8.77686	4.19523	0.0111759		8.77686	4.2986	0.109082		8.77686	4.35277	0.172824		8.77686	4.42584	0.275147		8.77686	4.57816	0.387216		8.77686	4.76951	0.586307		8.77686	5.03213	0.845748		8.77686	5.44157	1.20052
8.78406	4.17095	-0.0260234		8.78406	4.18766	0.00519753		8.78406	4.20257	0.0328064		8.78406	4.19863	0.0145793		8.78406	4.30432	0.114799		8.78406	4.36101	0.181067		8.78406	4.4402	0.289512		8.78406	4.59502	0.404078		8.78406	4.79493	0.611728		8.78406	5.0688	0.882417		8.78406	5.48882	1.24777
8.79126	4.17228	-0.0246942		8.79126	4.1878	0.00533462		8.79126	4.20539	0.0356197		8.79126	4.20184	0.017792		8.79126	4.30984	0.120324		8.79126	4.37092	0.190979		8.79126	4.45664	0.305951		8.79126	4.61491	0.423968		8.79126	4.8237	0.6405		8.79126	5.10908	0.922698		8.79126	5.5402	1.29915
8.79846	4.17419	-0.0227809		8.79846	4.1877	0.00523329		8.79846	4.20797	0.0382006		8.79846	4.20434	0.0202954		8.79846	4.31523	0.125712		8.79846	4.38266	0.202715		8.79846	4.47496	0.324273		8.79846	4.63834	0.447404		8.79846	4.85621	0.673008		8.79846	5.1533	0.966924		8.79846	5.59669	1.35563
8.80566	4.17656	-0.0204146		8.80566	4.18735	0.00488758		8.80566	4.21008	0.0403106		8.80566	4.20593	0.0218809		8.80566	4.32063	0.131112		8.80566	4.39621	0.216269		8.80566	4.49486	0.344175		8.80566	4.66552	0.474584		8.80566	4.89281	0.709605		8.80566	5.20188	1.0155		8.80566	5.65937	1.41832
8.81286	4.17913	-0.0178456		8.81286	4.18685	0.0043869		8.81286	4.21155	0.0417829		8.81286	4.20679	0.0227392		8.81286	4.32635	0.136828		8.81286	4.4114	0.231457		8.81286	4.51606	0.365371		8.81286	4.69646	0.505525		8.81286	4.93386	0.750655		8.81286	5.25528	1.0689		8.81286	5.72944	1.48839
8.82006	4.18157	-0.0154018		8.82006	4.18641	0.00394583		8.82006	4.21236	0.0425935		8.82006	4.20747	0.0234246		8.82006	4.3328	0.143284		8.82006	4.42798	0.248039		8.82006	4.53838	0.387692		8.82006	4.73111	0.540167		8.82006	4.97968	0.796479		8.82006	5.3141	1.12772		8.82006	5.8082	1.56714
8.82726	4.18361	-0.0133574		8.82726	4.18631	0.00385046		8.82726	4.21264	0.0428736		8.82726	4.20865	0.0245988		8.82726	4.34039	0.150871		8.82726	4.44589	0.26595		8.82726	4.56188	0.411189		8.82726	4.76938	0.578445		8.82726	5.03057	0.847363		8.82726	5.37905	1.19267		8.82726	5.89684	1.65578
8.83446	4.18507	-0.011903		8.83446	4.18675	0.00428557		8.83446	4.21264	0.0428677		8.83446	4.21084	0.0267863		8.83446	4.34933	0.159806		8.83446	4.46526	0.285321		8.83446	4.58676	0.436068		8.83446	4.81119	0.620252		8.83446	5.08676	0.903559		8.83446	5.45093	1.26455		8.83446	5.99639	1.75534
8.84166	4.18583	-0.0111401		8.84166	4.18775	0.00528693		8.84166	4.2127	0.0429332		8.84166	4.21425	0.0301957		8.84166	4.35967	0.170147		8.84166	4.48632	0.306374		8.84166	4.61329	0.462604		8.84166	4.85635	0.665408		8.84166	5.14852	0.965315		8.84166	5.53055	1.34417		8.84166	6.10763	1.86658
8.84886	4.18586	-0.0111103		8.84886	4.18921	0.00674725		8.84886	4.21318	0.043416		8.84886	4.21878	0.0347316		8.84886	4.37145	0.181925		8.84886	4.50915	0.329202		8.84886	4.64182	0.491136		8.84886	4.90479	0.713855		8.84886	5.21612	1.03292		8.84886	5.61873	1.43235		8.84886	6.23119	1.99013
8.85606	4.18522	-0.011754		8.85606	4.19099	0.00852346		8.85606	4.21436	0.0445962		8.85606	4.22415	0.040096		8.85606	4.3847	0.195175		8.85606	4.53382	0.353873		8.85606	4.67271	0.522017		8.85606	4.95671	0.765771		8.85606	5.2899	1.1067		8.85606	5.71616	1.52978		8.85606	6.36773	2.12667
8.86326	4.184	-0.0129759		8.86326	4.19289	0.0104308		8.86326	4.21636	0.046587		8.86326	4.22991	0.0458598		8.86326	4.3995	0.209981		8.86326	4.56043	0.380492		8.86326	4.70635	0.555664		8.86326	5.01264	0.821704		8.86326	5.37025	1.18704		8.86326	5.82349	1.63711		8.86326	6.51807	2.27702
8.87046	4.18238	-0.0145912		8.87046	4.19466	0.0122011		8.87046	4.21914	0.0493705		8.87046	4.23558	0.0515342		8.87046	4.41595	0.226432		8.87046	4.58928	0.409335		8.87046	4.74321	0.592518		8.87046	5.07339	0.882453		8.87046	5.45775	1.27454		8.87046	5.94133	1.75495		8.87046	6.68319	2.44213
8.87766	4.18065	-0.0163257		8.87766	4.19589	0.013423		8.87766	4.2226	0.0528336		8.87766	4.24072	0.0566661		8.87766	4.43416	0.244635		8.87766	4.62064	0.440693		8.87766	4.78368	0.632989		8.87766	5.13989	0.948954		8.87766	5.55311	1.36991		8.87766	6.07043	1.88405		8.87766	6.86414	2.62309
8.88486	4.17913	-0.0178397		8.88486	4.19617	0.0137091		8.88486	4.2266	0.0568271		8.88486	4.24498	0.0609279		8.88486	4.45428	0.264764		8.88486	4.65469	0.474751		8.88486	4.82816	0.677472		8.88486	5.21311	1.02217		8.88486	5.65724	1.47404		8.88486	6.21182	2.02544		8.88486	7.06223	2.82117
8.89206	4.17807	-0.0189066		8.89206	4.19532	0.0128567		8.89206	4.23096	0.0611961		8.89206	4.24829	0.0642419		8.89206	4.4766	0.28708		8.89206	4.69146	0.511521		8.89206	4.8771	0.726408		8.89206	5.29402	1.10309		8.89206	5.77113	1.58793		8.89206	6.36683	2.18045		8.89206	7.27905	3.038
8.89926	4.17758	-0.0193954		8.89926	4.1935	0.0110388		8.89926	4.23555	0.0657797		8.89926	4.25083	0.066781		8.89926	4.50132	0.311798		8.89926	4.73096	0.551021		8.89926	4.93104	0.78035		8.89926	5.38363	1.19269		8.89926	5.89582	1.71262		8.89926	6.537	2.35062		8.89926	7.51663	3.27557
8.90646	4.17765	-0.0193238		8.90646	4.19121	0.00874996		8.90646	4.24017	0.070405		8.90646	4.25298	0.0689268		8.90646	4.52851	0.338989		8.90646	4.77334	0.5934		8.90646	4.99061	0.839919		8.90646	5.48288	1.29194		8.90646	6.0324	1.84919		8.90646	6.72399	2.53761		8.90646	7.77722	3.53616
8.91366	4.17824	-0.0187278		8.91366	4.18912	0.00665188		8.91366	4.24473	0.0749588		8.91366	4.25524	0.0711918		8.91366	4.55806	0.368536		8.91366	4.81887	0.638932		8.91366	5.05643	0.90574		8.91366	5.59255	1.40162		8.91366	6.18196	1.99875		8.91366	6.92942	2.74304		8.91366	8.06303	3.82197
8.92086	4.17933	-0.017643		8.92086	4.18788	0.0054121		8.92086	4.24917	0.0793993		8.92086	4.25808	0.0740349		8.92086	4.58976	0.400239		8.92086	4.86784	0.687897		8.92086	5.12903	0.978345		8.92086	5.71327	1.52233		8.92086	6.3455	2.1623		8.92086	7.15484	2.96846		8.92086	8.37618	4.13513
8.92806	4.18085	-0.0161231		8.92806	4.18804	0.00557899		8.92806	4.25356	0.0837922		8.92806	4.26179	0.0777423		8.92806	4.6234	0.433874		8.92806	4.9205	0.740558		8.92806	5.20876	1.05807		8.92806	5.84541	1.65447		8.92806	6.52386	2.34066		8.92806	7.40174	3.21536		8.92806	8.71873	4.47767
8.93526	4.18269	-0.0142813		8.93526	4.19003	0.00756383		8.93526	4.25806	0.0882924		8.93526	4.26654	0.0824869		8.93526	4.65879	0.469273		8.93526	4.97722	0.797278		8.93526	5.29587	1.14518		8.93526	5.98927	1.79833		8.93526	6.71774	2.53453		8.93526	7.67145	3.48507		8.93526	9.09278	4.85172
8.94246	4.1846	-0.012368		8.94246	4.19402	0.0115573		8.94246	4.26285	0.0930786		8.94246	4.27235	0.0883043		8.94246	4.69588	0.506359		8.94246	5.03858	0.858635		8.94246	5.39063	1.23994		8.94246	6.14499	1.95405		8.94246	6.92781	2.74461		8.94246	7.96507	3.77869		8.94246	9.50046	5.2594
8.94966	4.18638	-0.0105917		8.94966	4.1999	0.0174403		8.94966	4.26813	0.0983655		8.94966	4.27919	0.0951409		8.94966	4.73475	0.545233		8.94966	5.10531	0.925368		8.94966	5.49328	1.34259		8.94966	6.31267	2.12173		8.94966	7.15499	2.97179		8.94966	8.28351	4.09713		8.94966	9.94374	5.70268
8.95686	4.18801	-0.00895858		8.95686	4.20723	0.0247657		8.95686	4.27409	0.104326		8.95686	4.28703	0.102979		8.95686	4.77577	0.586247		8.95686	5.17823	0.998282		8.95686	5.60414	1.45345		8.95686	6.49258	2.30164		8.95686	7.40033	3.21712		8.95686	8.62778	4.4414		8.95686	10.4245	6.18349
8.96406	4.18972	-0.00725388		8.96406	4.21535	0.0328898		8.96406	4.28088	0.111115		8.96406	4.29584	0.111789		8.96406	4.81956	0.630039		8.96406	5.25801	1.07806		8.96406	5.72346	1.57278		8.96406	6.68528	2.49434		8.96406	7.66497	3.48177		8.96406	8.99915	4.81277		8.96406	10.945	6.70391
8.97126	4.1918	-0.00516772		8.97126	4.22364	0.0411749		8.97126	4.28858	0.118816		8.97126	4.30565	0.121599		8.97126	4.86681	0.677294		8.97126	5.3452	1.16525		8.97126	5.85151	1.70082		8.97126	6.89174	2.7008		8.97126	7.9501	3.76689		8.97126	9.39921	5.21283		8.97126	11.5076	7.26658
8.97846	4.19452	-0.00245571		8.97846	4.23164	0.0491738		8.97846	4.29722	0.127453		8.97846	4.3166	0.132555		8.97846	4.91815	0.728631		8.97846	5.44018	1.26024		8.97846	5.98872	1.83803		8.97846	7.11318	2.92224		8.97846	8.25691	4.0737		8.97846	9.82989	5.64351		8.97846	12.1158	7.87473
8.98566	4.198	0.0010252		8.98566	4.23912	0.0566542		8.98566	4.30675	0.136983		8.98566	4.32897	0.144923		8.98566	4.97396	0.784439		8.98566	5.54315	1.36321		8.98566	6.13574	1.98506		8.98566	7.35092	3.15998		8.98566	8.58678	4.40357		8.98566	10.2934	6.107		8.98566	12.773	8.53199
8.99286	4.20227	0.00529885		8.99286	4.24607	0.0636101		8.99286	4.31712	0.147355		8.99286	4.34307	0.159025		8.99286	5.03445	0.844932		8.99286	5.65411	1.47417		8.99286	6.29326	2.14257		8.99286	7.60623	3.41529		8.99286	8.94125	4.75804		8.99286	10.7921	6.60571		8.99286	13.4832	9.24218
9.00006	4.20734	0.0103712		9.00006	4.25269	0.0702262		9.00006	4.3282	0.158435		9.00006	4.35927	0.17522		9.00006	5.09972	0.910199		9.00006	5.77302	1.59308		9.00006	6.46182	2.31113		9.00006	7.88034	3.6894		9.00006	9.32187	5.13867		9.00006	11.3286	7.14223		9.00006	14.2502	10.0091
9.00726	4.21309	0.0161171		9.00726	4.25927	0.0768065		9.00726	4.33987	0.170106		9.00726	4.37786	0.19381		9.00726	5.16974	0.980222		9.00726	5.89983	1.71989		9.00726	6.64178	2.49109		9.00726	8.17437	3.98343		9.00726	9.73004	5.54684		9.00726	11.9056	7.71922		9.00726	15.0777	10.8367
9.01446	4.2192	0.0222325		9.01446	4.26617	0.0837088		9.01446	4.35202	0.182253		9.01446	4.39897	0.214922		9.01446	5.24441	1.05489		9.01446	6.03456	1.85462		9.01446	6.83339	2.6827		9.01446	8.48922	4.29828		9.01446	10.167	5.98379		9.01446	12.5256	8.3392		9.01446	15.9698	11.7287
9.02166	4.22525	0.0282824		9.02166	4.27371	0.0912428		9.02166	4.36465	0.194877		9.02166	4.42254	0.23849		9.02166	5.32358	1.13406		9.02166	6.17729	1.99735		9.02166	7.03704	2.88635		9.02166	8.82547	4.63453		9.02166	10.634	6.45078		9.02166	13.1908	9.00444		9.02166	16.93	12.6889
9.02886	4.2309	0.0339329		9.02886	4.28203	0.0995696		9.02886	4.37775	0.207978		9.02886	4.44823	0.26418		9.02886	5.40722	1.2177		9.02886	6.32814	2.14819		9.02886	7.25324	3.10255		9.02886	9.18359	4.99265		9.02886	11.1324	6.94917		9.02886	13.9033	9.71692		9.02886	17.9618	13.7207
9.03606	4.23606	0.0390887		9.03606	4.29119	0.108731		9.03606	4.39137	0.221604		9.03606	4.47561	0.291562		9.03606	5.49545	1.30593		9.03606	6.48726	2.30731		9.03606	7.48239	3.3317		9.03606	9.56414	5.3732		9.03606	11.6637	7.48048		9.03606	14.6646	10.4782		9.03606	19.0684	14.8274
9.04326	4.24094	0.0439644		9.04326	4.30114	0.118673		9.04326	4.40548	0.235713		9.04326	4.50422	0.320172		9.04326	5.58853	1.39901		9.04326	6.65492	2.47498		9.04326	7.72466	3.57397		9.04326	9.96798	5.77704		9.04326	12.2293	8.04608		9.04326	15.4757	11.2893		9.04326	20.253	16.012
9.05046	4.24589	0.0489175		9.05046	4.31175	0.129282		9.05046	4.41995	0.250179		9.05046	4.53365	0.349599		9.05046	5.6868	1.49728		9.05046	6.83141	2.65147		9.05046	7.98005	3.82936		9.05046	10.396	6.20508		9.05046	12.8302	8.64701		9.05046	16.337	12.1507		9.05046	21.5187	17.2776
9.05766	4.25127	0.0542939		9.05766	4.3229	0.14044		9.05766	4.43468	0.264913		9.05766	4.56352	0.379473		9.05766	5.79051	1.60099		9.05766	7.017	2.83706		9.05766	8.24857	4.09788		9.05766	10.8489	6.65796		9.05766	13.4672	9.28401		9.05766	17.2489	13.0625		9.05766	22.8683	18.6273
9.06486	4.25739	0.0604153		9.06486	4.33447	0.15201		9.06486	4.44966	0.279891		9.06486	4.59352	0.409472		9.06486	5.89983	1.71031		9.06486	7.21185	3.03191		9.06486	8.53033	4.37964		9.06486	11.3269	7.13593		9.06486	14.1408	9.95761		9.06486	18.2113	14.0249		9.06486	24.3044	20.0634
9.07206	4.26452	0.0675499		9.07206	4.34629	0.163829		9.07206	4.46501	0.29524		9.07206	4.62346	0.439411		9.07206	6.01478	1.82526		9.07206	7.41606	3.23612		9.07206	8.82548	4.67479		9.07206	11.8299	7.63891		9.07206	14.8513	10.6681		9.07206	19.2244	15.038		9.07206	25.8293	21.5882
9.07926	4.27273	0.0757575		9.07926	4.35819	0.175726		9.07926	4.48096	0.31119		9.07926	4.65337	0.469321		9.07926	6.13514	1.94561		9.07926	7.62972	3.44977		9.07926	9.13393	4.98325		9.07926	12.3575	8.16659		9.07926	15.5984	11.4152		9.07926	20.2882	16.1018		9.07926	27.4449	23.2038
9.08646	4.2818	0.0848293		9.08646	4.37002	0.187558		9.08646	4.49776	0.327992		9.08646	4.68345	0.499398		9.08646	6.26049	2.07097		9.08646	7.85281	3.67287		9.08646	9.45545	5.30476		9.08646	12.9094	8.71843		9.08646	16.3812	12.198		9.08646	21.4027	17.2163		9.08646	29.1528	24.9117
9.09366	4.29124	0.0942707		9.09366	4.38168	0.199217		9.09366	4.51556	0.345796		9.09366	4.71398	0.529933		9.09366	6.39027	2.20075		9.09366	8.08519	3.90524		9.09366	9.78974	5.63905		9.09366	13.4846	9.29363		9.09366	17.1983	13.0151		9.09366	22.5683	18.3819		9.09366	30.954	26.713
9.10086	4.30043	0.103462		9.10086	4.39312	0.210655		9.10086	4.53447	0.364697		9.10086	4.74522	0.561166		9.10086	6.5239	2.33437		9.10086	8.32634	4.1464		9.10086	10.1367	5.98602		9.10086	14.0823	9.89132		9.10086	18.0477	13.8645		9.10086	23.7856	19.5992		9.10086	32.8486	28.6075
9.10806	4.30889	0.111914		9.10806	4.40435	0.22189		9.10806	4.55441	0.384647		9.10806	4.77736	0.593311		9.10806	6.66086	2.47134		9.10806	8.57541	4.39547		9.10806	10.4962	6.3455		9.10806	14.7017	10.5108		9.10806	18.928	14.7448		9.10806	25.0556	20.8692		9.10806	34.8359	30.5949
9.11526	4.31632	0.119352		9.11526	4.4154	0.232935		9.11526	4.57519	0.405425		9.11526	4.81058	0.626528		9.11526	6.80078	2.61126		9.11526	8.83125	4.65131		9.11526	10.8679	6.71716		9.11526	15.3425	11.1515		9.11526	19.8381	15.6549		9.11526	26.3789	22.1926		9.11526	36.9151	32.6741
9.12246	4.3227	0.12573		9.12246	4.42627	0.243807		9.12246	4.59641	0.426644		9.12246	4.84497	0.66092		9.12246	6.9434	2.75388		9.12246	9.09267	4.91273		9.12246	11.2511	7.10038		9.12246	16.0043	11.8134		9.12246	20.7772	16.594		9.12246	27.7558	23.5694		9.12246	39.0853	34.8442
9.12966	4.3281	0.131124		9.12966	4.43696	0.254494		9.12966	4.61751	0.447744		9.12966	4.88058	0.696528		9.12966	7.08854	2.89901		9.12966	9.35857	5.17863		9.12966	11.645	7.49431		9.12966	16.6867	12.4958		9.12966	21.7444	17.5612		9.12966	29.1855	24.9991		9.12966	41.345	37.1039
9.13686	4.33272	0.135744		9.13686	4.44748	0.265014		9.13686	4.63798	0.468212		9.13686	4.91735	0.733304		9.13686	7.23618	3.04666		9.13686	9.628	5.44806		9.13686	12.0488	7.89809		9.13686	17.389	13.1981		9.13686	22.7392	18.556		9.13686	30.6666	26.4802		9.13686	43.6925	39.4515
9.14406	4.33689	0.139916		9.14406	4.45786	0.275391		9.14406	4.65746	0.487691		9.14406	4.95524	0.771195		9.14406	7.38634	3.19682		9.14406	9.90015	5.72021		9.14406	12.4615	8.31083		9.14406	18.11	13.9191		9.14406	23.7606	19.5774		9.14406	32.1976	28.0112		9.14406	46.1257	41.8846
9.15126	4.34102	0.144053		9.15126	4.4681	0.285637		9.15126	4.67584	0.506067		9.15126	4.99412	0.810075		9.15126	7.53899	3.34947		9.15126	10.1744	5.99442		9.15126	12.8823	8.73159		9.15126	18.8483	14.6574		9.15126	24.8078	20.6246		9.15126	33.7761	29.5897		9.15126	48.6425	44.4014
9.15846	4.34545	0.148475		9.15846	4.47822	0.295758		9.15846	4.69328	0.523508		9.15846	5.03383	0.849777		9.15846	7.69381	3.50429		9.15846	10.4502	6.27028		9.15846	13.3101	9.15943		9.15846	19.6023	15.4114		9.15846	25.8793	21.6961		9.15846	35.3995	31.2131		9.15846	51.2417	47.0007
9.16566	4.35024	0.153267		9.16566	4.48825	0.30579		9.16566	4.71021	0.540441		9.16566	5.07404	0.889993		9.16566	7.85024	3.66072		9.16566	10.7276	6.54767		9.16566	13.7442	9.59352		9.16566	20.3698	16.1788		9.16566	26.9734	22.7902		9.16566	37.0653	32.8789		9.16566	53.923	49.682
9.17286	4.35522	0.158244		9.17286	4.49836	0.315899		9.17286	4.72726	0.557488		9.17286	5.11445	0.930399		9.17286	8.00759	3.81807		9.17286	11.0065	6.82656		9.17286	14.1837	10.033		9.17286	21.1487	16.9577		9.17286	28.0881	23.9049		9.17286	38.7713	34.5849		9.17286	56.6862	52.4452
9.18006	4.36009	0.163114		9.18006	4.5088	0.326335		9.18006	4.74505	0.57528		9.18006	5.15465	0.970602		9.18006	8.16522	3.9757		9.18006	11.2866	7.1067		9.18006	14.6276	10.4769		9.18006	21.9372	17.7463		9.18006	29.2213	25.0381		9.18006	40.5155	36.3292		9.18006	59.5307	55.2896
9.18726	4.36463	0.167662		9.18726	4.51989	0.337422		9.18726	4.76407	0.594306		9.18726	5.19419	1.01014		9.18726	8.32255	4.13303		9.18726	11.5674	7.38748		9.18726	15.0746	10.9239		9.18726	22.734	18.5431		9.18726	30.3712	26.188		9.18726	42.296	38.1096		9.18726	62.4544	58.2133
9.19446	4.36876	0.171793		9.19446	4.53184	0.349373		9.19446	4.78452	0.61475		9.19446	5.2326	1.04855		9.19446	8.47912	4.2896		9.19446	11.848	7.66802		9.19446	15.5231	11.3724		9.19446	23.5379	19.347		9.19446	31.5362	27.353		9.19446	44.1105	39.9241		9.19446	65.4537	61.2127
9.20166	4.37247	0.1755		9.20166	4.54472	0.362259		9.20166	4.80633	0.636566		9.20166	5.26949	1.08544		9.20166	8.63445	4.44493		9.20166	12.1273	7.94734		9.20166	15.9716	11.8209		9.20166	24.3474	20.1565		9.20166	32.7149	28.5317		9.20166	45.9566	41.7702		9.20166	68.5236	64.2825
9.20886	4.37575	0.178778		9.20886	4.55845	0.375986		9.20886	4.82929	0.659519		9.20886	5.30468	1.12063		9.20886	8.7882	4.59868		9.20886	12.4045	8.22453		9.20886	16.4188	12.2681		9.20886	25.1609	20.9699		9.20886	33.9059	29.7227		9.20886	47.8323	43.6459		9.20886	71.6572	67.4162
9.21606	4.37863	0.181663		9.21606	4.57278	0.390321		9.21606	4.85301	0.683242		9.21606	5.33826	1.15421		9.21606	8.94017	4.75065		9.21606	12.6787	8.49877		9.21606	16.8639	12.7132		9.21606	25.977	21.7861		9.21606	35.1078	30.9246		9.21606	49.7357	45.5493		9.21606	74.8472	70.6062
9.22326	4.38125	0.18428		9.22326	4.58732	0.404853		9.22326	4.87701	0.707245		9.22326	5.3705	1.18645		9.22326	9.09041	4.90088		9.22326	12.9494	8.76945		9.22326	17.306	13.1553		9.22326	26.7952	22.6042		9.22326	36.3194	32.1362		9.22326	51.6644	47.478		9.22326	78.0853	73.8443
9.23046	4.3838	0.186831		9.23046	4.60156	0.419092		9.23046	4.90072	0.730956		9.23046	5.40182	1.21777		9.23046	9.23893	5.04941		9.23046	13.2162	9.03626		9.23046	17.7445	13.5938		9.23046	27.6151	23.4241		9.23046	37.5392	33.356		9.23046	53.6152	49.4288		9.23046	81.3633	77.1222
9.23766	4.38648	0.189507		9.23766	4.61508	0.432616		9.23766	4.92362	0.75385		9.23766	5.43268	1.24863		9.23766	9.38575	5.19623		9.23766	13.4793	9.29933		9.23766	18.1792	14.0285		9.23766	28.4363	24.2453		9.23766	38.7662	34.5829		9.23766	55.5846	51.3982		9.23766	84.6746	80.4335
9.24486	4.38942	0.192446		9.24486	4.62759	0.445127		9.24486	4.94533	0.775564		9.24486	5.46346	1.27941		9.24486	9.53074	5.34122		9.24486	13.7389	9.55899		9.24486	18.6099	14.4592		9.24486	29.2583	25.0674		9.24486	39.9992	35.816		9.24486	57.5689	53.3825		9.24486	88.0159	83.7748
9.25206	4.39268	0.195712		9.25206	4.63904	0.456572		9.25206	4.9656	0.795829		9.25206	5.49431	1.31026		9.25206	9.67365	5.48413		9.25206	13.9956	9.81563		9.25206	19.0368	14.8861		9.25206	30.081	25.89		9.25206	41.2379	37.0547		9.25206	59.565	55.3786		9.25206	91.3873	87.1462
9.25926	4.39634	0.199366		9.25926	4.64947	0.467008		9.25926	4.9842	0.814432		9.25926	5.52495	1.3409		9.25926	9.81408	5.62456		9.25926	14.2493	10.0694		9.25926	19.4595	15.3088		9.25926	30.9043	26.7134		9.25926	42.4821	38.2989		9.25926	61.5699	57.3835		9.25926	94.7907	90.5497
9.26646	4.40047	0.203502		9.26646	4.65905	0.476587		9.26646	5.00103	0.831264		9.26646	5.55478	1.37073		9.26646	9.95152	5.762		9.26646	14.5002	10.3203		9.26646	19.8774	15.7267		9.26646	31.7283	27.5373		9.26646	43.7313	39.5481		9.26646	63.5809	59.3946		9.26646	98.227	93.9859
9.27366	4.40527	0.2083		9.27366	4.66794	0.48548		9.27366	5.01606	0.846297		9.27366	5.58315	1.3991		9.27366	10.0854	5.89587		9.27366	14.748	10.568		9.27366	20.2897	16.139		9.27366	32.552	28.361		9.27366	44.9842	40.801		9.27366	65.596	61.4096		9.27366	101.693	97.4524
9.28086	4.4109	0.213933		9.28086	4.67632	0.49386		9.28086	5.02946	0.859696		9.28086	5.60955	1.4255		9.28086	10.2151	6.02561		9.28086	14.9923	10.8124		9.28086	20.6958	16.5451		9.28086	33.3733	29.1824		9.28086	46.2386	42.0554		9.28086	67.6142	63.4278		9.28086	105.185	100.944
9.28806	4.41747	0.220495		9.28806	4.68434	0.501877		9.28806	5.04147	0.871706		9.28806	5.63377	1.44972		9.28806	10.3402	6.15065		9.28806	15.2328	11.0528		9.28806	21.0956	16.9449		9.28806	34.1897	29.9988		9.28806	47.4922	43.309		9.28806	69.6362	65.4498		9.28806	108.693	104.452
9.29526	4.42486	0.227892		9.29526	4.69201	0.509542		9.29526	5.05241	0.882643		9.29526	5.65585	1.47181		9.29526	10.46	6.27047		9.29526	15.4687	11.2888		9.29526	21.4893	17.3386		9.29526	34.9988	30.8079		9.29526	48.7425	44.5593		9.29526	71.6638	67.4774		9.29526	112.211	107.97
9.30246	4.4328	0.235832		9.30246	4.69926	0.516796		9.30246	5.06263	0.89286		9.30246	5.67607	1.49202		9.30246	10.5742	6.38469		9.30246	15.6998	11.5198		9.30246	21.8777	17.727		9.30246	35.7992	31.6083		9.30246	49.9867	45.8035		9.30246	73.699	69.5126		9.30246	115.727	111.486
9.30966	4.44084	0.243866		9.30966	4.706	0.523531		9.30966	5.07246	0.902689		9.30966	5.6949	1.51085		9.30966	10.6828	6.49328		9.30966	15.9256	11.7456		9.30966	22.2612	18.1106		9.30966	36.5904	32.3995		9.30966	51.2218	47.0386		9.30966	75.7429	71.5566		9.30966	119.232	114.991
9.31686	4.44852	0.251549		9.31686	4.71221	0.529748		9.31686	5.08214	0.912368		9.31686	5.713	1.52895		9.31686	10.7862	6.5967		9.31686	16.1461	11.9662		9.31686	22.6407	18.49		9.31686	37.3724	33.1815		9.31686	52.4451	48.2619		9.31686	77.7952	73.6088		9.31686	122.716	118.475
9.32406	4.45541	0.258434		9.32406	4.71804	0.535578		9.32406	5.09169	0.921923		9.32406	5.73097	1.54693		9.32406	10.8853	6.69575		9.32406	16.3616	12.1817		9.32406	23.0165	18.8658		9.32406	38.1456	33.9547		9.32406	53.6547	49.4715		9.32406	79.8533	75.6669		9.32406	126.173	121.932
9.33126	4.46104	0.264066		9.33126	4.72365	0.541186		9.33126	5.10092	0.93115		9.33126	5.74922	1.56517		9.33126	10.9808	6.79128		9.33126	16.5725	12.3926		9.33126	23.389	19.2383		9.33126	38.9112	34.7202		9.33126	54.8503	50.6671		9.33126	81.9127	77.7263		9.33126	129.6	125.359
9.33846	4.46501	0.268036		9.33846	4.72919	0.546724		9.33846	5.10951	0.939745		9.33846	5.76773	1.58368		9.33846	11.0736	6.88409		9.33846	16.7789	12.5989		9.33846	23.7583	19.6076		9.33846	39.6707	35.4798		9.33846	56.0326	51.8494		9.33846	83.967	79.7806		9.33846	132.999	128.757
9.34566	4.46705	0.270081		9.34566	4.73473	0.552267		9.34566	5.11712	0.94735		9.34566	5.78619	1.60214		9.34566	11.1644	6.97489		9.34566	16.981	12.801		9.34566	24.1241	19.9734		9.34566	40.426	36.2351		9.34566	57.2024	53.0192		9.34566	86.0087	81.8223		9.34566	136.367	132.126
9.35286	4.46722	0.270247		9.35286	4.74027	0.557804		9.35286	5.12348	0.953716		9.35286	5.80409	1.62004		9.35286	11.2539	7.0644		9.35286	17.1789	12.999		9.35286	24.4859	20.3352		9.35286	41.1782	36.9872		9.35286	58.3604	54.1772		9.35286	88.0296	83.8432		9.35286	139.701	135.46
9.36006	4.46589	0.268918		9.36006	4.74573	0.563264		9.36006	5.12844	0.958669		9.36006	5.82104	1.63699		9.36006	11.3428	7.15324		9.36006	17.3732	13.1933		9.36006	24.8431	20.6924		9.36006	41.9271	37.7361		9.36006	59.5074	55.3242		9.36006	90.0227	85.8363		9.36006	142.994	138.753
9.36726	4.46362	0.266653		9.36726	4.75096	0.568491		9.36726	5.132	0.962228		9.36726	5.83677	1.65272		9.36726	11.4313	7.24179		9.36726	17.5642	13.3842		9.36726	25.1953	21.0446		9.36726	42.6719	38.4809		9.36726	60.6447	56.4615		9.36726	91.9835	87.7971		9.36726	146.237	141.996
9.37446	4.46101	0.264037		9.37446	4.75575	0.573283		9.37446	5.13427	0.964504		9.37446	5.85109	1.66704		9.37446	11.5195	7.32998		9.37446	17.7521	13.5722		9.37446	25.5425	21.3918		9.37446	43.4113	39.2204		9.37446	61.7737	57.5905		9.37446	93.9111	89.7247		9.37446	149.423	145.182
9.38166	4.45851	0.261539		9.38166	4.75987	0.577408		9.38166	5.13552	0.965756		9.38166	5.86377	1.67972		9.38166	11.607	7.41751		9.38166	17.937	13.7571		9.38166	25.8849	21.7342		9.38166	44.1441	39.9531		9.38166	62.8952	58.712		9.38166	95.8075	91.6211		9.38166	152.55	148.309
9.38886	4.45653	0.25956		9.38886	4.76313	0.580668		9.38886	5.13608	0.966311		9.38886	5.87461	1.69056		9.38886	11.6936	7.50403		9.38886	18.1189	13.9389		9.38886	26.2228	22.0721		9.38886	44.8688	40.6779		9.38886	64.009	59.8258		9.38886	97.676	93.4896		9.38886	155.614	151.373
9.39606	4.45539	0.258416		9.39606	4.76541	0.582945		9.39606	5.1363	0.966531		9.39606	5.88345	1.6994		9.39606	11.7788	7.58927		9.39606	18.2976	14.1177		9.39606	26.5564	22.4057		9.39606	45.5842	41.3932		9.39606	65.1138	60.9306		9.39606	99.5197	95.3333		9.39606	158.614	154.373
[truncated: 2,165 more rows]

## Sheet: titration 2370-TMR IRE1 ∆∆ TMR
run 59				run 58				run 57				run 56				run 55				run 54				run 53				run 52				run 51				run 49				run 47
[truncated: 3,474 more rows]
