# Supplementary material for: Unstructured regions in IRE1α specify BiP-mediated destabilisation of the luminal domain dimer and repression of the UPR
Source: eLife. 2019 Dec 24;8:e50793. doi: 10.7554/eLife.50793 (PMC6996924; doi:10.7554/eLife.50793)
Supplement: Figure 5—source data 1. [file elife-50793-fig5-data1.xlsx]

## Sheet: rep1
2018-10-14	raw data
wt IRE1		dd IRE1
Time (s)	Displacement	Time (s)	Displacement
0	0	0	0	loading of proteins to tip
0.2	-0.00730065	0.2	-0.0108103
0.4	-0.0168983	0.4	-0.0163266
0.6	-0.0277938	0.6	-0.0313112
0.8	-0.0316963	0.8	-0.0328532
1	-0.0401077	1	-0.0375091
1.2	-0.0445055	1.2	-0.0390443
1.39	-0.0442809	1.39	-0.0425256
1.6	-0.0491431	1.6	-0.0426213
1.79	-0.0530055	1.79	-0.0437514
1.99	-0.0530957	1.99	-0.0423379
2.19	-0.0556825	2.19	-0.0429872
2.39	-0.0566891	2.39	-0.0380493
2.59	-0.0585253	2.59	-0.0385498
2.79	-0.0585024	2.79	-0.0346325
2.99	-0.057962	2.99	-0.0334954
3.19	-0.0573811	3.19	-0.0310144
3.39	-0.0615154	3.39	-0.0289828
3.59	-0.0564279	3.59	-0.0253728
3.79	-0.0579776	3.79	-0.027057
3.99	-0.0573396	3.99	-0.0235463
4.19	-0.060796	4.19	-0.0176879
4.39	-0.0582938	4.39	-0.0207912
4.59	-0.0592954	4.59	-0.0122797
4.8	-0.05304	4.8	-0.0121056
4.99	-0.0527277	4.99	-0.00843267
5.19	-0.05588	5.19	-0.00846812
5.39	-0.0521196	5.39	-0.00242334
5.59	-0.0518624	5.59	0.00109427
5.8	-0.0512692	5.8	0.00035812
5.99	-0.0508994	5.99	0.00686075
6.19	-0.0486405	6.19	0.00567406
6.39	-0.0465665	6.39	0.0107317
6.59	-0.0460251	6.59	0.0100958
6.8	-0.0440382	6.8	0.0108098
6.99	-0.0442608	6.99	0.0166929
7.19	-0.0461635	7.19	0.0199134
7.39	-0.0399177	7.39	0.0252468
7.59	-0.0379994	7.59	0.0255759
7.79	-0.0396882	7.79	0.026028
7.99	-0.0371328	7.99	0.0285055
8.19	-0.0350753	8.19	0.0345188
8.39	-0.033979	8.39	0.0344849
8.59	-0.0356137	8.59	0.0409991
8.79	-0.0347235	8.79	0.0399532
8.99	-0.0328483	8.99	0.0426725
9.19	-0.0333101	9.19	0.0465314
9.39	-0.0321766	9.39	0.0486197
9.59	-0.026809	9.59	0.0515863
9.8	-0.0291046	9.8	0.051756
9.99	-0.0256999	9.99	0.059177
10.19	-0.0247584	10.19	0.0599192
10.39	-0.0283187	10.39	0.0630366
10.6	-0.0261852	10.6	0.0601398
10.8	-0.0226115	10.8	0.066154
10.99	-0.0232082	10.99	0.0686032
11.19	-0.0199382	11.19	0.0711166
11.39	-0.0174639	11.39	0.0742063
11.6	-0.0193337	11.6	0.072766
11.8	-0.0124534	11.8	0.0781698
11.99	-0.0177201	11.99	0.0746967
12.19	-0.0145835	12.19	0.079462
12.4	-0.010195	12.4	0.0845905
12.6	-0.012118	12.6	0.082825
12.79	-0.0104988	12.79	0.0873748
12.99	-0.0118719	12.99	0.0916291
13.19	-0.00850891	13.19	0.0898184
13.39	-0.00512003	13.39	0.0963793
13.59	-0.00769572	13.59	0.0935679
13.79	-0.00679144	13.79	0.0958498
13.99	-0.00183088	13.99	0.100067
14.19	-0.00589805	14.19	0.101514
14.39	-0.00609558	14.39	0.106051
14.59	-0.00129495	14.59	0.102151
14.8	-0.00075185	14.8	0.107684
14.99	-0.00451472	14.99	0.109911
15.19	-0.00021229	15.19	0.110749
15.39	-0.00042793	15.39	0.112932
15.6	0.00467406	15.6	0.114355
15.8	0.00572262	15.8	0.114391
15.99	0.00603063	15.99	0.120038
16.19	0.00891158	16.19	0.120112
16.39	0.00827717	16.39	0.121464
16.59	0.0104977	16.59	0.122362
16.79	0.00955868	16.79	0.122302
16.99	0.00950026	16.99	0.127436
17.2	0.0156629	17.2	0.129818
17.39	0.011551	17.39	0.129456
17.59	0.0148419	17.59	0.13375
17.79	0.0171178	17.79	0.133941
17.99	0.0171395	17.99	0.140669
18.19	0.0145292	18.19	0.1403
18.39	0.0173548	18.39	0.139978
18.59	0.0168388	18.59	0.145191
18.79	0.0210185	18.79	0.144754
19	0.024337	19	0.146266
19.19	0.0224028	19.19	0.147454
19.39	0.0218307	19.39	0.148976
19.59	0.0236163	19.59	0.146919
19.8	0.027348	19.8	0.149581
19.99	0.0248556	19.99	0.151313
20.19	0.0269892	20.19	0.154708
20.39	0.0278848	20.39	0.156784
20.6	0.0297556	20.6	0.159002
20.79	0.0308871	20.79	0.160709
20.99	0.0290176	20.99	0.158385
21.19	0.0302496	21.19	0.164503
21.39	0.032883	21.39	0.161621
21.59	0.0298458	21.59	0.165024
21.79	0.0396661	21.79	0.168329
21.99	0.0391857	21.99	0.169045
22.2	0.0338659	22.2	0.169868
22.4	0.0394493	22.4	0.174065
22.6	0.0427572	22.6	0.173404
22.8	0.0411886	22.8	0.177695
23	0.0398783	23	0.173748
23.2	0.0401452	23.2	0.178207
23.4	0.0428509	23.4	0.177524
23.6	0.0426346	23.6	0.182416
23.8	0.0417419	23.8	0.179934
24	0.0416046	24	0.185655
24.2	0.0418035	24.2	0.189109
24.4	0.0427142	24.4	0.186196
24.6	0.0487257	24.6	0.188614
24.79	0.0501949	24.79	0.190178
25	0.0506816	25	0.19022
25.2	0.0459883	25.2	0.193528
25.4	0.0514218	25.4	0.191347
25.6	0.0507979	25.6	0.199474
25.79	0.0532703	25.79	0.197363
26	0.0565448	26	0.196033
26.2	0.0561601	26.2	0.200459
26.4	0.0557706	26.4	0.201143
26.59	0.0566568	26.59	0.20145
26.8	0.0571334	26.8	0.202701
27	0.0563273	27	0.204733
27.2	0.059004	27.2	0.205983
27.39	0.0598004	27.39	0.210813
27.59	0.0587614	27.59	0.211022
27.8	0.0614765	27.8	0.211801
27.99	0.0619437	27.99	0.211697
28.2	0.0635061	28.2	0.215018
28.39	0.0624963	28.39	0.2163
28.6	0.0638934	28.6	0.215909
28.8	0.0670565	28.8	0.216899
29	0.0685813	29	0.221347
29.2	0.0691174	29.2	0.221598
29.39	0.0714632	29.39	0.223281
29.6	0.0691981	29.6	0.224464
29.79	0.0717819	29.79	0.225289
30	0.0725625	30	0.229282
30.2	0.0702045	30.2	0.226753
30.4	0.0728263	30.4	0.226621
30.6	0.0765253	30.6	0.228457
30.79	0.0779062	30.79	0.231038
31	0.0767512	31	0.230948
31.2	0.0780055	31.2	0.237569
31.4	0.0769606	31.4	0.234637
31.59	0.0807164	31.59	0.23747
31.8	0.0790094	31.8	0.240413
32	0.0815758	32	0.23975
32.19	0.0809788	32.19	0.239831
32.39	0.0787053	32.39	0.242268
32.59	0.0835975	32.59	0.238305
32.79	0.0827655	32.79	0.247254
32.99	0.0852433	32.99	0.246616
33.19	0.0867742	33.19	0.247519
33.39	0.0879233	33.39	0.250091
33.59	0.0865891	33.59	0.247971
33.79	0.0851102	33.79	0.249894
33.99	0.0915932	33.99	0.25462
34.19	0.0906369	34.19	0.254058
34.4	0.0917019	34.4	0.257387
34.59	0.0926512	34.59	0.254327
34.79	0.0942637	34.79	0.255889
34.99	0.0934965	34.99	0.261037
35.19	0.0897836	35.19	0.257648
35.4	0.0930302	35.4	0.263328
35.59	0.0951755	35.59	0.263804
35.79	0.0960112	35.79	0.261485
35.99	0.0971868	35.99	0.265407
36.19	0.0973168	36.19	0.268177
36.4	0.0993582	36.4	0.264461
36.59	0.101027	36.59	0.266567
36.79	0.0996998	36.79	0.26743
36.99	0.097795	36.99	0.266691
37.19	0.105845	37.19	0.272925
37.39	0.104607	37.39	0.27206
37.59	0.103443	37.59	0.274143
37.79	0.105508	37.79	0.275298
37.99	0.107021	37.99	0.275058
38.19	0.103977	38.19	0.278893
38.39	0.105175	38.39	0.279721
38.59	0.107389	38.59	0.283072
38.79	0.112393	38.79	0.27978
38.99	0.114169	38.99	0.284137
39.19	0.110128	39.19	0.284742
39.39	0.113311	39.39	0.287799
39.59	0.111992	39.59	0.284929
39.79	0.109732	39.79	0.288864
39.99	0.114779	39.99	0.289266
40.19	0.113757	40.19	0.292871
40.4	0.11625	40.4	0.291211
40.59	0.116754	40.59	0.2907
40.79	0.115998	40.79	0.293653
40.99	0.117983	40.99	0.29443
41.19	0.124272	41.19	0.291763
41.39	0.121693	41.39	0.295528
41.59	0.125154	41.59	0.298408
41.79	0.121148	41.79	0.298653
41.99	0.121592	41.99	0.300005
42.19	0.122291	42.19	0.30014
42.39	0.124524	42.39	0.304465
42.59	0.124103	42.59	0.301111
42.79	0.126869	42.79	0.302152
42.99	0.127497	42.99	0.306242
43.19	0.125652	43.19	0.308516
43.39	0.129514	43.39	0.309967
43.59	0.129081	43.59	0.311413
43.79	0.130912	43.79	0.30956
43.99	0.133613	43.99	0.312292
44.19	0.132995	44.19	0.313672
44.4	0.131835	44.4	0.312361
44.59	0.137201	44.59	0.317302
44.79	0.134121	44.79	0.319387
44.99	0.137259	44.99	0.319052
45.19	0.137063	45.19	0.31822
45.4	0.136527	45.4	0.313926
45.59	0.139224	45.59	0.321685
45.79	0.136028	45.79	0.324284
45.99	0.14044	45.99	0.322109
46.19	0.13815	46.19	0.325867
46.39	0.139123	46.39	0.327625
46.59	0.142747	46.59	0.325639
46.79	0.144011	46.79	0.324629
46.99	0.14459	46.99	0.327912
47.19	0.144877	47.19	0.330481
47.4	0.143428	47.4	0.329294
47.59	0.143418	47.59	0.330115
47.79	0.14732	47.79	0.338107
47.99	0.148539	47.99	0.337363
48.19	0.148868	48.19	0.334305
48.4	0.147805	48.4	0.333833
48.59	0.149049	48.59	0.334776
48.79	0.15308	48.79	0.337799
48.99	0.151947	48.99	0.341514
49.19	0.15449	49.19	0.344557
49.4	0.152685	49.4	0.343294
49.59	0.151713	49.59	0.346797
49.79	0.156938	49.79	0.340858
49.99	0.15396	49.99	0.344416
50.19	0.156494	50.19	0.34679
50.39	0.156924	50.39	0.347664
50.59	0.156057	50.59	0.346864
50.79	0.159016	50.79	0.3536
50.99	0.162331	50.99	0.346369
51.19	0.162716	51.19	0.351898
51.39	0.161292	51.39	0.353009
51.59	0.163175	51.59	0.354835
51.79	0.162636	51.79	0.354479
51.99	0.163986	51.99	0.357399
52.19	0.166771	52.19	0.357329
52.4	0.165652	52.4	0.354689
52.59	0.165531	52.59	0.358927
52.79	0.167273	52.79	0.362074
52.99	0.167471	52.99	0.363442
53.19	0.168518	53.19	0.3612
53.4	0.171971	53.4	0.36628
53.59	0.174813	53.59	0.366051
53.79	0.17142	53.79	0.364369
53.99	0.171365	53.99	0.363174
54.19	0.173271	54.19	0.369642
54.4	0.174283	54.4	0.367902
54.59	0.173727	54.59	0.369763
54.79	0.177279	54.79	0.37134
54.99	0.175968	54.99	0.373253
55.19	0.176696	55.19	0.374589
55.39	0.176605	55.39	0.377709
55.59	0.179126	55.59	0.377017
55.79	0.176538	55.79	0.375984
55.99	0.181723	55.99	0.381701
56.19	0.183383	56.19	0.380144
56.39	0.181606	56.39	0.379511
56.59	0.182516	56.59	0.378836
56.79	0.182809	56.79	0.38118
56.99	0.189263	56.99	0.38253
57.19	0.185933	57.19	0.379322
57.4	0.18667	57.4	0.384716
57.59	0.184308	57.59	0.389567
57.79	0.189508	57.79	0.38826
57.99	0.190765	57.99	0.389691
58.19	0.189452	58.19	0.387124
58.4	0.191177	58.4	0.39074
58.59	0.191853	58.59	0.389387
58.79	0.190726	58.79	0.394353
58.99	0.191781	58.99	0.391637
59.19	0.195868	59.19	0.395931
59.39	0.193509	59.39	0.396813
59.59	0.196435	59.59	0.395756
59.79	0.195846	59.79	0.396979
59.99	0.194225	59.99	0.401234
60.19	0.195621	60.19	0.400814
60.39	0.199374	60.39	0.40053
60.59	0.197205	60.59	0.404308
60.79	0.201827	60.79	0.404955
60.99	0.200377	60.99	0.40116
61.19	0.202544	61.19	0.402832
61.39	0.203577	61.39	0.406801
61.59	0.205919	61.59	0.404772
61.79	0.203245	61.79	0.401476
61.99	0.20498	61.99	0.408753
62.19	0.204027	62.19	0.40912
62.39	0.20468	62.39	0.412421
62.59	0.20555	62.59	0.41063
62.79	0.208519	62.79	0.412599
62.99	0.208053	62.99	0.410747
63.19	0.206962	63.19	0.416926
63.4	0.210468	63.4	0.419582
63.59	0.21009	63.59	0.417779
63.79	0.213856	63.79	0.416131
63.99	0.210687	63.99	0.422452
64.19	0.213721	64.19	0.421896
64.39	0.213618	64.39	0.420965
64.59	0.213759	64.59	0.425231
64.79	0.215886	64.79	0.424627
64.99	0.218186	64.99	0.421519
65.19	0.21692	65.19	0.427994
65.39	0.214348	65.39	0.426909
65.59	0.218485	65.59	0.428071
65.79	0.219105	65.79	0.428167
65.99	0.220583	65.99	0.427418
66.19	0.222219	66.19	0.430567
66.39	0.221685	66.39	0.426612
66.59	0.222068	66.59	0.433873
66.8	0.22577	66.8	0.436431
67	0.222358	67	0.433211
67.19	0.225541	67.19	0.434437
67.4	0.226315	67.4	0.437042
67.6	0.223886	67.6	0.44068
67.8	0.228382	67.8	0.442483
68	0.23067	68	0.4403
68.19	0.230672	68.19	0.438412
68.4	0.230978	68.4	0.443714
68.6	0.229185	68.6	0.441009
68.8	0.233166	68.8	0.443048
69	0.233296	69	0.44361
69.19	0.232142	69.19	0.445789
69.4	0.231804	69.4	0.444945
69.6	0.233881	69.6	0.449434
69.8	0.2323	69.8	0.444938
70	0.237008	70	0.446335
70.19	0.234865	70.19	0.44834
70.4	0.237338	70.4	0.451721
70.6	0.239146	70.6	0.451855
70.8	0.241779	70.8	0.457702
70.99	0.24267	70.99	0.454969
71.19	0.240294	71.19	0.454709
71.4	0.242279	71.4	0.455872
71.6	0.241577	71.6	0.456162
71.8	0.241364	71.8	0.457378
72	0.23845	72	0.460129
72.19	0.244759	72.19	0.460125
72.39	0.248777	72.39	0.459666
72.6	0.246267	72.6	0.459952
72.79	0.245823	72.79	0.462573
73	0.248946	73	0.461639
73.19	0.251739	73.19	0.469136
73.39	0.250156	73.39	0.469718
73.6	0.249586	73.6	0.468319
73.79	0.250968	73.79	0.466429
74	0.249706	74	0.469883
74.19	0.250957	74.19	0.468208
74.4	0.253249	74.4	0.469969
74.6	0.255076	74.6	0.472479
74.8	0.252554	74.8	0.476244
75	0.253099	75	0.47403
75.19	0.255869	75.19	0.476413
75.4	0.256286	75.4	0.476795
75.6	0.255972	75.6	0.477644
75.8	0.256811	75.8	0.476215
76	0.258293	76	0.476926
76.19	0.258806	76.19	0.482559
76.4	0.260364	76.4	0.480076
76.59	0.259975	76.59	0.48328
76.8	0.263272	76.8	0.482564
76.99	0.260826	76.99	0.485697
77.19	0.263266	77.19	0.483992
77.39	0.263175	77.39	0.485621
77.6	0.266138	77.6	0.48621
77.8	0.265695	77.8	0.491991
78	0.266166	78	0.486236
78.19	0.263891	78.19	0.488564
78.39	0.270289	78.39	0.491217
78.6	0.269137	78.6	0.493761
78.79	0.268324	78.79	0.494483
79	0.270927	79	0.495715
79.19	0.270968	79.19	0.496476
79.4	0.273767	79.4	0.493675
79.6	0.271574	79.6	0.495395
79.8	0.273824	79.8	0.496431
80	0.276918	80	0.497667
80.19	0.274558	80.19	0.499662
80.4	0.274904	80.4	0.500089
80.59	0.277758	80.59	0.50313
80.79	0.274477	80.79	0.503211
80.99	0.274967	80.99	0.50692
81.19	0.28066	81.19	0.505279
81.4	0.282747	81.4	0.507799
81.59	0.278215	81.59	0.507836
81.79	0.282222	81.79	0.505735
81.99	0.283419	81.99	0.50994
82.19	0.284113	82.19	0.511316
82.39	0.281785	82.39	0.511453
82.59	0.281242	82.59	0.511356
82.79	0.281646	82.79	0.514531
82.99	0.284207	82.99	0.512276
83.19	0.284281	83.19	0.51957
83.39	0.283822	83.39	0.516404
83.59	0.285861	83.59	0.51656
83.79	0.289042	83.79	0.511393
84	0.288622	84	0.520327
84.19	0.289772	84.19	0.519896
84.39	0.289323	84.39	0.518076
84.59	0.291386	84.59	0.523559
84.79	0.290752	84.79	0.517996
84.99	0.29275	84.99	0.519923
85.19	0.293974	85.19	0.523017
85.39	0.294903	85.39	0.523103
85.59	0.294349	85.59	0.524061
85.79	0.297839	85.79	0.524514
85.99	0.296952	85.99	0.526817
86.19	0.297166	86.19	0.53182
86.4	0.296762	86.4	0.528271
86.59	0.30195	86.59	0.53014
86.79	0.300245	86.79	0.532065
86.99	0.299774	86.99	0.532685
87.19	0.302688	87.19	0.535412
87.39	0.304235	87.39	0.534396
87.59	0.300531	87.59	0.533068
87.79	0.302673	87.79	0.535906
87.99	0.301608	87.99	0.539558
88.19	0.30415	88.19	0.53861
88.39	0.306167	88.39	0.540051
88.59	0.306698	88.59	0.539338
88.79	0.310534	88.79	0.543529
89	0.307095	89	0.541773
89.19	0.304124	89.19	0.544411
89.4	0.311832	89.4	0.542087
89.6	0.311625	89.6	0.543479
89.8	0.311843	89.8	0.540349
90	0.312769	90	0.54585
90.19	0.312116	90.19	0.547935
90.4	0.312764	90.4	0.548079
90.6	0.314593	90.6	0.549724
90.8	0.316424	90.8	0.550142
91	0.318851	91	0.550524
91.19	0.321345	91.19	0.554064
91.4	0.315646	91.4	0.551023
91.6	0.316117	91.6	0.555061
91.8	0.318604	91.8	0.555592
92	0.32103	92	0.558877
92.19	0.321716	92.19	0.558498
92.4	0.323422	92.4	0.558071
92.6	0.320337	92.6	0.560684
92.8	0.323743	92.8	0.562131
93	0.32228	93	0.559128
93.19	0.322231	93.19	0.566088
93.4	0.326822	93.4	0.560116
93.6	0.323396	93.6	0.561942
93.8	0.323547	93.8	0.562019
93.99	0.32725	93.99	0.565994
94.19	0.327826	94.19	0.567361
94.4	0.329905	94.4	0.567493
94.6	0.329603	94.6	0.569952
94.8	0.33297	94.8	0.56814
94.99	0.333685	94.99	0.568387
95.19	0.329158	95.19	0.566294
95.39	0.332371	95.39	0.569503
95.6	0.331515	95.6	0.570556
95.79	0.331058	95.79	0.572979
96	0.334106	96	0.574389
96.19	0.337034	96.19	0.576846
96.4	0.338611	96.4	0.578317
96.6	0.337653	96.6	0.576836
96.8	0.338413	96.8	0.579432
97	0.339724	97	0.58009
97.19	0.338724	97.19	0.578567
97.4	0.337581	97.4	0.584125
97.6	0.342051	97.6	0.586368
97.8	0.341951	97.8	0.582414
97.99	0.34281	97.99	0.58812
98.19	0.343366	98.19	0.585663
98.4	0.339903	98.4	0.582364
98.6	0.343401	98.6	0.586578
98.8	0.346044	98.8	0.589434
98.99	0.343414	98.99	0.589256
99.19	0.345613	99.19	0.589298
99.4	0.348476	99.4	0.591576
99.59	0.348273	99.59	0.593737
99.79	0.347383	99.79	0.59201
100	0.349498	100	0.596151
100.19	0.350593	100.19	0.594234
100.39	0.352351	100.39	0.597582
100.6	0.351328	100.6	0.596807
100.79	0.351635	100.79	0.595237
101	0.35267	101	0.594351
101.19	0.354719	101.19	0.600407
101.39	0.354773	101.39	0.604209
101.59	0.35208	101.59	0.600227
101.79	0.353524	101.79	0.599008
102	0.357426	102	0.602948
102.19	0.357387	102.19	0.603868
102.4	0.356361	102.4	0.606603
102.59	0.360637	102.59	0.606158
102.8	0.360592	102.8	0.609733
102.99	0.358029	102.99	0.608868
103.19	0.358111	103.19	0.609477
103.39	0.362788	103.39	0.609132
103.59	0.36135	103.59	0.611218
103.8	0.363873	103.8	0.611338
103.99	0.364472	103.99	0.610277
104.19	0.362357	104.19	0.610599
104.4	0.364636	104.4	0.615008
104.6	0.366554	104.6	0.613588
104.79	0.362791	104.79	0.61672
105	0.370984	105	0.620141
105.19	0.372277	105.19	0.61694
105.39	0.371696	105.39	0.619713
105.59	0.36696	105.59	0.61951
105.79	0.370563	105.79	0.621662
106	0.372717	106	0.621659
106.19	0.370508	106.19	0.622343
106.39	0.37378	106.39	0.628387
106.59	0.373633	106.59	0.624057
106.79	0.373862	106.79	0.625555
107	0.375957	107	0.625658
107.19	0.376588	107.19	0.630144
107.39	0.379545	107.39	0.631111
107.59	0.37848	107.59	0.628161
107.8	0.379777	107.8	0.632414
107.99	0.377586	107.99	0.62995
108.19	0.376468	108.19	0.631244
108.39	0.380868	108.39	0.635097
108.59	0.381374	108.59	0.631365
108.8	0.380236	108.8	0.638159
108.99	0.384529	108.99	0.638465
109.19	0.387222	109.19	0.6347
109.39	0.386044	109.39	0.637941
109.59	0.387983	109.59	0.638805
109.79	0.389901	109.79	0.638809
110	0.385915	110	0.642994
110.19	0.388871	110.19	0.642625
110.39	0.388557	110.39	0.644284
110.59	0.390312	110.59	0.643987
110.79	0.388482	110.79	0.644889
110.99	0.387418	110.99	0.64698
111.19	0.390528	111.19	0.644755
111.39	0.391642	111.39	0.648925
111.6	0.394852	111.6	0.648439
111.8	0.394689	111.8	0.648147
112	0.396325	112	0.650586
112.19	0.394176	112.19	0.651672
112.4	0.399287	112.4	0.648104
112.6	0.398922	112.6	0.65186
112.8	0.392331	112.8	0.652022
113	0.395321	113	0.654091
113.19	0.397475	113.19	0.66053
113.4	0.394321	113.4	0.658652
113.6	0.400506	113.6	0.660767
113.8	0.400757	113.8	0.657757
114	0.398177	114	0.659745
114.19	0.402477	114.19	0.658186
114.4	0.400898	114.4	0.65988
114.6	0.40415	114.6	0.660792
114.8	0.403954	114.8	0.663255
114.99	0.408224	114.99	0.658765
115.19	0.406501	115.19	0.666254
115.4	0.410751	115.4	0.659698
115.6	0.407032	115.6	0.665191
115.8	0.40966	115.8	0.664833
116	0.412295	116	0.667231
116.19	0.407443	116.19	0.671869
116.4	0.412159	116.4	0.667596
116.6	0.409237	116.6	0.67009
116.8	0.415617	116.8	0.67384
116.99	0.413214	116.99	0.674303
117.19	0.410755	117.19	0.674321
117.4	0.413827	117.4	0.675249
117.6	0.410897	117.6	0.678215
117.79	0.413881	117.79	0.67764
118	0.412813	118	0.68001
118.19	0.416289	118.19	0.67208
118.4	0.4149	118.4	0.679228
118.59	0.412837	118.59	0.681911
118.8	0.417959	118.8	0.6802
119	0.418691	119	0.682533
119.19	0.420385	119.19	0.683646
119.39	0.419448	119.39	0.685147
119.6	0.422886	119.6	0.680528
119.8	0.423765	119.8	0.680657
120	0.423271	120	0.684507
120.19	0.425084	120.19	0.683895
120.4	0.427965	120.4	0.685578
120.6	0.428216	120.6	0.684554
120.8	0.426603	120.8	0.689259
120.99	0.427341	120.99	0.691142
121.19	0.428243	121.19	0.691945
121.4	0.42995	121.4	0.689091
121.6	0.432119	121.6	0.691758
121.79	0.430516	121.79	0.692435
121.99	0.430941	121.99	0.700681
122.19	0.431499	122.19	0.696904
122.39	0.431139	122.39	0.695438
122.6	0.431485	122.6	0.700505
122.79	0.430135	122.79	0.695915
123	0.432987	123	0.701984
123.19	0.439001	123.19	0.703118
123.4	0.437267	123.4	0.701527
123.59	0.437607	123.59	0.701427
123.8	0.437999	123.8	0.702638
124	0.438362	124	0.704208
124.19	0.437236	124.19	0.704712
124.39	0.438514	124.39	0.701822
124.6	0.440962	124.6	0.703132
124.8	0.435716	124.8	0.708418
125	0.441296	125	0.707804
125.19	0.442667	125.19	0.709116
125.4	0.445947	125.4	0.709683
125.6	0.443907	125.6	0.707871
125.8	0.447453	125.8	0.710851
125.99	0.444398	125.99	0.709771
126.19	0.439967	126.19	0.714863
126.4	0.44753	126.4	0.717355
126.6	0.443738	126.6	0.716512
126.79	0.446741	126.79	0.715076
126.99	0.449084	126.99	0.716482
127.19	0.447365	127.19	0.720402
127.39	0.450713	127.39	0.717359
127.59	0.451715	127.59	0.719383
127.79	0.450146	127.79	0.721159
127.99	0.455457	127.99	0.72222
128.19	0.452623	128.19	0.721587
128.39	0.453963	128.39	0.721157
128.59	0.452789	128.59	0.724909
128.79	0.454258	128.79	0.724278
128.99	0.455984	128.99	0.728337
129.19	0.456076	129.19	0.730357
129.39	0.454767	129.39	0.730077
129.59	0.460217	129.59	0.731124
129.79	0.457826	129.79	0.727216
129.99	0.462937	129.99	0.727204
130.19	0.460792	130.19	0.73122
130.39	0.459994	130.39	0.73211
130.59	0.461823	130.59	0.731785
130.79	0.465679	130.79	0.732951
130.99	0.462229	130.99	0.737672
131.19	0.463095	131.19	0.735512
131.39	0.466486	131.39	0.741338
131.59	0.464512	131.59	0.73843
131.79	0.466881	131.79	0.737219
131.99	0.46681	131.99	0.742952
132.19	0.466379	132.19	0.747307
132.39	0.468286	132.39	0.7402
132.59	0.468256	132.59	0.738782
132.79	0.471506	132.79	0.743503
132.99	0.470162	132.99	0.746016
133.19	0.470455	133.19	0.745559
133.39	0.473008	133.39	0.74664
133.59	0.475032	133.59	0.747933
133.79	0.470759	133.79	0.751826
133.99	0.476741	133.99	0.748121
134.19	0.474245	134.19	0.749782
134.39	0.475056	134.39	0.75036
134.6	0.474634	134.6	0.751278
134.79	0.476087	134.79	0.749238
134.99	0.475436	134.99	0.754474
135.19	0.473102	135.19	0.753391
135.39	0.479967	135.39	0.757648
135.6	0.478656	135.6	0.754793
135.79	0.482312	135.79	0.759859
135.99	0.482795	135.99	0.758156
136.19	0.481361	136.19	0.757445
136.39	0.48028	136.39	0.759349
136.6	0.483712	136.6	0.761568
136.79	0.484235	136.79	0.763497
136.99	0.484443	136.99	0.76295
137.19	0.488464	137.19	0.765777
137.39	0.485657	137.39	0.76449
137.6	0.488334	137.6	0.76405
137.79	0.48638	137.79	0.764581
137.99	0.487583	137.99	0.766292
138.19	0.487815	138.19	0.765265
138.39	0.488794	138.39	0.766791
138.6	0.492645	138.6	0.770766
138.79	0.489297	138.79	0.7699
138.99	0.492912	138.99	0.77282
139.19	0.491768	139.19	0.772502
139.39	0.494743	139.39	0.771253
139.6	0.49321	139.6	0.770405
139.79	0.496822	139.79	0.77472
139.99	0.494601	139.99	0.775533
140.19	0.495278	140.19	0.773922
140.41	0.493514	140.41	0.780672
140.59	0.496593	140.59	0.77537
140.79	0.500783	140.79	0.779693
140.99	0.496318	140.99	0.783651
141.19	0.504193	141.19	0.780018
141.39	0.500356	141.39	0.781152
141.59	0.498011	141.59	0.782989
141.79	0.502511	141.79	0.786582
141.99	0.502223	141.99	0.783575
142.19	0.5037	142.19	0.786182
142.39	0.507048	142.39	0.785068
142.6	0.506934	142.6	0.787124
142.79	0.505241	142.79	0.788782
142.99	0.504009	142.99	0.789085
143.19	0.50565	143.19	0.791565
143.39	0.508242	143.39	0.789304
143.6	0.509513	143.6	0.790713
143.79	0.506588	143.79	0.791293
143.99	0.509152	143.99	0.789566
144.19	0.510996	144.19	0.797005
144.39	0.512271	144.39	0.793497
144.6	0.511078	144.6	0.793009
144.79	0.514309	144.79	0.795383
144.99	0.511798	144.99	0.79413
145.19	0.514608	145.19	0.797364
145.39	0.517492	145.39	0.796221
145.59	0.514555	145.59	0.797277
145.79	0.513916	145.79	0.80309
145.99	0.515384	145.99	0.805006
146.19	0.520397	146.19	0.803036
146.39	0.516417	146.39	0.798876
146.59	0.520778	146.59	0.806152
146.79	0.522289	146.79	0.805181
146.99	0.519149	146.99	0.80949
147.19	0.526155	147.19	0.807276
147.39	0.52293	147.39	0.80961
147.6	0.524498	147.6	0.808671
147.79	0.522575	147.79	0.809372
147.99	0.524121	147.99	0.812202
148.19	0.523027	148.19	0.810605
148.39	0.525116	148.39	0.812165
148.6	0.522817	148.6	0.814613
148.79	0.526009	148.79	0.81256
148.99	0.528129	148.99	0.810896
149.19	0.528798	149.19	0.816127
149.39	0.527261	149.39	0.817405
149.6	0.528463	149.6	0.815275
149.79	0.52916	149.79	0.817277
149.99	0.52849	149.99	0.821811
150.19	0.530364	150.19	0.818978
150.39	0.534474	150.39	0.823029
150.59	0.531596	150.59	0.822238
150.79	0.533373	150.79	0.824338
150.99	0.535306	150.99	0.823642
151.19	0.534784	151.19	0.824737
151.39	0.534482	151.39	0.823518
151.59	0.535485	151.59	0.828816
151.79	0.536565	151.79	0.827733
151.99	0.533512	151.99	0.828239
152.19	0.53912	152.19	0.83198
152.39	0.538205	152.39	0.828751
152.59	0.542226	152.59	0.83047
152.79	0.536253	152.79	0.834042
152.99	0.542431	152.99	0.839611
153.19	0.54222	153.19	0.833712
153.39	0.543742	153.39	0.835521
153.6	0.542655	153.6	0.836061
153.79	0.543387	153.79	0.833305
153.99	0.545293	153.99	0.83617
154.19	0.548805	154.19	0.836413
154.39	0.544463	154.39	0.836804
154.59	0.545796	154.59	0.838435
154.79	0.544467	154.79	0.841553
154.99	0.551838	154.99	0.841393
155.19	0.551922	155.19	0.844653
155.39	0.549156	155.39	0.845437
155.59	0.550473	155.59	0.844586
155.79	0.551831	155.79	0.844807
155.99	0.555922	155.99	0.843621
156.19	0.554998	156.19	0.848338
156.39	0.554724	156.39	0.847731
156.6	0.555108	156.6	0.849307
156.79	0.554953	156.79	0.850956
156.99	0.556081	156.99	0.849393
157.19	0.557675	157.19	0.855982
157.39	0.560847	157.39	0.855751
157.6	0.558382	157.6	0.85212
157.79	0.555887	157.79	0.853686
157.99	0.561976	157.99	0.857023
158.19	0.56151	158.19	0.855226
158.39	0.559603	158.39	0.85728
158.6	0.561855	158.6	0.856751
158.79	0.560685	158.79	0.855117
158.99	0.568001	158.99	0.857387
159.19	0.561272	159.19	0.856469
159.39	0.564379	159.39	0.862704
159.6	0.566529	159.6	0.863103
159.79	0.565167	159.79	0.86319
159.99	0.564212	159.99	0.86318
160.19	0.567851	160.19	0.866605
160.39	0.572858	160.39	0.864563
160.6	0.566653	160.6	0.86837
160.79	0.56843	160.79	0.866919
160.99	0.571821	160.99	0.86726
161.19	0.567831	161.19	0.867429
161.39	0.570448	161.39	0.868759
161.6	0.573331	161.6	0.869773
161.79	0.572014	161.79	0.866477
161.99	0.575989	161.99	0.875487
162.19	0.57064	162.19	0.871036
162.39	0.577451	162.39	0.872411
162.6	0.575566	162.6	0.874087
162.79	0.575213	162.79	0.878767
162.99	0.57374	162.99	0.878352
163.19	0.578418	163.19	0.875692
163.39	0.578704	163.39	0.881876
163.59	0.579801	163.59	0.878932
163.79	0.581611	163.79	0.882775
163.99	0.58292	163.99	0.877634
164.19	0.580381	164.19	0.881764
164.39	0.583091	164.39	0.87945
164.6	0.580862	164.6	0.881641
164.79	0.583068	164.79	0.885941
164.99	0.584373	164.99	0.887005
165.19	0.582515	165.19	0.886485
165.39	0.587051	165.39	0.889066
165.6	0.58771	165.6	0.888337
165.79	0.586229	165.79	0.890091
165.99	0.591292	165.99	0.893062
166.19	0.590459	166.19	0.892123
166.39	0.5893	166.39	0.889045
166.6	0.590995	166.6	0.893123
166.79	0.590714	166.79	0.893393
166.99	0.592802	166.99	0.894177
167.19	0.594513	167.19	0.894547
167.39	0.589689	167.39	0.896181
167.6	0.594002	167.6	0.8935
167.79	0.591364	167.79	0.902368
167.99	0.596671	167.99	0.900378
168.19	0.594326	168.19	0.899622
168.39	0.594537	168.39	0.897791
168.6	0.596935	168.6	0.898652
168.79	0.599248	168.79	0.903456
168.99	0.59588	168.99	0.901554
169.19	0.597638	169.19	0.901454
169.39	0.597029	169.39	0.903545
169.6	0.598677	169.6	0.904912
169.79	0.600558	169.79	0.903603
169.99	0.602023	169.99	0.903868
170.19	0.602147	170.19	0.905825
170.39	0.600313	170.39	0.907736
170.6	0.606837	170.6	0.91477
170.79	0.603839	170.79	0.9104
170.99	0.605076	170.99	0.912307
171.19	0.605941	171.19	0.909726
171.39	0.608871	171.39	0.911772
171.6	0.608224	171.6	0.916057
171.79	0.60595	171.79	0.915357
171.99	0.608927	171.99	0.916252
172.19	0.611255	172.19	0.918604
172.39	0.612405	172.39	0.912805
172.59	0.607876	172.59	0.92047
172.79	0.612853	172.79	0.915833
172.99	0.612925	172.99	0.917756
173.19	0.613595	173.19	0.919211
173.39	0.613408	173.39	0.919167
173.59	0.611867	173.59	0.924157
173.79	0.612824	173.79	0.924146
173.99	0.617709	173.99	0.923425
174.19	0.614723	174.19	0.923789
174.39	0.618173	174.39	0.925569
174.59	0.615706	174.59	0.921787
174.79	0.616976	174.79	0.928602
174.99	0.617797	174.99	0.930264
175.19	0.622046	175.19	0.931042
175.39	0.618586	175.39	0.930553
175.6	0.622128	175.6	0.93021
175.79	0.621758	175.79	0.93178
175.99	0.619732	175.99	0.930002
176.19	0.622771	176.19	0.933148
176.39	0.622813	176.39	0.935366
176.59	0.623976	176.59	0.9356
176.79	0.624874	176.79	0.93838
176.99	0.62597	176.99	0.935735
177.19	0.622607	177.19	0.940616
177.39	0.627686	177.39	0.940076
177.59	0.628527	177.59	0.939897
177.79	0.628177	177.79	0.942711
177.99	0.628726	177.99	0.941859
178.19	0.628681	178.19	0.939354
178.39	0.631753	178.39	0.941697
178.59	0.632163	178.59	0.941184
178.79	0.628601	178.79	0.945605
178.99	0.635625	178.99	0.944092
179.19	0.631585	179.19	0.947616
179.39	0.633404	179.39	0.94084
179.6	0.637194	179.6	0.949139
179.79	0.632151	179.79	0.948791
179.99	0.636592	179.99	0.949337
180.19	0.636254	180.19	0.951013
180.39	0.635021	180.39	0.950466
180.59	0.637953	180.59	0.954998
180.79	0.637944	180.79	0.951565
180.99	0.63881	180.99	0.954235
181.19	0.639431	181.19	0.956636
181.39	0.641206	181.39	0.957248
181.6	0.641537	181.6	0.956089
181.79	0.641512	181.79	0.954505
181.99	0.641353	181.99	0.956341
182.19	0.642865	182.19	0.96066
182.39	0.642298	182.39	0.959689
182.6	0.64375	182.6	0.961089
182.79	0.642837	182.79	0.963518
182.99	0.64574	182.99	0.96367
183.19	0.646249	183.19	0.963357
183.39	0.646245	183.39	0.964766
183.6	0.646661	183.6	0.968555
183.79	0.64409	183.79	0.962382
183.99	0.651869	183.99	0.968277
184.19	0.648101	184.19	0.967449
184.39	0.64931	184.39	0.967551
184.6	0.652361	184.6	0.971714
184.79	0.652372	184.79	0.968389
184.99	0.655657	184.99	0.971781
185.19	0.652504	185.19	0.972915
185.39	0.654164	185.39	0.972254
185.59	0.652871	185.59	0.976597
185.79	0.655502	185.79	0.970653
185.99	0.656342	185.99	0.976547
186.19	0.65554	186.19	0.972236
186.39	0.655841	186.39	0.975945
186.6	0.656556	186.6	0.979118
186.79	0.658382	186.79	0.983733
186.99	0.660783	186.99	0.979725
187.19	0.660472	187.19	0.981261
187.39	0.66441	187.39	0.976408
187.6	0.662938	187.6	0.9812
187.79	0.661424	187.79	0.981893
187.99	0.663962	187.99	0.984055
188.19	0.664273	188.19	0.983202
188.39	0.663543	188.39	0.984073
188.6	0.664167	188.6	0.98249
188.79	0.665393	188.79	0.987236
188.99	0.665903	188.99	0.988967
189.19	0.666299	189.19	0.986731
189.39	0.666151	189.39	0.992427
189.59	0.668959	189.59	0.993335
189.79	0.668191	189.79	0.988305
189.99	0.670727	189.99	0.990602
190.19	0.666893	190.19	0.991764
190.39	0.669092	190.39	0.998712
190.59	0.668276	190.59	0.995973
190.79	0.672355	190.79	0.999511
190.99	0.67382	190.99	0.999597
191.19	0.673969	191.19	0.999755
191.39	0.672958	191.39	0.999685
191.59	0.673063	191.59	0.998896
191.79	0.676129	191.79	1.00299
191.99	0.677654	191.99	1.0002
192.19	0.676337	192.19	1.00064
192.39	0.677141	192.39	1.00283
192.6	0.679486	192.6	1.00526
192.79	0.67777	192.79	1.00621
192.99	0.682508	192.99	1.00725
193.19	0.680012	193.19	1.0063
193.39	0.681264	193.39	1.00583
193.59	0.682038	193.59	1.00796
193.79	0.682171	193.79	1.00777
193.99	0.686021	193.99	1.01205
194.19	0.684698	194.19	1.01293
194.39	0.686098	194.39	1.01386
194.59	0.68332	194.59	1.01236
194.79	0.689659	194.79	1.01359
194.99	0.689468	194.99	1.01535
195.19	0.690225	195.19	1.01804
195.39	0.688362	195.39	1.02025
195.59	0.691419	195.59	1.01527
195.79	0.687823	195.79	1.01832
195.99	0.68974	195.99	1.01994
196.19	0.691912	196.19	1.02098
196.39	0.692295	196.39	1.02185
196.6	0.68843	196.6	1.01947
196.79	0.689653	196.79	1.02292
196.99	0.690782	196.99	1.02034
197.19	0.697174	197.19	1.02467
197.39	0.693858	197.39	1.02524
197.59	0.693164	197.59	1.02332
197.79	0.695269	197.79	1.02837
197.99	0.698569	197.99	1.02714
198.19	0.696685	198.19	1.03009
198.39	0.69749	198.39	1.02783
198.59	0.695504	198.59	1.02777
198.79	0.697519	198.79	1.02904
198.99	0.704407	198.99	1.02987
199.19	0.698899	199.19	1.03096
199.39	0.701504	199.39	1.03463
199.59	0.702715	199.59	1.03122
199.79	0.702357	199.79	1.03504
199.99	0.706266	199.99	1.03125
200.19	0.703085	200.19	1.03659
200.39	0.706719	200.39	1.03791
200.59	0.705052	200.59	1.03819
200.79	0.705952	200.79	1.03737
200.99	0.703586	200.99	1.03814
201.19	0.70514	201.19	1.04032
201.39	0.707588	201.39	1.04222
201.6	0.709275	201.6	1.04085
201.79	0.708859	201.79	1.04368
201.99	0.712754	201.99	1.04442
202.19	0.710921	202.19	1.04612
202.39	0.711411	202.39	1.04307
202.6	0.712474	202.6	1.04876
202.79	0.716614	202.79	1.0422
202.99	0.71568	202.99	1.04994
203.19	0.713046	203.19	1.04936
203.39	0.714843	203.39	1.05413
203.6	0.716002	203.6	1.04956
203.79	0.717883	203.79	1.0506
203.99	0.71724	203.99	1.04831
204.19	0.719099	204.19	1.0492
204.39	0.720071	204.39	1.05329
204.6	0.717928	204.6	1.05766
204.79	0.720095	204.79	1.05718
204.99	0.718714	204.99	1.05514
205.19	0.721566	205.19	1.05813
205.39	0.719899	205.39	1.05696
205.6	0.72052	205.6	1.06021
205.79	0.721853	205.79	1.05785
205.99	0.722965	205.99	1.05979
206.19	0.723961	206.19	1.06058
206.39	0.723135	206.39	1.05918
206.6	0.728307	206.6	1.06131
206.79	0.729428	206.79	1.06196
206.99	0.729192	206.99	1.06295
207.19	0.727091	207.19	1.06579
207.39	0.726076	207.39	1.06398
207.6	0.731303	207.6	1.06461
207.79	0.730664	207.79	1.06867
207.99	0.733487	207.99	1.06789
208.19	0.731833	208.19	1.07296
208.39	0.730653	208.39	1.07025
208.6	0.736364	208.6	1.07318
208.79	0.731918	208.79	1.07386
208.99	0.734163	208.99	1.07091
209.19	0.733833	209.19	1.07694
209.39	0.735793	209.39	1.07462
209.6	0.736294	209.6	1.07537
209.79	0.737394	209.79	1.08037
209.99	0.73415	209.99	1.07843
210.19	0.739969	210.19	1.07498
210.39	0.737519	210.39	1.07837
210.6	0.738309	210.6	1.08159
210.79	0.740355	210.79	1.08118
210.99	0.744099	210.99	1.08641
211.19	0.74311	211.19	1.08538
211.39	0.743594	211.39	1.08316
211.6	0.740844	211.6	1.08782
211.79	0.742888	211.79	1.08497
211.99	0.743956	211.99	1.08718
212.19	0.743429	212.19	1.08834
212.39	0.743623	212.39	1.09108
212.59	0.748207	212.59	1.08962
212.79	0.7471	212.79	1.08909
212.99	0.744608	212.99	1.09019
213.19	0.748885	213.19	1.09279
213.39	0.746742	213.39	1.08887
213.59	0.749091	213.59	1.09355
213.79	0.7511	213.79	1.0961
213.99	0.748062	213.99	1.09482
214.19	0.752085	214.19	1.09609
214.39	0.753407	214.39	1.09555
214.6	0.75575	214.6	1.09872
214.79	0.752201	214.79	1.09906
214.99	0.755071	214.99	1.09645
215.19	0.75974	215.19	1.10393
215.39	0.75677	215.39	1.10076
215.59	0.757299	215.59	1.10106
215.79	0.757123	215.79	1.10407
215.99	0.760544	215.99	1.1025
216.19	0.758736	216.19	1.10452
216.39	0.759856	216.39	1.10473
216.59	0.759675	216.59	1.10568
216.79	0.759794	216.79	1.10683
216.99	0.760434	216.99	1.10496
217.19	0.761274	217.19	1.10983
217.39	0.760087	217.39	1.11028
217.59	0.760709	217.59	1.10404
217.79	0.762725	217.79	1.10945
217.99	0.767589	217.99	1.10829
218.19	0.76562	218.19	1.11204
218.39	0.766295	218.39	1.1149
218.6	0.767768	218.6	1.11441
218.79	0.771482	218.79	1.11289
218.99	0.769841	218.99	1.11572
219.19	0.768151	219.19	1.11514
219.39	0.767159	219.39	1.11594
219.59	0.770273	219.59	1.11755
219.79	0.772051	219.79	1.1164
219.99	0.768864	219.99	1.1174
220.19	0.771786	220.19	1.12513
220.39	0.770685	220.39	1.11548
220.59	0.772461	220.59	1.12324
220.79	0.777731	220.79	1.12165
220.99	0.776571	220.99	1.12159
221.19	0.771632	221.19	1.12671
221.39	0.77597	221.39	1.12764
221.59	0.776386	221.59	1.1275
221.79	0.780212	221.79	1.12638
221.99	0.773803	221.99	1.12725
222.19	0.773796	222.19	1.13021
222.39	0.779905	222.39	1.12464
222.59	0.778513	222.59	1.12994
222.79	0.779575	222.79	1.13347
222.99	0.779996	222.99	1.13426
223.19	0.779983	223.19	1.13001
223.39	0.778948	223.39	1.13484
223.59	0.783486	223.59	1.13598
223.79	0.779869	223.79	1.13514
223.99	0.784512	223.99	1.1403
224.19	0.785409	224.19	1.13764
224.39	0.786936	224.39	1.13835
224.6	0.786505	224.6	1.14135
224.79	0.78667	224.79	1.14008
224.99	0.788096	224.99	1.13678
225.19	0.790666	225.19	1.1412
225.39	0.787026	225.39	1.14536
225.6	0.786649	225.6	1.14236
225.79	0.790621	225.79	1.14017
225.99	0.790837	225.99	1.14628
226.19	0.789285	226.19	1.1483
226.39	0.792336	226.39	1.14729
226.6	0.79452	226.6	1.14556
226.79	0.794954	226.79	1.15083
226.99	0.795521	226.99	1.15187
227.19	0.795051	227.19	1.14939
227.39	0.79325	227.39	1.15212
227.6	0.795228	227.6	1.15261
227.79	0.79634	227.79	1.15139
227.99	0.796767	227.99	1.15474
228.19	0.801609	228.19	1.15094
228.39	0.800185	228.39	1.15702
228.59	0.80057	228.59	1.15264
228.79	0.802228	228.79	1.15645
228.99	0.800551	228.99	1.15821
229.19	0.801057	229.19	1.1569
229.39	0.803676	229.39	1.15903
229.59	0.803703	229.59	1.16121
229.79	0.804772	229.79	1.15837
229.99	0.80715	229.99	1.15885
230.19	0.804389	230.19	1.16355
230.39	0.806033	230.39	1.1618
230.6	0.80655	230.6	1.16253
230.79	0.805382	230.79	1.16645
230.99	0.805836	230.99	1.1644
231.19	0.809522	231.19	1.16462
231.39	0.810138	231.39	1.16894
231.6	0.808026	231.6	1.16699
231.79	0.808879	231.79	1.16971
231.99	0.808492	231.99	1.17029
232.19	0.811218	232.19	1.16914
232.39	0.812	232.39	1.17053
232.6	0.812357	232.6	1.175
232.79	0.813635	232.79	1.17559
232.99	0.811812	232.99	1.16912
233.19	0.815569	233.19	1.17521
233.39	0.815952	233.39	1.17169
233.59	0.818069	233.59	1.17384
233.79	0.82052	233.79	1.177
233.99	0.819049	233.99	1.17916
234.19	0.81934	234.19	1.1816
234.39	0.816174	234.39	1.17817
234.59	0.81742	234.59	1.17847
234.79	0.82104	234.79	1.18025
234.99	0.824124	234.99	1.18423
235.19	0.821401	235.19	1.18289
235.39	0.821194	235.39	1.18661
235.6	0.823552	235.6	1.18758
235.79	0.824476	235.79	1.1827
235.99	0.823379	235.99	1.18307
236.19	0.8235	236.19	1.19027
236.39	0.825585	236.39	1.19133
236.6	0.828022	236.6	1.18722
236.79	0.824028	236.79	1.19138
236.99	0.828628	236.99	1.1932
237.19	0.82835	237.19	1.1905
237.39	0.827848	237.39	1.19344
237.59	0.827453	237.59	1.19061
237.79	0.828895	237.79	1.19465
237.99	0.829243	237.99	1.19467
238.19	0.832803	238.19	1.19582
238.39	0.831404	238.39	1.19731
238.59	0.83715	238.59	1.19433
238.79	0.832229	238.79	1.20046
238.99	0.834294	238.99	1.19855
239.19	0.837145	239.19	1.19985
239.39	0.835131	239.39	1.20026
239.6	0.836497	239.6	1.20063
239.79	0.834987	239.79	1.20151
239.99	0.836297	239.99	1.20392
240.19	0.840667	240.19	1.20767
240.39	0.838906	240.39	1.20676
240.59	0.83715	240.59	1.20505
240.79	0.840071	240.79	1.20976
240.99	0.836657	240.99	1.20792
241.19	0.839305	241.19	1.20688
241.39	0.840041	241.39	1.21094
241.59	0.845236	241.59	1.21061
241.79	0.839028	241.79	1.20955
241.99	0.84355	241.99	1.2101
242.19	0.841208	242.19	1.21745
242.39	0.843311	242.39	1.21502
242.59	0.846587	242.59	1.21566
242.79	0.847936	242.79	1.21365
242.99	0.847727	242.99	1.21925
243.19	0.84999	243.19	1.21512
243.39	0.8512	243.39	1.21941
243.59	0.846094	243.59	1.21703
243.79	0.849449	243.79	1.22099
243.99	0.848426	243.99	1.21849
244.19	0.84989	244.19	1.21716
244.39	0.851319	244.39	1.22316
244.59	0.853379	244.59	1.22169
244.79	0.852028	244.79	1.22155
244.99	0.853529	244.99	1.22464
245.19	0.854383	245.19	1.22762
245.39	0.850559	245.39	1.22514
245.59	0.856843	245.59	1.22624
245.79	0.857867	245.79	1.2299
245.99	0.856732	245.99	1.2303
246.19	0.855923	246.19	1.22964
246.39	0.858321	246.39	1.23496
246.6	0.857891	246.6	1.23214
246.79	0.859445	246.79	1.23335
246.99	0.85628	246.99	1.23256
247.19	0.860288	247.19	1.23579
247.39	0.860303	247.39	1.23545
247.6	0.865322	247.6	1.23462
247.79	0.867741	247.79	1.23597
247.99	0.862535	247.99	1.2366
248.19	0.863239	248.19	1.23427
248.39	0.861622	248.39	1.23916
248.6	0.866412	248.6	1.23981
248.79	0.865578	248.79	1.24099
248.99	0.864677	248.99	1.24324
249.19	0.869351	249.19	1.24016
249.39	0.864325	249.39	1.24285
249.6	0.867526	249.6	1.24118
249.79	0.869307	249.79	1.24075
249.99	0.866902	249.99	1.23906
250.19	0.869692	250.19	1.24278
250.39	0.871918	250.39	1.24305
250.6	0.86988	250.6	1.24274
250.79	0.871675	250.79	1.24657
250.99	0.873201	250.99	1.24915
251.19	0.877251	251.19	1.25132
251.39	0.876234	251.39	1.24988
251.59	0.873475	251.59	1.25391
251.79	0.876575	251.79	1.25215
251.99	0.87448	251.99	1.25177
252.19	0.877356	252.19	1.25748
252.39	0.879583	252.39	1.25725
252.6	0.878461	252.6	1.25295
252.79	0.876618	252.79	1.25551
252.99	0.880804	252.99	1.2564
253.19	0.876858	253.19	1.25699
253.39	0.881586	253.39	1.26051
253.6	0.878928	253.6	1.26205
253.79	0.879914	253.79	1.25976
253.99	0.88038	253.99	1.26122
254.19	0.8824	254.19	1.26141
254.39	0.884053	254.39	1.2636
254.6	0.885066	254.6	1.26115
254.79	0.889389	254.79	1.26357
254.99	0.884149	254.99	1.26348
255.19	0.889172	255.19	1.26583
255.39	0.88553	255.39	1.2671
255.59	0.886359	255.59	1.27023
255.79	0.886096	255.79	1.26757
255.99	0.891036	255.99	1.27096
256.2	0.889691	256.2	1.27126
256.39	0.890619	256.39	1.27217
256.6	0.889459	256.6	1.27337
256.79	0.890572	256.79	1.26864
256.99	0.892141	256.99	1.2725
257.2	0.89198	257.2	1.27535
257.39	0.892576	257.39	1.27635
257.6	0.892903	257.6	1.2758
257.79	0.895889	257.79	1.28038
257.99	0.895172	257.99	1.27869
258.19	0.899916	258.19	1.28063
258.39	0.897211	258.39	1.28168
258.6	0.897566	258.6	1.27911
258.79	0.896131	258.79	1.28003
258.99	0.897698	258.99	1.28731
259.19	0.898107	259.19	1.28371
259.39	0.904096	259.39	1.28044
259.6	0.899729	259.6	1.28233
259.79	0.899643	259.79	1.28348
259.99	0.900453	259.99	1.28394
260.19	0.903678	260.19	1.28804
260.39	0.902065	260.39	1.29289
260.59	0.904784	260.59	1.28853
260.79	0.906668	260.79	1.28955
260.99	0.906615	260.99	1.28844
261.19	0.906385	261.19	1.29308
261.39	0.906744	261.39	1.29174
261.59	0.911731	261.59	1.29227
261.79	0.910749	261.79	1.29182
261.99	0.910231	261.99	1.29849
262.2	0.906635	262.2	1.29387
262.39	0.907282	262.39	1.29617
262.6	0.908881	262.6	1.29655
262.79	0.910794	262.79	1.29478
262.99	0.909429	262.99	1.29857
263.19	0.912587	263.19	1.30459
263.39	0.913491	263.39	1.29932
263.6	0.912312	263.6	1.29913
263.79	0.915781	263.79	1.30248
263.99	0.915906	263.99	1.30147
264.19	0.917667	264.19	1.30501
264.39	0.918157	264.39	1.30495
264.59	0.915916	264.59	1.30612
264.79	0.918179	264.79	1.30843
264.99	0.919812	264.99	1.30807
265.19	0.91856	265.19	1.30635
265.39	0.919938	265.39	1.30492
265.59	0.922147	265.59	1.30867
265.79	0.923974	265.79	1.3071
265.99	0.923344	265.99	1.30807
266.19	0.922267	266.19	1.31355
266.39	0.923389	266.39	1.31166
266.59	0.923467	266.59	1.31504
266.79	0.928633	266.79	1.3116
266.99	0.925551	266.99	1.31881
267.19	0.924993	267.19	1.31611
267.39	0.929718	267.39	1.31778
267.6	0.926775	267.6	1.31884
267.79	0.923947	267.79	1.31987
267.99	0.928074	267.99	1.32134
268.19	0.929438	268.19	1.31941
268.39	0.925319	268.39	1.32061
268.6	0.927251	268.6	1.32206
268.79	0.928134	268.79	1.32445
268.99	0.93531	268.99	1.32232
269.2	0.931825	269.2	1.32653
269.39	0.933317	269.39	1.32185
269.6	0.929368	269.6	1.32553
269.79	0.935282	269.79	1.32894
269.99	0.934292	269.99	1.33051
270.2	0.937408	270.2	1.33055
270.39	0.938704	270.39	1.32937
270.6	0.939124	270.6	1.33164
270.79	0.941529	270.79	1.32754
270.99	0.938557	270.99	1.33174
271.2	0.939	271.2	1.33351
271.39	0.939589	271.39	1.33451
271.6	0.938057	271.6	1.33574
271.79	0.940321	271.79	1.33539
271.99	0.937841	271.99	1.33549
272.2	0.939223	272.2	1.33865
272.39	0.940776	272.39	1.33991
272.59	0.941944	272.59	1.34099
272.79	0.943187	272.79	1.33348
272.99	0.941993	272.99	1.3371
273.2	0.945565	273.2	1.34266
273.39	0.943817	273.39	1.34135
273.59	0.946519	273.59	1.34101
273.79	0.948844	273.79	1.34707
273.99	0.948945	273.99	1.34633
274.2	0.95156	274.2	1.34538
274.39	0.944849	274.39	1.34576
274.6	0.948572	274.6	1.34572
274.79	0.950759	274.79	1.34747
274.99	0.953006	274.99	1.35201
275.2	0.952441	275.2	1.35116
275.39	0.95266	275.39	1.3488
275.6	0.955011	275.6	1.35064
275.79	0.954763	275.79	1.3531
275.99	0.9521	275.99	1.35313
276.19	0.952424	276.19	1.35593
276.39	0.952982	276.39	1.35285
276.6	0.956622	276.6	1.35853
276.79	0.957156	276.79	1.35221
276.99	0.955758	276.99	1.35662
277.19	0.956906	277.19	1.35664
277.39	0.960212	277.39	1.35944
277.59	0.958418	277.59	1.35902
277.79	0.960615	277.79	1.36392
277.99	0.959496	277.99	1.35963
278.2	0.956058	278.2	1.36276
278.39	0.963695	278.39	1.35967
278.59	0.96486	278.59	1.36201
278.79	0.965019	278.79	1.3655
278.99	0.962072	278.99	1.36311
279.2	0.967466	279.2	1.36493	wash in reaction buffer
279.39	0.964001	279.39	1.3642
279.6	0.967045	279.6	1.36502
279.79	0.966	279.79	1.36999
279.99	0.965632	279.99	1.37042
280.19	0.96516	280.19	1.37165
280.39	0.965007	280.39	1.36931
280.6	0.968287	280.6	1.3735
280.79	0.971083	280.79	1.37713
280.99	0.969843	280.99	1.37337
281.19	0.972429	281.19	1.37154
281.39	0.972517	281.39	1.3759
281.6	0.972887	281.6	1.37876
281.79	0.970107	281.79	1.37447
281.99	0.972564	281.99	1.37452
282.2	0.971216	282.2	1.37755
282.39	0.974953	282.39	1.37567
282.59	0.97071	282.59	1.38056
282.79	0.973562	282.79	1.38039
282.99	0.978921	282.99	1.38095
283.19	0.979226	283.19	1.38295
283.39	0.976174	283.39	1.3823
283.59	0.976131	283.59	1.38195
283.79	0.976639	283.79	1.3831
283.99	0.980212	283.99	1.38356
284.19	0.981076	284.19	1.38512
284.39	0.980487	284.39	1.38678
284.6	0.980555	284.6	1.38476
284.79	0.980865	284.79	1.38965
284.99	0.98197	284.99	1.38843
285.19	0.983541	285.19	1.3909
285.39	0.983646	285.39	1.39007
285.6	0.984696	285.6	1.39025
285.79	0.987771	285.79	1.39357
285.99	0.985065	285.99	1.39646
286.19	0.985761	286.19	1.39227
286.39	0.98643	286.39	1.3926
286.6	0.9895	286.6	1.39843
286.79	0.986676	286.79	1.39727
286.99	0.991405	286.99	1.39551
287.19	0.990001	287.19	1.40211
287.39	0.989947	287.39	1.39945
287.59	0.991392	287.59	1.40015
287.79	0.989042	287.79	1.39756
287.99	0.991407	287.99	1.40429
288.2	0.994645	288.2	1.4053
288.39	0.992738	288.39	1.40149
288.59	0.990294	288.59	1.40207
288.79	0.991707	288.79	1.40273
288.99	0.997975	288.99	1.40403
289.19	0.995337	289.19	1.40899
289.39	0.995147	289.39	1.40596
289.59	0.997602	289.59	1.40742
289.79	1.00049	289.79	1.40719
289.99	0.995679	289.99	1.40825
290.19	0.999608	290.19	1.41256
290.39	1.00315	290.39	1.41059
290.59	0.999426	290.59	1.41267
290.79	1.00147	290.79	1.41208
290.99	1.00356	290.99	1.41476
291.2	1.00485	291.2	1.41565
291.39	1.00218	291.39	1.41458
291.6	1.00711	291.6	1.41385
291.79	1.00067	291.79	1.41738
291.99	1.00591	291.99	1.41779
292.2	1.0064	292.2	1.41643
292.4	0.995068	292.4	1.42582
292.6	1.00322	292.6	1.43689
292.79	1.01085	292.79	1.4464
293	1.01884	293	1.44494
293.2	1.02597	293.2	1.4568
293.4	1.03209	293.4	1.46069
293.59	1.0372	293.59	1.46594
293.8	1.04131	293.8	1.46944
294	1.04135	294	1.47192
294.19	1.04873	294.19	1.47458
294.39	1.04831	294.39	1.47746
294.6	1.05206	294.6	1.47721
294.8	1.05085	294.8	1.4775
294.99	1.05558	294.99	1.48422
295.19	1.05381	295.19	1.47863
295.39	1.05818	295.39	1.47829
295.6	1.0577	295.6	1.47858
295.79	1.05884	295.79	1.48011
295.99	1.0571	295.99	1.48392
296.19	1.06247	296.19	1.48313
296.39	1.06025	296.39	1.48446
296.59	1.06076	296.59	1.48037
296.79	1.0595	296.79	1.48137
296.99	1.0637	296.99	1.48533
297.19	1.06685	297.19	1.48304
297.39	1.06397	297.39	1.48158
297.59	1.06327	297.59	1.48137
297.8	1.0633	297.8	1.48211
297.99	1.06478	297.99	1.48331
298.19	1.06225	298.19	1.48346
298.39	1.06096	298.39	1.47954
298.59	1.06369	298.59	1.48171
298.79	1.06697	298.79	1.48295
298.99	1.06464	298.99	1.48527
299.19	1.06621	299.19	1.48061
299.39	1.06621	299.39	1.48411
299.6	1.06451	299.6	1.48182
299.8	1.06495	299.8	1.48206
299.99	1.06458	299.99	1.48465
300.19	1.06375	300.19	1.48
300.39	1.06626	300.39	1.48452
300.59	1.06479	300.59	1.48018
300.79	1.07055	300.79	1.47788
300.99	1.06448	300.99	1.4807
301.19	1.07013	301.19	1.48148
301.39	1.06628	301.39	1.47772
301.59	1.06709	301.59	1.48488
301.8	1.06299	301.8	1.48141
302	1.06802	302	1.48058
302.2	1.06641	302.2	1.47906
302.4	1.06431	302.4	1.48254
302.6	1.06809	302.6	1.48171
302.8	1.06835	302.8	1.47722
303	1.06716	303	1.48206
303.2	1.06843	303.2	1.48088
303.4	1.0637	303.4	1.47996
303.6	1.0654	303.6	1.48161
303.8	1.06545	303.8	1.48121
304	1.06859	304	1.47813
304.2	1.06838	304.2	1.48152
304.4	1.06382	304.4	1.4787
304.6	1.06708	304.6	1.48367
304.79	1.06533	304.79	1.47773
305	1.06436	305	1.4802
305.2	1.06408	305.2	1.47949
305.4	1.06649	305.4	1.48167
305.6	1.06543	305.6	1.4775
305.8	1.06402	305.8	1.48016
306	1.06388	306	1.47901
306.2	1.06613	306.2	1.47934
306.39	1.06292	306.39	1.48149
306.6	1.06535	306.6	1.47985
306.8	1.06623	306.8	1.48007
307	1.06643	307	1.4824
307.19	1.06386	307.19	1.47816
307.4	1.06579	307.4	1.47764
307.6	1.07022	307.6	1.47776
307.8	1.06633	307.8	1.47776
307.99	1.06425	307.99	1.48163
308.19	1.06627	308.19	1.47754
308.4	1.07101	308.4	1.47861
308.6	1.06641	308.6	1.48021
308.8	1.06479	308.8	1.48091
309	1.06597	309	1.47495
309.2	1.06546	309.2	1.47732
309.4	1.06651	309.4	1.48032
309.59	1.06326	309.59	1.48067
309.79	1.06514	309.79	1.48164
310	1.06648	310	1.47775
310.2	1.06685	310.2	1.47666
310.4	1.06647	310.4	1.47926
310.59	1.06706	310.59	1.47494
310.8	1.06408	310.8	1.47891
311	1.0609	311	1.47739
311.2	1.06481	311.2	1.47835
311.39	1.06704	311.39	1.47599
311.6	1.06802	311.6	1.47483
311.8	1.06748	311.8	1.4806
312	1.06717	312	1.47369
312.19	1.0669	312.19	1.47268
312.4	1.06422	312.4	1.47872
312.6	1.06185	312.6	1.47501
312.8	1.06677	312.8	1.47226
312.99	1.05842	312.99	1.47977
313.19	1.06325	313.19	1.47779
313.4	1.06302	313.4	1.47283
313.6	1.06253	313.6	1.47879
313.79	1.06213	313.79	1.47501
314	1.06251	314	1.47478
314.2	1.06213	314.2	1.47812
314.4	1.06589	314.4	1.47747
314.59	1.06812	314.59	1.47491
314.79	1.06504	314.79	1.47623
315	1.06543	315	1.47206
315.19	1.0658	315.19	1.47612
315.4	1.06294	315.4	1.47214
315.59	1.06524	315.59	1.47691
315.8	1.06438	315.8	1.47466
316	1.06401	316	1.47749
316.2	1.06591	316.2	1.47533
316.39	1.06259	316.39	1.47654
316.6	1.06257	316.6	1.4751
316.79	1.06622	316.79	1.4739
316.99	1.06645	316.99	1.47611
317.19	1.06283	317.19	1.47766
317.39	1.06175	317.39	1.47564
317.6	1.06276	317.6	1.47315
317.8	1.06629	317.8	1.47733
317.99	1.06239	317.99	1.47654
318.19	1.06058	318.19	1.47593
318.4	1.06234	318.4	1.47669
318.59	1.06589	318.59	1.47601
318.79	1.061	318.79	1.47662
318.99	1.06196	318.99	1.4764
319.19	1.05847	319.19	1.47143
319.4	1.06159	319.4	1.47324
319.59	1.06847	319.59	1.47673
319.79	1.06336	319.79	1.47063
319.99	1.06407	319.99	1.47007
320.2	1.06385	320.2	1.47469
320.39	1.06292	320.39	1.47406
320.59	1.06737	320.59	1.47345
320.79	1.05984	320.79	1.47692
321	1.06336	321	1.47103
321.2	1.06355	321.2	1.47145
321.39	1.06366	321.39	1.47255
321.59	1.06252	321.59	1.47331
321.8	1.05831	321.8	1.47102
321.99	1.06161	321.99	1.47567
322.19	1.06306	322.19	1.4731
322.39	1.06196	322.39	1.47324
322.59	1.06352	322.59	1.47799
322.79	1.05846	322.79	1.47534
322.99	1.06398	322.99	1.47183
323.19	1.06344	323.19	1.47383
323.4	1.06024	323.4	1.47563
323.59	1.06261	323.59	1.47231
323.79	1.06212	323.79	1.4731
323.99	1.06557	323.99	1.47513
324.19	1.05999	324.19	1.4722
324.4	1.05997	324.4	1.47511
324.6	1.06262	324.6	1.47185
324.8	1.06129	324.8	1.47483
325	1.0599	325	1.47229
325.19	1.05875	325.19	1.47368
325.4	1.06022	325.4	1.47399
325.6	1.06185	325.6	1.47101
325.8	1.06143	325.8	1.47286
326	1.06437	326	1.46889
326.2	1.05945	326.2	1.47416
326.4	1.06035	326.4	1.47514
326.6	1.06219	326.6	1.47331
326.79	1.06151	326.79	1.4703
327	1.05993	327	1.47151
327.2	1.06149	327.2	1.4708
327.4	1.06635	327.4	1.47043
327.6	1.06539	327.6	1.47144
327.8	1.06298	327.8	1.47291
328	1.06442	328	1.47204
328.2	1.06153	328.2	1.4706
328.39	1.06379	328.39	1.46989
328.59	1.05999	328.59	1.47234
328.8	1.067	328.8	1.46979
329	1.06032	329	1.47387
329.2	1.0608	329.2	1.46896
329.39	1.06545	329.39	1.47127
329.6	1.06211	329.6	1.47104
329.8	1.05976	329.8	1.47328
330	1.05895	330	1.47556
330.19	1.05798	330.19	1.47369
330.39	1.06531	330.39	1.47071
330.6	1.06201	330.6	1.47111
330.8	1.0625	330.8	1.4739
330.99	1.06359	330.99	1.47099
331.2	1.05808	331.2	1.4735
331.4	1.05945	331.4	1.4704
331.6	1.06255	331.6	1.46873
331.79	1.06045	331.79	1.47023
331.99	1.06005	331.99	1.46979
332.2	1.06056	332.2	1.46891
332.4	1.06155	332.4	1.47005
332.59	1.06279	332.59	1.46986
332.8	1.06039	332.8	1.47193
333	1.05896	333	1.47185
333.2	1.05818	333.2	1.47045
333.39	1.06255	333.39	1.47399
333.6	1.05895	333.6	1.47203
333.8	1.05997	333.8	1.46957
334	1.05693	334	1.46873
334.19	1.05897	334.19	1.46877
334.4	1.06098	334.4	1.46956
334.6	1.06292	334.6	1.46845
334.8	1.05992	334.8	1.47049
335	1.06075	335	1.47077
335.19	1.05967	335.19	1.47136
335.4	1.06203	335.4	1.4724
335.6	1.06275	335.6	1.46636
335.79	1.06297	335.79	1.46958
335.99	1.06276	335.99	1.46925
336.2	1.05971	336.2	1.46872
336.4	1.06291	336.4	1.4669
336.6	1.05868	336.6	1.46633
336.79	1.06075	336.79	1.46595
336.99	1.05817	336.99	1.46459
337.2	1.05939	337.2	1.46888
337.39	1.05908	337.39	1.46669
337.59	1.05853	337.59	1.47108
337.79	1.0603	337.79	1.46923
338	1.05951	338	1.46744
338.2	1.05599	338.2	1.46922
338.39	1.0638	338.39	1.46631
338.59	1.05752	338.59	1.47012
338.8	1.06143	338.8	1.46714
339	1.05807	339	1.46835
339.19	1.06003	339.19	1.46604
339.39	1.05993	339.39	1.46788
339.59	1.05825	339.59	1.46651
339.8	1.05722	339.8	1.46651
340	1.05842	340	1.46667
340.19	1.05749	340.19	1.46645
340.39	1.06131	340.39	1.46908
340.59	1.06176	340.59	1.46897
340.79	1.06055	340.79	1.46723
340.99	1.0562	340.99	1.46425
341.2	1.05956	341.2	1.46472
341.39	1.05615	341.39	1.46729
341.59	1.05925	341.59	1.46977
341.79	1.05926	341.79	1.46834
341.99	1.05727	341.99	1.46949
342.2	1.05977	342.2	1.46948
342.39	1.05794	342.39	1.46653
342.59	1.05735	342.59	1.46906
342.79	1.05837	342.79	1.46563
342.99	1.05965	342.99	1.46662
343.2	1.06131	343.2	1.4664
343.39	1.06309	343.39	1.46407
343.59	1.05822	343.59	1.46605
343.79	1.057	343.79	1.46699
343.99	1.06044	343.99	1.46882
344.19	1.05957	344.19	1.46592
344.39	1.05824	344.39	1.46811
344.59	1.05525	344.59	1.46523
344.79	1.05964	344.79	1.46468
344.99	1.05558	344.99	1.46847
345.19	1.05912	345.19	1.46664
345.39	1.05846	345.39	1.46659
345.59	1.06064	345.59	1.46711
345.79	1.05522	345.79	1.46432
345.99	1.05855	345.99	1.46456
346.19	1.05493	346.19	1.46557
346.4	1.06111	346.4	1.462
346.59	1.05881	346.59	1.46611
346.8	1.05743	346.8	1.46701
347	1.05794	347	1.46692
347.2	1.05441	347.2	1.46624
347.4	1.05835	347.4	1.46461
347.6	1.05608	347.6	1.46905
347.8	1.05866	347.8	1.46464
348	1.05998	348	1.46613
348.2	1.05752	348.2	1.46359
348.4	1.05445	348.4	1.46234
348.6	1.05876	348.6	1.4616
348.8	1.0564	348.8	1.46809
348.99	1.05554	348.99	1.46638
349.2	1.0558	349.2	1.46517
349.4	1.05699	349.4	1.46434
349.6	1.06002	349.6	1.46616
349.79	1.05901	349.79	1.466
350	1.05743	350	1.46669
350.2	1.05727	350.2	1.46762
350.4	1.05812	350.4	1.46361
350.6	1.05896	350.6	1.463
350.79	1.05784	350.79	1.46248
351	1.05704	351	1.46863
351.19	1.05673	351.19	1.4681
351.4	1.05695	351.4	1.4659
351.6	1.05654	351.6	1.46675
351.8	1.05563	351.8	1.46183
352	1.05475	352	1.4643
352.19	1.05525	352.19	1.46672
352.4	1.05532	352.4	1.46163
352.6	1.05611	352.6	1.46576
352.8	1.05921	352.8	1.46614
352.99	1.05352	352.99	1.46701
353.2	1.05407	353.2	1.46521
353.4	1.05705	353.4	1.46456
353.6	1.05703	353.6	1.46426
353.8	1.05595	353.8	1.46382
353.99	1.05566	353.99	1.46563
354.2	1.05576	354.2	1.46388
354.4	1.05546	354.4	1.46211
354.6	1.05686	354.6	1.46475
354.79	1.05559	354.79	1.4641
355	1.05784	355	1.46169
355.2	1.05698	355.2	1.46268
355.39	1.05893	355.39	1.46558
355.6	1.05654	355.6	1.46291
355.79	1.05423	355.79	1.46531
356	1.05649	356	1.4647
356.19	1.05741	356.19	1.46458
356.39	1.05354	356.39	1.46299
356.6	1.05545	356.6	1.4641
356.8	1.05467	356.8	1.46578
357	1.05554	357	1.46835
357.19	1.05777	357.19	1.46414
357.4	1.05834	357.4	1.46095
357.59	1.05722	357.59	1.46361
357.8	1.05512	357.8	1.46154
357.99	1.05771	357.99	1.45908
358.2	1.06258	358.2	1.46577
358.4	1.05696	358.4	1.46226
358.6	1.05407	358.6	1.46627
358.8	1.0572	358.8	1.46388
358.99	1.05675	358.99	1.46148
359.2	1.05552	359.2	1.462
359.39	1.05778	359.39	1.46273
359.59	1.05639	359.59	1.46239
359.79	1.05524	359.79	1.46127
360	1.05463	360	1.46165
360.2	1.05571	360.2	1.46236
360.39	1.05392	360.39	1.4619
360.59	1.05415	360.59	1.462
360.79	1.05618	360.79	1.46402
361	1.05586	361	1.46278
361.19	1.05709	361.19	1.46142
361.39	1.05691	361.39	1.45837
361.59	1.05511	361.59	1.46598
361.79	1.0556	361.79	1.46092
362	1.05555	362	1.46157
362.19	1.05704	362.19	1.4614
362.39	1.0573	362.39	1.45998
362.59	1.05636	362.59	1.45884
362.8	1.05683	362.8	1.46189
362.99	1.05647	362.99	1.46089
363.2	1.05529	363.2	1.46241
363.39	1.05167	363.39	1.45991
363.59	1.0528	363.59	1.45887
363.79	1.05508	363.79	1.46007
363.99	1.05803	363.99	1.46149
364.2	1.05467	364.2	1.46209
364.39	1.05337	364.39	1.46135
364.59	1.05446	364.59	1.46222
364.79	1.05691	364.79	1.463
365	1.05507	365	1.46329
365.19	1.05586	365.19	1.46111
365.39	1.05296	365.39	1.46121
365.59	1.05593	365.59	1.45926
365.79	1.05293	365.79	1.45816
366	1.05504	366	1.46366
366.19	1.0551	366.19	1.46045
366.39	1.05591	366.39	1.45339
366.59	1.05555	366.59	1.46033
366.79	1.05535	366.79	1.4676
367	1.05544	367	1.45943
367.19	1.05308	367.19	1.46155
367.39	1.05436	367.39	1.46008
367.59	1.0569	367.59	1.46162
367.79	1.05346	367.79	1.4593
367.99	1.05512	367.99	1.45721
368.2	1.05422	368.2	1.46218
368.39	1.05472	368.39	1.46041
368.59	1.05316	368.59	1.45785
368.79	1.05416	368.79	1.45993
368.99	1.05578	368.99	1.46225
369.2	1.05566	369.2	1.46052
369.4	1.0532	369.4	1.46007
369.6	1.05428	369.6	1.45374
369.8	1.05151	369.8	1.45851
370	1.05212	370	1.46047
370.2	1.05789	370.2	1.45881
370.4	1.05452	370.4	1.46186
370.6	1.05429	370.6	1.46198
370.8	1.05512	370.8	1.45927
370.99	1.05321	370.99	1.45619
371.2	1.05643	371.2	1.45649
371.4	1.05526	371.4	1.45983
371.6	1.0553	371.6	1.45829
371.8	1.05463	371.8	1.4635
372	1.05617	372	1.45479
372.2	1.05765	372.2	1.46056
372.4	1.05305	372.4	1.46029
372.6	1.05977	372.6	1.46035
372.79	1.05363	372.79	1.45622
373	1.05319	373	1.46127
373.19	1.05469	373.19	1.46044
373.4	1.05215	373.4	1.45835
373.6	1.05319	373.6	1.4573
373.8	1.05465	373.8	1.45895
374	1.053	374	1.4611
374.19	1.05251	374.19	1.4544
374.4	1.05419	374.4	1.46231
374.6	1.05377	374.6	1.45639
374.8	1.05255	374.8	1.45967
374.99	1.05517	374.99	1.46091
375.19	1.05394	375.19	1.45677
375.4	1.05595	375.4	1.45907
375.6	1.05138	375.6	1.46154
375.8	1.05456	375.8	1.45744
375.99	1.05352	375.99	1.45725
376.2	1.0505	376.2	1.45674
376.39	1.05078	376.39	1.45713
376.6	1.05182	376.6	1.45916
376.79	1.0541	376.79	1.45734
377	1.0526	377	1.45676
377.2	1.05436	377.2	1.46171
377.39	1.05329	377.39	1.4581
377.6	1.05059	377.6	1.45686
377.79	1.05147	377.79	1.45375
378	1.05351	378	1.45531
378.2	1.05171	378.2	1.45902
378.4	1.05655	378.4	1.45464
378.6	1.05392	378.6	1.45866
378.8	1.05215	378.8	1.45821
379	1.05408	379	1.45788
379.19	1.05587	379.19	1.45815
379.4	1.05484	379.4	1.45561
379.59	1.05625	379.59	1.45811
379.8	1.05278	379.8	1.45856
379.99	1.05101	379.99	1.45272
380.19	1.05299	380.19	1.45866
380.39	1.0534	380.39	1.46189
380.59	1.04998	380.59	1.45726
380.8	1.05136	380.8	1.45553
380.99	1.05284	380.99	1.45799
381.2	1.05383	381.2	1.45547
381.39	1.05614	381.39	1.45796
381.6	1.05302	381.6	1.45511
381.79	1.05556	381.79	1.45717
382	1.05196	382	1.45379
382.2	1.04943	382.2	1.45593
382.39	1.04727	382.39	1.45834
382.59	1.05293	382.59	1.45739
382.79	1.05174	382.79	1.45587
383	1.05226	383	1.4548
383.19	1.05057	383.19	1.45645
383.4	1.05229	383.4	1.45765
383.59	1.0526	383.59	1.45807
383.8	1.0512	383.8	1.45654
384	1.05172	384	1.45778
384.19	1.05373	384.19	1.45328
384.39	1.05551	384.39	1.45591
384.59	1.0519	384.59	1.45287
384.8	1.04909	384.8	1.4583
384.99	1.05404	384.99	1.45514
385.19	1.05273	385.19	1.45772
385.39	1.05361	385.39	1.45331
385.59	1.05235	385.59	1.4596
385.8	1.05036	385.8	1.45231
385.99	1.04909	385.99	1.4587
386.2	1.05021	386.2	1.45778
386.39	1.04899	386.39	1.45274
386.6	1.05382	386.6	1.4542
386.79	1.05255	386.79	1.45562
387	1.05189	387	1.45753
387.19	1.05266	387.19	1.45843
387.39	1.05007	387.39	1.45406
387.59	1.05148	387.59	1.45671
387.79	1.04705	387.79	1.45737
388	1.05176	388	1.4546
388.19	1.05274	388.19	1.45822
388.39	1.05255	388.39	1.4558
388.59	1.0497	388.59	1.45441
388.79	1.04984	388.79	1.45359
388.99	1.05188	388.99	1.4572
389.19	1.05581	389.19	1.45429
389.39	1.05005	389.39	1.45496
389.59	1.05409	389.59	1.45739
389.8	1.04932	389.8	1.45696
389.99	1.05114	389.99	1.4542
390.19	1.05183	390.19	1.45411
390.39	1.05281	390.39	1.45912
390.59	1.05285	390.59	1.45651
390.79	1.05433	390.79	1.45583
390.99	1.04671	390.99	1.45591
391.19	1.05077	391.19	1.459
391.39	1.05062	391.39	1.45595
391.6	1.05044	391.6	1.45713
391.8	1.05114	391.8	1.45795
392	1.04822	392	1.45587
392.2	1.04988	392.2	1.45556
392.4	1.05091	392.4	1.45708
392.6	1.05114	392.6	1.45593
392.8	1.05269	392.8	1.46136
393	1.04906	393	1.4576
393.2	1.04759	393.2	1.46004
393.4	1.05277	393.4	1.45514
393.6	1.05135	393.6	1.45585
393.8	1.04981	393.8	1.4588
394	1.05154	394	1.45459
394.2	1.04879	394.2	1.45452
394.39	1.05265	394.39	1.45179
394.6	1.04872	394.6	1.45037
394.79	1.05306	394.79	1.455
395	1.04553	395	1.45408
395.2	1.05364	395.2	1.45746
395.4	1.04651	395.4	1.45292
395.6	1.04973	395.6	1.45153
395.79	1.04932	395.79	1.45677
396	1.05038	396	1.45201
396.19	1.04977	396.19	1.45112
396.4	1.04996	396.4	1.45298
396.6	1.05151	396.6	1.45712
396.8	1.04968	396.8	1.45475
396.99	1.04946	396.99	1.45467
397.2	1.05059	397.2	1.45111
397.4	1.05055	397.4	1.45499
397.6	1.05265	397.6	1.45234
397.8	1.04931	397.8	1.457
397.99	1.05358	397.99	1.45434
398.2	1.04973	398.2	1.45342
398.39	1.05055	398.39	1.45154
398.6	1.05044	398.6	1.45521
398.8	1.053	398.8	1.45293
399	1.04916	399	1.4535
399.2	1.05319	399.2	1.4537
[truncated: 56,392 more rows]

## Sheet: rep2
2018-10-15	raw data
wt IRE1		dd IRE1
Time (s)	Displacement	Time (s)	Displacement
0	0	0	0	Equilibration in reaction buffer
0.2	-0.0105762	0.2	0.00159276
0.39	-0.0263918	0.39	0.00123597
0.59	-0.0327342	0.59	-0.00025558
0.79	-0.0439933	0.79	0.00037588
1	-0.0477692	1	-0.00186018
1.19	-0.0550905	1.19	-0.00591682
1.39	-0.0621584	1.39	0.00108106
1.59	-0.0632655	1.59	-0.0027279
1.79	-0.0655661	1.79	-0.0021432
1.99	-0.0677367	1.99	0.00189079
2.19	-0.0654551	2.19	0.00205969
2.39	-0.0695923	2.39	0.00025483
2.59	-0.0720732	2.59	-0.00101745
2.79	-0.0740288	2.79	0.00054456
2.99	-0.0714872	2.99	-0.00136162
3.19	-0.0756508	3.19	-0.00196897
3.39	-0.0750954	3.39	-0.00600952
3.59	-0.0766916	3.59	-0.00209711
3.79	-0.0762074	3.79	-0.00211087
3.99	-0.0793245	3.99	-0.00241404
4.19	-0.0793547	4.19	-0.00085342
4.39	-0.0788214	4.39	-0.00360485
4.59	-0.0812336	4.59	-0.00250053
4.8	-0.0800074	4.8	-0.00459305
4.99	-0.085856	4.99	-0.00360599
5.19	-0.0837282	5.19	-0.00164757
5.39	-0.0839042	5.39	-0.00368505
5.59	-0.0797453	5.59	-0.00722531
5.8	-0.0820186	5.8	-0.00513613
5.99	-0.0835619	5.99	-0.00692312
6.19	-0.082631	6.19	-0.0035331
6.39	-0.0785778	6.39	-0.00187881
6.59	-0.0840614	6.59	-0.00414397
6.79	-0.0807723	6.79	-0.00233109
6.99	-0.0785047	6.99	-0.00697295
7.19	-0.0803849	7.19	-0.0049737
7.39	-0.081159	7.39	-0.00177127
7.59	-0.0826254	7.59	-0.00125786
7.8	-0.0825921	7.8	-0.00451372
7.99	-0.077947	7.99	-0.0022476
8.19	-0.0791011	8.19	-0.00266753
8.39	-0.0795341	8.39	-0.00171352
8.59	-0.0772213	8.59	-0.00604305
8.8	-0.0811113	8.8	-0.00402735
8.99	-0.0809194	8.99	-0.00406839
9.19	-0.0777324	9.19	-0.00044426
9.39	-0.0794503	9.39	-0.0052778
9.59	-0.0810175	9.59	-0.00591567
9.8	-0.0805062	9.8	-0.00386115
9.99	-0.0787179	9.99	-0.00829155
10.19	-0.0821734	10.19	-0.00546884
10.39	-0.083443	10.39	-0.00537868
10.6	-0.0801446	10.6	-0.00423605
10.8	-0.0799935	10.8	-0.00476795
10.99	-0.0802509	10.99	-0.00498443
11.19	-0.0793787	11.19	-0.00493522
11.39	-0.0793605	11.39	-0.00463425
11.6	-0.0765644	11.6	-0.00465155
11.79	-0.0791133	11.79	-0.00520569
11.99	-0.0784973	11.99	-0.00115507
12.19	-0.0734318	12.19	-0.00162102
12.39	-0.0788586	12.39	5.089e-05
12.6	-0.0740222	12.6	-0.00136172
12.79	-0.0766097	12.79	0.00089391
12.99	-0.0771023	12.99	-0.0054407
13.19	-0.0765992	13.19	-0.00457203
13.39	-0.0780425	13.39	-0.00116884
13.59	-0.0756436	13.59	-0.0045947
13.8	-0.073844	13.8	-0.00250598
13.99	-0.0746699	13.99	-0.0023223
14.19	-0.0762495	14.19	-0.00125622
14.39	-0.0757534	14.39	-0.00729987
14.59	-0.0769927	14.59	-0.00311614
14.8	-0.0777232	14.8	-0.00208172
14.99	-0.0755424	14.99	-0.0039517
15.19	-0.072701	15.19	5.14e-06
15.39	-0.0754063	15.39	-0.00168656
15.6	-0.075425	15.6	-0.00088496
15.8	-0.0737291	15.8	-0.00260005
15.99	-0.0715927	15.99	-0.002359
16.2	-0.0734183	16.2	0.00067272
16.39	-0.0729656	16.39	-0.0039152
16.6	-0.0738707	16.6	-0.00072286
16.79	-0.0688035	16.79	-0.00160611
17	-0.0731797	17	-0.00234729
17.2	-0.0703889	17.2	-0.00238912
17.39	-0.0730078	17.39	-0.0046441
17.59	-0.0712668	17.59	-0.00099364
17.79	-0.0722398	17.79	-0.00172181
18	-0.0707328	18	-0.00227262
18.19	-0.0712319	18.19	0.00120253
18.4	-0.0670958	18.4	-8.164e-05
18.59	-0.0696218	18.59	-0.00142956
18.8	-0.0688835	18.8	-0.00217805
19	-0.0699242	19	-0.00208918
19.19	-0.0738992	19.19	-0.0009847
19.39	-0.0725502	19.39	-0.00332571
19.59	-0.0737219	19.59	-0.0011411
19.8	-0.0713579	19.8	0.00046808
19.99	-0.0701522	19.99	-0.00029716
20.19	-0.0697737	20.19	-0.0009279
20.39	-0.0699695	20.39	0.00039355
20.6	-0.0690726	20.6	-0.00231847
20.8	-0.0720954	20.8	-0.00073051
20.99	-0.0657876	20.99	-0.00040028
21.19	-0.0666271	21.19	-0.00137603
21.39	-0.0686139	21.39	-0.00111289
21.6	-0.0684135	21.6	0.00199283
21.79	-0.0670493	21.79	-0.00167025
22	-0.0679669	22	0.00309787
22.19	-0.0682282	22.19	0.00122551
22.39	-0.0670552	22.39	0.00085396
22.6	-0.0646289	22.6	0.0026246
22.79	-0.0666255	22.79	0.0028852
23	-0.0676866	23	0.00081506
23.19	-0.0643769	23.19	0.0002936
23.39	-0.0638925	23.39	0.00390937
23.59	-0.0661415	23.59	0.00067907
23.8	-0.0710531	23.8	0.00260095
23.99	-0.0647932	23.99	0.00306158
24.19	-0.0666399	24.19	0.00338344
24.39	-0.0628038	24.39	0.00279669
24.59	-0.0634497	24.59	-0.00073353
24.8	-0.064079	24.8	-0.00013594
24.99	-0.0663405	24.99	0.00205867
25.19	-0.0671983	25.19	0.0004662
25.39	-0.0664533	25.39	0.0017934
25.59	-0.0675872	25.59	0.00145499
25.8	-0.0604321	25.8	0.00350368
25.99	-0.0668831	25.99	0.00423329
26.19	-0.0670068	26.19	0.00087896
26.39	-0.0646785	26.39	0.00447626
26.59	-0.0622153	26.59	0.00167945
26.79	-0.0650623	26.79	0.00345466
26.99	-0.0608594	26.99	0.00244134
27.19	-0.0621298	27.19	0.00444724
27.39	-0.0596961	27.39	0.00179841
27.59	-0.0604496	27.59	0.00303245
27.8	-0.0609024	27.8	0.00097005
28	-0.0582431	28	0.00299836
28.2	-0.0587277	28.2	0.00415468
28.4	-0.0556823	28.4	0.00138457
28.6	-0.0594816	28.6	0.00248331
28.8	-0.0608165	28.8	0.00052938
29	-0.0633414	29	-0.00058418
29.2	-0.0541568	29.2	0.00418672
29.4	-0.0593703	29.4	0.00366743
29.6	-0.0632326	29.6	0.00141775
29.79	-0.0593711	29.79	0.00387509
30	-0.0596239	30	0.00508403
30.2	-0.0598412	30.2	0.00346191
30.4	-0.059938	30.4	0.00157558
30.6	-0.0588818	30.6	0.00196974
30.79	-0.0628585	30.79	0.00220609
31	-0.0600601	31	0.00572928
31.2	-0.060717	31.2	0.00180663
31.4	-0.0599011	31.4	0.0021473
31.6	-0.0603778	31.6	0.00238406
31.8	-0.0571775	31.8	0.00552964
31.99	-0.0596722	31.99	0.00410448
32.19	-0.0573944	32.19	0.00042362
32.4	-0.0581844	32.4	0.00236311
32.59	-0.0539762	32.59	0.00349805
32.79	-0.0542457	32.79	0.0037746
32.99	-0.0555472	32.99	0.00542099
33.19	-0.0539183	33.19	0.00657357
33.4	-0.0556735	33.4	0.00567613
33.59	-0.055501	33.59	0.00577389
33.79	-0.0565722	33.79	0.00632413
33.99	-0.0538926	33.99	0.00872666
34.19	-0.0524884	34.19	0.00513707
34.4	-0.0573366	34.4	0.00390981
34.59	-0.054632	34.59	0.00401765
34.79	-0.0529705	34.79	0.00376926
34.99	-0.0515041	34.99	0.00447508
35.19	-0.0558646	35.19	0.00311884
35.4	-0.0555512	35.4	0.00444516
35.59	-0.0552442	35.59	0.00603498
35.79	-0.056876	35.79	0.00514605
35.99	-0.0580844	35.99	0.00357787
36.19	-0.0552902	36.19	0.0077668
36.4	-0.0531997	36.4	0.00704079
36.59	-0.0541289	36.59	0.00453406
36.79	-0.0544436	36.79	0.00546811
36.99	-0.0530783	36.99	0.00681972
37.19	-0.0526414	37.19	0.00710398
37.39	-0.0524122	37.39	0.00541922
37.59	-0.0509907	37.59	0.00738581
37.79	-0.0506767	37.79	0.010447
37.99	-0.049507	37.99	0.00757437
38.19	-0.0517201	38.19	0.00826778
38.39	-0.051896	38.39	0.00324657
38.59	-0.0511615	38.59	0.00811419
38.79	-0.0493991	38.79	0.00782333
38.99	-0.0512686	38.99	0.0065334
39.19	-0.0468032	39.19	0.00733599
39.4	-0.0515667	39.4	0.00539798
39.59	-0.0527002	39.59	0.00759882
39.79	-0.049097	39.79	0.00573421
39.99	-0.0489232	39.99	0.00780767
40.19	-0.0494646	40.19	0.00772459
40.4	-0.0483828	40.4	0.00609044
40.59	-0.0505233	40.59	0.00900302
40.79	-0.0548956	40.79	0.00893081
40.99	-0.0519633	40.99	0.00449596
41.19	-0.0481403	41.19	0.00807622
41.4	-0.0505353	41.4	0.0109003
41.59	-0.0454463	41.59	0.00694437
41.79	-0.0517294	41.79	0.0061033
41.99	-0.0486017	41.99	0.00875131
42.19	-0.0462032	42.19	0.0105932
42.39	-0.0479752	42.39	0.0067214
42.59	-0.0502985	42.59	0.00867582
42.79	-0.0468877	42.79	0.0111585
42.99	-0.0495283	42.99	0.00784822
43.19	-0.0441664	43.19	0.0101062
43.39	-0.0489088	43.39	0.0103791
43.59	-0.0487384	43.59	0.00694695
43.79	-0.0445447	43.79	0.00812495
43.99	-0.0492339	43.99	0.00692896
44.19	-0.0474749	44.19	0.00953902
44.39	-0.0448091	44.39	0.0076906
44.59	-0.0500447	44.59	0.0107749
44.79	-0.0473251	44.79	0.00902814
44.99	-0.0494266	44.99	0.0106955
45.19	-0.0470217	45.19	0.0112652
45.39	-0.0504889	45.39	0.00800232
45.59	-0.0484641	45.59	0.00967739
45.79	-0.0501645	45.79	0.00986163
45.99	-0.0478342	45.99	0.010328
46.19	-0.0473344	46.19	0.00858014
46.39	-0.0447632	46.39	0.0101675
46.59	-0.044105	46.59	0.00764099
46.79	-0.0468823	46.79	0.00996103
46.99	-0.043838	46.99	0.0121971
47.19	-0.044783	47.19	0.011961
47.39	-0.0454366	47.39	0.0106828
47.59	-0.0421764	47.59	0.0127471
47.79	-0.0448463	47.79	0.0103794
47.99	-0.043994	47.99	0.00961655
48.19	-0.0405792	48.19	0.00949598
48.39	-0.0383021	48.39	0.0122401
48.59	-0.0405303	48.59	0.00992944
48.79	-0.0416718	48.79	0.0135864
48.99	-0.0411157	48.99	0.00832877
49.19	-0.0443345	49.19	0.0098762
49.39	-0.0432142	49.39	0.0118698
49.59	-0.0432101	49.59	0.0100307
49.79	-0.0428444	49.79	0.0141915
49.99	-0.04138	49.99	0.0105996
50.19	-0.0462528	50.19	0.0146012
50.4	-0.0445634	50.4	0.00983107
50.59	-0.0445708	50.59	0.0143
50.79	-0.0403756	50.79	0.0123631
50.99	-0.042561	50.99	0.0120852
51.19	-0.0427926	51.19	0.0124884
51.4	-0.0425073	51.4	0.0104034
51.59	-0.0422625	51.59	0.0124401
51.79	-0.0437765	51.79	0.0130472
51.99	-0.0408991	51.99	0.0120377
52.19	-0.0396507	52.19	0.0143518
52.4	-0.0351923	52.4	0.0143316
52.59	-0.0415831	52.59	0.0148371
52.79	-0.0396167	52.79	0.0149018
52.99	-0.039583	52.99	0.0121052
53.19	-0.037356	53.19	0.0117475
53.4	-0.0397421	53.4	0.0138056
53.59	-0.0422168	53.59	0.0142504
53.79	-0.0367878	53.79	0.0136992
53.99	-0.0388115	53.99	0.016419
54.19	-0.0381515	54.19	0.0128332
54.4	-0.0399926	54.4	0.0127493
54.59	-0.0390227	54.59	0.0148979
54.79	-0.0389916	54.79	0.0108391
54.99	-0.035395	54.99	0.0142825
55.19	-0.0393253	55.19	0.0126494
55.4	-0.0394444	55.4	0.011985
55.59	-0.0376404	55.59	0.013716
55.79	-0.0387685	55.79	0.0143395
55.99	-0.0413037	55.99	0.0132581
56.19	-0.0396341	56.19	0.0158821
56.39	-0.0386761	56.39	0.0139304
56.59	-0.04001	56.59	0.0131428
56.79	-0.0362692	56.79	0.0145231
56.99	-0.0354682	56.99	0.0149348
57.19	-0.0353422	57.19	0.0152993
57.4	-0.0378397	57.4	0.0150776
57.59	-0.0354003	57.59	0.0121823
57.79	-0.0342155	57.79	0.0195455
57.99	-0.0345817	57.99	0.0162242
58.19	-0.0349828	58.19	0.0150961
58.4	-0.0372813	58.4	0.0161212
58.59	-0.0332462	58.59	0.0128601
58.79	-0.0352343	58.79	0.0145674
58.99	-0.0327511	58.99	0.0179064
59.19	-0.0348324	59.19	0.0162277
59.4	-0.0370002	59.4	0.0173297
59.59	-0.0384531	59.59	0.0147652
59.79	-0.0331148	59.79	0.0120991
59.99	-0.0374919	59.99	0.0167071
60.19	-0.0352317	60.19	0.0144671
60.39	-0.0374365	60.39	0.0151836
60.59	-0.0370107	60.59	0.0134057
60.79	-0.0354726	60.79	0.0165881
60.99	-0.0384777	60.99	0.0166393
61.19	-0.0308495	61.19	0.01648
61.39	-0.0358541	61.39	0.0191646
61.59	-0.0316503	61.59	0.0181568
61.79	-0.0362403	61.79	0.0185206
61.99	-0.0315184	61.99	0.0166038
62.19	-0.0304689	62.19	0.0155093
62.39	-0.0336298	62.39	0.0179211
62.59	-0.0290498	62.59	0.0182282
62.79	-0.0297461	62.79	0.014812
62.99	-0.0337866	62.99	0.0183959
63.19	-0.0317392	63.19	0.0156776
63.4	-0.0311374	63.4	0.0156896
63.59	-0.0273776	63.59	0.0160469
63.79	-0.0332196	63.79	0.0188498
63.99	-0.0319637	63.99	0.0176729
64.19	-0.0334207	64.19	0.0157524
64.39	-0.0306998	64.39	0.0173485
64.59	-0.0326078	64.59	0.016585
64.8	-0.0297511	64.8	0.0160878
64.99	-0.0326065	64.99	0.0175123
65.2	-0.0311677	65.2	0.0177131
65.4	-0.0309189	65.4	0.0195175
65.6	-0.0320348	65.6	0.0178797
65.8	-0.0321898	65.8	0.0181494
65.99	-0.0351223	65.99	0.0187102
66.19	-0.0307285	66.19	0.0193647
66.39	-0.0267719	66.39	0.018187
66.6	-0.0334082	66.6	0.0175047
66.79	-0.0308728	66.79	0.0201053
67	-0.0301216	67	0.0148072
67.19	-0.0284251	67.19	0.0185074
67.4	-0.027475	67.4	0.0215745
67.6	-0.0300026	67.6	0.0184632
67.79	-0.030385	67.79	0.0199728
67.99	-0.0298439	67.99	0.0202533
68.19	-0.028816	68.19	0.0206606
68.39	-0.0299707	68.39	0.0175872
68.59	-0.0264947	68.59	0.0189871
68.8	-0.0279302	68.8	0.019913
68.99	-0.0291465	68.99	0.0205748
69.19	-0.0275842	69.19	0.0172917
69.39	-0.0267158	69.39	0.0170929
69.59	-0.025229	69.59	0.0180882
69.79	-0.0262569	69.79	0.0194962
69.99	-0.028739	69.99	0.0214989
70.19	-0.0293671	70.19	0.0197679
70.39	-0.0286135	70.39	0.0172199
70.59	-0.0308688	70.59	0.0200996
70.79	-0.0271807	70.79	0.0192614
70.99	-0.0274015	70.99	0.0222554
71.19	-0.0304539	71.19	0.0181332
71.39	-0.0285422	71.39	0.0210445
71.6	-0.0250148	71.6	0.0186521
71.79	-0.0249781	71.79	0.0218787
71.99	-0.0246862	71.99	0.0212823
72.19	-0.0236926	72.19	0.022764
72.39	-0.0259186	72.39	0.0205944
72.59	-0.0232146	72.59	0.0206693
72.8	-0.0251395	72.8	0.0207727
73	-0.0277416	73	0.0208823
73.19	-0.0249184	73.19	0.0205495
73.4	-0.0234441	73.4	0.0208399
73.6	-0.0246323	73.6	0.0232717
73.79	-0.0224262	73.79	0.0200602
74	-0.0234246	74	0.0192946
74.19	-0.0295435	74.19	0.0227235
74.4	-0.0228511	74.4	0.0207551
74.6	-0.0248772	74.6	0.0214108
74.79	-0.021905	74.79	0.0219841
75	-0.0230949	75	0.0222717
75.19	-0.0258784	75.19	0.0228805
75.4	-0.0261097	75.4	0.0230314
75.6	-0.0236741	75.6	0.0191963
75.8	-0.0263113	75.8	0.0227237
76	-0.0246282	76	0.021166
76.19	-0.0238809	76.19	0.0254627
76.4	-0.0260885	76.4	0.0234006
76.6	-0.0243926	76.6	0.0217421
76.8	-0.0231243	76.8	0.0221241
76.99	-0.0190627	76.99	0.0219358
77.19	-0.0215406	77.19	0.0223814
77.4	-0.0208613	77.4	0.0221656
77.6	-0.0242821	77.6	0.0267294
77.8	-0.0196455	77.8	0.0247369
77.99	-0.0189701	77.99	0.0226722
78.19	-0.0180852	78.19	0.0225046
78.4	-0.0196999	78.4	0.0225933
78.6	-0.0210812	78.6	0.0228835
78.79	-0.0213914	78.79	0.0230603
79	-0.0188074	79	0.0229876
79.19	-0.0234885	79.19	0.0231709
79.4	-0.0223183	79.4	0.0203389
79.6	-0.0248735	79.6	0.025964
79.79	-0.0248666	79.79	0.0232077
80	-0.0224732	80	0.0243626
80.19	-0.0237684	80.19	0.0256304
80.4	-0.0251036	80.4	0.0228988
80.59	-0.0204626	80.59	0.0210422
80.8	-0.0221889	80.8	0.0230836
81	-0.0189628	81	0.0241679
81.19	-0.0207371	81.19	0.0222034
81.4	-0.0199296	81.4	0.0246678
81.59	-0.016589	81.59	0.0250169
81.8	-0.020792	81.8	0.0244096
81.99	-0.0215493	81.99	0.0231297
82.19	-0.0143973	82.19	0.025132
82.39	-0.0205892	82.39	0.0252436
82.6	-0.0194749	82.6	0.0231464
82.8	-0.0185896	82.8	0.0282787
82.99	-0.0177095	82.99	0.0232136
83.19	-0.0159382	83.19	0.0246563
83.39	-0.0177263	83.39	0.0239821
83.6	-0.0181463	83.6	0.0258035
83.79	-0.0196466	83.79	0.0296344
84	-0.0184698	84	0.024463
84.19	-0.022084	84.19	0.0236932
84.39	-0.0195252	84.39	0.0262052
84.6	-0.019057	84.6	0.024256
84.79	-0.0213859	84.79	0.0235601
85	-0.0196343	85	0.0295592
85.19	-0.0194572	85.19	0.0265281
85.4	-0.0191802	85.4	0.0269806
85.59	-0.0205743	85.59	0.0239666
85.8	-0.0165159	85.8	0.0240625
85.99	-0.0211399	85.99	0.0269234
86.19	-0.0179968	86.19	0.029779
86.39	-0.0174551	86.39	0.0277664
86.59	-0.0170432	86.59	0.0276106
86.8	-0.0134819	86.8	0.0268541
86.99	-0.019205	86.99	0.026635
87.19	-0.0173703	87.19	0.0275296
87.39	-0.0124096	87.39	0.0258792
87.6	-0.014823	87.6	0.025339
87.8	-0.0130369	87.8	0.0262465
87.99	-0.0114898	87.99	0.0256841
88.19	-0.0143809	88.19	0.0286021
88.39	-0.013912	88.39	0.0302386
88.6	-0.0159427	88.6	0.0278275
88.79	-0.0186449	88.79	0.0288092
88.99	-0.0198975	88.99	0.0268147
89.19	-0.013416	89.19	0.0284618
89.39	-0.0150037	89.39	0.0285228
89.6	-0.0157497	89.6	0.0287737
89.79	-0.0158987	89.79	0.025297
90	-0.0190707	90	0.0306303
90.19	-0.0115477	90.19	0.0257689
90.39	-0.017072	90.39	0.0312687
90.59	-0.0134241	90.59	0.0271029
90.8	-0.0140768	90.8	0.0310713
90.99	-0.0163534	90.99	0.0283371
91.19	-0.0132669	91.19	0.0300767
91.39	-0.012142	91.39	0.0282533
91.59	-0.0123471	91.59	0.0320575
91.8	-0.0148267	91.8	0.0295869
91.99	-0.00987628	91.99	0.0289415
92.19	-0.00947212	92.19	0.0319266
92.39	-0.0117491	92.39	0.0293054
92.6	-0.0144692	92.6	0.0280315
92.79	-0.0111322	92.79	0.0295694
92.99	-0.0132579	92.99	0.0286321
93.19	-0.0167917	93.19	0.0287234
93.39	-0.00917314	93.39	0.0304748
93.59	-0.0145901	93.59	0.0281069
93.79	-0.0152239	93.79	0.0321788
93.99	-0.0153438	93.99	0.0327776
94.19	-0.0164076	94.19	0.0273317
94.39	-0.0113036	94.39	0.033551
94.59	-0.014665	94.59	0.0289587
94.79	-0.0125592	94.79	0.0279291
94.99	-0.00858916	94.99	0.0311151
95.19	-0.010223	95.19	0.0314342
95.4	-0.0136704	95.4	0.0308858
95.6	-0.0116529	95.6	0.0269772
95.8	-0.014902	95.8	0.0267657
96	-0.0112334	96	0.0289196
96.19	-0.0124032	96.19	0.031367
96.4	-0.00905744	96.4	0.0328923
96.6	-0.0102132	96.6	0.031246
96.8	-0.00690839	96.8	0.0305068
97	-0.0094713	97	0.0307568
97.19	-0.00684953	97.19	0.0289616
97.4	-0.00714528	97.4	0.0293552
97.6	-0.00800108	97.6	0.0325893
97.79	-0.0108037	97.79	0.0305811
98	-0.00623122	98	0.0279089
98.19	-0.00713348	98.19	0.0331305
98.4	-0.00959817	98.4	0.0316342
98.59	-0.00780305	98.59	0.0312448
98.8	-0.00830944	98.8	0.0294983
99	-0.0110161	99	0.0300336
99.19	-0.00923485	99.19	0.0313467
99.4	-0.0131517	99.4	0.0330774
99.59	-0.0104384	99.59	0.0303221
99.8	-0.00994492	99.8	0.0338458
100	-0.00878965	100	0.03118
100.19	-0.0112641	100.19	0.0317907
100.4	-0.0108739	100.4	0.028316
100.6	-0.00875522	100.6	0.0295468
100.79	-0.00864574	100.79	0.0319022
101	-0.00533954	101	0.031278
101.19	-0.00776308	101.19	0.0319072
101.4	-0.00828864	101.4	0.0315217
101.6	-0.00837048	101.6	0.0336915
101.79	-0.00968373	101.79	0.0322004
102	-0.00861621	102	0.0314706
102.19	-0.00796916	102.19	0.0310755
102.4	-0.0058414	102.4	0.0360946
102.59	-0.00613714	102.59	0.0338234
102.8	-0.00670149	102.8	0.0336931
103	-0.0102691	103	0.0329097
103.19	-0.00966305	103.19	0.0316278
103.4	-0.00963689	103.4	0.0355356
103.59	-0.00515256	103.59	0.0345798
103.8	-0.00856828	103.8	0.0346902
104	-0.00968852	104	0.0335927
104.19	-0.00915945	104.19	0.0345852
104.4	-0.00534704	104.4	0.0312257
104.59	-0.00522059	104.59	0.0325544
104.8	-0.00756544	104.8	0.0346671
104.99	-0.00580284	104.99	0.0332413
105.19	-0.0109437	105.19	0.0334368
105.39	-0.00748679	105.39	0.0329626
105.6	-0.00996153	105.6	0.0334299
105.8	-0.00768466	105.8	0.0360569
105.99	-0.00469529	105.99	0.0351439
106.19	-0.00531836	106.19	0.0355434
106.4	-0.0030318	106.4	0.0309704
106.6	-0.00371792	106.6	0.0327995
106.79	-0.005598	106.79	0.031892
107	-0.00527499	107	0.0327507
107.19	-0.00328945	107.19	0.03267
107.4	-0.00694099	107.4	0.0302462
107.59	-0.00569591	107.59	0.0358805
107.79	-0.00457992	107.79	0.0335072
108	-0.00312334	108	0.0326607
108.19	-0.00507745	108.19	0.0316787
108.4	-0.00557105	108.4	0.0371404
108.59	-0.00218995	108.59	0.0337592
108.8	-0.00605478	108.8	0.0361038
108.99	-0.00356599	108.99	0.0340067
109.19	-0.00319305	109.19	0.036282
109.39	-0.00405001	109.39	0.0341512
109.6	-0.00167683	109.6	0.0354409
109.8	-0.00772116	109.8	0.0355638
109.99	-0.00295449	109.99	0.0333239
110.19	-0.00727545	110.19	0.034545
110.4	-0.00529766	110.4	0.0342499
110.59	-0.00309497	110.59	0.0346412
110.79	-0.00510911	110.79	0.0342218
110.99	-0.00233036	110.99	0.037398
111.19	-0.00137764	111.19	0.0331174
111.39	-0.00427421	111.39	0.0383198
111.6	-0.00169405	111.6	0.0369451
111.79	-0.00400799	111.79	0.0380096
111.99	-0.00388706	111.99	0.0364985
112.19	-0.00236557	112.19	0.0380052
112.4	-0.00236035	112.4	0.0378163
112.59	-0.00156137	112.59	0.0362527
112.79	-0.00304724	112.79	0.0359095
112.99	-0.00298609	112.99	0.0359664
113.19	-0.0033794	113.19	0.034587
113.39	-0.00074665	113.39	0.0337974
113.59	-0.00151613	113.59	0.0341311
113.79	-0.00523919	113.79	0.0372724
113.99	-0.00354189	113.99	0.0359447
114.19	-0.00386283	114.19	0.033448
114.39	-0.00098654	114.39	0.0396466
114.59	-8.931e-05	114.59	0.0342017
114.79	-0.00300009	114.79	0.0373548
114.99	-0.00265591	114.99	0.0360701
115.19	-0.00122439	115.19	0.036491
115.39	-0.00156559	115.39	0.0343232
115.59	0.00055291	115.59	0.0396434
115.79	-0.00194691	115.79	0.0367435
115.99	-0.00050306	115.99	0.0384448
116.19	0.00073703	116.19	0.0391832
116.39	0.00277459	116.39	0.037146
116.59	-0.00106807	116.59	0.0398074
116.79	-0.00153945	116.79	0.0402916
116.99	0.00146931	116.99	0.0398315
117.19	0.00056159	117.19	0.0387603
117.4	-0.0008774	117.4	0.0389535
117.6	0.002705	117.6	0.0370122
117.8	0.00327073	117.8	0.0419074
118	-0.00051676	118	0.0385489
118.19	0.00108234	118.19	0.0427758
118.4	-0.00030304	118.4	0.037606
118.6	-0.00030735	118.6	0.0377852
118.8	0.00202211	118.8	0.0365112
119	0.00052732	119	0.0392154
119.19	-0.00167052	119.19	0.0369974	Loading of proteins to tip
119.4	0.00043098	119.4	0.0386793
119.6	-0.00049144	119.6	0.0375185
119.8	0.00059228	119.8	0.0389149
120	0.0148226	120	0.0314683
120.19	0.00864205	120.19	0.0290648
120.4	0.00498093	120.4	0.0245587
120.59	-0.00195544	120.59	0.0222936
120.8	-0.00406601	120.8	0.0233333
121	-0.00980281	121	0.0157683
121.19	-0.0114741	121.19	0.0101747
121.39	-0.0135677	121.39	0.012668
121.6	-0.0148804	121.6	0.00898869
121.8	-0.0171632	121.8	0.0121589
122	-0.0205674	122	0.0110097
122.19	-0.0209319	122.19	0.0110269
122.39	-0.0216956	122.39	0.011096
122.6	-0.0211058	122.6	0.00698235
122.79	-0.0209576	122.79	0.00662923
123	-0.0224919	123	0.00700926
123.19	-0.0257882	123.19	0.00518646
123.4	-0.0281658	123.4	0.00699791
123.6	-0.0282088	123.6	0.00632954
123.79	-0.0295497	123.79	0.00229003
124	-0.0260986	124	0.00870254
124.19	-0.0293988	124.19	0.00583668
124.4	-0.0293402	124.4	0.00589578
124.59	-0.0320868	124.59	0.00577839
124.79	-0.0320145	124.79	0.00795503
124.99	-0.0298094	124.99	0.00748382
125.19	-0.0314771	125.19	0.00704791
125.4	-0.0321611	125.4	0.005914
125.59	-0.0311842	125.59	0.00630266
125.8	-0.0253623	125.8	0.0129096
125.99	-0.0246369	125.99	0.00694087
126.19	-0.0252259	126.19	0.0110532
126.39	-0.0249391	126.39	0.0112023
126.6	-0.0231422	126.6	0.00973199
126.79	-0.0223963	126.79	0.0131818
127	-0.0200806	127	0.0151652
127.19	-0.0223493	127.19	0.0143862
127.39	-0.0165279	127.39	0.0142874
127.6	-0.0189619	127.6	0.0165572
127.79	-0.015034	127.79	0.0176041
127.99	-0.0181087	127.99	0.0187972
128.19	-0.0147639	128.19	0.0181279
128.39	-0.0142135	128.39	0.0209082
128.59	-0.0113663	128.59	0.018125
128.79	-0.0142592	128.79	0.0191058
128.99	-0.0144014	128.99	0.0222186
129.19	-0.0142862	129.19	0.0208726
129.39	-0.014393	129.39	0.0204724
129.59	-0.0163143	129.59	0.0213397
129.79	-0.0124534	129.79	0.0205766
129.99	-0.00972288	129.99	0.0223812
130.19	-0.0143567	130.19	0.0204984
130.39	-0.0108427	130.39	0.0222586
130.59	-0.0114597	130.59	0.024152
130.79	-0.0110982	130.79	0.0244807
130.99	-0.0071777	130.99	0.0264685
131.19	-0.0073018	131.19	0.0266251
131.39	-0.00262293	131.39	0.0248454
131.59	-0.00272754	131.59	0.0270171
131.79	-0.00367902	131.79	0.0306921
131.99	-0.0040476	131.99	0.0264667
132.19	-0.00149081	132.19	0.0283983
132.39	0.00032742	132.39	0.0316628
132.59	0.00242089	132.59	0.0302803
132.79	0.00480718	132.79	0.0340668
132.99	0.00585242	132.99	0.0329174
133.19	0.00418945	133.19	0.0320775
133.39	0.00763506	133.39	0.0344738
133.59	0.00816385	133.59	0.0335549
133.79	0.00616148	133.79	0.0338128
133.99	0.00637943	133.99	0.0383671
134.19	0.00891553	134.19	0.0373895
134.39	0.00527119	134.39	0.035001
134.6	0.0045533	134.6	0.0358985
134.79	0.00339201	134.79	0.0386005
134.99	0.00891131	134.99	0.0361001
135.19	0.00614411	135.19	0.0359182
135.39	0.00846929	135.39	0.0363973
135.6	0.00859071	135.6	0.0411759
135.79	0.00722648	135.79	0.0379835
135.99	0.0105431	135.99	0.0403305
136.19	0.00997143	136.19	0.0409335
136.39	0.0149966	136.39	0.0425861
136.59	0.0152708	136.59	0.0427473
136.79	0.0194473	136.79	0.0420378
136.99	0.0180984	136.99	0.0458446
137.19	0.0237939	137.19	0.045855
137.39	0.0230086	137.39	0.0476363
137.6	0.0196143	137.6	0.0466524
137.79	0.0228835	137.79	0.0470212
137.99	0.023735	137.99	0.0483323
138.19	0.0225912	138.19	0.0489273
138.39	0.025726	138.39	0.0514479
138.59	0.0235964	138.59	0.0517441
138.79	0.0264701	138.79	0.0526683
138.99	0.0256562	138.99	0.0528376
139.19	0.024856	139.19	0.0527532
139.39	0.0258637	139.39	0.0514606
139.6	0.0269068	139.6	0.0494608
139.79	0.0248268	139.79	0.054591
139.99	0.0297668	139.99	0.0555362
140.19	0.0289624	140.19	0.0527245
140.39	0.0273272	140.39	0.0555091
140.6	0.0339237	140.6	0.0553354
140.79	0.0295784	140.79	0.0582609
140.99	0.0318085	140.99	0.0568165
141.19	0.0344406	141.19	0.054977
141.39	0.0346272	141.39	0.060767
141.6	0.0355761	141.6	0.0579172
141.79	0.0370719	141.79	0.0619446
141.99	0.0440702	141.99	0.0618195
142.19	0.0391016	142.19	0.061369
142.39	0.0404796	142.39	0.0601155
142.59	0.0417065	142.59	0.0624931
142.79	0.0455372	142.79	0.062095
142.99	0.0444923	142.99	0.0630091
143.19	0.0463469	143.19	0.0661114
143.39	0.0474498	143.39	0.0663894
143.59	0.0477045	143.59	0.0631248
143.79	0.0463377	143.79	0.0667123
143.99	0.0483352	143.99	0.0631981
144.19	0.0419909	144.19	0.066922
144.39	0.0446253	144.39	0.0676815
144.6	0.0471032	144.6	0.0626192
144.79	0.047032	144.79	0.0690415
144.99	0.0477976	144.99	0.0708053
145.19	0.0483	145.19	0.0680222
145.39	0.0498105	145.39	0.0692074
145.6	0.0543858	145.6	0.06597
145.79	0.0520971	145.79	0.0690266
145.99	0.0553225	145.99	0.0667071
146.19	0.0576638	146.19	0.0695922
146.39	0.0573569	146.39	0.0736824
146.6	0.0586015	146.6	0.0737356
146.79	0.0593552	146.79	0.0753011
146.99	0.0620638	146.99	0.0766931
147.19	0.0599818	147.19	0.0817263
147.39	0.0625523	147.39	0.0746941
147.59	0.0642948	147.59	0.0771175
147.79	0.0637989	147.79	0.0768142
147.99	0.066848	147.99	0.0782782
148.19	0.0660602	148.19	0.0807004
148.39	0.068223	148.39	0.0809449
148.59	0.0698234	148.59	0.0816965
148.79	0.0651361	148.79	0.0781226
148.99	0.0665955	148.99	0.076498
149.19	0.0656364	149.19	0.0817953
149.39	0.0632261	149.39	0.0804913
149.6	0.0668976	149.6	0.0817413
149.79	0.0692391	149.79	0.081676
149.99	0.0697161	149.99	0.0814494
150.19	0.0713136	150.19	0.0847721
150.39	0.0702667	150.39	0.0859759
150.6	0.0703507	150.6	0.0832197
150.79	0.0761713	150.79	0.0858994
150.99	0.0699654	150.99	0.0861983
151.19	0.0756315	151.19	0.088122
151.39	0.080078	151.39	0.0917448
151.6	0.078164	151.6	0.085852
151.79	0.0804045	151.79	0.0902973
151.99	0.0804036	151.99	0.0896236
152.19	0.0841266	152.19	0.0928901
152.39	0.0831493	152.39	0.0926826
152.59	0.0885091	152.59	0.095404
152.79	0.0858848	152.79	0.095294
152.99	0.0855887	152.99	0.0957667
153.19	0.0895355	153.19	0.0953386
153.39	0.0845157	153.39	0.0951078
153.59	0.0884128	153.59	0.0963593
153.79	0.0864284	153.79	0.0915908
153.99	0.0854482	153.99	0.0944988
154.19	0.0894267	154.19	0.0951537
154.39	0.0890842	154.39	0.0975496
154.59	0.0864178	154.59	0.098334
154.79	0.0927516	154.79	0.0985542
154.99	0.0871127	154.99	0.0975203
155.19	0.0923347	155.19	0.0994512
155.39	0.0937287	155.39	0.100598
155.59	0.0924498	155.59	0.10006
155.79	0.0951758	155.79	0.0997184
155.99	0.095564	155.99	0.103034
156.19	0.0961852	156.19	0.103132
156.39	0.101749	156.39	0.105351
156.59	0.0995229	156.59	0.103601
156.79	0.101978	156.79	0.10501
156.99	0.0993516	156.99	0.106118
157.19	0.10387	157.19	0.105338
157.39	0.106729	157.39	0.106233
157.6	0.104699	157.6	0.106244
157.79	0.108872	157.79	0.109008
157.99	0.102516	157.99	0.108767
158.19	0.109326	158.19	0.107882
158.39	0.105431	158.39	0.112757
158.6	0.106483	158.6	0.10831
158.79	0.10905	158.79	0.109642
158.99	0.110229	158.99	0.111866
159.19	0.108286	159.19	0.107005
159.39	0.108343	159.39	0.108182
159.59	0.110585	159.59	0.111718
159.79	0.109134	159.79	0.115822
159.99	0.110448	159.99	0.113879
160.19	0.111843	160.19	0.11318
160.39	0.113666	160.39	0.114717
160.6	0.115672	160.6	0.11433
160.79	0.114391	160.79	0.115073
160.99	0.113087	160.99	0.112513
161.19	0.117828	161.19	0.116809
161.39	0.123189	161.39	0.118489
161.6	0.126541	161.6	0.119952
161.79	0.124162	161.79	0.120052
161.99	0.123951	161.99	0.120725
162.19	0.122301	162.19	0.120144
162.39	0.127958	162.39	0.122515
162.6	0.127757	162.6	0.124711
162.79	0.127272	162.79	0.1247
162.99	0.126868	162.99	0.123884
163.19	0.129465	163.19	0.126108
163.39	0.130692	163.39	0.123726
163.6	0.125923	163.6	0.125292
163.79	0.129691	163.79	0.123505
163.99	0.129387	163.99	0.121307
164.19	0.129088	164.19	0.123394
164.39	0.131342	164.39	0.129291
164.6	0.129996	164.6	0.126176
164.79	0.132062	164.79	0.125064
164.99	0.13167	164.99	0.128281
165.19	0.134785	165.19	0.126716
165.39	0.134558	165.39	0.127597
165.59	0.131833	165.59	0.131787
165.79	0.138735	165.79	0.130378
165.99	0.141599	165.99	0.133072
166.19	0.142055	166.19	0.13226
166.39	0.142182	166.39	0.131801
166.6	0.145231	166.6	0.1328
166.79	0.146396	166.79	0.136212
166.99	0.144764	166.99	0.136926
167.19	0.146144	167.19	0.135585
167.39	0.146461	167.39	0.136241
167.6	0.150249	167.6	0.138522
167.79	0.151673	167.79	0.137815
167.99	0.148171	167.99	0.137237
168.19	0.148625	168.19	0.136718
168.39	0.151032	168.39	0.138768
168.6	0.15341	168.6	0.140505
168.79	0.148563	168.79	0.138666
168.99	0.152755	168.99	0.137982
169.19	0.151607	169.19	0.142261
169.39	0.155757	169.39	0.1423
169.59	0.150837	169.59	0.143066
169.79	0.151811	169.79	0.141218
169.99	0.152143	169.99	0.143949
170.19	0.154733	170.19	0.141625
170.39	0.157171	170.39	0.143437
170.59	0.158867	170.59	0.143979
170.79	0.158853	170.79	0.146282
170.99	0.16075	170.99	0.144073
171.19	0.163892	171.19	0.145363
171.39	0.162247	171.39	0.14708
171.6	0.163639	171.6	0.150971
171.79	0.165019	171.79	0.151225
171.99	0.167928	171.99	0.146719
172.19	0.166887	172.19	0.148976
172.39	0.16971	172.39	0.15238
172.6	0.168712	172.6	0.149922
172.79	0.169719	172.79	0.15327
172.99	0.168592	172.99	0.149929
173.19	0.169945	173.19	0.151854
173.39	0.17219	173.39	0.153133
173.6	0.172005	173.6	0.151826
173.79	0.171995	173.79	0.154398
173.99	0.169476	173.99	0.157093
174.19	0.172264	174.19	0.153756
174.39	0.172643	174.39	0.152789
174.59	0.17518	174.59	0.153914
174.79	0.177021	174.79	0.157008
174.99	0.17434	174.99	0.157228
175.19	0.169623	175.19	0.158022
175.39	0.180298	175.39	0.156527
175.59	0.177221	175.59	0.158783
175.79	0.178463	175.79	0.158178
175.99	0.182686	175.99	0.161748
176.19	0.180607	176.19	0.162781
176.39	0.182697	176.39	0.163214
176.59	0.181959	176.59	0.166145
176.79	0.187011	176.79	0.160471
176.99	0.188287	176.99	0.165551
177.19	0.190661	177.19	0.161152
177.39	0.192293	177.39	0.167679
177.6	0.191987	177.6	0.164135
177.79	0.190977	177.79	0.166591
177.99	0.193545	177.99	0.167413
178.19	0.19105	178.19	0.167401
178.39	0.189557	178.39	0.166476
178.59	0.192252	178.59	0.169419
178.79	0.191038	178.79	0.167328
178.99	0.190914	178.99	0.167166
179.19	0.194763	179.19	0.169733
179.4	0.192467	179.4	0.170273
179.6	0.189458	179.6	0.170589
179.79	0.194294	179.79	0.171802
179.99	0.198968	179.99	0.171895
180.19	0.194175	180.19	0.174701
180.39	0.194201	180.39	0.174297
180.6	0.199179	180.6	0.17376
180.79	0.199483	180.79	0.172435
180.99	0.200481	180.99	0.173142
181.19	0.205432	181.19	0.173004
181.39	0.202452	181.39	0.175912
181.6	0.207828	181.6	0.177259
181.79	0.210389	181.79	0.178344
181.99	0.20824	181.99	0.183255
182.19	0.208141	182.19	0.181006
182.39	0.209177	182.39	0.181267
182.6	0.212275	182.6	0.180306
182.79	0.218249	182.79	0.184211
182.99	0.211144	182.99	0.185352
183.19	0.212745	183.19	0.183385
183.39	0.211341	183.39	0.182605
183.6	0.217749	183.6	0.181883
183.79	0.213216	183.79	0.18349
183.99	0.209245	183.99	0.182941
184.19	0.216229	184.19	0.182103
184.39	0.214956	184.39	0.182226
184.6	0.211008	184.6	0.184258
184.79	0.212937	184.79	0.186602
184.99	0.216359	184.99	0.18952
185.19	0.217948	185.19	0.188777
185.39	0.219206	185.39	0.187905
185.6	0.219472	185.6	0.185474
185.79	0.220794	185.79	0.189522
185.99	0.22483	185.99	0.188971
186.19	0.224444	186.19	0.185856
186.39	0.228209	186.39	0.192027
186.59	0.23253	186.59	0.19141
186.79	0.227378	186.79	0.193318
186.99	0.232051	186.99	0.192883
187.19	0.228706	187.19	0.195793
187.39	0.232804	187.39	0.195403
187.59	0.232864	187.59	0.194776
187.79	0.22973	187.79	0.1918
187.99	0.232087	187.99	0.193432
188.19	0.232359	188.19	0.195725
188.39	0.233099	188.39	0.1948
188.6	0.231546	188.6	0.193871
188.79	0.227672	188.79	0.196255
188.99	0.235104	188.99	0.196077
189.19	0.235726	189.19	0.193978
189.39	0.234029	189.39	0.201479
189.6	0.234711	189.6	0.19811
189.79	0.234806	189.79	0.202576
189.99	0.239503	189.99	0.204533
190.19	0.24139	190.19	0.202917
190.39	0.240504	190.39	0.204398
190.6	0.239885	190.6	0.20574
190.79	0.24577	190.79	0.205618
190.99	0.245549	190.99	0.205873
191.19	0.247031	191.19	0.203274
191.39	0.248811	191.39	0.206611
191.59	0.245793	191.59	0.208791
191.79	0.250695	191.79	0.207346
191.99	0.251743	191.99	0.209535
192.19	0.249922	192.19	0.212446
192.39	0.250695	192.39	0.208899
192.59	0.253108	192.59	0.209506
192.79	0.249589	192.79	0.209763
192.99	0.25809	192.99	0.211671
193.19	0.25463	193.19	0.209153
193.39	0.256887	193.39	0.207728
193.6	0.254349	193.6	0.212304
193.79	0.253748	193.79	0.206476
193.99	0.25248	193.99	0.209284
194.19	0.255739	194.19	0.213666
194.39	0.257242	194.39	0.21158
194.6	0.257787	194.6	0.213791
194.79	0.255979	194.79	0.213462
194.99	0.258031	194.99	0.214998
195.19	0.257933	195.19	0.217197
195.39	0.261993	195.39	0.217025
195.59	0.262957	195.59	0.215853
195.79	0.265361	195.79	0.217549
195.99	0.268266	195.99	0.221035
196.19	0.267734	196.19	0.217387
196.39	0.267626	196.39	0.217437
196.59	0.269197	196.59	0.218813
196.79	0.268274	196.79	0.219301
196.99	0.271801	196.99	0.218819
197.19	0.27258	197.19	0.224132
197.39	0.270803	197.39	0.225823
197.59	0.27507	197.59	0.224333
197.79	0.271892	197.79	0.22676
197.99	0.272333	197.99	0.225517
198.19	0.273398	198.19	0.227508
198.39	0.274614	198.39	0.224113
198.59	0.27358	198.59	0.225817
198.79	0.274459	198.79	0.224761
198.99	0.273002	198.99	0.226663
199.19	0.277753	199.19	0.225023
199.39	0.277466	199.39	0.226685
199.6	0.277196	199.6	0.227992
199.79	0.277313	199.79	0.228596
199.99	0.280013	199.99	0.22817
200.19	0.279344	200.19	0.231034
200.39	0.27794	200.39	0.227322
200.59	0.284792	200.59	0.229235
200.79	0.284591	200.79	0.234283
200.99	0.287741	200.99	0.234226
201.19	0.286202	201.19	0.232356
201.39	0.291432	201.39	0.234118
201.59	0.289121	201.59	0.237021
201.79	0.293106	201.79	0.237516
201.99	0.295734	201.99	0.238557
202.19	0.293443	202.19	0.239314
202.39	0.297167	202.39	0.236888
202.6	0.296092	202.6	0.240563
202.79	0.298286	202.79	0.237324
202.99	0.29245	202.99	0.235104
203.19	0.293491	203.19	0.235666
203.39	0.297428	203.39	0.242312
203.6	0.296641	203.6	0.237783
203.79	0.297364	203.79	0.239735
203.99	0.297573	203.99	0.238778
204.19	0.300069	204.19	0.240364
204.39	0.295532	204.39	0.242072
204.6	0.295936	204.6	0.244711
204.79	0.298228	204.79	0.244264
204.99	0.298908	204.99	0.244705
205.19	0.299617	205.19	0.244327
205.39	0.303272	205.39	0.244002
205.6	0.305323	205.6	0.246364
205.79	0.306609	205.79	0.246508
205.99	0.307061	205.99	0.247883
206.19	0.308994	206.19	0.246626
206.39	0.314454	206.39	0.249829
206.6	0.311286	206.6	0.246468
206.79	0.313075	206.79	0.250039
206.99	0.315136	206.99	0.251681
207.19	0.315537	207.19	0.248971
207.39	0.314803	207.39	0.253243
207.6	0.313345	207.6	0.252339
207.79	0.313969	207.79	0.251741
207.99	0.312637	207.99	0.251974
208.19	0.314773	208.19	0.250143
208.39	0.314534	208.39	0.251067
208.6	0.316257	208.6	0.250389
208.79	0.319539	208.79	0.252359
208.99	0.315468	208.99	0.255876
209.19	0.320834	209.19	0.25527
209.39	0.316433	209.39	0.253212
209.59	0.318054	209.59	0.25574
209.79	0.32063	209.79	0.25906
209.99	0.321326	209.99	0.257371
210.19	0.3202	210.19	0.25912
210.39	0.324771	210.39	0.258387
210.59	0.32475	210.59	0.259526
210.79	0.327471	210.79	0.258535
210.99	0.326499	210.99	0.260988
211.19	0.325182	211.19	0.264129
211.39	0.328957	211.39	0.263393
211.6	0.327844	211.6	0.26202
211.79	0.335829	211.79	0.266888
211.99	0.335357	211.99	0.266599
212.19	0.336427	212.19	0.262454
212.39	0.333363	212.39	0.266359
212.6	0.334039	212.6	0.264495
212.79	0.336878	212.79	0.265896
212.99	0.334207	212.99	0.266791
213.19	0.331194	213.19	0.266809
213.39	0.330523	213.39	0.266763
213.6	0.338896	213.6	0.266092
213.79	0.334366	213.79	0.265716
213.99	0.334978	213.99	0.266529
214.19	0.335163	214.19	0.26727
214.39	0.337907	214.39	0.269549
214.59	0.33723	214.59	0.271727
214.79	0.339459	214.79	0.268176
214.99	0.33821	214.99	0.270416
215.19	0.340943	215.19	0.272916
215.39	0.342266	215.39	0.273233
215.59	0.344753	215.59	0.27358
215.79	0.350802	215.79	0.273778
215.99	0.349921	215.99	0.272467
216.19	0.351498	216.19	0.274374
216.39	0.350498	216.39	0.277176
216.6	0.349383	216.6	0.273471
216.79	0.354537	216.79	0.276609
216.99	0.355236	216.99	0.278801
217.19	0.353253	217.19	0.279373
217.39	0.356411	217.39	0.279193
217.59	0.352867	217.59	0.279709
217.79	0.354601	217.79	0.280387
217.99	0.356239	217.99	0.281051
218.19	0.354252	218.19	0.281524
218.39	0.353504	218.39	0.280691
218.6	0.354001	218.6	0.283258
218.79	0.358121	218.79	0.282587
218.99	0.359596	218.99	0.280105
219.19	0.354514	219.19	0.284338
219.39	0.360045	219.39	0.282637
219.59	0.362794	219.59	0.285453
219.79	0.362877	219.79	0.28436
219.99	0.361035	219.99	0.284737
220.19	0.365726	220.19	0.286846
220.39	0.365477	220.39	0.286646
220.59	0.366303	220.59	0.286967
220.79	0.365405	220.79	0.289013
220.99	0.369527	220.99	0.291739
221.19	0.37359	221.19	0.293011
221.39	0.375192	221.39	0.291171
221.59	0.371507	221.59	0.293372
221.79	0.370966	221.79	0.292383
221.99	0.374037	221.99	0.290945
222.19	0.373781	222.19	0.290374
222.39	0.376417	222.39	0.292866
222.59	0.374197	222.59	0.293841
222.79	0.37584	222.79	0.293581
222.99	0.378029	222.99	0.292421
223.19	0.375725	223.19	0.291742
223.39	0.378138	223.39	0.295864
223.59	0.375697	223.59	0.296441
223.79	0.377093	223.79	0.293326
223.99	0.377566	223.99	0.293927
224.19	0.380493	224.19	0.29656
224.39	0.378073	224.39	0.298683
224.6	0.381286	224.6	0.297323
224.79	0.377888	224.79	0.298164
224.99	0.384638	224.99	0.299761
225.19	0.383664	225.19	0.300058
225.39	0.387161	225.39	0.299553
225.6	0.388294	225.6	0.298317
225.79	0.392028	225.79	0.30108
225.99	0.389135	225.99	0.30203
226.19	0.389038	226.19	0.308181
226.39	0.392386	226.39	0.304397
226.6	0.389998	226.6	0.308154
226.79	0.394019	226.79	0.30807
226.99	0.396225	226.99	0.304782
227.19	0.392011	227.19	0.310709
227.39	0.395486	227.39	0.305909
227.6	0.395473	227.6	0.306805
227.79	0.397923	227.79	0.308433
227.99	0.392025	227.99	0.308907
228.19	0.39668	228.19	0.307786
228.39	0.395574	228.39	0.309385
228.6	0.393217	228.6	0.307042
228.79	0.394338	228.79	0.308557
228.99	0.39426	228.99	0.31141
229.19	0.397719	229.19	0.313418
229.39	0.397364	229.39	0.313026
229.6	0.399578	229.6	0.31568
229.79	0.399966	229.79	0.312868
229.99	0.400752	229.99	0.315232
230.19	0.405489	230.19	0.316977
230.39	0.408499	230.39	0.312052
230.6	0.40601	230.6	0.317733
230.79	0.408099	230.79	0.316434
230.99	0.412972	230.99	0.318572
231.19	0.415259	231.19	0.321166
231.39	0.413392	231.39	0.319719
231.6	0.41447	231.6	0.321532
231.79	0.416684	231.79	0.319034
231.99	0.413909	231.99	0.321097
232.19	0.415788	232.19	0.320786
232.39	0.417897	232.39	0.321189
232.59	0.417027	232.59	0.321576
232.79	0.416678	232.79	0.318449
232.99	0.418808	232.99	0.321999
233.19	0.413296	233.19	0.324422
233.39	0.417147	233.39	0.323145
233.6	0.418227	233.6	0.324384
233.79	0.416585	233.79	0.321585
233.99	0.416546	233.99	0.324977
234.19	0.419969	234.19	0.326838
234.39	0.420788	234.39	0.325253
234.6	0.421425	234.6	0.325671
234.79	0.423161	234.79	0.327693
234.99	0.424143	234.99	0.328998
235.19	0.424141	235.19	0.326883
235.39	0.425241	235.39	0.33101
235.6	0.430017	235.6	0.327705
235.79	0.433581	235.79	0.330337
235.99	0.426957	235.99	0.330838
236.19	0.435842	236.19	0.335542
236.39	0.434933	236.39	0.335396
236.59	0.432948	236.59	0.334846
236.79	0.432755	236.79	0.337372
236.99	0.438995	236.99	0.334054
237.19	0.432426	237.19	0.334552
237.39	0.436156	237.39	0.339257
237.59	0.431607	237.59	0.332193
237.79	0.432916	237.79	0.336087
237.99	0.436783	237.99	0.338213
238.19	0.433376	238.19	0.334197
238.39	0.436088	238.39	0.337251
238.6	0.435447	238.6	0.335769
238.79	0.435867	238.79	0.335201
238.99	0.435923	238.99	0.334713
239.19	0.443981	239.19	0.34065
239.39	0.440162	239.39	0.342286
239.59	0.440519	239.59	0.340053
239.79	0.444234	239.79	0.339506
239.99	0.442439	239.99	0.341516
240.19	0.446967	240.19	0.34349
240.39	0.44614	240.39	0.342908
240.59	0.4486	240.59	0.34804
240.79	0.449602	240.79	0.346379
240.99	0.448211	240.99	0.344955
241.19	0.450711	241.19	0.348069
241.39	0.454677	241.39	0.344791
241.59	0.454641	241.59	0.345887
241.79	0.453898	241.79	0.349836
241.99	0.455802	241.99	0.347502
242.19	0.455806	242.19	0.347599
242.39	0.451431	242.39	0.34821
242.59	0.455461	242.59	0.349216
242.79	0.45501	242.79	0.350141
242.99	0.457155	242.99	0.346368
243.19	0.454079	243.19	0.347796
243.39	0.45508	243.39	0.351294
243.59	0.457362	243.59	0.353082
243.79	0.457622	243.79	0.355089
243.99	0.456769	243.99	0.354276
244.19	0.460747	244.19	0.353701
244.39	0.458988	244.39	0.353879
244.59	0.459573	244.59	0.355106
244.79	0.46459	244.79	0.354184
244.99	0.46286	244.99	0.353895
245.19	0.466405	245.19	0.356282
245.39	0.469253	245.39	0.356431
245.59	0.469451	245.59	0.358121
245.79	0.472399	245.79	0.360594
245.99	0.470509	245.99	0.359937
246.19	0.471339	246.19	0.357945
246.39	0.477368	246.39	0.360001
246.59	0.474456	246.59	0.359747
246.79	0.471145	246.79	0.363483
246.99	0.470801	246.99	0.362585
247.19	0.474938	247.19	0.361561
247.39	0.474691	247.39	0.363739
247.6	0.474175	247.6	0.361751
247.79	0.474557	247.79	0.361614
247.99	0.473437	247.99	0.36401
248.19	0.473362	248.19	0.36428
248.39	0.477742	248.39	0.362971
248.6	0.47611	248.6	0.365372
248.79	0.478678	248.79	0.364645
248.99	0.479805	248.99	0.363987
249.19	0.481961	249.19	0.368483
249.39	0.478995	249.39	0.366253
249.6	0.479532	249.6	0.371215
249.79	0.483269	249.79	0.369708
249.99	0.482653	249.99	0.368789
250.19	0.488217	250.19	0.371019
250.39	0.487759	250.39	0.368429
250.6	0.489717	250.6	0.371514
250.79	0.493851	250.79	0.371968
250.99	0.494545	250.99	0.374061
251.19	0.495725	251.19	0.374248
251.39	0.491803	251.39	0.373024
251.6	0.494238	251.6	0.3752
251.79	0.496287	251.79	0.378063
251.99	0.490332	251.99	0.371282
252.19	0.494522	252.19	0.373257
252.39	0.49855	252.39	0.374843
252.6	0.493217	252.6	0.374318
252.79	0.492886	252.79	0.377461
252.99	0.491783	252.99	0.380215
253.19	0.495687	253.19	0.37491
253.39	0.494573	253.39	0.376301
253.6	0.499954	253.6	0.377203
253.79	0.494118	253.79	0.381771
253.99	0.498182	253.99	0.380202
254.19	0.498623	254.19	0.377777
254.39	0.497713	254.39	0.381881
254.6	0.502886	254.6	0.383783
254.79	0.504036	254.79	0.382296
254.99	0.502372	254.99	0.382352
255.19	0.506544	255.19	0.384776
255.39	0.507531	255.39	0.38339
255.6	0.510084	255.6	0.386812
255.79	0.513294	255.79	0.387882
255.99	0.513956	255.99	0.384896
256.19	0.513084	256.19	0.38755
256.39	0.514359	256.39	0.387526
256.6	0.510897	256.6	0.388172
256.79	0.516743	256.79	0.389197
256.99	0.516426	256.99	0.391439
257.19	0.514408	257.19	0.388697
257.39	0.517255	257.39	0.390751
257.6	0.515688	257.6	0.392932
257.79	0.512984	257.79	0.391024
257.99	0.51538	257.99	0.391997
258.2	0.516736	258.2	0.390506
258.39	0.517096	258.39	0.390421
258.59	0.518107	258.59	0.390969
258.79	0.515737	258.79	0.391501
258.99	0.521072	258.99	0.392311
259.2	0.518802	259.2	0.393335
259.39	0.519402	259.39	0.39576
259.59	0.523757	259.59	0.396037
259.79	0.529591	259.79	0.397868
259.99	0.525745	259.99	0.398068
260.2	0.528225	260.2	0.396583
260.39	0.52892	260.39	0.399451
260.6	0.530348	260.6	0.400515
260.79	0.530892	260.79	0.397057
260.99	0.531402	260.99	0.402665
261.19	0.528757	261.19	0.40047
261.39	0.532582	261.39	0.403018
261.6	0.533531	261.6	0.403173
261.79	0.533738	261.79	0.402413
261.99	0.533443	261.99	0.406901
262.19	0.528847	262.19	0.401486
262.39	0.532074	262.39	0.402992
262.59	0.532289	262.59	0.402278
262.79	0.538282	262.79	0.405966
262.99	0.532121	262.99	0.402093
263.2	0.531836	263.2	0.404866
263.39	0.534532	263.39	0.408538
263.59	0.53709	263.59	0.40534
263.79	0.539175	263.79	0.405415
263.99	0.536454	263.99	0.407026
264.2	0.538484	264.2	0.410459
264.39	0.541335	264.39	0.407895
264.59	0.546119	264.59	0.411369
264.79	0.546239	264.79	0.409998
264.99	0.54308	264.99	0.414146
265.2	0.548594	265.2	0.413935
265.39	0.546887	265.39	0.412268
265.59	0.548806	265.59	0.414344
265.79	0.550618	265.79	0.415553
265.99	0.553181	265.99	0.415997
266.19	0.551134	266.19	0.412989
266.39	0.550947	266.39	0.418302
266.59	0.55207	266.59	0.41861
266.79	0.551701	266.79	0.417688
266.99	0.554382	266.99	0.41578
267.19	0.553318	267.19	0.415896
267.39	0.552138	267.39	0.419074
267.59	0.553026	267.59	0.416289
267.79	0.554217	267.79	0.418735
267.99	0.555242	267.99	0.419316
268.19	0.555129	268.19	0.418869
268.39	0.558284	268.39	0.419027
268.59	0.55964	268.59	0.418266
268.79	0.561001	268.79	0.422312
268.99	0.557379	268.99	0.422219
269.2	0.557888	269.2	0.424001
269.39	0.561984	269.39	0.424395
269.6	0.560985	269.6	0.422723
269.79	0.563727	269.79	0.42403
269.99	0.562775	269.99	0.424953
270.19	0.566746	270.19	0.426619
270.39	0.567165	270.39	0.426984
270.6	0.566096	270.6	0.429529
270.79	0.566653	270.79	0.428932
270.99	0.573085	270.99	0.427794
271.2	0.570399	271.2	0.428217
271.39	0.570498	271.39	0.431818
271.6	0.571092	271.6	0.427276
271.79	0.575005	271.79	0.428639
271.99	0.570428	271.99	0.429198
272.2	0.574737	272.2	0.430242
272.39	0.568167	272.39	0.431991
272.6	0.573972	272.6	0.430787
272.79	0.573177	272.79	0.431524
272.99	0.573422	272.99	0.431416
273.2	0.573617	273.2	0.42964
273.39	0.574268	273.39	0.432176
273.6	0.576859	273.6	0.434291
273.79	0.576654	273.79	0.431589
273.99	0.57668	273.99	0.434287
274.19	0.577592	274.19	0.434093
274.39	0.580706	274.39	0.436229
274.6	0.581188	274.6	0.436155
274.79	0.582412	274.79	0.436551
274.99	0.585378	274.99	0.439036
275.19	0.590144	275.19	0.439813
275.39	0.58852	275.39	0.438616
275.6	0.590727	275.6	0.442207
275.79	0.588474	275.79	0.439441
275.99	0.588787	275.99	0.445772
276.2	0.590101	276.2	0.443145
276.39	0.594927	276.39	0.444253
276.59	0.591799	276.59	0.440512
276.79	0.595429	276.79	0.446043
276.99	0.590842	276.99	0.443093
277.2	0.593525	277.2	0.441761
277.39	0.593745	277.39	0.44485
277.6	0.589929	277.6	0.446068
277.79	0.595678	277.79	0.442821
277.99	0.593375	277.99	0.446855
278.2	0.591738	278.2	0.446372
278.39	0.593974	278.39	0.444615
278.6	0.594841	278.6	0.446168
278.79	0.596944	278.79	0.449868
278.99	0.599813	278.99	0.446902
279.19	0.598749	279.19	0.447114
279.39	0.598467	279.39	0.448411
279.6	0.605047	279.6	0.448774
279.79	0.604897	279.79	0.451298
279.99	0.602542	279.99	0.452879
280.19	0.606467	280.19	0.455659
280.39	0.604573	280.39	0.453094
280.59	0.607723	280.59	0.454829
280.79	0.607588	280.79	0.453184
280.99	0.608661	280.99	0.452901
281.2	0.610048	281.2	0.457659
281.39	0.611365	281.39	0.455666
281.59	0.610021	281.59	0.455067
281.79	0.611255	281.79	0.458169
281.99	0.609021	281.99	0.46067
282.2	0.608487	282.2	0.457698
282.39	0.614701	282.39	0.456628
282.6	0.610077	282.6	0.459389
282.79	0.611238	282.79	0.45439
282.99	0.610358	282.99	0.45846
283.2	0.609947	283.2	0.458325
283.39	0.611305	283.39	0.46066
283.6	0.615614	283.6	0.462272
283.79	0.613076	283.79	0.456689
283.99	0.617103	283.99	0.464453
284.19	0.616539	284.19	0.462379
284.39	0.617526	284.39	0.465868
284.59	0.621246	284.59	0.466353
284.79	0.621725	284.79	0.466015
284.99	0.624458	284.99	0.46322
285.19	0.623594	285.19	0.469992
285.39	0.625711	285.39	0.465221
285.59	0.629223	285.59	0.467741
285.79	0.628488	285.79	0.468214
285.99	0.628235	285.99	0.466506
286.2	0.62976	286.2	0.469827
286.39	0.63093	286.39	0.468895
286.59	0.631631	286.59	0.471436
286.79	0.629331	286.79	0.4716
286.99	0.632451	286.99	0.469811
287.2	0.63181	287.2	0.469492
287.39	0.633249	287.39	0.472759
287.59	0.632007	287.59	0.473147
287.79	0.627418	287.79	0.475399
287.99	0.636799	287.99	0.471738
288.19	0.631258	288.19	0.473961
288.39	0.626642	288.39	0.472741
288.59	0.63318	288.59	0.476396
288.79	0.633435	288.79	0.477753
288.99	0.631237	288.99	0.475403
289.19	0.634718	289.19	0.476246
289.39	0.634448	289.39	0.478149
289.59	0.642715	289.59	0.475026
289.79	0.63868	289.79	0.480132
289.99	0.640493	289.99	0.47766
290.19	0.643477	290.19	0.481227
290.39	0.645354	290.39	0.478018
290.59	0.640778	290.59	0.48044
290.79	0.645257	290.79	0.483027
290.99	0.651749	290.99	0.48083
291.19	0.645751	291.19	0.481689
291.39	0.649164	291.39	0.486936
291.6	0.650662	291.6	0.484949
291.79	0.648058	291.79	0.48469
291.99	0.648707	291.99	0.481611
292.2	0.649844	292.2	0.484056
292.39	0.648743	292.39	0.485896
292.6	0.647114	292.6	0.487547
292.79	0.651259	292.79	0.486321
292.99	0.64528	292.99	0.48727
293.2	0.64998	293.2	0.485957
293.39	0.653655	293.39	0.486014
293.6	0.64946	293.6	0.489164
293.79	0.65033	293.79	0.493292
293.99	0.654281	293.99	0.489234
294.2	0.654005	294.2	0.487955
294.39	0.6541	294.39	0.491147
294.6	0.660168	294.6	0.49376
294.79	0.661359	294.79	0.493499
294.99	0.659538	294.99	0.490848
295.2	0.664931	295.2	0.493668
295.39	0.667713	295.39	0.495766
295.6	0.662497	295.6	0.495213
295.79	0.664466	295.79	0.493184
295.99	0.667245	295.99	0.497868
296.19	0.670479	296.19	0.500381
296.39	0.665063	296.39	0.494866
296.6	0.669653	296.6	0.498682
296.79	0.668958	296.79	0.497597
296.99	0.669028	296.99	0.498133
297.19	0.667369	297.19	0.498716
297.39	0.66857	297.39	0.495677
297.6	0.671239	297.6	0.49811
297.79	0.667507	297.79	0.500734
297.99	0.666953	297.99	0.500335
298.2	0.671933	298.2	0.4984
298.39	0.666501	298.39	0.500189
298.59	0.667652	298.59	0.498535
298.79	0.674802	298.79	0.502649
298.99	0.673736	298.99	0.502118
299.2	0.671792	299.2	0.502768
299.39	0.672292	299.39	0.504486
299.6	0.68079	299.6	0.504977
299.79	0.682661	299.79	0.506896
299.99	0.683237	299.99	0.508744
300.2	0.682872	300.2	0.508571
300.39	0.681337	300.39	0.508726
300.6	0.68732	300.6	0.507029
300.79	0.685582	300.79	0.509859
300.99	0.685886	300.99	0.506429
301.19	0.686548	301.19	0.509713
301.39	0.688876	301.39	0.509809
301.6	0.68504	301.6	0.512019
301.79	0.681866	301.79	0.512247
301.99	0.689111	301.99	0.511124
302.19	0.686129	302.19	0.509801
302.39	0.685779	302.39	0.513466
302.6	0.687205	302.6	0.510173
302.79	0.685433	302.79	0.510265
302.99	0.685818	302.99	0.514718
303.2	0.687114	303.2	0.513846
303.39	0.689661	303.39	0.514466
303.59	0.689906	303.59	0.517507
303.79	0.686415	303.79	0.519466
303.99	0.691451	303.99	0.518136
304.2	0.69464	304.2	0.517689
304.39	0.692252	304.39	0.517632
304.59	0.694996	304.59	0.517148
304.79	0.694346	304.79	0.519617
304.99	0.700309	304.99	0.519067
305.2	0.699378	305.2	0.52298
305.39	0.701288	305.39	0.523782
305.6	0.701722	305.6	0.522545
305.79	0.70329	305.79	0.523102
305.99	0.697761	305.99	0.522817
306.19	0.705245	306.19	0.524982
306.39	0.705594	306.39	0.526156
306.59	0.70548	306.59	0.5248
306.79	0.708673	306.79	0.524676
306.99	0.703255	306.99	0.52663
307.19	0.708516	307.19	0.525667
307.39	0.708488	307.39	0.525144
307.59	0.703726	307.59	0.528086
307.79	0.706232	307.79	0.526788
307.99	0.707478	307.99	0.522944
308.2	0.71013	308.2	0.532617
308.39	0.706265	308.39	0.525428
308.59	0.707693	308.59	0.53016
308.79	0.707597	308.79	0.530095
308.99	0.709428	308.99	0.531478
309.2	0.71104	309.2	0.527922
309.39	0.711229	309.39	0.533206
309.59	0.715821	309.59	0.530869
309.79	0.717132	309.79	0.531871
309.99	0.715484	309.99	0.535598
310.2	0.721104	310.2	0.532446
310.39	0.718664	310.39	0.533768
310.59	0.719678	310.59	0.534124
310.79	0.723182	310.79	0.537548
310.99	0.723123	310.99	0.533428
311.19	0.7258	311.19	0.537748
311.39	0.725063	311.39	0.535541
311.59	0.724312	311.59	0.536512
311.79	0.723804	311.79	0.537217
311.99	0.724368	311.99	0.539417
312.19	0.724616	312.19	0.538583
312.39	0.721975	312.39	0.539193
312.59	0.721683	312.59	0.540867
312.79	0.726962	312.79	0.537272
312.99	0.726505	312.99	0.541942
313.19	0.721578	313.19	0.542527
313.39	0.726727	313.39	0.539098
313.59	0.728429	313.59	0.542805
313.79	0.728672	313.79	0.541128
313.99	0.732771	313.99	0.542873
314.2	0.733773	314.2	0.544486
314.39	0.730909	314.39	0.548569
314.6	0.737408	314.6	0.546085
314.79	0.735056	314.79	0.542922
314.99	0.737963	314.99	0.547291
315.2	0.736836	315.2	0.546309
315.39	0.738638	315.39	0.548684
315.6	0.740116	315.6	0.549826
315.79	0.741941	315.79	0.550671
315.99	0.741093	315.99	0.550094
316.2	0.742561	316.2	0.549331
316.39	0.741666	316.39	0.554054
316.6	0.743484	316.6	0.550166
316.79	0.741284	316.79	0.550357
316.99	0.743924	316.99	0.550593
317.2	0.743409	317.2	0.552945
317.39	0.742096	317.39	0.553897
317.6	0.742223	317.6	0.552762
317.79	0.745935	317.79	0.553204
317.99	0.741228	317.99	0.556999
318.19	0.741079	318.19	0.55275
318.39	0.747302	318.39	0.554556
318.6	0.747959	318.6	0.552352
318.79	0.745668	318.79	0.556504
318.99	0.75088	318.99	0.555907
319.19	0.749189	319.19	0.559854
319.39	0.751471	319.39	0.560991
319.6	0.751635	319.6	0.55857
319.79	0.760926	319.79	0.558247
319.99	0.753159	319.99	0.559096
320.2	0.75869	320.2	0.564431
320.39	0.757592	320.39	0.562645
320.6	0.756017	320.6	0.561058
320.79	0.758058	320.79	0.564042
320.99	0.762398	320.99	0.560705
321.2	0.757129	321.2	0.563146
321.39	0.762106	321.39	0.563739
321.6	0.759036	321.6	0.565257
321.79	0.757038	321.79	0.564954
321.99	0.758111	321.99	0.564398
322.2	0.759751	322.2	0.566267
322.39	0.75873	322.39	0.566634
322.6	0.758984	322.6	0.563768
322.79	0.758924	322.79	0.566631
322.99	0.761612	322.99	0.567766
323.19	0.757803	323.19	0.567739
323.39	0.766914	323.39	0.570607
323.6	0.765682	323.6	0.570167
323.79	0.765663	323.79	0.56728
323.99	0.767434	323.99	0.568934
324.19	0.77027	324.19	0.574895
324.39	0.769927	324.39	0.572723
324.6	0.772115	324.6	0.573903
324.79	0.773377	324.79	0.574701
324.99	0.773751	324.99	0.574974
325.2	0.773027	325.2	0.57763
325.39	0.775899	325.39	0.574242
325.59	0.778209	325.59	0.574552
325.79	0.779382	325.79	0.575278
325.99	0.782082	325.99	0.579126
326.2	0.780855	326.2	0.574361
326.39	0.774587	326.39	0.572949
326.6	0.775744	326.6	0.575994
326.79	0.779584	326.79	0.579949
326.99	0.777301	326.99	0.576239
327.2	0.782278	327.2	0.577311
327.39	0.776757	327.39	0.577169
327.6	0.781444	327.6	0.581317
327.79	0.778951	327.79	0.578254
327.99	0.77939	327.99	0.580308
328.19	0.780265	328.19	0.58119
328.39	0.780744	328.39	0.582667
328.6	0.783366	328.6	0.581244
328.79	0.782622	328.79	0.584782
328.99	0.782903	328.99	0.58353
329.19	0.783809	329.19	0.587276
329.39	0.785848	329.39	0.585878
329.59	0.792238	329.59	0.583573
329.79	0.793674	329.79	0.58541
329.99	0.795839	329.99	0.589408
330.2	0.79265	330.2	0.587641
330.39	0.794187	330.39	0.588039
330.59	0.799953	330.59	0.589823
330.79	0.795953	330.79	0.58674
330.99	0.798651	330.99	0.590532
331.2	0.798357	331.2	0.590166
331.39	0.800196	331.39	0.590808
331.59	0.798762	331.59	0.586596
331.79	0.793922	331.79	0.588677
331.99	0.797584	331.99	0.591661
332.19	0.797162	332.19	0.591851
332.39	0.79782	332.39	0.592267
332.59	0.796595	332.59	0.593351
332.79	0.800895	332.79	0.593484
332.99	0.796862	332.99	0.593421
333.19	0.800798	333.19	0.592766
333.39	0.79928	333.39	0.596466
333.59	0.798157	333.59	0.597834
333.79	0.799891	333.79	0.596599
333.99	0.804079	333.99	0.596993
334.19	0.802755	334.19	0.598784
334.39	0.806261	334.39	0.59967
334.59	0.811417	334.59	0.59626
334.79	0.812575	334.79	0.600791
334.99	0.811929	334.99	0.601075
335.19	0.814057	335.19	0.600472
335.39	0.814252	335.39	0.600564
335.59	0.814699	335.59	0.600751
335.79	0.815429	335.79	0.602386
335.99	0.818032	335.99	0.606642
336.19	0.816779	336.19	0.603946
336.39	0.818764	336.39	0.60579
336.6	0.818664	336.6	0.606585
336.79	0.81109	336.79	0.604771
336.99	0.814066	336.99	0.604767
337.19	0.816827	337.19	0.605869
337.39	0.813383	337.39	0.604983
337.6	0.817763	337.6	0.604578
337.79	0.812935	337.79	0.607413
337.99	0.815865	337.99	0.605785
338.2	0.816895	338.2	0.607916
338.39	0.82048	338.39	0.609429
338.6	0.820201	338.6	0.610739
338.79	0.821881	338.79	0.611319
338.99	0.823008	338.99	0.611841
339.2	0.824285	339.2	0.610594
339.39	0.828382	339.39	0.612498
339.6	0.830025	339.6	0.611509
339.79	0.828592	339.79	0.616881
339.99	0.829119	339.99	0.615763
340.2	0.831812	340.2	0.618347
340.39	0.831026	340.39	0.618214
340.6	0.835938	340.6	0.617573
340.79	0.832076	340.79	0.618957
340.99	0.833688	340.99	0.615671
341.19	0.833771	341.19	0.616783
341.39	0.837659	341.39	0.616955
341.6	0.829478	341.6	0.618191
341.79	0.833341	341.79	0.617906
341.99	0.833338	341.99	0.618612
342.19	0.836797	342.19	0.618762
342.39	0.83359	342.39	0.617874
342.59	0.835429	342.59	0.617832
342.79	0.83457	342.79	0.621774
342.99	0.837249	342.99	0.620743
343.2	0.83319	343.2	0.622895
343.39	0.840618	343.39	0.622825
343.59	0.841455	343.59	0.624215
343.79	0.840125	343.79	0.62215
343.99	0.84158	343.99	0.625448
344.2	0.844572	344.2	0.627016
344.39	0.846315	344.39	0.624235
344.6	0.845172	344.6	0.625468
344.79	0.844397	344.79	0.626994
344.99	0.844918	344.99	0.624003
345.2	0.849533	345.2	0.629117
345.39	0.848129	345.39	0.627882
345.6	0.858034	345.6	0.631448
345.79	0.855056	345.79	0.632586
345.99	0.852433	345.99	0.630573
346.19	0.856219	346.19	0.62666
346.39	0.85342	346.39	0.632687
346.6	0.852414	346.6	0.628833
346.79	0.853149	346.79	0.629322
346.99	0.854063	346.99	0.628583
347.19	0.849732	347.19	0.630285
347.39	0.849732	347.39	0.632322
347.59	0.853705	347.59	0.630209
347.79	0.855925	347.79	0.633269
347.99	0.856793	347.99	0.633093
348.2	0.854014	348.2	0.635281
348.39	0.856614	348.39	0.636943
348.59	0.854396	348.59	0.636804
348.79	0.857238	348.79	0.633878
348.99	0.861644	348.99	0.636028
349.2	0.861477	349.2	0.641185
349.39	0.866725	349.39	0.639064
349.6	0.860053	349.6	0.639616
349.79	0.862347	349.79	0.635936
349.99	0.865224	349.99	0.639103
350.2	0.867832	350.2	0.642189
350.39	0.86148	350.39	0.639445
350.59	0.869758	350.59	0.641643
350.79	0.869763	350.79	0.643272
350.99	0.86939	350.99	0.64057
351.19	0.867128	351.19	0.643423
351.39	0.871158	351.39	0.641625
351.59	0.870756	351.59	0.643342
351.79	0.867762	351.79	0.643289
351.99	0.869703	351.99	0.642311
352.19	0.870079	352.19	0.641816
352.39	0.867054	352.39	0.646328
352.59	0.870357	352.59	0.64489
352.79	0.871645	352.79	0.644133
352.99	0.867602	352.99	0.647249
353.2	0.872818	353.2	0.646078
353.39	0.873228	353.39	0.647105
353.59	0.878596	353.59	0.64454
353.79	0.874303	353.79	0.650803
353.99	0.877177	353.99	0.650938
354.2	0.879618	354.2	0.649229
354.39	0.87847	354.39	0.649356
354.6	0.88299	354.6	0.650849
354.79	0.883314	354.79	0.651749
354.99	0.884451	354.99	0.651717
355.19	0.887658	355.19	0.656451
355.39	0.888811	355.39	0.655808
355.59	0.886949	355.59	0.65559
355.79	0.888055	355.79	0.654512
355.99	0.885076	355.99	0.655727
356.19	0.889417	356.19	0.65474
356.39	0.889054	356.39	0.653514
356.59	0.890351	356.59	0.658687
356.79	0.888167	356.79	0.656082
356.99	0.886457	356.99	0.657109
357.19	0.888501	357.19	0.655735
357.39	0.887453	357.39	0.657003
357.59	0.888734	357.59	0.660863
357.79	0.892455	357.79	0.659197
357.99	0.88907	357.99	0.660055
358.19	0.896087	358.19	0.662239
358.39	0.892328	358.39	0.661282
358.59	0.888686	358.59	0.661632
358.79	0.89761	358.79	0.659089
358.99	0.897279	358.99	0.665492
359.2	0.900447	359.2	0.662268
359.39	0.902582	359.39	0.664872
359.6	0.900947	359.6	0.663164
359.79	0.898543	359.79	0.665077
359.99	0.900803	359.99	0.666224
360.2	0.905865	360.2	0.666833
360.39	0.901936	360.39	0.668748
360.6	0.906874	360.6	0.669806
360.79	0.903535	360.79	0.669873
360.99	0.908283	360.99	0.66673
361.2	0.903659	361.2	0.67202
361.39	0.907133	361.39	0.67012
361.6	0.906424	361.6	0.668921
361.79	0.907562	361.79	0.666443
361.99	0.908751	361.99	0.668774
362.2	0.904332	362.2	0.669871
362.39	0.907902	362.39	0.673027
362.6	0.906989	362.6	0.670763
362.79	0.910496	362.79	0.668559
362.99	0.910797	362.99	0.671956
363.19	0.910294	363.19	0.67183
363.39	0.91084	363.39	0.675051
363.6	0.912608	363.6	0.673535
363.79	0.909932	363.79	0.674579
363.99	0.914908	363.99	0.677242
364.19	0.917796	364.19	0.67776
364.39	0.918183	364.39	0.678323
364.59	0.918772	364.59	0.676133
364.79	0.919137	364.79	0.682264
364.99	0.917631	364.99	0.676284
365.2	0.926393	365.2	0.680576
365.39	0.919254	365.39	0.682989
365.6	0.923636	365.6	0.682282
365.79	0.922341	365.79	0.678763
365.99	0.924878	365.99	0.681661
366.2	0.921166	366.2	0.682493
366.39	0.920463	366.39	0.68327
366.6	0.923606	366.6	0.682783
366.79	0.92485	366.79	0.682065
366.99	0.925041	366.99	0.682494
367.2	0.919861	367.2	0.681744
367.39	0.92673	367.39	0.681964
367.6	0.923093	367.6	0.685815
367.79	0.92432	367.79	0.684467
367.99	0.926563	367.99	0.685343
368.19	0.924531	368.19	0.685285
368.39	0.931639	368.39	0.688023
368.6	0.931049	368.6	0.688146
368.79	0.92953	368.79	0.690918
368.99	0.930498	368.99	0.68795
369.19	0.932792	369.19	0.689713
369.39	0.932708	369.39	0.693753
369.59	0.935531	369.59	0.691297
369.79	0.937417	369.79	0.688463
369.99	0.939746	369.99	0.691787
370.2	0.941051	370.2	0.693888
370.39	0.941569	370.39	0.690882
370.59	0.941409	370.59	0.692163
370.79	0.941208	370.79	0.695065
370.99	0.944915	370.99	0.69366
371.2	0.936712	371.2	0.696509
371.39	0.943406	371.39	0.693879
371.59	0.940868	371.59	0.697479
371.79	0.941431	371.79	0.694093
371.99	0.93803	371.99	0.696315
372.2	0.939081	372.2	0.695365
372.39	0.942941	372.39	0.694683
372.6	0.9398	372.6	0.699554
372.79	0.943866	372.79	0.700164
372.99	0.942176	372.99	0.699609
373.19	0.946184	373.19	0.699449
373.39	0.944643	373.39	0.704042
373.59	0.946548	373.59	0.703163
373.79	0.948926	373.79	0.705511
373.99	0.950283	373.99	0.701268
374.19	0.9489	374.19	0.701318
374.39	0.95251	374.39	0.704728
374.59	0.953453	374.59	0.702125
374.79	0.955245	374.79	0.705272
374.99	0.955373	374.99	0.700158
375.19	0.955341	375.19	0.706164
375.39	0.959136	375.39	0.705775
375.59	0.95825	375.59	0.706657
375.79	0.957793	375.79	0.702214
375.99	0.957166	375.99	0.710932
376.2	0.959375	376.2	0.706556
376.39	0.957896	376.39	0.709974
376.59	0.95843	376.59	0.709139
376.79	0.956526	376.79	0.707648
376.99	0.959772	376.99	0.710159
377.19	0.957336	377.19	0.708438
377.39	0.958986	377.39	0.709736
377.59	0.958187	377.59	0.710978
377.79	0.958427	377.79	0.711217
377.99	0.967026	377.99	0.711891
378.19	0.961307	378.19	0.71089
378.39	0.962286	378.39	0.713099
378.59	0.967104	378.59	0.71174
378.79	0.9684	378.79	0.712546
378.99	0.967664	378.99	0.714445
379.19	0.971021	379.19	0.71742
379.39	0.970319	379.39	0.716886
379.59	0.975163	379.59	0.716806
379.79	0.975418	379.79	0.716076
379.99	0.973173	379.99	0.717915
380.19	0.976762	380.19	0.718849
380.39	0.97223	380.39	0.718133
380.59	0.977049	380.59	0.717889
380.79	0.97532	380.79	0.719597
380.99	0.979275	380.99	0.719736
381.2	0.973963	381.2	0.718947
381.39	0.976823	381.39	0.719599
381.6	0.97272	381.6	0.723727
381.79	0.978246	381.79	0.719161
381.99	0.979806	381.99	0.721996
382.2	0.975767	382.2	0.722434
382.39	0.977639	382.39	0.724751
382.6	0.979898	382.6	0.722983
382.79	0.980836	382.79	0.722113
382.99	0.979954	382.99	0.724734
383.2	0.979975	383.2	0.72476
383.39	0.9842	383.39	0.724883
383.6	0.979441	383.6	0.725057
383.79	0.985258	383.79	0.728662
383.99	0.987362	383.99	0.728032
384.2	0.989519	384.2	0.726013
384.39	0.986762	384.39	0.72469
384.6	0.989263	384.6	0.730622
384.79	0.989953	384.79	0.731832
384.99	0.988741	384.99	0.733041
385.2	0.991869	385.2	0.729708
385.39	0.994088	385.39	0.731068
385.6	0.994925	385.6	0.730623
385.79	0.992719	385.79	0.731534
385.99	0.988536	385.99	0.729574
386.19	0.995569	386.19	0.734115
386.39	0.996892	386.39	0.731906
386.59	0.994074	386.59	0.732855
386.79	0.993791	386.79	0.73229
386.99	0.995311	386.99	0.734097
387.2	0.998435	387.2	0.728354
387.39	0.994512	387.39	0.736742
387.6	0.989975	387.6	0.733289
387.79	0.997077	387.79	0.735587
387.99	0.996783	387.99	0.73463
388.2	0.998012	388.2	0.738578
388.39	1.00409	388.39	0.739243
388.6	1.0015	388.6	0.741863
388.79	1.00323	388.79	0.740965
388.99	1.00219	388.99	0.741373
389.2	1.00116	389.2	0.741648
389.39	1.00526	389.39	0.74119
389.6	1.00783	389.6	0.742884
389.79	1.00936	389.79	0.741786
389.99	1.00902	389.99	0.741902
390.19	1.01036	390.19	0.742943
390.39	1.00988	390.39	0.741378
390.6	1.00917	390.6	0.745217
390.79	1.01186	390.79	0.744063
390.99	1.01157	390.99	0.744733
391.19	1.01041	391.19	0.74477
391.39	1.01072	391.39	0.745679
391.6	1.01008	391.6	0.748227
391.79	1.011	391.79	0.748919
391.99	1.005	391.99	0.744866
392.2	1.00808	392.2	0.747568
392.39	1.01469	392.39	0.745979
392.59	1.00903	392.59	0.748429
392.79	1.01388	392.79	0.75189
392.99	1.01484	392.99	0.752066
393.2	1.01406	393.2	0.748729
393.39	1.0197	393.39	0.747942
393.6	1.01801	393.6	0.752561
393.79	1.0236	393.79	0.752825
393.99	1.01706	393.99	0.755695
394.2	1.02373	394.2	0.752187
394.39	1.02436	394.39	0.752057
394.6	1.0211	394.6	0.756576
394.79	1.0239	394.79	0.753708
394.99	1.02557	394.99	0.756131
395.19	1.02248	395.19	0.756395
395.39	1.02669	395.39	0.758256
395.59	1.02798	395.59	0.756153
395.79	1.02741	395.79	0.759171
395.99	1.02757	395.99	0.758419
396.19	1.0248	396.19	0.757999
396.39	1.03321	396.39	0.762213
396.59	1.02963	396.59	0.760052
396.79	1.02783	396.79	0.756348
396.99	1.02586	396.99	0.758573
397.19	1.02696	397.19	0.758978
397.39	1.02919	397.39	0.758461
397.59	1.03093	397.59	0.761977
397.79	1.02938	397.79	0.762634
397.99	1.03351	397.99	0.764129
398.2	1.03208	398.2	0.763495
398.39	1.03318	398.39	0.764598
398.59	1.04126	398.59	0.764919
398.79	1.03593	398.79	0.764914
398.99	1.03852	398.99	0.766902
399.19	1.04256	399.19	0.766394
[truncated: 37,996 more rows]

## Sheet: rep3
2019-04-30	raw data
wt IRE1		dd IRE1
Time (s)	Displacement	Time (s)	Displacement
0	0	0	0
0.2	0.00048115	0.2	0.00064002	equilibration in reaction buffer
0.4	8.891e-05	0.4	0.00029966
0.6	0.00036723	0.6	-0.0019665
0.8	0.00029922	0.8	0.0002973
1	0.00200556	1	0.00248594
1.2	-0.00112225	1.2	0.00429663
1.39	0.00193668	1.39	-0.00308743
1.6	-6.348e-05	1.6	-0.00190291
1.79	-0.00090451	1.79	-0.00245353
2	0.00254779	2	-0.00023022
2.19	0.00161935	2.19	0.00039994
2.39	-0.00184955	2.39	-0.00077776
2.59	-0.00050882	2.59	0.00165879
2.79	-0.00034918	2.79	0.00290307
2.99	0.0007654	2.99	-0.00086626
3.19	-0.00159589	3.19	-0.00291425
3.39	-0.00030197	3.39	0.00294473
3.59	0.00377713	3.59	0.00026562
3.79	0.00208737	3.79	-0.00136336
3.99	0.0031162	3.99	-0.00120992
4.19	0.00180293	4.19	-0.0001711
4.39	0.00298925	4.39	-0.00432032
4.6	0.00042222	4.6	6.313e-05
4.8	0.00181692	4.8	-0.00356046
4.99	-0.00264129	4.99	0.00048729
5.19	0.00254209	5.19	0.00061726
5.39	0.00149097	5.39	-0.0010224
5.59	-0.00217711	5.59	-0.00074333
5.8	0.00056798	5.8	3.547e-05
5.99	-0.0013621	5.99	-0.00372737
6.19	0.00182188	6.19	-0.00050345
6.39	9.732e-05	6.39	-0.00119292
6.59	0.0005654	6.59	-0.00476442
6.79	-0.00236131	6.79	-0.00071496
6.99	-0.00139133	6.99	-0.00390909
7.19	0.00277545	7.19	-0.00116082
7.39	0.00036794	7.39	-0.002148
7.59	-0.00014264	7.59	-0.00487074
7.79	-0.00376037	7.79	-0.00260847
7.99	-0.00081994	7.99	0.00380523
8.19	-0.00148938	8.19	-0.00196405
8.39	0.00037952	8.39	0.00127887
8.59	-0.00029186	8.59	-1.081e-05
8.8	0.00080102	8.8	-2.019e-05
8.99	0.00381064	8.99	-0.00415522
9.19	-0.00353329	9.19	-0.00160806
9.39	-0.00137335	9.39	-0.00211292
9.59	0.00297834	9.59	0.00156805
9.8	0.00174346	9.8	0.00036511
9.99	-0.00035222	9.99	-0.00165411
10.19	-0.00287454	10.19	-0.00344349
10.39	0.00056868	10.39	-0.00385501
10.6	-0.00056648	10.6	-0.00271311
10.8	0.00165845	10.8	0.00157167
10.99	-0.00170764	10.99	0.0022855
11.19	0.00079985	11.19	0.00060652
11.39	0.00057591	11.39	-0.00277198
11.6	-0.00079959	11.6	-0.00382081
11.79	-0.00061774	11.79	-0.00315287
11.99	-0.00064862	11.99	-0.00195092
12.19	-0.00079056	12.19	-0.00094092
12.39	-0.00174243	12.39	-0.00459894
12.6	-0.0004713	12.6	-0.00259487
12.79	-0.0008767	12.79	-0.0030194
12.99	-0.00138763	12.99	-0.00428514
13.19	-0.0019883	13.19	-0.0028837
13.39	-0.00032641	13.39	-0.00342607
13.59	0.00090213	13.59	-0.00454858
13.8	-0.00108363	13.8	-0.0036214
13.99	-0.00143275	13.99	0.00149182
14.19	-0.00160005	14.19	-0.00104624
14.39	-0.00129307	14.39	-0.00271081
14.59	0.00382089	14.59	0.00124251
14.8	-0.00354007	14.8	-0.00440892
14.99	6.815e-05	14.99	-0.00151139
15.19	-0.00291645	15.19	-0.00211533
15.39	0.00053023	15.39	-0.00329666
15.6	0.00085514	15.6	9.503e-05
15.79	0.00133842	15.79	-0.00378729
15.99	-0.00217588	15.99	-0.00374418
16.19	-0.00159275	16.19	-0.00129058
16.39	-0.00439308	16.39	-0.00606127
16.6	0.00082672	16.6	-0.00394793
16.79	-0.00233252	16.79	-0.00264064
16.99	-0.00011692	16.99	-0.00160217
17.19	0.00033487	17.19	-0.0025226
17.39	-0.0032585	17.39	-0.00173347
17.59	0.00029378	17.59	-0.00283402
17.79	-0.00109259	17.79	-0.00378359
18	-0.00029551	18	-0.00160749
18.2	-0.00311069	18.2	-0.00691215
18.4	0.00019542	18.4	-0.00554803
18.6	0.00198603	18.6	-0.00664013
18.8	0.00028182	18.8	-0.00145445
19	-0.00265042	19	0.00114695
19.2	-0.00384252	19.2	-0.00401474
19.4	-0.00317863	19.4	-0.00149606
19.6	-0.002237	19.6	-0.00333014
19.8	0.00196745	19.8	-0.00087015
20	-0.00238433	20	-0.00299092
20.19	-0.00290894	20.19	-0.00054735
20.4	0.00079341	20.4	-0.00198531
20.59	-0.0011362	20.59	-0.00334744
20.8	0.00062456	20.8	0.00014198
21	-0.00130533	21	-0.00062419
21.2	0.0002687	21.2	-0.00356549
21.4	-0.00128831	21.4	-0.00347947
21.6	-3.107e-05	21.6	-0.004171
21.8	-0.00304816	21.8	-0.00308134
22	-0.00070726	22	-0.0014561
22.2	-0.00079823	22.2	-0.00168161
22.39	-0.0010508	22.39	-0.00065179
22.6	-0.00232772	22.6	-0.00099682
22.8	-0.00257112	22.8	-0.0032303
23	3.424e-05	23	0.00061334
23.2	-0.00401126	23.2	-0.00451132
23.39	-0.00372122	23.39	-0.00123244
23.6	-0.00119454	23.6	4.095e-05
23.79	-0.00544886	23.79	-0.0020685
24	-0.00111598	24	-0.00469552
24.19	-0.00343145	24.19	-0.00437876
24.4	-0.00209497	24.4	-0.00172985
24.6	-0.00189262	24.6	-0.00569609
24.79	0.00279723	24.79	-0.00025354
25	-0.00180748	25	-0.00312272
25.19	-0.00264666	25.19	0.00115262
25.4	-0.00038773	25.4	-0.00673371
25.59	-0.00197595	25.59	-0.00515675
25.8	-0.00311188	25.8	-0.00145945
25.99	0.00088279	25.99	-0.00481545
26.2	-0.00196978	26.2	-0.0031771
26.4	7.257e-05	26.4	-0.00924447
26.59	-0.00225706	26.59	-0.00196014
26.8	-0.00191824	26.8	-0.00514769
26.99	-0.00309412	26.99	-0.00069602
27.2	-0.00459355	27.2	-0.00206254
27.39	0.00064149	27.39	-0.00077254
27.6	-0.00242237	27.6	-0.00424692
27.8	-0.00150398	27.8	-0.00360595
28	-0.00172904	28	-0.00349403
28.19	-0.00155261	28.19	-0.0058325
28.39	-0.00536444	28.39	-0.0058983
28.6	-0.0001322	28.6	-0.00069059
28.79	-0.00288097	28.79	-0.00028028
28.99	-0.00483432	28.99	-0.00096901
29.19	-0.00243258	29.19	-0.00126368
29.4	-0.00201537	29.4	-0.00599327
29.6	-0.00751322	29.6	-0.00516767
29.79	-0.0025394	29.79	-0.00132719
29.99	-0.00357453	29.99	-0.00317688
30.19	-0.00265738	30.19	0.00089695
30.4	-0.00785427	30.4	-0.00096645
30.59	-0.00254428	30.59	-0.00369422
30.8	-0.00391677	30.8	-0.00199533
30.99	-0.00144182	30.99	-0.00563075
31.19	-0.00082629	31.19	-0.00377432
31.39	-0.00093406	31.39	-0.00478268
31.59	-0.00356056	31.59	-0.00501342
31.8	-0.00220401	31.8	-0.00553631
31.99	-0.00331182	31.99	-0.00817131
32.19	4.194e-05	32.19	-0.00301786
32.39	-0.00490041	32.39	-0.00214733
32.59	-0.00356495	32.59	-0.00410247
32.79	-0.00641844	32.79	-0.0020343
32.99	-0.00190848	32.99	-0.00398933
33.19	-0.00057819	33.19	-0.00533728
33.39	-0.00210565	33.39	-0.00551308
33.59	-0.00247007	33.59	-0.00429974
33.79	-0.00178101	33.79	-0.00188304
33.99	-0.0035404	33.99	-0.00338619
34.19	-0.00338356	34.19	-0.00389439
34.4	-0.00252278	34.4	-0.00404345
34.59	0.00158908	34.59	0.0003989
34.79	-0.00170111	34.79	0.00057975
34.99	-0.00137036	34.99	-0.00563472
35.19	0.00176341	35.19	-0.00589673
35.39	-7.839e-05	35.39	-0.00460025
35.59	-0.00170302	35.59	-0.002719
35.79	-0.0045118	35.79	-0.00501789
35.99	-0.00264476	35.99	-0.00186016
36.19	-0.00264736	36.19	-0.00279154
36.39	-0.00291724	36.39	-0.00168627
36.59	-0.00356399	36.59	-0.00564992
36.79	0.00125769	36.79	-0.00732248
36.99	-0.00439229	36.99	-0.00163321
37.19	-0.0051286	37.19	-0.00547446
37.39	-0.00158182	37.39	-0.00394849
37.59	-0.00167286	37.59	-0.00615608
37.79	-0.00506505	37.79	-0.00749483
37.99	-0.00188423	37.99	-0.00512153
38.19	-0.00551106	38.19	-0.00382249
38.4	-0.00418267	38.4	-0.00609579
38.59	-0.00468524	38.59	-0.00623393
38.79	0.00159707	38.79	-0.00485522
38.99	-0.0033086	38.99	-0.0086383
39.19	-0.00058746	39.19	-0.00654351
39.4	-0.00484482	39.4	-0.00652322
39.59	-0.00112625	39.59	-0.00972601
39.79	-0.00333797	39.79	-0.00624056
39.99	-0.00550416	39.99	-0.00461265
40.19	0.00082063	40.19	-0.00392078
40.39	-0.00165862	40.39	-0.00210516
40.59	-0.00310514	40.59	-0.00126514
40.79	-0.00047605	40.79	-0.00377728
40.99	-0.00115255	40.99	-0.00657466
41.19	-0.00261844	41.19	-0.00576396
41.4	-0.00213496	41.4	-0.00302729
41.59	-0.00455579	41.59	-0.0063576
41.79	-0.00595316	41.79	-0.00696444
41.99	-0.00169639	41.99	-0.00593541
42.19	-0.00545697	42.19	-0.00095514
42.4	-0.00518958	42.4	-0.00672338
42.59	-0.00214999	42.59	-0.00079501
42.79	-0.00387798	42.79	-0.00517835
42.99	-0.00266925	42.99	-0.00677555
43.19	-0.00273962	43.19	-0.00448146
43.4	-0.00335835	43.4	-0.00495888
43.59	-0.0051601	43.59	-0.00230216
43.79	-0.00282443	43.79	-0.00685523
43.99	-0.00131141	43.99	-0.00267275
44.19	0.00059306	44.19	-0.00271937
44.4	0.00015933	44.4	-0.00822336
44.59	-0.00241819	44.59	-0.00982427
44.79	-0.00214105	44.79	-0.00658275
44.99	-0.0035981	44.99	-0.00400912
45.19	-0.00396584	45.19	-0.00128966
45.39	-0.00405212	45.39	-0.00465313
45.59	-0.0036716	45.59	-0.00483047
45.79	-0.00258695	45.79	-0.00404614
45.99	-0.00116375	45.99	-0.00425844
46.19	0.00168051	46.19	-0.00416442
46.4	-0.00052245	46.4	-0.00672192
46.59	-0.00297973	46.59	-0.00696123
46.79	-0.0011604	46.79	-0.00286226
46.99	-0.00361021	46.99	-0.00534584
47.19	-0.00074082	47.19	-0.00900501
47.4	-0.00159485	47.4	0.00074599
47.59	-0.00197295	47.59	-0.00243192
47.79	-0.001916	47.79	-0.00366445
47.99	-0.00409182	47.99	-0.00627109
48.19	-0.00197949	48.19	-0.00522299
48.4	-0.00339085	48.4	-0.00453204
48.59	-0.00120922	48.59	-0.00876083
48.79	-0.0016441	48.79	-0.00163866
48.99	-0.00284963	48.99	-0.00347361
49.19	-0.00187818	49.19	-0.00384574
49.39	-0.00097152	49.39	-0.00257972
49.59	4.49e-05	49.59	-0.00165077
49.79	-0.00644435	49.79	-0.00975281
49.99	-0.00776391	49.99	-0.00374089
50.19	-0.00421701	50.19	-0.00841349
50.39	-0.00544789	50.39	-0.00474201
50.59	-0.0068072	50.59	-0.00684247
50.79	-0.00306949	50.79	-0.00652696
50.99	-0.00153599	50.99	-0.00422036
51.19	-0.00134318	51.19	-0.00501344
51.39	-0.00318671	51.39	-0.00765442
51.59	-0.00149079	51.59	-0.00835257
51.79	-0.00013346	51.79	-0.00521001
51.99	0.00092494	51.99	-0.00492247
52.19	-0.00454562	52.19	-0.00481785
52.4	-0.00044731	52.4	-0.00651142
52.59	-0.00126529	52.59	-0.00347357
52.79	-0.00163126	52.79	-0.00608872
52.99	-0.00465738	52.99	-0.00879845
53.19	-0.00546696	53.19	-0.00954715
53.39	-0.00306761	53.39	-0.00666378
53.59	-0.00360856	53.59	-0.00390264
53.79	-0.0041916	53.79	-0.00516954
53.99	-0.00425484	53.99	-0.00288501
54.19	-0.00403223	54.19	-0.00459092
54.39	-0.00118838	54.39	-0.00685749
54.59	-0.00473179	54.59	-0.00178185
54.79	-0.00495983	54.79	-0.00590104
54.99	-0.0038558	54.99	-0.00491345
55.19	-0.00754306	55.19	-0.00751001
55.39	-0.00483743	55.39	-0.00842267
55.59	-0.00462329	55.59	-0.00417915
55.79	-0.00531751	55.79	-0.00587287
55.99	-0.00665603	55.99	-0.00721217
56.19	-0.00426687	56.19	-0.00540838
56.4	-0.00259358	56.4	-0.00460512
56.59	-0.00720948	56.59	-0.00437575
56.79	-0.0033735	56.79	-0.0069633
56.99	-0.00466459	56.99	-0.00440835
57.19	-0.00239225	57.19	-0.00365506
57.4	-0.00099635	57.4	-0.00684881
57.59	-0.001413	57.59	-0.00397392
57.79	-0.00082139	57.79	-0.00852248
57.99	-0.00502091	57.99	-0.00526272
58.19	-0.00442877	58.19	-0.00930004
58.39	-0.0052343	58.39	-0.00537248
58.59	-0.00875061	58.59	-0.00475444
58.79	-0.00632233	58.79	-0.0113325
58.99	-0.00455316	58.99	-0.00616964
59.19	-0.00218698	59.19	-0.00619721
59.4	-0.00354123	59.4	-0.00472444
59.59	-0.00633348	59.59	-0.00630319
59.79	-0.00175359	59.79	-0.00436134
59.99	-0.00542722	59.99	-0.00471308
60.19	-0.0038876	60.19	-0.0017905
60.4	-0.0102706	60.4	-0.00582759
60.59	-0.00505593	60.59	-0.00349757
60.79	-0.00605422	60.79	-0.0070927
60.99	-0.00291044	60.99	-0.00448492
61.19	-0.00832055	61.19	-0.00662568
61.39	-0.00783191	61.39	-0.00620147
61.59	-0.00465291	61.59	-0.00682693
61.79	-0.00510375	61.79	-0.00354573
61.99	-0.00533681	61.99	-0.00532143
62.19	-0.00470657	62.19	-0.00613201
62.39	-0.00644166	62.39	-0.00808066
62.59	-0.00247305	62.59	-0.00996124
62.79	-0.00294508	62.79	-0.0068419
62.99	-0.00258713	62.99	-0.00910487
63.19	-0.00299701	63.19	-0.00430582
63.4	-0.00590718	63.4	-0.00540371
63.59	-0.00453204	63.59	-0.00468256
63.79	-0.0060376	63.79	-0.00414346
63.99	-0.00343851	63.99	-0.0003439
64.19	-0.00517868	64.19	-0.00573866
64.4	-0.00314152	64.4	-0.00549509
64.6	0.00099833	64.6	-0.00924387
64.8	-0.00414521	64.8	-0.00621192
64.99	-0.00680562	64.99	-0.00520818
65.19	-0.0061944	65.19	-0.00463133
65.4	-0.0030075	65.4	-0.00996957
65.59	-0.0059252	65.59	-0.00920515
65.8	-0.00518954	65.8	-0.00550844
66	-0.00501453	66	-0.00428473
66.19	-0.00312007	66.19	-0.00510779
66.39	-0.00815305	66.39	-0.0042555
66.59	-0.00439978	66.59	-0.00556643
66.8	-0.00273579	66.8	-0.00772709
66.99	-0.00453791	66.99	-0.00643912
67.19	-0.00216238	67.19	-0.00640766
67.39	-0.00800711	67.39	-0.0053042
67.6	-0.00407025	67.6	-0.00406093
67.79	-0.00531275	67.79	-0.00772405
67.99	-0.00469612	67.99	-0.00484804
68.19	-0.00841111	68.19	-0.00599729
68.4	-0.00236157	68.4	-0.00492434
68.6	-0.0043277	68.6	-0.00288537
68.79	-0.00405873	68.79	-0.0071881
69	-0.00844738	69	-0.00662274
69.19	-0.00557377	69.19	-0.00638584
69.4	-0.00305034	69.4	-0.00745258
69.6	-0.00146647	69.6	-0.00968342
69.79	-0.00490879	69.79	-0.00538265
69.99	-0.00420426	69.99	-0.00647475
70.19	-0.00390783	70.19	-0.00445147
70.4	-0.00642348	70.4	-0.00671876
70.59	-0.00786907	70.59	-0.00862672
70.8	-0.00228911	70.8	-0.00549407
70.99	-0.0048805	70.99	-0.0090441
71.19	-0.00174733	71.19	-0.00545852
71.39	-0.00522852	71.39	-0.0113825
71.59	-0.00497596	71.59	-0.0082586
71.79	-0.00587378	71.79	-0.00779339
71.99	-0.0034552	71.99	-0.00734467
72.19	-0.00412264	72.19	-0.00991596
72.39	-0.00677941	72.39	-0.00514919
72.59	-0.00520541	72.59	-0.00915616
72.79	-0.00426095	72.79	-0.00423371
72.99	-0.0043558	72.99	-0.00250093
73.19	-0.00611369	73.19	-0.00493552
73.39	-0.00433268	73.39	-0.00638933
73.59	-0.00785952	73.59	-0.00957011
73.79	-0.00765567	73.79	-0.00871462
73.99	-0.00732644	73.99	-0.00750107
74.19	-0.00477988	74.19	-0.00543779
74.39	-0.00768853	74.39	-0.00584976
74.59	-0.00407851	74.59	-0.00567925
74.79	-0.00047719	74.79	-0.00648418
74.99	-0.0040065	74.99	-0.00491873
75.19	-0.0056926	75.19	-0.00580418
75.39	-0.00622432	75.39	-0.0102469
75.59	-0.00580642	75.59	-0.00695732
75.79	-0.00420188	75.79	-0.00782821
76	-0.00414048	76	-0.0064826
76.19	-0.00366275	76.19	-0.00792003
76.39	-0.00468528	76.39	-0.00519351
76.59	-0.00534394	76.59	-0.00986829
76.8	-0.0071059	76.8	-0.00693481
77	-0.00762356	77	-0.00904121
77.19	-0.0066007	77.19	-0.00307752
77.4	-0.010877	77.4	-0.00887843
77.6	-0.0045699	77.6	-0.00469884
77.8	-0.0041181	77.8	-0.0088114
78	-0.00341714	78	-0.00327905
78.19	-0.00761887	78.19	-0.00740728
78.4	-0.00546681	78.4	-0.00725177
78.6	-0.00435586	78.6	-0.00687704
78.8	-0.00591211	78.8	-0.00806237
79	-0.00949746	79	-0.00824184
79.19	-0.00552102	79.19	-0.0112879
79.4	-0.00536438	79.4	-0.00858403
79.6	-0.00707809	79.6	-0.00582667
79.8	-0.00354612	79.8	-0.00790246
80	-0.00714201	80	-0.00630311
80.19	-0.00807375	80.19	-0.0103039
80.39	-0.00646474	80.39	-0.00599201
80.6	-0.00837907	80.6	-0.00543888
80.8	-0.00729481	80.8	-0.00971462
81	-0.00344128	81	-0.00746076
81.19	-0.00312954	81.19	-0.00896661
81.4	-0.00390246	81.4	-0.011948
81.6	-0.00180041	81.6	-0.00815494
81.8	-0.00562585	81.8	-0.0077026
82	-0.00924266	82	-0.0108178
82.19	-0.00662406	82.19	-0.00929716
82.4	-0.00498691	82.4	-0.00747653
82.59	-0.00543146	82.59	-0.00943114
82.8	-0.00775574	82.8	-0.0118998
82.99	-0.00397458	82.99	-0.00729843
83.19	-0.00534268	83.19	-0.00994475
83.4	-0.00441944	83.4	-0.00563148
83.6	-0.00718453	83.6	-0.0108175
83.8	-0.00803668	83.8	-0.0101409
84	-0.0056714	84	-0.00907265
84.19	-0.00397101	84.19	-0.00746844
84.39	-0.00491088	84.39	-0.0117033
84.6	-0.0101763	84.6	-0.00856805
84.79	-0.00344602	84.79	-0.0101626
85	-0.00632245	85	-0.00907519
85.19	-0.00441763	85.19	-0.0127727
85.39	-0.00504232	85.39	-0.00778931
85.6	-0.00543909	85.6	-0.00843194
85.8	-0.00599328	85.8	-0.00839926
86	-0.0062116	86	-0.00746318
86.19	-0.00669184	86.19	-0.00822749
86.4	-0.00511545	86.4	-0.00921754
86.59	-0.00736969	86.59	-0.0103
86.8	-0.00563812	86.8	-0.00703206
86.99	-0.00763271	86.99	-0.0132633
87.19	-0.00715645	87.19	-0.00843884
87.4	-0.00751412	87.4	-0.0108891
87.59	-0.00700676	87.59	-0.0080525
87.79	-0.00862137	87.79	-0.0102593
87.99	-0.00354167	87.99	-0.00801956
88.19	-0.00483107	88.19	-0.0101292
88.39	-0.00736145	88.39	-0.00975622
88.6	-0.00453888	88.6	-0.0108173
88.79	-0.00862007	88.79	-0.0103159
89	-0.00848836	89	-0.00603381
89.19	-0.00718701	89.19	-0.0105157
89.39	-0.00758606	89.39	-0.00905518
89.59	-0.00638462	89.59	-0.00907625
89.79	-0.00436145	89.79	-0.00863846
90	-0.00428733	90	-0.0121196
90.19	-0.00724757	90.19	-0.00707559
90.39	-0.00605149	90.39	-0.00943601
90.59	-0.00583639	90.59	-0.00763792
90.8	-0.00612121	90.8	-0.00658898
90.99	-0.00468546	90.99	-0.00962741
91.19	-0.00642856	91.19	-0.0102581
91.4	-0.00505789	91.4	-0.010168
91.59	-0.00777316	91.59	-0.00969723
91.79	-0.00606507	91.79	-0.0108366
91.99	-0.010528	91.99	-0.0121143
92.19	-0.0077448	92.19	-0.011758
92.39	-0.00881421	92.39	-0.00945367
92.59	-0.00670455	92.59	-0.010409
92.79	-0.00587461	92.79	-0.00806451
92.99	-0.00626678	92.99	-0.00854362
93.19	-0.00795012	93.19	-0.0104231
93.39	-0.00641581	93.39	-0.00850683
93.59	-0.0121595	93.59	-0.00667283
93.79	-0.00523158	93.79	-0.00976926
93.99	-0.00570691	93.99	-0.00812388
94.19	-0.00712591	94.19	-0.00954132
94.39	-0.00656774	94.39	-0.00896862
94.59	-0.00626177	94.59	-0.00885005
94.79	-0.004292	94.79	-0.0119627
94.99	-0.00487188	94.99	-0.0108316
95.19	-0.00591872	95.19	-0.0092169
95.39	-0.00749897	95.39	-0.00977974
95.59	-0.00585309	95.59	-0.0102
95.79	-0.00640993	95.79	-0.0101234
95.99	-0.00870825	95.99	-0.0124098
96.19	-0.00700818	96.19	-0.00743847
96.4	-0.00338023	96.4	-0.0115043
96.6	-0.00615654	96.6	-0.0106031
96.8	-0.0078736	96.8	-0.00851316
97	-0.00383886	97	-0.00737118
97.19	-0.00355016	97.19	-0.00886711
97.4	-0.00587663	97.4	-0.00668419
97.6	-0.00848786	97.6	-0.0055565
97.8	-0.0051625	97.8	-0.0105974
98	-0.00780293	98	-0.00935017
98.19	-0.00638771	98.19	-0.00894837
98.4	-0.00572583	98.4	-0.00577864
98.6	-0.00926331	98.6	-0.00845692
98.8	-0.0082481	98.8	-0.00608451
99	-0.00405048	99	-0.00720789
99.19	-0.0102325	99.19	-0.0136874
99.4	-0.00573726	99.4	-0.00923493
99.6	-0.00910361	99.6	-0.00763464
99.8	-0.00504501	99.8	-0.0107802
99.99	-0.00649752	99.99	-0.0117598
100.19	-0.00953479	100.19	-0.00821098
100.39	-0.00756756	100.39	-0.00858989
100.6	-0.00581109	100.6	-0.00690227
100.8	-0.00290873	100.8	-0.0103497
100.99	-0.00956369	100.99	-0.00884054
101.19	-0.0024327	101.19	-0.00861452
101.4	-0.00830256	101.4	-0.0113802
101.6	-0.00491279	101.6	-0.00888641
101.79	-0.00929184	101.79	-0.00919349
102	-0.00803628	102	-0.0117815
102.19	-0.0101849	102.19	-0.00989708
102.4	-0.00392241	102.4	-0.00526417
102.6	-0.00550163	102.6	-0.00700079
102.8	-0.00720107	102.8	-0.0139403
103	-0.00670451	103	-0.00947628
103.19	-0.0094267	103.19	-0.00736388
103.4	-0.00773544	103.4	-0.0121007
103.6	-0.00706765	103.6	-0.0108008
103.8	-0.011037	103.8	-0.00716606
104	-0.00661479	104	-0.00872517
104.19	-0.00732869	104.19	-0.00923121
104.4	-0.00638061	104.4	-0.0112106
104.6	-0.0100287	104.6	-0.00993713
104.8	-0.00556978	104.8	-0.00952134
104.99	-0.0076099	104.99	-0.0103427
105.19	-0.00817438	105.19	-0.00795677
105.4	-0.00444664	105.4	-0.0110032
105.6	-0.00719888	105.6	-0.00881472
105.79	-0.00501223	105.79	-0.0095604
106	-0.00564211	106	-0.00665153
106.19	-0.00592977	106.19	-0.00932498
106.39	-0.00564017	106.39	-0.00995035
106.59	-0.00812932	106.59	-0.0109365
106.79	-0.00999583	106.79	-0.00945156
107	-0.00210903	107	-0.00934447
107.19	-0.00984385	107.19	-0.00778368
107.39	-0.00761117	107.39	-0.012661
107.59	-0.010661	107.59	-0.00744672
107.8	-0.00844004	107.8	-0.00940245
108	-0.012075	108	-0.00728182
108.19	-0.00521034	108.19	-0.0102262
108.4	-0.0110516	108.4	-0.00754163
108.59	-0.0102941	108.59	-0.00457832
108.8	-0.00997491	108.8	-0.0105823
108.99	-0.00757892	108.99	-0.0108639
109.19	-0.00981665	109.19	-0.00901991
109.39	-0.00863273	109.39	-0.0119284
109.6	-0.00473853	109.6	-0.00694623
109.8	-0.00971641	109.8	-0.0080134
109.99	-0.00549236	109.99	-0.0118115
110.19	-0.0065485	110.19	-0.010975
110.39	-0.00554418	110.39	-0.00961822
110.59	-0.00555438	110.59	-0.00856683
110.79	-0.00618683	110.79	-0.00990403
110.99	-0.00861716	110.99	-0.0101377
111.19	-0.00693959	111.19	-0.00908063
111.39	-0.0094034	111.39	-0.0111088
111.59	-0.00810219	111.59	-0.0112009
111.79	-0.00354211	111.79	-0.00943686
112	-0.00622392	112	-0.0130114
112.19	-0.0090479	112.19	-0.0106822
112.39	-0.00694924	112.39	-0.00869099
112.59	-0.00780084	112.59	-0.00818473
112.79	-0.00957314	112.79	-0.00819672
112.99	-0.00752761	112.99	-0.00900148
113.19	-0.0056901	113.19	-0.0123306
113.39	-0.0128408	113.39	-0.00678263
113.59	-0.00838005	113.59	-0.0111941
113.8	-0.0092703	113.8	-0.0110145
113.99	-0.00374994	113.99	-0.00986665
114.19	-0.00348411	114.19	-0.01051
114.39	-0.00681315	114.39	-0.00966969
114.59	-0.00945418	114.59	-0.00925183
114.79	-0.00809217	114.79	-0.0128806
114.99	-0.0092558	114.99	-0.00893007
115.19	-0.00743045	115.19	-0.0114435
115.39	-0.00664305	115.39	-0.00721385
115.59	-0.0081967	115.59	-0.00927787
115.8	-0.00853897	115.8	-0.00811667
116	-0.00623912	116	-0.0123826
116.19	-0.00594897	116.19	-0.00895847
116.4	-0.0123966	116.4	-0.0067162
116.6	-0.0113197	116.6	-0.0119872
116.8	-0.00933941	116.8	-0.0103942
117	-0.00806111	117	-0.0108489
117.19	-0.0112029	117.19	-0.0109827
117.4	-0.010286	117.4	-0.0125457
117.6	-0.00608385	117.6	-0.0138625
117.79	-0.00860501	117.79	-0.00943312
118	-0.00856105	118	-0.00701489
118.19	-0.00577884	118.19	-0.012204
118.4	-0.0109805	118.4	-0.013854
118.6	-0.00558586	118.6	-0.0111935
118.8	-0.00804208	118.8	-0.00984155
119	-0.00676428	119	-0.0075066
119.19	-0.00855704	119.19	-0.0146707
119.4	-0.00856981	119.4	-0.00906672
119.6	-0.00721009	119.6	-0.00536938
119.79	-0.0103186	119.79	-0.0117376
120	-0.00796347	120	-0.0125674
120.19	-0.00493263	120.19	-0.0120591
120.4	-0.0106774	120.4	-0.010414
120.6	-0.00712813	120.6	-0.0126854
120.8	-0.0073388	120.8	-0.0118823
121	-0.0133413	121	-0.0142272
121.19	-0.00768082	121.19	-0.0135079
121.39	-0.00788881	121.39	-0.00913603
121.6	-0.00809791	121.6	-0.00910219
121.8	-0.00449123	121.8	-0.011019
121.99	-0.00649638	121.99	-0.0118874
122.19	-0.0093653	122.19	-0.010754
122.39	-0.0088623	122.39	-0.00981245
122.6	-0.00947443	122.6	-0.0142064
122.79	-0.0114107	122.79	-0.00887044
123	-0.00835508	123	-0.010034
123.19	-0.00817819	123.19	-0.0111868
123.4	-0.0109994	123.4	-0.011875
123.6	-0.00970903	123.6	-0.00910583
123.79	-0.00709806	123.79	-0.0123934
124	-0.00784773	124	-0.0153675
124.19	-0.010134	124.19	-0.00987317
124.4	-0.00789774	124.4	-0.0121576
124.59	-0.00770876	124.59	-0.0152264
124.8	-0.0091935	124.8	-0.00995688
125	-0.00531003	125	-0.0109256
125.19	-0.00900903	125.19	-0.0142752
125.4	-0.00980527	125.4	-0.0137871
125.59	-0.0106602	125.59	-0.0122077
125.8	-0.00944987	125.8	-0.0123779
126	-0.00919823	126	-0.0145591
126.19	-0.0128442	126.19	-0.0101567
126.39	-0.0095041	126.39	-0.00969599
126.6	-0.0105731	126.6	-0.0108655
126.8	-0.0036945	126.8	-0.0134864
126.99	-0.00765121	126.99	-0.0127671
127.19	-0.0106789	127.19	-0.0117975
127.39	-0.00883081	127.39	-0.0145476
127.6	-0.00798555	127.6	-0.0105073
127.79	-0.00745797	127.79	-0.0140134
127.99	-0.0105442	127.99	-0.0147354
128.19	-0.0100461	128.19	-0.0132193
128.39	-0.0114702	128.39	-0.0158486
128.6	-0.00951492	128.6	-0.00811361
128.79	-0.00817604	128.79	-0.00982021
128.99	-0.0123963	128.99	-0.015257
129.19	-0.00975291	129.19	-0.00713732
129.39	-0.0111533	129.39	-0.0115126
129.59	-0.0105592	129.59	-0.0129018
129.79	-0.0046224	129.79	-0.0135834
129.99	-0.0101648	129.99	-0.0141484
130.19	-0.011737	130.19	-0.0116767
130.39	-0.00826437	130.39	-0.0101832
130.59	-0.00927081	130.59	-0.010208
130.79	-0.0104006	130.79	-0.0125708
130.99	-0.0106909	130.99	-0.0142505
131.19	-0.00745988	131.19	-0.0106262
131.39	-0.00822443	131.39	-0.0162734
131.6	-0.0125279	131.6	-0.0132988
131.79	-0.00735907	131.79	-0.0114579
131.99	-0.00828903	131.99	-0.0143047
132.19	-0.00731106	132.19	-0.0133947
132.39	-0.00922928	132.39	-0.0171128
132.6	-0.0135659	132.6	-0.0131042
132.79	-0.00916506	132.79	-0.0115136
132.99	-0.00704256	132.99	-0.0152103
133.19	-0.0056725	133.19	-0.0102709
133.39	-0.00995301	133.39	-0.0114853
133.59	-0.00925162	133.59	-0.0144433
133.79	-0.00834197	133.79	-0.0133362
133.99	-0.00784141	133.99	-0.0131845
134.19	-0.0100947	134.19	-0.0145477
134.39	-0.0100135	134.39	-0.0111568
134.59	-0.00847336	134.59	-0.00946477
134.79	-0.00704836	134.79	-0.0148528
134.99	-0.00927437	134.99	-0.0130237
135.19	-0.00955364	135.19	-0.0119222
135.39	-0.00984821	135.39	-0.0147429
135.6	-0.0142032	135.6	-0.0140782
135.79	-0.0102594	135.79	-0.0127927
135.99	-0.0104861	135.99	-0.0123313
136.19	-0.00858978	136.19	-0.0111362
136.39	-0.010659	136.39	-0.0113669
136.6	-0.00675106	136.6	-0.00812884
136.79	-0.00960646	136.79	-0.0127472
136.99	-0.0110695	136.99	-0.013791
137.19	-0.00910172	137.19	-0.0128258
137.39	-0.0078104	137.39	-0.0147838
137.6	-0.0116261	137.6	-0.0116952
137.79	-0.0078594	137.79	-0.00992461
137.99	-0.0117832	137.99	-0.0136619
138.19	-0.0112163	138.19	-0.00831831
138.39	-0.0139452	138.39	-0.0139983
138.6	-0.00906663	138.6	-0.0103604
138.79	-0.0127735	138.79	-0.0141512
138.99	-0.0119803	138.99	-0.0126831
139.19	-0.0140254	139.19	-0.0116661
139.39	-0.00790562	139.39	-0.0137278
139.6	-0.0115228	139.6	-0.0124511
139.79	-0.0124531	139.79	-0.0105159
139.99	-0.0115197	139.99	-0.0117725
140.19	-0.0114763	140.19	-0.0103494
140.39	-0.0101578	140.39	-0.0153787
140.6	-0.0137607	140.6	-0.01042
140.79	-0.0112753	140.79	-0.0124183
140.99	-0.0109531	140.99	-0.0148507
141.19	-0.0130363	141.19	-0.0147952
141.39	-0.0125894	141.39	-0.0121402
141.59	-0.00955427	141.59	-0.012188
141.79	-0.00996747	141.79	-0.0107501
141.99	-0.0116055	141.99	-0.0143733
142.19	-0.0117587	142.19	-0.0139266
142.39	-0.0123502	142.39	-0.017849
142.59	-0.0142155	142.59	-0.0112943
142.79	-0.0133629	142.79	-0.00992606
142.99	-0.0115605	142.99	-0.0150777
143.19	-0.0108093	143.19	-0.0115013
143.39	-0.0112404	143.39	-0.0106733
143.6	-0.0109165	143.6	-0.0163668
143.79	-0.00956657	143.79	-0.00965581
143.99	-0.0118703	143.99	-0.0151197
144.19	-0.0140423	144.19	-0.0090128
144.39	-0.00956128	144.39	-0.0133767
144.6	-0.00976604	144.6	-0.0123535
144.79	-0.00877184	144.79	-0.0131363
144.99	-0.0113595	144.99	-0.00970677
145.19	-0.00735682	145.19	-0.013952
145.39	-0.009411	145.39	-0.0118909
145.6	-0.012692	145.6	-0.0111884
145.79	-0.0110294	145.79	-0.0109917
145.99	-0.0109237	145.99	-0.0107497
146.19	-0.00909781	146.19	-0.0163203
146.39	-0.0113973	146.39	-0.0108529
146.59	-0.0109413	146.59	-0.0151069
146.79	-0.00853405	146.79	-0.0113625
146.99	-0.00897792	146.99	-0.0136714
147.19	-0.00851256	147.19	-0.015796
147.39	-0.00855413	147.39	-0.0131072
147.59	-0.0142064	147.59	-0.0144251
147.79	-0.00941518	147.79	-0.0128367
147.99	-0.012564	147.99	-0.0154803
148.19	-0.0125576	148.19	-0.00935445
148.39	-0.00954754	148.39	-0.0123258
148.59	-0.0106893	148.59	-0.0123842
148.79	-0.00984365	148.79	-0.0151867
148.99	-0.00886526	148.99	-0.0141868
149.19	-0.0115201	149.19	-0.0081387
149.39	-0.00915424	149.39	-0.0170248
149.6	-0.0110723	149.6	-0.0108267
149.79	-0.0135187	149.79	-0.0154083
149.99	-0.0101484	149.99	-0.0117984
150.19	-0.0127909	150.19	-0.0140051
150.39	-0.0131959	150.39	-0.0140612
150.6	-0.0116919	150.6	-0.0162651
150.79	-0.0133225	150.79	-0.0132311
150.99	-0.00684886	150.99	-0.0111951
151.19	-0.0131054	151.19	-0.0138173
151.39	-0.0104353	151.39	-0.0178769
151.59	-0.00943559	151.59	-0.0161164
151.79	-0.00975093	151.79	-0.0123377
151.99	-0.0108823	151.99	-0.0152548
152.19	-0.00622135	152.19	-0.00789888
152.39	-0.00760382	152.39	-0.0141269
152.59	-0.0115314	152.59	-0.0129473
152.79	-0.00933229	152.79	-0.0121379
152.99	-0.0129321	152.99	-0.012828
153.19	-0.00820377	153.19	-0.0135209
153.39	-0.00978848	153.39	-0.0152382
153.59	-0.0102147	153.59	-0.0183567
153.79	-0.00937976	153.79	-0.014872
153.99	-0.0106772	153.99	-0.0149315
154.19	-0.0132469	154.19	-0.0129447
154.39	-0.014143	154.39	-0.0160216
154.59	-0.0112417	154.59	-0.0137607
154.79	-0.0115238	154.79	-0.0131713
154.99	-0.0104325	154.99	-0.0158054
155.19	-0.0134474	155.19	-0.0124468
155.39	-0.0112484	155.39	-0.0119732
155.6	-0.0114185	155.6	-0.0107493
155.79	-0.00657253	155.79	-0.0146462
155.99	-0.0118449	155.99	-0.0161163
156.19	-0.0115674	156.19	-0.0163516
156.39	-0.00786538	156.39	-0.0165893
156.6	-0.0108999	156.6	-0.0153701
156.79	-0.0103725	156.79	-0.0141092
156.99	-0.0137215	156.99	-0.0127354
157.19	-0.011132	157.19	-0.0135082
157.39	-0.0159887	157.39	-0.0125651
157.6	-0.00902073	157.6	-0.014534
157.79	-0.0114966	157.79	-0.0126051
157.99	-0.012866	157.99	-0.0122187
158.19	-0.00723793	158.19	-0.0182495
158.39	-0.0123836	158.39	-0.0179056
158.6	-0.0118913	158.6	-0.0150882
158.79	-0.0109859	158.79	-0.0133776
158.99	-0.0103143	158.99	-0.00996555
159.19	-0.0138503	159.19	-0.016381
159.39	-0.012182	159.39	-0.0101099
159.59	-0.0123904	159.59	-0.0160018
159.79	-0.0126263	159.79	-0.0119407
159.99	-0.0115091	159.99	-0.0144804
160.19	-0.0107455	160.19	-0.0188326
160.39	-0.0130601	160.39	-0.0167773
160.6	-0.0100479	160.6	-0.0116656
160.79	-0.0124546	160.79	-0.0171467
160.99	-0.0130504	160.99	-0.01382
161.19	-0.012224	161.19	-0.0131834
161.39	-0.0119255	161.39	-0.0127661
161.6	-0.00635486	161.6	-0.014794
161.79	-0.00863696	161.79	-0.0134643
161.99	-0.0115566	161.99	-0.0125401
162.19	-0.0111496	162.19	-0.0158268
162.39	-0.0137363	162.39	-0.0119242
162.6	-0.00922653	162.6	-0.0149322
162.79	-0.0105939	162.79	-0.0139873
162.99	-0.010559	162.99	-0.0163662
163.19	-0.0153723	163.19	-0.0153011
163.39	-0.0126712	163.39	-0.0187712
163.6	-0.012044	163.6	-0.0158429
163.79	-0.00942946	163.79	-0.0134255
163.99	-0.0135013	163.99	-0.01481
164.2	-0.0103496	164.2	-0.0140086
164.39	-0.013047	164.39	-0.0154416
164.59	-0.0145079	164.59	-0.0148646
164.79	-0.0114165	164.79	-0.0156287
164.99	-0.0136793	164.99	-0.0153733
165.19	-0.0106663	165.19	-0.0109172
165.39	-0.00991937	165.39	-0.0162795
165.59	-0.00986898	165.59	-0.014647
165.79	-0.00850442	165.79	-0.0124689
165.99	-0.00748622	165.99	-0.0115133
166.19	-0.0115608	166.19	-0.013688
166.39	-0.0120761	166.39	-0.0139738
166.6	-0.0139201	166.6	-0.0129547
166.79	-0.014138	166.79	-0.0152923
166.99	-0.00590775	166.99	-0.016186
167.19	-0.0138895	167.19	-0.0180587
167.39	-0.0127551	167.39	-0.01476
167.59	-0.0110884	167.59	-0.0145235
167.79	-0.00863948	167.79	-0.0181836
167.99	-0.0116201	167.99	-0.0114146
168.19	-0.0143999	168.19	-0.0142874
168.39	-0.0126345	168.39	-0.0137168
168.6	-0.010135	168.6	-0.0161496
168.79	-0.0119063	168.79	-0.0150924
168.99	-0.0125443	168.99	-0.0142629
169.19	-0.0116767	169.19	-0.0149131
169.39	-0.0108954	169.39	-0.0120384
169.59	-0.0128218	169.59	-0.0156289
169.79	-0.0129313	169.79	-0.0146369
169.99	-0.0119426	169.99	-0.0171997
170.19	-0.00789402	170.19	-0.014082
170.39	-0.01163	170.39	-0.0140135
170.59	-0.0108763	170.59	-0.0188988
170.79	-0.0140829	170.79	-0.0158713
170.99	-0.0122263	170.99	-0.0145383
171.19	-0.0141254	171.19	-0.0187373
171.39	-0.0104963	171.39	-0.017701
171.59	-0.0127236	171.59	-0.0161331
171.79	-0.0120456	171.79	-0.015769
171.99	-0.0111109	171.99	-0.0149001
172.19	-0.0169217	172.19	-0.0170175
172.39	-0.0108905	172.39	-0.0148233
172.59	-0.0139644	172.59	-0.0117164
172.79	-0.0112824	172.79	-0.0151736
172.99	-0.0119739	172.99	-0.0136261
173.19	-0.0108404	173.19	-0.0163396
173.39	-0.0122891	173.39	-0.0169954
173.59	-0.0119858	173.59	-0.0172503
173.79	-0.0141056	173.79	-0.012813
173.99	-0.0120401	173.99	-0.0144865
174.2	-0.0142169	174.2	-0.0142206
174.39	-0.0125648	174.39	-0.0173253
174.6	-0.0161271	174.6	-0.0137821
174.79	-0.0131842	174.79	-0.0168465
174.99	-0.0106428	174.99	-0.0131284
175.19	-0.0117874	175.19	-0.0168075
175.39	-0.0149899	175.39	-0.00895544
175.6	-0.0138947	175.6	-0.0124606
175.79	-0.0152806	175.79	-0.0168171
175.99	-0.0146109	175.99	-0.0143853
176.19	-0.0132655	176.19	-0.0143574
176.39	-0.0117469	176.39	-0.0190372
176.6	-0.0158161	176.6	-0.0142221
176.79	-0.0135541	176.79	-0.0160499
176.99	-0.0127173	176.99	-0.016792
177.19	-0.0144246	177.19	-0.0154694
177.39	-0.0148027	177.39	-0.014226
177.6	-0.0109914	177.6	-0.0159878
177.79	-0.0144961	177.79	-0.0160631
177.99	-0.0113059	177.99	-0.0130774
178.19	-0.0141293	178.19	-0.014663
178.39	-0.0145135	178.39	-0.0151566
178.6	-0.0118769	178.6	-0.0121687
178.79	-0.0111084	178.79	-0.0158
178.99	-0.012414	178.99	-0.0153098
179.19	-0.0130408	179.19	-0.013275
179.39	-0.0117576	179.39	-0.0163002
179.59	-0.0124922	179.59	-0.0172146
179.79	-0.0122323	179.79	-0.0170957
179.99	-0.0147841	179.99	-0.0179717
180.19	-0.0136014	180.19	-0.0160149
180.39	-0.0148814	180.39	-0.0124833
180.6	-0.0151728	180.6	-0.0176738
180.79	-0.0119268	180.79	-0.0164854
180.99	-0.0130659	180.99	-0.0174114
181.19	-0.0106334	181.19	-0.0108079
181.39	-0.0138831	181.39	-0.0150893
181.59	-0.0119018	181.59	-0.0179703
181.79	-0.00976802	181.79	-0.0149855
181.99	-0.0128984	181.99	-0.013677
182.19	-0.0155818	182.19	-0.014642
182.39	-0.0121479	182.39	-0.0158843
182.59	-0.0123194	182.59	-0.0146418
182.79	-0.0116417	182.79	-0.0142474
182.99	-0.014803	182.99	-0.0155085
183.19	-0.0139751	183.19	-0.0166685
183.39	-0.0126234	183.39	-0.0155231
183.6	-0.0120986	183.6	-0.0178961
183.79	-0.0134553	183.79	-0.0156803
183.99	-0.013611	183.99	-0.0135066
184.19	-0.0145778	184.19	-0.0160633
184.39	-0.0109815	184.39	-0.014314
184.6	-0.00847973	184.6	-0.0125106
184.79	-0.0106985	184.79	-0.0176887
184.99	-0.00848702	184.99	-0.0162961
185.19	-0.0116056	185.19	-0.0158775
185.39	-0.014833	185.39	-0.0170565
185.59	-0.0122414	185.59	-0.0169089
185.79	-0.0118698	185.79	-0.0177771
185.99	-0.0132243	185.99	-0.0139564
186.19	-0.0152736	186.19	-0.0165714
186.39	-0.0124079	186.39	-0.0156936
186.59	-0.0149613	186.59	-0.0151048
186.79	-0.012138	186.79	-0.0140448
186.99	-0.0117575	186.99	-0.0133081
187.19	-0.0151322	187.19	-0.0147336
187.39	-0.0142509	187.39	-0.0146046
187.59	-0.0149878	187.59	-0.0134515
187.79	-0.0137629	187.79	-0.0180973
187.99	-0.0128048	187.99	-0.0186302
188.19	-0.0182051	188.19	-0.0169926
188.39	-0.0122977	188.39	-0.0196579
188.59	-0.0128947	188.59	-0.0171692
188.79	-0.0136442	188.79	-0.0168984
188.99	-0.0123717	188.99	-0.0157318
189.19	-0.0122314	189.19	-0.0118637
189.39	-0.0126497	189.39	-0.0136714
189.6	-0.0154508	189.6	-0.0169722
189.79	-0.0118108	189.79	-0.0159981
189.99	-0.0135292	189.99	-0.0180673
190.19	-0.0141483	190.19	-0.0158709
190.39	-0.0134126	190.39	-0.017614
190.59	-0.011816	190.59	-0.0140775
190.79	-0.0138497	190.79	-0.016066
190.99	-0.0177445	190.99	-0.0148314
191.19	-0.0147953	191.19	-0.0164697
191.39	-0.0136881	191.39	-0.0145523
191.59	-0.0119478	191.59	-0.0179191
191.79	-0.016188	191.79	-0.0158104
191.99	-0.0133886	191.99	-0.0163795
192.19	-0.0126129	192.19	-0.0147694
192.39	-0.0127576	192.39	-0.0135125
192.59	-0.0132383	192.59	-0.0153325
192.79	-0.0127573	192.79	-0.0212419
192.99	-0.0122849	192.99	-0.0168076
193.19	-0.0131816	193.19	-0.020351
193.39	-0.0162403	193.39	-0.0149842
193.59	-0.01077	193.59	-0.0160097
193.79	-0.0121844	193.79	-0.0160868
193.99	-0.0110812	193.99	-0.0191773
194.19	-0.0112967	194.19	-0.0178048
194.39	-0.0122069	194.39	-0.019469
194.6	-0.0101817	194.6	-0.0187351
194.79	-0.00988616	194.79	-0.0166981
194.99	-0.0119552	194.99	-0.0153836
195.19	-0.0147864	195.19	-0.0119697
195.39	-0.0154202	195.39	-0.0129571
195.6	-0.0115556	195.6	-0.0146621
195.79	-0.0170734	195.79	-0.0149428
195.99	-0.0112796	195.99	-0.016437
196.19	-0.0149711	196.19	-0.0183028
196.39	-0.0163489	196.39	-0.0170276
196.59	-0.0144117	196.59	-0.0154472
196.79	-0.0122414	196.79	-0.0138819
196.99	-0.0110387	196.99	-0.0168977
197.19	-0.012878	197.19	-0.0181968
197.39	-0.0166036	197.39	-0.0211815
197.6	-0.0153734	197.6	-0.0162567
197.79	-0.0129604	197.79	-0.0163667
197.99	-0.0107593	197.99	-0.0156486
198.19	-0.0141406	198.19	-0.0187812
198.39	-0.0143658	198.39	-0.0140494
198.6	-0.0147089	198.6	-0.0141543
198.79	-0.0153886	198.79	-0.0160264
198.99	-0.0124763	198.99	-0.017758
199.2	-0.0156966	199.2	-0.0138222
199.39	-0.0148779	199.39	-0.0128226	loading of proteins to tip
199.6	-0.0131697	199.6	-0.0163749
199.79	-0.0154221	199.79	-0.0148493
200	0.0118583	200	-0.0136547
200.19	0.011626	200.19	-0.0101157
200.39	0.00560149	200.39	-0.0130727
200.59	0.00936458	200.59	-0.010296
200.79	0.0100148	200.79	-0.0125253
200.99	0.0105443	200.99	-0.0122174
201.19	0.0120816	201.19	-0.0115932
201.39	0.0164276	201.39	-0.0128637
201.59	0.0140015	201.59	-0.00801116
201.79	0.0134415	201.79	-0.0122266
201.99	0.0113554	201.99	-0.0126775
202.19	0.018963	202.19	-0.0120073
202.39	0.0151268	202.39	-0.0108573
202.59	0.0196673	202.59	-0.010063
202.79	0.015608	202.79	-0.00530512
202.99	0.020078	202.99	-0.00665988
203.19	0.0147603	203.19	-0.00697007
203.39	0.0202597	203.39	-0.00931799
203.59	0.0184961	203.59	-0.00853509
203.79	0.0230284	203.79	-0.00737482
203.99	0.019603	203.99	-0.00377388
204.19	0.0209352	204.19	-0.00852298
204.39	0.0201153	204.39	-0.00405248
204.59	0.0268143	204.59	-0.00231314
204.79	0.02914	204.79	-0.00638154
204.99	0.0243081	204.99	-0.00812657
205.19	0.0247405	205.19	-0.00304636
205.39	0.0230648	205.39	-0.00128457
205.59	0.0250851	205.59	-1.428e-05
205.79	0.0267476	205.79	-0.00302395
205.99	0.0298445	205.99	7.549e-05
206.19	0.0298468	206.19	0.00050351
206.39	0.0301476	206.39	0.00378705
206.59	0.0305839	206.59	-0.00299863
206.79	0.0320873	206.79	0.00130883
206.99	0.0354331	206.99	0.00361206
207.19	0.0327074	207.19	0.00416739
207.39	0.0364427	207.39	0.00405299
207.59	0.0371813	207.59	0.00357473
207.79	0.031878	207.79	0.00826109
207.99	0.0396334	207.99	0.00307603
208.19	0.0377807	208.19	-0.0005868
208.39	0.0381186	208.39	0.00940547
208.59	0.0401499	208.59	0.00549929
208.79	0.0430697	208.79	0.00504749
208.99	0.0356777	208.99	0.00816961
209.19	0.0395904	209.19	0.00470619
209.39	0.0388522	209.39	0.00495308
209.59	0.0377593	209.59	0.00628762
209.79	0.0420705	209.79	0.0104235
209.99	0.0397501	209.99	0.00875747
210.19	0.0397287	210.19	0.00747667
210.39	0.0473414	210.39	0.0113629
210.59	0.0460549	210.59	0.0123782
210.79	0.0424559	210.79	0.00469502
210.99	0.046206	210.99	0.0084669
211.19	0.0498227	211.19	0.0128552
211.39	0.0489441	211.39	0.00775049
211.59	0.0501146	211.59	0.0130354
211.79	0.0472921	211.79	0.00957045
211.99	0.0486701	211.99	0.0114984
212.19	0.0517946	212.19	0.0133089
212.39	0.0549075	212.39	0.0107617
212.59	0.0558012	212.59	0.0175771
212.79	0.0541436	212.79	0.0143914
212.99	0.0555536	212.99	0.0142076
213.19	0.0551638	213.19	0.0122453
213.39	0.0578983	213.39	0.0148697
213.59	0.0599812	213.59	0.0129755
213.79	0.0536699	213.79	0.0139977
213.99	0.0580215	213.99	0.0136928
214.19	0.0562432	214.19	0.018175
214.39	0.0617002	214.39	0.0190113
214.59	0.0627081	214.59	0.0156781
214.79	0.0595414	214.79	0.0191363
214.99	0.0622439	214.99	0.0201121
215.19	0.0624815	215.19	0.0232782
215.39	0.0639312	215.39	0.0199116
215.59	0.0624277	215.59	0.0177605
215.79	0.0612695	215.79	0.0229019
215.99	0.0630466	215.99	0.0178133
216.19	0.0633309	216.19	0.0227962
216.39	0.0659756	216.39	0.0195733
216.59	0.07023	216.59	0.0232175
216.79	0.0676166	216.79	0.0235957
216.99	0.0680173	216.99	0.0258563
217.19	0.0714268	217.19	0.0250618
217.39	0.0739409	217.39	0.0224906
217.59	0.0722148	217.59	0.0252419
217.79	0.0750968	217.79	0.0260219
217.99	0.072627	217.99	0.0272111
218.19	0.0761229	218.19	0.0256693
218.39	0.0751731	218.39	0.0250303
218.59	0.0768211	218.59	0.0295332
218.79	0.0792291	218.79	0.0280227
218.99	0.0778947	218.99	0.0226348
219.19	0.077329	219.19	0.0287812
219.39	0.0755307	219.39	0.0279272
219.59	0.0792245	219.59	0.030422
219.79	0.0799302	219.79	0.0268794
219.99	0.0817333	219.99	0.0293825
220.19	0.0844067	220.19	0.0326313
220.39	0.0864888	220.39	0.0273962
220.59	0.0829128	220.59	0.0268622
220.79	0.0832802	220.79	0.0304577
220.99	0.0855061	220.99	0.0319057
221.19	0.0848178	221.19	0.0323149
221.39	0.0872558	221.39	0.0360385
221.59	0.0853268	221.59	0.0356727
221.79	0.0865634	221.79	0.0332655
221.99	0.0899177	221.99	0.0322682
222.19	0.0885817	222.19	0.0369988
222.39	0.0903595	222.39	0.030374
222.59	0.0932896	222.59	0.0435401
222.79	0.0892615	222.79	0.0358077
222.99	0.0931069	222.99	0.0347739
223.19	0.0916113	223.19	0.0343303
223.39	0.0976911	223.39	0.0344626
223.59	0.0941242	223.59	0.0363267
223.79	0.0969029	223.79	0.0421351
223.99	0.0959795	223.99	0.035977
224.19	0.0965836	224.19	0.0426578
224.39	0.0978952	224.39	0.0405246
224.59	0.103666	224.59	0.0423955
224.79	0.102731	224.79	0.0430615
224.99	0.100672	224.99	0.0410436
225.19	0.0963815	225.19	0.0423974
225.39	0.0983804	225.39	0.0419076
225.59	0.104225	225.59	0.0435926
225.79	0.105902	225.79	0.0432712
225.99	0.10498	225.99	0.0448438
226.19	0.104141	226.19	0.0439887
226.4	0.108451	226.4	0.04456
226.59	0.105924	226.59	0.046892
226.79	0.107842	226.79	0.0432683
226.99	0.113003	226.99	0.0472213
227.19	0.112216	227.19	0.0473985
227.39	0.111348	227.39	0.0453233
227.59	0.113005	227.59	0.0486885
227.79	0.110907	227.79	0.0521365
227.99	0.114739	227.99	0.0532021
228.19	0.115218	228.19	0.0458262
228.39	0.114048	228.39	0.049348
228.59	0.115062	228.59	0.0489915
228.79	0.114232	228.79	0.0521805
228.99	0.120435	228.99	0.0513427
229.19	0.113398	229.19	0.0496592
229.39	0.11868	229.39	0.0493876
229.59	0.119477	229.59	0.0523994
229.79	0.120139	229.79	0.0508209
229.99	0.120194	229.99	0.055563
230.19	0.123485	230.19	0.0569436
230.39	0.122148	230.39	0.0522624
230.59	0.125188	230.59	0.0517225
230.79	0.125573	230.79	0.0551773
230.99	0.126151	230.99	0.0550907
231.19	0.12818	231.19	0.052513
231.39	0.12532	231.39	0.0616741
231.59	0.127969	231.59	0.0579477
231.79	0.131472	231.79	0.0544651
231.99	0.12583	231.99	0.0579215
232.19	0.13118	232.19	0.0588164
232.39	0.12974	232.39	0.0575765
232.59	0.132746	232.59	0.0582867
232.79	0.135369	232.79	0.0590541
232.99	0.135187	232.99	0.0626772
233.19	0.130723	233.19	0.0591955
233.39	0.135424	233.39	0.0623733
233.59	0.136866	233.59	0.0610456
233.79	0.140587	233.79	0.0631847
233.99	0.135579	233.99	0.061245
234.19	0.137608	234.19	0.0592433
234.39	0.137977	234.39	0.0643356
234.59	0.140992	234.59	0.062217
234.79	0.139266	234.79	0.0631584
234.99	0.141405	234.99	0.067701
235.19	0.140687	235.19	0.0633145
235.39	0.140996	235.39	0.068174
235.59	0.143418	235.59	0.065745
235.79	0.147304	235.79	0.061534
235.99	0.143903	235.99	0.0642333
236.19	0.146475	236.19	0.0692479
236.39	0.146195	236.39	0.0701655
236.59	0.15181	236.59	0.0659008
236.79	0.152793	236.79	0.0679053
236.99	0.153081	236.99	0.0698243
237.19	0.151071	237.19	0.0712339
237.39	0.154137	237.39	0.0702162
237.59	0.153738	237.59	0.0654966
237.79	0.153848	237.79	0.0710801
237.99	0.154566	237.99	0.0720967
238.19	0.152458	238.19	0.0731145
238.39	0.157203	238.39	0.071575
238.59	0.158257	238.59	0.069864
238.79	0.158908	238.79	0.0692852
238.99	0.160464	238.99	0.0732025
239.19	0.162955	239.19	0.0780231
239.39	0.161059	239.39	0.0747544
239.59	0.159717	239.59	0.0720456
239.79	0.162844	239.79	0.0715904
239.99	0.16399	239.99	0.0726115
240.19	0.163741	240.19	0.0777883
240.39	0.16506	240.39	0.0735792
240.59	0.167076	240.59	0.0775919
240.79	0.168075	240.79	0.0766585
240.99	0.169155	240.99	0.0780625
241.19	0.167822	241.19	0.0758604
241.39	0.167353	241.39	0.0792791
241.59	0.169956	241.59	0.0813213
241.79	0.170071	241.79	0.0768704
241.99	0.171649	241.99	0.0841059
242.19	0.17318	242.19	0.0792468
242.39	0.173275	242.39	0.0836511
242.59	0.175626	242.59	0.0788276
242.79	0.175793	242.79	0.0861024
242.99	0.177914	242.99	0.0831236
243.19	0.174242	243.19	0.0838403
243.39	0.17893	243.39	0.0867473
243.59	0.178548	243.59	0.0831696
243.79	0.177306	243.79	0.0863968
243.99	0.181928	243.99	0.0867184
244.19	0.181394	244.19	0.0854148
244.39	0.180046	244.39	0.0838926
244.59	0.181263	244.59	0.0884927
244.79	0.187077	244.79	0.0862339
244.99	0.18903	244.99	0.0896932
245.19	0.185284	245.19	0.0868602
245.39	0.188573	245.39	0.0900301
245.59	0.185641	245.59	0.0861674
245.79	0.189299	245.79	0.0846003
245.99	0.187107	245.99	0.0904021
246.19	0.193564	246.19	0.0899061
246.39	0.189024	246.39	0.0859598
246.59	0.191844	246.59	0.0900726
246.79	0.191372	246.79	0.0894776
246.99	0.189949	246.99	0.0935565
247.19	0.194529	247.19	0.090348
247.39	0.195344	247.39	0.0917287
247.59	0.196404	247.59	0.096093
247.79	0.197046	247.79	0.0956791
247.99	0.197613	247.99	0.0949057
248.19	0.19859	248.19	0.096546
248.39	0.2011	248.39	0.0994021
248.59	0.201559	248.59	0.0966539
248.79	0.197235	248.79	0.0934094
248.99	0.199915	248.99	0.0942087
249.19	0.202947	249.19	0.0953493
249.39	0.20226	249.39	0.0950953
249.59	0.204209	249.59	0.0977998
249.79	0.207844	249.79	0.0953321
249.99	0.203949	249.99	0.09889
250.19	0.210859	250.19	0.103385
250.39	0.211962	250.39	0.0974664
250.59	0.21441	250.59	0.100666
250.79	0.209342	250.79	0.101148
250.99	0.213319	250.99	0.106611
251.19	0.214408	251.19	0.106554
251.39	0.212547	251.39	0.100523
251.59	0.216083	251.59	0.102547
251.79	0.217467	251.79	0.107163
251.99	0.216099	251.99	0.107451
252.19	0.21726	252.19	0.106013
252.39	0.213256	252.39	0.108881
252.59	0.22161	252.59	0.103621
252.79	0.218695	252.79	0.105721
252.99	0.219076	252.99	0.107561
253.19	0.222143	253.19	0.108745
253.39	0.227106	253.39	0.109059
253.59	0.225323	253.59	0.109445
253.79	0.223356	253.79	0.108377
253.99	0.220578	253.99	0.112775
254.19	0.226399	254.19	0.110184
254.39	0.223343	254.39	0.110787
254.59	0.224594	254.59	0.107988
254.79	0.226418	254.79	0.113069
254.99	0.229692	254.99	0.113309
255.19	0.230672	255.19	0.11323
255.39	0.231052	255.39	0.116978
255.59	0.233766	255.59	0.116001
255.79	0.234702	255.79	0.111202
255.99	0.235854	255.99	0.113445
256.19	0.234158	256.19	0.112375
256.39	0.23524	256.39	0.118256
256.59	0.239414	256.59	0.116346
256.79	0.237758	256.79	0.120463
256.99	0.239783	256.99	0.118036
257.19	0.243677	257.19	0.114976
257.39	0.241042	257.39	0.114506
257.59	0.240433	257.59	0.122021
257.79	0.24033	257.79	0.113826
257.99	0.240407	257.99	0.116556
258.19	0.24466	258.19	0.123671
258.39	0.245483	258.39	0.116437
258.59	0.241927	258.59	0.124062
258.79	0.248233	258.79	0.121163
258.99	0.242558	258.99	0.124533
259.19	0.250059	259.19	0.123751
259.39	0.253299	259.39	0.123094
259.59	0.25064	259.59	0.130501
259.79	0.248741	259.79	0.1211
259.99	0.247943	259.99	0.122465
260.19	0.256808	260.19	0.127133
260.39	0.253307	260.39	0.125646
260.59	0.253783	260.59	0.128241
260.79	0.255706	260.79	0.128324
260.99	0.25888	260.99	0.126572
261.19	0.255128	261.19	0.124885
261.39	0.257051	261.39	0.128682
261.59	0.258902	261.59	0.134017
261.79	0.255654	261.79	0.131307
261.99	0.263959	261.99	0.1259
262.19	0.258991	262.19	0.135088
262.39	0.26253	262.39	0.128571
262.59	0.265049	262.59	0.133312
262.79	0.263483	262.79	0.13249
262.99	0.266061	262.99	0.133897
263.19	0.265244	263.19	0.132431
263.39	0.266497	263.39	0.133845
263.59	0.267905	263.59	0.138515
263.79	0.26904	263.79	0.134713
263.99	0.264542	263.99	0.13016
264.19	0.269631	264.19	0.134573
264.39	0.269418	264.39	0.132813
264.59	0.274254	264.59	0.138171
264.79	0.2779	264.79	0.138056
264.99	0.272696	264.99	0.139579
265.19	0.274453	265.19	0.137416
265.39	0.273455	265.39	0.136855
265.59	0.277305	265.59	0.138195
265.79	0.277398	265.79	0.140114
265.99	0.276427	265.99	0.139326
266.19	0.278211	266.19	0.140789
266.39	0.28243	266.39	0.139976
266.59	0.281965	266.59	0.144062
266.79	0.284998	266.79	0.144434
266.99	0.286365	266.99	0.143724
267.19	0.285048	267.19	0.145331
267.39	0.287526	267.39	0.143378
267.59	0.287633	267.59	0.144223
267.79	0.282928	267.79	0.145843
267.99	0.29156	267.99	0.149126
268.19	0.285858	268.19	0.144534
268.39	0.290084	268.39	0.146311
268.59	0.288383	268.59	0.144695
268.79	0.291575	268.79	0.14598
268.99	0.291544	268.99	0.146023
269.19	0.29297	269.19	0.152236
269.39	0.294176	269.39	0.149474
269.59	0.297095	269.59	0.146876
269.79	0.293656	269.79	0.1491
269.99	0.299787	269.99	0.152046
270.19	0.297539	270.19	0.150353
270.39	0.297902	270.39	0.149629
270.59	0.296883	270.59	0.155055
270.79	0.300716	270.79	0.151302
270.99	0.303344	270.99	0.157553
271.19	0.302618	271.19	0.149916
271.39	0.303475	271.39	0.158356
271.59	0.303383	271.59	0.153223
271.79	0.30877	271.79	0.156402
271.99	0.309252	271.99	0.158762
272.19	0.306303	272.19	0.156613
272.39	0.303954	272.39	0.158844
272.59	0.311054	272.59	0.154306
272.79	0.310427	272.79	0.160047
272.99	0.309203	272.99	0.156219
273.19	0.312449	273.19	0.159807
273.39	0.308246	273.39	0.161024
273.59	0.31197	273.59	0.16528
273.79	0.314803	273.79	0.163466
273.99	0.317436	273.99	0.163927
274.19	0.319199	274.19	0.163017
274.39	0.317162	274.39	0.166823
274.59	0.317173	274.59	0.165819
274.79	0.32063	274.79	0.162008
274.99	0.320549	274.99	0.164957
275.19	0.324711	275.19	0.162231
275.39	0.321824	275.39	0.163209
275.59	0.322112	275.59	0.162535
275.79	0.320693	275.79	0.165904
275.99	0.324349	275.99	0.16755
276.19	0.328032	276.19	0.170525
276.39	0.32597	276.39	0.170128
276.59	0.325998	276.59	0.165094
276.79	0.323479	276.79	0.166743
276.99	0.326119	276.99	0.170444
277.19	0.329539	277.19	0.174408
277.39	0.330244	277.39	0.169359
277.59	0.331175	277.59	0.170353
277.79	0.333006	277.79	0.17574
277.99	0.332347	277.99	0.173595
278.19	0.332295	278.19	0.173617
278.39	0.332367	278.39	0.170314
278.59	0.333214	278.59	0.172121
278.79	0.33538	278.79	0.177336
278.99	0.338106	278.99	0.175763
279.19	0.340647	279.19	0.177774
279.39	0.340721	279.39	0.173265
279.59	0.338306	279.59	0.177197
279.79	0.339271	279.79	0.179444
279.99	0.338741	279.99	0.174051
280.19	0.345776	280.19	0.177068
280.39	0.346137	280.39	0.177819
280.59	0.345053	280.59	0.18195
280.79	0.345727	280.79	0.179355
280.99	0.344723	280.99	0.182973
281.19	0.348028	281.19	0.180198
281.39	0.350332	281.39	0.178839
281.59	0.347198	281.59	0.180822
281.79	0.351562	281.79	0.180123
281.99	0.352843	281.99	0.186672
282.19	0.350773	282.19	0.181991
282.39	0.350168	282.39	0.184911
282.59	0.353269	282.59	0.185177
282.79	0.354687	282.79	0.183387
282.99	0.352703	282.99	0.189058
283.19	0.354871	283.19	0.185773
283.39	0.358333	283.39	0.188272
283.59	0.355236	283.59	0.18844
283.79	0.359393	283.79	0.184639
283.99	0.356121	283.99	0.187631
284.19	0.358591	284.19	0.18918
284.39	0.359451	284.39	0.183576
284.59	0.361217	284.59	0.190725
284.79	0.366629	284.79	0.190744
284.99	0.361303	284.99	0.193093
285.19	0.365756	285.19	0.193794
285.39	0.369342	285.39	0.191654
285.59	0.363473	285.59	0.195713
285.79	0.370181	285.79	0.194111
285.99	0.372412	285.99	0.192414
286.19	0.368873	286.19	0.192145
286.39	0.368495	286.39	0.196455
286.59	0.37331	286.59	0.19383
286.79	0.372424	286.79	0.19549
286.99	0.37337	286.99	0.198473
287.19	0.374434	287.19	0.193214
287.39	0.373259	287.39	0.200521
287.59	0.375167	287.59	0.2004
287.79	0.375289	287.79	0.198432
287.99	0.373963	287.99	0.196506
288.19	0.379084	288.19	0.197909
288.39	0.379692	288.39	0.200105
288.59	0.381159	288.59	0.196213
288.79	0.381269	288.79	0.201142
288.99	0.384167	288.99	0.200943
289.19	0.384096	289.19	0.205625
289.39	0.381775	289.39	0.202567
289.59	0.384854	289.59	0.20268
289.79	0.384263	289.79	0.201018
289.99	0.387952	289.99	0.207487
290.19	0.389471	290.19	0.209575
290.39	0.389329	290.39	0.205398
290.59	0.389935	290.59	0.209274
290.79	0.388302	290.79	0.206324
290.99	0.390873	290.99	0.207479
291.19	0.392632	291.19	0.209412
291.39	0.394379	291.39	0.210856
291.6	0.393804	291.6	0.209108
291.79	0.392671	291.79	0.210193
291.99	0.397939	291.99	0.211849
292.19	0.39717	292.19	0.209502
292.39	0.398244	292.39	0.208624
292.59	0.39925	292.59	0.211966
292.79	0.399778	292.79	0.211779
292.99	0.401205	292.99	0.215385
293.19	0.399153	293.19	0.211105
293.39	0.399211	293.39	0.216438
293.59	0.401879	293.59	0.213446
293.79	0.403759	293.79	0.214314
294.01	0.404222	294.01	0.217018
294.19	0.404864	294.19	0.214179
294.39	0.407636	294.39	0.216304
294.59	0.408224	294.59	0.218677
294.79	0.402947	294.79	0.220013
294.99	0.406973	294.99	0.218588
295.19	0.406766	295.19	0.22209
295.39	0.410307	295.39	0.222407
295.59	0.407257	295.59	0.219088
295.79	0.408644	295.79	0.217662
295.99	0.410835	295.99	0.221971
296.19	0.41197	296.19	0.223181
296.39	0.41596	296.39	0.222392
296.59	0.414784	296.59	0.227726
296.79	0.416789	296.79	0.221117
296.99	0.415786	296.99	0.223603
297.19	0.41939	297.19	0.221707
297.39	0.417444	297.39	0.227052
297.59	0.416501	297.59	0.228858
297.79	0.418871	297.79	0.227622
297.99	0.421335	297.99	0.222932
298.19	0.421217	298.19	0.225415
298.39	0.42405	298.39	0.227713
298.59	0.420771	298.59	0.229219
298.79	0.423668	298.79	0.231559
298.99	0.423877	298.99	0.228694
299.19	0.425604	299.19	0.227347
299.39	0.429048	299.39	0.229454
299.59	0.426489	299.59	0.233184
299.79	0.429651	299.79	0.233487
299.99	0.427021	299.99	0.228553
300.19	0.429771	300.19	0.234834
300.39	0.429143	300.39	0.23468
300.59	0.429101	300.59	0.232519
300.79	0.431977	300.79	0.232623
300.99	0.434883	300.99	0.23236
301.19	0.433671	301.19	0.236044
301.39	0.433897	301.39	0.235761
301.59	0.441315	301.59	0.2384
301.79	0.433638	301.79	0.234826
301.99	0.438877	301.99	0.240485
302.19	0.439565	302.19	0.236664
302.39	0.439797	302.39	0.234423
302.59	0.443467	302.59	0.240101
302.79	0.444242	302.79	0.243108
302.99	0.44157	302.99	0.238982
303.19	0.443427	303.19	0.243933
303.39	0.445214	303.39	0.240896
303.59	0.445666	303.59	0.240598
303.79	0.443575	303.79	0.241109
303.99	0.446238	303.99	0.240411
304.19	0.443579	304.19	0.242171
304.39	0.451986	304.39	0.246842
304.59	0.446502	304.59	0.24611
304.79	0.44945	304.79	0.246578
304.99	0.449982	304.99	0.247625
305.19	0.453208	305.19	0.242649
305.39	0.453455	305.39	0.247653
305.59	0.454861	305.59	0.251206
305.79	0.452266	305.79	0.250858
305.99	0.458415	305.99	0.249011
306.19	0.454141	306.19	0.251614
306.39	0.459246	306.39	0.246323
306.59	0.460217	306.59	0.250955
306.79	0.454531	306.79	0.249972
306.99	0.458276	306.99	0.250539
307.19	0.461933	307.19	0.252673
307.39	0.46105	307.39	0.25429
307.59	0.460554	307.59	0.255613
307.79	0.467578	307.79	0.25466
307.99	0.464144	307.99	0.256837
308.19	0.465575	308.19	0.254129
308.39	0.465073	308.39	0.254649
308.59	0.467337	308.59	0.255137
308.79	0.468837	308.79	0.260015
308.99	0.47006	308.99	0.257877
309.19	0.468197	309.19	0.259984
309.39	0.467884	309.39	0.260756
309.59	0.469578	309.59	0.257644
309.79	0.472753	309.79	0.26363
309.99	0.473717	309.99	0.260663
310.19	0.473507	310.19	0.264567
310.39	0.472379	310.39	0.262146
310.59	0.478463	310.59	0.259811
310.79	0.473993	310.79	0.265322
310.99	0.476387	310.99	0.261248
311.19	0.477767	311.19	0.263673
311.39	0.478822	311.39	0.258446
311.59	0.481531	311.59	0.266455
311.79	0.481448	311.79	0.260411
311.99	0.480736	311.99	0.267131
312.19	0.48143	312.19	0.265862
312.39	0.480046	312.39	0.26421
312.59	0.482942	312.59	0.268837
312.79	0.48556	312.79	0.264031
312.99	0.486784	312.99	0.269067
313.19	0.488204	313.19	0.268027
313.39	0.486551	313.39	0.271155
313.59	0.490924	313.59	0.271934
313.79	0.489674	313.79	0.2716
313.99	0.489213	313.99	0.26695
314.19	0.487809	314.19	0.273984
314.39	0.489612	314.39	0.274143
314.59	0.49474	314.59	0.273137
314.79	0.493174	314.79	0.273793
314.99	0.488884	314.99	0.269595
315.19	0.494383	315.19	0.273374
315.39	0.493099	315.39	0.27565
315.59	0.493664	315.59	0.273129
315.79	0.497129	315.79	0.278397
315.99	0.497747	315.99	0.275632
316.19	0.499473	316.19	0.27735
316.39	0.500651	316.39	0.277382
316.59	0.501249	316.59	0.279948
316.79	0.50105	316.79	0.278752
316.99	0.50282	316.99	0.277453
317.19	0.500137	317.19	0.278803
317.39	0.504469	317.39	0.27874
317.59	0.500658	317.59	0.279881
317.79	0.503334	317.79	0.284706
317.99	0.510588	317.99	0.283379
318.19	0.505018	318.19	0.28295
318.39	0.507207	318.39	0.28219
318.59	0.508451	318.59	0.281744
318.79	0.508937	318.79	0.28387
318.99	0.510873	318.99	0.284304
319.19	0.509898	319.19	0.285276
319.39	0.51309	319.39	0.286931
319.59	0.512755	319.59	0.287509
319.79	0.513544	319.79	0.285784
319.99	0.515107	319.99	0.286039
320.19	0.513946	320.19	0.289626
320.39	0.516683	320.39	0.28918
320.59	0.516576	320.59	0.291774
320.79	0.523605	320.79	0.292468
320.99	0.52027	320.99	0.290149
321.19	0.517555	321.19	0.293499
321.39	0.523155	321.39	0.291542
321.59	0.518767	321.59	0.293741
321.79	0.522185	321.79	0.296032
321.99	0.523925	321.99	0.294939
322.19	0.525155	322.19	0.294455
322.39	0.526842	322.39	0.295087
322.59	0.527043	322.59	0.298347
322.79	0.523696	322.79	0.295753
322.99	0.523468	322.99	0.293835
323.19	0.533047	323.19	0.296264
323.39	0.531644	323.39	0.299929
323.59	0.526929	323.59	0.297536
323.79	0.527615	323.79	0.300315
323.99	0.532202	323.99	0.295989
324.19	0.53472	324.19	0.299523
324.39	0.533091	324.39	0.298016
324.59	0.536681	324.59	0.299277
324.79	0.533419	324.79	0.299283
324.99	0.538156	324.99	0.309307
325.19	0.53536	325.19	0.300802
325.39	0.53777	325.39	0.304313
325.59	0.540191	325.59	0.304444
325.79	0.539746	325.79	0.305079
325.99	0.54228	325.99	0.306197
326.19	0.541341	326.19	0.305471
326.39	0.541879	326.39	0.305694
326.59	0.543015	326.59	0.307817
326.79	0.541402	326.79	0.306334
326.99	0.540183	326.99	0.302007
327.19	0.547839	327.19	0.306206
327.39	0.549655	327.39	0.308286
327.59	0.549027	327.59	0.310675
327.79	0.549898	327.79	0.310854
327.99	0.549483	327.99	0.309777
328.19	0.548437	328.19	0.312184
328.39	0.55071	328.39	0.310469
328.59	0.552045	328.59	0.311263
328.79	0.553525	328.79	0.316938
328.99	0.552223	328.99	0.314766
329.19	0.552828	329.19	0.31586
329.39	0.555628	329.39	0.315808
329.59	0.555982	329.59	0.313744
329.79	0.556068	329.79	0.316405
329.99	0.557713	329.99	0.318782
330.19	0.559269	330.19	0.315186
330.39	0.560639	330.39	0.317188
330.59	0.557374	330.59	0.317826
330.79	0.561908	330.79	0.315489
330.99	0.55888	330.99	0.322745
331.19	0.564096	331.19	0.317829
331.39	0.564332	331.39	0.319602
331.59	0.56318	331.59	0.321793
331.79	0.564894	331.79	0.324825
331.99	0.566662	331.99	0.318434
332.19	0.561175	332.19	0.320211
332.39	0.564135	332.39	0.322022
332.59	0.566561	332.59	0.319581
332.79	0.566979	332.79	0.321208
332.99	0.567928	332.99	0.325823
333.19	0.571075	333.19	0.32288
333.39	0.574138	333.39	0.328047
333.59	0.571945	333.59	0.320809
333.79	0.572865	333.79	0.327636
333.99	0.574828	333.99	0.325237
334.19	0.575124	334.19	0.327811
334.39	0.575286	334.39	0.32746
334.59	0.578032	334.59	0.332098
334.79	0.574963	334.79	0.328705
334.99	0.574987	334.99	0.328863
335.19	0.574925	335.19	0.331634
335.39	0.577708	335.39	0.331396
335.59	0.578689	335.59	0.330506
335.79	0.578564	335.79	0.335271
335.99	0.584527	335.99	0.333804
336.19	0.58322	336.19	0.332449
336.39	0.583817	336.39	0.332779
336.59	0.584921	336.59	0.334338
336.79	0.582688	336.79	0.334975
336.99	0.585053	336.99	0.334322
337.19	0.584259	337.19	0.333097
337.39	0.585032	337.39	0.339775
337.59	0.58602	337.59	0.34159
337.79	0.591084	337.79	0.338472
337.99	0.587165	337.99	0.341474
338.19	0.591459	338.19	0.338286
338.39	0.590311	338.39	0.339173
338.59	0.594738	338.59	0.340511
338.79	0.593652	338.79	0.343776
338.99	0.591993	338.99	0.339664
339.19	0.592346	339.19	0.343592
339.39	0.593381	339.39	0.341188
339.59	0.600262	339.59	0.342749
339.79	0.598663	339.79	0.348015
339.99	0.59802	339.99	0.344637
340.19	0.599022	340.19	0.345223
340.39	0.599545	340.39	0.348155
340.59	0.603624	340.59	0.341936
340.79	0.597391	340.79	0.346265
340.99	0.599404	340.99	0.346393
341.19	0.60045	341.19	0.346469
341.39	0.604331	341.39	0.347258
341.59	0.604997	341.59	0.347087
341.79	0.602603	341.79	0.347207
341.99	0.606967	341.99	0.352063
342.19	0.607913	342.19	0.350023
342.39	0.608406	342.39	0.349088
342.59	0.607554	342.59	0.35316
342.79	0.60816	342.79	0.354245
342.99	0.609347	342.99	0.349201
343.19	0.614007	343.19	0.35065
343.39	0.610225	343.39	0.354337
343.59	0.610172	343.59	0.353281
343.79	0.617693	343.79	0.35791
343.99	0.611671	343.99	0.355505
344.19	0.614602	344.19	0.359555
344.39	0.617604	344.39	0.356291
344.59	0.61627	344.59	0.357756
344.79	0.617199	344.79	0.360692
344.99	0.62028	344.99	0.357088
345.19	0.621963	345.19	0.360628
345.39	0.620824	345.39	0.359785
345.59	0.622803	345.59	0.360188
345.79	0.623494	345.79	0.359581
345.99	0.623057	345.99	0.358962
346.19	0.626933	346.19	0.358265
346.39	0.625698	346.39	0.360028
346.59	0.62317	346.59	0.358576
346.79	0.625632	346.79	0.358116
346.99	0.628634	346.99	0.364798
347.19	0.628094	347.19	0.362583
347.39	0.629918	347.39	0.367452
347.59	0.630597	347.59	0.36555
347.79	0.630121	347.79	0.365955
347.99	0.626811	347.99	0.365892
348.19	0.629667	348.19	0.366946
348.39	0.632729	348.39	0.369564
348.59	0.631706	348.59	0.366709
348.79	0.63379	348.79	0.366492
348.99	0.633995	348.99	0.370376
349.19	0.634347	349.19	0.367923
349.39	0.635346	349.39	0.362726
349.59	0.635156	349.59	0.370484
349.79	0.634244	349.79	0.370003
349.99	0.640112	349.99	0.36977
350.19	0.63801	350.19	0.373775
350.39	0.638654	350.39	0.372541
350.59	0.640669	350.59	0.366606
350.79	0.642011	350.79	0.3717
350.99	0.641971	350.99	0.374603
351.19	0.644795	351.19	0.373694
351.39	0.648922	351.39	0.376288
351.59	0.643196	351.59	0.37935
351.79	0.647782	351.79	0.377589
351.99	0.647381	351.99	0.38044
352.19	0.647354	352.19	0.38201
352.39	0.65094	352.39	0.378266
352.59	0.650248	352.59	0.378835
352.79	0.646644	352.79	0.37935
352.99	0.655118	352.99	0.380928
353.19	0.655192	353.19	0.380913
353.39	0.653435	353.39	0.381698
353.59	0.653714	353.59	0.381548
353.79	0.654582	353.79	0.38196
353.99	0.654006	353.99	0.389995
354.19	0.652268	354.19	0.383454
354.39	0.656214	354.39	0.384868
354.59	0.657203	354.59	0.383946
354.79	0.657188	354.79	0.388587
354.99	0.660368	354.99	0.388414
355.19	0.65791	355.19	0.386093
355.39	0.66218	355.39	0.385615
355.59	0.662337	355.59	0.388099
355.79	0.662869	355.79	0.390147
355.99	0.662945	355.99	0.387245
356.19	0.664894	356.19	0.39566
356.39	0.666351	356.39	0.391879
356.59	0.66194	356.59	0.389095
356.79	0.667293	356.79	0.388612
356.99	0.669338	356.99	0.388725
357.19	0.666501	357.19	0.390155
357.39	0.672828	357.39	0.397209
357.59	0.670157	357.59	0.392599
357.79	0.664886	357.79	0.395685
357.99	0.674722	357.99	0.393546
358.19	0.673625	358.19	0.393081
358.39	0.671091	358.39	0.401219
358.59	0.673554	358.59	0.398851
358.79	0.676206	358.79	0.395676
358.99	0.671575	358.99	0.396074
359.19	0.677363	359.19	0.396438
359.39	0.678317	359.39	0.400052
359.59	0.684694	359.59	0.398273
359.79	0.676285	359.79	0.40001
359.99	0.681225	359.99	0.399462
360.19	0.682712	360.19	0.398147
360.39	0.681661	360.39	0.396428
360.59	0.683834	360.59	0.403046
360.79	0.685064	360.79	0.397707
360.99	0.680691	360.99	0.401375
361.19	0.685444	361.19	0.402544
361.39	0.682883	361.39	0.399537
361.59	0.689799	361.59	0.405262
361.79	0.684671	361.79	0.408095
361.99	0.687918	361.99	0.406432
362.19	0.686116	362.19	0.406465
362.39	0.688596	362.39	0.405036
362.59	0.68968	362.59	0.403548
362.79	0.689189	362.79	0.406792
362.99	0.689017	362.99	0.409136
363.19	0.69324	363.19	0.407647
363.39	0.693574	363.39	0.408817
363.59	0.691254	363.59	0.405212
363.79	0.693772	363.79	0.410582
363.99	0.695433	363.99	0.411406
364.19	0.698346	364.19	0.41207
364.39	0.695791	364.39	0.409923
364.59	0.696331	364.59	0.415673
364.79	0.697349	364.79	0.411821
364.99	0.703396	364.99	0.410076
365.19	0.698356	365.19	0.411376
365.39	0.701928	365.39	0.414525
365.59	0.700695	365.59	0.417595
365.79	0.698568	365.79	0.414953
365.99	0.704322	365.99	0.417853
366.19	0.702508	366.19	0.415591
366.39	0.699592	366.39	0.414101
366.59	0.703498	366.59	0.415183
366.79	0.710803	366.79	0.420661
366.99	0.702529	366.99	0.421452
367.19	0.705405	367.19	0.419853
367.39	0.708937	367.39	0.419517
367.59	0.711543	367.59	0.421707
367.79	0.71235	367.79	0.422166
367.99	0.710174	367.99	0.421118
368.19	0.711358	368.19	0.42005
368.39	0.710555	368.39	0.422244
368.59	0.712354	368.59	0.425359
368.79	0.716429	368.79	0.419842
368.99	0.71493	368.99	0.424931
369.19	0.718025	369.19	0.428057
369.39	0.717308	369.39	0.427445
369.59	0.714145	369.59	0.427771
369.79	0.719096	369.79	0.428955
369.99	0.719978	369.99	0.429168
370.19	0.723444	370.19	0.427446
370.39	0.721786	370.39	0.431061
370.59	0.722952	370.59	0.427878
370.79	0.724286	370.79	0.430808
370.99	0.727553	370.99	0.433952
371.19	0.727276	371.19	0.429435
371.39	0.722884	371.39	0.428808
371.59	0.727679	371.59	0.429046
371.79	0.724707	371.79	0.430512
371.99	0.725944	371.99	0.43266
372.19	0.729752	372.19	0.434371
372.39	0.729168	372.39	0.43402
372.59	0.733033	372.59	0.436914
372.79	0.729948	372.79	0.433214
372.99	0.729923	372.99	0.43517
373.19	0.731744	373.19	0.432645
373.39	0.734016	373.39	0.44028
373.59	0.733417	373.59	0.438397
373.79	0.737594	373.79	0.436917
373.99	0.736217	373.99	0.436532
374.19	0.735011	374.19	0.441394
374.39	0.739179	374.39	0.434735
374.59	0.736355	374.59	0.441448
374.79	0.738127	374.79	0.442507
374.99	0.741941	374.99	0.441005
375.19	0.737297	375.19	0.440804
375.39	0.742934	375.39	0.441633
375.59	0.741785	375.59	0.438491
375.79	0.741904	375.79	0.440522
375.99	0.744043	375.99	0.444827
376.19	0.743009	376.19	0.444697
376.39	0.743992	376.39	0.447083
376.59	0.746387	376.59	0.443043
376.79	0.745981	376.79	0.442656
376.99	0.743002	376.99	0.444146
377.19	0.746052	377.19	0.444496
377.39	0.751463	377.39	0.450897
377.59	0.747544	377.59	0.447278
377.79	0.750396	377.79	0.450398
377.99	0.750249	377.99	0.452774
378.19	0.749281	378.19	0.447218
378.39	0.750884	378.39	0.448311
378.59	0.752277	378.59	0.451936
378.79	0.755242	378.79	0.455774
378.99	0.754503	378.99	0.451661
379.19	0.76009	379.19	0.457478
379.39	0.760817	379.39	0.453972
379.59	0.759215	379.59	0.451876
379.79	0.757299	379.79	0.454851
379.99	0.762633	379.99	0.451117
380.19	0.762341	380.19	0.452783
380.39	0.761434	380.39	0.459783
380.59	0.761967	380.59	0.454741
380.79	0.761478	380.79	0.456348
380.99	0.762724	380.99	0.456405
381.19	0.76275	381.19	0.456509
381.39	0.764796	381.39	0.460341
381.59	0.768242	381.59	0.456132
381.79	0.765875	381.79	0.459347
381.99	0.763248	381.99	0.456421
382.19	0.763527	382.19	0.456024
382.39	0.768324	382.39	0.457471
382.59	0.770976	382.59	0.461931
382.79	0.772963	382.79	0.466222
382.99	0.767912	382.99	0.460832
383.19	0.771391	383.19	0.462375
383.39	0.7715	383.39	0.462614
383.59	0.771334	383.59	0.46188
383.79	0.77391	383.79	0.463695
383.99	0.777192	383.99	0.46876
384.19	0.775936	384.19	0.466868
384.39	0.776413	384.39	0.467279
384.59	0.77724	384.59	0.470333
384.79	0.777177	384.79	0.46694
384.99	0.778128	384.99	0.467998
385.19	0.77866	385.19	0.465369
385.39	0.778597	385.39	0.467895
385.59	0.776819	385.59	0.465683
385.79	0.781639	385.79	0.469231
385.99	0.777625	385.99	0.47192
386.19	0.78113	386.19	0.471048
386.39	0.784829	386.39	0.474908
386.59	0.786016	386.59	0.477282
386.79	0.781437	386.79	0.471407
386.99	0.786464	386.99	0.468266
387.19	0.783905	387.19	0.473998
387.39	0.783577	387.39	0.474248
387.59	0.788556	387.59	0.474365
387.79	0.787866	387.79	0.478021
387.99	0.787271	387.99	0.477843
388.19	0.792192	388.19	0.479583
388.39	0.789749	388.39	0.479353
388.59	0.79395	388.59	0.480709
388.79	0.794167	388.79	0.482424
388.99	0.792472	388.99	0.481694
389.19	0.796724	389.19	0.478688
389.39	0.794532	389.39	0.481048
389.59	0.796408	389.59	0.477364
389.79	0.798582	389.79	0.47972
389.99	0.793544	389.99	0.482229
390.19	0.799217	390.19	0.480218
390.39	0.798551	390.39	0.481005
390.59	0.797447	390.59	0.47965
390.79	0.798618	390.79	0.481524
390.99	0.801673	390.99	0.482153
391.19	0.800475	391.19	0.484231
391.39	0.803388	391.39	0.485091
391.59	0.80409	391.59	0.485351
391.79	0.805916	391.79	0.48537
391.99	0.804627	391.99	0.488768
392.19	0.80825	392.19	0.48491
392.39	0.804793	392.39	0.489327
392.59	0.805726	392.59	0.488427
392.79	0.804714	392.79	0.493163
392.99	0.809346	392.99	0.486095
393.19	0.810505	393.19	0.487069
393.39	0.812183	393.39	0.494532
393.59	0.812304	393.59	0.489373
393.79	0.813776	393.79	0.489692
393.99	0.81148	393.99	0.491974
394.19	0.815727	394.19	0.495061
394.39	0.815376	394.39	0.493298
394.59	0.813451	394.59	0.491563
394.79	0.814702	394.79	0.493471
394.99	0.818911	394.99	0.494822
395.19	0.814635	395.19	0.498165
395.39	0.820342	395.39	0.491761
395.59	0.816685	395.59	0.497634
395.79	0.822871	395.79	0.498942
395.99	0.821708	395.99	0.50011
396.19	0.822071	396.19	0.497428
396.39	0.821836	396.39	0.50253
396.59	0.821059	396.59	0.496628
396.79	0.823917	396.79	0.501471
396.99	0.823892	396.99	0.500749
397.19	0.827366	397.19	0.500313
397.39	0.825643	397.39	0.503165
397.59	0.829459	397.59	0.502297
397.79	0.825711	397.79	0.497942
397.99	0.826464	397.99	0.502575
398.19	0.828805	398.19	0.500875
398.39	0.835086	398.39	0.504872
398.59	0.831384	398.59	0.499679
398.79	0.832372	398.79	0.502482
398.99	0.831403	398.99	0.510488
399.19	0.834836	399.19	0.505209
[truncated: 47,036 more rows]

## Sheet: disso rates after fitting
	k fast						k slow
	wt			∆∆			wt			∆∆
	rep1	rep2	rep3	rep1	rep2	rep3	rep1	rep2	rep3	rep1	rep2	rep3
	0.006326	0.005012	0.01156	0.0103	0.0066	0.0097	0.0003136	0.001121	0.002032	0.0006992	0.00143	0.001959
