# Supplementary material for: Unstructured regions in IRE1α specify BiP-mediated destabilisation of the luminal domain dimer and repression of the UPR
Source: eLife. 2019 Dec 24;8:e50793. doi: 10.7554/eLife.50793 (PMC6996924; doi:10.7554/eLife.50793)
Supplement: Figure 5—source data 2. [file elife-50793-fig5-data2.xlsx]

## Sheet: rep1
2018-06-22
	raw data
	blank	610	612	597	592	574	570	585	606	576	545	580	581	568	563	568	580	571	555	542	580	571	571	556	571	569	573	549	571	576	544	564	570	546	546	579	559	558	553	569	575	606	581	569	572	573	569	573	576
	wt OG only	237889	233917	229923	224815	223240	224544	225503	225479	225769	226182	227089	226472	226545	226566	226404	225697	226234	226292	226460	226537	225693	226537	225919	226837	226968	227450	227395	227151	227059	226751	227740	227552	227040	227284	227854	227446	227607	227766	227631	227574	227678	228287	227804	228906	228632	228949	228135	229437
	wt TAM	16118	16110	16086	15966	15770	15698	15402	15388	15235	15384	15572	15543	15569	15605	15535	15595	15831	15654	15485	15803	15701	15799	15717	15577	15760	15666	15659	15619	15618	15595	15705	15648	15627	15496	15589	15582	15623	15678	15577	15470	15575	15650	15633	15708	15564	15633	15655	15554
	wt TAM, 50 uM BiP, 1.25 uM J4	20196	22087	23953	25160	26711	27906	29137	30285	31186	31933	32758	33336	34092	34419	35517	35857	36460	37358	38001	38513	39110	39849	40340	41265	41840	42586	43205	43885	44505	45173	46110	46849	47293	47973	48764	49113	50205	50487	51742	52283	52456	53361	54127	54942	55482	56500	57065	57892
	wt TAM, 50 uM BiP, 1.25 uM J domain	18592	18862	19252	19654	20192	20394	20799	21187	21544	21990	22449	22665	23119	23155	23651	23686	24083	24407	24482	24823	24902	25138	25097	25264	25407	25616	25632	25826	25716	26130	26115	25883	26169	26242	26342	26090	26341	26605	26933	26697	26772	26871	27028	27382	27260	27128	26888	27078
	∆∆ TAM	12750	12507	12783	12523	12609	12492	12377	12509	12526	12598	12570	12663	12766	12704	12759	12755	12748	12891	12818	12624	12772	12857	12824	12941	12885	12878	12815	12813	12950	12836	13057	12992	12817	12832	12982	12896	12895	12938	12892	13018	12852	12906	13023	12983	12982	13023	12977	13097
	∆∆ TAM, 50 uM BiP, 1.25 uM J4	16251	17303	18599	19074	19730	20474	20921	21788	22077	22367	22843	23155	23614	23982	24272	24593	24864	25196	25520	25784	26232	26617	26431	27188	27491	27931	28158	28244	28847	28978	29499	29819	30026	30259	30494	30710	31485	31766	32342	32693	32859	33389	34155	34385	34775	35352	35849	36427
	∆∆ TAM, 50 uM BiP, 1.25 uM J domain	14938	15009	15222	15162	15332	15322	15636	15716	15857	16028	16063	16054	16172	16149	16311	16274	16462	16577	16441	16623	16608	16735	16800	16753	16976	16815	16984	16955	17059	16970	17251	17059	17076	17297	17318	17386	17410	17433	17523	17635	17704	17624	17572	17600	17511	17623	17540	17814
	time (min)	0	0.5	1	1.5	2	2.5	3	3.5	4	4.5	5	5.5	6	6.5	7	7.5	8	8.5	9	9.5	10	10.5	11	11.5	12	12.5	13	13.5	14	14.5	15	15.5	16	16.5	17	17.5	18	18.5	19	19.5	20	20.5	21	21.5	22	22.5	23	23.5
	corrected by blank
	wt OG only	237279	233305	229326	224223	222666	223974	224918	224873	225193	225637	226509	225891	225977	226003	225836	225117	225663	225737	225918	225957	225122	225966	225363	226266	226399	226877	226846	226580	226483	226207	227176	226982	226494	226738	227275	226887	227049	227213	227062	226999	227072	227706	227235	228334	228059	228380	227562	228861
	wt TAM	15508	15498	15489	15374	15196	15128	14817	14782	14659	14839	14992	14962	15001	15042	14967	15015	15260	15099	14943	15223	15130	15228	15161	15006	15191	15093	15110	15048	15042	15051	15141	15078	15081	14950	15010	15023	15065	15125	15008	14895	14969	15069	15064	15136	14991	15064	15082	14978
	wt TAM, 50 uM BiP, 1.25 uM J4	19586	21475	23356	24568	26137	27336	28552	29679	30610	31388	32178	32755	33524	33856	34949	35277	35889	36803	37459	37933	38539	39278	39784	40694	41271	42013	42656	43314	43929	44629	45546	46279	46747	47427	48185	48554	49647	49934	51173	51708	51850	52780	53558	54370	54909	55931	56492	57316
	wt TAM, 50 uM BiP, 1.25 uM J domain	17982	18250	18655	19062	19618	19824	20214	20581	20968	21445	21869	22084	22551	22592	23083	23106	23512	23852	23940	24243	24331	24567	24541	24693	24838	25043	25083	25255	25140	25586	25551	25313	25623	25696	25763	25531	25783	26052	26364	26122	26166	26290	26459	26810	26687	26559	26315	26502
	∆∆ TAM	12140	11895	12186	11931	12035	11922	11792	11903	11950	12053	11990	12082	12198	12141	12191	12175	12177	12336	12276	12044	12201	12286	12268	12370	12316	12305	12266	12242	12374	12292	12493	12422	12271	12286	12403	12337	12337	12385	12323	12443	12246	12325	12454	12411	12409	12454	12404	12521
	∆∆ TAM, 50 uM BiP, 1.25 uM J4	15641	16691	18002	18482	19156	19904	20336	21182	21501	21822	22263	22574	23046	23419	23704	24013	24293	24641	24978	25204	25661	26046	25875	26617	26922	27358	27609	27673	28271	28434	28935	29249	29480	29713	29915	30151	30927	31213	31773	32118	32253	32808	33586	33813	34202	34783	35276	35851
	∆∆ TAM, 50 uM BiP, 1.25 uM J domain	14328	14397	14625	14570	14758	14752	15051	15110	15281	15483	15483	15473	15604	15586	15743	15694	15891	16022	15899	16043	16037	16164	16244	16182	16407	16242	16435	16384	16483	16426	16687	16489	16530	16751	16739	16827	16852	16880	16954	17060	17098	17043	17003	17028	16938	17054	16967	17238
[truncated: 274 more columns]

## Sheet: rep2
2019-06-23
	raw data
	blank	502	492	497	497	481	494	478	465	485	471	469	479	473	488	467	477	490	464	508	477	474	464	472	495	472	469	488	470	452	475	465	449	479	468	462	489	471	501	470	476	436	470	467	480	499	473	487	491
	wt OG only	195098	193840	194999	191883	190250	190758	190866	189987	189897	189288	188568	188512	188307	187734	187872	188069	187970	188604	188984	188519	188767	189261	188421	188295	188577	188842	189809	188627	188293	188743	188565	188765	189706	189048	189753	188929	189293	188981	189209	189046	189373	189047	189794	189968	189586	189685	189828	190410
	wt TAM	15718	15406	15563	15324	15078	15043	15011	14851	14824	14792	14930	14730	14812	14887	14915	14918	14795	14865	14889	14805	14959	14892	14762	14801	14714	14715	14686	14756	14942	14720	14770	14743	14728	14817	14669	14818	14557	14803	14708	14812	14703	14790	14908	14855	14783	14739	14756	14707
	wt TAM, 50 uM BiP, 1.25 uM ERdj4	20186	22474	24186	25838	27156	28350	29429	30312	31145	31959	32592	33216	33896	34336	35189	35777	36527	36813	37368	38233	38732	39152	40075	40782	41415	42029	42681	43426	43931	45044	45106	45920	46870	47458	48264	48977	49424	50182	50671	51282	51959	52713	53568	54028	54286	54647	55829	56701
	∆∆ TAM	11147	11280	11160	11154	11042	11073	11026	11001	11023	10902	10865	11005	10830	10847	10919	10858	10782	10952	10922	10981	10907	11074	10970	10837	10982	10983	10735	11022	10968	10883	10997	11073	11053	10991	10915	10982	10962	11037	10938	10842	10932	10883	11008	11118	11017	10921	10933	10999
	∆∆ TAM, 50 uM BiP, 1.25 uM ERdj4	14924	15982	16706	17540	18147	18702	19254	19546	19854	20214	20442	20860	21032	21271	21676	21988	22140	22539	22727	22977	23401	23913	23876	24271	24667	24965	25045	25363	25858	25957	26213	26589	26684	27510	27566	27854	28129	28386	28584	29249	29442	29811	29998	30706	30753	31021	31214	31675
	time (min)	0	0.5	1	1.5	2	2.5	3	3.5	4	4.5	5	5.5	6	6.5	7	7.5	8	8.5	9	9.5	10	10.5	11	11.5	12	12.5	13	13.5	14	14.5	15	15.5	16	16.5	17	17.5	18	18.5	19	19.5	20	20.5	21	21.5	22	22.5	23	23.5
	corrected by blank
	wt OG only	194596	193348	194502	191386	189769	190264	190388	189522	189412	188817	188099	188033	187834	187246	187405	187592	187480	188140	188476	188042	188293	188797	187949	187800	188105	188373	189321	188157	187841	188268	188100	188316	189227	188580	189291	188440	188822	188480	188739	188570	188937	188577	189327	189488	189087	189212	189341	189919
	wt TAM	15216	14914	15066	14827	14597	14549	14533	14386	14339	14321	14461	14251	14339	14399	14448	14441	14305	14401	14381	14328	14485	14428	14290	14306	14242	14246	14198	14286	14490	14245	14305	14294	14249	14349	14207	14329	14086	14302	14238	14336	14267	14320	14441	14375	14284	14266	14269	14216
	wt TAM, 50 uM BiP, 1.25 uM ERdj4	19684	21982	23689	25341	26675	27856	28951	29847	30660	31488	32123	32737	33423	33848	34722	35300	36037	36349	36860	37756	38258	38688	39603	40287	40943	41560	42193	42956	43479	44569	44641	45471	46391	46990	47802	48488	48953	49681	50201	50806	51523	52243	53101	53548	53787	54174	55342	56210
	∆∆ TAM	10645	10788	10663	10657	10561	10579	10548	10536	10538	10431	10396	10526	10357	10359	10452	10381	10292	10488	10414	10504	10433	10610	10498	10342	10510	10514	10247	10552	10516	10408	10532	10624	10574	10523	10453	10493	10491	10536	10468	10366	10496	10413	10541	10638	10518	10448	10446	10508
	∆∆ TAM, 50 uM BiP, 1.25 uM ERdj4	14422	15490	16209	17043	17666	18208	18776	19081	19369	19743	19973	20381	20559	20783	21209	21511	21650	22075	22219	22500	22927	23449	23404	23776	24195	24496	24557	24893	25406	25482	25748	26140	26205	27042	27104	27365	27658	27885	28114	28773	29006	29341	29531	30226	30254	30548	30727	31184
[truncated: 952 more columns]

## Sheet: rep3
2019-06-23
	raw data
	blank	499	513	478	473	468	458	481	474	448	443	463	462	507	484	482	481	508	497	471	509	489	505	498	479	473	507	474	481	445	508	493	481	503	450	468	490	480	474	427	473	468	477	471	490	501	504	521	538
	wt OG only	199825	196938	196686	193483	191417	190521	191303	190118	188958	190118	189788	189388	188770	187676	188821	184701	187694	188680	187901	188272	188164	189066	188698	188361	188866	188159	188963	188758	189052	188952	188667	188610	189343	188879	189218	189154	189041	189073	188706	189133	188970	189375	190083	189947	189903	189650	190092	190729
	wt TAM	15489	15773	15478	15458	15181	15245	15035	15264	14931	15140	14977	15141	15061	14921	14809	14943	15070	15002	14901	14979	15212	15057	15002	14959	14840	14990	14907	14927	14942	14948	14946	14960	14873	14778	14979	15026	15025	14788	14785	14911	14808	14907	14867	14891	14786	14853	14897	14924
	wt TAM, 50 uM BiP, 1.25 uM ERdj4	19296	21220	23147	24638	26246	27654	28485	29669	30583	31461	32091	33092	33863	34347	34943	35779	36273	36993	37476	38117	38975	39798	40412	41121	41945	42786	43483	43778	44597	45343	46137	46782	47474	48099	48763	49535	50160	50810	51416	52293	53142	53712	54565	55545	56035	56793	57382	58308
	∆∆ TAM	11319	11336	11418	11245	11274	11249	11274	11164	11100	11119	11077	11049	11139	11038	11060	10926	10999	10820	11050	11047	10984	11064	11100	11027	11102	10955	11045	11046	11057	11185	10984	11077	11156	11115	10988	11135	11062	11003	11029	10968	11126	10996	11303	11099	10963	11047	11049	11044
	∆∆ TAM, 50 uM BiP, 1.25 uM ERdj4	13882	14759	15824	16621	17433	18092	18476	18962	19478	19842	20388	20738	20854	21037	21472	21871	21948	22162	22586	23025	23062	23581	23775	24063	24517	24577	24859	25430	25691	25974	26204	26631	26912	27227	27561	27862	28252	28510	28968	29348	29569	30170	30351	30790	31139	31607	31972	32297
	time (min)	0	0.5	1	1.5	2	2.5	3	3.5	4	4.5	5	5.5	6	6.5	7	7.5	8	8.5	9	9.5	10	10.5	11	11.5	12	12.5	13	13.5	14	14.5	15	15.5	16	16.5	17	17.5	18	18.5	19	19.5	20	20.5	21	21.5	22	22.5	23	23.5
	corrected by blank
	wt OG only	199326	196425	196208	193010	190949	190063	190822	189644	188510	189675	189325	188926	188263	187192	188339	184220	187186	188183	187430	187763	187675	188561	188200	187882	188393	187652	188489	188277	188607	188444	188174	188129	188840	188429	188750	188664	188561	188599	188279	188660	188502	188898	189612	189457	189402	189146	189571	190191
	wt TAM	14990	15260	15000	14985	14713	14787	14554	14790	14483	14697	14514	14679	14554	14437	14327	14462	14562	14505	14430	14470	14723	14552	14504	14480	14367	14483	14433	14446	14497	14440	14453	14479	14370	14328	14511	14536	14545	14314	14358	14438	14340	14430	14396	14401	14285	14349	14376	14386
	wt TAM, 50 uM BiP, 1.25 uM ERdj4	18797	20707	22669	24165	25778	27196	28004	29195	30135	31018	31628	32630	33356	33863	34461	35298	35765	36496	37005	37608	38486	39293	39914	40642	41472	42279	43009	43297	44152	44835	45644	46301	46971	47649	48295	49045	49680	50336	50989	51820	52674	53235	54094	55055	55534	56289	56861	57770
	∆∆ TAM	10820	10823	10940	10772	10806	10791	10793	10690	10652	10676	10614	10587	10632	10554	10578	10445	10491	10323	10579	10538	10495	10559	10602	10548	10629	10448	10571	10565	10612	10677	10491	10596	10653	10665	10520	10645	10582	10529	10602	10495	10658	10519	10832	10609	10462	10543	10528	10506
	∆∆ TAM, 50 uM BiP, 1.25 uM ERdj4	13383	14246	15346	16148	16965	17634	17995	18488	19030	19399	19925	20276	20347	20553	20990	21390	21440	21665	22115	22516	22573	23076	23277	23584	24044	24070	24385	24949	25246	25466	25711	26150	26409	26777	27093	27372	27772	28036	28541	28875	29101	29693	29880	30300	30638	31103	31451	31759
[truncated: 952 more columns]
