# Supplementary material for: Unstructured regions in IRE1α specify BiP-mediated destabilisation of the luminal domain dimer and repression of the UPR
Source: eLife. 2019 Dec 24;8:e50793. doi: 10.7554/eLife.50793 (PMC6996924; doi:10.7554/eLife.50793)
Supplement: Figure 6—figure supplement 1—source data 1. [file elife-50793-fig6-figsupp1-data1.xlsx]

## Sheet: Data
IRE1 wt vs. IRE1 ∆∆
		wt				∆∆
	1	14/12/18				1	2019-01-02
	2	2019-08-01				2	17/02/19
	3	2019-11-01				3	20.02.2019
									%Hx																				Deuterons																				Δ Deuterons
									ex IRE1 wt 30s					ex IRE1 dd 30s					ex IRE1 wt 300s					ex IRE1 dd 300s					ex IRE1 wt 30s					ex IRE1 dd 30s					ex IRE1 wt 300s					ex IRE1 dd 300s					ex IRE1 dd 30s
		Comment	#	Peptide Sequence	Peptide	m/z	charge	#H	1	2	3	Average	Error	1	2	3	Average	Error	1	2	3	Average	Error	1	2	3	Average	Error	1	2	3	Average	Error	1	2	3	Average	Error	1	2	3	Average	Error	1	2	3	Average	Error	Average
			1	STSTVTLPETLL	1: 1-12	631.345	2	10	0.864834	0.864295	0.864732	0.86462	0.000135182	0.872471	0.893122	0.87908	0.881557	0.00497153	0.917138	0.915443	0.916226	0.916269	0.000399789	0.912551	0.926373	0.915394	0.918106	0.00344088	8.64834	8.64295	8.64732	8.6462	0.00135182	8.72471	8.93122	8.7908	8.81557	0.0497153	9.17138	9.15443	9.16226	9.16269	0.00399789	9.12551	9.26373	9.15394	9.18106	0.0344088	0.169371
			2	FVSTLDGSL	2: 13-21	938.478	1	8	0.137779	0.150919	0.130235	0.139644	0.0049345	0.149253	0.175583	0.145326	0.156721	0.00775594	0.273931	0.280115	0.270453	0.274833	0.00230679	0.281562	0.310485	0.286045	0.292697	0.00733844	1.10223	1.20735	1.04188	1.11715	0.039476	1.19402	1.40466	1.16261	1.25377	0.0620475	2.19145	2.24092	2.16362	2.19866	0.0184543	2.2525	2.48388	2.28836	2.34158	0.0587075	0.136611
			3	HAVSKRTGSIKWTL	3: 22-35	396.730	4	13	0.445457	0.450172	0.440901	0.44551	0.00218526	0.451375	0.447411	0.460332	0.453039	0.0031203	0.454481	0.456312	0.455125	0.455306	0.000437908	0.462308	0.458244	0.464631	0.461727	0.00152399	5.79094	5.85223	5.73171	5.79163	0.0284083	5.86788	5.81635	5.98432	5.88951	0.0405639	5.90825	5.93205	5.91663	5.91898	0.00569281	6.01	5.95717	6.0402	6.00246	0.0198119	0.0978842
			5	LPDPNDGSL	5: 53-61	927.435	1	6	0.0952821	0.0982465	0.0947211	0.0960832	0.000892996	0.113107	0.0991978	0.0984974	0.103601	0.00388435	0.197342	0.196126	0.19996	0.197809	0.000923509	0.221321	0.203396	0.201774	0.20883	0.0051135	0.571692	0.589479	0.568327	0.576499	0.00535798	0.67864	0.595187	0.590984	0.621604	0.0233061	1.18405	1.17676	1.19976	1.18686	0.00554105	1.32792	1.22038	1.21064	1.25298	0.030681	0.0451044
			6	YTLGSKNNEGLTKLPFTIPEL	6: 62-82	779.087	3	19	0.483084	0.493886	0.486174	0.487715	0.00262243	0.507984	0.48211	0.510528	0.500207	0.00741243	0.570357	0.579735	0.569358	0.57315	0.00269863	0.589245	0.567018	0.577624	0.577962	0.00524056	9.1786	9.38383	9.2373	9.26658	0.0498262	9.6517	9.16009	9.70003	9.50394	0.140836	10.8368	11.015	10.8178	10.8899	0.0512741	11.1956	10.7734	10.9749	10.9813	0.0995706	0.237365
			7	LTKLPFTIPEL	7: 72-82	636.380	2	8	0.147296	0.148314	0.150073	0.148561	0.000662233	0.155276	0.157096	0.160564	0.157645	0.00126635	0.231655	0.240405	0.241326	0.237795	0.00251615	0.24091	0.235437	0.236392	0.23758	0.00137811	1.17837	1.18651	1.20058	1.18849	0.00529786	1.24221	1.25677	1.28451	1.26116	0.0101308	1.85324	1.92324	1.93061	1.90236	0.0201292	1.92728	1.8835	1.89114	1.90064	0.0110249	0.0726748
			8	VQASPSRSSDGIL	8: 83-95	1316.68	1	11	0.43254	0.445178	0.431395	0.436371	0.00360564	0.43648	0.436442	0.445408	0.439443	0.00243503	0.671161	0.674753	0.676502	0.674139	0.00128351	0.672571	0.675842	0.673913	0.674109	0.000774917	4.75794	4.89696	4.74535	4.80008	0.0396621	4.80128	4.80087	4.89949	4.83388	0.0267854	7.38277	7.42228	7.44152	7.41553	0.0141187	7.39829	7.43426	7.41304	7.41519	0.00852409	0.0337938
			9	YMGKKQDIW	9: 96-104	390.199	3	8	0.0852524	0.0870887	0.0812473	0.0845295	0.00140809	0.0825139	0.080493	0.0823035	0.0817701	0.00052375	0.276389	0.285428	0.290079	0.283965	0.00328156	0.275644	0.265793	0.270541	0.270659	0.00232228	0.682019	0.696709	0.649979	0.676236	0.0112647	0.660112	0.643944	0.658428	0.654161	0.00419	2.21111	2.28342	2.32063	2.27172	0.0262525	2.20515	2.12635	2.16433	2.16528	0.0185782	-0.0220748
			10	YVIDLL	10: 105-110	735.424	1	5	0.0542887	0.0631446	0.0634168	0.0602834	0.00244816	0.0681549	0.0794046	0.0621392	0.0698995	0.00413136	0.318265	0.336497	0.346804	0.333855	0.00681238	0.347652	0.348501	0.327302	0.341152	0.00565749	0.271444	0.315723	0.317084	0.301417	0.0122408	0.340774	0.397023	0.310696	0.349498	0.0206568	1.59133	1.68248	1.73402	1.66928	0.0340619	1.73826	1.74251	1.63651	1.70576	0.0282875	0.0480807
			11	LTGEKQQTLSSA	11: 110-121	631.832	2	11	0.776526	0.785433	0.778204	0.780054	0.00223108	0.776809	0.766145	0.783848	0.775601	0.00420178	0.937476	0.943084	0.929904	0.936821	0.00311824	0.930668	0.91583	0.92322	0.923239	0.00349729	8.54179	8.63976	8.56024	8.5806	0.0245418	8.5449	8.42759	8.62233	8.53161	0.0462196	10.3122	10.3739	10.2289	10.305	0.0343007	10.2373	10.0741	10.1554	10.1556	0.0384702	-0.0489897
			13	ADSLSPSTSLL	13: 123-133	1090.56	1	9	0.798036	0.799046	0.794864	0.797315	0.00102866	0.78143	0.770039	0.782084	0.777851	0.003193	0.808161	0.812005	0.806419	0.808862	0.00134747	0.791316	0.797533	0.78939	0.792746	0.00200629	7.18232	7.19141	7.15378	7.17584	0.00925797	7.03287	6.93035	7.03875	7.00066	0.028737	7.27345	7.30805	7.25777	7.27975	0.0121272	7.12184	7.1778	7.10451	7.13472	0.0180567	-0.175178
			14	LYLGRTEYTITM	14: 133-144	730.874	2	11	0.01113	0.0106081	0.0122173	0.0113185	0.00038701	0.0141703	0.0129894	0.0143049	0.0138216	0.000341214	0.0269339	0.0278311	0.0293992	0.0280547	0.000588208	0.033013	0.0299099	0.0299843	0.0309691	0.000834612	0.12243	0.116689	0.13439	0.124503	0.00425711	0.155874	0.142883	0.157354	0.152037	0.00375335	0.296273	0.306142	0.323391	0.308602	0.00647029	0.363143	0.329009	0.329827	0.34066	0.00918073	0.0275338
			15	MYDTKTRE	15: 144-151	522.242	2	7	0.542662	0.570995	0.543684	0.552447	0.00757613	0.562125	0.544664	0.58032	0.56237	0.00840491	0.849278	0.836156	0.815489	0.833641	0.00803009	0.824233	0.825807	0.835884	0.828641	0.00297999	3.79863	3.99697	3.80579	3.86713	0.0530329	3.93487	3.81265	4.06224	3.93659	0.0588344	5.94494	5.85309	5.70842	5.83549	0.0562106	5.76963	5.78065	5.85119	5.80049	0.0208599	0.0694586
			16	LRWNATYF	16: 152-159	535.772	2	7	0.197583	0.206664	0.203856	0.202701	0.00219191	0.209336	0.208393	0.21407	0.2106	0.001434	0.332025	0.333165	0.332371	0.33252	0.000275384	0.33579	0.330135	0.329493	0.331806	0.00163366	1.38308	1.44665	1.42699	1.41891	0.0153434	1.46535	1.45875	1.49849	1.4742	0.010038	2.32418	2.33215	2.32659	2.32764	0.00192769	2.35053	2.31094	2.30645	2.32264	0.0114356	0.0552915
			17	AASLPEDDVD	17: 162-171	1031.447	1	8	0.94038	0.93481	0.935891	0.937027	0.00139242	0.922707	0.94225	0.926461	0.930473	0.00488898	0.934627	0.911927	0.944109	0.930221	0.00779586	0.935302	0.958395	0.910258	0.934652	0.0113491	7.52304	7.47848	7.48713	7.49622	0.0111394	7.38165	7.538	7.41168	7.44378	0.0391119	7.47702	7.29541	7.55287	7.44177	0.0623669	7.48242	7.66716	7.28207	7.47721	0.0907924	-0.0524354
			18	YKMSHFVSNGDGL	18: 172-184	727.837	2	12	0.404407	0.409996	0.407055	0.407153	0.00131788	0.407677	0.4057	0.414312	0.409229	0.00212654	0.478299	0.477429	0.479254	0.478327	0.000430299	0.477792	0.485324	0.475324	0.47948	0.00245553	4.85289	4.91995	4.88466	4.88583	0.0158145	4.89212	4.8684	4.97174	4.91075	0.0255185	5.73958	5.72915	5.75105	5.73993	0.00516359	5.73351	5.82388	5.70389	5.75376	0.0294664	0.0249212
			19	VVTVDSESGDVLW	19: 185-197	703.343	2	12	0.370346	0.37725	0.380537	0.376044	0.00245197	0.38432	0.356033	0.381456	0.373937	0.00734001	0.440048	0.433088	0.433605	0.43558	0.00182794	0.438783	0.432181	0.406638	0.425867	0.00800316	4.44415	4.527	4.56644	4.51253	0.0294237	4.61184	4.2724	4.57748	4.48724	0.0880802	5.28058	5.19706	5.20326	5.22697	0.0219352	5.2654	5.18618	4.87965	5.11041	0.0960379	-0.0252896
			20	WIQNYASPVVAF	20: 197-208	697.856	2	10	0.204368	0.202192	0.202894	0.203151	0.000523446	0.20772	0.21472	0.204375	0.208938	0.00248861	0.251052	0.250082	0.252444	0.251193	0.000559615	0.254189	0.253787	0.241082	0.249686	0.00351381	2.04368	2.02192	2.02894	2.03151	0.00523446	2.0772	2.1472	2.04375	2.08938	0.0248861	2.51052	2.50082	2.52444	2.51193	0.00559615	2.54189	2.53787	2.41082	2.49686	0.0351381	0.0578677
			21	YVWQREGL	21: 209-216	1050.54	1	7	0.607033	0.61945	0.621823	0.616102	0.00374451	0.620236	0.570201	0.595157	0.595198	0.0117935	0.777995	0.764437	0.775747	0.772727	0.0034254	0.77015	0.759902	0.755032	0.761695	0.00363787	4.24923	4.33615	4.35276	4.31271	0.0262116	4.34165	3.9914	4.1661	4.16638	0.0825548	5.44597	5.35106	5.43023	5.40909	0.0239778	5.39105	5.31932	5.28522	5.33186	0.0254651	-0.146328
			22	RKVMHINV	22: 217-224	332.864	3	7	0.273467	0.281788	0.278566	0.27794	0.00197786	0.29028	0.275606	0.29154	0.285809	0.00417582	0.375273	0.375134	0.379422	0.37661	0.00114867	0.383398	0.373325	0.379547	0.378757	0.00239613	1.91427	1.97251	1.94996	1.94558	0.013845	2.03196	1.92924	2.04078	2.00066	0.0292307	2.62691	2.62594	2.65596	2.63627	0.00804067	2.68379	2.61327	2.65683	2.6513	0.0167729	0.05508
			24	LRYLTF	24: 229-234	406.735	2	5	0.743402	0.733068	0.733565	0.736678	0.00274732	0.73554	0.73168	0.743904	0.737042	0.00294571	0.923736	0.917951	0.92159	0.921092	0.00137862	0.928441	0.91749	0.906958	0.91763	0.00506398	3.71701	3.66534	3.66783	3.68339	0.0137366	3.6777	3.6584	3.71952	3.68521	0.0147285	4.61868	4.58976	4.60795	4.60546	0.00689311	4.64221	4.58745	4.53479	4.58815	0.0253199	0.00181687
			25	MSGEVGRITKWKYPFPKETEA	25: 235-255	491.656	5	18	0.959599	0.950827	0.943916	0.951447	0.00370526	0.929475	0.914782	0.941192	0.928483	0.00623792	0.97148	0.942373	0.942149	0.952	0.00795249	0.931637	0.903883	0.943387	0.926302	0.00956255	17.2728	17.1149	16.9905	17.126	0.0666946	16.7306	16.4661	16.9415	16.7127	0.112283	17.4866	16.9627	16.9587	17.136	0.143145	16.7695	16.2699	16.981	16.6734	0.172126	-0.413351
			26	KSKLTPTL	26: 256-263	444.28	2	6	0.396076	0.398665	0.395024	0.396589	0.000883221	0.39424	0.378616	0.397555	0.390137	0.00476791	0.778603	0.78631	0.782322	0.782412	0.00181698	0.76322	0.762183	0.752414	0.759272	0.00281046	2.37646	2.39199	2.37015	2.37953	0.00529933	2.36544	2.2717	2.38533	2.34082	0.0286075	4.67162	4.71786	4.69393	4.69447	0.0109019	4.57932	4.5731	4.51448	4.55563	0.0168628	-0.0387093
			27	YVGKYSTSL	27: 264-272	1017.53	1	8	0.644782	0.650112	0.64574	0.646878	0.00133943	0.658168	0.657489	0.670627	0.662095	0.0034869	0.892763	0.884652	0.888291	0.888569	0.00191533	0.87654	0.86906	0.881314	0.875638	0.0029116	5.15826	5.2009	5.16592	5.17502	0.0107155	5.26534	5.25991	5.36501	5.29676	0.0278952	7.14211	7.07721	7.10632	7.10855	0.0153227	7.01232	6.95248	7.05051	7.0051	0.0232928	0.121732
			28	YASPSM	28: 273-278	655.273	1	4	0.133838	0.131689	0.124735	0.130087	0.00224284	0.102128	0.11235	0.113492	0.109323	0.0029498	0.685331	0.678328	0.675617	0.679759	0.00236294	0.615307	0.634064	0.634512	0.627961	0.00516702	0.53535	0.526755	0.498941	0.520349	0.00897137	0.408512	0.449401	0.453967	0.437294	0.0117992	2.74133	2.71331	2.70247	2.71904	0.00945175	2.46123	2.53626	2.53805	2.51184	0.0206681	-0.0830554
			29	VHEGVAVVPRGSTL	29: 279-292	474.268	3	12	0.817301	0.831296	0.820923	0.823173	0.00342426	#DIV/0!	#DIV/0!	#DIV/0!	#DIV/0!	#DIV/0!	0.938872	0.939068	0.928632	0.935524	0.00281414	#DIV/0!	#DIV/0!	#DIV/0!	#DIV/0!	#DIV/0!	9.80761	9.97555	9.85108	9.87808	0.0410911	#DIV/0!	#DIV/0!	#DIV/0!	#DIV/0!	#DIV/0!	11.2665	11.2688	11.1436	11.2263	0.0337697	#DIV/0!	#DIV/0!	#DIV/0!	#DIV/0!	#DIV/0!	#DIV/0!
			30	PLLEGPQTDGVTIGDKGES	30: 293-311	956.978	2	16	0.965904	0.952313	0.944908	0.954375	0.00501979	#DIV/0!	#DIV/0!	#DIV/0!	#DIV/0!	#DIV/0!	0.96641	0.957257	0.945505	0.956391	0.00494005	#DIV/0!	#DIV/0!	#DIV/0!	#DIV/0!	#DIV/0!	15.4545	15.237	15.1185	15.27	0.0803167	#DIV/0!	#DIV/0!	#DIV/0!	#DIV/0!	#DIV/0!	15.4626	15.3161	15.1281	15.3023	0.0790407	#DIV/0!	#DIV/0!	#DIV/0!	#DIV/0!	#DIV/0!	#DIV/0!
			31	VKFDPGLKSKNKLNYLRN	31: 319-336	534.307	4	16	0.941279	0.951897	0.932963	0.942047	0.00447364	0.921216	0.917579	0.92833	0.922375	0.00257798	0.932541	0.947747	0.927738	0.936009	0.0049242	0.925448	0.92302	0.94281	0.930426	0.00508801	15.0605	15.2304	14.9274	15.0727	0.0715782	14.7395	14.6813	14.8533	14.758	0.0412477	14.9206	15.164	14.8438	14.9761	0.0787872	14.8072	14.7683	15.085	14.8868	0.0814082	-0.314746
			32	LLIGHHETPLSA	32: 339-350	644.354	2	10	0.664127	0.671024	0.661671	0.665607	0.00228585	0.70888	0.70637	0.70637	0.707207	0.000683005	0.932196	0.925914	0.92715	0.92842	0.00156896	0.913706	0.915187	0.915187	0.914693	0.000402932	6.64127	6.71024	6.61671	6.65607	0.0228585	7.0888	7.0637	7.0637	7.07207	0.00683005	9.32196	9.25914	9.2715	9.2842	0.0156896	9.13706	9.15187	9.15187	9.14693	0.00402932	0.415997
			33	IGHHETPLSASTKM	33: 341-354	503.588	3	12	0.882616	0.893637	0.877656	0.884636	0.0038559	0.877033	0.888436	0.89991	0.88846	0.00539223	0.943579	0.95448	0.935385	0.944481	0.00451562	0.938235	0.962198	0.947467	0.9493	0.00569748	10.5914	10.7236	10.5319	10.6156	0.0462708	10.5244	10.6612	10.7989	10.6615	0.0647067	11.3229	11.4538	11.2246	11.3338	0.0541874	11.2588	11.5464	11.3696	11.3916	0.0683698	0.045877
			34	LERFPNNLPKHRENVIPADSEKKSFE	34: 355-380	516.606	6	23	0.939285	0.953303	0.922988	0.938525	0.00715211	#DIV/0!	#DIV/0!	#DIV/0!	#DIV/0!	#DIV/0!	0.942572	0.950949	0.927235	0.940252	0.00566918	#DIV/0!	#DIV/0!	#DIV/0!	#DIV/0!	#DIV/0!	21.6036	21.926	21.2287	21.5861	0.164499	#DIV/0!	#DIV/0!	#DIV/0!	#DIV/0!	#DIV/0!	21.6791	21.8718	21.3264	21.6258	0.130391	#DIV/0!	#DIV/0!	#DIV/0!	#DIV/0!	#DIV/0!	#DIV/0!
			35	VDQTSENAPTTVSRD	35: 386-400	810.376	2	13	0.938891	0.951737	0.935974	0.942201	0.00395346	#DIV/0!	#DIV/0!	#DIV/0!	#DIV/0!	#DIV/0!	0.940031	0.969596	0.941836	0.950488	0.00781262	#DIV/0!	#DIV/0!	#DIV/0!	#DIV/0!	#DIV/0!	12.2056	12.3726	12.1677	12.2486	0.051395	#DIV/0!	#DIV/0!	#DIV/0!	#DIV/0!	#DIV/0!	12.2204	12.6048	12.2439	12.3563	0.101564	#DIV/0!	#DIV/0!	#DIV/0!	#DIV/0!	#DIV/0!	#DIV/0!
			36	VDQTSENAPTTVSRDVEEKPAHAPARPEAPVDSM	36: 386-419	727.149	5	32	0.949994	0.957145	0.93677	0.947969	0.00487302	#DIV/0!	#DIV/0!	#DIV/0!	#DIV/0!	#DIV/0!	0.946894	0.95997	0.938789	0.948551	0.00503818	#DIV/0!	#DIV/0!	#DIV/0!	#DIV/0!	#DIV/0!	30.3998	30.6286	29.9766	30.335	0.155937	#DIV/0!	#DIV/0!	#DIV/0!	#DIV/0!	#DIV/0!	30.3006	30.7191	30.0412	30.3536	0.161222	#DIV/0!	#DIV/0!	#DIV/0!	#DIV/0!	#DIV/0!	#DIV/0!
			37	VEEKPAHAPARPEAPVDSML	37: 401-420	536.774	4	15	0.955503	0.951879	0.942755	0.950046	0.00309647	#DIV/0!	#DIV/0!	#DIV/0!	#DIV/0!	#DIV/0!	0.951932	0.945307	0.941604	0.946281	0.00246645	#DIV/0!	#DIV/0!	#DIV/0!	#DIV/0!	#DIV/0!	14.3325	14.2782	14.1413	14.2507	0.0464471	#DIV/0!	#DIV/0!	#DIV/0!	#DIV/0!	#DIV/0!	14.279	14.1796	14.1241	14.1942	0.0369967	#DIV/0!	#DIV/0!	#DIV/0!	#DIV/0!	#DIV/0!	#DIV/0!
[truncated: 3 more columns]

## Sheet: Tabelle1
		ex IRE1 wt 30s			ex IRE1 dd 30s			ex IRE1 wt 300s			ex IRE1 dd 300s
		1	2	3	1	2	3	1	2	3	1	2	3
	24-36	0.864834	0.864295	0.864732	0.872471	0.893122	0.87908	0.917138	0.915443	0.916226	0.912551	0.926373	0.915394
	37-45	0.137779	0.150919	0.130235	0.149253	0.175583	0.145326	0.273931	0.280115	0.270453	0.281562	0.310485	0.286045
	46-59	0.445457	0.450172	0.440901	0.451375	0.447411	0.460332	0.454481	0.456312	0.455125	0.462308	0.458244	0.464631
	77-85	0.0952821	0.0982465	0.0947211	0.113107	0.0991978	0.0984974	0.197342	0.196126	0.19996	0.221321	0.203396	0.201774
	86-106	0.483084	0.493886	0.486174	0.507984	0.48211	0.510528	0.570357	0.579735	0.569358	0.589245	0.567018	0.577624
	96-106	0.147296	0.148314	0.150073	0.155276	0.157096	0.160564	0.231655	0.240405	0.241326	0.24091	0.235437	0.236392
	107-119	0.43254	0.445178	0.431395	0.43648	0.436442	0.445408	0.671161	0.674753	0.676502	0.672571	0.675842	0.673913
	120-128	0.0852524	0.0870887	0.0812473	0.0825139	0.080493	0.0823035	0.276389	0.285428	0.290079	0.275644	0.265793	0.270541
	130-134	0.0542887	0.0631446	0.0634168	0.0681549	0.0794046	0.0621392	0.318265	0.336497	0.346804	0.347652	0.348501	0.327302
	134-145	0.776526	0.785433	0.778204	0.776809	0.766145	0.783848	0.937476	0.943084	0.929904	0.930668	0.91583	0.92322
	147-157	0.798036	0.799046	0.794864	0.78143	0.770039	0.782084	0.808161	0.812005	0.806419	0.791316	0.797533	0.78939
	157-168	0.01113	0.0106081	0.0122173	0.0141703	0.0129894	0.0143049	0.0269339	0.0278311	0.0293992	0.033013	0.0299099	0.0299843
	168-175	0.542662	0.570995	0.543684	0.562125	0.544664	0.58032	0.849278	0.836156	0.815489	0.824233	0.825807	0.835884
	176-183	0.197583	0.206664	0.203856	0.209336	0.208393	0.21407	0.332025	0.333165	0.332371	0.33579	0.330135	0.329493
	186-195	0.94038	0.93481	0.935891	0.922707	0.94225	0.926461	0.934627	0.911927	0.944109	0.935302	0.958395	0.910258
	196-208	0.404407	0.409996	0.407055	0.407677	0.4057	0.414312	0.478299	0.477429	0.479254	0.477792	0.485324	0.475324
	209-221	0.370346	0.37725	0.380537	0.38432	0.356033	0.381456	0.440048	0.433088	0.433605	0.438783	0.432181	0.406638
	221-232	0.204368	0.202192	0.202894	0.20772	0.21472	0.204375	0.251052	0.250082	0.252444	0.254189	0.253787	0.241082
	233-240	0.607033	0.61945	0.621823	0.620236	0.570201	0.595157	0.777995	0.764437	0.775747	0.77015	0.759902	0.755032
	241-248	0.273467	0.281788	0.278566	0.29028	0.275606	0.29154	0.375273	0.375134	0.379422	0.383398	0.373325	0.379547
	253-258	0.743402	0.733068	0.733565	0.73554	0.73168	0.743904	0.923736	0.917951	0.92159	0.928441	0.91749	0.906958
	259-279	0.959599	0.950827	0.943916	0.929475	0.914782	0.941192	0.97148	0.942373	0.942149	0.931637	0.903883	0.943387
	280-287	0.396076	0.398665	0.395024	0.39424	0.378616	0.397555	0.778603	0.78631	0.782322	0.76322	0.762183	0.752414
	288-296	0.644782	0.650112	0.64574	0.658168	0.657489	0.670627	0.892763	0.884652	0.888291	0.87654	0.86906	0.881314
	297-302	0.133838	0.131689	0.124735	0.102128	0.11235	0.113492	0.685331	0.678328	0.675617	0.615307	0.634064	0.634512
	303-316	0.817301	0.831296	0.820923	#DIV/0!	#DIV/0!	#DIV/0!	0.938872	0.939068	0.928632	#DIV/0!	#DIV/0!	#DIV/0!
	317-335	0.965904	0.952313	0.944908	#DIV/0!	#DIV/0!	#DIV/0!	0.96641	0.957257	0.945505	#DIV/0!	#DIV/0!	#DIV/0!
	343-360	0.941279	0.951897	0.932963	0.921216	0.917579	0.92833	0.932541	0.947747	0.927738	0.925448	0.92302	0.94281
	363-374	0.664127	0.671024	0.661671	0.70888	0.70637	0.70637	0.932196	0.925914	0.92715	0.913706	0.915187	0.915187
	365-378	0.882616	0.893637	0.877656	0.877033	0.888436	0.89991	0.943579	0.95448	0.935385	0.938235	0.962198	0.947467
	379-404	0.939285	0.953303	0.922988	#DIV/0!	#DIV/0!	#DIV/0!	0.942572	0.950949	0.927235	#DIV/0!	#DIV/0!	#DIV/0!
	410-424	0.938891	0.951737	0.935974	#DIV/0!	#DIV/0!	#DIV/0!	0.940031	0.969596	0.941836	#DIV/0!	#DIV/0!	#DIV/0!
	410-443	0.949994	0.957145	0.93677	#DIV/0!	#DIV/0!	#DIV/0!	0.946894	0.95997	0.938789	#DIV/0!	#DIV/0!	#DIV/0!
	425-444	0.955503	0.951879	0.942755	#DIV/0!	#DIV/0!	#DIV/0!	0.951932	0.945307	0.941604	#DIV/0!	#DIV/0!	#DIV/0!
		86.4834	86.4295	86.4732	87.2471	89.3122	87.908	91.7138	91.5443	91.6226	91.2551	92.6373	91.5394
		13.7779	15.0919	13.0235	14.9253	17.5583	14.5326	27.3931	28.0115	27.0453	28.1562	31.0485	28.6045
		44.5457	45.0172	44.0901	45.1375	44.7411	46.0332	45.4481	45.6312	45.5125	46.2308	45.8244	46.4631
		9.52821	9.82465	9.47211	11.3107	9.91978	9.84974	19.7342	19.6126	19.996	22.1321	20.3396	20.1774
		48.3084	49.3886	48.6174	50.7984	48.211	51.0528	57.0357	57.9735	56.9358	58.9245	56.7018	57.7624
		14.7296	14.8314	15.0073	15.5276	15.7096	16.0564	23.1655	24.0405	24.1326	24.091	23.5437	23.6392
		43.254	44.5178	43.1395	43.648	43.6442	44.5408	67.1161	67.4753	67.6502	67.2571	67.5842	67.3913
		8.52524	8.70887	8.12473	8.25139	8.0493	8.23035	27.6389	28.5428	29.0079	27.5644	26.5793	27.0541
		5.42887	6.31446	6.34168	6.81549	7.94046	6.21392	31.8265	33.6497	34.6804	34.7652	34.8501	32.7302
		77.6526	78.5433	77.8204	77.6809	76.6145	78.3848	93.7476	94.3084	92.9904	93.0668	91.583	92.322
		79.8036	79.9046	79.4864	78.143	77.0039	78.2084	80.8161	81.2005	80.6419	79.1316	79.7533	78.939
		1.113	1.06081	1.22173	1.41703	1.29894	1.43049	2.69339	2.78311	2.93992	3.3013	2.99099	2.99843
		54.2662	57.0995	54.3684	56.2125	54.4664	58.032	84.9278	83.6156	81.5489	82.4233	82.5807	83.5884
		19.7583	20.6664	20.3856	20.9336	20.8393	21.407	33.2025	33.3165	33.2371	33.579	33.0135	32.9493
		94.038	93.481	93.5891	92.2707	94.225	92.6461	93.4627	91.1927	94.4109	93.5302	95.8395	91.0258
		40.4407	40.9996	40.7055	40.7677	40.57	41.4312	47.8299	47.7429	47.9254	47.7792	48.5324	47.5324
		37.0346	37.725	38.0537	38.432	35.6033	38.1456	44.0048	43.3088	43.3605	43.8783	43.2181	40.6638
		20.4368	20.2192	20.2894	20.772	21.472	20.4375	25.1052	25.0082	25.2444	25.4189	25.3787	24.1082
		60.7033	61.945	62.1823	62.0236	57.0201	59.5157	77.7995	76.4437	77.5747	77.015	75.9902	75.5032
		27.3467	28.1788	27.8566	29.028	27.5606	29.154	37.5273	37.5134	37.9422	38.3398	37.3325	37.9547
		74.3402	73.3068	73.3565	73.554	73.168	74.3904	92.3736	91.7951	92.159	92.8441	91.749	90.6958
		95.9599	95.0827	94.3916	92.9475	91.4782	94.1192	97.148	94.2373	94.2149	93.1637	90.3883	94.3387
		39.6076	39.8665	39.5024	39.424	37.8616	39.7555	77.8603	78.631	78.2322	76.322	76.2183	75.2414
		64.4782	65.0112	64.574	65.8168	65.7489	67.0627	89.2763	88.4652	88.8291	87.654	86.906	88.1314
		13.3838	13.1689	12.4735	10.2128	11.235	11.3492	68.5331	67.8328	67.5617	61.5307	63.4064	63.4512
		81.7301	83.1296	82.0923	#DIV/0!	#DIV/0!	#DIV/0!	93.8872	93.9068	92.8632	#DIV/0!	#DIV/0!	#DIV/0!
		96.5904	95.2313	94.4908	#DIV/0!	#DIV/0!	#DIV/0!	96.641	95.7257	94.5505	#DIV/0!	#DIV/0!	#DIV/0!
		94.1279	95.1897	93.2963	92.1216	91.7579	92.833	93.2541	94.7747	92.7738	92.5448	92.302	94.281
		66.4127	67.1024	66.1671	70.888	70.637	70.637	93.2196	92.5914	92.715	91.3706	91.5187	91.5187
		88.2616	89.3637	87.7656	87.7033	88.8436	89.991	94.3579	95.448	93.5385	93.8235	96.2198	94.7467
		93.9285	95.3303	92.2988	#DIV/0!	#DIV/0!	#DIV/0!	94.2572	95.0949	92.7235	#DIV/0!	#DIV/0!	#DIV/0!
		93.8891	95.1737	93.5974	#DIV/0!	#DIV/0!	#DIV/0!	94.0031	96.9596	94.1836	#DIV/0!	#DIV/0!	#DIV/0!
		94.9994	95.7145	93.677	#DIV/0!	#DIV/0!	#DIV/0!	94.6894	95.997	93.8789	#DIV/0!	#DIV/0!	#DIV/0!
		95.5503	95.1879	94.2755	#DIV/0!	#DIV/0!	#DIV/0!	95.1932	94.5307	94.1604	#DIV/0!	#DIV/0!	#DIV/0!
