# Supplementary material for: Unstructured regions in IRE1α specify BiP-mediated destabilisation of the luminal domain dimer and repression of the UPR
Source: eLife. 2019 Dec 24;8:e50793. doi: 10.7554/eLife.50793 (PMC6996924; doi:10.7554/eLife.50793)
Supplement: Figure 6—source data 1. [file elife-50793-fig6-data1.xlsx]

## Sheet: Data
Triplicates: 5 uM IRE1 wt, P108A, W125A mut
		wt				mutants
	1	14/12/18				1	17/01/19
	2	01/08/18				2	18/01/2019
	3	01/11/18				3	23/01/2019
									%Hx																														Deuterons
									ex IRE1 wt 30s					ex IRE1 P108A 30s					ex IRE1 W125A 30s					ex IRE1 wt 300s					ex IRE1 P108A 300s					ex IRE1 W125A 300s					ex IRE1 wt 30s					ex IRE1 P108A 30s					ex IRE1 W125A 30s
			#	Peptide Sequence	Peptide	m/z	charge	#H	1	2	3	Average	Error	1	2	3	Average	Error	1	2	3	Average	Error	1	2	3	Average	Error	1	2	3	Average	Error	1	2	3	Average	Error	1	2	3	Average	Error	1	2	3	Average	Error	1
			1	STSTVTLPETLL	1: 1-12	631.345	2	10	0.864834	0.864295	0.864732	0.86462	0.000135182	0.857097	0.863027	0.85372	0.857948	0.00222087	0.83324	0.852831	0.836124	0.840732	0.0049862	0.917138	0.915443	0.916226	0.916269	0.000399789	0.878171	0.889254	0.88224	0.883222	0.00264278	0.861759	0.886282	0.868044	0.872028	0.00600477	8.64834	8.64295	8.64732	8.6462	0.00135182	8.57097	8.63027	8.5372	8.57948	0.0222087	8.3324
			2	FVSTLDGSL	2: 13-21	938.478	1	8	0.137779	0.150919	0.130235	0.139644	0.0049345	0.242538	0.308162	0.319393	0.290031	0.0195687	0.118734	0.202766	0.119898	0.147133	0.0227139	0.273931	0.280115	0.270453	0.274833	0.00230679	0.392683	0.461233	0.473206	0.442374	0.0204817	0.279737	0.36333	0.282272	0.308447	0.0224142	1.10223	1.20735	1.04188	1.11715	0.039476	1.9403	2.46529	2.55514	2.32025	0.156549	0.94987
			3	HAVSKRTGSIKWTL	3: 22-35	396.730	4	13	0.445457	0.450172	0.440901	0.44551	0.00218526	0.487488	0.513124	0.517457	0.506023	0.0076354	0.456584	0.478335	0.458393	0.464438	0.00568979	0.454481	0.456312	0.455125	0.455306	0.000437908	0.518822	0.559802	0.569511	0.549378	0.0126825	0.470418	0.515857	0.47096	0.485745	0.0122939	5.79094	5.85223	5.73171	5.79163	0.0284083	6.33735	6.67061	6.72694	6.5783	0.0992602	5.9356
			4	QVPTHVEE	4: 42-49	469.731	2	6	0.012016	0.926	0.917372	0.618463	0.247589	0.870641	0.897092	0.885508	0.884414	0.00625061	0.886575	0.886207	0.906792	0.893192	0.00555317	0.0122594	0.934255	0.909433	0.618649	0.247627	0.869902	0.903262	0.89755	0.890238	0.00841062	0.880122	0.898449	0.906155	0.894909	0.00630385	0.0720962	5.556	5.50423	3.71078	1.48554	5.22385	5.38255	5.31305	5.30648	0.0375036	5.31945
			5	LPDPNDGSL	5: 53-61	927.435	1	6	0.0952821	0.0982465	0.0947211	0.0960832	0.000892996	0.322248	0.427405	0.450885	0.400179	0.032293	0.137053	0.250156	0.13867	0.175293	0.030565	0.197342	0.196126	0.19996	0.197809	0.000923509	0.657108	0.678288	0.66895	0.668116	0.00500375	0.26859	0.354286	0.265698	0.296191	0.0237269	0.571692	0.589479	0.568327	0.576499	0.00535798	1.93349	2.56443	2.70531	2.40108	0.193758	0.822317
			6	YTLGSKNNEGLTKLPFTIPEL	6: 62-82	779.087	3	19	0.483084	0.493886	0.486174	0.487715	0.00262243	0.63138	0.693007	0.707381	0.677256	0.0190327	0.516939	0.590336	0.523704	0.54366	0.019122	0.570357	0.579735	0.569358	0.57315	0.00269863	0.859747	0.869541	0.868296	0.865861	0.00251327	0.624945	0.686884	0.63253	0.64812	0.0159261	9.1786	9.38383	9.2373	9.26658	0.0498262	11.9962	13.1671	13.4402	12.8679	0.361622	9.82184
			7	LTKLPFTIPEL	7: 72-82	636.380	2	8	0.147296	0.148314	0.150073	0.148561	0.000662233	0.394598	0.50612	0.53009	0.476936	0.0340857	0.217682	0.364872	0.215916	0.266157	0.0403026	0.231655	0.240405	0.241326	0.237795	0.00251615	0.785483	0.8116	0.809873	0.802319	0.00688523	0.366958	0.489367	0.362176	0.406167	0.0339849	1.17837	1.18651	1.20058	1.18849	0.00529786	3.15679	4.04896	4.24072	3.81549	0.272686	1.74146
			8	VQASPSRSSDGIL	8: 83-95	1316.68	1	11	0.43254	0.445178	0.431395	0.436371	0.00360564	0.844468	0.844011	0.839199	0.842559	0.00137598	0.678552	0.684684	0.675405	0.679547	0.0022245	0.671161	0.674753	0.676502	0.674139	0.00128351	0.894958	0.907757	0.900669	0.901128	0.00302251	0.835925	0.842503	0.854423	0.844284	0.00442013	4.75794	4.89696	4.74535	4.80008	0.0396621	9.28915	9.28412	9.23119	9.26815	0.0151358	7.46407
			9	YMGKKQDIW	9: 96-104	390.199	3	8	0.0852524	0.0870887	0.0812473	0.0845295	0.00140809	0.471669	0.492827	0.499572	0.488023	0.00686303	0.365651	0.41928	0.355325	0.380085	0.0161852	0.276389	0.285428	0.290079	0.283965	0.00328156	0.703841	0.706086	0.702512	0.704146	0.000851605	0.566605	0.58369	0.545797	0.565364	0.00894572	0.682019	0.696709	0.649979	0.676236	0.0112647	3.77335	3.94262	3.99658	3.90418	0.0549042	2.92521
			10	YVIDLL	10: 105-110	735.424	1	5	0.0542887	0.0631446	0.0634168	0.0602834	0.00244816	0.0944225	0.114593	0.120335	0.109783	0.00641545	0.129929	0.158155	0.108368	0.132151	0.0117701	0.318265	0.336497	0.346804	0.333855	0.00681238	0.406953	0.43784	0.43167	0.425488	0.00770526	0.440602	0.478045	0.435748	0.451465	0.0109114	0.271444	0.315723	0.317084	0.301417	0.0122408	0.472112	0.572966	0.601674	0.548917	0.0320772	0.649644
			11	LTGEKQQTLSSA	11: 110-121	631.832	2	11	0.776526	0.785433	0.778204	0.780054	0.00223108	0.772679	0.808372	0.812832	0.797961	0.010375	0.789616	0.801074	0.795837	0.795509	0.00270415	0.937476	0.943084	0.929904	0.936821	0.00311824	0.897141	0.916086	0.91509	0.909439	0.00502627	0.923952	0.925589	0.925891	0.925144	0.000491842	8.54179	8.63976	8.56024	8.5806	0.0245418	8.49946	8.89209	8.94116	8.77757	0.114125	8.68577
			13	ADSLSPSTSLL	13: 123-133	1090.56	1	9	0.798036	0.799046	0.794864	0.797315	0.00102866	0.784355	0.795222	0.774694	0.784757	0.00484141	0.76334	0.791857	0.804061	0.786419	0.00985128	0.808161	0.812005	0.806419	0.808862	0.00134747	0.843893	0.856869	0.84239	0.847717	0.00375285	0.838024	0.836811	0.842272	0.839036	0.00135172	7.18232	7.19141	7.15378	7.17584	0.00925797	7.05919	7.157	6.97224	7.06281	0.0435727	6.87006
			14	LYLGRTEYTITM	14: 133-144	730.874	2	11	0.01113	0.0106081	0.0122173	0.0113185	0.00038701	0.014832	0.0198599	0.0211625	0.0186182	0.00157588	0.0473873	0.0428441	0.045659	0.0452968	0.001081	0.0269339	0.0278311	0.0293992	0.0280547	0.000588208	0.0562966	0.0566615	0.0565182	0.0564921	8.66801e-05	0.0812164	0.0745464	0.0786564	0.0781397	0.00158622	0.12243	0.116689	0.13439	0.124503	0.00425711	0.163152	0.218459	0.232788	0.2048	0.0173347	0.52126
			15	MYDTKTRE	15: 144-151	522.242	2	7	0.542662	0.570995	0.543684	0.552447	0.00757613	0.77812	0.818144	0.789743	0.795336	0.00970609	0.695077	0.6928	0.690501	0.692793	0.0010786	0.849278	0.836156	0.815489	0.833641	0.00803009	0.859171	0.885043	0.869485	0.871233	0.0061397	0.854013	0.863716	0.855852	0.85786	0.00242963	3.79863	3.99697	3.80579	3.86713	0.0530329	5.44684	5.72701	5.5282	5.56735	0.0679426	4.86554
			16	LRWNATYF	16: 152-159	535.772	2	7	0.197583	0.206664	0.203856	0.202701	0.00219191	0.260779	0.300764	0.30331	0.288285	0.0112451	0.161871	0.182781	0.162427	0.169027	0.00561676	0.332025	0.333165	0.332371	0.33252	0.000275384	0.427399	0.458541	0.452684	0.446208	0.00780187	0.341589	0.351975	0.342246	0.34527	0.00274174	1.38308	1.44665	1.42699	1.41891	0.0153434	1.82545	2.10535	2.12317	2.01799	0.0787156	1.1331
			17	AASLPEDDVD	17: 162-171	1031.447	1	8	0.94038	0.93481	0.935891	0.937027	0.00139242	0.920586	0.92409	0.907782	0.917486	0.00404679	0.942829	0.900465	0.925086	0.922793	0.0100291	0.934627	0.911927	0.944109	0.930221	0.00779586	0.925615	0.933583	0.923201	0.927467	0.00256115	0.946417	0.906677	0.935381	0.929492	0.00967045	7.52304	7.47848	7.48713	7.49622	0.0111394	7.36469	7.39272	7.26225	7.33989	0.0323743	7.54263
			18	YKMSHFVSNGDGL	18: 172-184	727.837	2	12	0.404407	0.409996	0.407055	0.407153	0.00131788	0.422543	0.433489	0.431776	0.429269	0.0027756	0.408972	0.407526	0.415148	0.410549	0.00190818	0.478299	0.477429	0.479254	0.478327	0.000430299	0.483896	0.498002	0.499095	0.493664	0.00399616	0.467069	0.472318	0.469585	0.469658	0.00123749	4.85289	4.91995	4.88466	4.88583	0.0158145	5.07051	5.20187	5.18131	5.15123	0.0333072	4.90767
			19	VVTVDSESGDVLW	19: 185-197	703.343	2	12	0.370346	0.37725	0.380537	0.376044	0.00245197	0.388924	0.399133	0.39989	0.395982	0.00288711	0.394791	0.395289	0.400086	0.396722	0.00137851	0.440048	0.433088	0.433605	0.43558	0.00182794	0.435532	0.456864	0.459336	0.450578	0.00616981	0.42798	0.441584	0.435667	0.435077	0.00321548	4.44415	4.527	4.56644	4.51253	0.0294237	4.66708	4.7896	4.79867	4.75178	0.0346454	4.73749
			20	WIQNYASPVVAF	20: 197-208	697.856	2	10	0.204368	0.202192	0.202894	0.203151	0.000523446	0.214247	0.222529	0.224699	0.220492	0.00260021	0.208078	0.215017	0.209006	0.210701	0.0017759	0.251052	0.250082	0.252444	0.251193	0.000559615	0.277031	0.291368	0.288427	0.285608	0.00356971	0.267821	0.281132	0.270605	0.273186	0.00330981	2.04368	2.02192	2.02894	2.03151	0.00523446	2.14247	2.22529	2.24699	2.20492	0.0260021	2.08078
			21	YVWQREGL	21: 209-216	1050.54	1	7	0.607033	0.61945	0.621823	0.616102	0.00374451	0.611198	0.588346	0.593866	0.597804	0.005621	0.633687	0.629165	0.652235	0.638362	0.00576287	0.777995	0.764437	0.775747	0.772727	0.0034254	0.778501	0.804088	0.782745	0.788445	0.00646411	0.789983	0.785321	0.793362	0.789555	0.00190343	4.24923	4.33615	4.35276	4.31271	0.0262116	4.27839	4.11842	4.15706	4.18462	0.039347	4.43581
			22	RKVMHINV	22: 217-224	332.864	3	7	0.273467	0.281788	0.278566	0.27794	0.00197786	0.31725	0.327652	0.337779	0.327561	0.00483897	0.293137	0.296699	0.297421	0.295753	0.00108132	0.375273	0.375134	0.379422	0.37661	0.00114867	0.411969	0.442368	0.44776	0.434032	0.00909646	0.381562	0.397154	0.380405	0.386374	0.00440954	1.91427	1.97251	1.94996	1.94558	0.013845	2.22075	2.29357	2.36446	2.29292	0.0338728	2.05196
			24	LRYLTF	24: 229-234	406.735	2	5	0.743402	0.733068	0.733565	0.736678	0.00274732	0.722273	0.697863	0.676953	0.69903	0.0106925	0.746408	0.695478	0.749296	0.730394	0.0142706	0.923736	0.917951	0.92159	0.921092	0.00137862	0.882113	0.895845	0.833247	0.870402	0.0155099	0.917659	0.871578	0.923655	0.904298	0.0134321	3.71701	3.66534	3.66783	3.68339	0.0137366	3.61136	3.48932	3.38477	3.49515	0.0534627	3.73204
			25	MSGEVGRITKWKYPFPKETEA	25: 235-255	491.656	5	18	0.959599	0.950827	0.943916	0.951447	0.00370526	0.929815	0.918825	0.914365	0.921002	0.0037485	0.935019	0.924768	0.940431	0.933406	0.00375003	0.97148	0.942373	0.942149	0.952	0.00795249	0.929015	0.922246	0.925201	0.925488	0.00159973	0.928314	0.924491	0.94579	0.932865	0.00535298	17.2728	17.1149	16.9905	17.126	0.0666946	16.7367	16.5389	16.4586	16.578	0.067473	16.8303
			26	KSKLTPTL	26: 256-263	444.28	2	6	0.396076	0.398665	0.395024	0.396589	0.000883221	0.566926	0.620727	0.631908	0.60652	0.0163779	0.424179	0.490749	0.426241	0.447057	0.0178442	0.778603	0.78631	0.782322	0.782412	0.00181698	0.899813	0.894287	0.881112	0.891737	0.00452912	0.820245	0.827603	0.817613	0.82182	0.00244102	2.37646	2.39199	2.37015	2.37953	0.00529933	3.40155	3.72436	3.79145	3.63912	0.0982675	2.54507
			27	YVGKYSTSL	27: 264-272	1017.53	1	8	0.644782	0.650112	0.64574	0.646878	0.00133943	0.730102	0.731703	0.736824	0.732876	0.00165525	0.671419	0.665166	0.674509	0.670365	0.00224392	0.892763	0.884652	0.888291	0.888569	0.00191533	0.900739	0.885418	0.87125	0.885802	0.00695242	0.881413	0.867414	0.886273	0.878367	0.0046157	5.15826	5.2009	5.16592	5.17502	0.0107155	5.84082	5.85362	5.89459	5.86301	0.013242	5.37136
			28	YASPSM	28: 273-278	655.273	1	4	0.133838	0.131689	0.124735	0.130087	0.00224284	0.393569	0.492681	0.525624	0.470625	0.0324019	0.155264	0.273264	0.153096	0.193875	0.0324145	0.685331	0.678328	0.675617	0.679759	0.00236294	0.921932	0.931041	0.927115	0.926696	0.00215389	0.705477	0.736488	0.690812	0.710925	0.0109933	0.53535	0.526755	0.498941	0.520349	0.00897137	1.57428	1.97072	2.1025	1.8825	0.129608	0.621058
			29	VHEGVAVVPRGSTL	29: 279-292	474.268	3	12	0.817301	0.831296	0.820923	0.823173	0.00342426	0.857569	0.864363	0.870796	0.864243	0.00311801	0.839725	0.83966	0.842739	0.840708	0.000829371	0.938872	0.939068	0.928632	0.935524	0.00281414	0.908308	0.916334	0.915201	0.913281	0.00204769	0.922657	0.911873	0.92118	0.91857	0.00275616	9.80761	9.97555	9.85108	9.87808	0.0410911	10.2908	10.3724	10.4496	10.3709	0.0374161	10.0767
			30	PLLEGPQTDGVTIGDKGES	30: 293-311	956.978	2	16	0.965904	0.952313	0.944908	0.954375	0.00501979	0.929664	0.939754	0.944818	0.938079	0.00363685	0.933821	0.929084	0.944896	0.935934	0.00382551	0.96641	0.957257	0.945505	0.956391	0.00494005	0.93352	0.947844	0.949998	0.943787	0.00422208	0.93676	0.934889	0.95035	0.940666	0.00397784	15.4545	15.237	15.1185	15.27	0.0803167	14.8746	15.0361	15.1171	15.0093	0.0581897	14.9411
			31	VKFDPGLKSKNKLNYLRN	31: 319-336	534.307	4	16	0.941279	0.951897	0.932963	0.942047	0.00447364	0.920904	0.91463	0.905349	0.913628	0.00368902	0.93751	0.913017	0.920728	0.923752	0.00590346	0.932541	0.947747	0.927738	0.936009	0.0049242	0.922585	0.92175	0.917621	0.920652	0.00125291	0.945917	0.922219	0.928364	0.932167	0.00579756	15.0605	15.2304	14.9274	15.0727	0.0715782	14.7345	14.6341	14.4856	14.618	0.0590244	15.0002
			32	LLIGHHETPLSA	32: 339-350	644.354	2	10	0.664127	0.671024	0.661671	0.665607	0.00228585	0.747482	0.744593	0.750672	0.747582	0.00143342	0.646771	0.687286	0.663829	0.665962	0.00958904	0.932196	0.925914	0.92715	0.92842	0.00156896	0.885325	0.891259	0.852925	0.876503	0.00972677	0.866573	0.862321	0.880542	0.869812	0.00449371	6.64127	6.71024	6.61671	6.65607	0.0228585	7.47482	7.44593	7.50672	7.47582	0.0143342	6.46771
			33	IGHHETPLSASTKM	33: 341-354	503.588	3	12	0.882616	0.893637	0.877656	0.884636	0.0038559	0.888379	0.893055	0.888049	0.889828	0.00131971	0.867269	0.860059	0.866318	0.864549	0.00184643	0.943579	0.95448	0.935385	0.944481	0.00451562	0.901278	0.915294	0.912925	0.909832	0.00353673	0.904689	0.902732	0.90717	0.904863	0.00104849	10.5914	10.7236	10.5319	10.6156	0.0462708	10.6605	10.7167	10.6566	10.6779	0.0158365	10.4072
			34	LERFPNNLPKHRENVIPADSEKKSFE	34: 355-380	516.606	6	23	0.939285	0.953303	0.922988	0.938525	0.00715211	0.916563	0.9241	0.91157	0.917411	0.00297356	0.902364	0.894148	0.918077	0.904863	0.00573155	0.942572	0.950949	0.927235	0.940252	0.00566918	0.920417	0.927018	0.919128	0.922188	0.0019954	0.929606	0.917667	0.919053	0.922109	0.00307827	21.6036	21.926	21.2287	21.5861	0.164499	21.081	21.2543	20.9661	21.1004	0.0683918	20.7544
			35	VDQTSENAPTTVSRD	35: 386-400	810.376	2	13	0.938891	0.951737	0.935974	0.942201	0.00395346	0.936092	0.952404	0.943697	0.944064	0.00384752	0.940321	0.93202	0.940834	0.937725	0.00233208	0.940031	0.969596	0.941836	0.950488	0.00781262	0.9417	0.957385	0.945342	0.948142	0.00386984	0.943683	0.942303	0.944714	0.943567	0.000570373	12.2056	12.3726	12.1677	12.2486	0.051395	12.1692	12.3812	12.2681	12.2728	0.0500177	12.2242
			36	VDQTSENAPTTVSRDVEEKPAHAPARPEAPVDSM	36: 386-419	727.149	5	32	0.949994	0.957145	0.93677	0.947969	0.00487302	0.913315	0.940175	0.93557	0.929687	0.00677111	0.934963	0.923723	0.936682	0.931789	0.00331784	0.946894	0.95997	0.938789	0.948551	0.00503818	0.92581	0.942058	0.940658	0.936175	0.00424434	0.934473	0.93126	0.9409	0.935544	0.00231378	30.3998	30.6286	29.9766	30.335	0.155937	29.2261	30.0856	29.9382	29.75	0.216676	29.9188
			37	VEEKPAHAPARPEAPVDSML	37: 401-420	536.774	4	15	0.955503	0.951879	0.942755	0.950046	0.00309647	0.914677	0.933617	0.938077	0.92879	0.00585685	0.920952	0.914668	0.923383	0.919668	0.00211998	0.951932	0.945307	0.941604	0.946281	0.00246645	0.91996	0.936669	0.935669	0.930766	0.0044179	0.925674	0.919211	0.927988	0.924291	0.00214456	14.3325	14.2782	14.1413	14.2507	0.0464471	13.7202	14.0043	14.0712	13.9319	0.0878527	13.8143
[truncated: 27 more columns]
