# Supplementary material for: Unstructured regions in IRE1α specify BiP-mediated destabilisation of the luminal domain dimer and repression of the UPR
Source: eLife. 2019 Dec 24;8:e50793. doi: 10.7554/eLife.50793 (PMC6996924; doi:10.7554/eLife.50793)
Supplement: Figure 6—source data 2. [file elife-50793-fig6-data2.xlsx]

## Sheet: IRE1 wt
IRE1 wt (UK2042)
	1	14/12/18	and 24/01/19 for -ATP			for IRE1 + ERdj4 only		31/01/19
	2	2019-08-01						01/02/19
	3	2019-11-01						27/02/19
								%Hx																																								Deuterons
								ex IRE1 only 30s					ex IRE1+BiP+ERdj4+ATP 30s					ex IRE1+BiP+ERdj4-ATP 30s					ex IRE1+ERdj4 30s					ex IRE1 only 300s					ex IRE1+BiP+ERdj4+ATP 300s					ex IRE1+BiP+ERdj4-ATP 300s					ex IRE1+ERdj4 300s					ex IRE1 only 30s
	Comment	#	Peptide Sequence	Peptide	m/z	charge	#H	1	2	3	Average	Error	1	2	3	Average	Error	1	2	3	Average	Error	1	2	3	Average	Error	1	2	3	Average	Error	1	2	3	Average	Error	1	2	3	Average	Error	1	2	3	Average	Error	1	2
		1	STSTVTLPETLL	1: 1-12	631.345	2	10	0.864834	0.864295	0.864732	0.86462	0.000135182	0.864463	0.865382	0.870463	0.866769	0.00152339	0.839755	0.871135	0.870618	0.860503	0.00847119	0.835135	0.852103	0.878811	0.85535	0.0103797	0.917138	0.915443	0.916226	0.916269	0.000399789	0.898386	0.905638	0.905	0.903008	0.00189292	0.876289	0.905818	0.905973	0.896027	0.00805814	0.883498	0.888064	0.906616	0.892726	0.00577188	8.64834	8.64295
		2	FVSTLDGSL	2: 13-21	938.478	1	8	0.137779	0.150919	0.130235	0.139644	0.0049345	0.147352	0.154215	0.147375	0.149648	0.00186475	0.135252	0.151887	0.14072	0.14262	0.00399692	0.127638	0.1749	0.132137	0.144892	0.0122967	0.273931	0.280115	0.270453	0.274833	0.00230679	0.277463	0.294749	0.283168	0.285127	0.00415201	0.272487	0.275693	0.278962	0.275714	0.00152607	0.259583	0.30332	0.271819	0.278241	0.0106371	1.10223	1.20735
		3	HAVSKRTGSIKWTL	3: 22-35	396.730	4	13	0.445457	0.450172	0.440901	0.44551	0.00218526	0.438409	0.434779	0.439463	0.43755	0.00115846	0.424738	0.449294	0.437087	0.43704	0.00578791	0.437051	0.439597	0.440785	0.439144	0.000899128	0.454481	0.456312	0.455125	0.455306	0.000437908	0.463607	0.452913	0.457776	0.458099	0.00252418	0.438773	0.452424	0.452651	0.44795	0.0037467	0.452697	0.448792	0.450805	0.450765	0.000920469	5.79094	5.85223
		4	QVPTHVEE	4: 42-49	469.731	2	6	0.012016	0.926	0.917372	0.618463	0.247589	0.0118259	0.847029	0.846158	0.568338	0.227195	0.812549	0.861664	0.86141	0.845207	0.013333	#DIV/0!	#DIV/0!	#DIV/0!	#DIV/0!	#DIV/0!	0.0122594	0.934255	0.909433	0.618649	0.247627	0.0125056	0.838383	0.834074	0.561654	0.224191	0.814766	0.855835	0.845586	0.838729	0.0100767	#DIV/0!	#DIV/0!	#DIV/0!	#DIV/0!	#DIV/0!	0.0720962	5.556
		5	LPDPNDGSL	5: 53-61	927.435	1	6	0.0952821	0.0982465	0.0947211	0.0960832	0.000892996	0.137662	0.159579	0.142788	0.146676	0.00540434	0.0837451	0.0924217	0.0859214	0.0873627	0.00212808	0.103376	0.0994906	0.107699	0.103522	0.00193555	0.197342	0.196126	0.19996	0.197809	0.000923509	0.287992	0.326013	0.304277	0.306094	0.00899236	0.179438	0.186981	0.1824	0.18294	0.00179142	0.204073	0.214264	0.202594	0.206977	0.00299537	0.571692	0.589479
		6	YTLGSKNNEGLTKLPFTIPEL	6: 62-82	779.087	3	19	0.483084	0.493886	0.486174	0.487715	0.00262243	0.505508	0.513981	0.510014	0.509834	0.00199858	0.468375	0.485985	0.480389	0.478249	0.00424175	0.47239	0.485939	0.465117	0.474482	0.00498137	0.570357	0.579735	0.569358	0.57315	0.00269863	0.625417	0.65626	0.638351	0.640009	0.00730108	0.554706	0.572063	0.569867	0.565545	0.00445519	0.551954	0.57379	0.546555	0.557433	0.00679796	9.1786	9.38383
		7	LTKLPFTIPEL	7: 72-82	636.380	2	8	0.147296	0.148314	0.150073	0.148561	0.000662233	0.188863	0.192134	0.188124	0.189707	0.00100607	0.149133	0.150339	0.150877	0.150116	0.00042094	0.15161	0.147971	0.15181	0.150464	0.0010188	0.231655	0.240405	0.241326	0.237795	0.00251615	0.34774	0.393365	0.365612	0.368906	0.0108377	0.245271	0.243368	0.248446	0.245695	0.0012094	0.241449	0.239921	0.242341	0.241237	0.000577082	1.17837	1.18651
		8	VQASPSRSSDGIL	8: 83-95	1316.68	1	11	0.43254	0.445178	0.431395	0.436371	0.00360564	0.424518	0.435984	0.425297	0.4286	0.0030204	0.429133	0.426444	0.414195	0.423257	0.00375369	0.417645	0.435691	0.431135	0.428157	0.00442378	0.671161	0.674753	0.676502	0.674139	0.00128351	0.672093	0.659553	0.658874	0.663507	0.00350893	0.632572	0.631254	0.630862	0.631563	0.000422097	0.640075	0.667381	0.673815	0.660423	0.00844462	4.75794	4.89696
		9	YMGKKQDIW	9: 96-104	390.199	3	8	0.0852524	0.0870887	0.0812473	0.0845295	0.00140809	0.150677	0.141188	0.135495	0.142454	0.00361554	0.0808674	0.109704	0.103452	0.0980078	0.00715108	0.0872243	0.0822554	0.0952336	0.0882378	0.00308686	0.276389	0.285428	0.290079	0.283965	0.00328156	0.343765	0.385352	0.367529	0.365548	0.00983543	0.285683	0.298395	0.289691	0.291257	0.00306359	0.283708	0.2812	0.281358	0.282089	0.000662158	0.682019	0.696709
		10	YVIDLL	10: 105-110	735.424	1	5	0.0542887	0.0631446	0.0634168	0.0602834	0.00244816	0.111441	0.100015	0.117506	0.109654	0.00418664	0.0913605	0.0855435	0.0947052	0.0905364	0.00218549	0.0579425	0.0637848	0.0847144	0.0688139	0.00663582	0.318265	0.336497	0.346804	0.333855	0.00681238	0.333483	0.333079	0.339	0.335187	0.00155945	0.304688	0.320991	0.325116	0.316932	0.00509208	0.332798	0.333687	0.321982	0.329489	0.00307187	0.271444	0.315723
		11	LTGEKQQTLSSA	11: 110-121	631.832	2	11	0.776526	0.785433	0.778204	0.780054	0.00223108	0.816079	0.822414	0.82152	0.820004	0.00161633	0.778398	0.796015	0.797834	0.790749	0.00506044	0.761992	0.777153	0.785787	0.774977	0.00567829	0.937476	0.943084	0.929904	0.936821	0.00311824	0.942156	0.938835	0.932393	0.937795	0.00234004	0.923573	0.940062	0.930655	0.93143	0.00389943	0.910616	0.928778	0.930361	0.923252	0.0051718	8.54179	8.63976
		13	ADSLSPSTSLL	13: 123-133	1090.56	1	9	0.798036	0.799046	0.794864	0.797315	0.00102866	0.771737	0.770402	0.774898	0.772345	0.0010884	0.741171	0.785735	0.772209	0.766372	0.0107707	0.774389	0.768464	0.771986	0.771613	0.00140478	0.808161	0.812005	0.806419	0.808862	0.00134747	0.77684	0.778049	0.788085	0.780991	0.00291009	0.754041	0.78421	0.779409	0.772553	0.00764201	0.785151	0.782914	0.776928	0.781665	0.00200417	7.18232	7.19141
		14	LYLGRTEYTITM	14: 133-144	730.874	2	11	0.01113	0.0106081	0.0122173	0.0113185	0.00038701	0.0163788	0.0163254	0.0126037	0.0151026	0.00102025	0.0125412	0.0132065	0.00942489	0.0117242	0.000951695	0.0138899	0.0134317	0.014945	0.0140889	0.000365814	0.0269339	0.0278311	0.0293992	0.0280547	0.000588208	0.0326077	0.0338342	0.0306521	0.0323647	0.000756579	0.0351389	0.0273782	0.0312429	0.0312533	0.00182923	0.0319616	0.0311043	0.0253358	0.0294672	0.0016987	0.12243	0.116689
		15	MYDTKTRE	15: 144-151	522.242	2	7	0.542662	0.570995	0.543684	0.552447	0.00757613	0.550256	0.556244	0.547848	0.551449	0.00203806	0.544558	0.564107	0.549629	0.552765	0.00478225	0.533766	0.553889	0.574463	0.554039	0.00959263	0.849278	0.836156	0.815489	0.833641	0.00803009	0.846729	0.83324	0.805892	0.82862	0.00980849	0.816405	0.832958	0.807452	0.818938	0.00610023	0.810147	0.803794	0.831605	0.815182	0.00686985	3.79863	3.99697
		16	LRWNATYF	16: 152-159	535.772	2	7	0.197583	0.206664	0.203856	0.202701	0.00219191	0.205346	0.214326	0.216066	0.211913	0.002712	0.200198	0.205114	0.207817	0.204376	0.00182091	0.203959	0.206004	0.207408	0.20579	0.000817617	0.332025	0.333165	0.332371	0.33252	0.000275384	0.361341	0.376476	0.368718	0.368845	0.0035679	0.320122	0.325937	0.324294	0.323451	0.00141309	0.325565	0.329799	0.325632	0.326999	0.00114336	1.38308	1.44665
		17	AASLPEDDVD	17: 162-171	1031.447	1	8	0.94038	0.93481	0.935891	0.937027	0.00139242	0.974683	0.943068	0.957539	0.95843	0.00746055	0.934678	0.933774	0.922701	0.930384	0.00314402	0.944583	0.937194	0.950791	0.944189	0.00320894	0.934627	0.911927	0.944109	0.930221	0.00779586	0.963761	0.936342	0.96175	0.953951	0.00720444	0.935457	0.93855	0.955245	0.943084	0.00501796	0.959018	0.940644	0.955323	0.951662	0.00458153	7.52304	7.47848
		18	YKMSHFVSNGDGL	18: 172-184	727.837	2	12	0.404407	0.409996	0.407055	0.407153	0.00131788	0.386206	0.386088	0.396547	0.389614	0.00283067	0.369933	0.387316	0.391386	0.382879	0.00537126	0.378805	0.387261	0.388056	0.384708	0.00241684	0.478299	0.477429	0.479254	0.478327	0.000430299	0.472152	0.469698	0.471846	0.471232	0.000630497	0.427675	0.453027	0.458554	0.446419	0.00776229	0.458555	0.449457	0.457141	0.455051	0.00230796	4.85289	4.91995
		19	VVTVDSESGDVLW	19: 185-197	703.343	2	12	0.370346	0.37725	0.380537	0.376044	0.00245197	0.287727	0.289358	0.302744	0.293276	0.00388418	0.296198	0.315292	0.315434	0.308974	0.00521611	0.357246	0.378236	0.344848	0.36011	0.00795589	0.440048	0.433088	0.433605	0.43558	0.00182794	0.402631	0.406938	0.406215	0.405262	0.00108733	0.387474	0.406589	0.410608	0.401557	0.0058269	0.414609	0.414328	0.402207	0.410381	0.00333774	4.44415	4.527
		20	WIQNYASPVVAF	20: 197-208	697.856	2	10	0.204368	0.202192	0.202894	0.203151	0.000523446	0.19543	0.198799	0.202638	0.198956	0.00170015	0.197783	0.196949	0.1972	0.197311	0.000201733	0.203964	0.20461	0.210468	0.206347	0.00168921	0.251052	0.250082	0.252444	0.251193	0.000559615	0.249934	0.257319	0.254081	0.253778	0.00174522	0.249489	0.24915	0.24771	0.248783	0.000445388	0.255316	0.252622	0.236564	0.248168	0.00477947	2.04368	2.02192
		21	YVWQREGL	21: 209-216	1050.54	1	7	0.607033	0.61945	0.621823	0.616102	0.00374451	0.61499	0.618619	0.629836	0.621148	0.00364861	0.609204	0.616911	0.627518	0.617878	0.00433451	0.592032	0.600622	0.597486	0.596713	0.00204903	0.777995	0.764437	0.775747	0.772727	0.0034254	0.79018	0.795618	0.804362	0.79672	0.00337286	0.767056	0.779799	0.780734	0.775863	0.00360208	0.745264	0.761704	0.763189	0.756719	0.00468953	4.24923	4.33615
		22	RKVMHINV	22: 217-224	332.864	3	7	0.273467	0.281788	0.278566	0.27794	0.00197786	0.33743	0.342721	0.338719	0.339623	0.00130063	0.303925	0.307657	0.308435	0.306672	0.00113662	0.293694	0.294984	0.278617	0.289098	0.00428971	0.375273	0.375134	0.379422	0.37661	0.00114867	0.443171	0.471157	0.453084	0.455804	0.0066891	0.387536	0.400207	0.397627	0.395123	0.00315665	0.388478	0.384214	0.371686	0.381459	0.00411456	1.91427	1.97251
		24	LRYLTF	24: 229-234	406.735	2	5	0.743402	0.733068	0.733565	0.736678	0.00274732	0.740425	0.747222	0.761994	0.74988	0.00519842	0.726116	0.733357	0.741608	0.733694	0.00365413	0.714606	0.730355	0.722017	0.722326	0.00371442	0.923736	0.917951	0.92159	0.921092	0.00137862	0.910944	0.904365	0.916453	0.910587	0.00285287	0.905073	0.910924	0.915853	0.910617	0.00254401	0.899915	0.912577	0.907855	0.906782	0.00301662	3.71701	3.66534
		26	KSKLTPTL	26: 256-263	444.28	2	6	0.396076	0.398665	0.395024	0.396589	0.000883221	0.496388	0.521386	0.501596	0.506457	0.00621719	0.398099	0.406081	0.408335	0.404172	0.00253561	0.400793	0.406896	0.385766	0.397818	0.00512646	0.778603	0.78631	0.782322	0.782412	0.00181698	0.799938	0.806812	0.801727	0.802825	0.00168121	0.776773	0.784939	0.78897	0.783561	0.00292944	0.781562	0.773869	0.776447	0.777293	0.00184586	2.37646	2.39199
		27	YVGKYSTSL	27: 264-272	1017.53	1	8	0.644782	0.650112	0.64574	0.646878	0.00133943	0.698916	0.714161	0.706307	0.706461	0.00359383	0.648019	0.657043	0.657193	0.654085	0.0024767	0.64579	0.65938	0.660064	0.655078	0.00379513	0.892763	0.884652	0.888291	0.888569	0.00191533	0.901922	0.892976	0.897957	0.897618	0.00211329	0.879421	0.880097	0.882949	0.880822	0.00088276	0.884912	0.887614	0.889415	0.887314	0.00106852	5.15826	5.2009
		28	YASPSM	28: 273-278	655.273	1	4	0.133838	0.131689	0.124735	0.130087	0.00224284	0.325598	0.363206	0.311717	0.333507	0.0125582	0.120689	0.12993	0.119329	0.123316	0.00271903	0.125661	0.123166	0.146814	0.13188	0.0061249	0.685331	0.678328	0.675617	0.679759	0.00236294	0.798525	0.816545	0.806585	0.807218	0.00425515	0.683502	0.694956	0.690586	0.689682	0.00272485	0.656355	0.661189	0.687118	0.668221	0.00779858	0.53535	0.526755
		29	VHEGVAVVPRGSTL	29: 279-292	474.268	3	12	0.817301	0.831296	0.820923	0.823173	0.00342426	0.832065	0.840729	0.831798	0.834864	0.0023951	0.803628	0.830288	0.824221	0.819379	0.00658744	0.801822	0.823954	0.810016	0.811931	0.005275	0.938872	0.939068	0.928632	0.935524	0.00281414	0.941868	0.945626	0.921025	0.936173	0.00624717	0.912022	0.938531	0.926413	0.925655	0.00625589	0.908668	0.926912	0.920335	0.918638	0.00435557	9.80761	9.97555
		30	PLLEGPQTDGVTIGDKGES	30: 293-311	956.978	2	16	0.965904	0.952313	0.944908	0.954375	0.00501979	0.925605	0.928327	0.916618	0.923516	0.00288856	0.92061	0.941445	0.926958	0.929671	0.00503413	0.927149	0.929998	0.939031	0.932059	0.0029243	0.96641	0.957257	0.945505	0.956391	0.00494005	0.935264	0.909858	0.917136	0.920753	0.00616762	0.925417	0.927693	0.922112	0.925074	0.00132294	0.929803	0.936776	0.94764	0.938073	0.00423741	15.4545	15.237
		31	VKFDPGLKSKNKLNYLRN	31: 319-336	534.307	4	16	0.941279	0.951897	0.932963	0.942047	0.00447364	0.938939	0.947913	0.92346	0.936771	0.00583127	0.905721	0.938288	0.932719	0.925576	0.00821126	0.898299	0.920479	0.905649	0.908142	0.00532617	0.932541	0.947747	0.927738	0.936009	0.0049242	0.93938	0.938161	0.933489	0.93701	0.00146589	0.908427	0.946771	0.926518	0.927239	0.00904267	0.91824	0.923087	0.923838	0.921722	0.00143238	15.0605	15.2304
		32	IGHHETPLSASTKM	32: 341-354	503.588	3	12	0.882616	0.893637	0.877656	0.884636	0.0038559	0.892127	0.904516	0.901323	0.899322	0.00303217	0.866661	0.903221	0.886412	0.885431	0.00862662	0.866987	0.863143	0.887847	0.872659	0.00626648	0.943579	0.95448	0.935385	0.944481	0.00451562	0.941532	0.944989	0.93231	0.93961	0.00308954	0.893576	0.953504	0.927689	0.924923	0.0141703	0.923184	0.914914	0.941771	0.926623	0.00648422	10.5914	10.7236
		33	LERFPNNLPKHRENVIPADSEKKSFE	33: 355-380	516.606	6	23	0.939285	0.953303	0.922988	0.938525	0.00715211	0.921776	0.930578	0.918281	0.923545	0.00298702	0.915519	0.927964	0.921306	0.921596	0.00293572	0.895448	0.908296	0.887071	0.896938	0.00503972	0.942572	0.950949	0.927235	0.940252	0.00566918	0.924122	0.936745	0.936917	0.932595	0.00345922	0.921837	0.93514	0.933416	0.930131	0.00341021	0.901285	0.917808	0.905563	0.908219	0.00404242	21.6036	21.926
		34	VDQTSENAPTTVSRD	34: 386-400	810.376	2	13	0.938891	0.951737	0.935974	0.942201	0.00395346	0.932639	0.943874	0.931235	0.935916	0.00326559	0.936125	0.94863	0.937165	0.94064	0.00327107	0.931895	0.945488	0.941709	0.939697	0.00330751	0.940031	0.969596	0.941836	0.950488	0.00781262	0.935565	0.947844	0.936954	0.940121	0.00316985	0.941443	0.950448	0.940524	0.944138	0.00258486	0.936004	0.94729	0.946982	0.943425	0.0030306	12.2056	12.3726
		35	VDQTSENAPTTVSRDVEEKPAHAPARPEAPVDSM	35: 386-419	727.149	5	32	0.949994	0.957145	0.93677	0.947969	0.00487302	0.935059	0.942337	0.931988	0.936461	0.00250569	0.925185	0.943203	0.935545	0.934645	0.00426291	0.909533	0.9326	0.924914	0.922349	0.00553686	0.946894	0.95997	0.938789	0.948551	0.00503818	0.938432	0.940829	0.932874	0.937379	0.0019237	0.932072	0.945156	0.937147	0.938125	0.00310971	0.911852	0.932959	0.938382	0.927731	0.00660742	30.3998	30.6286
[truncated: 50 more columns]

## Sheet: additional controls for IRE1 wt
IRE1 wt (UK2042)
		for IRE1 alone
		1	14/12/18	and 24/01/19 for -ATP			for IRE1 + BiP (mut) + ERdj4 (mut)		18/12/18
		2	2019-08-01						31/01/19
		3	2019-11-01
									%Hx																										Deuterons
									ex IRE1 only 30s					ex IRE1+BiP V461F+ERdj4 30s				ex IRE1+BiP+ERdj4 QPD 30s				ex IRE1 only 300s					ex IRE1+BiP V461F+Erdj4 300s				ex IRE1+BiP+ERdj4 QPD 300s				ex IRE1 only 30s					ex IRE1+BiP V461F+ERdj4 30s				ex IRE1+BiP+ERdj4 QPD 30s				ex IRE1 only 300s
		Comment	#	Peptide Sequence	Peptide	m/z	charge	#H	1	2	3	Average	Error	1	2	Average	Error	1	2	Average	Error	1	2	3	Average	Error	1	2	Average	Error	1	2	Average	Error	1	2	3	Average	Error	1	3	Average	Error	1	3	Average	Error	1	2
			1	STSTVTLPETLL	1: 1-12	631.345	2	10	0.864834	0.864295	0.864732	0.86462	0.000135182	0.855924	0.844197	0.85006	0.00414621	0.852621	0.841447	0.847034	0.00395062	0.917138	0.915443	0.916226	0.916269	0.000399789	0.911109	0.875758	0.893433	0.0124984	0.909755	0.879305	0.89453	0.0107656	8.64834	8.64295	8.64732	8.6462	0.00135182	8.55924	8.44197	8.5006	0.0338537	8.52621	8.41447	8.47034	0.0322567	9.17138	9.15443
			2	FVSTLDGSL	2: 13-21	938.478	1	8	0.137779	0.150919	0.130235	0.139644	0.0049345	0.152229	0.143787	0.148008	0.00298446	0.149887	0.133514	0.1417	0.00578901	0.273931	0.280115	0.270453	0.274833	0.00230679	0.288072	0.261878	0.274975	0.00926117	0.284321	0.260278	0.272299	0.00850063	1.10223	1.20735	1.04188	1.11715	0.039476	1.21783	1.1503	1.18406	0.0194944	1.1991	1.06811	1.1336	0.0378137	2.19145	2.24092
			3	HAVSKRTGSIKWTL	3: 22-35	396.730	4	13	0.445457	0.450172	0.440901	0.44551	0.00218526	0.437579	0.432563	0.435071	0.00177352	0.440163	0.431688	0.435925	0.00299629	0.454481	0.456312	0.455125	0.455306	0.000437908	0.450103	0.437914	0.444008	0.00430943	0.452679	0.444051	0.448365	0.00305026	5.79094	5.85223	5.73171	5.79163	0.0284083	5.68853	5.62332	5.65593	0.0188249	5.72211	5.61194	5.66703	0.031804	5.90825	5.93205
			5	LPDPNDGSL	5: 53-61	927.435	1	6	0.0952821	0.0982465	0.0947211	0.0960832	0.000892996	0.0617895	0.0805407	0.0711651	0.00662955	0.0674441	0.0865026	0.0769733	0.00673819	0.197342	0.196126	0.19996	0.197809	0.000923509	0.182459	0.174691	0.178575	0.00274625	0.186916	0.178373	0.182644	0.00302042	0.571692	0.589479	0.568327	0.576499	0.00535798	0.370737	0.483244	0.42699	0.032478	0.404665	0.519015	0.46184	0.0330103	1.18405	1.17676
			6	YTLGSKNNEGLTKLPFTIPEL	6: 62-82	779.087	3	19	0.483084	0.493886	0.486174	0.487715	0.00262243	0.463572	0.465002	0.464287	0.000505691	0.469842	0.478034	0.473938	0.00289643	0.570357	0.579735	0.569358	0.57315	0.00269863	0.551799	0.54473	0.548265	0.0024993	0.556926	0.553123	0.555025	0.00134453	9.1786	9.38383	9.2373	9.26658	0.0498262	8.80786	8.83504	8.82145	0.00784501	8.92699	9.08265	9.00482	0.0449335	10.8368	11.015
			7	LTKLPFTIPEL	7: 72-82	636.380	2	8	0.147296	0.148314	0.150073	0.148561	0.000662233	0.132641	0.152544	0.142593	0.00703656	0.149092	0.148644	0.148868	0.000158445	0.231655	0.240405	0.241326	0.237795	0.00251615	0.247117	0.230259	0.238688	0.00596036	0.245726	0.235125	0.240426	0.00374796	1.17837	1.18651	1.20058	1.18849	0.00529786	1.06113	1.22035	1.14074	0.0459626	1.19273	1.18915	1.19094	0.00103496	1.85324	1.92324
			8	VQASPSRSSDGIL	8: 83-95	1316.68	1	11	0.43254	0.445178	0.431395	0.436371	0.00360564	0.415123	0.375	0.395061	0.0141856	0.408432	0.377183	0.392807	0.0110479	0.671161	0.674753	0.676502	0.674139	0.00128351	0.639137	0.613762	0.626449	0.00897168	0.643361	0.617772	0.630566	0.00904684	4.75794	4.89696	4.74535	4.80008	0.0396621	4.56635	4.125	4.34568	0.127408	4.49275	4.14902	4.32088	0.0992263	7.38277	7.42228
			9	YMGKKQDIW	9: 96-104	390.199	3	8	0.0852524	0.0870887	0.0812473	0.0845295	0.00140809	0.10349	0.126034	0.114762	0.00797053	0.103812	0.0872295	0.0955209	0.0058629	0.276389	0.285428	0.290079	0.283965	0.00328156	0.276168	0.29043	0.283299	0.0050422	0.285937	0.29122	0.288578	0.00186783	0.682019	0.696709	0.649979	0.676236	0.0112647	0.827919	1.00827	0.918095	0.0520633	0.830498	0.697836	0.764167	0.0382963	2.21111	2.28342
			10	YVIDLL	10: 105-110	735.424	1	5	0.0542887	0.0631446	0.0634168	0.0602834	0.00244816	0.0800695	0.0812082	0.0806389	0.000402616	0.112177	0.114792	0.113485	0.000924758	0.318265	0.336497	0.346804	0.333855	0.00681238	0.314896	0.314896	0.314896	0	0.33469	0.31699	0.32584	0.00625796	0.271444	0.315723	0.317084	0.301417	0.0122408	0.400347	0.406041	0.403194	0.00164367	0.560884	0.573962	0.567423	0.00377531	1.59133	1.68248
			11	LTGEKQQTLSSA	11: 110-121	631.832	2	11	0.776526	0.785433	0.778204	0.780054	0.00223108	0.788849	0.767999	0.778424	0.00737187	0.787177	0.774791	0.780984	0.00437924	0.937476	0.943084	0.929904	0.936821	0.00311824	0.936549	0.91135	0.92395	0.00890938	0.936875	0.915183	0.926029	0.00766922	8.54179	8.63976	8.56024	8.5806	0.0245418	8.67734	8.44798	8.56266	0.0662102	8.65895	8.5227	8.59082	0.039332	10.3122	10.3739
			13	ADSLSPSTSLL	13: 123-133	1090.56	1	9	0.798036	0.799046	0.794864	0.797315	0.00102866	0.772241	0.745744	0.758993	0.00936826	0.774589	0.746854	0.760722	0.00980592	0.808161	0.812005	0.806419	0.808862	0.00134747	0.790433	0.746351	0.768392	0.0155853	0.783249	0.753123	0.768186	0.0106509	7.18232	7.19141	7.15378	7.17584	0.00925797	6.95017	6.7117	6.83093	0.0688423	6.9713	6.72169	6.84649	0.0720585	7.27345	7.30805
			14	LYLGRTEYTITM	14: 133-144	730.874	2	11	0.01113	0.0106081	0.0122173	0.0113185	0.00038701	0.00173328	0.0137891	0.0077612	0.00426239	0.00429527	0.0127035	0.0084994	0.00297277	0.0269339	0.0278311	0.0293992	0.0280547	0.000588208	0.0165083	0.0292559	0.0228821	0.00450696	0.0218197	0.0281321	0.0249759	0.00223178	0.12243	0.116689	0.13439	0.124503	0.00425711	0.019066	0.15168	0.0853732	0.0382825	0.0472479	0.139739	0.0934934	0.0266998	0.296273	0.306142
			15	MYDTKTRE	15: 144-151	522.242	2	7	0.542662	0.570995	0.543684	0.552447	0.00757613	0.574246	0.547108	0.560677	0.00959478	0.603412	0.54805	0.575731	0.0195734	0.849278	0.836156	0.815489	0.833641	0.00803009	0.851355	0.781076	0.816216	0.0248471	0.894429	0.777609	0.836019	0.0413022	3.79863	3.99697	3.80579	3.86713	0.0530329	4.01972	3.82976	3.92474	0.0548388	4.22389	3.83635	4.03012	0.111871	5.94494	5.85309
			16	LRWNATYF	16: 152-159	535.772	2	7	0.197583	0.206664	0.203856	0.202701	0.00219191	0.194933	0.198059	0.196496	0.0011053	0.198615	0.198412	0.198513	7.17297e-05	0.332025	0.333165	0.332371	0.33252	0.000275384	0.315581	0.313117	0.314349	0.00087119	0.317538	0.314762	0.31615	0.000981539	1.38308	1.44665	1.42699	1.41891	0.0153434	1.36453	1.38641	1.37547	0.00631731	1.3903	1.38888	1.38959	0.00040997	2.32418	2.33215
			17	AASLPEDDVD	17: 162-171	1031.447	1	8	0.94038	0.93481	0.935891	0.937027	0.00139242	0.909467	0.940583	0.925025	0.0110013	0.889822	0.951799	0.92081	0.021912	0.934627	0.911927	0.944109	0.930221	0.00779586	0.915906	0.959039	0.937472	0.0152499	0.918957	0.948573	0.933765	0.010471	7.52304	7.47848	7.48713	7.49622	0.0111394	7.27574	7.52467	7.4002	0.07186	7.11858	7.61439	7.36648	0.143128	7.47702	7.29541
			18	YKMSHFVSNGDGL	18: 172-184	727.837	2	12	0.404407	0.409996	0.407055	0.407153	0.00131788	0.390395	0.356607	0.373501	0.0119459	0.384333	0.363402	0.373868	0.00740015	0.478299	0.477429	0.479254	0.478327	0.000430299	0.454086	0.427918	0.441002	0.00925187	0.46422	0.433711	0.448965	0.0107863	4.85289	4.91995	4.88466	4.88583	0.0158145	4.68474	4.27929	4.48201	0.117045	4.612	4.36083	4.48641	0.0725064	5.73958	5.72915
			19	VVTVDSESGDVLW	19: 185-197	703.343	2	12	0.370346	0.37725	0.380537	0.376044	0.00245197	0.316478	0.300379	0.308429	0.0056918	0.302652	0.292951	0.297802	0.00342964	0.440048	0.433088	0.433605	0.43558	0.00182794	0.413091	0.393063	0.403077	0.00708107	0.415449	0.3939	0.404675	0.00761887	4.44415	4.527	4.56644	4.51253	0.0294237	3.79774	3.60455	3.70115	0.055768	3.63182	3.51542	3.57362	0.0336034	5.28058	5.19706
			20	WIQNYASPVVAF	20: 197-208	697.856	2	10	0.204368	0.202192	0.202894	0.203151	0.000523446	0.191894	0.195549	0.193722	0.001292	0.200533	0.200195	0.200364	0.000119545	0.251052	0.250082	0.252444	0.251193	0.000559615	0.241336	0.243108	0.242222	0.000626352	0.247427	0.246559	0.246993	0.000306977	2.04368	2.02192	2.02894	2.03151	0.00523446	1.91894	1.95549	1.93722	0.0105491	2.00533	2.00195	2.00364	0.000976084	2.51052	2.50082
			21	YVWQREGL	21: 209-216	1050.54	1	7	0.607033	0.61945	0.621823	0.616102	0.00374451	0.626152	0.604535	0.615344	0.00764278	0.618411	0.606472	0.612442	0.00422119	0.777995	0.764437	0.775747	0.772727	0.0034254	0.811301	0.793741	0.802521	0.00620843	0.806449	0.778566	0.792507	0.00985809	4.24923	4.33615	4.35276	4.31271	0.0262116	4.38307	4.23175	4.30741	0.0436821	4.32888	4.2453	4.28709	0.0241261	5.44597	5.35106
			22	RKVMHINV	22: 217-224	332.864	3	7	0.273467	0.281788	0.278566	0.27794	0.00197786	0.308141	0.307821	0.307981	0.000113093	0.308164	0.307794	0.307979	0.000130754	0.375273	0.375134	0.379422	0.37661	0.00114867	0.410598	0.392648	0.401623	0.00634607	0.403423	0.396574	0.399998	0.00242145	1.91427	1.97251	1.94996	1.94558	0.013845	2.15699	2.15475	2.15587	0.000646379	2.15714	2.15456	2.15585	0.000747322	2.62691	2.62594
			24	LRYLTF	24: 229-234	406.735	2	5	0.743402	0.733068	0.733565	0.736678	0.00274732	0.725035	0.716071	0.720553	0.00316912	0.730666	0.718626	0.724646	0.00425685	0.923736	0.917951	0.92159	0.921092	0.00137862	0.912008	0.888456	0.900232	0.00832675	0.897159	0.885877	0.891518	0.00398877	3.71701	3.66534	3.66783	3.68339	0.0137366	3.62517	3.58035	3.60276	0.0129379	3.65333	3.59313	3.62323	0.0173785	4.61868	4.58976
			26	KSKLTPTL	26: 256-263	444.28	2	6	0.396076	0.398665	0.395024	0.396589	0.000883221	0.379014	0.401359	0.390186	0.00790005	0.390385	0.400135	0.39526	0.00344717	0.778603	0.78631	0.782322	0.782412	0.00181698	0.777882	0.7543	0.766091	0.00833721	0.766655	0.76065	0.763653	0.00212305	2.37646	2.39199	2.37015	2.37953	0.00529933	2.27408	2.40815	2.34112	0.0387022	2.34231	2.40081	2.37156	0.0168876	4.67162	4.71786
			27	YVGKYSTSL	27: 264-272	1017.53	1	8	0.644782	0.650112	0.64574	0.646878	0.00133943	0.64123	0.644383	0.642807	0.00111473	0.632544	0.638404	0.635474	0.00207153	0.892763	0.884652	0.888291	0.888569	0.00191533	0.880611	0.879346	0.879979	0.000447269	0.870925	0.878972	0.874949	0.00284509	5.15826	5.2009	5.16592	5.17502	0.0107155	5.12984	5.15507	5.14246	0.0072814	5.06036	5.10723	5.08379	0.0135312	7.14211	7.07721
			28	YASPSM	28: 273-278	655.273	1	4	0.133838	0.131689	0.124735	0.130087	0.00224284	0.0684168	0.0982338	0.0833253	0.0105419	0.082673	0.113935	0.0983039	0.0110527	0.685331	0.678328	0.675617	0.679759	0.00236294	0.749423	0.67768	0.713551	0.0253648	0.755464	0.680834	0.718149	0.0263856	0.53535	0.526755	0.498941	0.520349	0.00897137	0.273667	0.392935	0.333301	0.0344297	0.330692	0.455739	0.393216	0.036098	2.74133	2.71331
			29	VHEGVAVVPRGSTL	29: 279-292	474.268	3	12	0.817301	0.831296	0.820923	0.823173	0.00342426	0.818528	0.811716	0.815122	0.00240843	0.824639	0.81032	0.817479	0.00506247	0.938872	0.939068	0.928632	0.935524	0.00281414	0.946055	0.914266	0.93016	0.0112391	0.944467	0.907787	0.926127	0.0129683	9.80761	9.97555	9.85108	9.87808	0.0410911	9.82234	9.74059	9.78146	0.0235977	9.89566	9.72384	9.80975	0.0496018	11.2665	11.2688
			30	PLLEGPQTDGVTIGDKGES	30: 293-311	956.978	2	16	0.965904	0.952313	0.944908	0.954375	0.00501979	0.940048	0.899449	0.919749	0.014354	0.928572	0.907589	0.91808	0.00741845	0.96641	0.957257	0.945505	0.956391	0.00494005	0.921073	0.911171	0.916122	0.00350102	0.920773	0.913975	0.917374	0.00240339	15.4545	15.237	15.1185	15.27	0.0803167	15.0408	14.3912	14.716	0.18752	14.8571	14.5214	14.6893	0.0969142	15.4626	15.3161
			31	VKFDPGLKSKNKLNYLRN	31: 319-336	534.307	4	16	0.941279	0.951897	0.932963	0.942047	0.00447364	0.929719	0.893661	0.91169	0.0127487	0.925839	0.903995	0.914917	0.00772305	0.932541	0.947747	0.927738	0.936009	0.0049242	0.932049	0.911659	0.921854	0.00720877	0.923974	0.915224	0.919599	0.00309334	15.0605	15.2304	14.9274	15.0727	0.0715782	14.8755	14.2986	14.587	0.166549	14.8134	14.4639	14.6387	0.100893	14.9206	15.164
			32	IGHHETPLSASTKM	32: 341-354	503.588	3	12	0.882616	0.893637	0.877656	0.884636	0.0038559	0.894105	0.850236	0.872171	0.0155101	0.875675	0.854765	0.86522	0.00739269	0.943579	0.95448	0.935385	0.944481	0.00451562	0.964075	0.891472	0.927774	0.0256689	0.954983	0.894086	0.924534	0.0215303	10.5914	10.7236	10.5319	10.6156	0.0462708	10.7293	10.2028	10.4661	0.151967	10.5081	10.2572	10.3826	0.0724333	11.3229	11.4538
			33	LERFPNNLPKHRENVIPADSEKKSFE	33: 355-380	516.606	6	23	0.939285	0.953303	0.922988	0.938525	0.00715211	0.926611	0.889879	0.908245	0.0129868	0.931463	0.886921	0.909192	0.015748	0.942572	0.950949	0.927235	0.940252	0.00566918	0.924539	0.893727	0.909133	0.010894	0.925844	0.906872	0.916358	0.00670757	21.6036	21.926	21.2287	21.5861	0.164499	21.3121	20.4672	20.8896	0.243884	21.4236	20.3992	20.9114	0.295738	21.6791	21.8718
			34	VDQTSENAPTTVSRD	34: 386-400	810.376	2	13	0.938891	0.951737	0.935974	0.942201	0.00395346	0.949317	0.929762	0.93954	0.00691381	0.939235	0.927278	0.933257	0.00422736	0.940031	0.969596	0.941836	0.950488	0.00781262	0.944031	0.927406	0.935718	0.00587767	0.941911	0.928898	0.935405	0.00460076	12.2056	12.3726	12.1677	12.2486	0.051395	12.3411	12.0869	12.214	0.0733863	12.2101	12.0546	12.1323	0.0448711	12.2204	12.6048
			35	VDQTSENAPTTVSRDVEEKPAHAPARPEAPVDSM	35: 386-419	727.149	5	32	0.949994	0.957145	0.93677	0.947969	0.00487302	0.938487	0.895284	0.916886	0.0152746	0.931311	0.903202	0.917256	0.00993789	0.946894	0.95997	0.938789	0.948551	0.00503818	0.937988	0.902839	0.920413	0.0124272	0.937137	0.907866	0.922501	0.0103486	30.3998	30.6286	29.9766	30.335	0.155937	30.0316	28.6491	29.3403	0.399093	29.8019	28.9025	29.3522	0.259656	30.3006	30.7191
[truncated: 19 more columns]

## Sheet: IRE1∆∆
IRE1 ∆∆ (UK2459)
		1	02/01/19				w/o ATP	1	21/02/19			ERdJ4 only	21/02/19
		2	17/02/19					2	17/02/19				27/02/19
		3	20.02.2019					3	20.02.2019				28/02/19
									%Hx																																								Deuterons
									ex IRE1 dd only 30s					ex IRE1 dd+BiP+ERdj4+ATP 30s					ex IRE1dd+BiP+ERdj4-ATP 30s					ex IRE1 dd+ERdj4 30s					ex IRE1 dd only 300s					ex IRE1 dd+BiP+ERdj4+ATP 300s					ex IRE1 dd+BiP+ERdj4-ATP 300s					ex IRE1 dd+ERdj4 300s					ex IRE1 dd only 30s
		Comment	#	Peptide Sequence	Peptide	m/z	charge	#H	1	2	3	Average	Error	1	2	3	Average	Error	1	2	3	Average	Error	1	2	3	Average	Error	1	2	3	Average	Error	1	2	3	Average	Error	1	2	3	Average	Error	1	2	3	Average	Error	1
			1	STSTVTLPETLL	1: 1-12	631.345	2	10	0.872471	0.893122	0.87908	0.881557	0.00497153	0.86645	0.871796	0.867044	0.86843	0.00138125	0.862864	0.867532	0.862412	0.864269	0.00133611	0.873526	0.859605	0.886489	0.873207	0.006338	0.912551	0.926373	0.915394	0.918106	0.00344088	0.900165	0.902672	0.900707	0.901182	0.000621777	0.900131	0.899661	0.896797	0.898863	0.000850761	0.90942	0.889552	0.91403	0.904334	0.00613164	8.72471
			2	FVSTLDGSL	2: 13-21	938.478	1	8	0.149253	0.175583	0.145326	0.156721	0.00775594	0.133408	0.135366	0.128057	0.132277	0.00178358	0.130127	0.122411	0.120904	0.124481	0.0023322	0.128095	0.142005	0.128709	0.132936	0.00370518	0.281562	0.310485	0.286045	0.292697	0.00733844	0.275503	0.264098	0.268706	0.269436	0.00270467	0.264288	0.259484	0.255875	0.259882	0.00198974	0.271272	0.271645	0.265667	0.269528	0.00157858	1.19402
			3	HAVSKRTGSIKWTL	3: 22-35	396.730	4	13	0.451375	0.447411	0.460332	0.453039	0.0031203	0.449526	0.440151	0.442381	0.444019	0.00230884	0.446052	0.43673	0.438345	0.440376	0.0023485	0.45305	0.433993	0.449172	0.445405	0.00474756	0.462308	0.458244	0.464631	0.461727	0.00152399	0.456813	0.449594	0.455744	0.454051	0.00183673	0.454705	0.448451	0.442796	0.448651	0.00280812	0.467346	0.444869	0.462004	0.458073	0.00553578	5.86788
			5	LPDPNDGSL	5: 53-61	927.435	1	6	0.113107	0.0991978	0.0984974	0.103601	0.00388435	0.0996547	0.107759	0.0980778	0.10183	0.00244866	0.0831738	0.0751257	0.0773572	0.0785522	0.00195868	0.105405	0.114869	0.114929	0.111734	0.00258382	0.221321	0.203396	0.201774	0.20883	0.0051135	0.217663	0.209825	0.216386	0.214624	0.00198236	0.18586	0.178041	0.175747	0.179882	0.00249944	0.207879	0.21129	0.211829	0.210333	0.00100979	0.67864
			6	YTLGSKNNEGLTKLPFTIPEL	6: 62-82	779.087	3	19	0.507984	0.48211	0.510528	0.500207	0.00741243	0.492911	0.476487	0.487569	0.485656	0.00394911	0.482823	0.469857	0.477443	0.476708	0.00307102	0.486048	0.468544	0.475962	0.476851	0.00414185	0.589245	0.567018	0.577624	0.577962	0.00524056	0.595903	0.573557	0.591822	0.587094	0.00560964	0.574043	0.550886	0.564142	0.563024	0.00547725	0.574827	0.552339	0.56633	0.564499	0.00535301	9.6517
			7	LTKLPFTIPEL	7: 72-82	636.380	2	8	0.155276	0.157096	0.160564	0.157645	0.00126635	0.159858	0.162732	0.160189	0.160926	0.000741407	0.150975	0.145097	0.148128	0.148067	0.00138559	0.155456	0.151944	0.157607	0.155002	0.00134765	0.24091	0.235437	0.236392	0.23758	0.00137811	0.274359	0.267375	0.277257	0.272997	0.00239459	0.245645	0.230211	0.233558	0.236471	0.00382724	0.242951	0.243	0.249254	0.245068	0.00170886	1.24221
			8	VQASPSRSSDGIL	8: 83-95	1316.68	1	11	0.43648	0.436442	0.445408	0.439443	0.00243503	0.438412	0.443403	0.431849	0.437888	0.0027319	0.419926	0.421867	0.41087	0.417554	0.00276685	0.439895	0.426342	0.437362	0.434533	0.0033969	0.672571	0.675842	0.673913	0.674109	0.000774917	0.654785	0.652058	0.654329	0.653724	0.000688709	0.650129	0.655858	0.645171	0.650386	0.00252121	0.685349	0.662985	0.684178	0.677504	0.00593367	4.80128
			9	YMGKKQDIW	9: 96-104	390.199	3	8	0.0825139	0.080493	0.0823035	0.0817701	0.00052375	0.105184	0.0989891	0.0959537	0.100042	0.00221778	0.101018	0.0839447	0.0818792	0.0889474	0.00495195	0.0812753	0.092424	0.0941434	0.0892809	0.0032933	0.275644	0.265793	0.270541	0.270659	0.00232228	0.301798	0.292287	0.299738	0.297941	0.00235876	0.282714	0.270655	0.269751	0.274373	0.00341169	0.272199	0.283661	0.282697	0.279519	0.00299695	0.660112
			10	YVIDLL	10: 105-110	735.424	1	5	0.0681549	0.0794046	0.0621392	0.0698995	0.00413136	0.108402	0.0790773	0.0918791	0.0931195	0.00693045	0.113425	0.097898	0.0971002	0.102808	0.00433863	0.0739224	0.0723257	0.0864771	0.0775751	0.00365369	0.347652	0.348501	0.327302	0.341152	0.00565749	0.359028	0.342473	0.342975	0.348159	0.00443902	0.34828	0.347548	0.338264	0.344697	0.00263189	0.345845	0.344409	0.351585	0.34728	0.00178995	0.340774
			11	LTGEKQQTLSSA	11: 110-121	631.832	2	11	0.776809	0.766145	0.783848	0.775601	0.00420178	0.806281	0.786812	0.793022	0.795372	0.00468817	0.797494	0.775008	0.781919	0.784807	0.00542969	0.792077	0.773504	0.77974	0.781774	0.00445556	0.930668	0.91583	0.92322	0.923239	0.00349729	0.946777	0.922673	0.933011	0.934154	0.00570056	0.947369	0.919852	0.924812	0.930678	0.0069139	0.941031	0.915899	0.934615	0.930515	0.00615549	8.5449
			13	ADSLSPSTSLL	13: 123-133	1090.56	1	9	0.78143	0.770039	0.782084	0.777851	0.003193	0.768906	0.773014	0.777942	0.773287	0.00213271	0.761236	0.77508	0.770192	0.768836	0.00330947	0.779892	0.766974	0.779434	0.775434	0.00345506	0.791316	0.797533	0.78939	0.792746	0.00200629	0.76376	0.782692	0.774286	0.773579	0.00447164	0.768457	0.781499	0.764869	0.771608	0.00412536	0.792283	0.772833	0.802874	0.78933	0.00718245	7.03287
			14	LYLGRTEYTITM	14: 133-144	730.874	2	11	0.0141703	0.0129894	0.0143049	0.0138216	0.000341214	0.0076906	0.0156489	0.0102812	0.0112069	0.00191348	0.00961566	0.00850679	0.0107825	0.00963498	0.000536445	0.0125605	0.0233837	0.0247065	0.0202169	0.00314123	0.033013	0.0299099	0.0299843	0.0309691	0.000834612	0.027741	0.0254785	0.0297939	0.0276711	0.00101756	0.0279133	0.0248076	0.0272502	0.026657	0.00077103	0.0290699	0.0346016	0.0366984	0.0334566	0.00185782	0.155874
			15	MYDTKTRE	15: 144-151	522.242	2	7	0.562125	0.544664	0.58032	0.56237	0.00840491	0.57457	0.549131	0.576152	0.566617	0.00714869	0.582418	0.546715	0.550053	0.559729	0.00929641	0.58257	0.562195	0.565047	0.569937	0.00520083	0.824233	0.825807	0.835884	0.828641	0.00297999	0.812716	0.815457	0.838902	0.822358	0.00678462	0.819573	0.818651	0.818744	0.818989	0.000239255	0.831331	0.809276	0.836331	0.825646	0.00678595	3.93487
			16	LRWNATYF	16: 152-159	535.772	2	7	0.209336	0.208393	0.21407	0.2106	0.001434	0.204648	0.200818	0.19947	0.201645	0.00126637	0.204362	0.197915	0.19736	0.199879	0.00183479	0.209943	0.208555	0.208899	0.209132	0.000340747	0.33579	0.330135	0.329493	0.331806	0.00163366	0.339361	0.330905	0.339144	0.33647	0.00227256	0.326111	0.320793	0.319321	0.322075	0.00168374	0.331933	0.325381	0.333329	0.330214	0.00200058	1.46535
			17	AASLPEDDVD	17: 162-171	1031.447	1	8	0.922707	0.94225	0.926461	0.930473	0.00488898	0.963627	0.951377	0.93561	0.950205	0.00662105	0.939315	0.974127	0.924718	0.946053	0.0119663	0.946657	0.936814	0.960299	0.947923	0.00555952	0.935302	0.958395	0.910258	0.934652	0.0113491	0.960238	0.964135	0.936359	0.953577	0.00708906	0.944364	0.98541	0.941222	0.956999	0.0116225	0.95527	0.935329	0.954532	0.948377	0.00532961	7.38165
			18	YKMSHFVSNGDGL	18: 172-184	727.837	2	12	0.407677	0.4057	0.414312	0.409229	0.00212654	0.390359	0.386178	0.377377	0.384638	0.00312393	0.382665	0.385667	0.376265	0.381532	0.00226391	0.406577	0.401203	0.412355	0.406711	0.00262916	0.477792	0.485324	0.475324	0.47948	0.00245553	0.462265	0.465534	0.453479	0.460426	0.00293873	0.456676	0.451881	0.434437	0.447665	0.00551714	0.482899	0.475748	0.495732	0.484793	0.00477338	4.89212
			19	VVTVDSESGDVLW	19: 185-197	703.343	2	12	0.38432	0.356033	0.381456	0.373937	0.00734001	0.280555	0.28978	0.296688	0.289008	0.00381582	0.308059	0.293647	0.305795	0.3025	0.00365368	0.366138	0.341103	0.355191	0.354144	0.0059163	0.438783	0.432181	0.406638	0.425867	0.00800316	0.408602	0.399295	0.409484	0.405794	0.00266121	0.410538	0.396199	0.403695	0.403477	0.00338094	0.411417	0.392665	0.43217	0.412084	0.0093154	4.61184
			20	WIQNYASPVVAF	20: 197-208	697.856	2	10	0.20772	0.21472	0.204375	0.208938	0.00248861	0.194954	0.198693	0.188658	0.194102	0.00239059	0.195345	0.197221	0.196331	0.196299	0.00044228	0.210582	0.219599	0.21641	0.21553	0.00215533	0.254189	0.253787	0.241082	0.249686	0.00351381	0.248814	0.253553	0.24929	0.250552	0.00123017	0.244811	0.247896	0.24951	0.247406	0.00112545	0.244864	0.224445	0.236899	0.235403	0.00485138	2.0772
			21	YVWQREGL	21: 209-216	1050.54	1	7	0.620236	0.570201	0.595157	0.595198	0.0117935	0.616778	0.604918	0.609943	0.610547	0.00280633	0.624268	0.609658	0.611604	0.615177	0.00373965	0.599717	0.613329	0.599359	0.604135	0.00375434	0.77015	0.759902	0.755032	0.761695	0.00363787	0.789184	0.778476	0.777465	0.781708	0.00306133	0.786553	0.775622	0.781802	0.781326	0.00258378	0.768688	0.764125	0.758271	0.763695	0.00246146	4.34165
			22	RKVMHINV	22: 217-224	332.864	3	7	0.29028	0.275606	0.29154	0.285809	0.00417582	0.316395	0.303381	0.318119	0.312632	0.00379852	0.310662	0.29743	0.300202	0.302765	0.00328981	0.303483	0.281696	0.285047	0.290075	0.00553028	0.383398	0.373325	0.379547	0.378757	0.00239613	0.426757	0.415756	0.421834	0.421449	0.0025977	0.407053	0.399852	0.397407	0.401437	0.00236411	0.399708	0.374368	0.379418	0.384498	0.00632241	2.03196
			24	LRYLTF	24: 229-234	406.735	2	5	0.73554	0.73168	0.743904	0.737042	0.00294571	0.74091	0.764511	0.737088	0.747503	0.0070017	0.740983	0.74939	0.726947	0.739107	0.005345	0.731804	0.722966	0.727135	0.727302	0.00208433	0.928441	0.91749	0.906958	0.91763	0.00506398	0.912233	0.908959	0.907201	0.909464	0.00120369	0.90835	0.907778	0.901259	0.905796	0.0018568	0.914657	0.896571	0.919031	0.910086	0.00561309	3.6777
			26	KSKLTPTL	26: 256-263	444.28	2	6	0.39424	0.378616	0.397555	0.390137	0.00476791	0.403615	0.408485	0.401138	0.404412	0.00176208	0.387556	0.383881	0.384967	0.385468	0.000890028	0.38312	0.371452	0.377936	0.377503	0.0027557	0.76322	0.762183	0.752414	0.759272	0.00281046	0.76107	0.762776	0.771587	0.765144	0.00266092	0.751985	0.766378	0.758601	0.758988	0.00339623	0.758495	0.742398	0.759905	0.753599	0.00458494	2.36544
			27	YVGKYSTSL	27: 264-272	1017.53	1	8	0.658168	0.657489	0.670627	0.662095	0.0034869	0.686039	0.67636	0.675289	0.679229	0.00279163	0.674815	0.653283	0.658027	0.662042	0.00533317	0.682367	0.65831	0.673115	0.671264	0.00572056	0.87654	0.86906	0.881314	0.875638	0.0029116	0.901519	0.87961	0.888765	0.889965	0.00518717	0.895164	0.885395	0.873109	0.884556	0.00520961	0.900431	0.869977	0.889633	0.886681	0.00727848	5.26534
			28	YASPSM	28: 273-278	655.273	1	4	0.102128	0.11235	0.113492	0.109323	0.0029498	0.136466	0.139773	0.126712	0.134317	0.00320126	0.103829	0.0868465	0.0853915	0.0920222	0.00483218	0.123932	0.126356	0.132053	0.127447	0.00196534	0.615307	0.634064	0.634512	0.627961	0.00516702	0.683688	0.65807	0.680017	0.673925	0.00653026	0.648101	0.639865	0.631763	0.639909	0.00385087	0.649404	0.637705	0.641121	0.642744	0.00283597	0.408512
			31	VKFDPGLKSKNKLNYLRN	31: 319-336	534.307	4	16	0.921216	0.917579	0.92833	0.922375	0.00257798	0.935418	0.919526	0.936471	0.930472	0.00447528	0.936675	0.916605	0.92915	0.927476	0.00477969	0.939248	0.889533	0.908863	0.912548	0.0118142	0.925448	0.92302	0.94281	0.930426	0.00508801	0.941421	0.917886	0.939666	0.932991	0.00618052	0.940996	0.920013	0.932231	0.93108	0.00496786	0.958266	0.919763	0.927746	0.935258	0.00957949	14.7395
			33	IGHHETPLSASTKM	32: 341-354	503.588	3	12	0.877033	0.888436	0.89991	0.88846	0.00539223	0.920265	0.900669	0.899309	0.906748	0.00552781	0.918945	0.903308	0.907672	0.909975	0.00380387	0.925723	0.916673	0.920532	0.920976	0.00214083	0.938235	0.962198	0.947467	0.9493	0.00569748	0.966603	0.967143	0.952839	0.962195	0.00382164	0.966951	0.959501	0.945558	0.957336	0.00511914	0.974658	0.970381	0.971817	0.972285	0.00102619	10.5244
[truncated: 51 more columns]
