# Supplementary material for: Unstructured regions in IRE1α specify BiP-mediated destabilisation of the luminal domain dimer and repression of the UPR
Source: eLife. 2019 Dec 24;8:e50793. doi: 10.7554/eLife.50793 (PMC6996924; doi:10.7554/eLife.50793)
Supplement: Figure 7—source data 1. [file elife-50793-fig7-data1.xlsx]

## Sheet: peptide 655.273+ rep1
	Rep1
	m/z	10s IRE1 alone	10s IRE1+BiP+ERdj4	30s IRE1 alone	30s IRE1+BiP+ERdj4	100s IRE1 alone	100s IRE1+BiP+ERdj4	300s IRE1 alone	300s IRE1+BiP+ERdj4	1000s IRE1 alone	1000s IRE1+BiP+ERdj4
	655.276	57.6921
	656.28	27.4998
	657.282	9.83596
	658.288	3.40884
	659.295	1.21015
	660.298	0.353141
	655.275		49.3769
	656.279		24.1326
	657.284		12.2489
	658.291		8.99672
	659.297		3.74496
	660.3		1.49991
	655.276			51.63
	656.28			27.0496
	657.284			12.1612
	658.291			6.0537
	659.297			2.38968
	660.298			0.715821
	655.276				37.8056
	656.281				20.8322
	657.287				16.3973
	658.293				15.7054
	659.299				6.72042
	660.302				2.53905
	655.275					37.6421
	656.28					24.068
	657.286					17.213
	658.292					13.1946
	659.297					6.15624
	660.299					1.726
	655.274						29.86
	656.279						19.4887
	657.285						20.5116
	658.292						19.1126
	659.296						8.68572
	660.298						2.34133
	655.276							13.3351
	656.282							17.0662
	657.288							24.5563
	658.294							25.9223
	659.299							13.6356
	660.3							4.14745
	661.305							1.33712
	655.277								7.37497
	656.283								12.0287
	657.289								26.882
	658.295								31.6112
	659.3								15.786
	660.302								4.21064
	661.309								2.10653
	655.275									1.73699
	656.281									8.0872
	657.288									24.7051
	658.293									35.9528
	659.298									21.3594
	660.299									6.35882
	661.302									1.79968
	655.268										1.08172
	656.28										6.2009
	657.287										26.976
	658.292										39.2767
	659.297										20.1575
	660.299										4.74758
	661.305										1.55955

## Sheet: peptide 655.273+ rep2
	m/z	10s IRE1 alone	10s IRE1+BiP+ERdj4	30s IRE1 alone	30s IRE1+BiP+ERdj4	100s IRE1 alone	100s IRE1+BiP+ERdj4	300s IRE1 alone	300s IRE1+BiP+ERdj4	1000s IRE1 alone	1000s IRE1+BiP+ERdj4
	655.273	56.734
	656.277	27.3816
	657.279	10.2717
	658.285	3.79268
	659.293	1.38216
	660.296	0.437847
	655.272		48.1212
	656.276		23.6219
	657.281		13.1546
	658.288		8.82841
	659.295		4.43263
	660.296		1.84128
	655.272			52.1203
	656.276			26.9401
	657.279			11.8276
	658.286			5.87739
	659.292			2.46207
	660.294			0.772572
	655.268				35.4541
	656.273				19.7257
	657.279				17.3871
	658.286				16.7375
	659.291				7.94242
	660.293				2.75324
	655.273					37.5255
	656.277					24.0318
	657.283					17.3074
	658.289					13.0531
	659.294					6.24915
	660.296					1.83309
	655.271						29.4375
	656.276						19.7735
	657.282						20.2461
	658.288						18.891
	659.294						9.10755
	660.295						2.54436
	655.27							14.3938
	656.275							17.0965
	657.282							24.3333
	658.288							25.3506
	659.292							13.5014
	660.294							4.05272
	661.298							1.27156
	655.268								7.00605
	656.274								11.4112
	657.28								26.3444
	658.286								33.0235
	659.291								15.906
	660.292								4.14837
	661.3								2.16049
	655.272									1.84351
	656.279									8.01388
	657.285									24.3604
	658.291									35.6108
	659.296									21.5565
	660.297									6.63786
	661.3									1.97703
	655.266										1.17103
	656.278										6.01406
	657.284										25.7324
	658.29										38.577
	659.295										21.1447
	660.296										5.2997
	661.301										2.06107

## Sheet: peptide 655.273+ rep3
	m/z	10s IRE1 alone	10s IRE1+BiP+ERdj4	30s IRE1 alone	30s IRE1+BiP+ERdj4	100s IRE1 alone	100s IRE1+BiP+ERdj4	300s IRE1 alone	300s IRE1+BiP+ERdj4	1000s IRE1 alone	1000s IRE1+BiP+ERdj4
	655.275	57.5796
	656.279	27.0405
	657.281	10.0811
	658.288	3.57799
	659.295	1.32871
	660.297	0.392109
	655.275		50.4134
	656.279		23.6329
	657.283		11.4556
	658.292		8.8377
	659.296		4.16131
	660.299		1.49918
	655.274			52.9342
	656.278			26.7078
	657.282			11.7941
	658.289			5.64857
	659.295			2.25741
	660.297			0.657974
	655.274				39.0963
	656.278				21.6519
	657.284				15.2021
	658.291				15.2657
	659.297				6.59479
	660.299				2.18923
	655.275					37.9485
	656.28					23.5786
	657.285					16.7637
	658.292					13.4378
	659.297					6.45551
	660.298					1.81584
	655.273						29.105
	656.278						19.3303
	657.284						18.9692
	658.291						21.0176
	659.295						9.46362
	660.298						2.11415
	655.274							14.0281
	656.279							16.8999
	657.285							24.475
	658.292							25.9219
	659.296							13.4748
	660.298							3.90473
	661.303							1.29562
	655.273								6.93773
	656.279								11.9957
	657.286								25.6467
	658.292								33.1809
	659.296								16.2608
	660.298								3.74231
	661.306								2.23584
	655.275									1.31296
	656.281									7.02909
	657.288									23.298
	658.293									36.6037
	659.298									22.883
	660.3									6.96159
	661.302									1.91158
	655.263										1.02634
	656.28										5.73773
	657.286										24.871
	658.292										40.3479
	659.297										21.7092
	660.299										4.52996
	661.305										1.7779

## Sheet: 655.273+ %high exchanging
	after fitting of two Gaussian curves:
	Time (s)	rep1_% high HX IRE1 alone	rep2_% high HX IRE1 alone	rep3_% high HX IRE1 alone	rep1_% high HX IRE1+BiP+ERdj4	rep2_% high HX IRE1+BiP+ERdj4	rep3_% high HX IRE1+BiP+ERdj4
	10	8.5	9.7	9.4	22.6	24	21.7
	30	17.2	16.3	15.9	41.2	44.8	38.7
	100	38.7	38.6	38.4	53.2	53.2	54.3
	300	77	75.3	75.3	89.3	90.2	89.1
	1000	100	100	100	100	100	100

## Sheet: peptide 636.3802+ rep1
	m/z	100s IRE1 alone	100s IRE1+BiP+ERdj4	1000s IRE1 alone	1000s IRE1+BiP+ERdj4	2000s IRE1 alone	2000s IRE1+BiP+ERdj4	3000s IRE1 alone	3000s IRE1+BiP+ERdj4
	636.384	9.966
	636.887	35.2427
	637.389	30.5023
	637.891	14.9739
	638.393	5.62381
	638.895	1.90183
	639.4	0.870876
	639.903	0.556773
	640.406	0.255598
	640.906	0.10622
	636.383		8.89383
	636.886		31.5743
	637.388		28.2741
	637.89		15.5944
	638.392		7.00518
	638.895		3.57403
	639.399		2.41162
	639.902		1.52795
	640.402		0.797943
	640.903		0.346674
	636.381			3.22532
	636.887			13.2209
	637.39			26.827
	637.892			25.7373
	638.394			15.7974
	638.897			7.83038
	639.4			4.01125
	639.903			2.07287
	640.405			0.869985
	640.908			0.314127
	641.41			0.0935368
	636.379				2.27264
	636.884				10.6758
	637.387				21.802
	637.89				21.5
	638.392				14.7291
	638.895				10.3132
	639.399				8.62727
	639.901				6.0602
	640.403				2.61632
	640.903				0.998035
	641.4				0.405384
	636.378					1.68905
	636.886					6.44513
	637.389					19.013
	637.892					26.2124
	638.394					21.0812
	638.897					12.718
	639.399					6.93617
	639.902					3.75033
	640.405					1.52242
	640.906					0.492227
	641.408					0.140115
	636.378						1.28987
	636.884						4.82039
	637.388						15.5668
	637.891						21.9717
	638.393						18.4386
	638.896						13.6548
	639.399						11.3006
	639.902						7.6042
	640.404						3.56401
	640.905						1.34219
	641.404						0.446875
	636.378							1.23044
	636.884							4.33563
	637.387							14.1671
	637.89							23.3431
	638.392							22.5765
	638.895							16.1884
	639.398							9.91471
	639.9							5.1492
	640.403							2.15352
	640.904							0.701757
	641.405							0.239705
	636.375								1.19244
	636.883								3.44483
	637.386								10.7561
	637.89								18.2511
	638.392								18.9643
	638.895								16.8549
	639.398								14.004
	639.901								9.88411
	640.403								4.54248
	640.903								1.52394
	641.4								0.581819

## Sheet: peptide 636.3802+ rep2
	m/z	100s IRE1 alone	100s IRE1+BiP+ERdj4	1000s IRE1 alone	1000s IRE1+BiP+ERdj4	2000s IRE1 alone	2000s IRE1+BiP+ERdj4	3000s IRE1 alone	3000s IRE1+BiP+ERdj4
	636.38	9.73932
	636.884	34.6966
	637.386	30.593
	637.888	15.3597
	638.39	5.74708
	638.892	1.99558
	639.396	0.917108
	639.9	0.578222
	640.403	0.262217
	640.903	0.111046
	636.379		8.55354
	636.882		30.4956
	637.384		28.8362
	637.886		15.6707
	638.389		7.16137
	638.892		3.60884
	639.395		2.56715
	639.898		1.69841
	640.399		0.938263
	640.899		0.469993
	636.381			2.90406
	636.886			12.6372
	637.389			26.8699
	637.891			26.2629
	638.394			15.9731
	638.896			7.86088
	639.399			4.01836
	639.903			2.17736
	640.405			0.899188
	640.906			0.304787
	641.407			0.0922674
	636.38				2.45092
	636.885				10.5399
	637.388				22.3393
	637.89				22.0583
	638.393				14.4428
	638.896				9.82513
	639.399				8.20775
	639.902				5.70922
	640.404				2.85225
	640.905				1.13389
	641.401				0.440579
	636.381					1.27972
	636.888					6.53024
	637.391					19.3386
	637.894					26.0392
	638.396					21.1844
	638.898					12.682
	639.401					7.10095
	639.904					3.71004
	640.406					1.51383
	640.909					0.472754
	641.409					0.148288
	636.379						1.21475
	636.886						5.39298
	637.389						15.7633
	637.892						21.4492
	638.394						18.159
	638.897						13.5929
	639.4						11.3023
	639.903						7.80737
	640.405						3.61691
	640.907						1.25397
	641.404						0.447256
	636.377							1.36678
	636.886							3.98319
	637.389							13.8866
	637.892							23.3004
	638.394							23.3536
	638.897							16.1448
	639.4							9.73891
	639.903							5.24038
	640.405							2.12446
	640.906							0.674435
	641.407							0.186554
	636.377								0.998359
	636.884								3.13029
	637.388								10.9034
	637.89								19.0859
	638.394								20.034
	638.896								16.7054
	639.399								13.8584
	639.902								9.11404
	640.403								4.15751
	640.904								1.50876
	641.404								0.50399

## Sheet: peptide 636.3802+ rep3
	m/z	100s IRE1 alone	100s IRE1+BiP+ERdj4	1000s IRE1 alone	1000s IRE1+BiP+ERdj4	2000s IRE1 alone	2000s IRE1+BiP+ERdj4	3000s IRE1 alone	3000s IRE1+BiP+ERdj4
	636.383	9.59613
	636.886	35.3975
	637.388	30.8577
	637.89	15.1089
	638.392	5.43742
	638.894	1.83508
	639.399	0.848076
	639.903	0.550357
	640.405	0.274417
	640.907	0.0944887
	636.381		8.49637
	636.885		31.5813
	637.387		28.9043
	637.889		15.5426
	638.391		6.96748
	638.894		3.28113
	639.398		2.30104
	639.901		1.61291
	640.403		0.913611
	640.904		0.399373
	636.381			2.90406
	636.886			12.6372
	637.389			26.8699
	637.891			26.2629
	638.394			15.9731
	638.896			7.86088
	639.399			4.01836
	639.903			2.17736
	640.405			0.899188
	640.906			0.304787
	641.407			0.0922674
	636.38				2.45092
	636.885				10.5399
	637.388				22.3393
	637.89				22.0583
	638.393				14.4428
	638.896				9.82513
	639.399				8.20775
	639.902				5.70922
	640.404				2.85225
	640.905				1.13389
	641.401				0.440579
	636.382					1.30147
	636.888					6.60201
	637.391					19.18
	637.894					26.1403
	638.396					20.9409
	638.899					12.764
	639.402					7.20143
	639.904					3.74301
	640.407					1.52099
	640.909					0.46938
	641.41					0.136565
	636.38						1.10621
	636.885						5.30635
	637.389						15.1336
	637.891						20.576
	638.394						17.7609
	638.897						14.1705
	639.4						11.8962
	639.903						8.39245
	640.405						3.82252
	640.906						1.36463
	641.405						0.470561
	636.38							1.04969
	636.887							4.2147
	637.391							13.8682
	637.894							23.5773
	638.396							23.1172
	638.899							16.2574
	639.402							9.8154
	639.904							5.22274
	640.406							2.06531
	640.908							0.625614
	641.41							0.1864
	636.38								1.0307
	636.886								3.69479
	637.389								11.5978
	637.892								19.2727
	638.395								19.7981
	638.898								16.0351
	639.4								13.2421
	639.903								9.25806
	640.405								4.18009
	640.907								1.41094
	641.406								0.479683

## Sheet: 636.3802+ %high exchanging
	after fitting of two Gaussian curves:
	Time (s)	rep1_% high HX IRE1 alone	rep2_% high HX IRE1 alone	rep3_% high HX IRE1 alone	rep1_% high HX IRE1+BiP+ERdj4	rep2_% high HX IRE1+BiP+ERdj4	rep3_% high HX IRE1+BiP+ERdj4
	100	5.6	5.6	5.1	11.4	11.3	10.6
	1000	16	13.7	14.4	28.4	27.2	26.4
	2000	24.3	24.4	24.9	33.9	30.9	37.2
	3000	31.4	29.2	30.1	42	39.5	38.8
